# Supplementary material for: Time-varying asymmetry and tail thickness in long series of daily financial returns
Source: publisher site journal article supplement (doi:10.1515/snde-2017-0071), 2018-10-02
Supplement: Supplementary file 5 [file acc_summary.xlsx]

## Sheet: 1
	Var1	Var2	Var3	Var4
1	0.114494	0.0700313	0.125379	0.155815
2	0.051625	0.0665914	0.0789649	0.155815
3	0.0659496	0.066463	0.0464907	0.155815
4	0.0193818	0.0483647	0.000616111	0.155815
5	0.159419	0.19197	0.313703	0.155815
6	0.068414	0.184192	0.183421	0.155815
7	0.187478	0.187067	0.173538	0.155815
8	0.333239	0.185321	0.0778867	0.155815
