# Supplementary material for: Time-varying asymmetry and tail thickness in long series of daily financial returns
Source: publisher site journal article supplement (doi:10.1515/snde-2017-0071), 2018-10-02
Supplement: Supplementary file 7 [file add_par_res.xlsx]

## Sheet: 1
	(a1+a2)/2+b1	a0/[1-(a1+a2)/2-b1]	[a0/(1-(a1+a2)/2-b1)]^0.5	ni2/ni1	Var5	per_1	per_2	per_3	per_4
1	0.0934522	0.0313546	0.0431349	0.0491323	0.0496701	28.5252	16.7885	6.0665	5.42246
2	0.0109583	0.00601011	0.00518546	0.00414546	0.00328207	5.02158	5.18324	0.364642	0.410255
