# Supplementary material for: Time-varying asymmetry and tail thickness in long series of daily financial returns
Source: publisher site journal article supplement (doi:10.1515/snde-2017-0071), 2018-10-02
Supplement: Supplementary file 9 [file cvm1.xlsx]

## Sheet: 1
	Var1	Var2	Var3	Var4	Var5	Var6	Var7	Var8	Var9	Var10	Var11	Var12	Var13	Var14	Var15	Var16	Var17	Var18	Var19	Var20	Var21	Var22
1	0.000371914	-4.69935e-05	-0.000180972	-0.000127642	0.000230106	0.000380899	-0.000545708	-2.95369e-05	-5.98308e-05	2.75769e-05	-0.00014415	0.000407195	-0.000186691	-0.000165217	-0.00170933	0.00140342	0.00153431	8.89761e-05	-0.00175395	-0.000633445	0.000619077	-0.000957041
2	-4.69935e-05	0.000272423	-0.000124484	-6.30301e-05	-0.00017152	-9.52403e-05	7.7908e-05	-3.74757e-05	9.31834e-05	-5.85106e-05	-0.000555102	-0.000451326	-0.000755569	0.00122095	0.00128943	0.000332887	-0.00170119	0.000209801	-0.00134885	0.000942442	-0.000302603	-0.00177607
3	-0.000180972	-0.000124484	0.0554071	-0.00152497	-0.00416061	-0.00123024	0.000115773	-0.00925293	-0.00569769	-0.00059113	0.0349319	0.00170855	0.0354362	-0.0499669	-0.0206805	-0.0110763	-0.0226249	-0.0021797	-0.0353013	-0.00310197	-0.00671699	0.041892
4	-0.000127642	-6.30301e-05	-0.00152497	0.00320727	-0.000628907	-0.0049556	0.000206322	0.000933603	0.000404866	7.64241e-05	-0.00223448	0.000170289	0.000411711	-1.93356e-05	0.00120247	-0.000959636	0.00158177	0.000639699	0.00149347	0.00335997	-0.000296888	-0.00123914
5	0.000230106	-0.00017152	-0.00416061	-0.000628907	0.0141811	0.0165412	-0.000472816	-0.000535976	-0.000729568	0.000407294	-0.000733316	0.0030518	-0.00152413	0.000762471	-0.00840008	0.00987914	0.0077924	0.00158296	-0.0043536	-0.00370416	0.00188202	-0.000634822
6	0.000380899	-9.52403e-05	-0.00123024	-0.0049556	0.0165412	0.0261348	-0.000714579	-0.00212203	-0.0011341	0.000305122	0.00220452	0.00293374	-0.00189202	0.000991955	-0.0115257	0.0124325	0.00541777	0.000373003	-0.00799978	-0.00942453	0.00259855	-0.000559942
7	-0.000545708	7.7908e-05	0.000115773	0.000206322	-0.000472816	-0.000714579	0.000894784	0.000194654	1.77412e-05	-7.67012e-05	6.45469e-05	-0.000576817	0.000315561	0.000218136	0.00294488	-0.00233553	-0.00246581	-0.000131585	0.00326102	0.00138003	-0.00108213	0.00104428
8	-2.95369e-05	-3.74757e-05	-0.00925293	0.000933603	-0.000535976	-0.00212203	0.000194654	0.0110368	-0.00296554	0.0014094	-0.00323748	-0.00351059	-0.00386686	0.00657864	0.00431019	-0.000644858	-0.000167783	0.0017807	0.00502827	-0.00361575	0.000894549	-0.00502224
9	-5.98308e-05	9.31834e-05	-0.00569769	0.000404866	-0.000729568	-0.0011341	1.77412e-05	-0.00296554	0.0154028	-0.00179868	-0.00365577	0.00399043	-0.00126423	0.00489276	-0.00311387	0.00132429	0.00607988	-0.0037694	0.00148998	-0.000685173	0.00221836	-0.0075779
10	2.75769e-05	-5.85106e-05	-0.00059113	7.64241e-05	0.000407294	0.000305122	-7.67012e-05	0.0014094	-0.00179868	0.000584744	2.53783e-05	-0.00111015	-0.000429536	0.00100851	8.25493e-06	0.00034306	-0.000210955	0.000831171	-0.000119046	-0.00213499	0.000339894	0.000261959
11	-0.00014415	-0.000555102	0.0349319	-0.00223448	-0.000733316	0.00220452	6.45469e-05	-0.00323748	-0.00365577	2.53783e-05	0.199396	-0.00992534	0.0663867	-0.0634435	0.0028697	-0.0220854	-0.0444378	0.0180459	0.16857	-0.0790189	-0.0259935	0.247561
12	0.000407195	-0.000451326	0.00170855	0.000170289	0.0030518	0.00293374	-0.000576817	-0.00351059	0.00399043	-0.00111015	-0.00992534	0.0722851	-0.000133913	-0.019622	-0.0108652	-0.00225741	0.0323369	-0.0148655	-0.00441659	0.036827	0.00307394	-0.00729793
13	-0.000186691	-0.000755569	0.0354362	0.000411711	-0.00152413	-0.00189202	0.000315561	-0.00386686	-0.00126423	-0.000429536	0.0663867	-0.000133913	0.150036	-0.118671	-0.0304603	-0.0243004	-0.00201097	0.0219949	0.0327559	0.044389	-0.0274024	0.132447
14	-0.000165217	0.00122095	-0.0499669	-1.93356e-05	0.000762471	0.000991955	0.000218136	0.00657864	0.00489276	0.00100851	-0.0634435	-0.019622	-0.118671	0.228212	0.0301759	0.0228613	-0.0839431	0.0242132	0.0363548	-0.0285789	0.00975474	-0.125031
15	-0.00170933	0.00128943	-0.0206805	0.00120247	-0.00840008	-0.0115257	0.00294488	0.00431019	-0.00311387	8.25493e-06	0.0028697	-0.0108652	-0.0304603	0.0301759	0.0841126	-0.0213519	-0.0156478	-0.00686034	0.0801249	-0.00180366	-0.0034426	0.0401505
16	0.00140342	0.000332887	-0.0110763	-0.000959636	0.00987914	0.0124325	-0.00233553	-0.000644858	0.00132429	0.00034306	-0.0220854	-0.00225741	-0.0243004	0.0228613	-0.0213519	0.084783	0.0306302	-0.0061306	-0.0607123	-0.0547955	0.0208874	-0.0913322
17	0.00153431	-0.00170119	-0.0226249	0.00158177	0.0077924	0.00541777	-0.00246581	-0.000167783	0.00607988	-0.000210955	-0.0444378	0.0323369	-0.00201097	-0.0839431	-0.0156478	0.0306302	0.310816	-0.116497	-0.0548689	-0.0775237	0.0690574	-0.00175778
18	8.89761e-05	0.000209801	-0.0021797	0.000639699	0.00158296	0.000373003	-0.000131585	0.0017807	-0.0037694	0.000831171	0.0180459	-0.0148655	0.0219949	0.0242132	-0.00686034	-0.0061306	-0.116497	0.11529	0.0211982	0.0418281	-0.0331649	0.0628338
19	-0.00175395	-0.00134885	-0.0353013	0.00149347	-0.0043536	-0.00799978	0.00326102	0.00502827	0.00148998	-0.000119046	0.16857	-0.00441659	0.0327559	0.0363548	0.0801249	-0.0607123	-0.0548689	0.0211982	0.595834	0.101518	-0.0837264	0.28867
20	-0.000633445	0.000942442	-0.00310197	0.00335997	-0.00370416	-0.00942453	0.00138003	-0.00361575	-0.000685173	-0.00213499	-0.0790189	0.036827	0.044389	-0.0285789	-0.00180366	-0.0547955	-0.0775237	0.0418281	0.101518	0.690595	-0.142155	-0.0714461
21	0.000619077	-0.000302603	-0.00671699	-0.000296888	0.00188202	0.00259855	-0.00108213	0.000894549	0.00221836	0.000339894	-0.0259935	0.00307394	-0.0274024	0.00975474	-0.0034426	0.0208874	0.0690574	-0.0331649	-0.0837264	-0.142155	0.0534184	-0.0452086
22	-0.000957041	-0.00177607	0.041892	-0.00123914	-0.000634822	-0.000559942	0.00104428	-0.00502224	-0.0075779	0.000261959	0.247561	-0.00729793	0.132447	-0.125031	0.0401505	-0.0913322	-0.00175778	0.0628338	0.28867	-0.0714461	-0.0452086	0.855279
