# Supplementary material for: Time-varying asymmetry and tail thickness in long series of daily financial returns
Source: publisher site journal article supplement (doi:10.1515/snde-2017-0071), 2018-10-02
Supplement: Supplementary file 11 [file cvm2.xlsx]

## Sheet: 1
	Var1	Var2	Var3	Var4	Var5	Var6	Var7	Var8	Var9	Var10	Var11
1	0.000332473	-2.31208e-05	-5.30009e-06	-4.01475e-06	1.53377e-05	-1.39931e-06	-0.000485553	-0.000234967	-0.000415793	-7.96209e-07	8.07173e-05
2	-2.31208e-05	6.67594e-05	3.62935e-07	8.19027e-06	-3.1739e-06	2.52281e-07	2.71659e-05	-4.80298e-05	0.000146003	-5.2882e-06	2.60229e-05
3	-5.30009e-06	3.62935e-07	7.5518e-07	3.23535e-06	-3.27682e-06	6.81313e-07	8.27519e-06	-1.25172e-06	-4.00857e-05	2.98413e-07	-2.60891e-06
4	-4.01475e-06	8.19027e-06	3.23535e-06	4.92808e-05	-2.8065e-05	6.09902e-06	2.90134e-06	-0.000350959	-0.000348393	-1.14844e-06	0.000143886
5	1.53377e-05	-3.1739e-06	-3.27682e-06	-2.8065e-05	2.35711e-05	-9.55602e-06	-2.89004e-05	-0.000100308	6.0243e-05	-1.07757e-06	-6.77152e-05
6	-1.39931e-06	2.52281e-07	6.81313e-07	6.09902e-06	-9.55602e-06	1.2142e-05	4.87533e-06	7.54841e-05	6.08044e-05	6.17662e-07	-2.10106e-07
7	-0.000485553	2.71659e-05	8.27519e-06	2.90134e-06	-2.89004e-05	4.87533e-06	0.000796687	0.000624236	0.000121805	-1.01517e-05	-0.000185814
8	-0.000234967	-4.80298e-05	-1.25172e-06	-0.000350959	-0.000100308	7.54841e-05	0.000624236	0.152134	-0.0680546	0.00209544	-0.000439561
9	-0.000415793	0.000146003	-4.00857e-05	-0.000348393	6.0243e-05	6.08044e-05	0.000121805	-0.0680546	0.548576	-0.00372824	0.00409727
10	-7.96209e-07	-5.2882e-06	2.98413e-07	-1.14844e-06	-1.07757e-06	6.17662e-07	-1.01517e-05	0.00209544	-0.00372824	7.49021e-05	-0.000113444
11	8.07173e-05	2.60229e-05	-2.60891e-06	0.000143886	-6.77152e-05	-2.10106e-07	-0.000185814	-0.000439561	0.00409727	-0.000113444	0.0894719
