# Supplementary material for: Time-varying asymmetry and tail thickness in long series of daily financial returns
Source: publisher site journal article supplement (doi:10.1515/snde-2017-0071), 2018-10-02
Supplement: Supplementary file 13 [file cvm_ip.xlsx]

## Sheet: 1
	delta	rho	alpha0	fi1	beta1	d	lambda1	ni1	ni2	a00	gamma_s0	gamma_s1	gamma_s2	gamma_s3	gamma_c0	gamma_c1	gamma_c2	gamma_c3	phi0	phi1	phi2	phi3
1	0.000371914	-2.29321e-05	-7.02822e-06	-0.000127642	5.58638e-05	9.4241e-05	-0.000545708	-0.000108297	-0.000178241	8.77384e-06	-0.00014415	0.000407195	-0.000186691	-0.000165217	-0.00170933	0.00140342	0.00153431	8.89761e-05	-2.11295e-07	-5.9572e-07	8.31566e-07	5.07694e-07
2	-2.29321e-05	6.47624e-05	-2.27978e-07	-3.06995e-05	-2.09625e-05	-1.15681e-05	3.80214e-05	-5.53887e-05	0.000209052	-9.07865e-06	-0.00027095	-0.000219893	-0.000368207	0.000595512	0.000628985	0.000161761	-0.000830633	0.000102989	-1.11967e-07	8.91566e-08	-1.91947e-07	-2.96018e-07
3	-7.02822e-06	-2.27978e-07	6.61413e-05	-5.42957e-05	-3.57988e-05	-7.42034e-06	4.84006e-06	-0.00112414	-0.00109307	-5.46699e-06	0.000903254	-2.25289e-05	0.00107919	-0.00150956	-0.000714224	-0.000259671	-0.000824939	-7.63003e-05	-1.08032e-07	2.701e-08	-2.74945e-07	-5.81936e-07
4	-0.000127642	-3.06995e-05	-5.42957e-05	0.00320727	-0.000139659	-0.00122636	0.000206322	0.0032646	0.00204953	2.43148e-05	-0.00223448	0.000170289	0.000411711	-1.93356e-05	0.00120247	-0.000959636	0.00158177	0.000639699	-2.50004e-07	5.97815e-07	-4.07109e-07	-5.93629e-07
5	5.58638e-05	-2.09625e-05	-3.57988e-05	-0.000139659	0.000859498	0.00100059	-0.000114828	-0.000461079	-0.000710409	3.16568e-05	-0.000282962	0.000737924	-0.000405018	0.000200803	-0.00206763	0.0024306	0.0020882	0.000330136	1.60072e-07	1.36185e-07	1.32929e-06	1.76805e-06
6	9.4241e-05	-1.15681e-05	-7.42034e-06	-0.00122636	0.00100059	0.0015971	-0.000176821	-0.00182393	-0.0012948	2.40936e-05	0.000560629	0.000726434	-0.000458447	0.000237496	-0.002848	0.00306922	0.00132073	9.92392e-05	2.73728e-07	-8.61899e-09	1.54519e-06	1.94566e-06
7	-0.000545708	3.80214e-05	4.84006e-06	0.000206322	-0.000114828	-0.000176821	0.000894784	0.000678508	-8.82391e-05	-2.44034e-05	6.45469e-05	-0.000576817	0.000315561	0.000218136	0.00294488	-0.00233553	-0.00246581	-0.000131585	3.68262e-07	1.19066e-06	-1.33158e-06	-9.43539e-07
8	-0.000108297	-5.53887e-05	-0.00112414	0.0032646	-0.000461079	-0.00182393	0.000678508	0.135837	-0.0527388	0.00157075	-0.0118131	-0.0124424	-0.0143036	0.0241796	0.0152949	-0.0018657	-0.000915868	0.00626009	3.9683e-07	-7.16196e-06	-1.57293e-06	1.96378e-07
9	-0.000178241	0.000209052	-0.00109307	0.00204953	-0.000710409	-0.0012948	-8.82391e-05	-0.0527388	0.398223	-0.00291088	-0.0159481	0.0202629	-0.00687875	0.026612	-0.0164588	0.0077401	0.0312632	-0.018906	1.11089e-06	-1.16938e-05	1.16779e-05	3.81913e-06
10	8.77384e-06	-9.07865e-06	-5.46699e-06	2.43148e-05	3.16568e-05	2.40936e-05	-2.44034e-05	0.00157075	-0.00291088	5.91755e-05	7.9801e-06	-0.000353166	-0.000136655	0.000320835	2.61578e-06	0.000109102	-6.7244e-05	0.00026451	-1.19947e-08	-2.64957e-07	-9.29488e-09	1.35837e-07
11	-0.00014415	-0.00027095	0.000903254	-0.00223448	-0.000282962	0.000560629	6.45469e-05	-0.0118131	-0.0159481	7.9801e-06	0.199396	-0.00992534	0.0663867	-0.0634435	0.0028697	-0.0220854	-0.0444378	0.0180459	4.35563e-05	3.43858e-05	-2.63702e-05	3.46124e-05
12	0.000407195	-0.000219893	-2.25289e-05	0.000170289	0.000737924	0.000726434	-0.000576817	-0.0124424	0.0202629	-0.000353166	-0.00992534	0.0722851	-0.000133913	-0.019622	-0.0108652	-0.00225741	0.0323369	-0.0148655	-3.00755e-06	7.4312e-06	1.19319e-05	4.69514e-06
13	-0.000186691	-0.000368207	0.00107919	0.000411711	-0.000405018	-0.000458447	0.000315561	-0.0143036	-0.00687875	-0.000136655	0.0663867	-0.000133913	0.150036	-0.118671	-0.0304603	-0.0243004	-0.00201097	0.0219949	1.25505e-05	4.74568e-05	-1.46637e-05	1.30558e-06
14	-0.000165217	0.000595512	-0.00150956	-1.93356e-05	0.000200803	0.000237496	0.000218136	0.0241796	0.026612	0.000320835	-0.0634435	-0.019622	-0.118671	0.228212	0.0301759	0.0228613	-0.0839431	0.0242132	2.8464e-06	-2.71243e-05	-6.28235e-06	4.64319e-07
15	-0.00170933	0.000628985	-0.000714224	0.00120247	-0.00206763	-0.002848	0.00294488	0.0152949	-0.0164588	2.61578e-06	0.0028697	-0.0108652	-0.0304603	0.0301759	0.0841126	-0.0213519	-0.0156478	-0.00686034	9.15653e-06	5.01471e-06	-9.43637e-06	1.53007e-05
16	0.00140342	0.000161761	-0.000259671	-0.000959636	0.0024306	0.00306922	-0.00233553	-0.0018657	0.0077401	0.000109102	-0.0220854	-0.00225741	-0.0243004	0.0228613	-0.0213519	0.084783	0.0306302	-0.0061306	-5.41069e-06	-2.59188e-05	2.67714e-05	7.58553e-06
17	0.00153431	-0.000830633	-0.000824939	0.00158177	0.0020882	0.00132073	-0.00246581	-0.000915868	0.0312632	-6.7244e-05	-0.0444378	0.0323369	-0.00201097	-0.0839431	-0.0156478	0.0306302	0.310816	-0.116497	-1.3029e-05	-3.71865e-05	0.000107168	0.000104988
18	8.89761e-05	0.000102989	-7.63003e-05	0.000639699	0.000330136	9.92392e-05	-0.000131585	0.00626009	-0.018906	0.00026451	0.0180459	-0.0148655	0.0219949	0.0242132	-0.00686034	-0.0061306	-0.116497	0.11529	4.48522e-06	2.58836e-05	-4.73907e-05	-1.95794e-05
19	-2.11295e-07	-1.11967e-07	-1.08032e-07	-2.50004e-07	1.60072e-07	2.73728e-07	3.68262e-07	3.9683e-07	1.11089e-06	-1.19947e-08	4.35563e-05	-3.00755e-06	1.25505e-05	2.8464e-06	9.15653e-06	-5.41069e-06	-1.3029e-05	4.48522e-06	2.41937e-08	3.39299e-08	-5.1912e-09	1.74003e-08
20	-5.9572e-07	8.91566e-08	2.701e-08	5.97815e-07	1.36185e-07	-8.61899e-09	1.19066e-06	-7.16196e-06	-1.16938e-05	-2.64957e-07	3.43858e-05	7.4312e-06	4.74568e-05	-2.71243e-05	5.01471e-06	-2.59188e-05	-3.71865e-05	2.58836e-05	3.39299e-08	1.97949e-07	-2.10404e-08	-7.65836e-09
21	8.31566e-07	-1.91947e-07	-2.74945e-07	-4.07109e-07	1.32929e-06	1.54519e-06	-1.33158e-06	-1.57293e-06	1.16779e-05	-9.29488e-09	-2.63702e-05	1.19319e-05	-1.46637e-05	-6.28235e-06	-9.43637e-06	2.67714e-05	0.000107168	-4.73907e-05	-5.1912e-09	-2.10404e-08	5.17822e-08	4.12557e-08
22	5.07694e-07	-2.96018e-07	-5.81936e-07	-5.93629e-07	1.76805e-06	1.94566e-06	-9.43539e-07	1.96378e-07	3.81913e-06	1.35837e-07	3.46124e-05	4.69514e-06	1.30558e-06	4.64319e-07	1.53007e-05	7.58553e-06	0.000104988	-1.95794e-05	1.74003e-08	-7.65836e-09	4.12557e-08	1.3625e-07
