# Supplementary material for: Time-varying asymmetry and tail thickness in long series of daily financial returns
Source: publisher site journal article supplement (doi:10.1515/snde-2017-0071), 2018-10-02
Supplement: Supplementary file 15 [file data1.xls]

## Sheet: Arkusz1
sp
0
15625
0
0
0
0
0
0
0
0
1.134
0.473654
0.294898
0.587201
-0.293169
0.3517
-1.94984
-0.53844
0.299491
0.833834
-0.0593296
0.118624
0.177673
0.118273
-0.35524
-0.714289
-0.059755
0.536514
1.18205
0.176108
0
1.05018
0.347625
0.17336
-0.520985
-0.116144
0.405915
-0.23175
-1.04957
0
-0.411161
0.937324
0.291121
-0.174571
0.232694
0.405915
0
-0.347826
0.116077
-0.0580215
0.347625
0.17336
-0.695252
-0.0581564
-0.700528
0.117096
0.175387
0.756477
1.15275
0.228964
-0.228964
-0.057323
0.057323
0.57143
0.0569638
0
-0.571104
0.400115
-0.514728
-0.805992
-0.0578202
1.37854
0.114025
0.454805
0.847223
0.392928
-0.561799
1.06473
0.222717
-0.111297
-0.446429
0.835427
0.110865
-0.66704
0.167178
-0.726463
0
-0.393369
0.561484
0.558349
1.43728
-0.605562
0.87961
-0.824407
0.550359
0.274048
0
0.109409
0
-0.603237
0.439079
0.980934
0.432901
0.21575
0.644471
-0.429185
0.589656
-0.106952
0
-0.107066
0.267451
0.32
-0.0532623
0.106496
-1.01632
1.49416
0.26448
1.10324
0.625002
0.724266
-0.776201
-1.41253
-0.263783
0.211082
-0.263922
-0.476822
0.898764
0.838579
-0.104439
-5.53161
-1.11051
1.11051
-3.76979
1.42331
-0.283046
0.959105
0.559912
-1.34909
-0.453773
-1.54687
-2.6325
-1.07272
1.07272
-1.13265
2.25261
1.74322
1.42982
-0.113636
-0.627319
-1.44053
0.231884
1.323
1.07986
0.844362
1.00391
-0.389214
0.222593
0.83034
1.47746
0.271223
0.809284
-0.701
-1.08815
0.0546896
0.16389
0.109111
1.08461
0.752287
0.107009
-0.107009
0.74667
-0.159532
-1.33943
-0.053952
0.053952
-0.595079
-0.0542741
0.703276
0.698364
-0.752287
0.269324
0.856995
-0.749468
1.38743
1.15913
0.470343
0.571876
0.413865
-0.310238
-0.519212
0.82945
0.360732
-0.102934
-1.45231
1.4008
0.0515066
0.154361
1.22638
-0.152478
1.71462
-0.551518
1.14973
-0.598207
-1.10609
0.403633
-0.0503651
-0.707789
0.909097
0.601506
0.0499625
-0.30015
0
0.599402
-0.149514
-2.21895
0.8126
-0.8126
-0.40879
0.153492
0.865366
0.606369
-2.49949
1.02776
1.16901
0.7551
0.350438
-0.752449
-0.201613
-0.505818
0.707431
0.351848
-0.251193
1.39862
0.790518
-0.691361
-3.12054
-0.976119
0.720168
0.765896
-3.41471
1.61841
0.722397
-0.2574
0
1.63603
-0.203046
-0.0508259
-1.22764
-0.515997
2.65457
0.552626
0.0500877
0.0500626
0.449439
-0.750191
1.88966
0.393314
0.245038
1.65052
-0.385915
0.866223
0
0.620972
0.569802
-1.28665
1.61754
-0.378251
0.896021
0.748366
0.418508
-0.698489
-0.187091
-0.846267
0.377003
-0.471477
-0.616262
1.08774
1.91014
0.322507
-0.368664
0.506563
0.868974
1.08697
-0.361011
-0.589437
0.453721
0.361501
0.0450958
-0.270881
-0.543972
0.58917
-1.3649
-0.183402
0.320733
0.274098
0.04561
-0.778214
0.183655
0.229095
0.365464
-0.640441
0
0.320733
0.410866
0
-1.14549
-1.34542
-0.750121
0.188058
1.6306
-0.370371
-0.185701
0.556072
0.415034
-0.924648
-0.0929368
-1.16906
0.328716
0.700774
-0.747667
-0.281823
0.656355
1.34604
0.138217
-0.184332
-0.138472
-0.0462
0.874172
1.18398
-0.226603
0.226603
0.180914
-0.407517
0
0.0453618
-0.408999
0.045527
0.861098
1.03256
0.178492
0.444841
0.398672
0.836457
-0.175516
-0.616742
-0.0884173
0.132597
-0.57586
-0.802859
-0.674008
-1.91176
-0.32221
1.00918
-1.84252
-0.232721
-0.467072
-0.940741
-0.521205
-0.095057
0.852278
0.657897
0.7931
-0.186047
-1.12361
0.422834
0.700774
0.371748
-0.325204
0.556846
-0.417344
0.139308
1.33673
0.911583
0.0453618
-0.136147
-0.500798
-0.595104
-1.06163
-1.21383
0.0469594
0.3281
-1.2715
-0.665718
0.665718
0.614224
1.91282
0
0.415034
-0.461255
0.230894
0.551979
0.822298
-1.14392
0.870567
-0.182648
-0.182983
0.182983
1.00046
1.52675
-0.536194
0.669795
0.266667
0.442871
-1.02155
0.48987
1.36777
0.131377
0.697779
0.086881
-0.435162
-0.393271
-0.219154
0.0438693
-0.439561
0.395692
0.350416
0.30561
-0.0436015
-0.437064
-0.351032
0.657177
-0.0873744
-0.131205
0.218579
0.782953
0.690849
0.171969
0
0.599574
0.213265
0.255319
0.381761
-0.509339
0.424629
0.465019
-0.0843882
-0.295921
-0.127092
0
-0.0848176
-0.723869
-0.428266
0.34276
0.0855066
-0.557105
-0.042983
0.898786
0.721718
0.632513
-0.294675
0.252632
-0.126236
-0.421942
-0.169276
0.38047
0.630917
-0.335994
-0.337126
-0.0844595
-1.48971
-2.47462
0.394824
0.828433
-0.304414
-0.655454
-0.527474
-0.132304
1.22809
0.695051
-0.738652
-0.480875
-1.45666
-0.088968
1.23841
0.17567
0.262927
-0.0437733
-0.087604
-0.395171
-0.220216
-0.176523
-1.06573
0.133839
1.02019
-0.220897
0.265018
0.92207
0.566574
0.563382
-0.302965
1.16356
0.171233
0.17094
-0.5137
0.299979
0.0855432
-0.0855432
0.171013
0.341152
0.339992
0
-0.254885
0.127524
-0.425714
0.891915
0.16899
0.337126
0.12613
0.335571
0.167364
-0.0418148
-0.377122
-0.336417
0.504203
0.501673
0.747822
-0.414766
0.124611
0.455582
0.206398
0.862251
0.814337
-0.487806
0.0814664
-0.0407249
0.244101
-0.162668
-1.39347
-0.372132
0.660613
-0.743498
-0.041468
0.289915
-0.289915
0.537747
-0.537747
-0.791176
-0.209249
-0.0419024
-0.504203
-1.61362
-1.16255
0.302703
0.301789
-0.344977
0.129506
0.473425
-0.128894
0.128894
1.66067
0.126609
-0.0843882
0.126556
-0.507186
0.0847099
0.464626
0.084246
0
0.71324
-0.209249
-0.209688
0.29344
0.167294
0
-0.586758
-0.0420433
0.879219
0.788877
0.782702
-0.782702
-0.248447
0
-0.415456
-0.920124
0.46112
0.125392
0.707599
-0.665837
-1.26052
-0.296422
-0.723561
0.383714
0.80526
-0.465412
-0.42499
-0.213174
0.468385
0.0424719
-0.255102
-0.726344
-0.645302
1.6692
0.42355
0.0422565
0.589724
0.209776
-0.0838574
-0.378231
0.126236
-0.421408
-0.33841
-0.169635
0.211999
0.549104
0.16835
0.545189
-0.083682
0.209074
-0.250941
-0.167645
0.0838574
-0.251784
-0.0840689
0.712343
0.624352
0.661706
0.452396
-0.576133
0.329625
0
0.246508
-0.287652
0.123381
0.410173
0.326931
0.325866
-0.122075
0.162734
0.243605
0.364299
0.322711
0.522194
0.63898
-0.239139
-0.0399122
-0.319872
-0.0400561
-0.401446
-0.201329
0.682871
0.19996
0.518033
0
-0.43816
-0.801607
0.401607
0.2002
0.439035
0.516386
-0.317461
0.158856
0.237812
0.434526
0.11818
0.196657
-0.0786164
0.117901
-0.0785855
0.313972
0.117486
-0.117486
-0.826288
-0.118601
0
-0.316957
-1.03711
-0.200682
0.240771
0.120168
0.040024
-0.481349
-0.160966
0.442034
0.120216
0.24
0.478279
0.396826
-0.0396118
-0.11893
-0.397457
-1.00061
-0.686178
0.121433
-0.0404613
-1.05778
0.326664
0.203625
-0.285191
0.244499
0.081367
0.446339
0.36371
0.0806452
-0.322972
-0.202388
-0.568876
-0.244798
0.163265
-0.0815994
-0.245198
-0.1638
0.734997
-0.0406918
-0.0814332
-0.28554
-1.73057
-0.625393
1.20559
-0.289675
-0.248963
-1.12807
0.293686
0.668061
0.249377
0.165906
0.08285
0
1.52047
0.325733
0.284149
0.404531
0.0403633
-0.0403633
-0.485634
0.243112
0.161747
0.201816
1.44118
0.673403
-0.197589
-0.0395648
0.591834
-0.236314
0.628933
0.54709
0.077912
0.233372
-0.116618
-0.389712
0.0390396
0.54496
0.65777
0.192641
-0.0770119
0.307693
0
0.115141
-0.115141
-0.0384098
0.459947
0.571975
-0.419128
0.0763359
0.152497
0.569802
0.71712
-0.0752445
-0.112973
0.451129
-0.677458
-0.416273
-0.151803
-0.954024
-0.847136
0.61681
0.230326
0.191534
-0.421861
-0.0384394
0.498563
-0.191461
0.114921
-0.191608
-0.191975
0.11523
0.306631
0.267533
0.684674
0.491587
0.113101
-0.453173
-1.02721
1.36728
-3.14202
-0.272851
0.0780336
0.389257
-0.350263
-0.586512
-0.0784621
0.352596
0.234375
0.467109
0.619437
0.154262
-0.192864
0.115763
0.269594
-0.849754
0.0387822
0.193686
-0.0387072
0.309239
0.807231
0.0382775
0.191168
0.152672
0.41865
-0.342401
-0.0762486
-0.152672
-0.613029
0.574824
-0.26784
-0.57637
0.154024
-1.47289
-1.25738
-0.15829
-0.0792393
-2.48809
0.405516
0.886388
-0.200763
-0.241449
-0.201654
0.362684
0.401446
-0.200521
-1.17102
0.445796
-0.242915
-0.85488
-1.10998
0.0413309
0.576845
0.736802
0.650409
-0.243408
0.445796
1.08587
0.119928
-0.119928
-0.400802
0
0.0401526
-0.684796
-0.121335
0.564973
-0.0402495
-0.362977
-0.202225
0.926865
0.520105
-0.119784
-0.159936
-0.481349
-0.929112
-0.733201
0.326531
-1.60201
0.289436
-0.165289
-0.62228
0.249377
-0.332641
-1.72237
-0.254561
0.888143
0.294303
-0.843175
-0.296799
1.26584
-0.0419375
0
0.502093
0.66556
-0.124456
0.414251
0.0826446
-0.289556
0
0.413395
0.288363
0.205465
0.0820681
0.531807
-0.040808
-0.286123
-0.0819001
-0.988069
-0.373057
0.290276
0.124147
0.7006
-0.535311
-0.248037
0.124095
0.165221
0
-0.662528
0.166044
0.620221
0.943597
1.05606
0.362977
-0.241838
-0.404368
0.485045
-0.0806777
-0.121139
-0.121286
0.242424
-0.201979
-0.445796
-0.244002
-0.407997
-0.615134
-0.0823045
0.246711
-1.0735
-0.666391
-0.292949
-0.293809
-0.210394
-1.785
0.4279
0.596
-0.21245
0.254885
0.169563
0.169276
-1.01998
-1.16006
-1.87574
0.833155
0.479199
0.260417
-0.521514
-0.305477
1.38891
0.129227
0.0430385
0.257843
0.641713
0.17043
-0.597781
0.597781
0.424809
-0.46739
-0.384041
0.809031
0.169492
0.169205
-0.381114
0.465609
1.13375
0.790189
0.0828157
0.0413822
0.082713
0.453703
0.20555
-0.164406
-0.205888
0.123584
1.18684
-0.162866
0.487806
-0.61013
0.528994
-0.121827
0.202963
-1.18296
0.368626
0.326531
-0.654132
-0.534651
0.164813
0.451839
0.1638
-0.327869
0.573067
0.0815994
0.569339
0.404695
0.0807428
0.683695
0.0801282
0.04004
-0.120168
-0.321156
-0.1207
-0.241838
-0.0807428
-0.283114
0.0809717
1.00665
-0.0801603
0.20028
-0.160192
-0.764437
-0.283114
0.444535
-0.363563
-0.649617
0.851759
0.201735
0.562702
0.599402
0.159236
-0.318725
-0.520105
-0.522824
0.522824
0.560001
0.477518
0.948249
0
0.97829
0.272215
0.155219
0.232378
0.309
0.61515
-0.307102
0.0384394
0.230326
-0.345689
-0.269698
0.346621
0.727833
0.380953
-0.266515
-0.229008
-0.114701
-0.306514
0.229973
-0.306749
-0.88718
0.193536
0
0.23175
-0.347826
0
0.309239
0.92202
0.38168
0.266312
0
0.341362
0.415644
-0.264301
0.226586
0.226074
0.45062
0
-0.45062
-0.0376435
0.225649
0.412372
0.298842
-0.0746269
-0.711747
-0.48992
-0.189072
0.528503
0.375799
0.112465
0.932321
0.850125
0.147113
0.183587
-0.921326
0.36955
0.991016
0
0.691541
0.253577
0.756897
0.322639
-0.646322
-0.0360295
-0.397184
0.144613
0.360621
0.359325
-0.611623
0.180278
1.50164
0.283487
-0.177085
0.247832
0.0353544
0.774652
0.489854
-0.104767
-0.455263
0.80406
-0.558661
0.836825
0.138793
0.0346681
-0.451625
0.347585
0.588135
0.0344887
-0.241671
0.826166
-0.41223
0.48077
0
-0.102828
-0.0342994
-0.171674
-0.378723
-2.26767
-0.672688
0.672688
0.843294
0.13986
0.731074
0.725768
-0.275862
0.275862
0.0688468
0.0687995
0.171792
0.445282
-0.205269
0.273598
0.510987
-0.750345
0
1.29254
1.10907
0.0668226
0
0.665781
-0.066379
-0.332558
0.232906
0.331785
-0.431536
-0.266489
-0.468072
0.634711
0.796024
0.132057
0.0989283
0.591523
0.196399
0.359067
0.617186
0.355585
-0.193799
-0.0970403
-0.421599
-1.27557
-0.859509
0.826588
1.14586
-0.424075
0.424075
1.06849
0.225189
-0.0964475
0.2249
0.160334
-0.675135
-0.420237
-0.715218
-0.261353
0.293974
-1.01624
-1.72819
0.701523
0.76273
0.756956
0.523219
0.0652103
0.16284
0.357317
0.903815
0.512822
0.0319642
0.541834
0.791519
-0.442479
0.694447
0.658413
0.560924
0.681328
0.400432
0.490648
-0.582913
-0.586331
-0.0619195
0.5559
0.491552
0.397615
-0.213904
-0.0611995
-0.799021
-0.401917
-0.0309837
-1.21592
-0.534677
0.377715
0.25102
0.81149
-0.124417
0
-0.530505
-0.0625978
0.250156
-0.438185
-0.629329
0.346621
2.02405
1.16459
-0.335724
0.94326
0.392928
0.0904568
0.870223
0.208924
-0.208924
0.29833
0.178571
-0.566574
0.0298998
0.387887
1.33118
0.556778
0.959728
-0.0289477
-0.872352
-0.732819
0.557431
0.902875
0.779787
0.459243
-0.171969
-0.488858
-0.375452
0.0867679
-0.69626
0.609493
1.06491
2.79482
-1.65618
0.141423
-0.113122
0.0848536
-0.851794
1.02129
0.871159
0
0.669272
2.1175
-0.902015
-2.50222
-1.36057
0.82422
1.29361
-0.307822
-0.280663
-0.422476
-0.424269
-2.00408
0.634191
0.458716
0.485092
0.878566
0.225479
-0.0281571
1.23147
0.111204
0.554172
1.20847
0.245399
-0.300014
-0.465435
1.41692
0
-1.36205
0.792246
0.893952
0.188603
-0.702326
0
-0.325822
0.190192
0.13563
-0.108489
-0.0814443
-0.544664
-0.136631
0.518207
0.190243
0.865104
0.376142
0.614893
-0.641713
-1.89553
-0.989019
0.633001
-1.74351
-2.43018
2.12262
0.753247
0.38835
0.165975
-0.63774
0.610096
1.29105
0.788369
0.0812018
-0.352352
0.0542888
-0.899556
0.164159
1.0064
-0.325292
0.40645
0.512476
0.456315
0.267451
0.585887
0.132679
0.211921
0.448846
0.813333
-0.130736
0.156863
0.104439
-0.812267
0.262743
0.523424
-0.523424
-1.13473
0.740352
0.210526
-0.897814
-0.159278
0.477075
0.184916
0.105513
-0.211138
-1.14257
-0.589656
0.643089
-1.12813
-0.135153
0.835022
0.561724
0.664631
-0.691308
-0.053376
0.373035
0.662693
0.211138
-0.0527426
0.131804
0.131631
0.942662
3.38234
0.677969
-1.86921
-0.53688
0.613342
0.93826
0.126119
0.553043
0.175329
0.349738
0.0997009
0.917551
0.221921
0.368777
0.514014
0.0732154
-0.538162
0.0490436
0.586655
0.3892
1.20658
3.51161
-1.39928
0.140812
0.257642
0
-1.20016
0.0236714
0.354401
-0.0943842
-0.615678
0.308313
0.966191
0.840734
1.11009
0.229727
0.412183
-0.595922
0.0459664
-1.36497
0.232666
0.13934
-1.70864
0.471032
-0.589138
-1.3324
-0.023955
0.930017
0.189708
-0.0948092
-0.737835
0.095511
-0.143301
0.429288
-0.0952381
1.34865
0.140911
0.444914
0.442943
-0.069808
-0.0931532
0.603951
0.439053
0.528919
0.594559
-0.0228024
0.0683917
0.0227868
0.681202
1.37096
0.42321
-0.53488
0.756905
0.155125
-0.0664525
0.57446
0
0.527358
-6.84764
2.25094
1.66121
-0.633917
-0.820985
-2.73926
0.773653
0.396225
-0.676861
-0.752237
-2.94526
-0.854185
1.74932
-0.313593
-0.411573
0.314885
0.722895
1.00335
1.22846
0
0.748542
-0.654667
-0.800758
0.118161
0.0708299
-0.0708299
-0.14181
0.165426
2.07976
1.65141
0.43128
1.03651
0.246278
1.15608
2.55333
-0.431873
-0.651327
-0.699456
-0.109733
-0.705159
0.968317
0.13132
-0.0875274
-0.658909
0.395866
-0.109806
-0.352191
0.19826
0.570552
0
-0.328767
0.591005
0.152655
-1.02947
0.0660284
-0.839598
-0.0221902
0.155228
-0.244038
-0.155607
1.96063
-0.942473
0.197998
-0.617286
-0.376648
0.22173
0.728239
-0.706093
-0.354925
-0.111173
0.421801
-1.40549
-0.789448
0.496952
0.830253
-0.178931
-1.19357
0.74484
-0.676898
-1.02402
-1.15023
-0.254836
1.24483
0.160238
-0.596469
-0.253427
0.345423
0.73294
0.478089
0.430596
1.25844
0.0669718
-0.469747
-0.991446
-1.13871
-0.045819
-0.137583
-0.367817
1.41781
-0.500798
1.58482
-0.157356
0.247163
0.871417
0.819768
-0.110387
0.352812
-0.198303
0.440142
0.591135
0.544249
-0.0434311
-0.065182
0.238793
1.24975
0.916558
-0.148636
0.993771
0.963157
0.312078
0.930432
0.574596
-1.31825
1.01084
0.225525
-0.430991
-0.763914
0.537413
-0.061862
0.452769
-0.349687
0.554815
-0.472426
0.574832
-0.492511
-1.40877
0.789697
-0.602099
-0.145879
0.0208529
-0.0625717
-0.397199
-0.356731
0.398616
-0.230584
-0.821836
-0.360361
0.84585
1.04735
0.809385
-0.45577
0.020762
0.352295
0.351059
-0.599609
-0.415628
-0.166736
-1.64042
-0.0848536
-0.553311
-1.05117
-0.692494
1.20873
-0.473119
-0.865994
-1.60003
-0.53168
-0.937298
0.044833
-1.17224
2.26442
0.199314
0.837194
0.590617
0.0218079
-0.502788
0.785859
-1.86552
1.25483
1.41199
0.129338
-0.237248
0.129478
-0.432246
0.108237
0.410235
0.68714
-0.300043
-0.387097
0.665739
0.746352
0.127389
-0.340064
-0.085197
0.827591
1.00926
0.500836
0.436183
0.599237
0.308547
-0.226175
0.28777
0.858374
0.345353
-0.0202819
0.0405597
0.0608088
-0.0405351
0
0.22274
0.0808734
-0.811693
-0.163132
0.792768
0.4646
0.0402982
0
-1.37933
0.407665
0.406009
-0.0810701
-0.467433
-1.04434
-1.20109
2.04152
-0.224788
-0.122825
-1.17442
-0.748911
-0.986263
1.21569
-0.104221
-0.606633
-0.189016
-0.442432
-0.89078
1.207
0.79665
0.271088
0.166459
-0.604735
-0.524275
-0.379187
-0.698933
-2.06149
2.40097
-0.233273
-0.66035
-1.18243
-0.0648999
0.797504
-0.387181
-1.41077
0.152889
-0.481296
-0.549754
-1.44367
1.81783
1.65581
0.0216053
0.345051
-0.0430663
-0.4966
1.37577
-0.0640683
0.405075
-0.298317
-0.51348
-0.775198
0.172786
-0.216029
-0.0216286
-0.238224
-0.41282
-0.17433
0.91186
0.280566
-0.0646761
-1.71837
2.04133
0.983965
1.31108
-1.03475
-0.809894
-0.838084
0.323172
-0.474343
-0.563504
-0.632293
0.043735
-0.988693
-0.88712
-0.491292
1.04666
-0.599935
0.0891067
-1.07456
-0.1126
1.56498
1.97678
-0.304945
1.19268
0.901294
0.490145
-0.51151
-0.686109
-0.755861
0.798882
0.0859845
0
0
-0.236636
-0.778382
0.649072
0.043122
-0.0862627
0.452051
0.235976
-1.01218
0.862074
0.128673
-0.515687
-0.366894
-0.194784
0.238018
-0.1947
-0.695353
-1.49388
0.110607
-0.0221117
-1.29091
-0.539085
0.292365
0.76063
0.355951
-0.467447
-0.739002
0.493275
0.44633
-0.423966
-0.223864
-0.201907
-1.44766
-0.159617
-0.457457
-0.690134
-1.74646
-0.423729
1.52174
-0.116239
1.20233
-0.114982
0.0690052
0.321396
-0.344392
-0.230256
0.161235
-0.0921022
-0.346141
1.10346
0.728933
0.362483
0.0226116
-0.0452284
-0.317173
-0.660219
-0.0685479
0.66067
0.0680967
-0.0453926
-0.455063
0.432359
0.136147
0.0226732
-0.113417
-0.409371
0.0683449
0.409091
0.20392
-0.158568
0.0679887
0.632342
0.269784
-0.22477
0.112448
-0.225023
0.897068
0.423305
0
0
-0.0667186
0.155607
0.133185
0.729366
0.154032
0.373094
0.153223
-0.35057
-0.131781
0.504221
0.0218651
0.61029
0.800783
-0.10784
-0.151172
-0.303031
0.389442
0.10791
0.494891
0.620522
-0.448959
0.342246
0.404902
0.276097
0.423281
-0.0422476
-0.402245
0.0212112
0.127173
-0.914997
-0.192575
0.895528
0.676965
-0.126582
-0.190174
-0.0211528
1.11498
0.104548
0.104439
0.0834725
0.229191
0.18713
0.0207706
0.186741
-0.415456
-0.66834
-0.609566
-0.592093
-0.787825
0.787825
-0.127334
0.360361
0.232485
0.126582
0.986056
1.16232
0.473495
0.430373
0
0.20429
-0.286123
0.449255
0.101823
-0.510153
-0.615639
-0.102976
0.102976
-0.226687
0.18551
0.102912
0
-0.329693
-1.09994
0
-0.0208703
-0.250784
-0.230439
-0.884775
-1.25627
0.768414
-0.276802
0.0426348
-1.26543
-0.0647738
-1.23874
0.0437254
0.174711
-2.02784
0.842577
0.440626
-0.728078
-1.44979
-1.40274
1.62715
0.0672269
-0.404041
1.69496
0.485331
-0.861979
-0.511852
-0.312849
-0.899287
-0.930239
0.885062
1.25731
-0.0446329
-0.492281
0.134499
0.111944
-0.651029
-1.61202
-2.31545
0.677019
0
-0.958511
-0.0469925
-0.305991
0.798314
0.791991
0.0927644
-0.814621
-1.34104
-0.641561
0.0953062
-2.48355
-0.04884
0.730108
1.03728
-0.819282
-1.65898
-0.790323
-2.96952
-0.435173
4.39162
-0.0491159
-0.295203
-0.419702
0.665765
0.807739
0.0974659
-1.5215
-0.173246
0.148515
0.591864
-1.18725
-0.0248849
-1.45402
-0.126342
-0.278516
2.33064
-0.820798
-0.576082
0.275931
1.39306
0.958827
0.75564
-2.68258
2.85242
1.13295
-0.86664
0.024175
0.410084
-0.048158
-0.507064
[truncated: 13,636 more rows]
