# Supplementary material for: Time-varying asymmetry and tail thickness in long series of daily financial returns
Source: publisher site journal article supplement (doi:10.1515/snde-2017-0071), 2018-10-02
Supplement: Supplementary file 17 [file drawcvm0.xlsx]

## Sheet: 1
	Var1	Var2	Var3	Var4	Var5	Var6	Var7	Var8	Var9	Var10	Var11
1	0.00261961	0.000294046	0.0336444	-0.00639904	-0.0183617	-0.00411708	-0.00172341	-0.0293423	-0.00353643	-0.00145739	-0.0037359
2	0.000294046	0.000313188	-0.00730383	-0.000800461	0.00214536	0.00325786	-0.000317075	0.0102457	0.00100236	-9.07221e-05	-0.000529345
3	0.0336444	-0.00730383	4.94162	-0.0282915	-2.07623	-1.66148	0.001527	-5.85577	-0.508246	-0.0874323	-0.0945983
4	-0.00639904	-0.000800461	-0.0282915	0.0393782	0.0138448	-0.0495408	0.00392384	0.00846938	0.00654952	0.00247407	-0.00119813
5	-0.0183617	0.00214536	-2.07623	0.0138448	0.895993	0.721941	0.00363996	2.44935	0.210927	0.0390249	0.0409915
6	-0.00411708	0.00325786	-1.66148	-0.0495408	0.721941	0.737798	-0.00189154	2.00364	0.164525	0.0285291	-0.0104515
7	-0.00172341	-0.000317075	0.001527	0.00392384	0.00363996	-0.00189154	0.00169028	-0.00624618	-0.000664932	0.000779458	0.00112052
8	-0.0293423	0.0102457	-5.85577	0.00846938	2.44935	2.00364	-0.00624618	7.08366	0.592655	0.102554	0.0852506
9	-0.00353643	0.00100236	-0.508246	0.00654952	0.210927	0.164525	-0.000664932	0.592655	0.0649942	0.00758738	0.00750961
10	-0.00145739	-9.07221e-05	-0.0874323	0.00247407	0.0390249	0.0285291	0.000779458	0.102554	0.00758738	0.00240338	0.00281742
11	-0.0037359	-0.000529345	-0.0945983	-0.00119813	0.0409915	-0.0104515	0.00112052	0.0852506	0.00750961	0.00281742	0.06658
