# Supplementary material for: Time-varying asymmetry and tail thickness in long series of daily financial returns
Source: publisher site journal article supplement (doi:10.1515/snde-2017-0071), 2018-10-02
Supplement: Supplementary file 19 [file drawcvm1.xlsx]

## Sheet: 1
	Var1	Var2	Var3
1	0.138331	0.00298616	0.116877
2	0.00298616	0.12	-0.0899476
3	0.116877	-0.0899476	1.7474
