# Supplementary material for: Time-varying asymmetry and tail thickness in long series of daily financial returns
Source: publisher site journal article supplement (doi:10.1515/snde-2017-0071), 2018-10-02
Supplement: Supplementary file 23 [file initial.xls]

## Sheet: Arkusz1
	INI
0	1.134
1	0.473654
2	0.294898
3	0.587201
4	-0.293169
5	0.3517
6	-1.94984
7	-0.53844
8	0.299491
9	0.833834
10	-0.0593296
11	0.118624
12	0.177673
13	0.118273
14	-0.35524
15	-0.714289
16	-0.059755
17	0.536514
18	1.18205
19	0.176108
20	0
21	1.05018
22	0.347625
23	0.17336
24	-0.520985
25	-0.116144
26	0.405915
27	-0.23175
28	-1.04957
29	0
30	-0.411161
31	0.937324
32	0.291121
33	-0.174571
34	0.232694
35	0.405915
36	0
37	-0.347826
38	0.116077
39	-0.0580215
40	0.347625
41	0.17336
42	-0.695252
43	-0.0581564
44	-0.700528
45	0.117096
46	0.175387
47	0.756477
48	1.15275
49	0.228964
50	-0.228964
51	-0.057323
52	0.057323
53	0.57143
54	0.0569638
55	0
56	-0.571104
57	0.400115
58	-0.514728
59	-0.805992
60	-0.0578202
61	1.37854
62	0.114025
63	0.454805
64	0.847223
65	0.392928
66	-0.561799
67	1.06473
68	0.222717
69	-0.111297
70	-0.446429
71	0.835427
72	0.110865
73	-0.66704
74	0.167178
75	-0.726463
76	0
77	-0.393369
78	0.561484
79	0.558349
80	1.43728
81	-0.605562
82	0.87961
83	-0.824407
84	0.550359
85	0.274048
86	0
87	0.109409
88	0
89	-0.603237
90	0.439079
91	0.980934
92	0.432901
93	0.21575
94	0.644471
95	-0.429185
96	0.589656
97	-0.106952
98	0
99	-0.107066
100	0.267451
101	0.32
102	-0.0532623
103	0.106496
104	-1.01632
105	1.49416
106	0.26448
107	1.10324
108	0.625002
109	0.724266
110	-0.776201
111	-1.41253
112	-0.263783
113	0.211082
114	-0.263922
115	-0.476822
116	0.898764
117	0.838579
118	-0.104439
119	-5.53161
120	-1.11051
121	1.11051
122	-3.76979
123	1.42331
124	-0.283046
125	0.959105
126	0.559912
127	-1.34909
128	-0.453773
129	-1.54687
130	-2.6325
131	-1.07272
132	1.07272
133	-1.13265
134	2.25261
135	1.74322
136	1.42982
137	-0.113636
138	-0.627319
139	-1.44053
140	0.231884
141	1.323
142	1.07986
143	0.844362
144	1.00391
145	-0.389214
146	0.222593
147	0.83034
148	1.47746
149	0.271223
150	0.809284
151	-0.701
152	-1.08815
153	0.0546896
154	0.16389
155	0.109111
156	1.08461
157	0.752287
158	0.107009
159	-0.107009
160	0.74667
161	-0.159532
162	-1.33943
163	-0.053952
164	0.053952
165	-0.595079
166	-0.0542741
167	0.703276
168	0.698364
169	-0.752287
170	0.269324
171	0.856995
172	-0.749468
173	1.38743
174	1.15913
175	0.470343
176	0.571876
177	0.413865
178	-0.310238
179	-0.519212
180	0.82945
181	0.360732
182	-0.102934
183	-1.45231
184	1.4008
185	0.0515066
186	0.154361
187	1.22638
188	-0.152478
189	1.71462
190	-0.551518
191	1.14973
192	-0.598207
193	-1.10609
194	0.403633
195	-0.0503651
196	-0.707789
197	0.909097
198	0.601506
199	0.0499625
200	-0.30015
201	0
202	0.599402
203	-0.149514
204	-2.21895
205	0.8126
206	-0.8126
207	-0.40879
208	0.153492
209	0.865366
210	0.606369
211	-2.49949
212	1.02776
213	1.16901
214	0.7551
215	0.350438
216	-0.752449
217	-0.201613
218	-0.505818
219	0.707431
220	0.351848
221	-0.251193
222	1.39862
223	0.790518
224	-0.691361
225	-3.12054
226	-0.976119
227	0.720168
228	0.765896
229	-3.41471
230	1.61841
231	0.722397
232	-0.2574
233	0
234	1.63603
235	-0.203046
236	-0.0508259
237	-1.22764
238	-0.515997
239	2.65457
240	0.552626
241	0.0500877
242	0.0500626
243	0.449439
244	-0.750191
245	1.88966
246	0.393314
247	0.245038
248	1.65052
249	-0.385915
250	0.866223
251	0
252	0.620972
253	0.569802
254	-1.28665
255	1.61754
256	-0.378251
257	0.896021
258	0.748366
259	0.418508
260	-0.698489
261	-0.187091
262	-0.846267
263	0.377003
264	-0.471477
265	-0.616262
266	1.08774
267	1.91014
268	0.322507
269	-0.368664
270	0.506563
271	0.868974
272	1.08697
273	-0.361011
274	-0.589437
275	0.453721
276	0.361501
277	0.0450958
278	-0.270881
279	-0.543972
280	0.58917
281	-1.3649
282	-0.183402
283	0.320733
284	0.274098
285	0.04561
286	-0.778214
287	0.183655
288	0.229095
289	0.365464
290	-0.640441
291	0
292	0.320733
293	0.410866
294	0
295	-1.14549
296	-1.34542
297	-0.750121
298	0.188058
299	1.6306
300	-0.370371
301	-0.185701
302	0.556072
303	0.415034
304	-0.924648
305	-0.0929368
306	-1.16906
307	0.328716
308	0.700774
309	-0.747667
310	-0.281823
311	0.656355
312	1.34604
313	0.138217
314	-0.184332
315	-0.138472
316	-0.0462
317	0.874172
318	1.18398
319	-0.226603
320	0.226603
321	0.180914
322	-0.407517
323	0
324	0.0453618
325	-0.408999
326	0.045527
327	0.861098
328	1.03256
329	0.178492
330	0.444841
331	0.398672
332	0.836457
333	-0.175516
334	-0.616742
335	-0.0884173
336	0.132597
337	-0.57586
338	-0.802859
339	-0.674008
340	-1.91176
341	-0.32221
342	1.00918
343	-1.84252
344	-0.232721
345	-0.467072
346	-0.940741
347	-0.521205
348	-0.095057
349	0.852278
350	0.657897
351	0.7931
352	-0.186047
353	-1.12361
354	0.422834
355	0.700774
356	0.371748
357	-0.325204
358	0.556846
359	-0.417344
360	0.139308
361	1.33673
362	0.911583
363	0.0453618
364	-0.136147
365	-0.500798
366	-0.595104
367	-1.06163
368	-1.21383
369	0.0469594
370	0.3281
371	-1.2715
372	-0.665718
373	0.665718
374	0.614224
375	1.91282
376	0
377	0.415034
378	-0.461255
379	0.230894
380	0.551979
381	0.822298
382	-1.14392
383	0.870567
384	-0.182648
385	-0.182983
386	0.182983
387	1.00046
388	1.52675
389	-0.536194
390	0.669795
391	0.266667
392	0.442871
393	-1.02155
394	0.48987
395	1.36777
396	0.131377
397	0.697779
398	0.086881
399	-0.435162
400	-0.393271
401	-0.219154
402	0.0438693
403	-0.439561
404	0.395692
405	0.350416
406	0.30561
407	-0.0436015
408	-0.437064
409	-0.351032
410	0.657177
411	-0.0873744
412	-0.131205
413	0.218579
414	0.782953
415	0.690849
416	0.171969
417	0
418	0.599574
419	0.213265
420	0.255319
421	0.381761
422	-0.509339
423	0.424629
424	0.465019
425	-0.0843882
426	-0.295921
427	-0.127092
428	0
429	-0.0848176
430	-0.723869
431	-0.428266
432	0.34276
433	0.0855066
434	-0.557105
435	-0.042983
436	0.898786
437	0.721718
438	0.632513
439	-0.294675
440	0.252632
441	-0.126236
442	-0.421942
443	-0.169276
444	0.38047
445	0.630917
446	-0.335994
447	-0.337126
448	-0.0844595
449	-1.48971
450	-2.47462
451	0.394824
452	0.828433
453	-0.304414
454	-0.655454
455	-0.527474
456	-0.132304
457	1.22809
458	0.695051
459	-0.738652
460	-0.480875
461	-1.45666
462	-0.088968
463	1.23841
464	0.17567
465	0.262927
466	-0.0437733
467	-0.087604
468	-0.395171
469	-0.220216
470	-0.176523
471	-1.06573
472	0.133839
473	1.02019
474	-0.220897
475	0.265018
476	0.92207
477	0.566574
478	0.563382
479	-0.302965
480	1.16356
481	0.171233
482	0.17094
483	-0.5137
484	0.299979
485	0.0855432
486	-0.0855432
487	0.171013
488	0.341152
489	0.339992
490	0
491	-0.254885
492	0.127524
493	-0.425714
494	0.891915
495	0.16899
496	0.337126
497	0.12613
498	0.335571
499	0.167364
500	-0.0418148
501	-0.377122
502	-0.336417
503	0.504203
504	0.501673
505	0.747822
506	-0.414766
507	0.124611
508	0.455582
509	0.206398
510	0.862251
511	0.814337
512	-0.487806
513	0.0814664
514	-0.0407249
515	0.244101
516	-0.162668
517	-1.39347
518	-0.372132
519	0.660613
520	-0.743498
521	-0.041468
522	0.289915
523	-0.289915
524	0.537747
525	-0.537747
526	-0.791176
527	-0.209249
528	-0.0419024
529	-0.504203
530	-1.61362
531	-1.16255
532	0.302703
533	0.301789
534	-0.344977
535	0.129506
536	0.473425
537	-0.128894
538	0.128894
539	1.66067
540	0.126609
541	-0.0843882
542	0.126556
543	-0.507186
544	0.0847099
545	0.464626
546	0.084246
547	0
548	0.71324
549	-0.209249
550	-0.209688
551	0.29344
552	0.167294
553	0
554	-0.586758
555	-0.0420433
556	0.879219
557	0.788877
558	0.782702
559	-0.782702
560	-0.248447
561	0
562	-0.415456
563	-0.920124
564	0.46112
565	0.125392
566	0.707599
567	-0.665837
568	-1.26052
569	-0.296422
570	-0.723561
571	0.383714
572	0.80526
573	-0.465412
574	-0.42499
575	-0.213174
576	0.468385
577	0.0424719
578	-0.255102
579	-0.726344
580	-0.645302
581	1.6692
582	0.42355
583	0.0422565
584	0.589724
585	0.209776
586	-0.0838574
587	-0.378231
588	0.126236
589	-0.421408
590	-0.33841
591	-0.169635
592	0.211999
593	0.549104
594	0.16835
595	0.545189
596	-0.083682
597	0.209074
598	-0.250941
599	-0.167645
600	0.0838574
601	-0.251784
602	-0.0840689
603	0.712343
604	0.624352
605	0.661706
606	0.452396
607	-0.576133
608	0.329625
609	0
610	0.246508
611	-0.287652
612	0.123381
613	0.410173
614	0.326931
615	0.325866
616	-0.122075
617	0.162734
618	0.243605
619	0.364299
620	0.322711
621	0.522194
622	0.63898
623	-0.239139
624	-0.0399122
625	-0.319872
626	-0.0400561
627	-0.401446
628	-0.201329
629	0.682871
630	0.19996
631	0.518033
632	0
633	-0.43816
634	-0.801607
635	0.401607
636	0.2002
637	0.439035
638	0.516386
639	-0.317461
640	0.158856
641	0.237812
642	0.434526
643	0.11818
644	0.196657
645	-0.0786164
646	0.117901
647	-0.0785855
648	0.313972
649	0.117486
650	-0.117486
651	-0.826288
652	-0.118601
653	0
654	-0.316957
655	-1.03711
656	-0.200682
657	0.240771
658	0.120168
659	0.040024
660	-0.481349
661	-0.160966
662	0.442034
663	0.120216
664	0.24
665	0.478279
666	0.396826
667	-0.0396118
668	-0.11893
669	-0.397457
670	-1.00061
671	-0.686178
672	0.121433
673	-0.0404613
674	-1.05778
675	0.326664
676	0.203625
677	-0.285191
678	0.244499
679	0.081367
680	0.446339
681	0.36371
682	0.0806452
683	-0.322972
684	-0.202388
685	-0.568876
686	-0.244798
687	0.163265
688	-0.0815994
689	-0.245198
690	-0.1638
691	0.734997
692	-0.0406918
693	-0.0814332
694	-0.28554
695	-1.73057
696	-0.625393
697	1.20559
698	-0.289675
699	-0.248963
700	-1.12807
701	0.293686
702	0.668061
703	0.249377
704	0.165906
705	0.08285
706	0
707	1.52047
708	0.325733
709	0.284149
710	0.404531
711	0.0403633
712	-0.0403633
713	-0.485634
714	0.243112
715	0.161747
716	0.201816
717	1.44118
718	0.673403
719	-0.197589
720	-0.0395648
721	0.591834
722	-0.236314
723	0.628933
724	0.54709
725	0.077912
726	0.233372
727	-0.116618
728	-0.389712
729	0.0390396
730	0.54496
731	0.65777
732	0.192641
733	-0.0770119
734	0.307693
735	0
736	0.115141
737	-0.115141
738	-0.0384098
739	0.459947
740	0.571975
741	-0.419128
742	0.0763359
743	0.152497
744	0.569802
745	0.71712
746	-0.0752445
747	-0.112973
748	0.451129
749	-0.677458
750	-0.416273
751	-0.151803
752	-0.954024
753	-0.847136
754	0.61681
755	0.230326
756	0.191534
757	-0.421861
758	-0.0384394
759	0.498563
760	-0.191461
761	0.114921
762	-0.191608
763	-0.191975
764	0.11523
765	0.306631
766	0.267533
767	0.684674
768	0.491587
769	0.113101
770	-0.453173
771	-1.02721
772	1.36728
773	-3.14202
774	-0.272851
775	0.0780336
776	0.389257
777	-0.350263
778	-0.586512
779	-0.0784621
780	0.352596
781	0.234375
782	0.467109
783	0.619437
784	0.154262
785	-0.192864
786	0.115763
787	0.269594
788	-0.849754
789	0.0387822
790	0.193686
791	-0.0387072
792	0.309239
793	0.807231
794	0.0382775
795	0.191168
796	0.152672
797	0.41865
798	-0.342401
799	-0.0762486
800	-0.152672
801	-0.613029
802	0.574824
803	-0.26784
804	-0.57637
805	0.154024
806	-1.47289
807	-1.25738
808	-0.15829
809	-0.0792393
810	-2.48809
811	0.405516
812	0.886388
813	-0.200763
814	-0.241449
815	-0.201654
816	0.362684
817	0.401446
818	-0.200521
819	-1.17102
820	0.445796
821	-0.242915
822	-0.85488
823	-1.10998
824	0.0413309
825	0.576845
826	0.736802
827	0.650409
828	-0.243408
829	0.445796
830	1.08587
831	0.119928
832	-0.119928
833	-0.400802
834	0
835	0.0401526
836	-0.684796
837	-0.121335
838	0.564973
839	-0.0402495
840	-0.362977
841	-0.202225
842	0.926865
843	0.520105
844	-0.119784
845	-0.159936
846	-0.481349
847	-0.929112
848	-0.733201
849	0.326531
850	-1.60201
851	0.289436
852	-0.165289
853	-0.62228
854	0.249377
855	-0.332641
856	-1.72237
857	-0.254561
858	0.888143
859	0.294303
860	-0.843175
861	-0.296799
862	1.26584
863	-0.0419375
864	0
865	0.502093
866	0.66556
867	-0.124456
868	0.414251
869	0.0826446
870	-0.289556
871	0
872	0.413395
873	0.288363
874	0.205465
875	0.0820681
876	0.531807
877	-0.040808
878	-0.286123
879	-0.0819001
880	-0.988069
881	-0.373057
882	0.290276
883	0.124147
884	0.7006
885	-0.535311
886	-0.248037
887	0.124095
888	0.165221
889	0
890	-0.662528
891	0.166044
892	0.620221
893	0.943597
894	1.05606
895	0.362977
896	-0.241838
897	-0.404368
898	0.485045
899	-0.0806777
900	-0.121139
901	-0.121286
902	0.242424
903	-0.201979
904	-0.445796
905	-0.244002
906	-0.407997
907	-0.615134
908	-0.0823045
909	0.246711
910	-1.0735
911	-0.666391
912	-0.292949
913	-0.293809
914	-0.210394
915	-1.785
916	0.4279
917	0.596
918	-0.21245
919	0.254885
920	0.169563
921	0.169276
922	-1.01998
923	-1.16006
924	-1.87574
925	0.833155
926	0.479199
927	0.260417
928	-0.521514
929	-0.305477
930	1.38891
931	0.129227
932	0.0430385
933	0.257843
934	0.641713
935	0.17043
936	-0.597781
937	0.597781
938	0.424809
939	-0.46739
940	-0.384041
941	0.809031
942	0.169492
943	0.169205
944	-0.381114
945	0.465609
946	1.13375
947	0.790189
948	0.0828157
949	0.0413822
950	0.082713
951	0.453703
952	0.20555
953	-0.164406
954	-0.205888
955	0.123584
956	1.18684
957	-0.162866
958	0.487806
959	-0.61013
960	0.528994
961	-0.121827
962	0.202963
963	-1.18296
964	0.368626
965	0.326531
966	-0.654132
967	-0.534651
968	0.164813
969	0.451839
970	0.1638
971	-0.327869
972	0.573067
973	0.0815994
974	0.569339
975	0.404695
976	0.0807428
977	0.683695
978	0.0801282
979	0.04004
980	-0.120168
981	-0.321156
982	-0.1207
983	-0.241838
984	-0.0807428
985	-0.283114
986	0.0809717
987	1.00665
988	-0.0801603
989	0.20028
990	-0.160192
991	-0.764437
992	-0.283114
993	0.444535
994	-0.363563
995	-0.649617
996	0.851759
997	0.201735
998	0.562702
999	0.599402
