# Supplementary material for: Time-varying asymmetry and tail thickness in long series of daily financial returns
Source: publisher site journal article supplement (doi:10.1515/snde-2017-0071), 2018-10-02
Supplement: Supplementary file 27 [file l_1.xlsx]

## Sheet: 1
	Var1	Var2	Var3	Var4	Var5	Var6	Var7	Var8	Var9	Var10	Var11	Var12	Var13	Var14	Var15	Var16	Var17	Var18	Var19	Var20	Var21	Var22	Var23	Var24	Var25
1	0.00351018	0.0103394	0.015098	0.00895095	0.00791119	0.0474672	0.0163168	0.0213118	0.0141119	0.00815842	0.121832	0.0186478	0.0141119	0.365497	0.208855	0.0165758	0.059673	0.0281152	0.0435116	0.0101386	0.0291426	0.0614281	0.0175878	0.0132187	0.0227017
2	-0.095465	-0.094365	-0.093445	-0.09233	-0.09097	-0.0902	-0.08977	-0.089205	-0.08859	-0.08758	-0.08688	-0.08654	-0.08589	-0.0855	-0.085455	-0.085115	-0.084695	-0.08433	-0.08395	-0.083315	-0.082585	-0.082285	-0.081725	-0.080855	-0.08023
3	2	5	6	6	5	5	5	5	5	5	7	5	5	7	5	5	6	7	5	5	6	5	8	5	5
4	-0.09606	-0.09487	-0.09386	-0.09303	-0.09163	-0.09031	-0.09009	-0.08945	-0.08896	-0.08822	-0.08694	-0.08682	-0.08626	-0.08552	-0.08548	-0.08543	-0.0848	-0.08459	-0.08407	-0.08383	-0.0828	-0.08237	-0.0822	-0.08125	-0.08046
