# Supplementary material for: Time-varying asymmetry and tail thickness in long series of daily financial returns
Source: publisher site journal article supplement (doi:10.1515/snde-2017-0071), 2018-10-02
Supplement: Supplementary file 29 [file l_2.xlsx]

## Sheet: 1
	Var1	Var2	Var3	Var4	Var5	Var6
1	0.00805123	0.0020099	0.00110084	0.00461875	0.0254265	0
2	-0.113344	-0.110487	-0.103146	-0.0972726	-0.0961011	0
3	2	5	5	5	1	0
4	-0.113604	-0.113085	-0.107889	-0.0984031	-0.0961421	-0.09606
