# Supplementary material for: Time-varying asymmetry and tail thickness in long series of daily financial returns
Source: publisher site journal article supplement (doi:10.1515/snde-2017-0071), 2018-10-02
Supplement: Supplementary file 31 [file m1.xlsx]

## Sheet: 1
	Var1	Var2	Var3	Var4	Var5	Var6	Var7	Var8	Var9	Var10	Var11	Var12	Var13	Var14	Var15	Var16	Var17	Var18	Var19	Var20	Var21	Var22
1	0.0237462	0.318143	-3.30063	0.714816	1.80142	-0.136392	0.0309022	1.24183	1.6236	0.00194321	-0.128955	-0.0743509	-0.256139	0.0650055	0.366138	-0.0638156	0.488524	0.180551	-4.42189	-3.59378	-2.11397	-3.9987
