# Supplementary material for: Time-varying asymmetry and tail thickness in long series of daily financial returns
Source: publisher site journal article supplement (doi:10.1515/snde-2017-0071), 2018-10-02
Supplement: Supplementary file 33 [file m2.xlsx]

## Sheet: 1
	Var1	Var2	Var3	Var4	Var5	Var6	Var7	Var8	Var9	Var10	Var11	Var12	Var13	Var14	Var15	Var16	Var17	Var18	Var19	Var20	Var21	Var22
1	0.0237462	0.157733	0.0378189	0.714816	0.715406	0.466172	0.0309022	5.48216	7.11131	0.500618	-0.128955	-0.0743509	-0.256139	0.0650055	0.366138	-0.0638156	0.488524	0.180551	0.000904175	0.00162121	0.00414004	0.00464432
