# Supplementary material for: Time-varying asymmetry and tail thickness in long series of daily financial returns
Source: publisher site journal article supplement (doi:10.1515/snde-2017-0071), 2018-10-02
Supplement: Supplementary file 39 [file mq.xlsx]

## Sheet: 1
	quantile	delta	rho	alpha0	fi1	beta1	d	lambda1	ni1	ni2	a00	gamma_s0	gamma_s1	gamma_s2	gamma_s3	gamma_c0	gamma_c1	gamma_c2	gamma_c3	phi0	phi1	phi2	phi3
1	0.005	-0.02322	0.138757	0.014225	0.57311	0.62431	0.36455	-0.05184	4.6535	5.5793	0.481466	-1.6234	-0.7	-1.5038	-0.867	-0.214	-0.6844	-0.8453	-0.4844	0.0006237	0.0007887	0.00355995	0.004157
2	0.01	-0.01885	0.13995	0.01605	0.58763	0.63349	0.37295	-0.04306	4.7163	5.6918	0.483103	-1.5745	-0.6513	-1.4304	-0.8228	-0.1917	-0.6368	-0.8001	-0.4389	0.0006252	0.0008081	0.00357475	0.0041744
3	0.015	-0.01648	0.140552	0.017245	0.59696	0.64017	0.37769	-0.03674	4.7627	5.7936	0.484616	-1.5405	-0.6149	-1.3232	-0.7964	-0.1687	-0.6046	-0.753	-0.4146	0.0006265	0.0008164	0.0035867	0.0041859
4	0.02	-0.01464	0.141307	0.018425	0.60268	0.64564	0.38227	-0.03288	4.7957	5.8748	0.485463	-1.4732	-0.5921	-1.26	-0.7619	-0.1475	-0.584	-0.724	-0.397	0.0006275	0.000827	0.00359505	0.0041954
5	0.025	-0.01327	0.142004	0.01976	0.60791	0.65031	0.38598	-0.02962	4.8232	5.9268	0.486157	-1.3151	-0.5721	-1.208	-0.7289	-0.1332	-0.5648	-0.7001	-0.3851	0.0006289	0.0008479	0.0036027	0.0042041
6	0.03	-0.01206	0.142404	0.021795	0.61184	0.65414	0.38933	-0.02708	4.8493	5.9752	0.486637	-1.266	-0.5608	-1.1631	-0.6928	-0.1194	-0.5382	-0.6832	-0.3773	0.0006301	0.000866	0.0036099	0.0042097
7	0.035	-0.01082	0.142726	0.02335	0.61573	0.65701	0.39218	-0.02482	4.8692	6.0136	0.487144	-1.1324	-0.5492	-1.1068	-0.6773	-0.1089	-0.5235	-0.6618	-0.3665	0.000632	0.000877	0.00361545	0.0042151
8	0.04	-0.00983	0.143074	0.0241	0.61913	0.65939	0.39546	-0.02251	4.8867	6.0462	0.48758	-0.8338	-0.5372	-1.0719	-0.6568	-0.099	-0.5109	-0.6427	-0.3514	0.0006338	0.0008847	0.003621	0.0042201
9	0.045	-0.00891	0.143384	0.02476	0.62164	0.66146	0.39815	-0.02059	4.9037	6.0815	0.487914	-0.7853	-0.5272	-1.0478	-0.6371	-0.088	-0.5028	-0.6214	-0.3385	0.0006366	0.0008938	0.00362665	0.0042243
10	0.05	-0.00805	0.143776	0.02512	0.62421	0.66318	0.40019	-0.01873	4.9214	6.1089	0.488194	-0.7458	-0.5168	-1.0055	-0.6218	-0.0791	-0.4936	-0.6078	-0.327	0.0006394	0.0009095	0.0036324	0.0042283
11	0.055	-0.00721	0.144097	0.025495	0.6267	0.66473	0.40223	-0.0169	4.9377	6.1428	0.488522	-0.7083	-0.5085	-0.9557	-0.6099	-0.069	-0.4847	-0.5903	-0.3167	0.000644	0.0009215	0.00363785	0.0042318
12	0.06	-0.00642	0.144467	0.0259	0.62861	0.66648	0.40431	-0.01548	4.9527	6.1685	0.488879	-0.6848	-0.4991	-0.92	-0.599	-0.0601	-0.4777	-0.5582	-0.3103	0.0006469	0.0009298	0.00364225	0.0042355
13	0.065	-0.00561	0.144712	0.02617	0.63052	0.66821	0.40578	-0.01368	4.9666	6.1891	0.489126	-0.6607	-0.484	-0.8864	-0.5798	-0.0536	-0.47	-0.533	-0.3039	0.0006513	0.0009358	0.0036466	0.0042385
14	0.07	-0.00495	0.144955	0.026465	0.6325	0.66986	0.40721	-0.01222	4.9779	6.2102	0.489397	-0.6407	-0.4673	-0.8587	-0.5611	-0.0467	-0.462	-0.5169	-0.2971	0.0006545	0.0009424	0.00365155	0.0042414
15	0.075	-0.00418	0.145252	0.02675	0.63428	0.67125	0.40844	-0.01107	4.9866	6.23	0.489704	-0.6263	-0.4537	-0.8329	-0.5471	-0.0388	-0.4548	-0.5011	-0.2908	0.0006566	0.0009487	0.00365565	0.0042435
16	0.08	-0.00355	0.14549	0.027035	0.63616	0.67255	0.40972	-0.0097	4.9956	6.2472	0.489945	-0.6083	-0.4399	-0.8089	-0.536	-0.0318	-0.4479	-0.4896	-0.284	0.000659	0.0009536	0.0036599	0.0042463
17	0.085	-0.00294	0.14577	0.027275	0.63797	0.67396	0.41086	-0.00857	5.0054	6.2661	0.490178	-0.5932	-0.4277	-0.787	-0.5262	-0.0259	-0.4405	-0.4788	-0.2775	0.0006612	0.0009599	0.00366455	0.0042484
18	0.09	-0.00235	0.14598	0.027515	0.63953	0.67519	0.41226	-0.00753	5.0145	6.2839	0.490399	-0.581	-0.4184	-0.7698	-0.5165	-0.0195	-0.4345	-0.4671	-0.2717	0.0006632	0.0009648	0.0036694	0.0042506
19	0.095	-0.00183	0.146261	0.02781	0.64137	0.67625	0.41328	-0.00643	5.0242	6.3017	0.490618	-0.5705	-0.4084	-0.752	-0.5073	-0.0133	-0.4261	-0.4545	-0.264	0.0006656	0.0009704	0.0036741	0.0042531
20	0.1	-0.00122	0.146497	0.02806	0.64301	0.67734	0.41452	-0.00569	5.0332	6.3176	0.490835	-0.562	-0.3994	-0.7404	-0.4964	-0.0066	-0.4182	-0.4376	-0.2569	0.0006754	0.0009779	0.00367825	0.0042552
21	0.105	-0.00066	0.146714	0.028275	0.64441	0.67845	0.41564	-0.00489	5.0425	6.3332	0.491023	-0.553	-0.3925	-0.7275	-0.488	-0.0012	-0.4128	-0.4182	-0.2505	0.0006857	0.0009904	0.0036826	0.0042572
22	0.11	-0.00012	0.146982	0.02847	0.64607	0.67941	0.41672	-0.00394	5.0515	6.3486	0.491231	-0.5449	-0.385	-0.7172	-0.4798	0.0029	-0.4049	-0.4002	-0.2426	0.000694	0.0010145	0.0036872	0.0042595
23	0.115	0.00036	0.147249	0.028655	0.64751	0.68029	0.41777	-0.00303	5.0595	6.3616	0.49141	-0.5345	-0.3768	-0.7076	-0.4749	0.0068	-0.3974	-0.3809	-0.2347	0.000701	0.0010386	0.0036914	0.0042612
24	0.12	0.00084	0.147518	0.028865	0.6492	0.68113	0.41875	-0.00223	5.0683	6.3736	0.491586	-0.5238	-0.3703	-0.6976	-0.4681	0.0109	-0.3928	-0.3591	-0.2276	0.0007066	0.0010495	0.0036959	0.004263
25	0.125	0.00137	0.147761	0.02903	0.6505	0.68185	0.41972	-0.00161	5.0754	6.3902	0.491765	-0.5187	-0.3649	-0.6885	-0.462	0.0149	-0.3874	-0.3373	-0.2201	0.0007117	0.0010637	0.0037007	0.0042649
26	0.13	0.00185	0.14798	0.0292	0.6518	0.68262	0.42061	-0.00093	5.0832	6.406	0.491916	-0.5126	-0.3595	-0.6798	-0.4523	0.0192	-0.3816	-0.3129	-0.2142	0.0007192	0.0010736	0.00370625	0.0042668
27	0.135	0.00234	0.148216	0.02939	0.65303	0.68325	0.4216	-0.00042	5.0901	6.4187	0.492109	-0.5069	-0.3529	-0.6709	-0.4415	0.0248	-0.3761	-0.2935	-0.2084	0.0007265	0.0010846	0.0037121	0.0042685
28	0.14	0.00286	0.148439	0.02959	0.65422	0.68403	0.42243	0.00014	5.0974	6.4306	0.492288	-0.5019	-0.3478	-0.6614	-0.4314	0.0305	-0.3713	-0.2781	-0.2011	0.0007333	0.0010982	0.00371835	0.0042702
29	0.145	0.00328	0.148648	0.029765	0.65536	0.68488	0.42353	0.00072	5.1038	6.4427	0.492459	-0.4975	-0.3428	-0.6524	-0.4209	0.0348	-0.3666	-0.2654	-0.1948	0.0007376	0.001107	0.00372525	0.0042718
30	0.15	0.00372	0.148816	0.029915	0.65664	0.68562	0.42452	0.00129	5.1104	6.4572	0.492615	-0.4925	-0.339	-0.6419	-0.4137	0.0392	-0.3614	-0.2551	-0.188	0.0007406	0.0011152	0.00373415	0.0042733
31	0.155	0.00413	0.149037	0.03009	0.65788	0.68635	0.42532	0.00175	5.1179	6.471	0.492761	-0.4874	-0.335	-0.6296	-0.4045	0.0444	-0.3577	-0.2406	-0.1828	0.0007449	0.0011277	0.0037441	0.0042751
32	0.16	0.00459	0.149244	0.030225	0.65902	0.6871	0.42619	0.00224	5.1241	6.4816	0.492906	-0.4819	-0.3307	-0.6189	-0.3927	0.0487	-0.3539	-0.2266	-0.1779	0.0007492	0.0011421	0.0037548	0.0042765
33	0.165	0.005	0.149512	0.0304	0.66002	0.68805	0.42716	0.00268	5.1304	6.4935	0.493068	-0.475	-0.326	-0.6095	-0.3833	0.0537	-0.3503	-0.2146	-0.1726	0.0007547	0.0011539	0.0037732	0.0042781
34	0.17	0.00536	0.149731	0.03055	0.66113	0.68877	0.42802	0.00318	5.1361	6.5025	0.493227	-0.47	-0.3218	-0.6008	-0.376	0.0577	-0.3467	-0.2027	-0.1681	0.0007599	0.001167	0.00379295	0.0042798
35	0.175	0.00572	0.149924	0.030675	0.66208	0.68939	0.42887	0.00371	5.1431	6.5149	0.493402	-0.4662	-0.3172	-0.5922	-0.3684	0.0621	-0.343	-0.1908	-0.163	0.0007621	0.0011789	0.00381545	0.0042816
36	0.18	0.00609	0.150074	0.030815	0.66318	0.6902	0.4296	0.0043	5.148	6.5275	0.493501	-0.4608	-0.3126	-0.5829	-0.3615	0.0663	-0.3385	-0.1759	-0.1573	0.0007652	0.0011856	0.00385275	0.0042832
37	0.185	0.00648	0.150238	0.030955	0.66413	0.69081	0.43044	0.00486	5.1542	6.5398	0.493635	-0.4565	-0.3076	-0.5726	-0.3537	0.0701	-0.3346	-0.163	-0.1516	0.0007694	0.001192	0.00392055	0.0042849
38	0.19	0.00687	0.150395	0.03108	0.66518	0.69145	0.43111	0.0053	5.1596	6.5518	0.493767	-0.4512	-0.3026	-0.5623	-0.3451	0.0742	-0.3307	-0.1473	-0.1458	0.0007716	0.001198	0.0040251	0.0042867
39	0.195	0.00726	0.150557	0.03123	0.66614	0.69205	0.43178	0.00575	5.1655	6.5621	0.493902	-0.4473	-0.297	-0.5557	-0.3371	0.0783	-0.3261	-0.1356	-0.1399	0.0007743	0.001206	0.0040739	0.0042883
40	0.2	0.00761	0.150726	0.031355	0.66714	0.69267	0.43249	0.00622	5.1721	6.574	0.494035	-0.4428	-0.293	-0.5476	-0.3319	0.0829	-0.3221	-0.1172	-0.1331	0.000778	0.0012125	0.00409585	0.0042897
41	0.205	0.00793	0.150897	0.03149	0.66803	0.69326	0.43334	0.00685	5.1778	6.5847	0.494195	-0.4386	-0.2881	-0.5383	-0.3261	0.0881	-0.3177	-0.087	-0.1281	0.0007812	0.0012186	0.00411385	0.0042914
42	0.21	0.00822	0.151028	0.031605	0.66882	0.69384	0.43426	0.00732	5.184	6.5969	0.494325	-0.4346	-0.2845	-0.5303	-0.3209	0.0931	-0.3141	-0.0607	-0.121	0.0007844	0.0012273	0.00412715	0.0042932
43	0.215	0.0085	0.151198	0.031745	0.66967	0.69444	0.43498	0.00785	5.1899	6.6091	0.49444	-0.4311	-0.2813	-0.5229	-0.314	0.0985	-0.3098	-0.0338	-0.115	0.0007864	0.0012329	0.0041363	0.004295
44	0.22	0.00879	0.151343	0.031855	0.67054	0.69494	0.43567	0.00832	5.1949	6.6198	0.494559	-0.4269	-0.2782	-0.5171	-0.3069	0.1039	-0.3061	-0.0021	-0.1088	0.0007891	0.0012373	0.0041439	0.0042968
45	0.225	0.00909	0.151498	0.031985	0.67144	0.6955	0.4363	0.00874	5.2008	6.6323	0.49468	-0.4229	-0.2744	-0.5113	-0.3014	0.1091	-0.3028	0.0355	-0.1019	0.0007914	0.001244	0.0041506	0.0042988
46	0.23	0.00943	0.151633	0.032095	0.67233	0.69608	0.43715	0.00927	5.2058	6.6434	0.494823	-0.4182	-0.2712	-0.5043	-0.2951	0.1137	-0.2989	0.062	-0.0961	0.0007932	0.0012479	0.0041558	0.0043009
47	0.235	0.00979	0.151794	0.032225	0.67325	0.69662	0.43778	0.0098	5.2112	6.6522	0.494944	-0.4136	-0.2683	-0.4965	-0.289	0.1193	-0.2951	0.0798	-0.0897	0.0007955	0.0012529	0.0041611	0.0043033
48	0.24	0.0101	0.151929	0.032365	0.67426	0.69713	0.43833	0.0103	5.2163	6.663	0.495068	-0.4081	-0.2645	-0.4872	-0.2833	0.1251	-0.2922	0.1041	-0.0817	0.0007978	0.0012584	0.0041654	0.004305
49	0.245	0.01041	0.152108	0.03248	0.67515	0.69762	0.43915	0.01072	5.2216	6.6725	0.495196	-0.4033	-0.2614	-0.477	-0.277	0.1294	-0.2885	0.1235	-0.0748	0.0007997	0.0012659	0.00416975	0.0043071
50	0.25	0.01069	0.152244	0.0326	0.67598	0.69806	0.43978	0.01108	5.2266	6.6834	0.495339	-0.3979	-0.2583	-0.4682	-0.2696	0.1352	-0.2844	0.1404	-0.0693	0.0008016	0.0012725	0.00417285	0.0043092
51	0.255	0.01103	0.152398	0.03273	0.67682	0.69852	0.4404	0.01149	5.2324	6.6953	0.49546	-0.3925	-0.2552	-0.4602	-0.2622	0.1405	-0.2798	0.1639	-0.0643	0.0008031	0.0012779	0.0041763	0.0043121
52	0.26	0.01134	0.152597	0.03285	0.67763	0.69899	0.44099	0.0119	5.2374	6.7055	0.49558	-0.3875	-0.2521	-0.4528	-0.255	0.1464	-0.2751	0.1892	-0.059	0.0008053	0.0012856	0.00417955	0.0043151
53	0.265	0.0116	0.152792	0.03296	0.67854	0.69943	0.44163	0.01231	5.2429	6.7173	0.495672	-0.3822	-0.2493	-0.4458	-0.2476	0.1515	-0.2709	0.2135	-0.0552	0.0008082	0.0012933	0.00418195	0.0043186
54	0.27	0.01189	0.152961	0.033075	0.67937	0.69992	0.44232	0.01269	5.2473	6.7267	0.495785	-0.3789	-0.2464	-0.4398	-0.2408	0.1595	-0.2667	0.2473	-0.0507	0.0008105	0.0013016	0.0041839	0.0043217
55	0.275	0.01218	0.153105	0.033175	0.68024	0.70038	0.44291	0.01301	5.2522	6.7373	0.495902	-0.375	-0.2433	-0.4321	-0.2338	0.1649	-0.2624	0.279	-0.0463	0.000813	0.001308	0.0041865	0.0043259
56	0.28	0.01251	0.153227	0.03328	0.6811	0.70084	0.44364	0.01343	5.2574	6.7471	0.496026	-0.371	-0.239	-0.4261	-0.2254	0.17	-0.2578	0.3005	-0.0421	0.000815	0.0013138	0.0041888	0.0043297
57	0.285	0.01276	0.153367	0.033395	0.68199	0.70127	0.44426	0.01385	5.2625	6.7568	0.496158	-0.3673	-0.235	-0.4194	-0.2186	0.1764	-0.254	0.3195	-0.0382	0.0008178	0.0013187	0.00419075	0.0043348
58	0.29	0.01307	0.15351	0.03351	0.68277	0.7017	0.44491	0.01435	5.2678	6.7648	0.49624	-0.3638	-0.2315	-0.4148	-0.2113	0.1803	-0.2506	0.3353	-0.0335	0.0008196	0.0013241	0.0041926	0.0043411
59	0.295	0.01338	0.153622	0.03361	0.68363	0.70216	0.44554	0.01474	5.2722	6.7739	0.49637	-0.3597	-0.2275	-0.4096	-0.2049	0.1848	-0.2466	0.3492	-0.0287	0.0008224	0.0013292	0.00419415	0.004347
60	0.3	0.01368	0.153743	0.033715	0.68438	0.70259	0.44615	0.01514	5.2762	6.7818	0.496495	-0.3561	-0.2238	-0.4046	-0.1984	0.1891	-0.2423	0.3628	-0.0245	0.0008256	0.0013357	0.00419565	0.0043539
61	0.305	0.01397	0.153874	0.03383	0.6852	0.70303	0.4467	0.01558	5.2802	6.7912	0.496596	-0.3523	-0.2201	-0.3996	-0.193	0.1932	-0.2385	0.378	-0.0208	0.0008282	0.0013414	0.0041975	0.0043599
62	0.31	0.01421	0.154004	0.033945	0.686	0.70348	0.44723	0.01596	5.2846	6.8013	0.49673	-0.3476	-0.2162	-0.3955	-0.187	0.1971	-0.2343	0.3918	-0.017	0.0008303	0.0013456	0.004199	0.0043654
63	0.315	0.01448	0.154137	0.03405	0.6867	0.70391	0.44774	0.01633	5.2892	6.8105	0.496852	-0.343	-0.2132	-0.3904	-0.1801	0.2021	-0.2306	0.4015	-0.0137	0.0008323	0.0013515	0.0042004	0.0043714
64	0.32	0.01474	0.154255	0.034155	0.68759	0.70434	0.44835	0.01673	5.2946	6.8174	0.496978	-0.3381	-0.2101	-0.3857	-0.1748	0.2067	-0.2265	0.4116	-0.011	0.0008342	0.0013568	0.0042019	0.004376
65	0.325	0.01503	0.1544	0.034265	0.68845	0.70471	0.44888	0.01712	5.2996	6.8255	0.497088	-0.334	-0.2068	-0.3796	-0.1683	0.2109	-0.2222	0.4208	-0.007	0.0008365	0.0013652	0.00420335	0.0043806
66	0.33	0.0153	0.154526	0.034375	0.68922	0.70519	0.44948	0.01746	5.3039	6.8343	0.49719	-0.3292	-0.2035	-0.3748	-0.1605	0.2151	-0.2188	0.4289	-0.0031	0.0008381	0.0013729	0.00420465	0.0043855
67	0.335	0.01557	0.154627	0.03449	0.68999	0.70553	0.45005	0.01782	5.308	6.8421	0.497294	-0.3245	-0.1994	-0.3693	-0.1535	0.2189	-0.2154	0.4378	0.0007	0.0008398	0.0013823	0.00420575	0.0043896
68	0.34	0.01582	0.154752	0.034605	0.69067	0.70597	0.45054	0.01821	5.313	6.8503	0.497412	-0.3186	-0.1963	-0.3636	-0.1468	0.2231	-0.2123	0.4436	0.0059	0.0008418	0.0013891	0.004207	0.0043936
69	0.345	0.01606	0.154844	0.0347	0.6914	0.70635	0.45109	0.01861	5.3176	6.8562	0.497531	-0.314	-0.1933	-0.3592	-0.1416	0.2277	-0.2088	0.4514	0.0092	0.0008435	0.0013968	0.0042082	0.0043977
70	0.35	0.0163	0.154936	0.03481	0.69204	0.70672	0.45156	0.01897	5.3229	6.8649	0.497633	-0.309	-0.1902	-0.3549	-0.1354	0.2324	-0.2045	0.4567	0.0137	0.0008453	0.0014029	0.0042093	0.0044038
71	0.355	0.01656	0.155043	0.03492	0.69289	0.70709	0.45218	0.01938	5.3272	6.8735	0.497732	-0.3026	-0.1866	-0.3506	-0.1308	0.2373	-0.2011	0.4651	0.019	0.0008469	0.0014096	0.0042104	0.0044119
72	0.36	0.01684	0.155135	0.03502	0.69362	0.70748	0.45271	0.01977	5.331	6.8819	0.497834	-0.2978	-0.183	-0.346	-0.1254	0.2417	-0.1968	0.4702	0.0248	0.0008491	0.0014194	0.00421135	0.0044216
73	0.365	0.01709	0.155244	0.03512	0.69431	0.70782	0.45323	0.02013	5.3359	6.889	0.497921	-0.2924	-0.1796	-0.3407	-0.1201	0.2462	-0.1924	0.4766	0.0301	0.0008509	0.0014255	0.00421235	0.0044304
74	0.37	0.01732	0.155357	0.03523	0.695	0.70822	0.45375	0.02052	5.3415	6.8959	0.498004	-0.2871	-0.1754	-0.3361	-0.1147	0.2503	-0.1874	0.4836	0.0365	0.0008523	0.0014338	0.0042134	0.004439
75	0.375	0.01757	0.15548	0.03532	0.69565	0.70858	0.45424	0.02092	5.3463	6.9034	0.498103	-0.282	-0.1721	-0.331	-0.1083	0.2556	-0.1836	0.4905	0.0419	0.0008538	0.0014402	0.00421425	0.0044474
76	0.38	0.01779	0.155587	0.035415	0.6964	0.70899	0.45477	0.02126	5.3505	6.9116	0.498209	-0.2775	-0.1685	-0.3263	-0.1029	0.2609	-0.1795	0.4987	0.0476	0.0008551	0.0014484	0.0042152	0.0044578
77	0.385	0.01804	0.155704	0.035525	0.69717	0.70936	0.45533	0.0216	5.3544	6.9187	0.498298	-0.2721	-0.1653	-0.32	-0.0973	0.2658	-0.1753	0.5058	0.0522	0.0008567	0.0014564	0.0042162	0.0044687
78	0.39	0.01826	0.155829	0.035615	0.69795	0.7097	0.45585	0.02204	5.3594	6.9279	0.498405	-0.2668	-0.1623	-0.3163	-0.0895	0.2698	-0.1719	0.5149	0.0565	0.0008584	0.0014635	0.00421705	0.0044815
79	0.395	0.0185	0.155931	0.035705	0.69878	0.71006	0.45627	0.0224	5.3649	6.9352	0.498515	-0.2613	-0.1596	-0.3126	-0.0826	0.2739	-0.1681	0.5223	0.0614	0.0008601	0.0014728	0.0042179	0.0044918
80	0.4	0.01875	0.156044	0.035815	0.69952	0.71049	0.45683	0.02273	5.3688	6.9435	0.498612	-0.2562	-0.1568	-0.3088	-0.0762	0.2783	-0.1646	0.5287	0.066	0.0008614	0.0014802	0.00421865	0.0044993
81	0.405	0.01897	0.156145	0.03592	0.7002	0.71086	0.45729	0.02316	5.3732	6.9515	0.498697	-0.252	-0.1533	-0.3054	-0.0691	0.2849	-0.1614	0.5387	0.0704	0.0008627	0.001488	0.0042198	0.0045061
82	0.41	0.01921	0.15625	0.03601	0.70092	0.71118	0.4578	0.02354	5.3774	6.958	0.498776	-0.2473	-0.1503	-0.3016	-0.0628	0.2893	-0.1574	0.5449	0.0743	0.0008643	0.0014972	0.00422055	0.004512
83	0.415	0.01945	0.156361	0.03609	0.70157	0.71159	0.45839	0.02403	5.382	6.9661	0.498873	-0.2421	-0.1477	-0.297	-0.0564	0.2948	-0.1537	0.5504	0.0788	0.0008658	0.0015053	0.00422155	0.0045169
84	0.42	0.01969	0.156465	0.03619	0.70225	0.71193	0.45886	0.02441	5.3872	6.9728	0.498957	-0.2377	-0.1441	-0.2918	-0.0496	0.2989	-0.151	0.5569	0.0843	0.0008673	0.0015139	0.00422255	0.004521
85	0.425	0.01996	0.156568	0.03627	0.70293	0.71222	0.45931	0.02485	5.3909	6.9799	0.499066	-0.2336	-0.1411	-0.2844	-0.0448	0.3039	-0.1465	0.5634	0.0886	0.0008691	0.0015223	0.00422335	0.0045245
86	0.43	0.02019	0.156679	0.03636	0.7038	0.71261	0.45975	0.02529	5.3948	6.9884	0.499155	-0.2282	-0.1378	-0.2801	-0.0396	0.3083	-0.1423	0.5689	0.0929	0.0008711	0.0015316	0.0042243	0.0045278
87	0.435	0.02048	0.156798	0.03645	0.70465	0.71292	0.46021	0.02568	5.399	6.9965	0.49924	-0.2237	-0.1344	-0.2752	-0.0341	0.3132	-0.1385	0.5744	0.0971	0.0008727	0.0015395	0.0042252	0.0045309
88	0.44	0.02074	0.156903	0.03654	0.70531	0.71328	0.46065	0.0261	5.4032	7.0036	0.499326	-0.2178	-0.1315	-0.2697	-0.0278	0.3173	-0.1344	0.5808	0.1008	0.0008746	0.0015474	0.004226	0.0045337
89	0.445	0.02096	0.157007	0.03664	0.70599	0.71364	0.46108	0.02656	5.4076	7.0101	0.499422	-0.2125	-0.1285	-0.266	-0.021	0.322	-0.1305	0.5853	0.1047	0.0008766	0.0015574	0.00422685	0.0045364
90	0.45	0.0212	0.157102	0.036735	0.70678	0.71395	0.46159	0.02701	5.412	7.0179	0.4995	-0.2089	-0.1259	-0.2619	-0.0154	0.3271	-0.1265	0.5904	0.109	0.0008783	0.0015671	0.00422785	0.0045387
91	0.455	0.02143	0.1572	0.03684	0.70759	0.71428	0.46212	0.02736	5.4162	7.0245	0.499609	-0.2043	-0.1232	-0.257	-0.0112	0.331	-0.122	0.5955	0.1133	0.0008805	0.001575	0.0042288	0.0045409
92	0.46	0.02166	0.157303	0.03694	0.70827	0.71466	0.46257	0.0277	5.4201	7.0332	0.499694	-0.1997	-0.1208	-0.2522	-0.0065	0.3357	-0.1181	0.6007	0.1178	0.0008834	0.0015831	0.0042297	0.0045435
93	0.465	0.02191	0.157392	0.03703	0.70904	0.71498	0.46301	0.02812	5.4249	7.042	0.499799	-0.1954	-0.1179	-0.2464	-0.0019	0.3403	-0.1143	0.6054	0.1207	0.0008863	0.0015917	0.00423055	0.0045465
94	0.47	0.02214	0.157497	0.037125	0.70969	0.71536	0.46343	0.0285	5.43	7.0496	0.499893	-0.1905	-0.1155	-0.2424	0.003	0.3448	-0.1114	0.6107	0.1248	0.0008888	0.0016016	0.0042315	0.0045489
95	0.475	0.02235	0.157596	0.03722	0.71049	0.71574	0.4639	0.02891	5.4349	7.0565	0.499982	-0.1858	-0.1126	-0.2385	0.0072	0.349	-0.1082	0.616	0.1287	0.0008913	0.0016114	0.0042324	0.0045513
96	0.48	0.02258	0.157697	0.03732	0.71112	0.71601	0.46433	0.02927	5.4396	7.0643	0.500066	-0.181	-0.1098	-0.2342	0.0128	0.3544	-0.1045	0.6206	0.1326	0.0008931	0.0016217	0.0042332	0.0045541
97	0.485	0.02279	0.157801	0.0374	0.71174	0.71637	0.46481	0.02962	5.4435	7.0714	0.500161	-0.1759	-0.107	-0.2309	0.0174	0.3591	-0.101	0.6261	0.1368	0.000895	0.0016318	0.004234	0.004557
98	0.49	0.023	0.157903	0.037485	0.71244	0.71668	0.46527	0.03003	5.4481	7.0784	0.500242	-0.1704	-0.1043	-0.2263	0.0222	0.3633	-0.0982	0.632	0.142	0.0008976	0.0016456	0.00423505	0.0045597
99	0.495	0.02326	0.157995	0.037585	0.71312	0.71701	0.46582	0.03036	5.4534	7.086	0.500354	-0.1652	-0.1016	-0.222	0.0271	0.3678	-0.0946	0.6374	0.1466	0.0008998	0.0016606	0.00423605	0.0045628
100	0.5	0.02348	0.158098	0.037695	0.71373	0.71738	0.46632	0.03075	5.4586	7.0935	0.500457	-0.1602	-0.0981	-0.2187	0.033	0.3718	-0.0914	0.641	0.1508	0.0009018	0.0016737	0.004237	0.0045656
101	0.505	0.02367	0.158213	0.03779	0.7144	0.7177	0.46684	0.03107	5.463	7.1006	0.500543	-0.1551	-0.0953	-0.2149	0.0374	0.3759	-0.0877	0.6443	0.1554	0.000904	0.0016874	0.00423785	0.004569
102	0.51	0.02389	0.158335	0.037905	0.71513	0.71808	0.46722	0.03142	5.4682	7.1078	0.500642	-0.1505	-0.0928	-0.2107	0.0431	0.3796	-0.084	0.6482	0.1605	0.0009062	0.0016978	0.00423875	0.0045713
103	0.515	0.02412	0.15846	0.038	0.71572	0.71837	0.4677	0.03179	5.4727	7.1142	0.500735	-0.1459	-0.0898	-0.2053	0.0483	0.3833	-0.0811	0.6525	0.1643	0.0009094	0.0017079	0.0042395	0.0045741
104	0.52	0.02434	0.158564	0.038105	0.71648	0.7187	0.46812	0.03219	5.4769	7.1216	0.500827	-0.1405	-0.0875	-0.2014	0.0524	0.3875	-0.0784	0.6563	0.1696	0.000912	0.0017194	0.00424035	0.0045767
105	0.525	0.02458	0.158656	0.0382	0.71717	0.71907	0.46866	0.0326	5.4808	7.1304	0.500932	-0.1359	-0.0838	-0.1962	0.0577	0.3906	-0.0741	0.6603	0.1746	0.0009145	0.0017299	0.00424115	0.004579
106	0.53	0.02483	0.158781	0.038295	0.71787	0.71936	0.46911	0.03292	5.485	7.1378	0.50104	-0.1311	-0.0806	-0.1917	0.0631	0.3944	-0.0701	0.664	0.1793	0.0009169	0.0017396	0.004242	0.0045812
107	0.535	0.02506	0.158868	0.038395	0.71856	0.7197	0.46961	0.03331	5.4897	7.1448	0.501141	-0.1262	-0.0764	-0.1865	0.0678	0.3974	-0.0661	0.6682	0.1833	0.0009188	0.0017476	0.00424275	0.0045838
108	0.54	0.02534	0.158957	0.03849	0.7192	0.72011	0.47012	0.0337	5.4945	7.1524	0.501239	-0.1217	-0.0724	-0.1817	0.0734	0.4004	-0.0625	0.6718	0.1872	0.0009209	0.0017555	0.0042436	0.004587
109	0.545	0.02559	0.159054	0.038595	0.71983	0.72048	0.47059	0.03411	5.4988	7.1597	0.501325	-0.1164	-0.0683	-0.1776	0.0789	0.4035	-0.0592	0.6757	0.1909	0.0009228	0.001761	0.0042444	0.0045899
110	0.55	0.02582	0.15914	0.03869	0.72051	0.72082	0.47115	0.03445	5.5036	7.1678	0.501419	-0.1123	-0.0639	-0.1737	0.0835	0.4071	-0.0551	0.6799	0.1947	0.0009248	0.0017665	0.00424515	0.004593
111	0.555	0.02607	0.159231	0.03878	0.72128	0.72122	0.47163	0.03477	5.5076	7.1742	0.501521	-0.1072	-0.0595	-0.1697	0.0884	0.4103	-0.0509	0.6842	0.1984	0.0009264	0.0017705	0.00424615	0.0045952
112	0.56	0.02633	0.159323	0.0389	0.72202	0.72157	0.47219	0.03514	5.5123	7.1822	0.501611	-0.1033	-0.0551	-0.1661	0.0933	0.4134	-0.0463	0.6879	0.2022	0.0009283	0.0017746	0.00424675	0.004598
113	0.565	0.02658	0.159404	0.038975	0.72281	0.72194	0.47277	0.03552	5.5163	7.1896	0.501727	-0.0992	-0.0517	-0.1625	0.0989	0.417	-0.0412	0.6918	0.2061	0.0009297	0.0017801	0.0042474	0.0046008
114	0.57	0.02681	0.159488	0.0391	0.72347	0.72235	0.47323	0.03592	5.5208	7.1967	0.501824	-0.0945	-0.0485	-0.1573	0.1048	0.4212	-0.0366	0.6962	0.2114	0.0009311	0.0017844	0.0042482	0.0046038
115	0.575	0.02701	0.159591	0.039195	0.72422	0.72272	0.47364	0.03626	5.5255	7.2052	0.501947	-0.0884	-0.0444	-0.1531	0.1099	0.4246	-0.0326	0.7004	0.2167	0.0009326	0.0017887	0.0042488	0.0046072
116	0.58	0.0273	0.159681	0.0393	0.72501	0.72308	0.47412	0.03658	5.5303	7.2138	0.502043	-0.0825	-0.0403	-0.1499	0.1156	0.4279	-0.0284	0.7051	0.2213	0.0009344	0.0017934	0.0042497	0.0046112
117	0.585	0.02758	0.159768	0.039395	0.72575	0.72343	0.47464	0.03701	5.5351	7.2216	0.502144	-0.0776	-0.0362	-0.1451	0.1214	0.4314	-0.0245	0.7088	0.2256	0.0009366	0.0017972	0.00425055	0.0046148
118	0.59	0.02785	0.159874	0.0395	0.72642	0.72376	0.47516	0.03738	5.5404	7.2298	0.502252	-0.0714	-0.0324	-0.1413	0.1266	0.4353	-0.0208	0.7125	0.2304	0.0009383	0.001801	0.0042513	0.0046185
119	0.595	0.0281	0.159966	0.039605	0.72713	0.72413	0.4757	0.03767	5.5457	7.2371	0.502332	-0.0641	-0.029	-0.1376	0.1313	0.4391	-0.0169	0.7167	0.2349	0.0009398	0.0018047	0.00425205	0.0046223
120	0.6	0.0283	0.16006	0.03972	0.72788	0.72444	0.47617	0.03799	5.5498	7.2457	0.502439	-0.0563	-0.0253	-0.1343	0.1359	0.4437	-0.0133	0.7208	0.2404	0.0009413	0.0018081	0.0042528	0.0046257
121	0.605	0.02855	0.160162	0.039825	0.72872	0.72481	0.47671	0.03833	5.5548	7.2529	0.502561	-0.0472	-0.022	-0.131	0.1399	0.4468	-0.01	0.7255	0.2455	0.0009428	0.001811	0.00425365	0.004629
122	0.61	0.02878	0.160259	0.03994	0.72944	0.72518	0.47713	0.03872	5.5603	7.2616	0.502676	-0.0383	-0.0174	-0.1276	0.1444	0.4501	-0.0065	0.7308	0.2495	0.0009441	0.0018144	0.0042544	0.004631
123	0.615	0.02905	0.160349	0.040035	0.73017	0.72554	0.47764	0.03916	5.5656	7.2694	0.502776	-0.0276	-0.0134	-0.1242	0.149	0.4533	-0.003	0.7346	0.254	0.0009457	0.0018175	0.0042552	0.0046341
124	0.62	0.02931	0.160442	0.04014	0.7309	0.72594	0.47806	0.03953	5.5711	7.2777	0.502882	-0.0167	-0.0098	-0.1204	0.1565	0.4562	0.0005	0.7388	0.2587	0.0009476	0.0018202	0.00425575	0.0046378
125	0.625	0.02956	0.160532	0.040265	0.7316	0.72628	0.47852	0.03984	5.5761	7.2855	0.502986	-0.0078	-0.006	-0.1168	0.1629	0.4593	0.0044	0.7425	0.264	0.0009492	0.0018229	0.00425645	0.0046412
126	0.63	0.02981	0.160639	0.04037	0.73223	0.72663	0.47907	0.04025	5.5811	7.2946	0.503073	0.0044	-0.0009	-0.1128	0.1682	0.4628	0.0079	0.7463	0.2706	0.0009513	0.0018253	0.00425715	0.0046452
127	0.635	0.03003	0.160749	0.040455	0.73301	0.72696	0.47966	0.0407	5.5865	7.3031	0.503177	0.0108	0.0029	-0.1088	0.174	0.4674	0.0123	0.7514	0.2759	0.000953	0.0018277	0.004258	0.0046491
128	0.64	0.03029	0.160843	0.04055	0.73371	0.72729	0.48011	0.04107	5.5909	7.3114	0.503307	0.0185	0.0078	-0.1057	0.1795	0.4716	0.0182	0.756	0.2821	0.0009553	0.0018305	0.0042586	0.0046544
129	0.645	0.03056	0.160938	0.04066	0.73443	0.72764	0.48067	0.04153	5.5955	7.3197	0.503385	0.0265	0.0126	-0.1022	0.1847	0.4752	0.0232	0.7607	0.288	0.0009575	0.0018328	0.00425935	0.0046606
130	0.65	0.03088	0.161028	0.040775	0.73526	0.728	0.48118	0.04192	5.5998	7.3285	0.50349	0.0367	0.0161	-0.0988	0.19	0.4784	0.0296	0.7644	0.2936	0.0009594	0.001836	0.0042601	0.0046665
131	0.655	0.03119	0.16112	0.040885	0.73607	0.72837	0.48178	0.04239	5.6052	7.3391	0.50361	0.0478	0.0206	-0.0951	0.1953	0.4819	0.0356	0.7685	0.2994	0.0009612	0.0018383	0.0042608	0.0046731
132	0.66	0.03149	0.161218	0.04099	0.73687	0.72876	0.48236	0.04274	5.61	7.3492	0.503718	0.0596	0.0244	-0.0903	0.2006	0.4848	0.0412	0.7731	0.305	0.0009632	0.0018412	0.0042614	0.0046798
133	0.665	0.03181	0.161322	0.04111	0.73764	0.72915	0.48292	0.04315	5.6152	7.3566	0.503833	0.0707	0.0288	-0.085	0.2076	0.4877	0.0456	0.7773	0.3106	0.0009652	0.0018439	0.0042621	0.0046871
134	0.67	0.03211	0.16143	0.041225	0.73838	0.7295	0.48347	0.04357	5.6202	7.366	0.503926	0.0806	0.0346	-0.0795	0.2145	0.4906	0.0508	0.7837	0.3166	0.0009673	0.0018461	0.00426295	0.0046933
135	0.675	0.03237	0.161547	0.04132	0.73915	0.72992	0.48406	0.04409	5.6252	7.3747	0.504014	0.0894	0.0397	-0.0734	0.2206	0.4937	0.056	0.7885	0.3221	0.0009694	0.0018486	0.0042637	0.0047011
136	0.68	0.03265	0.161667	0.04144	0.73976	0.73028	0.48459	0.04448	5.6303	7.3815	0.504122	0.0963	0.0444	-0.0683	0.2283	0.4983	0.062	0.7952	0.3284	0.0009716	0.0018514	0.0042644	0.0047085
137	0.685	0.03294	0.161762	0.041555	0.74056	0.73067	0.48513	0.04491	5.6355	7.3885	0.504255	0.1039	0.0488	-0.0628	0.2349	0.5014	0.0677	0.8011	0.3365	0.0009743	0.0018544	0.00426495	0.0047153
138	0.69	0.03319	0.161874	0.041655	0.74149	0.73096	0.48566	0.04537	5.6414	7.3971	0.504357	0.1128	0.0533	-0.0584	0.2406	0.5051	0.0729	0.8051	0.3432	0.0009766	0.001857	0.0042657	0.0047225
139	0.695	0.03344	0.161976	0.04177	0.74219	0.73126	0.48616	0.04585	5.6469	7.4053	0.504465	0.1227	0.0582	-0.0535	0.2463	0.5077	0.0777	0.8105	0.3514	0.0009786	0.0018594	0.00426635	0.0047293
140	0.7	0.03374	0.162083	0.04191	0.74304	0.73163	0.4867	0.04625	5.6511	7.4147	0.504573	0.1295	0.0625	-0.0487	0.2532	0.5108	0.0817	0.8155	0.3583	0.0009809	0.0018626	0.00426685	0.0047365
141	0.705	0.03399	0.162186	0.042035	0.74401	0.73196	0.48731	0.04671	5.6561	7.4234	0.504678	0.1365	0.0679	-0.0438	0.2594	0.5139	0.0855	0.8201	0.3658	0.0009827	0.0018662	0.0042676	0.0047456
142	0.71	0.03429	0.162309	0.04213	0.74503	0.73233	0.48783	0.04719	5.6625	7.4318	0.504784	0.1442	0.0736	-0.0373	0.2649	0.5178	0.0889	0.8257	0.373	0.0009852	0.0018689	0.0042682	0.0047558
143	0.715	0.03461	0.162423	0.042275	0.74597	0.73273	0.48841	0.04761	5.6679	7.4404	0.504893	0.1517	0.079	-0.0316	0.2711	0.5221	0.0924	0.8299	0.3817	0.0009877	0.0018717	0.00426895	0.0047714
144	0.72	0.03489	0.162526	0.042385	0.74686	0.73308	0.48901	0.04797	5.6737	7.4518	0.504999	0.1596	0.0837	-0.0246	0.2781	0.527	0.0962	0.8345	0.3896	0.00099	0.0018742	0.0042697	0.0047854
145	0.725	0.03519	0.162661	0.042495	0.74796	0.73345	0.48952	0.04844	5.6794	7.4616	0.505116	0.1659	0.0892	-0.0172	0.2863	0.5319	0.1	0.8398	0.3975	0.0009927	0.0018774	0.00427035	0.004804
146	0.73	0.03552	0.162774	0.042615	0.74876	0.73391	0.49001	0.04885	5.6849	7.4715	0.50523	0.1728	0.094	-0.0101	0.2924	0.5373	0.104	0.8444	0.4077	0.000995	0.0018802	0.00427105	0.0048242
147	0.735	0.03577	0.162889	0.042755	0.74957	0.73425	0.49056	0.04927	5.691	7.4803	0.505344	0.1783	0.0987	-0.0044	0.299	0.5424	0.1088	0.8498	0.4137	0.0009979	0.0018824	0.00427175	0.0048406
148	0.74	0.03607	0.162986	0.04288	0.75061	0.73464	0.49111	0.04974	5.697	7.4886	0.505468	0.1844	0.1046	0.0034	0.3057	0.5469	0.115	0.855	0.4195	0.0010004	0.0018855	0.0042724	0.0048586
149	0.745	0.03638	0.163096	0.043	0.75145	0.73505	0.49182	0.05014	5.7037	7.4979	0.505586	0.1934	0.1094	0.0102	0.3109	0.5506	0.1225	0.8604	0.4243	0.0010027	0.0018879	0.004273	0.0048738
150	0.75	0.03668	0.163195	0.043125	0.75236	0.73546	0.49262	0.05078	5.7095	7.5086	0.505684	0.2005	0.1147	0.0157	0.3167	0.555	0.1284	0.8664	0.4295	0.0010053	0.0018911	0.00427365	0.0048895
151	0.755	0.037	0.163288	0.04324	0.7533	0.73583	0.49326	0.05131	5.716	7.5196	0.505793	0.2081	0.1187	0.0237	0.322	0.5607	0.1355	0.8722	0.4347	0.0010074	0.0018943	0.00427435	0.0049046
152	0.76	0.03734	0.163398	0.043345	0.75417	0.73618	0.49387	0.05178	5.723	7.5287	0.505916	0.2168	0.1237	0.0304	0.329	0.5677	0.1429	0.8771	0.4405	0.0010103	0.0018975	0.00427505	0.0049257
153	0.765	0.03767	0.163505	0.04347	0.75514	0.73653	0.4945	0.05226	5.7299	7.5387	0.506052	0.2236	0.1284	0.038	0.3346	0.5732	0.1488	0.8814	0.4466	0.0010131	0.0019008	0.00427575	0.0049461
154	0.77	0.038	0.163603	0.04362	0.75607	0.73692	0.49515	0.05273	5.7369	7.5475	0.506159	0.2295	0.1331	0.045	0.3424	0.5786	0.1543	0.8875	0.4516	0.0010158	0.0019039	0.0042766	0.0049704
155	0.775	0.0383	0.163705	0.043725	0.75725	0.73735	0.49587	0.0532	5.743	7.5587	0.506286	0.2347	0.1375	0.0523	0.3508	0.5844	0.1597	0.8934	0.4567	0.0010184	0.0019074	0.0042773	0.0049938
156	0.78	0.03864	0.163841	0.04388	0.7582	0.7378	0.49656	0.05368	5.7497	7.5683	0.506423	0.2406	0.1414	0.0624	0.3604	0.5894	0.1659	0.8985	0.4619	0.0010206	0.001911	0.004278	0.0050167
157	0.785	0.03893	0.163967	0.044025	0.75914	0.73819	0.49711	0.05417	5.7546	7.5791	0.506561	0.2483	0.1454	0.071	0.3707	0.5966	0.1725	0.9034	0.4699	0.0010228	0.0019146	0.0042788	0.0050399
158	0.79	0.0392	0.164125	0.044175	0.76008	0.73867	0.49779	0.05471	5.7614	7.591	0.506694	0.2561	0.1502	0.0774	0.3813	0.6027	0.1788	0.9085	0.4786	0.0010257	0.001919	0.00427955	0.005061
159	0.795	0.03948	0.164266	0.04432	0.76126	0.73912	0.49839	0.05519	5.7687	7.602	0.506798	0.2628	0.1548	0.083	0.3904	0.6093	0.185	0.9131	0.4864	0.0010284	0.0019228	0.0042804	0.0050734
160	0.8	0.03974	0.164411	0.044465	0.76227	0.73952	0.49917	0.05573	5.7764	7.6134	0.506937	0.269	0.1604	0.0883	0.3989	0.6151	0.1917	0.9181	0.4935	0.0010319	0.0019273	0.00428115	0.0050864
161	0.805	0.04008	0.164556	0.044655	0.76341	0.73993	0.49979	0.05632	5.7838	7.626	0.507095	0.2752	0.1659	0.0949	0.407	0.6211	0.1983	0.9234	0.5032	0.0010354	0.0019314	0.00428185	0.0050973
162	0.81	0.04037	0.164694	0.044805	0.76449	0.7404	0.50055	0.05698	5.7909	7.6395	0.50723	0.2817	0.1716	0.1	0.4143	0.6274	0.2045	0.9286	0.5105	0.001038	0.0019361	0.00428265	0.005108
163	0.815	0.04077	0.164841	0.04496	0.76544	0.7408	0.5012	0.05754	5.7985	7.6514	0.507378	0.2915	0.177	0.1065	0.4213	0.6342	0.2126	0.9348	0.5164	0.0010407	0.0019406	0.0042834	0.0051174
164	0.82	0.04112	0.165007	0.04511	0.76631	0.7413	0.502	0.05823	5.8065	7.6659	0.507517	0.2985	0.1819	0.1137	0.4279	0.6394	0.2197	0.9406	0.5226	0.0010436	0.0019452	0.00428425	0.0051254
165	0.825	0.04147	0.165133	0.04527	0.76748	0.74178	0.5028	0.05905	5.8136	7.6797	0.507679	0.306	0.1861	0.1195	0.4361	0.6437	0.2251	0.9483	0.53	0.0010463	0.0019518	0.0042849	0.0051324
166	0.83	0.04191	0.165261	0.04544	0.76842	0.74233	0.50356	0.05981	5.822	7.6913	0.50784	0.3112	0.1902	0.1243	0.4438	0.6502	0.2309	0.957	0.5378	0.001049	0.0019592	0.00428575	0.0051391
167	0.835	0.04231	0.165393	0.045605	0.76939	0.74273	0.50417	0.06046	5.8303	7.7055	0.507974	0.3178	0.1955	0.1306	0.4508	0.6558	0.2384	0.9647	0.5448	0.0010517	0.0019672	0.0042865	0.0051467
168	0.84	0.04267	0.165527	0.04576	0.77065	0.7432	0.505	0.06119	5.8396	7.7198	0.508123	0.324	0.2011	0.1377	0.4584	0.6623	0.2457	0.973	0.55	0.0010547	0.0019756	0.0042873	0.0051556
169	0.845	0.04308	0.165686	0.045915	0.7717	0.74372	0.50577	0.06187	5.8478	7.7365	0.508284	0.3325	0.2064	0.1433	0.4655	0.6697	0.253	0.9792	0.5558	0.0010572	0.0019871	0.0042882	0.0051632
170	0.85	0.04346	0.165804	0.04607	0.77293	0.74424	0.5065	0.06262	5.8557	7.7517	0.508442	0.3415	0.2128	0.15	0.4725	0.6757	0.2609	0.9886	0.5625	0.0010602	0.0019969	0.00428915	0.005173
171	0.855	0.0439	0.165955	0.046255	0.77405	0.74487	0.50734	0.06327	5.8644	7.7661	0.508584	0.3503	0.2186	0.1572	0.4796	0.6824	0.2713	0.9976	0.5731	0.0010636	0.0020074	0.0042899	0.0051824
172	0.86	0.04425	0.166165	0.04645	0.77546	0.74546	0.50803	0.06399	5.8738	7.7822	0.508759	0.358	0.2237	0.1641	0.4875	0.6884	0.2817	1.0066	0.582	0.0010681	0.0020254	0.0042908	0.0051919
173	0.865	0.0447	0.166357	0.04661	0.7768	0.7461	0.5088	0.06486	5.8841	7.7989	0.508921	0.3645	0.2299	0.1718	0.4993	0.696	0.2894	1.0145	0.5905	0.0010721	0.0020456	0.0042917	0.0052002
174	0.87	0.04517	0.166576	0.046805	0.77823	0.74676	0.50967	0.06562	5.8937	7.8133	0.509112	0.3739	0.2356	0.1817	0.5113	0.7023	0.2963	1.021	0.6006	0.0010753	0.0020645	0.0042926	0.0052084
175	0.875	0.04562	0.166746	0.04702	0.77961	0.74738	0.51063	0.06647	5.9038	7.8286	0.50932	0.3836	0.2416	0.1877	0.5231	0.7081	0.3045	1.032	0.607	0.0010783	0.0020836	0.0042936	0.0052161
176	0.88	0.04611	0.166914	0.047235	0.78081	0.74798	0.51174	0.06751	5.915	7.8465	0.509513	0.3916	0.247	0.1946	0.5345	0.716	0.3127	1.0433	0.6154	0.0010815	0.0021034	0.00429455	0.0052224
177	0.885	0.04662	0.167115	0.04747	0.78228	0.74863	0.51287	0.06844	5.9266	7.8656	0.509693	0.3995	0.2549	0.2005	0.5462	0.7238	0.3236	1.0526	0.6252	0.0010847	0.0021213	0.00429575	0.0052298
178	0.89	0.04713	0.167356	0.047685	0.78387	0.74931	0.51384	0.06912	5.9359	7.8854	0.509889	0.4086	0.2623	0.2065	0.5575	0.7319	0.3318	1.062	0.6337	0.0010874	0.0021354	0.0042967	0.0052376
179	0.895	0.04768	0.167603	0.047885	0.78565	0.75005	0.51489	0.06988	5.9466	7.9065	0.510117	0.4163	0.2716	0.2151	0.5709	0.7441	0.3436	1.071	0.6428	0.0010917	0.0021477	0.0042976	0.0052447
180	0.9	0.0482	0.167886	0.048135	0.78736	0.75079	0.51587	0.07079	5.9578	7.926	0.510343	0.4256	0.2787	0.22	0.5874	0.7583	0.3548	1.0793	0.6555	0.0010962	0.0021649	0.0042989	0.0052521
181	0.905	0.04873	0.168136	0.048355	0.78894	0.7516	0.51749	0.07162	5.9726	7.9461	0.510609	0.4357	0.2853	0.2266	0.6043	0.7722	0.3654	1.0894	0.6661	0.0010998	0.0021886	0.00430005	0.005258
182	0.91	0.04938	0.168416	0.04861	0.79036	0.75249	0.51877	0.07246	5.9868	7.969	0.510873	0.449	0.2929	0.2327	0.633	0.7812	0.373	1.1036	0.6756	0.0011034	0.0022373	0.00430145	0.0052628
183	0.915	0.05005	0.168741	0.048905	0.7923	0.75342	0.52009	0.07342	6.0005	7.9924	0.511102	0.4591	0.3014	0.2381	0.663	0.7916	0.3823	1.1222	0.6853	0.0011087	0.0022874	0.00430295	0.0052684
184	0.92	0.05067	0.169011	0.049165	0.79449	0.75434	0.52137	0.07444	6.015	8.0128	0.511398	0.4692	0.3084	0.2423	0.7085	0.805	0.3909	1.1404	0.6943	0.0011136	0.0023134	0.004304	0.0052738
185	0.925	0.0514	0.169276	0.04943	0.79634	0.75525	0.52282	0.07539	6.0323	8.0386	0.511663	0.4852	0.3172	0.2493	0.7348	0.8164	0.3989	1.1611	0.7069	0.0011201	0.002331	0.0043056	0.0052795
186	0.93	0.05226	0.169696	0.04973	0.79832	0.75622	0.52417	0.07638	6.0506	8.0609	0.511967	0.5002	0.3245	0.257	0.7605	0.8252	0.4097	1.1881	0.7226	0.0011261	0.002353	0.00430715	0.0052848
187	0.935	0.05318	0.170049	0.05007	0.8005	0.75734	0.52574	0.0775	6.0662	8.0892	0.512245	0.5153	0.3337	0.2646	0.8152	0.8337	0.4182	1.2112	0.7352	0.0011312	0.0023939	0.0043089	0.0052904
188	0.94	0.054	0.170408	0.050415	0.80329	0.75835	0.52739	0.07867	6.0853	8.1138	0.512591	0.5308	0.3452	0.2728	0.8601	0.8461	0.428	1.2344	0.7442	0.0011373	0.0024282	0.0043105	0.0052973
189	0.945	0.05495	0.170746	0.050785	0.80588	0.75943	0.52913	0.07991	6.1048	8.1443	0.51297	0.5474	0.3613	0.2806	0.9386	0.8549	0.4389	1.2514	0.7533	0.0011463	0.0024503	0.0043124	0.0053032
190	0.95	0.05587	0.171064	0.051105	0.8094	0.76053	0.53128	0.08101	6.1251	8.1858	0.513336	0.5649	0.3742	0.2902	1.0236	0.8661	0.4536	1.2681	0.7673	0.0011538	0.0024764	0.00431385	0.0053095
191	0.955	0.05694	0.17142	0.05154	0.81294	0.76178	0.53329	0.08237	6.1478	8.2221	0.513806	0.5861	0.3893	0.3006	1.1405	0.8804	0.4649	1.2814	0.783	0.0011618	0.0024914	0.00431605	0.0053167
192	0.96	0.05803	0.171876	0.051975	0.8166	0.7632	0.53588	0.08376	6.1749	8.2643	0.514359	0.6057	0.4068	0.3115	1.1991	0.8954	0.4827	1.2966	0.8069	0.0011689	0.0025054	0.00431805	0.0053249
193	0.965	0.05947	0.172213	0.05242	0.82145	0.7647	0.53886	0.08507	6.2035	8.3127	0.515013	0.6243	0.4358	0.3241	1.2847	0.9122	0.5073	1.3106	0.82	0.0011766	0.0025235	0.00432075	0.0053346
194	0.97	0.06112	0.172626	0.05297	0.82661	0.76616	0.54224	0.08663	6.2403	8.3576	0.515906	0.6574	0.4615	0.3394	1.3385	0.9286	0.5326	1.3254	0.8316	0.0011876	0.002537	0.00432345	0.0053459
195	0.975	0.063	0.173143	0.0536	0.83232	0.768	0.54636	0.08897	6.279	8.4249	0.516744	0.6764	0.4848	0.3565	1.3774	0.9408	0.5541	1.3474	0.8634	0.0011989	0.002555	0.0043265	0.0053617
196	0.98	0.065	0.173719	0.054415	0.83801	0.76989	0.55012	0.09138	6.3232	8.5061	0.517634	0.7112	0.5105	0.376	1.3985	0.9584	0.5752	1.3845	0.8907	0.0012113	0.0025842	0.00432955	0.0053876
197	0.985	0.06787	0.174647	0.05561	0.84588	0.7725	0.55508	0.09401	6.3899	8.6058	0.5184	0.7736	0.5557	0.395	1.429	1.002	0.5986	1.4228	0.9325	0.0012319	0.0026139	0.00433505	0.0054307
198	0.99	0.07132	0.175557	0.05728	0.85574	0.77544	0.56298	0.09855	6.4749	8.708	0.52008	0.8136	0.6073	0.4215	1.5354	1.0598	0.633	1.4768	0.9972	0.0012935	0.0026375	0.00434	0.0054943
199	0.995	0.07531	0.177518	0.05967	0.86864	0.78015	0.57623	0.10329	6.6125	9.0005	0.522188	0.8677	0.7022	0.4744	1.609	1.1387	0.6833	1.5052	1.0923	0.0014181	0.0026632	0.0043527	0.0056009
200	1	0	0	0	0	0	0	0	0	0	0	0	0	0	0	0	0	0	0	0	0	0	0
201	1.005	0	0	0	0	0	0	0	0	0	0	0	0	0	0	0	0	0	0	0	0	0	0
