# Supplementary material for: Time-varying asymmetry and tail thickness in long series of daily financial returns
Source: publisher site journal article supplement (doi:10.1515/snde-2017-0071), 2018-10-02
Supplement: Supplementary file 41 [file mq_add.xlsx]

## Sheet: 1
	quantile	(a1+a2)/2+b1	a0/[1-(a1+a2)/2-b1]	[a0/(1-(a1+a2)/2-b1)]^0.5	alpha1/alpha2	ni2/ni1
1	0.005	0.988038	0.5265	0.7255	3.4495	0.9984
2	0.01	0.988676	0.5455	0.7386	3.571	1.0293
3	0.015	0.989073	0.557	0.7464	3.6515	1.0486
4	0.02	0.989346	0.566	0.7524	3.7145	1.0639
5	0.025	0.989564	0.5735	0.7573	3.766	1.0752
6	0.03	0.989743	0.5795	0.7615	3.8105	1.0855
7	0.035	0.98989	0.5855	0.7653	3.8485	1.0945
8	0.04	0.990017	0.591	0.7687	3.885	1.1028
9	0.045	0.990134	0.5955	0.7719	3.918	1.1101
10	0.05	0.990242	0.6005	0.7749	3.95	1.1172
11	0.055	0.990342	0.6045	0.7777	3.979	1.1239
12	0.06	0.990438	0.6085	0.7803	4.006	1.1302
13	0.065	0.990529	0.6125	0.7827	4.03	1.1362
14	0.07	0.99061	0.616	0.7851	4.054	1.142
15	0.075	0.990687	0.6195	0.7873	4.0765	1.1476
16	0.08	0.99076	0.623	0.7894	4.099	1.1526
17	0.085	0.990828	0.6265	0.7915	4.121	1.1575
18	0.09	0.990894	0.6295	0.7936	4.1415	1.1621
19	0.095	0.99096	0.633	0.7957	4.1605	1.1668
20	0.1	0.991021	0.636	0.7976	4.1795	1.171
21	0.105	0.991081	0.639	0.7995	4.199	1.1754
22	0.11	0.991136	0.642	0.8015	4.2175	1.1795
23	0.115	0.991193	0.645	0.8033	4.234	1.1836
24	0.12	0.991245	0.648	0.8051	4.251	1.1875
25	0.125	0.991298	0.651	0.8068	4.2675	1.1915
26	0.13	0.991349	0.6535	0.8085	4.284	1.1953
27	0.135	0.9914	0.656	0.8101	4.3005	1.1991
28	0.14	0.991447	0.6585	0.8117	4.3165	1.2027
29	0.145	0.991495	0.661	0.8132	4.332	1.2061
30	0.15	0.99154	0.6635	0.8147	4.3475	1.2094
31	0.155	0.991584	0.666	0.8162	4.363	1.213
32	0.16	0.991629	0.6685	0.8176	4.377	1.2162
33	0.165	0.991671	0.6705	0.8191	4.3915	1.2195
34	0.17	0.991712	0.673	0.8205	4.406	1.2227
35	0.175	0.991751	0.6755	0.822	4.4205	1.2257
36	0.18	0.991791	0.6775	0.8233	4.4345	1.2287
37	0.185	0.991832	0.68	0.8247	4.448	1.2318
38	0.19	0.991871	0.682	0.826	4.462	1.2346
39	0.195	0.991909	0.6845	0.8274	4.4755	1.2376
40	0.2	0.991947	0.687	0.8288	4.489	1.2406
41	0.205	0.991983	0.689	0.8302	4.502	1.2434
42	0.21	0.992018	0.6915	0.8315	4.516	1.2463
43	0.215	0.992054	0.6935	0.8329	4.5285	1.2491
44	0.22	0.992089	0.696	0.8342	4.541	1.2518
45	0.225	0.992124	0.698	0.8355	4.554	1.2546
46	0.23	0.992159	0.7	0.8368	4.566	1.2572
47	0.235	0.992193	0.7025	0.8381	4.5785	1.2601
48	0.24	0.992228	0.7045	0.8394	4.591	1.2629
49	0.245	0.992261	0.7065	0.8406	4.6035	1.2656
50	0.25	0.992295	0.7085	0.8419	4.6155	1.2681
51	0.255	0.992328	0.7105	0.8431	4.6275	1.2707
52	0.26	0.992361	0.713	0.8444	4.6395	1.2734
53	0.265	0.992393	0.715	0.8457	4.6515	1.2759
54	0.27	0.992425	0.717	0.8469	4.664	1.2785
55	0.275	0.992457	0.7195	0.8482	4.676	1.281
56	0.28	0.992488	0.7215	0.8495	4.688	1.2836
57	0.285	0.992519	0.7235	0.8507	4.7	1.2859
58	0.29	0.99255	0.7255	0.8519	4.712	1.2883
59	0.295	0.992581	0.7275	0.853	4.7235	1.2906
60	0.3	0.99261	0.7295	0.8542	4.736	1.2931
61	0.305	0.992639	0.7315	0.8555	4.7475	1.2955
62	0.31	0.992667	0.734	0.8567	4.7595	1.2979
63	0.315	0.992696	0.736	0.8579	4.771	1.3003
64	0.32	0.992724	0.738	0.8591	4.7825	1.3026
65	0.325	0.992752	0.74	0.8604	4.7945	1.305
66	0.33	0.99278	0.742	0.8616	4.806	1.3073
67	0.335	0.992809	0.744	0.8628	4.8175	1.3097
68	0.34	0.992837	0.7465	0.864	4.829	1.3119
69	0.345	0.992864	0.7485	0.8651	4.841	1.3142
70	0.35	0.992892	0.7505	0.8664	4.8525	1.3165
71	0.355	0.992919	0.7525	0.8676	4.8635	1.3189
72	0.36	0.992946	0.7545	0.8688	4.875	1.3211
73	0.365	0.992973	0.7565	0.87	4.8865	1.3235
74	0.37	0.993	0.759	0.8712	4.8985	1.3257
75	0.375	0.993027	0.761	0.8724	4.9095	1.3279
76	0.38	0.993053	0.763	0.8736	4.9205	1.3302
77	0.385	0.99308	0.765	0.8747	4.932	1.3325
78	0.39	0.993106	0.767	0.8759	4.9435	1.3348
79	0.395	0.993132	0.7695	0.8772	4.9555	1.3371
80	0.4	0.993158	0.7715	0.8785	4.9665	1.3393
81	0.405	0.993183	0.7735	0.8797	4.9785	1.3416
82	0.41	0.993207	0.776	0.881	4.99	1.3439
83	0.415	0.993234	0.778	0.8823	5.001	1.3462
84	0.42	0.993259	0.7805	0.8835	5.0125	1.3484
85	0.425	0.993284	0.7825	0.8848	5.024	1.3507
86	0.43	0.99331	0.785	0.8861	5.0355	1.3529
87	0.435	0.993335	0.7875	0.8874	5.047	1.3551
88	0.44	0.99336	0.7895	0.8886	5.0585	1.3573
89	0.445	0.993384	0.7915	0.8899	5.0705	1.3595
90	0.45	0.99341	0.794	0.8912	5.082	1.3617
91	0.455	0.993434	0.796	0.8924	5.094	1.3638
92	0.46	0.99346	0.7985	0.8937	5.1065	1.366
93	0.465	0.993485	0.801	0.895	5.1185	1.3681
94	0.47	0.99351	0.803	0.8963	5.131	1.3703
95	0.475	0.993536	0.8055	0.8975	5.143	1.3725
96	0.48	0.993562	0.8075	0.8988	5.1555	1.3748
97	0.485	0.993586	0.81	0.9001	5.168	1.3769
98	0.49	0.993612	0.8125	0.9015	5.18	1.3792
99	0.495	0.993637	0.815	0.9028	5.192	1.3814
100	0.5	0.993661	0.817	0.9041	5.2045	1.3837
101	0.505	0.993688	0.8195	0.9054	5.217	1.386
102	0.51	0.993715	0.822	0.9068	5.23	1.3883
103	0.515	0.993739	0.8245	0.9081	5.243	1.3904
104	0.52	0.993765	0.827	0.9095	5.2555	1.3926
105	0.525	0.99379	0.8295	0.9108	5.2675	1.395
106	0.53	0.993814	0.832	0.9122	5.28	1.3972
107	0.535	0.993839	0.8345	0.9136	5.293	1.3995
108	0.54	0.993864	0.837	0.9151	5.306	1.4017
109	0.545	0.99389	0.84	0.9165	5.3185	1.4041
110	0.55	0.993915	0.8425	0.9179	5.3305	1.4064
111	0.555	0.993939	0.845	0.9193	5.3435	1.4088
112	0.56	0.993964	0.8475	0.9208	5.3565	1.411
113	0.565	0.993989	0.8505	0.9223	5.369	1.4134
114	0.57	0.994014	0.853	0.9237	5.3825	1.4157
115	0.575	0.994039	0.856	0.9252	5.396	1.4182
116	0.58	0.994065	0.8585	0.9267	5.409	1.4205
117	0.585	0.994091	0.8615	0.9282	5.423	1.4229
118	0.59	0.994115	0.864	0.9297	5.4365	1.4254
119	0.595	0.99414	0.867	0.9312	5.4495	1.4279
120	0.6	0.994167	0.87	0.9328	5.4635	1.4302
121	0.605	0.994192	0.8725	0.9342	5.477	1.4326
122	0.61	0.994217	0.8755	0.9357	5.492	1.4351
123	0.615	0.994242	0.8785	0.9373	5.5055	1.4375
124	0.62	0.994268	0.8815	0.9389	5.519	1.4398
125	0.625	0.994293	0.8845	0.9405	5.5335	1.4424
126	0.63	0.994318	0.8875	0.9421	5.547	1.445
127	0.635	0.994344	0.8905	0.9437	5.561	1.4475
128	0.64	0.994371	0.8935	0.9453	5.575	1.4501
129	0.645	0.994397	0.8965	0.9469	5.5885	1.4527
130	0.65	0.994423	0.8995	0.9486	5.6035	1.4553
131	0.655	0.99445	0.9025	0.9502	5.6185	1.4579
132	0.66	0.994476	0.9055	0.9518	5.6335	1.4606
133	0.665	0.994503	0.909	0.9535	5.648	1.4632
134	0.67	0.994529	0.9125	0.9553	5.663	1.4658
135	0.675	0.994556	0.9155	0.957	5.679	1.4686
136	0.68	0.994584	0.919	0.9587	5.6945	1.4713
137	0.685	0.994611	0.9225	0.9606	5.7105	1.4739
138	0.69	0.994638	0.926	0.9625	5.726	1.4766
139	0.695	0.994665	0.93	0.9644	5.742	1.4794
140	0.7	0.994694	0.9335	0.9662	5.758	1.4822
141	0.705	0.994722	0.937	0.9682	5.775	1.4851
142	0.71	0.994749	0.941	0.9701	5.7915	1.4879
143	0.715	0.994776	0.945	0.9721	5.8085	1.4908
144	0.72	0.994804	0.9485	0.9741	5.8255	1.4936
145	0.725	0.994832	0.9525	0.9761	5.843	1.4966
146	0.73	0.994861	0.957	0.9783	5.861	1.4994
147	0.735	0.994889	0.961	0.9805	5.8795	1.5024
148	0.74	0.994919	0.9655	0.9826	5.898	1.5054
149	0.745	0.994947	0.97	0.9849	5.917	1.5084
150	0.75	0.994977	0.9745	0.9873	5.9355	1.5115
151	0.755	0.995009	0.979	0.9895	5.9555	1.5145
152	0.76	0.995038	0.9835	0.9919	5.974	1.5177
153	0.765	0.995069	0.9885	0.9944	5.9945	1.521
154	0.77	0.9951	0.9935	0.9969	6.0155	1.5243
155	0.775	0.995131	0.999	0.9995	6.0365	1.5276
156	0.78	0.995163	1.004	1.0022	6.058	1.531
157	0.785	0.995197	1.0095	1.0048	6.0795	1.5346
158	0.79	0.995229	1.0155	1.0077	6.102	1.5378
159	0.795	0.995261	1.021	1.0105	6.1245	1.5415
160	0.8	0.995295	1.0265	1.0132	6.148	1.5451
161	0.805	0.99533	1.0325	1.0163	6.172	1.5488
162	0.81	0.995364	1.039	1.0193	6.1955	1.5525
163	0.815	0.995401	1.045	1.0224	6.219	1.5564
164	0.82	0.995437	1.052	1.0258	6.244	1.5601
165	0.825	0.995474	1.059	1.0291	6.268	1.5642
166	0.83	0.995512	1.0655	1.0323	6.295	1.5684
167	0.835	0.99555	1.0725	1.0358	6.323	1.5724
168	0.84	0.995588	1.08	1.0393	6.3505	1.5768
169	0.845	0.995629	1.088	1.0431	6.3795	1.5811
170	0.85	0.99567	1.096	1.047	6.4105	1.5855
171	0.855	0.99571	1.1045	1.051	6.44	1.5899
172	0.86	0.99575	1.113	1.0551	6.473	1.5945
173	0.865	0.995793	1.1225	1.0595	6.506	1.5993
174	0.87	0.995838	1.132	1.064	6.542	1.6041
175	0.875	0.995883	1.1425	1.0689	6.5765	1.6091
176	0.88	0.995927	1.153	1.0738	6.612	1.6144
177	0.885	0.995977	1.1645	1.0791	6.649	1.6197
178	0.89	0.996026	1.1765	1.0847	6.6865	1.6255
179	0.895	0.996075	1.189	1.0905	6.7255	1.6311
180	0.9	0.996129	1.2025	1.0966	6.7685	1.6372
181	0.905	0.996185	1.217	1.1032	6.813	1.6433
182	0.91	0.996241	1.2325	1.1102	6.861	1.65
183	0.915	0.996305	1.249	1.1176	6.9125	1.6571
184	0.92	0.996369	1.267	1.1256	6.9645	1.6641
185	0.925	0.996435	1.2865	1.1342	7.019	1.6715
186	0.93	0.996507	1.3065	1.1432	7.0775	1.6797
187	0.935	0.996583	1.3305	1.1535	7.1425	1.6884
188	0.94	0.996663	1.3575	1.1652	7.212	1.6979
189	0.945	0.996747	1.386	1.1774	7.2805	1.7078
190	0.95	0.996839	1.417	1.1905	7.362	1.7184
191	0.955	0.996935	1.452	1.2051	7.454	1.73
192	0.96	0.997039	1.4935	1.2222	7.5505	1.7427
193	0.965	0.99715	1.543	1.2422	7.6615	1.7572
194	0.97	0.997272	1.6045	1.2666	7.786	1.7732
195	0.975	0.997414	1.6845	1.2979	7.9305	1.792
196	0.98	0.997578	1.781	1.3345	8.1045	1.8153
197	0.985	0.997785	1.9285	1.3887	8.327	1.8464
198	0.99	0.998054	2.163	1.4708	8.6415	1.8905
199	0.995	0.998462	2.686	1.6389	9.1285	1.9565
200	1	0	0	0	0	0
201	1.005	0	0	0	0	0
