# Supplementary material for: Time-varying asymmetry and tail thickness in long series of daily financial returns
Source: publisher site journal article supplement (doi:10.1515/snde-2017-0071), 2018-10-02
Supplement: Supplementary file 43 [file point_est.xlsx]

## Sheet: 1
	log post kernel	delta	rho	alpha0	fi1	beta1	d	lambda1	ni1	ni2	a00	gamma_s0	gamma_s1	gamma_s2	gamma_s3	gamma_c0	gamma_c1	gamma_c2	gamma_c3	phi0	phi1	phi2	phi3	Var24	Var25	Var26	Var27	Var28	Var29	Var30	Var31	Var32	Var33	Var34	Var35	Var36	Var37	Var38	Var39	Var40	Var41	Var42	Var43	Var44	Var45	(a1+a2)/2+b1	a0/[1-(a1+a2)/2-b1]	[a0/(1-(a1+a2)/2-b1)]^0.5	ni2/ni1
1	-16641.5	0.0219257	0.317814	-3.04163	0.725485	1.75458	-0.197373	0.0328004	1.19505	1.58263	-0.000488074	-0.192809	-0.0768908	0.0758078	-0.342692	0.528148	-0.334969	0.712242	0.175798	-4.24541	-3.07134	-2.12334	-3.96947	0.0219257	0.157583	0.047757	0.725485	0.705059	0.450816	0.0328004	5.30472	6.86874	0.499845	-0.192809	-0.0768908	0.0758078	-0.342692	0.528148	-0.334969	0.712242	0.175798	0.000894753	0.00183788	0.00427169	0.00465586	0.0933851	0.0329163	0.0440997	0.0496098
2	-16672.2	0.0255742	0.318151	-3.12482	0.738175	1.74589	-0.235294	0.0279205	1.20212	1.61418	-0.00444254	-0.650696	0.270398	20.6953	-20.9927	-0.0356854	-0.277874	8.75694	-7.28585	-6.11037	-2.89779	-2.03951	-7.53317	0.0255742	0.157747	0.0439448	0.738175	0.702869	0.441446	0.0279205	5.32817	7.02477	0.498586	-0.650696	0.270398	20.6953	-20.9927	-0.0356854	-0.277874	8.75694	-7.28585	0.000648809	0.00178127	0.00445286	0.00446385	0.0917709	0.0318728	0.0429079	0.0485052
3	-16659.9	0.0237462	0.318143	-3.30063	0.714816	1.80142	-0.136392	0.0309022	1.24183	1.6236	0.00194321	-0.128955	-0.0743509	-0.256139	0.0650055	0.366138	-0.0638156	0.488524	0.180551	-4.42189	-3.59378	-2.11397	-3.9987	0.0237462	0.157743	0.0368598	0.714816	0.716643	0.465955	0.0309022	5.46294	7.07234	0.500619	-0.128955	-0.0743509	-0.256139	0.0650055	0.366138	-0.0638156	0.488524	0.180551	0.000851859	0.00142098	0.00392063	0.00430025	0.0922403	0.0307345	0.0429805	0.0492892
[truncated: 5 more columns]
