# Supplementary material for: Time-varying asymmetry and tail thickness in long series of daily financial returns
Source: publisher site journal article supplement (doi:10.1515/snde-2017-0071), 2018-10-02
Supplement: Supplementary file 47 [file postm.xlsx]

## Sheet: 1
	log post kernel	delta	rho	alpha0	alpha1-	beta1	alpha1+	lambda1	ni1	ni2	a00	h0	gamma_s0	gamma_s1	gamma_s2	gamma_c0	gamma_c1	gamma_c2	phi0	phi1	phi2
1	-16558.4	0.00642964	0.32493	-4.51752	-2.14107	2.49523	-4.29993	0.0372242	1.25874	1.77831	-0.00221061	-1.13854	-0.216989	-0.229284	0.0321455	0.284979	-0.180206	0.252692	-6.67846	-4.46456	-3.68593
2	-16560.4	0.0139687	0.324372	-4.51706	-2.14942	2.50393	-4.27724	0.0264203	1.25496	1.76281	-0.00302592	-1.29329	-0.269667	-0.311958	-0.235525	0.323331	-0.205112	-0.00257512	-6.68497	-4.46724	-3.94095
3	-16568.2	0.0146645	0.320086	-4.56277	-2.13689	2.5053	-4.23841	0.0220876	1.25446	1.71437	0.00445789	-1.06025	-0.283574	-0.249373	0.0724426	0.277559	-0.168639	0.107112	-7.00272	-4.42654	-3.39638
