# Supplementary material for: Time-varying asymmetry and tail thickness in long series of daily financial returns
Source: publisher site journal article supplement (doi:10.1515/snde-2017-0071), 2018-10-02
Supplement: Supplementary file 49 [file pp1.xlsx]

## Sheet: 1
	Var1
1	0.0302654
2	0.322463
3	-4.89025
4	-2.1721
5	2.59172
6	-4.03914
7	1.24417
8	1.73761
9	0.000853212
10	2.37587e-05
11	-1.09791
12	-0.393396
13	0.313514
14	-7.28401
