# Supplementary material for: Time-varying asymmetry and tail thickness in long series of daily financial returns
Source: publisher site journal article supplement (doi:10.1515/snde-2017-0071), 2018-10-02
Supplement: Supplementary file 51 [file pp2.xlsx]

## Sheet: 1
	Var1
1	0.0413449
2	0.306076
3	-2.8487
4	4.56562
5	3.58309
6	-0.379647
7	-3.54594
8	-3.58644
9	0.0296133
10	-9.71177e-06
11	2.44139
12	-0.0510878
13	0.0810199
14	-0.145888
