# Supplementary material for: Time-varying asymmetry and tail thickness in long series of daily financial returns
Source: publisher site journal article supplement (doi:10.1515/snde-2017-0071), 2018-10-02
Supplement: Supplementary file 53 [file probs.xlsx]

## Sheet: 1
	(a1+a2)/2+b1 > 1	lambda1 <= 0	ni1 >= ni2	a00 < 0.5	Var5	Var6	Var7	Var8
1	0	0.138947	0.0203918	0.475956	0	34737	5098	118990
