# Supplementary material for: Time-varying asymmetry and tail thickness in long series of daily financial returns
Source: publisher site journal article supplement (doi:10.1515/snde-2017-0071), 2018-10-02
Supplement: Supplementary file 55 [file r_1.xlsx]

## Sheet: 1
	Var1	Var2	Var3	Var4	Var5	Var6	Var7	Var8	Var9	Var10	Var11	Var12	Var13	Var14	Var15	Var16	Var17	Var18	Var19	Var20	Var21	Var22	Var23	Var24	Var25
1	0	0.156642	0.054962	0.054484	0.027481	0.0696185	0.0275847	0.0282237	0.0298365	0.0417711	0.0261069	0.0522139	0.0167084	0.313283	0.0435116	0.0870231	0.0368568	0.0326337	0.130535	0.0133882	0.130535	0.0186478	0.00949343	0.00691574	0.0417711
2	0	0.12108	0.121195	0.121405	0.12171	0.121975	0.122315	0.122765	0.123125	0.123425	0.12375	0.12407	0.124565	0.12496	0.1251	0.12528	0.12551	0.12584	0.12604	0.12647	0.1269	0.12722	0.12805	0.129355	0.13026
3	0	3	5	6	5	5	7	5	5	5	5	6	6	6	5	5	6	5	5	5	5	5	5	5	6
4	0.12106	0.1211	0.12129	0.12152	0.1219	0.12205	0.12258	0.12295	0.1233	0.12355	0.12395	0.12419	0.12494	0.12498	0.12522	0.12534	0.12568	0.126	0.12608	0.12686	0.12694	0.1275	0.1286	0.13011	0.13041
