# Supplementary material for: Time-varying asymmetry and tail thickness in long series of daily financial returns
Source: publisher site journal article supplement (doi:10.1515/snde-2017-0071), 2018-10-02
Supplement: Supplementary file 59 [file thres_inm.xlsx]

## Sheet: 1
	Var1	Var2	Var3	Var4	Var5	Var6	Var7	Var8	Var9	Var10	Var11	Var12	Var13	Var14	Var15	Var16	Var17	Var18	Var19	Var20	Var21	Var22	Var23	Var24	Var25
1	0	0	0	0	0	0	0	0	0	0	0	0	0	0	0	0	0	0	0	0	0	0	0	0	0
2	0.05	-0.02324	0.1	-0.01341	0.125	-0.00991	0.2	-0.00141	0.25	0.00319	0.5	0.02199	0.75	0.04081	0.8	0.0456	0.875	0.05449	0.9	0.05826	0.95	0.06891	111	0.02233	14.4626
3	0.05	-0.02324	0.1	-0.01341	0.125	-0.00991	0.2	-0.00141	0.25	0.00319	0.5	0.02199	0.75	0.04081	0.8	0.0456	0.875	0.05449	0.9	0.05826	0.95	0.06891	111	0.02233	14.4626
4	0.05	-0.02324	0.1	-0.01341	0.125	-0.00991	0.2	-0.00141	0.25	0.00319	0.5	0.02199	0.75	0.04081	0.8	0.0456	0.875	0.05449	0.9	0.05826	0.95	0.06891	111	0.02233	14.4626
5	0.05	-0.02324	0.1	-0.01341	0.125	-0.00991	0.2	-0.00141	0.25	0.00319	0.5	0.02199	0.75	0.04081	0.8	0.0456	0.875	0.05449	0.9	0.05826	0.95	0.06891	111	0.02233	14.4626
6	0.05	-0.02324	0.1	-0.01341	0.125	-0.00991	0.2	-0.00141	0.25	0.00319	0.5	0.02199	0.75	0.04081	0.8	0.0456	0.875	0.05449	0.9	0.05826	0.95	0.06891	111	0.02233	14.4626
7	0.05	-0.02324	0.1	-0.01341	0.125	-0.00991	0.2	-0.00141	0.25	0.00319	0.5	0.02199	0.75	0.04081	0.8	0.0456	0.875	0.05449	0.9	0.05826	0.95	0.06891	111	0.02233	14.4626
8	0.05	-0.02324	0.1	-0.01341	0.125	-0.00991	0.2	-0.00141	0.25	0.00319	0.5	0.02199	0.75	0.04081	0.8	0.0456	0.875	0.05449	0.9	0.05826	0.95	0.06891	111	0.02233	14.4626
9	0.05	-0.02324	0.1	-0.01341	0.125	-0.00991	0.2	-0.00141	0.25	0.00319	0.5	0.02199	0.75	0.04081	0.8	0.0456	0.875	0.05449	0.9	0.05826	0.95	0.06891	111	0.02233	14.4626
10	0.05	-0.02324	0.1	-0.01341	0.125	-0.00991	0.2	-0.00141	0.25	0.00319	0.5	0.02199	0.75	0.04081	0.8	0.0456	0.875	0.05449	0.9	0.05826	0.95	0.06891	111	0.02233	14.4626
11	0.05	-0.02324	0.1	-0.01341	0.125	-0.00991	0.2	-0.00141	0.25	0.00319	0.5	0.02199	0.75	0.04081	0.8	0.0456	0.875	0.05449	0.9	0.05826	0.95	0.06891	111	0.02233	14.4626
12	0.05	-0.02324	0.1	-0.01341	0.125	-0.00991	0.2	-0.00141	0.25	0.00319	0.5	0.02199	0.75	0.04081	0.8	0.0456	0.875	0.05449	0.9	0.05826	0.95	0.06891	111	0.02233	14.4626
13	0.05	-0.02324	0.1	-0.01341	0.125	-0.00991	0.2	-0.00141	0.25	0.00319	0.5	0.02199	0.75	0.04081	0.8	0.0456	0.875	0.05449	0.9	0.05826	0.95	0.06891	111	0.02233	14.4626
14	0.05	-0.02324	0.1	-0.01341	0.125	-0.00991	0.2	-0.00141	0.25	0.00319	0.5	0.02199	0.75	0.04081	0.8	0.0456	0.875	0.05449	0.9	0.05826	0.95	0.06891	111	0.02233	14.4626
15	0.05	-0.02324	0.1	-0.01341	0.125	-0.00991	0.2	-0.00141	0.25	0.00319	0.5	0.02199	0.75	0.04081	0.8	0.0456	0.875	0.05449	0.9	0.05826	0.95	0.06891	111	0.02233	14.4626
16	0.05	-0.02324	0.1	-0.01341	0.125	-0.00991	0.2	-0.00141	0.25	0.00319	0.5	0.02199	0.75	0.04081	0.8	0.0456	0.875	0.05449	0.9	0.05826	0.95	0.06891	111	0.02233	14.4626
17	0.05	-0.02324	0.1	-0.01341	0.125	-0.00991	0.2	-0.00141	0.25	0.00319	0.5	0.02199	0.75	0.04081	0.8	0.0456	0.875	0.05449	0.9	0.05826	0.95	0.06891	111	0.02233	14.4626
18	0.05	-0.02324	0.1	-0.01341	0.125	-0.00991	0.2	-0.00141	0.25	0.00319	0.5	0.02199	0.75	0.04081	0.8	0.0456	0.875	0.05449	0.9	0.05826	0.95	0.06891	111	0.02233	14.4626
19	0.05	-0.02324	0.1	-0.01341	0.125	-0.00991	0.2	-0.00141	0.25	0.00319	0.5	0.02199	0.75	0.04081	0.8	0.0456	0.875	0.05449	0.9	0.05826	0.95	0.06891	111	0.02233	14.4626
20	0.05	-0.02324	0.1	-0.01341	0.125	-0.00991	0.2	-0.00141	0.25	0.00319	0.5	0.02199	0.75	0.04081	0.8	0.0456	0.875	0.05449	0.9	0.05826	0.95	0.06891	111	0.02233	14.4626
21	0.05	-0.02324	0.1	-0.01341	0.125	-0.00991	0.2	-0.00141	0.25	0.00319	0.5	0.02199	0.75	0.04081	0.8	0.0456	0.875	0.05449	0.9	0.05826	0.95	0.06891	111	0.02233	14.4626
22	0.05	-0.02324	0.1	-0.01341	0.125	-0.00991	0.2	-0.00141	0.25	0.00319	0.5	0.02199	0.75	0.04081	0.8	0.0456	0.875	0.05449	0.9	0.05826	0.95	0.06891	111	0.02233	14.4626
23	0.05	-0.02324	0.1	-0.01341	0.125	-0.00991	0.2	-0.00141	0.25	0.00319	0.5	0.02199	0.75	0.04081	0.8	0.0456	0.875	0.05449	0.9	0.05826	0.95	0.06891	111	0.02233	14.4626
24	0.05	-0.02324	0.1	-0.01341	0.125	-0.00991	0.2	-0.00141	0.25	0.00319	0.5	0.02199	0.75	0.04081	0.8	0.0456	0.875	0.05449	0.9	0.05826	0.95	0.06891	111	0.02233	14.4626
25	0.05	-0.02324	0.1	-0.01341	0.125	-0.00991	0.2	-0.00141	0.25	0.00319	0.5	0.02199	0.75	0.04081	0.8	0.0456	0.875	0.05449	0.9	0.05826	0.95	0.06891	111	0.02233	14.4626
26	0.05	-0.02324	0.1	-0.01341	0.125	-0.00991	0.2	-0.00141	0.25	0.00319	0.5	0.02199	0.75	0.04081	0.8	0.0456	0.875	0.05449	0.9	0.05826	0.95	0.06891	111	0.02233	14.4626
27	0.05	-0.02324	0.1	-0.01341	0.125	-0.00991	0.2	-0.00141	0.25	0.00319	0.5	0.02199	0.75	0.04081	0.8	0.0456	0.875	0.05449	0.9	0.05826	0.95	0.06891	111	0.02233	14.4626
28	0.05	-0.02324	0.1	-0.01341	0.125	-0.00991	0.2	-0.00141	0.25	0.00319	0.5	0.02199	0.75	0.04081	0.8	0.0456	0.875	0.05449	0.9	0.05826	0.95	0.06891	111	0.02233	14.4626
29	0.05	-0.02324	0.1	-0.01341	0.125	-0.00991	0.2	-0.00141	0.25	0.00319	0.5	0.02199	0.75	0.04081	0.8	0.0456	0.875	0.05449	0.9	0.05826	0.95	0.06891	111	0.02233	14.4626
30	0.05	-0.02324	0.1	-0.01341	0.125	-0.00991	0.2	-0.00141	0.25	0.00319	0.5	0.02199	0.75	0.04081	0.8	0.0456	0.875	0.05449	0.9	0.05826	0.95	0.06891	111	0.02233	14.4626
31	0.05	-0.02324	0.1	-0.01341	0.125	-0.00991	0.2	-0.00141	0.25	0.00319	0.5	0.02199	0.75	0.04081	0.8	0.0456	0.875	0.05449	0.9	0.05826	0.95	0.06891	111	0.02233	14.4626
32	0.05	-0.02324	0.1	-0.01341	0.125	-0.00991	0.2	-0.00141	0.25	0.00319	0.5	0.02199	0.75	0.04081	0.8	0.0456	0.875	0.05449	0.9	0.05826	0.95	0.06891	111	0.02233	14.4626
33	0.05	-0.02324	0.1	-0.01341	0.125	-0.00991	0.2	-0.00141	0.25	0.00319	0.5	0.02199	0.75	0.04081	0.8	0.0456	0.875	0.05449	0.9	0.05826	0.95	0.06891	111	0.02233	14.4626
34	0.05	-0.02324	0.1	-0.01341	0.125	-0.00991	0.2	-0.00141	0.25	0.00319	0.5	0.02199	0.75	0.04081	0.8	0.0456	0.875	0.05449	0.9	0.05826	0.95	0.06891	111	0.02233	14.4626
35	0.05	-0.02324	0.1	-0.01341	0.125	-0.00991	0.2	-0.00141	0.25	0.00319	0.5	0.02199	0.75	0.04081	0.8	0.0456	0.875	0.05449	0.9	0.05826	0.95	0.06891	111	0.02233	14.4626
36	0.05	-0.02324	0.1	-0.01341	0.125	-0.00991	0.2	-0.00141	0.25	0.00319	0.5	0.02199	0.75	0.04081	0.8	0.0456	0.875	0.05449	0.9	0.05826	0.95	0.06891	111	0.02233	14.4626
37	0.05	-0.02324	0.1	-0.01341	0.125	-0.00991	0.2	-0.00141	0.25	0.00319	0.5	0.02199	0.75	0.04081	0.8	0.0456	0.875	0.05449	0.9	0.05826	0.95	0.06891	111	0.02233	14.4626
38	0.05	-0.02324	0.1	-0.01341	0.125	-0.00991	0.2	-0.00141	0.25	0.00319	0.5	0.02199	0.75	0.04081	0.8	0.0456	0.875	0.05449	0.9	0.05826	0.95	0.06891	111	0.02233	14.4626
39	0.05	-0.02324	0.1	-0.01341	0.125	-0.00991	0.2	-0.00141	0.25	0.00319	0.5	0.02199	0.75	0.04081	0.8	0.0456	0.875	0.05449	0.9	0.05826	0.95	0.06891	111	0.02233	14.4626
40	0.05	-0.02324	0.1	-0.01341	0.125	-0.00991	0.2	-0.00141	0.25	0.00319	0.5	0.02199	0.75	0.04081	0.8	0.0456	0.875	0.05449	0.9	0.05826	0.95	0.06891	111	0.02233	14.4626
41	0.05	-0.02324	0.1	-0.01341	0.125	-0.00991	0.2	-0.00141	0.25	0.00319	0.5	0.02199	0.75	0.04081	0.8	0.0456	0.875	0.05449	0.9	0.05826	0.95	0.06891	111	0.02233	14.4626
42	0.05	-0.02324	0.1	-0.01341	0.125	-0.00991	0.2	-0.00141	0.25	0.00319	0.5	0.02199	0.75	0.04081	0.8	0.0456	0.875	0.05449	0.9	0.05826	0.95	0.06891	111	0.02233	14.4626
43	0.05	-0.02324	0.1	-0.01341	0.125	-0.00991	0.2	-0.00141	0.25	0.00319	0.5	0.02199	0.75	0.04081	0.8	0.0456	0.875	0.05449	0.9	0.05826	0.95	0.06891	111	0.02233	14.4626
44	0.05	-0.02324	0.1	-0.01341	0.125	-0.00991	0.2	-0.00141	0.25	0.00319	0.5	0.02199	0.75	0.04081	0.8	0.0456	0.875	0.05449	0.9	0.05826	0.95	0.06891	111	0.02233	14.4626
45	0.05	-0.02324	0.1	-0.01341	0.125	-0.00991	0.2	-0.00141	0.25	0.00319	0.5	0.02199	0.75	0.04081	0.8	0.0456	0.875	0.05449	0.9	0.05826	0.95	0.06891	111	0.02233	14.4626
46	0.05	-0.02324	0.1	-0.01341	0.125	-0.00991	0.2	-0.00141	0.25	0.00319	0.5	0.02199	0.75	0.04081	0.8	0.0456	0.875	0.05449	0.9	0.05826	0.95	0.06891	111	0.02233	14.4626
47	0.05	-0.02324	0.1	-0.01341	0.125	-0.00991	0.2	-0.00141	0.25	0.00319	0.5	0.02199	0.75	0.04081	0.8	0.0456	0.875	0.05449	0.9	0.05826	0.95	0.06891	111	0.02233	14.4626
48	0.05	-0.02324	0.1	-0.01341	0.125	-0.00991	0.2	-0.00141	0.25	0.00319	0.5	0.02199	0.75	0.04081	0.8	0.0456	0.875	0.05449	0.9	0.05826	0.95	0.06891	111	0.02233	14.4626
49	0.05	-0.02324	0.1	-0.01341	0.125	-0.00991	0.2	-0.00141	0.25	0.00319	0.5	0.02199	0.75	0.04081	0.8	0.0456	0.875	0.05449	0.9	0.05826	0.95	0.06891	111	0.02233	14.4626
50	0.05	-0.02324	0.1	-0.01341	0.125	-0.00991	0.2	-0.00141	0.25	0.00319	0.5	0.02199	0.75	0.04081	0.8	0.0456	0.875	0.05449	0.9	0.05826	0.95	0.06891	111	0.02233	14.4626
51	0.05	-0.02324	0.1	-0.01341	0.125	-0.00991	0.2	-0.00141	0.25	0.00319	0.5	0.02199	0.75	0.04081	0.8	0.0456	0.875	0.05449	0.9	0.05826	0.95	0.06891	111	0.02233	14.4626
52	0.05	-0.02324	0.1	-0.01341	0.125	-0.00991	0.2	-0.00141	0.25	0.00319	0.5	0.02199	0.75	0.04081	0.8	0.0456	0.875	0.05449	0.9	0.05826	0.95	0.06891	111	0.02233	14.4626
53	0.05	-0.02324	0.1	-0.01341	0.125	-0.00991	0.2	-0.00141	0.25	0.00319	0.5	0.02199	0.75	0.04081	0.8	0.0456	0.875	0.05449	0.9	0.05826	0.95	0.06891	111	0.02233	14.4626
54	0.05	-0.02324	0.1	-0.01341	0.125	-0.00991	0.2	-0.00141	0.25	0.00319	0.5	0.02199	0.75	0.04081	0.8	0.0456	0.875	0.05449	0.9	0.05826	0.95	0.06891	111	0.02233	14.4626
55	0.05	-0.02324	0.1	-0.01341	0.125	-0.00991	0.2	-0.00141	0.25	0.00319	0.5	0.02199	0.75	0.04081	0.8	0.0456	0.875	0.05449	0.9	0.05826	0.95	0.06891	111	0.02233	14.4626
56	0.05	-0.02324	0.1	-0.01341	0.125	-0.00991	0.2	-0.00141	0.25	0.00319	0.5	0.02199	0.75	0.04081	0.8	0.0456	0.875	0.05449	0.9	0.05826	0.95	0.06891	111	0.02233	14.4626
57	0.05	-0.02324	0.1	-0.01341	0.125	-0.00991	0.2	-0.00141	0.25	0.00319	0.5	0.02199	0.75	0.04081	0.8	0.0456	0.875	0.05449	0.9	0.05826	0.95	0.06891	111	0.02233	14.4626
58	0.05	-0.02324	0.1	-0.01341	0.125	-0.00991	0.2	-0.00141	0.25	0.00319	0.5	0.02199	0.75	0.04081	0.8	0.0456	0.875	0.05449	0.9	0.05826	0.95	0.06891	111	0.02233	14.4626
59	0.05	-0.02324	0.1	-0.01341	0.125	-0.00991	0.2	-0.00141	0.25	0.00319	0.5	0.02199	0.75	0.04081	0.8	0.0456	0.875	0.05449	0.9	0.05826	0.95	0.06891	111	0.02233	14.4626
60	0.05	-0.02324	0.1	-0.01341	0.125	-0.00991	0.2	-0.00141	0.25	0.00319	0.5	0.02199	0.75	0.04081	0.8	0.0456	0.875	0.05449	0.9	0.05826	0.95	0.06891	111	0.02233	14.4626
61	0.05	-0.02324	0.1	-0.01341	0.125	-0.00991	0.2	-0.00141	0.25	0.00319	0.5	0.02199	0.75	0.04081	0.8	0.0456	0.875	0.05449	0.9	0.05826	0.95	0.06891	111	0.02233	14.4626
62	0.05	-0.02324	0.1	-0.01341	0.125	-0.00991	0.2	-0.00141	0.25	0.00319	0.5	0.02199	0.75	0.04081	0.8	0.0456	0.875	0.05449	0.9	0.05826	0.95	0.06891	111	0.02233	14.4626
63	0.05	-0.02324	0.1	-0.01341	0.125	-0.00991	0.2	-0.00141	0.25	0.00319	0.5	0.02199	0.75	0.04081	0.8	0.0456	0.875	0.05449	0.9	0.05826	0.95	0.06891	111	0.02233	14.4626
64	0.05	-0.02324	0.1	-0.01341	0.125	-0.00991	0.2	-0.00141	0.25	0.00319	0.5	0.02199	0.75	0.04081	0.8	0.0456	0.875	0.05449	0.9	0.05826	0.95	0.06891	111	0.02233	14.4626
65	0.05	-0.02324	0.1	-0.01341	0.125	-0.00991	0.2	-0.00141	0.25	0.00319	0.5	0.02199	0.75	0.04081	0.8	0.0456	0.875	0.05449	0.9	0.05826	0.95	0.06891	111	0.02233	14.4626
66	0.05	-0.02324	0.1	-0.01341	0.125	-0.00991	0.2	-0.00141	0.25	0.00319	0.5	0.02199	0.75	0.04081	0.8	0.0456	0.875	0.05449	0.9	0.05826	0.95	0.06891	111	0.02233	14.4626
67	0.05	-0.02324	0.1	-0.01341	0.125	-0.00991	0.2	-0.00141	0.25	0.00319	0.5	0.02199	0.75	0.04081	0.8	0.0456	0.875	0.05449	0.9	0.05826	0.95	0.06891	111	0.02233	14.4626
68	0.05	-0.02324	0.1	-0.01341	0.125	-0.00991	0.2	-0.00141	0.25	0.00319	0.5	0.02199	0.75	0.04081	0.8	0.0456	0.875	0.05449	0.9	0.05826	0.95	0.06891	111	0.02233	14.4626
69	0.05	-0.02324	0.1	-0.01341	0.125	-0.00991	0.2	-0.00141	0.25	0.00319	0.5	0.02199	0.75	0.04081	0.8	0.0456	0.875	0.05449	0.9	0.05826	0.95	0.06891	111	0.02233	14.4626
70	0.05	-0.02324	0.1	-0.01341	0.125	-0.00991	0.2	-0.00141	0.25	0.00319	0.5	0.02199	0.75	0.04081	0.8	0.0456	0.875	0.05449	0.9	0.05826	0.95	0.06891	111	0.02233	14.4626
71	0.05	-0.02324	0.1	-0.01341	0.125	-0.00991	0.2	-0.00141	0.25	0.00319	0.5	0.02199	0.75	0.04081	0.8	0.0456	0.875	0.05449	0.9	0.05826	0.95	0.06891	111	0.02233	14.4626
72	0.05	-0.02324	0.1	-0.01341	0.125	-0.00991	0.2	-0.00141	0.25	0.00319	0.5	0.02199	0.75	0.04081	0.8	0.0456	0.875	0.05449	0.9	0.05826	0.95	0.06891	111	0.02233	14.4626
73	0.05	-0.02324	0.1	-0.01341	0.125	-0.00991	0.2	-0.00141	0.25	0.00319	0.5	0.02199	0.75	0.04081	0.8	0.0456	0.875	0.05449	0.9	0.05826	0.95	0.06891	111	0.02233	14.4626
74	0.05	-0.02324	0.1	-0.01341	0.125	-0.00991	0.2	-0.00141	0.25	0.00319	0.5	0.02199	0.75	0.04081	0.8	0.0456	0.875	0.05449	0.9	0.05826	0.95	0.06891	111	0.02233	14.4626
75	0.05	-0.02324	0.1	-0.01341	0.125	-0.00991	0.2	-0.00141	0.25	0.00319	0.5	0.02199	0.75	0.04081	0.8	0.0456	0.875	0.05449	0.9	0.05826	0.95	0.06891	111	0.02233	14.4626
76	0.05	-0.02324	0.1	-0.01341	0.125	-0.00991	0.2	-0.00141	0.25	0.00319	0.5	0.02199	0.75	0.04081	0.8	0.0456	0.875	0.05449	0.9	0.05826	0.95	0.06891	111	0.02233	14.4626
77	0.05	-0.02324	0.1	-0.01341	0.125	-0.00991	0.2	-0.00141	0.25	0.00319	0.5	0.02199	0.75	0.04081	0.8	0.0456	0.875	0.05449	0.9	0.05826	0.95	0.06891	111	0.02233	14.4626
78	0.05	-0.02324	0.1	-0.01341	0.125	-0.00991	0.2	-0.00141	0.25	0.00319	0.5	0.02199	0.75	0.04081	0.8	0.0456	0.875	0.05449	0.9	0.05826	0.95	0.06891	111	0.02233	14.4626
79	0.05	-0.02324	0.1	-0.01341	0.125	-0.00991	0.2	-0.00141	0.25	0.00319	0.5	0.02199	0.75	0.04081	0.8	0.0456	0.875	0.05449	0.9	0.05826	0.95	0.06891	111	0.02233	14.4626
80	0.05	-0.02324	0.1	-0.01341	0.125	-0.00991	0.2	-0.00141	0.25	0.00319	0.5	0.02199	0.75	0.04081	0.8	0.0456	0.875	0.05449	0.9	0.05826	0.95	0.06891	111	0.02233	14.4626
81	0.05	-0.02324	0.1	-0.01341	0.125	-0.00991	0.2	-0.00141	0.25	0.00319	0.5	0.02199	0.75	0.04081	0.8	0.0456	0.875	0.05449	0.9	0.05826	0.95	0.06891	111	0.02233	14.4626
82	0.05	-0.02324	0.1	-0.01341	0.125	-0.00991	0.2	-0.00141	0.25	0.00319	0.5	0.02199	0.75	0.04081	0.8	0.0456	0.875	0.05449	0.9	0.05826	0.95	0.06891	111	0.02233	14.4626
83	0.05	-0.02324	0.1	-0.01341	0.125	-0.00991	0.2	-0.00141	0.25	0.00319	0.5	0.02199	0.75	0.04081	0.8	0.0456	0.875	0.05449	0.9	0.05826	0.95	0.06891	111	0.02233	14.4626
84	0.05	-0.02324	0.1	-0.01341	0.125	-0.00991	0.2	-0.00141	0.25	0.00319	0.5	0.02199	0.75	0.04081	0.8	0.0456	0.875	0.05449	0.9	0.05826	0.95	0.06891	111	0.02233	14.4626
85	0.05	-0.02324	0.1	-0.01341	0.125	-0.00991	0.2	-0.00141	0.25	0.00319	0.5	0.02199	0.75	0.04081	0.8	0.0456	0.875	0.05449	0.9	0.05826	0.95	0.06891	111	0.02233	14.4626
86	0.05	-0.02324	0.1	-0.01341	0.125	-0.00991	0.2	-0.00141	0.25	0.00319	0.5	0.02199	0.75	0.04081	0.8	0.0456	0.875	0.05449	0.9	0.05826	0.95	0.06891	111	0.02233	14.4626
87	0.05	-0.02324	0.1	-0.01341	0.125	-0.00991	0.2	-0.00141	0.25	0.00319	0.5	0.02199	0.75	0.04081	0.8	0.0456	0.875	0.05449	0.9	0.05826	0.95	0.06891	111	0.02233	14.4626
88	0.05	-0.02324	0.1	-0.01341	0.125	-0.00991	0.2	-0.00141	0.25	0.00319	0.5	0.02199	0.75	0.04081	0.8	0.0456	0.875	0.05449	0.9	0.05826	0.95	0.06891	111	0.02233	14.4626
89	0.05	-0.02324	0.1	-0.01341	0.125	-0.00991	0.2	-0.00141	0.25	0.00319	0.5	0.02199	0.75	0.04081	0.8	0.0456	0.875	0.05449	0.9	0.05826	0.95	0.06891	111	0.02233	14.4626
90	0.05	-0.02324	0.1	-0.01341	0.125	-0.00991	0.2	-0.00141	0.25	0.00319	0.5	0.02199	0.75	0.04081	0.8	0.0456	0.875	0.05449	0.9	0.05826	0.95	0.06891	111	0.02233	14.4626
91	0.05	-0.02324	0.1	-0.01341	0.125	-0.00991	0.2	-0.00141	0.25	0.00319	0.5	0.02199	0.75	0.04081	0.8	0.0456	0.875	0.05449	0.9	0.05826	0.95	0.06891	111	0.02233	14.4626
92	0.05	-0.02324	0.1	-0.01341	0.125	-0.00991	0.2	-0.00141	0.25	0.00319	0.5	0.02199	0.75	0.04081	0.8	0.0456	0.875	0.05449	0.9	0.05826	0.95	0.06891	111	0.02233	14.4626
93	0.05	-0.02324	0.1	-0.01341	0.125	-0.00991	0.2	-0.00141	0.25	0.00319	0.5	0.02199	0.75	0.04081	0.8	0.0456	0.875	0.05449	0.9	0.05826	0.95	0.06891	111	0.02233	14.4626
94	0.05	-0.02324	0.1	-0.01341	0.125	-0.00991	0.2	-0.00141	0.25	0.00319	0.5	0.02199	0.75	0.04081	0.8	0.0456	0.875	0.05449	0.9	0.05826	0.95	0.06891	111	0.02233	14.4626
95	0.05	-0.02324	0.1	-0.01341	0.125	-0.00991	0.2	-0.00141	0.25	0.00319	0.5	0.02199	0.75	0.04081	0.8	0.0456	0.875	0.05449	0.9	0.05826	0.95	0.06891	111	0.02233	14.4626
96	0.05	-0.02324	0.1	-0.01341	0.125	-0.00991	0.2	-0.00141	0.25	0.00319	0.5	0.02199	0.75	0.04081	0.8	0.0456	0.875	0.05449	0.9	0.05826	0.95	0.06891	111	0.02233	14.4626
97	0.05	-0.02324	0.1	-0.01341	0.125	-0.00991	0.2	-0.00141	0.25	0.00319	0.5	0.02199	0.75	0.04081	0.8	0.0456	0.875	0.05449	0.9	0.05826	0.95	0.06891	111	0.02233	14.4626
98	0.05	-0.02324	0.1	-0.01341	0.125	-0.00991	0.2	-0.00141	0.25	0.00319	0.5	0.02199	0.75	0.04081	0.8	0.0456	0.875	0.05449	0.9	0.05826	0.95	0.06891	111	0.02233	14.4626
99	0.05	-0.02324	0.1	-0.01341	0.125	-0.00991	0.2	-0.00141	0.25	0.00319	0.5	0.02199	0.75	0.04081	0.8	0.0456	0.875	0.05449	0.9	0.05826	0.95	0.06891	111	0.02233	14.4626
100	0.05	-0.02324	0.1	-0.01341	0.125	-0.00991	0.2	-0.00141	0.25	0.00319	0.5	0.02199	0.75	0.04081	0.8	0.0456	0.875	0.05449	0.9	0.05826	0.95	0.06891	111	0.02233	14.4626
101	0.05	-0.02324	0.1	-0.01341	0.125	-0.00991	0.2	-0.00141	0.25	0.00319	0.5	0.02199	0.75	0.04081	0.8	0.0456	0.875	0.05449	0.9	0.05826	0.95	0.06891	111	0.02233	14.4626
102	0.05	-0.02324	0.1	-0.01341	0.125	-0.00991	0.2	-0.00141	0.25	0.00319	0.5	0.02199	0.75	0.04081	0.8	0.0456	0.875	0.05449	0.9	0.05826	0.95	0.06891	111	0.02233	14.4626
103	0.05	-0.02324	0.1	-0.01341	0.125	-0.00991	0.2	-0.00141	0.25	0.00319	0.5	0.02199	0.75	0.04081	0.8	0.0456	0.875	0.05449	0.9	0.05826	0.95	0.06891	111	0.02233	14.4626
104	0.05	-0.02324	0.1	-0.01341	0.125	-0.00991	0.2	-0.00141	0.25	0.00319	0.5	0.02199	0.75	0.04081	0.8	0.0456	0.875	0.05449	0.9	0.05826	0.95	0.06891	111	0.02233	14.4626
105	0.05	-0.02324	0.1	-0.01341	0.125	-0.00991	0.2	-0.00141	0.25	0.00319	0.5	0.02199	0.75	0.04081	0.8	0.0456	0.875	0.05449	0.9	0.05826	0.95	0.06891	111	0.02233	14.4626
106	0.05	-0.02324	0.1	-0.01341	0.125	-0.00991	0.2	-0.00141	0.25	0.00319	0.5	0.02199	0.75	0.04081	0.8	0.0456	0.875	0.05449	0.9	0.05826	0.95	0.06891	111	0.02233	14.4626
107	0.05	-0.02324	0.1	-0.01341	0.125	-0.00991	0.2	-0.00141	0.25	0.00319	0.5	0.02199	0.75	0.04081	0.8	0.0456	0.875	0.05449	0.9	0.05826	0.95	0.06891	111	0.02233	14.4626
108	0.05	-0.02324	0.1	-0.01341	0.125	-0.00991	0.2	-0.00141	0.25	0.00319	0.5	0.02199	0.75	0.04081	0.8	0.0456	0.875	0.05449	0.9	0.05826	0.95	0.06891	111	0.02233	14.4626
109	0.05	-0.02324	0.1	-0.01341	0.125	-0.00991	0.2	-0.00141	0.25	0.00319	0.5	0.02199	0.75	0.04081	0.8	0.0456	0.875	0.05449	0.9	0.05826	0.95	0.06891	111	0.02233	14.4626
110	0.05	-0.02324	0.1	-0.01341	0.125	-0.00991	0.2	-0.00141	0.25	0.00319	0.5	0.02199	0.75	0.04081	0.8	0.0456	0.875	0.05449	0.9	0.05826	0.95	0.06891	111	0.02233	14.4626
111	0.05	-0.02324	0.1	-0.01341	0.125	-0.00991	0.2	-0.00141	0.25	0.00319	0.5	0.02199	0.75	0.04081	0.8	0.0456	0.875	0.05449	0.9	0.05826	0.95	0.06891	111	0.02233	14.4626
112	0.05	-0.02324	0.1	-0.01341	0.125	-0.00991	0.2	-0.00141	0.25	0.00319	0.5	0.02199	0.75	0.04081	0.8	0.0456	0.875	0.05449	0.9	0.05826	0.95	0.06891	111	0.02233	14.4626
113	0.05	-0.02324	0.1	-0.01341	0.125	-0.00991	0.2	-0.00141	0.25	0.00319	0.5	0.02199	0.75	0.04081	0.8	0.0456	0.875	0.05449	0.9	0.05826	0.95	0.06891	111	0.02233	14.4626
114	0.05	-0.02324	0.1	-0.01341	0.125	-0.00991	0.2	-0.00141	0.25	0.00319	0.5	0.02199	0.75	0.04081	0.8	0.0456	0.875	0.05449	0.9	0.05826	0.95	0.06891	111	0.02233	14.4626
115	0.05	-0.02324	0.1	-0.01341	0.125	-0.00991	0.2	-0.00141	0.25	0.00319	0.5	0.02199	0.75	0.04081	0.8	0.0456	0.875	0.05449	0.9	0.05826	0.95	0.06891	111	0.02233	14.4626
116	0.05	-0.02324	0.1	-0.01341	0.125	-0.00991	0.2	-0.00141	0.25	0.00319	0.5	0.02199	0.75	0.04081	0.8	0.0456	0.875	0.05449	0.9	0.05826	0.95	0.06891	111	0.02233	14.4626
117	0.05	-0.02324	0.1	-0.01341	0.125	-0.00991	0.2	-0.00141	0.25	0.00319	0.5	0.02199	0.75	0.04081	0.8	0.0456	0.875	0.05449	0.9	0.05826	0.95	0.06891	111	0.02233	14.4626
118	0.05	-0.02324	0.1	-0.01341	0.125	-0.00991	0.2	-0.00141	0.25	0.00319	0.5	0.02199	0.75	0.04081	0.8	0.0456	0.875	0.05449	0.9	0.05826	0.95	0.06891	111	0.02233	14.4626
119	0.05	-0.02324	0.1	-0.01341	0.125	-0.00991	0.2	-0.00141	0.25	0.00319	0.5	0.02199	0.75	0.04081	0.8	0.0456	0.875	0.05449	0.9	0.05826	0.95	0.06891	111	0.02233	14.4626
120	0.05	-0.02324	0.1	-0.01341	0.125	-0.00991	0.2	-0.00141	0.25	0.00319	0.5	0.02199	0.75	0.04081	0.8	0.0456	0.875	0.05449	0.9	0.05826	0.95	0.06891	111	0.02233	14.4626
121	0.05	-0.02324	0.1	-0.01341	0.125	-0.00991	0.2	-0.00141	0.25	0.00319	0.5	0.02199	0.75	0.04081	0.8	0.0456	0.875	0.05449	0.9	0.05826	0.95	0.06891	111	0.02233	14.4626
122	0.05	-0.02324	0.1	-0.01341	0.125	-0.00991	0.2	-0.00141	0.25	0.00319	0.5	0.02199	0.75	0.04081	0.8	0.0456	0.875	0.05449	0.9	0.05826	0.95	0.06891	111	0.02233	14.4626
123	0.05	-0.02324	0.1	-0.01341	0.125	-0.00991	0.2	-0.00141	0.25	0.00319	0.5	0.02199	0.75	0.04081	0.8	0.0456	0.875	0.05449	0.9	0.05826	0.95	0.06891	111	0.02233	14.4626
124	0.05	-0.02324	0.1	-0.01341	0.125	-0.00991	0.2	-0.00141	0.25	0.00319	0.5	0.02199	0.75	0.04081	0.8	0.0456	0.875	0.05449	0.9	0.05826	0.95	0.06891	111	0.02233	14.4626
125	0.05	-0.02324	0.1	-0.01341	0.125	-0.00991	0.2	-0.00141	0.25	0.00319	0.5	0.02199	0.75	0.04081	0.8	0.0456	0.875	0.05449	0.9	0.05826	0.95	0.06891	111	0.02233	14.4626
126	0.05	-0.02324	0.1	-0.01341	0.125	-0.00991	0.2	-0.00141	0.25	0.00319	0.5	0.02199	0.75	0.04081	0.8	0.0456	0.875	0.05449	0.9	0.05826	0.95	0.06891	111	0.02233	14.4626
127	0.05	-0.02324	0.1	-0.01341	0.125	-0.00991	0.2	-0.00141	0.25	0.00319	0.5	0.02199	0.75	0.04081	0.8	0.0456	0.875	0.05449	0.9	0.05826	0.95	0.06891	111	0.02233	14.4626
128	0.05	-0.02324	0.1	-0.01341	0.125	-0.00991	0.2	-0.00141	0.25	0.00319	0.5	0.02199	0.75	0.04081	0.8	0.0456	0.875	0.05449	0.9	0.05826	0.95	0.06891	111	0.02233	14.4626
129	0.05	-0.02324	0.1	-0.01341	0.125	-0.00991	0.2	-0.00141	0.25	0.00319	0.5	0.02199	0.75	0.04081	0.8	0.0456	0.875	0.05449	0.9	0.05826	0.95	0.06891	111	0.02233	14.4626
130	0.05	-0.02324	0.1	-0.01341	0.125	-0.00991	0.2	-0.00141	0.25	0.00319	0.5	0.02199	0.75	0.04081	0.8	0.0456	0.875	0.05449	0.9	0.05826	0.95	0.06891	111	0.02233	14.4626
131	0.05	-0.02324	0.1	-0.01341	0.125	-0.00991	0.2	-0.00141	0.25	0.00319	0.5	0.02199	0.75	0.04081	0.8	0.0456	0.875	0.05449	0.9	0.05826	0.95	0.06891	111	0.02233	14.4626
132	0.05	-0.02324	0.1	-0.01341	0.125	-0.00991	0.2	-0.00141	0.25	0.00319	0.5	0.02199	0.75	0.04081	0.8	0.0456	0.875	0.05449	0.9	0.05826	0.95	0.06891	111	0.02233	14.4626
133	0.05	-0.02324	0.1	-0.01341	0.125	-0.00991	0.2	-0.00141	0.25	0.00319	0.5	0.02199	0.75	0.04081	0.8	0.0456	0.875	0.05449	0.9	0.05826	0.95	0.06891	111	0.02233	14.4626
134	0.05	-0.02324	0.1	-0.01341	0.125	-0.00991	0.2	-0.00141	0.25	0.00319	0.5	0.02199	0.75	0.04081	0.8	0.0456	0.875	0.05449	0.9	0.05826	0.95	0.06891	111	0.02233	14.4626
135	0.05	-0.02324	0.1	-0.01341	0.125	-0.00991	0.2	-0.00141	0.25	0.00319	0.5	0.02199	0.75	0.04081	0.8	0.0456	0.875	0.05449	0.9	0.05826	0.95	0.06891	111	0.02233	14.4626
136	0.05	-0.02324	0.1	-0.01341	0.125	-0.00991	0.2	-0.00141	0.25	0.00319	0.5	0.02199	0.75	0.04081	0.8	0.0456	0.875	0.05449	0.9	0.05826	0.95	0.06891	111	0.02233	14.4626
137	0.05	-0.02324	0.1	-0.01341	0.125	-0.00991	0.2	-0.00141	0.25	0.00319	0.5	0.02199	0.75	0.04081	0.8	0.0456	0.875	0.05449	0.9	0.05826	0.95	0.06891	111	0.02233	14.4626
138	0.05	-0.02324	0.1	-0.01341	0.125	-0.00991	0.2	-0.00141	0.25	0.00319	0.5	0.02199	0.75	0.04081	0.8	0.0456	0.875	0.05449	0.9	0.05826	0.95	0.06891	111	0.02233	14.4626
139	0.05	-0.02324	0.1	-0.01341	0.125	-0.00991	0.2	-0.00141	0.25	0.00319	0.5	0.02199	0.75	0.04081	0.8	0.0456	0.875	0.05449	0.9	0.05826	0.95	0.06891	111	0.02233	14.4626
140	0.05	-0.02324	0.1	-0.01341	0.125	-0.00991	0.2	-0.00141	0.25	0.00319	0.5	0.02199	0.75	0.04081	0.8	0.0456	0.875	0.05449	0.9	0.05826	0.95	0.06891	111	0.02233	14.4626
141	0.05	-0.02324	0.1	-0.01341	0.125	-0.00991	0.2	-0.00141	0.25	0.00319	0.5	0.02199	0.75	0.04081	0.8	0.0456	0.875	0.05449	0.9	0.05826	0.95	0.06891	111	0.02233	14.4626
142	0.05	-0.02324	0.1	-0.01341	0.125	-0.00991	0.2	-0.00141	0.25	0.00319	0.5	0.02199	0.75	0.04081	0.8	0.0456	0.875	0.05449	0.9	0.05826	0.95	0.06891	111	0.02233	14.4626
143	0.05	-0.02324	0.1	-0.01341	0.125	-0.00991	0.2	-0.00141	0.25	0.00319	0.5	0.02199	0.75	0.04081	0.8	0.0456	0.875	0.05449	0.9	0.05826	0.95	0.06891	111	0.02233	14.4626
144	0.05	-0.02324	0.1	-0.01341	0.125	-0.00991	0.2	-0.00141	0.25	0.00319	0.5	0.02199	0.75	0.04081	0.8	0.0456	0.875	0.05449	0.9	0.05826	0.95	0.06891	111	0.02233	14.4626
145	0.05	-0.02324	0.1	-0.01341	0.125	-0.00991	0.2	-0.00141	0.25	0.00319	0.5	0.02199	0.75	0.04081	0.8	0.0456	0.875	0.05449	0.9	0.05826	0.95	0.06891	111	0.02233	14.4626
146	0.05	-0.02324	0.1	-0.01341	0.125	-0.00991	0.2	-0.00141	0.25	0.00319	0.5	0.02199	0.75	0.04081	0.8	0.0456	0.875	0.05449	0.9	0.05826	0.95	0.06891	111	0.02233	14.4626
147	0.05	-0.02324	0.1	-0.01341	0.125	-0.00991	0.2	-0.00141	0.25	0.00319	0.5	0.02199	0.75	0.04081	0.8	0.0456	0.875	0.05449	0.9	0.05826	0.95	0.06891	111	0.02233	14.4626
148	0.05	-0.02324	0.1	-0.01341	0.125	-0.00991	0.2	-0.00141	0.25	0.00319	0.5	0.02199	0.75	0.04081	0.8	0.0456	0.875	0.05449	0.9	0.05826	0.95	0.06891	111	0.02233	14.4626
149	0.05	-0.02324	0.1	-0.01341	0.125	-0.00991	0.2	-0.00141	0.25	0.00319	0.5	0.02199	0.75	0.04081	0.8	0.0456	0.875	0.05449	0.9	0.05826	0.95	0.06891	111	0.02233	14.4626
150	0.05	-0.02324	0.1	-0.01341	0.125	-0.00991	0.2	-0.00141	0.25	0.00319	0.5	0.02199	0.75	0.04081	0.8	0.0456	0.875	0.05449	0.9	0.05826	0.95	0.06891	111	0.02233	14.4626
151	0.05	-0.02324	0.1	-0.01341	0.125	-0.00991	0.2	-0.00141	0.25	0.00319	0.5	0.02199	0.75	0.04081	0.8	0.0456	0.875	0.05449	0.9	0.05826	0.95	0.06891	111	0.02233	14.4626
152	0.05	-0.02324	0.1	-0.01341	0.125	-0.00991	0.2	-0.00141	0.25	0.00319	0.5	0.02199	0.75	0.04081	0.8	0.0456	0.875	0.05449	0.9	0.05826	0.95	0.06891	111	0.02233	14.4626
153	0.05	-0.02324	0.1	-0.01341	0.125	-0.00991	0.2	-0.00141	0.25	0.00319	0.5	0.02199	0.75	0.04081	0.8	0.0456	0.875	0.05449	0.9	0.05826	0.95	0.06891	111	0.02233	14.4626
154	0.05	-0.02324	0.1	-0.01341	0.125	-0.00991	0.2	-0.00141	0.25	0.00319	0.5	0.02199	0.75	0.04081	0.8	0.0456	0.875	0.05449	0.9	0.05826	0.95	0.06891	111	0.02233	14.4626
155	0.05	-0.02324	0.1	-0.01341	0.125	-0.00991	0.2	-0.00141	0.25	0.00319	0.5	0.02199	0.75	0.04081	0.8	0.0456	0.875	0.05449	0.9	0.05826	0.95	0.06891	111	0.02233	14.4626
156	0.05	-0.02324	0.1	-0.01341	0.125	-0.00991	0.2	-0.00141	0.25	0.00319	0.5	0.02199	0.75	0.04081	0.8	0.0456	0.875	0.05449	0.9	0.05826	0.95	0.06891	111	0.02233	14.4626
157	0.05	-0.02324	0.1	-0.01341	0.125	-0.00991	0.2	-0.00141	0.25	0.00319	0.5	0.02199	0.75	0.04081	0.8	0.0456	0.875	0.05449	0.9	0.05826	0.95	0.06891	111	0.02233	14.4626
158	0.05	-0.02324	0.1	-0.01341	0.125	-0.00991	0.2	-0.00141	0.25	0.00319	0.5	0.02199	0.75	0.04081	0.8	0.0456	0.875	0.05449	0.9	0.05826	0.95	0.06891	111	0.02233	14.4626
