# Supplementary material for: Time-varying asymmetry and tail thickness in long series of daily financial returns
Source: publisher site journal article supplement (doi:10.1515/snde-2017-0071), 2018-10-02
Supplement: Supplementary file 61 [file thres_ni1.xlsx]

## Sheet: 1
	Var1	Var2	Var3	Var4	Var5	Var6	Var7	Var8	Var9	Var10	Var11	Var12	Var13	Var14	Var15	Var16	Var17	Var18	Var19	Var20	Var21	Var22	Var23	Var24	Var25
1	0	0	0	0	0	0	0	0	0	0	0	0	0	0	0	0	0	0	0	0	0	0	0	0	0
2	0.05	4.8847	0.1	5.0046	0.125	5.0494	0.2	5.1565	0.25	5.2159	0.5	5.4639	0.75	5.7319	0.8	5.8013	0.875	5.9325	0.9	5.9915	0.95	6.1546	111	5.4339	1.05185
3	0.05	4.8847	0.1	5.0046	0.125	5.0494	0.2	5.1565	0.25	5.2159	0.5	5.4639	0.75	5.7319	0.8	5.8013	0.875	5.9325	0.9	5.9915	0.95	6.1546	111	5.4339	1.05185
4	0.05	4.8847	0.1	5.0046	0.125	5.0494	0.2	5.1565	0.25	5.2159	0.5	5.4639	0.75	5.7319	0.8	5.8013	0.875	5.9325	0.9	5.9915	0.95	6.1546	111	5.4339	1.05185
5	0.05	4.8847	0.1	5.0046	0.125	5.0494	0.2	5.1565	0.25	5.2159	0.5	5.4639	0.75	5.7319	0.8	5.8013	0.875	5.9325	0.9	5.9915	0.95	6.1546	111	5.4339	1.05185
6	0.05	4.8847	0.1	5.0046	0.125	5.0494	0.2	5.1565	0.25	5.2159	0.5	5.4639	0.75	5.7319	0.8	5.8013	0.875	5.9325	0.9	5.9915	0.95	6.1546	111	5.4339	1.05185
7	0.05	4.8847	0.1	5.0046	0.125	5.0494	0.2	5.1565	0.25	5.2159	0.5	5.4639	0.75	5.7319	0.8	5.8013	0.875	5.9325	0.9	5.9915	0.95	6.1546	111	5.4339	1.05185
8	0.05	4.8847	0.1	5.0046	0.125	5.0494	0.2	5.1565	0.25	5.2159	0.5	5.4639	0.75	5.7319	0.8	5.8013	0.875	5.9325	0.9	5.9915	0.95	6.1546	111	5.4339	1.05185
9	0.05	4.8847	0.1	5.0046	0.125	5.0494	0.2	5.1565	0.25	5.2159	0.5	5.4639	0.75	5.7319	0.8	5.8013	0.875	5.9325	0.9	5.9915	0.95	6.1546	111	5.4339	1.05185
10	0.05	4.8847	0.1	5.0046	0.125	5.0494	0.2	5.1565	0.25	5.2159	0.5	5.4639	0.75	5.7319	0.8	5.8013	0.875	5.9325	0.9	5.9915	0.95	6.1546	111	5.4339	1.05185
11	0.05	4.8847	0.1	5.0046	0.125	5.0494	0.2	5.1565	0.25	5.2159	0.5	5.4639	0.75	5.7319	0.8	5.8013	0.875	5.9325	0.9	5.9915	0.95	6.1546	111	5.4339	1.05185
12	0.05	4.8847	0.1	5.0046	0.125	5.0494	0.2	5.1565	0.25	5.2159	0.5	5.4639	0.75	5.7319	0.8	5.8013	0.875	5.9325	0.9	5.9915	0.95	6.1546	111	5.4339	1.05185
13	0.05	4.8847	0.1	5.0046	0.125	5.0494	0.2	5.1565	0.25	5.2159	0.5	5.4639	0.75	5.7319	0.8	5.8013	0.875	5.9325	0.9	5.9915	0.95	6.1546	111	5.4339	1.05185
14	0.05	4.8847	0.1	5.0046	0.125	5.0494	0.2	5.1565	0.25	5.2159	0.5	5.4639	0.75	5.7319	0.8	5.8013	0.875	5.9325	0.9	5.9915	0.95	6.1546	111	5.4339	1.05185
15	0.05	4.8847	0.1	5.0046	0.125	5.0494	0.2	5.1565	0.25	5.2159	0.5	5.4639	0.75	5.7319	0.8	5.8013	0.875	5.9325	0.9	5.9915	0.95	6.1546	111	5.4339	1.05185
16	0.05	4.8847	0.1	5.0046	0.125	5.0494	0.2	5.1565	0.25	5.2159	0.5	5.4639	0.75	5.7319	0.8	5.8013	0.875	5.9325	0.9	5.9915	0.95	6.1546	111	5.4339	1.05185
17	0.05	4.8847	0.1	5.0046	0.125	5.0494	0.2	5.1565	0.25	5.2159	0.5	5.4639	0.75	5.7319	0.8	5.8013	0.875	5.9325	0.9	5.9915	0.95	6.1546	111	5.4339	1.05185
18	0.05	4.8847	0.1	5.0046	0.125	5.0494	0.2	5.1565	0.25	5.2159	0.5	5.4639	0.75	5.7319	0.8	5.8013	0.875	5.9325	0.9	5.9915	0.95	6.1546	111	5.4339	1.05185
19	0.05	4.8847	0.1	5.0046	0.125	5.0494	0.2	5.1565	0.25	5.2159	0.5	5.4639	0.75	5.7319	0.8	5.8013	0.875	5.9325	0.9	5.9915	0.95	6.1546	111	5.4339	1.05185
20	0.05	4.8847	0.1	5.0046	0.125	5.0494	0.2	5.1565	0.25	5.2159	0.5	5.4639	0.75	5.7319	0.8	5.8013	0.875	5.9325	0.9	5.9915	0.95	6.1546	111	5.4339	1.05185
21	0.05	4.8847	0.1	5.0046	0.125	5.0494	0.2	5.1565	0.25	5.2159	0.5	5.4639	0.75	5.7319	0.8	5.8013	0.875	5.9325	0.9	5.9915	0.95	6.1546	111	5.4339	1.05185
22	0.05	4.8847	0.1	5.0046	0.125	5.0494	0.2	5.1565	0.25	5.2159	0.5	5.4639	0.75	5.7319	0.8	5.8013	0.875	5.9325	0.9	5.9915	0.95	6.1546	111	5.4339	1.05185
23	0.05	4.8847	0.1	5.0046	0.125	5.0494	0.2	5.1565	0.25	5.2159	0.5	5.4639	0.75	5.7319	0.8	5.8013	0.875	5.9325	0.9	5.9915	0.95	6.1546	111	5.4339	1.05185
24	0.05	4.8847	0.1	5.0046	0.125	5.0494	0.2	5.1565	0.25	5.2159	0.5	5.4639	0.75	5.7319	0.8	5.8013	0.875	5.9325	0.9	5.9915	0.95	6.1546	111	5.4339	1.05185
25	0.05	4.8847	0.1	5.0046	0.125	5.0494	0.2	5.1565	0.25	5.2159	0.5	5.4639	0.75	5.7319	0.8	5.8013	0.875	5.9325	0.9	5.9915	0.95	6.1546	111	5.4339	1.05185
26	0.05	4.8847	0.1	5.0046	0.125	5.0494	0.2	5.1565	0.25	5.2159	0.5	5.4639	0.75	5.7319	0.8	5.8013	0.875	5.9325	0.9	5.9915	0.95	6.1546	111	5.4339	1.05185
27	0.05	4.8847	0.1	5.0046	0.125	5.0494	0.2	5.1565	0.25	5.2159	0.5	5.4639	0.75	5.7319	0.8	5.8013	0.875	5.9325	0.9	5.9915	0.95	6.1546	111	5.4339	1.05185
28	0.05	4.8847	0.1	5.0046	0.125	5.0494	0.2	5.1565	0.25	5.2159	0.5	5.4639	0.75	5.7319	0.8	5.8013	0.875	5.9325	0.9	5.9915	0.95	6.1546	111	5.4339	1.05185
29	0.05	4.8847	0.1	5.0046	0.125	5.0494	0.2	5.1565	0.25	5.2159	0.5	5.4639	0.75	5.7319	0.8	5.8013	0.875	5.9325	0.9	5.9915	0.95	6.1546	111	5.4339	1.05185
30	0.05	4.8847	0.1	5.0046	0.125	5.0494	0.2	5.1565	0.25	5.2159	0.5	5.4639	0.75	5.7319	0.8	5.8013	0.875	5.9325	0.9	5.9915	0.95	6.1546	111	5.4339	1.05185
31	0.05	4.8847	0.1	5.0046	0.125	5.0494	0.2	5.1565	0.25	5.2159	0.5	5.4639	0.75	5.7319	0.8	5.8013	0.875	5.9325	0.9	5.9915	0.95	6.1546	111	5.4339	1.05185
32	0.05	4.8847	0.1	5.0046	0.125	5.0494	0.2	5.1565	0.25	5.2159	0.5	5.4639	0.75	5.7319	0.8	5.8013	0.875	5.9325	0.9	5.9915	0.95	6.1546	111	5.4339	1.05185
33	0.05	4.8847	0.1	5.0046	0.125	5.0494	0.2	5.1565	0.25	5.2159	0.5	5.4639	0.75	5.7319	0.8	5.8013	0.875	5.9325	0.9	5.9915	0.95	6.1546	111	5.4339	1.05185
34	0.05	4.8847	0.1	5.0046	0.125	5.0494	0.2	5.1565	0.25	5.2159	0.5	5.4639	0.75	5.7319	0.8	5.8013	0.875	5.9325	0.9	5.9915	0.95	6.1546	111	5.4339	1.05185
35	0.05	4.8847	0.1	5.0046	0.125	5.0494	0.2	5.1565	0.25	5.2159	0.5	5.4639	0.75	5.7319	0.8	5.8013	0.875	5.9325	0.9	5.9915	0.95	6.1546	111	5.4339	1.05185
36	0.05	4.8847	0.1	5.0046	0.125	5.0494	0.2	5.1565	0.25	5.2159	0.5	5.4639	0.75	5.7319	0.8	5.8013	0.875	5.9325	0.9	5.9915	0.95	6.1546	111	5.4339	1.05185
37	0.05	4.8847	0.1	5.0046	0.125	5.0494	0.2	5.1565	0.25	5.2159	0.5	5.4639	0.75	5.7319	0.8	5.8013	0.875	5.9325	0.9	5.9915	0.95	6.1546	111	5.4339	1.05185
38	0.05	4.8847	0.1	5.0046	0.125	5.0494	0.2	5.1565	0.25	5.2159	0.5	5.4639	0.75	5.7319	0.8	5.8013	0.875	5.9325	0.9	5.9915	0.95	6.1546	111	5.4339	1.05185
39	0.05	4.8847	0.1	5.0046	0.125	5.0494	0.2	5.1565	0.25	5.2159	0.5	5.4639	0.75	5.7319	0.8	5.8013	0.875	5.9325	0.9	5.9915	0.95	6.1546	111	5.4339	1.05185
40	0.05	4.8847	0.1	5.0046	0.125	5.0494	0.2	5.1565	0.25	5.2159	0.5	5.4639	0.75	5.7319	0.8	5.8013	0.875	5.9325	0.9	5.9915	0.95	6.1546	111	5.4339	1.05185
41	0.05	4.8847	0.1	5.0046	0.125	5.0494	0.2	5.1565	0.25	5.2159	0.5	5.4639	0.75	5.7319	0.8	5.8013	0.875	5.9325	0.9	5.9915	0.95	6.1546	111	5.4339	1.05185
42	0.05	4.8847	0.1	5.0046	0.125	5.0494	0.2	5.1565	0.25	5.2159	0.5	5.4639	0.75	5.7319	0.8	5.8013	0.875	5.9325	0.9	5.9915	0.95	6.1546	111	5.4339	1.05185
43	0.05	4.8847	0.1	5.0046	0.125	5.0494	0.2	5.1565	0.25	5.2159	0.5	5.4639	0.75	5.7319	0.8	5.8013	0.875	5.9325	0.9	5.9915	0.95	6.1546	111	5.4339	1.05185
44	0.05	4.8847	0.1	5.0046	0.125	5.0494	0.2	5.1565	0.25	5.2159	0.5	5.4639	0.75	5.7319	0.8	5.8013	0.875	5.9325	0.9	5.9915	0.95	6.1546	111	5.4339	1.05185
45	0.05	4.8847	0.1	5.0046	0.125	5.0494	0.2	5.1565	0.25	5.2159	0.5	5.4639	0.75	5.7319	0.8	5.8013	0.875	5.9325	0.9	5.9915	0.95	6.1546	111	5.4339	1.05185
46	0.05	4.8847	0.1	5.0046	0.125	5.0494	0.2	5.1565	0.25	5.2159	0.5	5.4639	0.75	5.7319	0.8	5.8013	0.875	5.9325	0.9	5.9915	0.95	6.1546	111	5.4339	1.05185
47	0.05	4.8847	0.1	5.0046	0.125	5.0494	0.2	5.1565	0.25	5.2159	0.5	5.4639	0.75	5.7319	0.8	5.8013	0.875	5.9325	0.9	5.9915	0.95	6.1546	111	5.4339	1.05185
48	0.05	4.8847	0.1	5.0046	0.125	5.0494	0.2	5.1565	0.25	5.2159	0.5	5.4639	0.75	5.7319	0.8	5.8013	0.875	5.9325	0.9	5.9915	0.95	6.1546	111	5.4339	1.05185
49	0.05	4.8847	0.1	5.0046	0.125	5.0494	0.2	5.1565	0.25	5.2159	0.5	5.4639	0.75	5.7319	0.8	5.8013	0.875	5.9325	0.9	5.9915	0.95	6.1546	111	5.4339	1.05185
50	0.05	4.8847	0.1	5.0046	0.125	5.0494	0.2	5.1565	0.25	5.2159	0.5	5.4639	0.75	5.7319	0.8	5.8013	0.875	5.9325	0.9	5.9915	0.95	6.1546	111	5.4339	1.05185
51	0.05	4.8847	0.1	5.0046	0.125	5.0494	0.2	5.1565	0.25	5.2159	0.5	5.4639	0.75	5.7319	0.8	5.8013	0.875	5.9325	0.9	5.9915	0.95	6.1546	111	5.4339	1.05185
52	0.05	4.8847	0.1	5.0046	0.125	5.0494	0.2	5.1565	0.25	5.2159	0.5	5.4639	0.75	5.7319	0.8	5.8013	0.875	5.9325	0.9	5.9915	0.95	6.1546	111	5.4339	1.05185
53	0.05	4.8847	0.1	5.0046	0.125	5.0494	0.2	5.1565	0.25	5.2159	0.5	5.4639	0.75	5.7319	0.8	5.8013	0.875	5.9325	0.9	5.9915	0.95	6.1546	111	5.4339	1.05185
54	0.05	4.8847	0.1	5.0046	0.125	5.0494	0.2	5.1565	0.25	5.2159	0.5	5.4639	0.75	5.7319	0.8	5.8013	0.875	5.9325	0.9	5.9915	0.95	6.1546	111	5.4339	1.05185
55	0.05	4.8847	0.1	5.0046	0.125	5.0494	0.2	5.1565	0.25	5.2159	0.5	5.4639	0.75	5.7319	0.8	5.8013	0.875	5.9325	0.9	5.9915	0.95	6.1546	111	5.4339	1.05185
56	0.05	4.8847	0.1	5.0046	0.125	5.0494	0.2	5.1565	0.25	5.2159	0.5	5.4639	0.75	5.7319	0.8	5.8013	0.875	5.9325	0.9	5.9915	0.95	6.1546	111	5.4339	1.05185
57	0.05	4.8847	0.1	5.0046	0.125	5.0494	0.2	5.1565	0.25	5.2159	0.5	5.4639	0.75	5.7319	0.8	5.8013	0.875	5.9325	0.9	5.9915	0.95	6.1546	111	5.4339	1.05185
58	0.05	4.8847	0.1	5.0046	0.125	5.0494	0.2	5.1565	0.25	5.2159	0.5	5.4639	0.75	5.7319	0.8	5.8013	0.875	5.9325	0.9	5.9915	0.95	6.1546	111	5.4339	1.05185
59	0.05	4.8847	0.1	5.0046	0.125	5.0494	0.2	5.1565	0.25	5.2159	0.5	5.4639	0.75	5.7319	0.8	5.8013	0.875	5.9325	0.9	5.9915	0.95	6.1546	111	5.4339	1.05185
60	0.05	4.8847	0.1	5.0046	0.125	5.0494	0.2	5.1565	0.25	5.2159	0.5	5.4639	0.75	5.7319	0.8	5.8013	0.875	5.9325	0.9	5.9915	0.95	6.1546	111	5.4339	1.05185
61	0.05	4.8847	0.1	5.0046	0.125	5.0494	0.2	5.1565	0.25	5.2159	0.5	5.4639	0.75	5.7319	0.8	5.8013	0.875	5.9325	0.9	5.9915	0.95	6.1546	111	5.4339	1.05185
62	0.05	4.8847	0.1	5.0046	0.125	5.0494	0.2	5.1565	0.25	5.2159	0.5	5.4639	0.75	5.7319	0.8	5.8013	0.875	5.9325	0.9	5.9915	0.95	6.1546	111	5.4339	1.05185
63	0.05	4.8847	0.1	5.0046	0.125	5.0494	0.2	5.1565	0.25	5.2159	0.5	5.4639	0.75	5.7319	0.8	5.8013	0.875	5.9325	0.9	5.9915	0.95	6.1546	111	5.4339	1.05185
64	0.05	4.8847	0.1	5.0046	0.125	5.0494	0.2	5.1565	0.25	5.2159	0.5	5.4639	0.75	5.7319	0.8	5.8013	0.875	5.9325	0.9	5.9915	0.95	6.1546	111	5.4339	1.05185
65	0.05	4.8847	0.1	5.0046	0.125	5.0494	0.2	5.1565	0.25	5.2159	0.5	5.4639	0.75	5.7319	0.8	5.8013	0.875	5.9325	0.9	5.9915	0.95	6.1546	111	5.4339	1.05185
66	0.05	4.8847	0.1	5.0046	0.125	5.0494	0.2	5.1565	0.25	5.2159	0.5	5.4639	0.75	5.7319	0.8	5.8013	0.875	5.9325	0.9	5.9915	0.95	6.1546	111	5.4339	1.05185
67	0.05	4.8847	0.1	5.0046	0.125	5.0494	0.2	5.1565	0.25	5.2159	0.5	5.4639	0.75	5.7319	0.8	5.8013	0.875	5.9325	0.9	5.9915	0.95	6.1546	111	5.4339	1.05185
68	0.05	4.8847	0.1	5.0046	0.125	5.0494	0.2	5.1565	0.25	5.2159	0.5	5.4639	0.75	5.7319	0.8	5.8013	0.875	5.9325	0.9	5.9915	0.95	6.1546	111	5.4339	1.05185
69	0.05	4.8847	0.1	5.0046	0.125	5.0494	0.2	5.1565	0.25	5.2159	0.5	5.4639	0.75	5.7319	0.8	5.8013	0.875	5.9325	0.9	5.9915	0.95	6.1546	111	5.4339	1.05185
70	0.05	4.8847	0.1	5.0046	0.125	5.0494	0.2	5.1565	0.25	5.2159	0.5	5.4639	0.75	5.7319	0.8	5.8013	0.875	5.9325	0.9	5.9915	0.95	6.1546	111	5.4339	1.05185
71	0.05	4.8847	0.1	5.0046	0.125	5.0494	0.2	5.1565	0.25	5.2159	0.5	5.4639	0.75	5.7319	0.8	5.8013	0.875	5.9325	0.9	5.9915	0.95	6.1546	111	5.4339	1.05185
72	0.05	4.8847	0.1	5.0046	0.125	5.0494	0.2	5.1565	0.25	5.2159	0.5	5.4639	0.75	5.7319	0.8	5.8013	0.875	5.9325	0.9	5.9915	0.95	6.1546	111	5.4339	1.05185
73	0.05	4.8847	0.1	5.0046	0.125	5.0494	0.2	5.1565	0.25	5.2159	0.5	5.4639	0.75	5.7319	0.8	5.8013	0.875	5.9325	0.9	5.9915	0.95	6.1546	111	5.4339	1.05185
74	0.05	4.8847	0.1	5.0046	0.125	5.0494	0.2	5.1565	0.25	5.2159	0.5	5.4639	0.75	5.7319	0.8	5.8013	0.875	5.9325	0.9	5.9915	0.95	6.1546	111	5.4339	1.05185
75	0.05	4.8847	0.1	5.0046	0.125	5.0494	0.2	5.1565	0.25	5.2159	0.5	5.4639	0.75	5.7319	0.8	5.8013	0.875	5.9325	0.9	5.9915	0.95	6.1546	111	5.4339	1.05185
76	0.05	4.8847	0.1	5.0046	0.125	5.0494	0.2	5.1565	0.25	5.2159	0.5	5.4639	0.75	5.7319	0.8	5.8013	0.875	5.9325	0.9	5.9915	0.95	6.1546	111	5.4339	1.05185
77	0.05	4.8847	0.1	5.0046	0.125	5.0494	0.2	5.1565	0.25	5.2159	0.5	5.4639	0.75	5.7319	0.8	5.8013	0.875	5.9325	0.9	5.9915	0.95	6.1546	111	5.4339	1.05185
78	0.05	4.8847	0.1	5.0046	0.125	5.0494	0.2	5.1565	0.25	5.2159	0.5	5.4639	0.75	5.7319	0.8	5.8013	0.875	5.9325	0.9	5.9915	0.95	6.1546	111	5.4339	1.05185
79	0.05	4.8847	0.1	5.0046	0.125	5.0494	0.2	5.1565	0.25	5.2159	0.5	5.4639	0.75	5.7319	0.8	5.8013	0.875	5.9325	0.9	5.9915	0.95	6.1546	111	5.4339	1.05185
80	0.05	4.8847	0.1	5.0046	0.125	5.0494	0.2	5.1565	0.25	5.2159	0.5	5.4639	0.75	5.7319	0.8	5.8013	0.875	5.9325	0.9	5.9915	0.95	6.1546	111	5.4339	1.05185
81	0.05	4.8847	0.1	5.0046	0.125	5.0494	0.2	5.1565	0.25	5.2159	0.5	5.4639	0.75	5.7319	0.8	5.8013	0.875	5.9325	0.9	5.9915	0.95	6.1546	111	5.4339	1.05185
82	0.05	4.8847	0.1	5.0046	0.125	5.0494	0.2	5.1565	0.25	5.2159	0.5	5.4639	0.75	5.7319	0.8	5.8013	0.875	5.9325	0.9	5.9915	0.95	6.1546	111	5.4339	1.05185
83	0.05	4.8847	0.1	5.0046	0.125	5.0494	0.2	5.1565	0.25	5.2159	0.5	5.4639	0.75	5.7319	0.8	5.8013	0.875	5.9325	0.9	5.9915	0.95	6.1546	111	5.4339	1.05185
84	0.05	4.8847	0.1	5.0046	0.125	5.0494	0.2	5.1565	0.25	5.2159	0.5	5.4639	0.75	5.7319	0.8	5.8013	0.875	5.9325	0.9	5.9915	0.95	6.1546	111	5.4339	1.05185
85	0.05	4.8847	0.1	5.0046	0.125	5.0494	0.2	5.1565	0.25	5.2159	0.5	5.4639	0.75	5.7319	0.8	5.8013	0.875	5.9325	0.9	5.9915	0.95	6.1546	111	5.4339	1.05185
86	0.05	4.8847	0.1	5.0046	0.125	5.0494	0.2	5.1565	0.25	5.2159	0.5	5.4639	0.75	5.7319	0.8	5.8013	0.875	5.9325	0.9	5.9915	0.95	6.1546	111	5.4339	1.05185
87	0.05	4.8847	0.1	5.0046	0.125	5.0494	0.2	5.1565	0.25	5.2159	0.5	5.4639	0.75	5.7319	0.8	5.8013	0.875	5.9325	0.9	5.9915	0.95	6.1546	111	5.4339	1.05185
88	0.05	4.8847	0.1	5.0046	0.125	5.0494	0.2	5.1565	0.25	5.2159	0.5	5.4639	0.75	5.7319	0.8	5.8013	0.875	5.9325	0.9	5.9915	0.95	6.1546	111	5.4339	1.05185
89	0.05	4.8847	0.1	5.0046	0.125	5.0494	0.2	5.1565	0.25	5.2159	0.5	5.4639	0.75	5.7319	0.8	5.8013	0.875	5.9325	0.9	5.9915	0.95	6.1546	111	5.4339	1.05185
90	0.05	4.8847	0.1	5.0046	0.125	5.0494	0.2	5.1565	0.25	5.2159	0.5	5.4639	0.75	5.7319	0.8	5.8013	0.875	5.9325	0.9	5.9915	0.95	6.1546	111	5.4339	1.05185
91	0.05	4.8847	0.1	5.0046	0.125	5.0494	0.2	5.1565	0.25	5.2159	0.5	5.4639	0.75	5.7319	0.8	5.8013	0.875	5.9325	0.9	5.9915	0.95	6.1546	111	5.4339	1.05185
92	0.05	4.8847	0.1	5.0046	0.125	5.0494	0.2	5.1565	0.25	5.2159	0.5	5.4639	0.75	5.7319	0.8	5.8013	0.875	5.9325	0.9	5.9915	0.95	6.1546	111	5.4339	1.05185
93	0.05	4.8847	0.1	5.0046	0.125	5.0494	0.2	5.1565	0.25	5.2159	0.5	5.4639	0.75	5.7319	0.8	5.8013	0.875	5.9325	0.9	5.9915	0.95	6.1546	111	5.4339	1.05185
94	0.05	4.8847	0.1	5.0046	0.125	5.0494	0.2	5.1565	0.25	5.2159	0.5	5.4639	0.75	5.7319	0.8	5.8013	0.875	5.9325	0.9	5.9915	0.95	6.1546	111	5.4339	1.05185
95	0.05	4.8847	0.1	5.0046	0.125	5.0494	0.2	5.1565	0.25	5.2159	0.5	5.4639	0.75	5.7319	0.8	5.8013	0.875	5.9325	0.9	5.9915	0.95	6.1546	111	5.4339	1.05185
96	0.05	4.8847	0.1	5.0046	0.125	5.0494	0.2	5.1565	0.25	5.2159	0.5	5.4639	0.75	5.7319	0.8	5.8013	0.875	5.9325	0.9	5.9915	0.95	6.1546	111	5.4339	1.05185
97	0.05	4.8847	0.1	5.0046	0.125	5.0494	0.2	5.1565	0.25	5.2159	0.5	5.4639	0.75	5.7319	0.8	5.8013	0.875	5.9325	0.9	5.9915	0.95	6.1546	111	5.4339	1.05185
98	0.05	4.8847	0.1	5.0046	0.125	5.0494	0.2	5.1565	0.25	5.2159	0.5	5.4639	0.75	5.7319	0.8	5.8013	0.875	5.9325	0.9	5.9915	0.95	6.1546	111	5.4339	1.05185
99	0.05	4.8847	0.1	5.0046	0.125	5.0494	0.2	5.1565	0.25	5.2159	0.5	5.4639	0.75	5.7319	0.8	5.8013	0.875	5.9325	0.9	5.9915	0.95	6.1546	111	5.4339	1.05185
100	0.05	4.8847	0.1	5.0046	0.125	5.0494	0.2	5.1565	0.25	5.2159	0.5	5.4639	0.75	5.7319	0.8	5.8013	0.875	5.9325	0.9	5.9915	0.95	6.1546	111	5.4339	1.05185
101	0.05	4.8847	0.1	5.0046	0.125	5.0494	0.2	5.1565	0.25	5.2159	0.5	5.4639	0.75	5.7319	0.8	5.8013	0.875	5.9325	0.9	5.9915	0.95	6.1546	111	5.4339	1.05185
102	0.05	4.8847	0.1	5.0046	0.125	5.0494	0.2	5.1565	0.25	5.2159	0.5	5.4639	0.75	5.7319	0.8	5.8013	0.875	5.9325	0.9	5.9915	0.95	6.1546	111	5.4339	1.05185
103	0.05	4.8847	0.1	5.0046	0.125	5.0494	0.2	5.1565	0.25	5.2159	0.5	5.4639	0.75	5.7319	0.8	5.8013	0.875	5.9325	0.9	5.9915	0.95	6.1546	111	5.4339	1.05185
104	0.05	4.8847	0.1	5.0046	0.125	5.0494	0.2	5.1565	0.25	5.2159	0.5	5.4639	0.75	5.7319	0.8	5.8013	0.875	5.9325	0.9	5.9915	0.95	6.1546	111	5.4339	1.05185
105	0.05	4.8847	0.1	5.0046	0.125	5.0494	0.2	5.1565	0.25	5.2159	0.5	5.4639	0.75	5.7319	0.8	5.8013	0.875	5.9325	0.9	5.9915	0.95	6.1546	111	5.4339	1.05185
106	0.05	4.8847	0.1	5.0046	0.125	5.0494	0.2	5.1565	0.25	5.2159	0.5	5.4639	0.75	5.7319	0.8	5.8013	0.875	5.9325	0.9	5.9915	0.95	6.1546	111	5.4339	1.05185
107	0.05	4.8847	0.1	5.0046	0.125	5.0494	0.2	5.1565	0.25	5.2159	0.5	5.4639	0.75	5.7319	0.8	5.8013	0.875	5.9325	0.9	5.9915	0.95	6.1546	111	5.4339	1.05185
108	0.05	4.8847	0.1	5.0046	0.125	5.0494	0.2	5.1565	0.25	5.2159	0.5	5.4639	0.75	5.7319	0.8	5.8013	0.875	5.9325	0.9	5.9915	0.95	6.1546	111	5.4339	1.05185
109	0.05	4.8847	0.1	5.0046	0.125	5.0494	0.2	5.1565	0.25	5.2159	0.5	5.4639	0.75	5.7319	0.8	5.8013	0.875	5.9325	0.9	5.9915	0.95	6.1546	111	5.4339	1.05185
110	0.05	4.8847	0.1	5.0046	0.125	5.0494	0.2	5.1565	0.25	5.2159	0.5	5.4639	0.75	5.7319	0.8	5.8013	0.875	5.9325	0.9	5.9915	0.95	6.1546	111	5.4339	1.05185
111	0.05	4.8847	0.1	5.0046	0.125	5.0494	0.2	5.1565	0.25	5.2159	0.5	5.4639	0.75	5.7319	0.8	5.8013	0.875	5.9325	0.9	5.9915	0.95	6.1546	111	5.4339	1.05185
112	0.05	4.8847	0.1	5.0046	0.125	5.0494	0.2	5.1565	0.25	5.2159	0.5	5.4639	0.75	5.7319	0.8	5.8013	0.875	5.9325	0.9	5.9915	0.95	6.1546	111	5.4339	1.05185
113	0.05	4.8847	0.1	5.0046	0.125	5.0494	0.2	5.1565	0.25	5.2159	0.5	5.4639	0.75	5.7319	0.8	5.8013	0.875	5.9325	0.9	5.9915	0.95	6.1546	111	5.4339	1.05185
114	0.05	4.8847	0.1	5.0046	0.125	5.0494	0.2	5.1565	0.25	5.2159	0.5	5.4639	0.75	5.7319	0.8	5.8013	0.875	5.9325	0.9	5.9915	0.95	6.1546	111	5.4339	1.05185
115	0.05	4.8847	0.1	5.0046	0.125	5.0494	0.2	5.1565	0.25	5.2159	0.5	5.4639	0.75	5.7319	0.8	5.8013	0.875	5.9325	0.9	5.9915	0.95	6.1546	111	5.4339	1.05185
116	0.05	4.8847	0.1	5.0046	0.125	5.0494	0.2	5.1565	0.25	5.2159	0.5	5.4639	0.75	5.7319	0.8	5.8013	0.875	5.9325	0.9	5.9915	0.95	6.1546	111	5.4339	1.05185
117	0.05	4.8847	0.1	5.0046	0.125	5.0494	0.2	5.1565	0.25	5.2159	0.5	5.4639	0.75	5.7319	0.8	5.8013	0.875	5.9325	0.9	5.9915	0.95	6.1546	111	5.4339	1.05185
118	0.05	4.8847	0.1	5.0046	0.125	5.0494	0.2	5.1565	0.25	5.2159	0.5	5.4639	0.75	5.7319	0.8	5.8013	0.875	5.9325	0.9	5.9915	0.95	6.1546	111	5.4339	1.05185
119	0.05	4.8847	0.1	5.0046	0.125	5.0494	0.2	5.1565	0.25	5.2159	0.5	5.4639	0.75	5.7319	0.8	5.8013	0.875	5.9325	0.9	5.9915	0.95	6.1546	111	5.4339	1.05185
120	0.05	4.8847	0.1	5.0046	0.125	5.0494	0.2	5.1565	0.25	5.2159	0.5	5.4639	0.75	5.7319	0.8	5.8013	0.875	5.9325	0.9	5.9915	0.95	6.1546	111	5.4339	1.05185
121	0.05	4.8847	0.1	5.0046	0.125	5.0494	0.2	5.1565	0.25	5.2159	0.5	5.4639	0.75	5.7319	0.8	5.8013	0.875	5.9325	0.9	5.9915	0.95	6.1546	111	5.4339	1.05185
122	0.05	4.8847	0.1	5.0046	0.125	5.0494	0.2	5.1565	0.25	5.2159	0.5	5.4639	0.75	5.7319	0.8	5.8013	0.875	5.9325	0.9	5.9915	0.95	6.1546	111	5.4339	1.05185
123	0.05	4.8847	0.1	5.0046	0.125	5.0494	0.2	5.1565	0.25	5.2159	0.5	5.4639	0.75	5.7319	0.8	5.8013	0.875	5.9325	0.9	5.9915	0.95	6.1546	111	5.4339	1.05185
124	0.05	4.8847	0.1	5.0046	0.125	5.0494	0.2	5.1565	0.25	5.2159	0.5	5.4639	0.75	5.7319	0.8	5.8013	0.875	5.9325	0.9	5.9915	0.95	6.1546	111	5.4339	1.05185
125	0.05	4.8847	0.1	5.0046	0.125	5.0494	0.2	5.1565	0.25	5.2159	0.5	5.4639	0.75	5.7319	0.8	5.8013	0.875	5.9325	0.9	5.9915	0.95	6.1546	111	5.4339	1.05185
126	0.05	4.8847	0.1	5.0046	0.125	5.0494	0.2	5.1565	0.25	5.2159	0.5	5.4639	0.75	5.7319	0.8	5.8013	0.875	5.9325	0.9	5.9915	0.95	6.1546	111	5.4339	1.05185
127	0.05	4.8847	0.1	5.0046	0.125	5.0494	0.2	5.1565	0.25	5.2159	0.5	5.4639	0.75	5.7319	0.8	5.8013	0.875	5.9325	0.9	5.9915	0.95	6.1546	111	5.4339	1.05185
128	0.05	4.8847	0.1	5.0046	0.125	5.0494	0.2	5.1565	0.25	5.2159	0.5	5.4639	0.75	5.7319	0.8	5.8013	0.875	5.9325	0.9	5.9915	0.95	6.1546	111	5.4339	1.05185
129	0.05	4.8847	0.1	5.0046	0.125	5.0494	0.2	5.1565	0.25	5.2159	0.5	5.4639	0.75	5.7319	0.8	5.8013	0.875	5.9325	0.9	5.9915	0.95	6.1546	111	5.4339	1.05185
130	0.05	4.8847	0.1	5.0046	0.125	5.0494	0.2	5.1565	0.25	5.2159	0.5	5.4639	0.75	5.7319	0.8	5.8013	0.875	5.9325	0.9	5.9915	0.95	6.1546	111	5.4339	1.05185
131	0.05	4.8847	0.1	5.0046	0.125	5.0494	0.2	5.1565	0.25	5.2159	0.5	5.4639	0.75	5.7319	0.8	5.8013	0.875	5.9325	0.9	5.9915	0.95	6.1546	111	5.4339	1.05185
132	0.05	4.8847	0.1	5.0046	0.125	5.0494	0.2	5.1565	0.25	5.2159	0.5	5.4639	0.75	5.7319	0.8	5.8013	0.875	5.9325	0.9	5.9915	0.95	6.1546	111	5.4339	1.05185
133	0.05	4.8847	0.1	5.0046	0.125	5.0494	0.2	5.1565	0.25	5.2159	0.5	5.4639	0.75	5.7319	0.8	5.8013	0.875	5.9325	0.9	5.9915	0.95	6.1546	111	5.4339	1.05185
134	0.05	4.8847	0.1	5.0046	0.125	5.0494	0.2	5.1565	0.25	5.2159	0.5	5.4639	0.75	5.7319	0.8	5.8013	0.875	5.9325	0.9	5.9915	0.95	6.1546	111	5.4339	1.05185
135	0.05	4.8847	0.1	5.0046	0.125	5.0494	0.2	5.1565	0.25	5.2159	0.5	5.4639	0.75	5.7319	0.8	5.8013	0.875	5.9325	0.9	5.9915	0.95	6.1546	111	5.4339	1.05185
136	0.05	4.8847	0.1	5.0046	0.125	5.0494	0.2	5.1565	0.25	5.2159	0.5	5.4639	0.75	5.7319	0.8	5.8013	0.875	5.9325	0.9	5.9915	0.95	6.1546	111	5.4339	1.05185
137	0.05	4.8847	0.1	5.0046	0.125	5.0494	0.2	5.1565	0.25	5.2159	0.5	5.4639	0.75	5.7319	0.8	5.8013	0.875	5.9325	0.9	5.9915	0.95	6.1546	111	5.4339	1.05185
138	0.05	4.8847	0.1	5.0046	0.125	5.0494	0.2	5.1565	0.25	5.2159	0.5	5.4639	0.75	5.7319	0.8	5.8013	0.875	5.9325	0.9	5.9915	0.95	6.1546	111	5.4339	1.05185
139	0.05	4.8847	0.1	5.0046	0.125	5.0494	0.2	5.1565	0.25	5.2159	0.5	5.4639	0.75	5.7319	0.8	5.8013	0.875	5.9325	0.9	5.9915	0.95	6.1546	111	5.4339	1.05185
140	0.05	4.8847	0.1	5.0046	0.125	5.0494	0.2	5.1565	0.25	5.2159	0.5	5.4639	0.75	5.7319	0.8	5.8013	0.875	5.9325	0.9	5.9915	0.95	6.1546	111	5.4339	1.05185
141	0.05	4.8847	0.1	5.0046	0.125	5.0494	0.2	5.1565	0.25	5.2159	0.5	5.4639	0.75	5.7319	0.8	5.8013	0.875	5.9325	0.9	5.9915	0.95	6.1546	111	5.4339	1.05185
142	0.05	4.8847	0.1	5.0046	0.125	5.0494	0.2	5.1565	0.25	5.2159	0.5	5.4639	0.75	5.7319	0.8	5.8013	0.875	5.9325	0.9	5.9915	0.95	6.1546	111	5.4339	1.05185
143	0.05	4.8847	0.1	5.0046	0.125	5.0494	0.2	5.1565	0.25	5.2159	0.5	5.4639	0.75	5.7319	0.8	5.8013	0.875	5.9325	0.9	5.9915	0.95	6.1546	111	5.4339	1.05185
144	0.05	4.8847	0.1	5.0046	0.125	5.0494	0.2	5.1565	0.25	5.2159	0.5	5.4639	0.75	5.7319	0.8	5.8013	0.875	5.9325	0.9	5.9915	0.95	6.1546	111	5.4339	1.05185
145	0.05	4.8847	0.1	5.0046	0.125	5.0494	0.2	5.1565	0.25	5.2159	0.5	5.4639	0.75	5.7319	0.8	5.8013	0.875	5.9325	0.9	5.9915	0.95	6.1546	111	5.4339	1.05185
146	0.05	4.8847	0.1	5.0046	0.125	5.0494	0.2	5.1565	0.25	5.2159	0.5	5.4639	0.75	5.7319	0.8	5.8013	0.875	5.9325	0.9	5.9915	0.95	6.1546	111	5.4339	1.05185
147	0.05	4.8847	0.1	5.0046	0.125	5.0494	0.2	5.1565	0.25	5.2159	0.5	5.4639	0.75	5.7319	0.8	5.8013	0.875	5.9325	0.9	5.9915	0.95	6.1546	111	5.4339	1.05185
148	0.05	4.8847	0.1	5.0046	0.125	5.0494	0.2	5.1565	0.25	5.2159	0.5	5.4639	0.75	5.7319	0.8	5.8013	0.875	5.9325	0.9	5.9915	0.95	6.1546	111	5.4339	1.05185
149	0.05	4.8847	0.1	5.0046	0.125	5.0494	0.2	5.1565	0.25	5.2159	0.5	5.4639	0.75	5.7319	0.8	5.8013	0.875	5.9325	0.9	5.9915	0.95	6.1546	111	5.4339	1.05185
150	0.05	4.8847	0.1	5.0046	0.125	5.0494	0.2	5.1565	0.25	5.2159	0.5	5.4639	0.75	5.7319	0.8	5.8013	0.875	5.9325	0.9	5.9915	0.95	6.1546	111	5.4339	1.05185
151	0.05	4.8847	0.1	5.0046	0.125	5.0494	0.2	5.1565	0.25	5.2159	0.5	5.4639	0.75	5.7319	0.8	5.8013	0.875	5.9325	0.9	5.9915	0.95	6.1546	111	5.4339	1.05185
152	0.05	4.8847	0.1	5.0046	0.125	5.0494	0.2	5.1565	0.25	5.2159	0.5	5.4639	0.75	5.7319	0.8	5.8013	0.875	5.9325	0.9	5.9915	0.95	6.1546	111	5.4339	1.05185
153	0.05	4.8847	0.1	5.0046	0.125	5.0494	0.2	5.1565	0.25	5.2159	0.5	5.4639	0.75	5.7319	0.8	5.8013	0.875	5.9325	0.9	5.9915	0.95	6.1546	111	5.4339	1.05185
154	0.05	4.8847	0.1	5.0046	0.125	5.0494	0.2	5.1565	0.25	5.2159	0.5	5.4639	0.75	5.7319	0.8	5.8013	0.875	5.9325	0.9	5.9915	0.95	6.1546	111	5.4339	1.05185
155	0.05	4.8847	0.1	5.0046	0.125	5.0494	0.2	5.1565	0.25	5.2159	0.5	5.4639	0.75	5.7319	0.8	5.8013	0.875	5.9325	0.9	5.9915	0.95	6.1546	111	5.4339	1.05185
156	0.05	4.8847	0.1	5.0046	0.125	5.0494	0.2	5.1565	0.25	5.2159	0.5	5.4639	0.75	5.7319	0.8	5.8013	0.875	5.9325	0.9	5.9915	0.95	6.1546	111	5.4339	1.05185
157	0.05	4.8847	0.1	5.0046	0.125	5.0494	0.2	5.1565	0.25	5.2159	0.5	5.4639	0.75	5.7319	0.8	5.8013	0.875	5.9325	0.9	5.9915	0.95	6.1546	111	5.4339	1.05185
158	0.05	4.8847	0.1	5.0046	0.125	5.0494	0.2	5.1565	0.25	5.2159	0.5	5.4639	0.75	5.7319	0.8	5.8013	0.875	5.9325	0.9	5.9915	0.95	6.1546	111	5.4339	1.05185
