# Supplementary material for: Time-varying asymmetry and tail thickness in long series of daily financial returns
Source: publisher site journal article supplement (doi:10.1515/snde-2017-0071), 2018-10-02
Supplement: Supplementary file 63 [file thres_ni2.xlsx]

## Sheet: 1
	Var1	Var2	Var3	Var4	Var5	Var6	Var7	Var8	Var9	Var10	Var11	Var12	Var13	Var14	Var15	Var16	Var17	Var18	Var19	Var20	Var21	Var22	Var23	Var24	Var25
1	0	0	0	0	0	0	0	0	0	0	0	0	0	0	0	0	0	0	0	0	0	0	0	0	0
2	0.05	6.5005	0.1	6.7105	0.125	6.7915	0.2	6.9855	0.25	7.0975	0.5	7.5675	0.75	8.071	0.8	8.213	0.875	8.4745	0.9	8.583	0.95	8.9035	111	7.5435	0.55198
3	0.05	6.5005	0.1	6.7105	0.125	6.7915	0.2	6.9855	0.25	7.0975	0.5	7.5675	0.75	8.071	0.8	8.213	0.875	8.4745	0.9	8.583	0.95	8.9035	111	7.5435	0.55198
4	0.05	6.5005	0.1	6.7105	0.125	6.7915	0.2	6.9855	0.25	7.0975	0.5	7.5675	0.75	8.071	0.8	8.213	0.875	8.4745	0.9	8.583	0.95	8.9035	111	7.5435	0.55198
5	0.05	6.5005	0.1	6.7105	0.125	6.7915	0.2	6.9855	0.25	7.0975	0.5	7.5675	0.75	8.071	0.8	8.213	0.875	8.4745	0.9	8.583	0.95	8.9035	111	7.5435	0.55198
6	0.05	6.5005	0.1	6.7105	0.125	6.7915	0.2	6.9855	0.25	7.0975	0.5	7.5675	0.75	8.071	0.8	8.213	0.875	8.4745	0.9	8.583	0.95	8.9035	111	7.5435	0.55198
7	0.05	6.5005	0.1	6.7105	0.125	6.7915	0.2	6.9855	0.25	7.0975	0.5	7.5675	0.75	8.071	0.8	8.213	0.875	8.4745	0.9	8.583	0.95	8.9035	111	7.5435	0.55198
8	0.05	6.5005	0.1	6.7105	0.125	6.7915	0.2	6.9855	0.25	7.0975	0.5	7.5675	0.75	8.071	0.8	8.213	0.875	8.4745	0.9	8.583	0.95	8.9035	111	7.5435	0.55198
9	0.05	6.5005	0.1	6.7105	0.125	6.7915	0.2	6.9855	0.25	7.0975	0.5	7.5675	0.75	8.071	0.8	8.213	0.875	8.4745	0.9	8.583	0.95	8.9035	111	7.5435	0.55198
10	0.05	6.5005	0.1	6.7105	0.125	6.7915	0.2	6.9855	0.25	7.0975	0.5	7.5675	0.75	8.071	0.8	8.213	0.875	8.4745	0.9	8.583	0.95	8.9035	111	7.5435	0.55198
11	0.05	6.5005	0.1	6.7105	0.125	6.7915	0.2	6.9855	0.25	7.0975	0.5	7.5675	0.75	8.071	0.8	8.213	0.875	8.4745	0.9	8.583	0.95	8.9035	111	7.5435	0.55198
12	0.05	6.5005	0.1	6.7105	0.125	6.7915	0.2	6.9855	0.25	7.0975	0.5	7.5675	0.75	8.071	0.8	8.213	0.875	8.4745	0.9	8.583	0.95	8.9035	111	7.5435	0.55198
13	0.05	6.5005	0.1	6.7105	0.125	6.7915	0.2	6.9855	0.25	7.0975	0.5	7.5675	0.75	8.071	0.8	8.213	0.875	8.4745	0.9	8.583	0.95	8.9035	111	7.5435	0.55198
14	0.05	6.5005	0.1	6.7105	0.125	6.7915	0.2	6.9855	0.25	7.0975	0.5	7.5675	0.75	8.071	0.8	8.213	0.875	8.4745	0.9	8.583	0.95	8.9035	111	7.5435	0.55198
15	0.05	6.5005	0.1	6.7105	0.125	6.7915	0.2	6.9855	0.25	7.0975	0.5	7.5675	0.75	8.071	0.8	8.213	0.875	8.4745	0.9	8.583	0.95	8.9035	111	7.5435	0.55198
16	0.05	6.5005	0.1	6.7105	0.125	6.7915	0.2	6.9855	0.25	7.0975	0.5	7.5675	0.75	8.071	0.8	8.213	0.875	8.4745	0.9	8.583	0.95	8.9035	111	7.5435	0.55198
17	0.05	6.5005	0.1	6.7105	0.125	6.7915	0.2	6.9855	0.25	7.0975	0.5	7.5675	0.75	8.071	0.8	8.213	0.875	8.4745	0.9	8.583	0.95	8.9035	111	7.5435	0.55198
18	0.05	6.5005	0.1	6.7105	0.125	6.7915	0.2	6.9855	0.25	7.0975	0.5	7.5675	0.75	8.071	0.8	8.213	0.875	8.4745	0.9	8.583	0.95	8.9035	111	7.5435	0.55198
19	0.05	6.5005	0.1	6.7105	0.125	6.7915	0.2	6.9855	0.25	7.0975	0.5	7.5675	0.75	8.071	0.8	8.213	0.875	8.4745	0.9	8.583	0.95	8.9035	111	7.5435	0.55198
20	0.05	6.5005	0.1	6.7105	0.125	6.7915	0.2	6.9855	0.25	7.0975	0.5	7.5675	0.75	8.071	0.8	8.213	0.875	8.4745	0.9	8.583	0.95	8.9035	111	7.5435	0.55198
21	0.05	6.5005	0.1	6.7105	0.125	6.7915	0.2	6.9855	0.25	7.0975	0.5	7.5675	0.75	8.071	0.8	8.213	0.875	8.4745	0.9	8.583	0.95	8.9035	111	7.5435	0.55198
22	0.05	6.5005	0.1	6.7105	0.125	6.7915	0.2	6.9855	0.25	7.0975	0.5	7.5675	0.75	8.071	0.8	8.213	0.875	8.4745	0.9	8.583	0.95	8.9035	111	7.5435	0.55198
23	0.05	6.5005	0.1	6.7105	0.125	6.7915	0.2	6.9855	0.25	7.0975	0.5	7.5675	0.75	8.071	0.8	8.213	0.875	8.4745	0.9	8.583	0.95	8.9035	111	7.5435	0.55198
24	0.05	6.5005	0.1	6.7105	0.125	6.7915	0.2	6.9855	0.25	7.0975	0.5	7.5675	0.75	8.071	0.8	8.213	0.875	8.4745	0.9	8.583	0.95	8.9035	111	7.5435	0.55198
25	0.05	6.5005	0.1	6.7105	0.125	6.7915	0.2	6.9855	0.25	7.0975	0.5	7.5675	0.75	8.071	0.8	8.213	0.875	8.4745	0.9	8.583	0.95	8.9035	111	7.5435	0.55198
26	0.05	6.5005	0.1	6.7105	0.125	6.7915	0.2	6.9855	0.25	7.0975	0.5	7.5675	0.75	8.071	0.8	8.213	0.875	8.4745	0.9	8.583	0.95	8.9035	111	7.5435	0.55198
27	0.05	6.5005	0.1	6.7105	0.125	6.7915	0.2	6.9855	0.25	7.0975	0.5	7.5675	0.75	8.071	0.8	8.213	0.875	8.4745	0.9	8.583	0.95	8.9035	111	7.5435	0.55198
28	0.05	6.5005	0.1	6.7105	0.125	6.7915	0.2	6.9855	0.25	7.0975	0.5	7.5675	0.75	8.071	0.8	8.213	0.875	8.4745	0.9	8.583	0.95	8.9035	111	7.5435	0.55198
29	0.05	6.5005	0.1	6.7105	0.125	6.7915	0.2	6.9855	0.25	7.0975	0.5	7.5675	0.75	8.071	0.8	8.213	0.875	8.4745	0.9	8.583	0.95	8.9035	111	7.5435	0.55198
30	0.05	6.5005	0.1	6.7105	0.125	6.7915	0.2	6.9855	0.25	7.0975	0.5	7.5675	0.75	8.071	0.8	8.213	0.875	8.4745	0.9	8.583	0.95	8.9035	111	7.5435	0.55198
31	0.05	6.5005	0.1	6.7105	0.125	6.7915	0.2	6.9855	0.25	7.0975	0.5	7.5675	0.75	8.071	0.8	8.213	0.875	8.4745	0.9	8.583	0.95	8.9035	111	7.5435	0.55198
32	0.05	6.5005	0.1	6.7105	0.125	6.7915	0.2	6.9855	0.25	7.0975	0.5	7.5675	0.75	8.071	0.8	8.213	0.875	8.4745	0.9	8.583	0.95	8.9035	111	7.5435	0.55198
33	0.05	6.5005	0.1	6.7105	0.125	6.7915	0.2	6.9855	0.25	7.0975	0.5	7.5675	0.75	8.071	0.8	8.213	0.875	8.4745	0.9	8.583	0.95	8.9035	111	7.5435	0.55198
34	0.05	6.5005	0.1	6.7105	0.125	6.7915	0.2	6.9855	0.25	7.0975	0.5	7.5675	0.75	8.071	0.8	8.213	0.875	8.4745	0.9	8.583	0.95	8.9035	111	7.5435	0.55198
35	0.05	6.5005	0.1	6.7105	0.125	6.7915	0.2	6.9855	0.25	7.0975	0.5	7.5675	0.75	8.071	0.8	8.213	0.875	8.4745	0.9	8.583	0.95	8.9035	111	7.5435	0.55198
36	0.05	6.5005	0.1	6.7105	0.125	6.7915	0.2	6.9855	0.25	7.0975	0.5	7.5675	0.75	8.071	0.8	8.213	0.875	8.4745	0.9	8.583	0.95	8.9035	111	7.5435	0.55198
37	0.05	6.5005	0.1	6.7105	0.125	6.7915	0.2	6.9855	0.25	7.0975	0.5	7.5675	0.75	8.071	0.8	8.213	0.875	8.4745	0.9	8.583	0.95	8.9035	111	7.5435	0.55198
38	0.05	6.5005	0.1	6.7105	0.125	6.7915	0.2	6.9855	0.25	7.0975	0.5	7.5675	0.75	8.071	0.8	8.213	0.875	8.4745	0.9	8.583	0.95	8.9035	111	7.5435	0.55198
39	0.05	6.5005	0.1	6.7105	0.125	6.7915	0.2	6.9855	0.25	7.0975	0.5	7.5675	0.75	8.071	0.8	8.213	0.875	8.4745	0.9	8.583	0.95	8.9035	111	7.5435	0.55198
40	0.05	6.5005	0.1	6.7105	0.125	6.7915	0.2	6.9855	0.25	7.0975	0.5	7.5675	0.75	8.071	0.8	8.213	0.875	8.4745	0.9	8.583	0.95	8.9035	111	7.5435	0.55198
41	0.05	6.5005	0.1	6.7105	0.125	6.7915	0.2	6.9855	0.25	7.0975	0.5	7.5675	0.75	8.071	0.8	8.213	0.875	8.4745	0.9	8.583	0.95	8.9035	111	7.5435	0.55198
42	0.05	6.5005	0.1	6.7105	0.125	6.7915	0.2	6.9855	0.25	7.0975	0.5	7.5675	0.75	8.071	0.8	8.213	0.875	8.4745	0.9	8.583	0.95	8.9035	111	7.5435	0.55198
43	0.05	6.5005	0.1	6.7105	0.125	6.7915	0.2	6.9855	0.25	7.0975	0.5	7.5675	0.75	8.071	0.8	8.213	0.875	8.4745	0.9	8.583	0.95	8.9035	111	7.5435	0.55198
44	0.05	6.5005	0.1	6.7105	0.125	6.7915	0.2	6.9855	0.25	7.0975	0.5	7.5675	0.75	8.071	0.8	8.213	0.875	8.4745	0.9	8.583	0.95	8.9035	111	7.5435	0.55198
45	0.05	6.5005	0.1	6.7105	0.125	6.7915	0.2	6.9855	0.25	7.0975	0.5	7.5675	0.75	8.071	0.8	8.213	0.875	8.4745	0.9	8.583	0.95	8.9035	111	7.5435	0.55198
46	0.05	6.5005	0.1	6.7105	0.125	6.7915	0.2	6.9855	0.25	7.0975	0.5	7.5675	0.75	8.071	0.8	8.213	0.875	8.4745	0.9	8.583	0.95	8.9035	111	7.5435	0.55198
47	0.05	6.5005	0.1	6.7105	0.125	6.7915	0.2	6.9855	0.25	7.0975	0.5	7.5675	0.75	8.071	0.8	8.213	0.875	8.4745	0.9	8.583	0.95	8.9035	111	7.5435	0.55198
48	0.05	6.5005	0.1	6.7105	0.125	6.7915	0.2	6.9855	0.25	7.0975	0.5	7.5675	0.75	8.071	0.8	8.213	0.875	8.4745	0.9	8.583	0.95	8.9035	111	7.5435	0.55198
49	0.05	6.5005	0.1	6.7105	0.125	6.7915	0.2	6.9855	0.25	7.0975	0.5	7.5675	0.75	8.071	0.8	8.213	0.875	8.4745	0.9	8.583	0.95	8.9035	111	7.5435	0.55198
50	0.05	6.5005	0.1	6.7105	0.125	6.7915	0.2	6.9855	0.25	7.0975	0.5	7.5675	0.75	8.071	0.8	8.213	0.875	8.4745	0.9	8.583	0.95	8.9035	111	7.5435	0.55198
51	0.05	6.5005	0.1	6.7105	0.125	6.7915	0.2	6.9855	0.25	7.0975	0.5	7.5675	0.75	8.071	0.8	8.213	0.875	8.4745	0.9	8.583	0.95	8.9035	111	7.5435	0.55198
52	0.05	6.5005	0.1	6.7105	0.125	6.7915	0.2	6.9855	0.25	7.0975	0.5	7.5675	0.75	8.071	0.8	8.213	0.875	8.4745	0.9	8.583	0.95	8.9035	111	7.5435	0.55198
53	0.05	6.5005	0.1	6.7105	0.125	6.7915	0.2	6.9855	0.25	7.0975	0.5	7.5675	0.75	8.071	0.8	8.213	0.875	8.4745	0.9	8.583	0.95	8.9035	111	7.5435	0.55198
54	0.05	6.5005	0.1	6.7105	0.125	6.7915	0.2	6.9855	0.25	7.0975	0.5	7.5675	0.75	8.071	0.8	8.213	0.875	8.4745	0.9	8.583	0.95	8.9035	111	7.5435	0.55198
55	0.05	6.5005	0.1	6.7105	0.125	6.7915	0.2	6.9855	0.25	7.0975	0.5	7.5675	0.75	8.071	0.8	8.213	0.875	8.4745	0.9	8.583	0.95	8.9035	111	7.5435	0.55198
56	0.05	6.5005	0.1	6.7105	0.125	6.7915	0.2	6.9855	0.25	7.0975	0.5	7.5675	0.75	8.071	0.8	8.213	0.875	8.4745	0.9	8.583	0.95	8.9035	111	7.5435	0.55198
57	0.05	6.5005	0.1	6.7105	0.125	6.7915	0.2	6.9855	0.25	7.0975	0.5	7.5675	0.75	8.071	0.8	8.213	0.875	8.4745	0.9	8.583	0.95	8.9035	111	7.5435	0.55198
58	0.05	6.5005	0.1	6.7105	0.125	6.7915	0.2	6.9855	0.25	7.0975	0.5	7.5675	0.75	8.071	0.8	8.213	0.875	8.4745	0.9	8.583	0.95	8.9035	111	7.5435	0.55198
59	0.05	6.5005	0.1	6.7105	0.125	6.7915	0.2	6.9855	0.25	7.0975	0.5	7.5675	0.75	8.071	0.8	8.213	0.875	8.4745	0.9	8.583	0.95	8.9035	111	7.5435	0.55198
60	0.05	6.5005	0.1	6.7105	0.125	6.7915	0.2	6.9855	0.25	7.0975	0.5	7.5675	0.75	8.071	0.8	8.213	0.875	8.4745	0.9	8.583	0.95	8.9035	111	7.5435	0.55198
61	0.05	6.5005	0.1	6.7105	0.125	6.7915	0.2	6.9855	0.25	7.0975	0.5	7.5675	0.75	8.071	0.8	8.213	0.875	8.4745	0.9	8.583	0.95	8.9035	111	7.5435	0.55198
62	0.05	6.5005	0.1	6.7105	0.125	6.7915	0.2	6.9855	0.25	7.0975	0.5	7.5675	0.75	8.071	0.8	8.213	0.875	8.4745	0.9	8.583	0.95	8.9035	111	7.5435	0.55198
63	0.05	6.5005	0.1	6.7105	0.125	6.7915	0.2	6.9855	0.25	7.0975	0.5	7.5675	0.75	8.071	0.8	8.213	0.875	8.4745	0.9	8.583	0.95	8.9035	111	7.5435	0.55198
64	0.05	6.5005	0.1	6.7105	0.125	6.7915	0.2	6.9855	0.25	7.0975	0.5	7.5675	0.75	8.071	0.8	8.213	0.875	8.4745	0.9	8.583	0.95	8.9035	111	7.5435	0.55198
65	0.05	6.5005	0.1	6.7105	0.125	6.7915	0.2	6.9855	0.25	7.0975	0.5	7.5675	0.75	8.071	0.8	8.213	0.875	8.4745	0.9	8.583	0.95	8.9035	111	7.5435	0.55198
66	0.05	6.5005	0.1	6.7105	0.125	6.7915	0.2	6.9855	0.25	7.0975	0.5	7.5675	0.75	8.071	0.8	8.213	0.875	8.4745	0.9	8.583	0.95	8.9035	111	7.5435	0.55198
67	0.05	6.5005	0.1	6.7105	0.125	6.7915	0.2	6.9855	0.25	7.0975	0.5	7.5675	0.75	8.071	0.8	8.213	0.875	8.4745	0.9	8.583	0.95	8.9035	111	7.5435	0.55198
68	0.05	6.5005	0.1	6.7105	0.125	6.7915	0.2	6.9855	0.25	7.0975	0.5	7.5675	0.75	8.071	0.8	8.213	0.875	8.4745	0.9	8.583	0.95	8.9035	111	7.5435	0.55198
69	0.05	6.5005	0.1	6.7105	0.125	6.7915	0.2	6.9855	0.25	7.0975	0.5	7.5675	0.75	8.071	0.8	8.213	0.875	8.4745	0.9	8.583	0.95	8.9035	111	7.5435	0.55198
70	0.05	6.5005	0.1	6.7105	0.125	6.7915	0.2	6.9855	0.25	7.0975	0.5	7.5675	0.75	8.071	0.8	8.213	0.875	8.4745	0.9	8.583	0.95	8.9035	111	7.5435	0.55198
71	0.05	6.5005	0.1	6.7105	0.125	6.7915	0.2	6.9855	0.25	7.0975	0.5	7.5675	0.75	8.071	0.8	8.213	0.875	8.4745	0.9	8.583	0.95	8.9035	111	7.5435	0.55198
72	0.05	6.5005	0.1	6.7105	0.125	6.7915	0.2	6.9855	0.25	7.0975	0.5	7.5675	0.75	8.071	0.8	8.213	0.875	8.4745	0.9	8.583	0.95	8.9035	111	7.5435	0.55198
73	0.05	6.5005	0.1	6.7105	0.125	6.7915	0.2	6.9855	0.25	7.0975	0.5	7.5675	0.75	8.071	0.8	8.213	0.875	8.4745	0.9	8.583	0.95	8.9035	111	7.5435	0.55198
74	0.05	6.5005	0.1	6.7105	0.125	6.7915	0.2	6.9855	0.25	7.0975	0.5	7.5675	0.75	8.071	0.8	8.213	0.875	8.4745	0.9	8.583	0.95	8.9035	111	7.5435	0.55198
75	0.05	6.5005	0.1	6.7105	0.125	6.7915	0.2	6.9855	0.25	7.0975	0.5	7.5675	0.75	8.071	0.8	8.213	0.875	8.4745	0.9	8.583	0.95	8.9035	111	7.5435	0.55198
76	0.05	6.5005	0.1	6.7105	0.125	6.7915	0.2	6.9855	0.25	7.0975	0.5	7.5675	0.75	8.071	0.8	8.213	0.875	8.4745	0.9	8.583	0.95	8.9035	111	7.5435	0.55198
77	0.05	6.5005	0.1	6.7105	0.125	6.7915	0.2	6.9855	0.25	7.0975	0.5	7.5675	0.75	8.071	0.8	8.213	0.875	8.4745	0.9	8.583	0.95	8.9035	111	7.5435	0.55198
78	0.05	6.5005	0.1	6.7105	0.125	6.7915	0.2	6.9855	0.25	7.0975	0.5	7.5675	0.75	8.071	0.8	8.213	0.875	8.4745	0.9	8.583	0.95	8.9035	111	7.5435	0.55198
79	0.05	6.5005	0.1	6.7105	0.125	6.7915	0.2	6.9855	0.25	7.0975	0.5	7.5675	0.75	8.071	0.8	8.213	0.875	8.4745	0.9	8.583	0.95	8.9035	111	7.5435	0.55198
80	0.05	6.5005	0.1	6.7105	0.125	6.7915	0.2	6.9855	0.25	7.0975	0.5	7.5675	0.75	8.071	0.8	8.213	0.875	8.4745	0.9	8.583	0.95	8.9035	111	7.5435	0.55198
81	0.05	6.5005	0.1	6.7105	0.125	6.7915	0.2	6.9855	0.25	7.0975	0.5	7.5675	0.75	8.071	0.8	8.213	0.875	8.4745	0.9	8.583	0.95	8.9035	111	7.5435	0.55198
82	0.05	6.5005	0.1	6.7105	0.125	6.7915	0.2	6.9855	0.25	7.0975	0.5	7.5675	0.75	8.071	0.8	8.213	0.875	8.4745	0.9	8.583	0.95	8.9035	111	7.5435	0.55198
83	0.05	6.5005	0.1	6.7105	0.125	6.7915	0.2	6.9855	0.25	7.0975	0.5	7.5675	0.75	8.071	0.8	8.213	0.875	8.4745	0.9	8.583	0.95	8.9035	111	7.5435	0.55198
84	0.05	6.5005	0.1	6.7105	0.125	6.7915	0.2	6.9855	0.25	7.0975	0.5	7.5675	0.75	8.071	0.8	8.213	0.875	8.4745	0.9	8.583	0.95	8.9035	111	7.5435	0.55198
85	0.05	6.5005	0.1	6.7105	0.125	6.7915	0.2	6.9855	0.25	7.0975	0.5	7.5675	0.75	8.071	0.8	8.213	0.875	8.4745	0.9	8.583	0.95	8.9035	111	7.5435	0.55198
86	0.05	6.5005	0.1	6.7105	0.125	6.7915	0.2	6.9855	0.25	7.0975	0.5	7.5675	0.75	8.071	0.8	8.213	0.875	8.4745	0.9	8.583	0.95	8.9035	111	7.5435	0.55198
87	0.05	6.5005	0.1	6.7105	0.125	6.7915	0.2	6.9855	0.25	7.0975	0.5	7.5675	0.75	8.071	0.8	8.213	0.875	8.4745	0.9	8.583	0.95	8.9035	111	7.5435	0.55198
88	0.05	6.5005	0.1	6.7105	0.125	6.7915	0.2	6.9855	0.25	7.0975	0.5	7.5675	0.75	8.071	0.8	8.213	0.875	8.4745	0.9	8.583	0.95	8.9035	111	7.5435	0.55198
89	0.05	6.5005	0.1	6.7105	0.125	6.7915	0.2	6.9855	0.25	7.0975	0.5	7.5675	0.75	8.071	0.8	8.213	0.875	8.4745	0.9	8.583	0.95	8.9035	111	7.5435	0.55198
90	0.05	6.5005	0.1	6.7105	0.125	6.7915	0.2	6.9855	0.25	7.0975	0.5	7.5675	0.75	8.071	0.8	8.213	0.875	8.4745	0.9	8.583	0.95	8.9035	111	7.5435	0.55198
91	0.05	6.5005	0.1	6.7105	0.125	6.7915	0.2	6.9855	0.25	7.0975	0.5	7.5675	0.75	8.071	0.8	8.213	0.875	8.4745	0.9	8.583	0.95	8.9035	111	7.5435	0.55198
92	0.05	6.5005	0.1	6.7105	0.125	6.7915	0.2	6.9855	0.25	7.0975	0.5	7.5675	0.75	8.071	0.8	8.213	0.875	8.4745	0.9	8.583	0.95	8.9035	111	7.5435	0.55198
93	0.05	6.5005	0.1	6.7105	0.125	6.7915	0.2	6.9855	0.25	7.0975	0.5	7.5675	0.75	8.071	0.8	8.213	0.875	8.4745	0.9	8.583	0.95	8.9035	111	7.5435	0.55198
94	0.05	6.5005	0.1	6.7105	0.125	6.7915	0.2	6.9855	0.25	7.0975	0.5	7.5675	0.75	8.071	0.8	8.213	0.875	8.4745	0.9	8.583	0.95	8.9035	111	7.5435	0.55198
95	0.05	6.5005	0.1	6.7105	0.125	6.7915	0.2	6.9855	0.25	7.0975	0.5	7.5675	0.75	8.071	0.8	8.213	0.875	8.4745	0.9	8.583	0.95	8.9035	111	7.5435	0.55198
96	0.05	6.5005	0.1	6.7105	0.125	6.7915	0.2	6.9855	0.25	7.0975	0.5	7.5675	0.75	8.071	0.8	8.213	0.875	8.4745	0.9	8.583	0.95	8.9035	111	7.5435	0.55198
97	0.05	6.5005	0.1	6.7105	0.125	6.7915	0.2	6.9855	0.25	7.0975	0.5	7.5675	0.75	8.071	0.8	8.213	0.875	8.4745	0.9	8.583	0.95	8.9035	111	7.5435	0.55198
98	0.05	6.5005	0.1	6.7105	0.125	6.7915	0.2	6.9855	0.25	7.0975	0.5	7.5675	0.75	8.071	0.8	8.213	0.875	8.4745	0.9	8.583	0.95	8.9035	111	7.5435	0.55198
99	0.05	6.5005	0.1	6.7105	0.125	6.7915	0.2	6.9855	0.25	7.0975	0.5	7.5675	0.75	8.071	0.8	8.213	0.875	8.4745	0.9	8.583	0.95	8.9035	111	7.5435	0.55198
100	0.05	6.5005	0.1	6.7105	0.125	6.7915	0.2	6.9855	0.25	7.0975	0.5	7.5675	0.75	8.071	0.8	8.213	0.875	8.4745	0.9	8.583	0.95	8.9035	111	7.5435	0.55198
101	0.05	6.5005	0.1	6.7105	0.125	6.7915	0.2	6.9855	0.25	7.0975	0.5	7.5675	0.75	8.071	0.8	8.213	0.875	8.4745	0.9	8.583	0.95	8.9035	111	7.5435	0.55198
102	0.05	6.5005	0.1	6.7105	0.125	6.7915	0.2	6.9855	0.25	7.0975	0.5	7.5675	0.75	8.071	0.8	8.213	0.875	8.4745	0.9	8.583	0.95	8.9035	111	7.5435	0.55198
103	0.05	6.5005	0.1	6.7105	0.125	6.7915	0.2	6.9855	0.25	7.0975	0.5	7.5675	0.75	8.071	0.8	8.213	0.875	8.4745	0.9	8.583	0.95	8.9035	111	7.5435	0.55198
104	0.05	6.5005	0.1	6.7105	0.125	6.7915	0.2	6.9855	0.25	7.0975	0.5	7.5675	0.75	8.071	0.8	8.213	0.875	8.4745	0.9	8.583	0.95	8.9035	111	7.5435	0.55198
105	0.05	6.5005	0.1	6.7105	0.125	6.7915	0.2	6.9855	0.25	7.0975	0.5	7.5675	0.75	8.071	0.8	8.213	0.875	8.4745	0.9	8.583	0.95	8.9035	111	7.5435	0.55198
106	0.05	6.5005	0.1	6.7105	0.125	6.7915	0.2	6.9855	0.25	7.0975	0.5	7.5675	0.75	8.071	0.8	8.213	0.875	8.4745	0.9	8.583	0.95	8.9035	111	7.5435	0.55198
107	0.05	6.5005	0.1	6.7105	0.125	6.7915	0.2	6.9855	0.25	7.0975	0.5	7.5675	0.75	8.071	0.8	8.213	0.875	8.4745	0.9	8.583	0.95	8.9035	111	7.5435	0.55198
108	0.05	6.5005	0.1	6.7105	0.125	6.7915	0.2	6.9855	0.25	7.0975	0.5	7.5675	0.75	8.071	0.8	8.213	0.875	8.4745	0.9	8.583	0.95	8.9035	111	7.5435	0.55198
109	0.05	6.5005	0.1	6.7105	0.125	6.7915	0.2	6.9855	0.25	7.0975	0.5	7.5675	0.75	8.071	0.8	8.213	0.875	8.4745	0.9	8.583	0.95	8.9035	111	7.5435	0.55198
110	0.05	6.5005	0.1	6.7105	0.125	6.7915	0.2	6.9855	0.25	7.0975	0.5	7.5675	0.75	8.071	0.8	8.213	0.875	8.4745	0.9	8.583	0.95	8.9035	111	7.5435	0.55198
111	0.05	6.5005	0.1	6.7105	0.125	6.7915	0.2	6.9855	0.25	7.0975	0.5	7.5675	0.75	8.071	0.8	8.213	0.875	8.4745	0.9	8.583	0.95	8.9035	111	7.5435	0.55198
112	0.05	6.5005	0.1	6.7105	0.125	6.7915	0.2	6.9855	0.25	7.0975	0.5	7.5675	0.75	8.071	0.8	8.213	0.875	8.4745	0.9	8.583	0.95	8.9035	111	7.5435	0.55198
113	0.05	6.5005	0.1	6.7105	0.125	6.7915	0.2	6.9855	0.25	7.0975	0.5	7.5675	0.75	8.071	0.8	8.213	0.875	8.4745	0.9	8.583	0.95	8.9035	111	7.5435	0.55198
114	0.05	6.5005	0.1	6.7105	0.125	6.7915	0.2	6.9855	0.25	7.0975	0.5	7.5675	0.75	8.071	0.8	8.213	0.875	8.4745	0.9	8.583	0.95	8.9035	111	7.5435	0.55198
115	0.05	6.5005	0.1	6.7105	0.125	6.7915	0.2	6.9855	0.25	7.0975	0.5	7.5675	0.75	8.071	0.8	8.213	0.875	8.4745	0.9	8.583	0.95	8.9035	111	7.5435	0.55198
116	0.05	6.5005	0.1	6.7105	0.125	6.7915	0.2	6.9855	0.25	7.0975	0.5	7.5675	0.75	8.071	0.8	8.213	0.875	8.4745	0.9	8.583	0.95	8.9035	111	7.5435	0.55198
117	0.05	6.5005	0.1	6.7105	0.125	6.7915	0.2	6.9855	0.25	7.0975	0.5	7.5675	0.75	8.071	0.8	8.213	0.875	8.4745	0.9	8.583	0.95	8.9035	111	7.5435	0.55198
118	0.05	6.5005	0.1	6.7105	0.125	6.7915	0.2	6.9855	0.25	7.0975	0.5	7.5675	0.75	8.071	0.8	8.213	0.875	8.4745	0.9	8.583	0.95	8.9035	111	7.5435	0.55198
119	0.05	6.5005	0.1	6.7105	0.125	6.7915	0.2	6.9855	0.25	7.0975	0.5	7.5675	0.75	8.071	0.8	8.213	0.875	8.4745	0.9	8.583	0.95	8.9035	111	7.5435	0.55198
120	0.05	6.5005	0.1	6.7105	0.125	6.7915	0.2	6.9855	0.25	7.0975	0.5	7.5675	0.75	8.071	0.8	8.213	0.875	8.4745	0.9	8.583	0.95	8.9035	111	7.5435	0.55198
121	0.05	6.5005	0.1	6.7105	0.125	6.7915	0.2	6.9855	0.25	7.0975	0.5	7.5675	0.75	8.071	0.8	8.213	0.875	8.4745	0.9	8.583	0.95	8.9035	111	7.5435	0.55198
122	0.05	6.5005	0.1	6.7105	0.125	6.7915	0.2	6.9855	0.25	7.0975	0.5	7.5675	0.75	8.071	0.8	8.213	0.875	8.4745	0.9	8.583	0.95	8.9035	111	7.5435	0.55198
123	0.05	6.5005	0.1	6.7105	0.125	6.7915	0.2	6.9855	0.25	7.0975	0.5	7.5675	0.75	8.071	0.8	8.213	0.875	8.4745	0.9	8.583	0.95	8.9035	111	7.5435	0.55198
124	0.05	6.5005	0.1	6.7105	0.125	6.7915	0.2	6.9855	0.25	7.0975	0.5	7.5675	0.75	8.071	0.8	8.213	0.875	8.4745	0.9	8.583	0.95	8.9035	111	7.5435	0.55198
125	0.05	6.5005	0.1	6.7105	0.125	6.7915	0.2	6.9855	0.25	7.0975	0.5	7.5675	0.75	8.071	0.8	8.213	0.875	8.4745	0.9	8.583	0.95	8.9035	111	7.5435	0.55198
126	0.05	6.5005	0.1	6.7105	0.125	6.7915	0.2	6.9855	0.25	7.0975	0.5	7.5675	0.75	8.071	0.8	8.213	0.875	8.4745	0.9	8.583	0.95	8.9035	111	7.5435	0.55198
127	0.05	6.5005	0.1	6.7105	0.125	6.7915	0.2	6.9855	0.25	7.0975	0.5	7.5675	0.75	8.071	0.8	8.213	0.875	8.4745	0.9	8.583	0.95	8.9035	111	7.5435	0.55198
128	0.05	6.5005	0.1	6.7105	0.125	6.7915	0.2	6.9855	0.25	7.0975	0.5	7.5675	0.75	8.071	0.8	8.213	0.875	8.4745	0.9	8.583	0.95	8.9035	111	7.5435	0.55198
129	0.05	6.5005	0.1	6.7105	0.125	6.7915	0.2	6.9855	0.25	7.0975	0.5	7.5675	0.75	8.071	0.8	8.213	0.875	8.4745	0.9	8.583	0.95	8.9035	111	7.5435	0.55198
130	0.05	6.5005	0.1	6.7105	0.125	6.7915	0.2	6.9855	0.25	7.0975	0.5	7.5675	0.75	8.071	0.8	8.213	0.875	8.4745	0.9	8.583	0.95	8.9035	111	7.5435	0.55198
131	0.05	6.5005	0.1	6.7105	0.125	6.7915	0.2	6.9855	0.25	7.0975	0.5	7.5675	0.75	8.071	0.8	8.213	0.875	8.4745	0.9	8.583	0.95	8.9035	111	7.5435	0.55198
132	0.05	6.5005	0.1	6.7105	0.125	6.7915	0.2	6.9855	0.25	7.0975	0.5	7.5675	0.75	8.071	0.8	8.213	0.875	8.4745	0.9	8.583	0.95	8.9035	111	7.5435	0.55198
133	0.05	6.5005	0.1	6.7105	0.125	6.7915	0.2	6.9855	0.25	7.0975	0.5	7.5675	0.75	8.071	0.8	8.213	0.875	8.4745	0.9	8.583	0.95	8.9035	111	7.5435	0.55198
134	0.05	6.5005	0.1	6.7105	0.125	6.7915	0.2	6.9855	0.25	7.0975	0.5	7.5675	0.75	8.071	0.8	8.213	0.875	8.4745	0.9	8.583	0.95	8.9035	111	7.5435	0.55198
135	0.05	6.5005	0.1	6.7105	0.125	6.7915	0.2	6.9855	0.25	7.0975	0.5	7.5675	0.75	8.071	0.8	8.213	0.875	8.4745	0.9	8.583	0.95	8.9035	111	7.5435	0.55198
136	0.05	6.5005	0.1	6.7105	0.125	6.7915	0.2	6.9855	0.25	7.0975	0.5	7.5675	0.75	8.071	0.8	8.213	0.875	8.4745	0.9	8.583	0.95	8.9035	111	7.5435	0.55198
137	0.05	6.5005	0.1	6.7105	0.125	6.7915	0.2	6.9855	0.25	7.0975	0.5	7.5675	0.75	8.071	0.8	8.213	0.875	8.4745	0.9	8.583	0.95	8.9035	111	7.5435	0.55198
138	0.05	6.5005	0.1	6.7105	0.125	6.7915	0.2	6.9855	0.25	7.0975	0.5	7.5675	0.75	8.071	0.8	8.213	0.875	8.4745	0.9	8.583	0.95	8.9035	111	7.5435	0.55198
139	0.05	6.5005	0.1	6.7105	0.125	6.7915	0.2	6.9855	0.25	7.0975	0.5	7.5675	0.75	8.071	0.8	8.213	0.875	8.4745	0.9	8.583	0.95	8.9035	111	7.5435	0.55198
140	0.05	6.5005	0.1	6.7105	0.125	6.7915	0.2	6.9855	0.25	7.0975	0.5	7.5675	0.75	8.071	0.8	8.213	0.875	8.4745	0.9	8.583	0.95	8.9035	111	7.5435	0.55198
141	0.05	6.5005	0.1	6.7105	0.125	6.7915	0.2	6.9855	0.25	7.0975	0.5	7.5675	0.75	8.071	0.8	8.213	0.875	8.4745	0.9	8.583	0.95	8.9035	111	7.5435	0.55198
142	0.05	6.5005	0.1	6.7105	0.125	6.7915	0.2	6.9855	0.25	7.0975	0.5	7.5675	0.75	8.071	0.8	8.213	0.875	8.4745	0.9	8.583	0.95	8.9035	111	7.5435	0.55198
143	0.05	6.5005	0.1	6.7105	0.125	6.7915	0.2	6.9855	0.25	7.0975	0.5	7.5675	0.75	8.071	0.8	8.213	0.875	8.4745	0.9	8.583	0.95	8.9035	111	7.5435	0.55198
144	0.05	6.5005	0.1	6.7105	0.125	6.7915	0.2	6.9855	0.25	7.0975	0.5	7.5675	0.75	8.071	0.8	8.213	0.875	8.4745	0.9	8.583	0.95	8.9035	111	7.5435	0.55198
145	0.05	6.5005	0.1	6.7105	0.125	6.7915	0.2	6.9855	0.25	7.0975	0.5	7.5675	0.75	8.071	0.8	8.213	0.875	8.4745	0.9	8.583	0.95	8.9035	111	7.5435	0.55198
146	0.05	6.5005	0.1	6.7105	0.125	6.7915	0.2	6.9855	0.25	7.0975	0.5	7.5675	0.75	8.071	0.8	8.213	0.875	8.4745	0.9	8.583	0.95	8.9035	111	7.5435	0.55198
147	0.05	6.5005	0.1	6.7105	0.125	6.7915	0.2	6.9855	0.25	7.0975	0.5	7.5675	0.75	8.071	0.8	8.213	0.875	8.4745	0.9	8.583	0.95	8.9035	111	7.5435	0.55198
148	0.05	6.5005	0.1	6.7105	0.125	6.7915	0.2	6.9855	0.25	7.0975	0.5	7.5675	0.75	8.071	0.8	8.213	0.875	8.4745	0.9	8.583	0.95	8.9035	111	7.5435	0.55198
149	0.05	6.5005	0.1	6.7105	0.125	6.7915	0.2	6.9855	0.25	7.0975	0.5	7.5675	0.75	8.071	0.8	8.213	0.875	8.4745	0.9	8.583	0.95	8.9035	111	7.5435	0.55198
150	0.05	6.5005	0.1	6.7105	0.125	6.7915	0.2	6.9855	0.25	7.0975	0.5	7.5675	0.75	8.071	0.8	8.213	0.875	8.4745	0.9	8.583	0.95	8.9035	111	7.5435	0.55198
151	0.05	6.5005	0.1	6.7105	0.125	6.7915	0.2	6.9855	0.25	7.0975	0.5	7.5675	0.75	8.071	0.8	8.213	0.875	8.4745	0.9	8.583	0.95	8.9035	111	7.5435	0.55198
152	0.05	6.5005	0.1	6.7105	0.125	6.7915	0.2	6.9855	0.25	7.0975	0.5	7.5675	0.75	8.071	0.8	8.213	0.875	8.4745	0.9	8.583	0.95	8.9035	111	7.5435	0.55198
153	0.05	6.5005	0.1	6.7105	0.125	6.7915	0.2	6.9855	0.25	7.0975	0.5	7.5675	0.75	8.071	0.8	8.213	0.875	8.4745	0.9	8.583	0.95	8.9035	111	7.5435	0.55198
154	0.05	6.5005	0.1	6.7105	0.125	6.7915	0.2	6.9855	0.25	7.0975	0.5	7.5675	0.75	8.071	0.8	8.213	0.875	8.4745	0.9	8.583	0.95	8.9035	111	7.5435	0.55198
155	0.05	6.5005	0.1	6.7105	0.125	6.7915	0.2	6.9855	0.25	7.0975	0.5	7.5675	0.75	8.071	0.8	8.213	0.875	8.4745	0.9	8.583	0.95	8.9035	111	7.5435	0.55198
156	0.05	6.5005	0.1	6.7105	0.125	6.7915	0.2	6.9855	0.25	7.0975	0.5	7.5675	0.75	8.071	0.8	8.213	0.875	8.4745	0.9	8.583	0.95	8.9035	111	7.5435	0.55198
157	0.05	6.5005	0.1	6.7105	0.125	6.7915	0.2	6.9855	0.25	7.0975	0.5	7.5675	0.75	8.071	0.8	8.213	0.875	8.4745	0.9	8.583	0.95	8.9035	111	7.5435	0.55198
158	0.05	6.5005	0.1	6.7105	0.125	6.7915	0.2	6.9855	0.25	7.0975	0.5	7.5675	0.75	8.071	0.8	8.213	0.875	8.4745	0.9	8.583	0.95	8.9035	111	7.5435	0.55198
