# Supplementary material for: Time-varying asymmetry and tail thickness in long series of daily financial returns
Source: publisher site journal article supplement (doi:10.1515/snde-2017-0071), 2018-10-02
Supplement: Supplementary file 65 [file thres_ucd.xlsx]

## Sheet: 1
	Var1	Var2	Var3	Var4	Var5	Var6	Var7	Var8	Var9	Var10	Var11	Var12	Var13	Var14	Var15	Var16	Var17	Var18	Var19	Var20	Var21	Var22	Var23	Var24	Var25
1	0	0	0	0	0	0	0	0	0	0	0	0	0	0	0	0	0	0	0	0	0	0	0	0	0
2	0.05	0.7748	0.1	0.7975	0.125	0.8068	0.2	0.8288	0.25	0.842	0.5	0.9045	0.75	0.9873	0.8	1.0132	0.875	1.0685	0.9	1.0959	0.95	1.1895	111	0.8633	4.12248
3	0.05	0.7748	0.1	0.7975	0.125	0.8068	0.2	0.8288	0.25	0.842	0.5	0.9045	0.75	0.9873	0.8	1.0132	0.875	1.0685	0.9	1.0959	0.95	1.1895	111	0.8633	4.12248
4	0.05	0.7748	0.1	0.7975	0.125	0.8068	0.2	0.8288	0.25	0.842	0.5	0.9045	0.75	0.9873	0.8	1.0132	0.875	1.0685	0.9	1.0959	0.95	1.1895	111	0.8633	4.12248
5	0.05	0.7748	0.1	0.7975	0.125	0.8068	0.2	0.8288	0.25	0.842	0.5	0.9045	0.75	0.9873	0.8	1.0132	0.875	1.0685	0.9	1.0959	0.95	1.1895	111	0.8633	4.12248
6	0.05	0.7748	0.1	0.7975	0.125	0.8068	0.2	0.8288	0.25	0.842	0.5	0.9045	0.75	0.9873	0.8	1.0132	0.875	1.0685	0.9	1.0959	0.95	1.1895	111	0.8633	4.12248
7	0.05	0.7748	0.1	0.7975	0.125	0.8068	0.2	0.8288	0.25	0.842	0.5	0.9045	0.75	0.9873	0.8	1.0132	0.875	1.0685	0.9	1.0959	0.95	1.1895	111	0.8633	4.12248
8	0.05	0.7748	0.1	0.7975	0.125	0.8068	0.2	0.8288	0.25	0.842	0.5	0.9045	0.75	0.9873	0.8	1.0132	0.875	1.0685	0.9	1.0959	0.95	1.1895	111	0.8633	4.12248
9	0.05	0.7748	0.1	0.7975	0.125	0.8068	0.2	0.8288	0.25	0.842	0.5	0.9045	0.75	0.9873	0.8	1.0132	0.875	1.0685	0.9	1.0959	0.95	1.1895	111	0.8633	4.12248
10	0.05	0.7748	0.1	0.7975	0.125	0.8068	0.2	0.8288	0.25	0.842	0.5	0.9045	0.75	0.9873	0.8	1.0132	0.875	1.0685	0.9	1.0959	0.95	1.1895	111	0.8633	4.12248
11	0.05	0.7748	0.1	0.7975	0.125	0.8068	0.2	0.8288	0.25	0.842	0.5	0.9045	0.75	0.9873	0.8	1.0132	0.875	1.0685	0.9	1.0959	0.95	1.1895	111	0.8633	4.12248
12	0.05	0.7748	0.1	0.7975	0.125	0.8068	0.2	0.8288	0.25	0.842	0.5	0.9045	0.75	0.9873	0.8	1.0132	0.875	1.0685	0.9	1.0959	0.95	1.1895	111	0.8633	4.12248
13	0.05	0.7748	0.1	0.7975	0.125	0.8068	0.2	0.8288	0.25	0.842	0.5	0.9045	0.75	0.9873	0.8	1.0132	0.875	1.0685	0.9	1.0959	0.95	1.1895	111	0.8633	4.12248
14	0.05	0.7748	0.1	0.7975	0.125	0.8068	0.2	0.8288	0.25	0.842	0.5	0.9045	0.75	0.9873	0.8	1.0132	0.875	1.0685	0.9	1.0959	0.95	1.1895	111	0.8633	4.12248
15	0.05	0.7748	0.1	0.7975	0.125	0.8068	0.2	0.8288	0.25	0.842	0.5	0.9045	0.75	0.9873	0.8	1.0132	0.875	1.0685	0.9	1.0959	0.95	1.1895	111	0.8633	4.12248
16	0.05	0.7748	0.1	0.7975	0.125	0.8068	0.2	0.8288	0.25	0.842	0.5	0.9045	0.75	0.9873	0.8	1.0132	0.875	1.0685	0.9	1.0959	0.95	1.1895	111	0.8633	4.12248
17	0.05	0.7748	0.1	0.7975	0.125	0.8068	0.2	0.8288	0.25	0.842	0.5	0.9045	0.75	0.9873	0.8	1.0132	0.875	1.0685	0.9	1.0959	0.95	1.1895	111	0.8633	4.12248
18	0.05	0.7748	0.1	0.7975	0.125	0.8068	0.2	0.8288	0.25	0.842	0.5	0.9045	0.75	0.9873	0.8	1.0132	0.875	1.0685	0.9	1.0959	0.95	1.1895	111	0.8633	4.12248
19	0.05	0.7748	0.1	0.7975	0.125	0.8068	0.2	0.8288	0.25	0.842	0.5	0.9045	0.75	0.9873	0.8	1.0132	0.875	1.0685	0.9	1.0959	0.95	1.1895	111	0.8633	4.12248
20	0.05	0.7748	0.1	0.7975	0.125	0.8068	0.2	0.8288	0.25	0.842	0.5	0.9045	0.75	0.9873	0.8	1.0132	0.875	1.0685	0.9	1.0959	0.95	1.1895	111	0.8633	4.12248
21	0.05	0.7748	0.1	0.7975	0.125	0.8068	0.2	0.8288	0.25	0.842	0.5	0.9045	0.75	0.9873	0.8	1.0132	0.875	1.0685	0.9	1.0959	0.95	1.1895	111	0.8633	4.12248
22	0.05	0.7748	0.1	0.7975	0.125	0.8068	0.2	0.8288	0.25	0.842	0.5	0.9045	0.75	0.9873	0.8	1.0132	0.875	1.0685	0.9	1.0959	0.95	1.1895	111	0.8633	4.12248
23	0.05	0.7748	0.1	0.7975	0.125	0.8068	0.2	0.8288	0.25	0.842	0.5	0.9045	0.75	0.9873	0.8	1.0132	0.875	1.0685	0.9	1.0959	0.95	1.1895	111	0.8633	4.12248
24	0.05	0.7748	0.1	0.7975	0.125	0.8068	0.2	0.8288	0.25	0.842	0.5	0.9045	0.75	0.9873	0.8	1.0132	0.875	1.0685	0.9	1.0959	0.95	1.1895	111	0.8633	4.12248
25	0.05	0.7748	0.1	0.7975	0.125	0.8068	0.2	0.8288	0.25	0.842	0.5	0.9045	0.75	0.9873	0.8	1.0132	0.875	1.0685	0.9	1.0959	0.95	1.1895	111	0.8633	4.12248
26	0.05	0.7748	0.1	0.7975	0.125	0.8068	0.2	0.8288	0.25	0.842	0.5	0.9045	0.75	0.9873	0.8	1.0132	0.875	1.0685	0.9	1.0959	0.95	1.1895	111	0.8633	4.12248
27	0.05	0.7748	0.1	0.7975	0.125	0.8068	0.2	0.8288	0.25	0.842	0.5	0.9045	0.75	0.9873	0.8	1.0132	0.875	1.0685	0.9	1.0959	0.95	1.1895	111	0.8633	4.12248
28	0.05	0.7748	0.1	0.7975	0.125	0.8068	0.2	0.8288	0.25	0.842	0.5	0.9045	0.75	0.9873	0.8	1.0132	0.875	1.0685	0.9	1.0959	0.95	1.1895	111	0.8633	4.12248
29	0.05	0.7748	0.1	0.7975	0.125	0.8068	0.2	0.8288	0.25	0.842	0.5	0.9045	0.75	0.9873	0.8	1.0132	0.875	1.0685	0.9	1.0959	0.95	1.1895	111	0.8633	4.12248
30	0.05	0.7748	0.1	0.7975	0.125	0.8068	0.2	0.8288	0.25	0.842	0.5	0.9045	0.75	0.9873	0.8	1.0132	0.875	1.0685	0.9	1.0959	0.95	1.1895	111	0.8633	4.12248
31	0.05	0.7748	0.1	0.7975	0.125	0.8068	0.2	0.8288	0.25	0.842	0.5	0.9045	0.75	0.9873	0.8	1.0132	0.875	1.0685	0.9	1.0959	0.95	1.1895	111	0.8633	4.12248
32	0.05	0.7748	0.1	0.7975	0.125	0.8068	0.2	0.8288	0.25	0.842	0.5	0.9045	0.75	0.9873	0.8	1.0132	0.875	1.0685	0.9	1.0959	0.95	1.1895	111	0.8633	4.12248
33	0.05	0.7748	0.1	0.7975	0.125	0.8068	0.2	0.8288	0.25	0.842	0.5	0.9045	0.75	0.9873	0.8	1.0132	0.875	1.0685	0.9	1.0959	0.95	1.1895	111	0.8633	4.12248
34	0.05	0.7748	0.1	0.7975	0.125	0.8068	0.2	0.8288	0.25	0.842	0.5	0.9045	0.75	0.9873	0.8	1.0132	0.875	1.0685	0.9	1.0959	0.95	1.1895	111	0.8633	4.12248
35	0.05	0.7748	0.1	0.7975	0.125	0.8068	0.2	0.8288	0.25	0.842	0.5	0.9045	0.75	0.9873	0.8	1.0132	0.875	1.0685	0.9	1.0959	0.95	1.1895	111	0.8633	4.12248
36	0.05	0.7748	0.1	0.7975	0.125	0.8068	0.2	0.8288	0.25	0.842	0.5	0.9045	0.75	0.9873	0.8	1.0132	0.875	1.0685	0.9	1.0959	0.95	1.1895	111	0.8633	4.12248
37	0.05	0.7748	0.1	0.7975	0.125	0.8068	0.2	0.8288	0.25	0.842	0.5	0.9045	0.75	0.9873	0.8	1.0132	0.875	1.0685	0.9	1.0959	0.95	1.1895	111	0.8633	4.12248
38	0.05	0.7748	0.1	0.7975	0.125	0.8068	0.2	0.8288	0.25	0.842	0.5	0.9045	0.75	0.9873	0.8	1.0132	0.875	1.0685	0.9	1.0959	0.95	1.1895	111	0.8633	4.12248
39	0.05	0.7748	0.1	0.7975	0.125	0.8068	0.2	0.8288	0.25	0.842	0.5	0.9045	0.75	0.9873	0.8	1.0132	0.875	1.0685	0.9	1.0959	0.95	1.1895	111	0.8633	4.12248
40	0.05	0.7748	0.1	0.7975	0.125	0.8068	0.2	0.8288	0.25	0.842	0.5	0.9045	0.75	0.9873	0.8	1.0132	0.875	1.0685	0.9	1.0959	0.95	1.1895	111	0.8633	4.12248
41	0.05	0.7748	0.1	0.7975	0.125	0.8068	0.2	0.8288	0.25	0.842	0.5	0.9045	0.75	0.9873	0.8	1.0132	0.875	1.0685	0.9	1.0959	0.95	1.1895	111	0.8633	4.12248
42	0.05	0.7748	0.1	0.7975	0.125	0.8068	0.2	0.8288	0.25	0.842	0.5	0.9045	0.75	0.9873	0.8	1.0132	0.875	1.0685	0.9	1.0959	0.95	1.1895	111	0.8633	4.12248
43	0.05	0.7748	0.1	0.7975	0.125	0.8068	0.2	0.8288	0.25	0.842	0.5	0.9045	0.75	0.9873	0.8	1.0132	0.875	1.0685	0.9	1.0959	0.95	1.1895	111	0.8633	4.12248
44	0.05	0.7748	0.1	0.7975	0.125	0.8068	0.2	0.8288	0.25	0.842	0.5	0.9045	0.75	0.9873	0.8	1.0132	0.875	1.0685	0.9	1.0959	0.95	1.1895	111	0.8633	4.12248
45	0.05	0.7748	0.1	0.7975	0.125	0.8068	0.2	0.8288	0.25	0.842	0.5	0.9045	0.75	0.9873	0.8	1.0132	0.875	1.0685	0.9	1.0959	0.95	1.1895	111	0.8633	4.12248
46	0.05	0.7748	0.1	0.7975	0.125	0.8068	0.2	0.8288	0.25	0.842	0.5	0.9045	0.75	0.9873	0.8	1.0132	0.875	1.0685	0.9	1.0959	0.95	1.1895	111	0.8633	4.12248
47	0.05	0.7748	0.1	0.7975	0.125	0.8068	0.2	0.8288	0.25	0.842	0.5	0.9045	0.75	0.9873	0.8	1.0132	0.875	1.0685	0.9	1.0959	0.95	1.1895	111	0.8633	4.12248
48	0.05	0.7748	0.1	0.7975	0.125	0.8068	0.2	0.8288	0.25	0.842	0.5	0.9045	0.75	0.9873	0.8	1.0132	0.875	1.0685	0.9	1.0959	0.95	1.1895	111	0.8633	4.12248
49	0.05	0.7748	0.1	0.7975	0.125	0.8068	0.2	0.8288	0.25	0.842	0.5	0.9045	0.75	0.9873	0.8	1.0132	0.875	1.0685	0.9	1.0959	0.95	1.1895	111	0.8633	4.12248
50	0.05	0.7748	0.1	0.7975	0.125	0.8068	0.2	0.8288	0.25	0.842	0.5	0.9045	0.75	0.9873	0.8	1.0132	0.875	1.0685	0.9	1.0959	0.95	1.1895	111	0.8633	4.12248
51	0.05	0.7748	0.1	0.7975	0.125	0.8068	0.2	0.8288	0.25	0.842	0.5	0.9045	0.75	0.9873	0.8	1.0132	0.875	1.0685	0.9	1.0959	0.95	1.1895	111	0.8633	4.12248
52	0.05	0.7748	0.1	0.7975	0.125	0.8068	0.2	0.8288	0.25	0.842	0.5	0.9045	0.75	0.9873	0.8	1.0132	0.875	1.0685	0.9	1.0959	0.95	1.1895	111	0.8633	4.12248
53	0.05	0.7748	0.1	0.7975	0.125	0.8068	0.2	0.8288	0.25	0.842	0.5	0.9045	0.75	0.9873	0.8	1.0132	0.875	1.0685	0.9	1.0959	0.95	1.1895	111	0.8633	4.12248
54	0.05	0.7748	0.1	0.7975	0.125	0.8068	0.2	0.8288	0.25	0.842	0.5	0.9045	0.75	0.9873	0.8	1.0132	0.875	1.0685	0.9	1.0959	0.95	1.1895	111	0.8633	4.12248
55	0.05	0.7748	0.1	0.7975	0.125	0.8068	0.2	0.8288	0.25	0.842	0.5	0.9045	0.75	0.9873	0.8	1.0132	0.875	1.0685	0.9	1.0959	0.95	1.1895	111	0.8633	4.12248
56	0.05	0.7748	0.1	0.7975	0.125	0.8068	0.2	0.8288	0.25	0.842	0.5	0.9045	0.75	0.9873	0.8	1.0132	0.875	1.0685	0.9	1.0959	0.95	1.1895	111	0.8633	4.12248
57	0.05	0.7748	0.1	0.7975	0.125	0.8068	0.2	0.8288	0.25	0.842	0.5	0.9045	0.75	0.9873	0.8	1.0132	0.875	1.0685	0.9	1.0959	0.95	1.1895	111	0.8633	4.12248
58	0.05	0.7748	0.1	0.7975	0.125	0.8068	0.2	0.8288	0.25	0.842	0.5	0.9045	0.75	0.9873	0.8	1.0132	0.875	1.0685	0.9	1.0959	0.95	1.1895	111	0.8633	4.12248
59	0.05	0.7748	0.1	0.7975	0.125	0.8068	0.2	0.8288	0.25	0.842	0.5	0.9045	0.75	0.9873	0.8	1.0132	0.875	1.0685	0.9	1.0959	0.95	1.1895	111	0.8633	4.12248
60	0.05	0.7748	0.1	0.7975	0.125	0.8068	0.2	0.8288	0.25	0.842	0.5	0.9045	0.75	0.9873	0.8	1.0132	0.875	1.0685	0.9	1.0959	0.95	1.1895	111	0.8633	4.12248
61	0.05	0.7748	0.1	0.7975	0.125	0.8068	0.2	0.8288	0.25	0.842	0.5	0.9045	0.75	0.9873	0.8	1.0132	0.875	1.0685	0.9	1.0959	0.95	1.1895	111	0.8633	4.12248
62	0.05	0.7748	0.1	0.7975	0.125	0.8068	0.2	0.8288	0.25	0.842	0.5	0.9045	0.75	0.9873	0.8	1.0132	0.875	1.0685	0.9	1.0959	0.95	1.1895	111	0.8633	4.12248
63	0.05	0.7748	0.1	0.7975	0.125	0.8068	0.2	0.8288	0.25	0.842	0.5	0.9045	0.75	0.9873	0.8	1.0132	0.875	1.0685	0.9	1.0959	0.95	1.1895	111	0.8633	4.12248
64	0.05	0.7748	0.1	0.7975	0.125	0.8068	0.2	0.8288	0.25	0.842	0.5	0.9045	0.75	0.9873	0.8	1.0132	0.875	1.0685	0.9	1.0959	0.95	1.1895	111	0.8633	4.12248
65	0.05	0.7748	0.1	0.7975	0.125	0.8068	0.2	0.8288	0.25	0.842	0.5	0.9045	0.75	0.9873	0.8	1.0132	0.875	1.0685	0.9	1.0959	0.95	1.1895	111	0.8633	4.12248
66	0.05	0.7748	0.1	0.7975	0.125	0.8068	0.2	0.8288	0.25	0.842	0.5	0.9045	0.75	0.9873	0.8	1.0132	0.875	1.0685	0.9	1.0959	0.95	1.1895	111	0.8633	4.12248
67	0.05	0.7748	0.1	0.7975	0.125	0.8068	0.2	0.8288	0.25	0.842	0.5	0.9045	0.75	0.9873	0.8	1.0132	0.875	1.0685	0.9	1.0959	0.95	1.1895	111	0.8633	4.12248
68	0.05	0.7748	0.1	0.7975	0.125	0.8068	0.2	0.8288	0.25	0.842	0.5	0.9045	0.75	0.9873	0.8	1.0132	0.875	1.0685	0.9	1.0959	0.95	1.1895	111	0.8633	4.12248
69	0.05	0.7748	0.1	0.7975	0.125	0.8068	0.2	0.8288	0.25	0.842	0.5	0.9045	0.75	0.9873	0.8	1.0132	0.875	1.0685	0.9	1.0959	0.95	1.1895	111	0.8633	4.12248
70	0.05	0.7748	0.1	0.7975	0.125	0.8068	0.2	0.8288	0.25	0.842	0.5	0.9045	0.75	0.9873	0.8	1.0132	0.875	1.0685	0.9	1.0959	0.95	1.1895	111	0.8633	4.12248
71	0.05	0.7748	0.1	0.7975	0.125	0.8068	0.2	0.8288	0.25	0.842	0.5	0.9045	0.75	0.9873	0.8	1.0132	0.875	1.0685	0.9	1.0959	0.95	1.1895	111	0.8633	4.12248
72	0.05	0.7748	0.1	0.7975	0.125	0.8068	0.2	0.8288	0.25	0.842	0.5	0.9045	0.75	0.9873	0.8	1.0132	0.875	1.0685	0.9	1.0959	0.95	1.1895	111	0.8633	4.12248
73	0.05	0.7748	0.1	0.7975	0.125	0.8068	0.2	0.8288	0.25	0.842	0.5	0.9045	0.75	0.9873	0.8	1.0132	0.875	1.0685	0.9	1.0959	0.95	1.1895	111	0.8633	4.12248
74	0.05	0.7748	0.1	0.7975	0.125	0.8068	0.2	0.8288	0.25	0.842	0.5	0.9045	0.75	0.9873	0.8	1.0132	0.875	1.0685	0.9	1.0959	0.95	1.1895	111	0.8633	4.12248
75	0.05	0.7748	0.1	0.7975	0.125	0.8068	0.2	0.8288	0.25	0.842	0.5	0.9045	0.75	0.9873	0.8	1.0132	0.875	1.0685	0.9	1.0959	0.95	1.1895	111	0.8633	4.12248
76	0.05	0.7748	0.1	0.7975	0.125	0.8068	0.2	0.8288	0.25	0.842	0.5	0.9045	0.75	0.9873	0.8	1.0132	0.875	1.0685	0.9	1.0959	0.95	1.1895	111	0.8633	4.12248
77	0.05	0.7748	0.1	0.7975	0.125	0.8068	0.2	0.8288	0.25	0.842	0.5	0.9045	0.75	0.9873	0.8	1.0132	0.875	1.0685	0.9	1.0959	0.95	1.1895	111	0.8633	4.12248
78	0.05	0.7748	0.1	0.7975	0.125	0.8068	0.2	0.8288	0.25	0.842	0.5	0.9045	0.75	0.9873	0.8	1.0132	0.875	1.0685	0.9	1.0959	0.95	1.1895	111	0.8633	4.12248
79	0.05	0.7748	0.1	0.7975	0.125	0.8068	0.2	0.8288	0.25	0.842	0.5	0.9045	0.75	0.9873	0.8	1.0132	0.875	1.0685	0.9	1.0959	0.95	1.1895	111	0.8633	4.12248
80	0.05	0.7748	0.1	0.7975	0.125	0.8068	0.2	0.8288	0.25	0.842	0.5	0.9045	0.75	0.9873	0.8	1.0132	0.875	1.0685	0.9	1.0959	0.95	1.1895	111	0.8633	4.12248
81	0.05	0.7748	0.1	0.7975	0.125	0.8068	0.2	0.8288	0.25	0.842	0.5	0.9045	0.75	0.9873	0.8	1.0132	0.875	1.0685	0.9	1.0959	0.95	1.1895	111	0.8633	4.12248
82	0.05	0.7748	0.1	0.7975	0.125	0.8068	0.2	0.8288	0.25	0.842	0.5	0.9045	0.75	0.9873	0.8	1.0132	0.875	1.0685	0.9	1.0959	0.95	1.1895	111	0.8633	4.12248
83	0.05	0.7748	0.1	0.7975	0.125	0.8068	0.2	0.8288	0.25	0.842	0.5	0.9045	0.75	0.9873	0.8	1.0132	0.875	1.0685	0.9	1.0959	0.95	1.1895	111	0.8633	4.12248
84	0.05	0.7748	0.1	0.7975	0.125	0.8068	0.2	0.8288	0.25	0.842	0.5	0.9045	0.75	0.9873	0.8	1.0132	0.875	1.0685	0.9	1.0959	0.95	1.1895	111	0.8633	4.12248
85	0.05	0.7748	0.1	0.7975	0.125	0.8068	0.2	0.8288	0.25	0.842	0.5	0.9045	0.75	0.9873	0.8	1.0132	0.875	1.0685	0.9	1.0959	0.95	1.1895	111	0.8633	4.12248
86	0.05	0.7748	0.1	0.7975	0.125	0.8068	0.2	0.8288	0.25	0.842	0.5	0.9045	0.75	0.9873	0.8	1.0132	0.875	1.0685	0.9	1.0959	0.95	1.1895	111	0.8633	4.12248
87	0.05	0.7748	0.1	0.7975	0.125	0.8068	0.2	0.8288	0.25	0.842	0.5	0.9045	0.75	0.9873	0.8	1.0132	0.875	1.0685	0.9	1.0959	0.95	1.1895	111	0.8633	4.12248
88	0.05	0.7748	0.1	0.7975	0.125	0.8068	0.2	0.8288	0.25	0.842	0.5	0.9045	0.75	0.9873	0.8	1.0132	0.875	1.0685	0.9	1.0959	0.95	1.1895	111	0.8633	4.12248
89	0.05	0.7748	0.1	0.7975	0.125	0.8068	0.2	0.8288	0.25	0.842	0.5	0.9045	0.75	0.9873	0.8	1.0132	0.875	1.0685	0.9	1.0959	0.95	1.1895	111	0.8633	4.12248
90	0.05	0.7748	0.1	0.7975	0.125	0.8068	0.2	0.8288	0.25	0.842	0.5	0.9045	0.75	0.9873	0.8	1.0132	0.875	1.0685	0.9	1.0959	0.95	1.1895	111	0.8633	4.12248
91	0.05	0.7748	0.1	0.7975	0.125	0.8068	0.2	0.8288	0.25	0.842	0.5	0.9045	0.75	0.9873	0.8	1.0132	0.875	1.0685	0.9	1.0959	0.95	1.1895	111	0.8633	4.12248
92	0.05	0.7748	0.1	0.7975	0.125	0.8068	0.2	0.8288	0.25	0.842	0.5	0.9045	0.75	0.9873	0.8	1.0132	0.875	1.0685	0.9	1.0959	0.95	1.1895	111	0.8633	4.12248
93	0.05	0.7748	0.1	0.7975	0.125	0.8068	0.2	0.8288	0.25	0.842	0.5	0.9045	0.75	0.9873	0.8	1.0132	0.875	1.0685	0.9	1.0959	0.95	1.1895	111	0.8633	4.12248
94	0.05	0.7748	0.1	0.7975	0.125	0.8068	0.2	0.8288	0.25	0.842	0.5	0.9045	0.75	0.9873	0.8	1.0132	0.875	1.0685	0.9	1.0959	0.95	1.1895	111	0.8633	4.12248
95	0.05	0.7748	0.1	0.7975	0.125	0.8068	0.2	0.8288	0.25	0.842	0.5	0.9045	0.75	0.9873	0.8	1.0132	0.875	1.0685	0.9	1.0959	0.95	1.1895	111	0.8633	4.12248
96	0.05	0.7748	0.1	0.7975	0.125	0.8068	0.2	0.8288	0.25	0.842	0.5	0.9045	0.75	0.9873	0.8	1.0132	0.875	1.0685	0.9	1.0959	0.95	1.1895	111	0.8633	4.12248
97	0.05	0.7748	0.1	0.7975	0.125	0.8068	0.2	0.8288	0.25	0.842	0.5	0.9045	0.75	0.9873	0.8	1.0132	0.875	1.0685	0.9	1.0959	0.95	1.1895	111	0.8633	4.12248
98	0.05	0.7748	0.1	0.7975	0.125	0.8068	0.2	0.8288	0.25	0.842	0.5	0.9045	0.75	0.9873	0.8	1.0132	0.875	1.0685	0.9	1.0959	0.95	1.1895	111	0.8633	4.12248
99	0.05	0.7748	0.1	0.7975	0.125	0.8068	0.2	0.8288	0.25	0.842	0.5	0.9045	0.75	0.9873	0.8	1.0132	0.875	1.0685	0.9	1.0959	0.95	1.1895	111	0.8633	4.12248
100	0.05	0.7748	0.1	0.7975	0.125	0.8068	0.2	0.8288	0.25	0.842	0.5	0.9045	0.75	0.9873	0.8	1.0132	0.875	1.0685	0.9	1.0959	0.95	1.1895	111	0.8633	4.12248
101	0.05	0.7748	0.1	0.7975	0.125	0.8068	0.2	0.8288	0.25	0.842	0.5	0.9045	0.75	0.9873	0.8	1.0132	0.875	1.0685	0.9	1.0959	0.95	1.1895	111	0.8633	4.12248
102	0.05	0.7748	0.1	0.7975	0.125	0.8068	0.2	0.8288	0.25	0.842	0.5	0.9045	0.75	0.9873	0.8	1.0132	0.875	1.0685	0.9	1.0959	0.95	1.1895	111	0.8633	4.12248
103	0.05	0.7748	0.1	0.7975	0.125	0.8068	0.2	0.8288	0.25	0.842	0.5	0.9045	0.75	0.9873	0.8	1.0132	0.875	1.0685	0.9	1.0959	0.95	1.1895	111	0.8633	4.12248
104	0.05	0.7748	0.1	0.7975	0.125	0.8068	0.2	0.8288	0.25	0.842	0.5	0.9045	0.75	0.9873	0.8	1.0132	0.875	1.0685	0.9	1.0959	0.95	1.1895	111	0.8633	4.12248
105	0.05	0.7748	0.1	0.7975	0.125	0.8068	0.2	0.8288	0.25	0.842	0.5	0.9045	0.75	0.9873	0.8	1.0132	0.875	1.0685	0.9	1.0959	0.95	1.1895	111	0.8633	4.12248
106	0.05	0.7748	0.1	0.7975	0.125	0.8068	0.2	0.8288	0.25	0.842	0.5	0.9045	0.75	0.9873	0.8	1.0132	0.875	1.0685	0.9	1.0959	0.95	1.1895	111	0.8633	4.12248
107	0.05	0.7748	0.1	0.7975	0.125	0.8068	0.2	0.8288	0.25	0.842	0.5	0.9045	0.75	0.9873	0.8	1.0132	0.875	1.0685	0.9	1.0959	0.95	1.1895	111	0.8633	4.12248
108	0.05	0.7748	0.1	0.7975	0.125	0.8068	0.2	0.8288	0.25	0.842	0.5	0.9045	0.75	0.9873	0.8	1.0132	0.875	1.0685	0.9	1.0959	0.95	1.1895	111	0.8633	4.12248
109	0.05	0.7748	0.1	0.7975	0.125	0.8068	0.2	0.8288	0.25	0.842	0.5	0.9045	0.75	0.9873	0.8	1.0132	0.875	1.0685	0.9	1.0959	0.95	1.1895	111	0.8633	4.12248
110	0.05	0.7748	0.1	0.7975	0.125	0.8068	0.2	0.8288	0.25	0.842	0.5	0.9045	0.75	0.9873	0.8	1.0132	0.875	1.0685	0.9	1.0959	0.95	1.1895	111	0.8633	4.12248
111	0.05	0.7748	0.1	0.7975	0.125	0.8068	0.2	0.8288	0.25	0.842	0.5	0.9045	0.75	0.9873	0.8	1.0132	0.875	1.0685	0.9	1.0959	0.95	1.1895	111	0.8633	4.12248
112	0.05	0.7748	0.1	0.7975	0.125	0.8068	0.2	0.8288	0.25	0.842	0.5	0.9045	0.75	0.9873	0.8	1.0132	0.875	1.0685	0.9	1.0959	0.95	1.1895	111	0.8633	4.12248
113	0.05	0.7748	0.1	0.7975	0.125	0.8068	0.2	0.8288	0.25	0.842	0.5	0.9045	0.75	0.9873	0.8	1.0132	0.875	1.0685	0.9	1.0959	0.95	1.1895	111	0.8633	4.12248
114	0.05	0.7748	0.1	0.7975	0.125	0.8068	0.2	0.8288	0.25	0.842	0.5	0.9045	0.75	0.9873	0.8	1.0132	0.875	1.0685	0.9	1.0959	0.95	1.1895	111	0.8633	4.12248
115	0.05	0.7748	0.1	0.7975	0.125	0.8068	0.2	0.8288	0.25	0.842	0.5	0.9045	0.75	0.9873	0.8	1.0132	0.875	1.0685	0.9	1.0959	0.95	1.1895	111	0.8633	4.12248
116	0.05	0.7748	0.1	0.7975	0.125	0.8068	0.2	0.8288	0.25	0.842	0.5	0.9045	0.75	0.9873	0.8	1.0132	0.875	1.0685	0.9	1.0959	0.95	1.1895	111	0.8633	4.12248
117	0.05	0.7748	0.1	0.7975	0.125	0.8068	0.2	0.8288	0.25	0.842	0.5	0.9045	0.75	0.9873	0.8	1.0132	0.875	1.0685	0.9	1.0959	0.95	1.1895	111	0.8633	4.12248
118	0.05	0.7748	0.1	0.7975	0.125	0.8068	0.2	0.8288	0.25	0.842	0.5	0.9045	0.75	0.9873	0.8	1.0132	0.875	1.0685	0.9	1.0959	0.95	1.1895	111	0.8633	4.12248
119	0.05	0.7748	0.1	0.7975	0.125	0.8068	0.2	0.8288	0.25	0.842	0.5	0.9045	0.75	0.9873	0.8	1.0132	0.875	1.0685	0.9	1.0959	0.95	1.1895	111	0.8633	4.12248
120	0.05	0.7748	0.1	0.7975	0.125	0.8068	0.2	0.8288	0.25	0.842	0.5	0.9045	0.75	0.9873	0.8	1.0132	0.875	1.0685	0.9	1.0959	0.95	1.1895	111	0.8633	4.12248
121	0.05	0.7748	0.1	0.7975	0.125	0.8068	0.2	0.8288	0.25	0.842	0.5	0.9045	0.75	0.9873	0.8	1.0132	0.875	1.0685	0.9	1.0959	0.95	1.1895	111	0.8633	4.12248
122	0.05	0.7748	0.1	0.7975	0.125	0.8068	0.2	0.8288	0.25	0.842	0.5	0.9045	0.75	0.9873	0.8	1.0132	0.875	1.0685	0.9	1.0959	0.95	1.1895	111	0.8633	4.12248
123	0.05	0.7748	0.1	0.7975	0.125	0.8068	0.2	0.8288	0.25	0.842	0.5	0.9045	0.75	0.9873	0.8	1.0132	0.875	1.0685	0.9	1.0959	0.95	1.1895	111	0.8633	4.12248
124	0.05	0.7748	0.1	0.7975	0.125	0.8068	0.2	0.8288	0.25	0.842	0.5	0.9045	0.75	0.9873	0.8	1.0132	0.875	1.0685	0.9	1.0959	0.95	1.1895	111	0.8633	4.12248
125	0.05	0.7748	0.1	0.7975	0.125	0.8068	0.2	0.8288	0.25	0.842	0.5	0.9045	0.75	0.9873	0.8	1.0132	0.875	1.0685	0.9	1.0959	0.95	1.1895	111	0.8633	4.12248
126	0.05	0.7748	0.1	0.7975	0.125	0.8068	0.2	0.8288	0.25	0.842	0.5	0.9045	0.75	0.9873	0.8	1.0132	0.875	1.0685	0.9	1.0959	0.95	1.1895	111	0.8633	4.12248
127	0.05	0.7748	0.1	0.7975	0.125	0.8068	0.2	0.8288	0.25	0.842	0.5	0.9045	0.75	0.9873	0.8	1.0132	0.875	1.0685	0.9	1.0959	0.95	1.1895	111	0.8633	4.12248
128	0.05	0.7748	0.1	0.7975	0.125	0.8068	0.2	0.8288	0.25	0.842	0.5	0.9045	0.75	0.9873	0.8	1.0132	0.875	1.0685	0.9	1.0959	0.95	1.1895	111	0.8633	4.12248
129	0.05	0.7748	0.1	0.7975	0.125	0.8068	0.2	0.8288	0.25	0.842	0.5	0.9045	0.75	0.9873	0.8	1.0132	0.875	1.0685	0.9	1.0959	0.95	1.1895	111	0.8633	4.12248
130	0.05	0.7748	0.1	0.7975	0.125	0.8068	0.2	0.8288	0.25	0.842	0.5	0.9045	0.75	0.9873	0.8	1.0132	0.875	1.0685	0.9	1.0959	0.95	1.1895	111	0.8633	4.12248
131	0.05	0.7748	0.1	0.7975	0.125	0.8068	0.2	0.8288	0.25	0.842	0.5	0.9045	0.75	0.9873	0.8	1.0132	0.875	1.0685	0.9	1.0959	0.95	1.1895	111	0.8633	4.12248
132	0.05	0.7748	0.1	0.7975	0.125	0.8068	0.2	0.8288	0.25	0.842	0.5	0.9045	0.75	0.9873	0.8	1.0132	0.875	1.0685	0.9	1.0959	0.95	1.1895	111	0.8633	4.12248
133	0.05	0.7748	0.1	0.7975	0.125	0.8068	0.2	0.8288	0.25	0.842	0.5	0.9045	0.75	0.9873	0.8	1.0132	0.875	1.0685	0.9	1.0959	0.95	1.1895	111	0.8633	4.12248
134	0.05	0.7748	0.1	0.7975	0.125	0.8068	0.2	0.8288	0.25	0.842	0.5	0.9045	0.75	0.9873	0.8	1.0132	0.875	1.0685	0.9	1.0959	0.95	1.1895	111	0.8633	4.12248
135	0.05	0.7748	0.1	0.7975	0.125	0.8068	0.2	0.8288	0.25	0.842	0.5	0.9045	0.75	0.9873	0.8	1.0132	0.875	1.0685	0.9	1.0959	0.95	1.1895	111	0.8633	4.12248
136	0.05	0.7748	0.1	0.7975	0.125	0.8068	0.2	0.8288	0.25	0.842	0.5	0.9045	0.75	0.9873	0.8	1.0132	0.875	1.0685	0.9	1.0959	0.95	1.1895	111	0.8633	4.12248
137	0.05	0.7748	0.1	0.7975	0.125	0.8068	0.2	0.8288	0.25	0.842	0.5	0.9045	0.75	0.9873	0.8	1.0132	0.875	1.0685	0.9	1.0959	0.95	1.1895	111	0.8633	4.12248
138	0.05	0.7748	0.1	0.7975	0.125	0.8068	0.2	0.8288	0.25	0.842	0.5	0.9045	0.75	0.9873	0.8	1.0132	0.875	1.0685	0.9	1.0959	0.95	1.1895	111	0.8633	4.12248
139	0.05	0.7748	0.1	0.7975	0.125	0.8068	0.2	0.8288	0.25	0.842	0.5	0.9045	0.75	0.9873	0.8	1.0132	0.875	1.0685	0.9	1.0959	0.95	1.1895	111	0.8633	4.12248
140	0.05	0.7748	0.1	0.7975	0.125	0.8068	0.2	0.8288	0.25	0.842	0.5	0.9045	0.75	0.9873	0.8	1.0132	0.875	1.0685	0.9	1.0959	0.95	1.1895	111	0.8633	4.12248
141	0.05	0.7748	0.1	0.7975	0.125	0.8068	0.2	0.8288	0.25	0.842	0.5	0.9045	0.75	0.9873	0.8	1.0132	0.875	1.0685	0.9	1.0959	0.95	1.1895	111	0.8633	4.12248
142	0.05	0.7748	0.1	0.7975	0.125	0.8068	0.2	0.8288	0.25	0.842	0.5	0.9045	0.75	0.9873	0.8	1.0132	0.875	1.0685	0.9	1.0959	0.95	1.1895	111	0.8633	4.12248
143	0.05	0.7748	0.1	0.7975	0.125	0.8068	0.2	0.8288	0.25	0.842	0.5	0.9045	0.75	0.9873	0.8	1.0132	0.875	1.0685	0.9	1.0959	0.95	1.1895	111	0.8633	4.12248
144	0.05	0.7748	0.1	0.7975	0.125	0.8068	0.2	0.8288	0.25	0.842	0.5	0.9045	0.75	0.9873	0.8	1.0132	0.875	1.0685	0.9	1.0959	0.95	1.1895	111	0.8633	4.12248
145	0.05	0.7748	0.1	0.7975	0.125	0.8068	0.2	0.8288	0.25	0.842	0.5	0.9045	0.75	0.9873	0.8	1.0132	0.875	1.0685	0.9	1.0959	0.95	1.1895	111	0.8633	4.12248
146	0.05	0.7748	0.1	0.7975	0.125	0.8068	0.2	0.8288	0.25	0.842	0.5	0.9045	0.75	0.9873	0.8	1.0132	0.875	1.0685	0.9	1.0959	0.95	1.1895	111	0.8633	4.12248
147	0.05	0.7748	0.1	0.7975	0.125	0.8068	0.2	0.8288	0.25	0.842	0.5	0.9045	0.75	0.9873	0.8	1.0132	0.875	1.0685	0.9	1.0959	0.95	1.1895	111	0.8633	4.12248
148	0.05	0.7748	0.1	0.7975	0.125	0.8068	0.2	0.8288	0.25	0.842	0.5	0.9045	0.75	0.9873	0.8	1.0132	0.875	1.0685	0.9	1.0959	0.95	1.1895	111	0.8633	4.12248
149	0.05	0.7748	0.1	0.7975	0.125	0.8068	0.2	0.8288	0.25	0.842	0.5	0.9045	0.75	0.9873	0.8	1.0132	0.875	1.0685	0.9	1.0959	0.95	1.1895	111	0.8633	4.12248
150	0.05	0.7748	0.1	0.7975	0.125	0.8068	0.2	0.8288	0.25	0.842	0.5	0.9045	0.75	0.9873	0.8	1.0132	0.875	1.0685	0.9	1.0959	0.95	1.1895	111	0.8633	4.12248
151	0.05	0.7748	0.1	0.7975	0.125	0.8068	0.2	0.8288	0.25	0.842	0.5	0.9045	0.75	0.9873	0.8	1.0132	0.875	1.0685	0.9	1.0959	0.95	1.1895	111	0.8633	4.12248
152	0.05	0.7748	0.1	0.7975	0.125	0.8068	0.2	0.8288	0.25	0.842	0.5	0.9045	0.75	0.9873	0.8	1.0132	0.875	1.0685	0.9	1.0959	0.95	1.1895	111	0.8633	4.12248
153	0.05	0.7748	0.1	0.7975	0.125	0.8068	0.2	0.8288	0.25	0.842	0.5	0.9045	0.75	0.9873	0.8	1.0132	0.875	1.0685	0.9	1.0959	0.95	1.1895	111	0.8633	4.12248
154	0.05	0.7748	0.1	0.7975	0.125	0.8068	0.2	0.8288	0.25	0.842	0.5	0.9045	0.75	0.9873	0.8	1.0132	0.875	1.0685	0.9	1.0959	0.95	1.1895	111	0.8633	4.12248
155	0.05	0.7748	0.1	0.7975	0.125	0.8068	0.2	0.8288	0.25	0.842	0.5	0.9045	0.75	0.9873	0.8	1.0132	0.875	1.0685	0.9	1.0959	0.95	1.1895	111	0.8633	4.12248
156	0.05	0.7748	0.1	0.7975	0.125	0.8068	0.2	0.8288	0.25	0.842	0.5	0.9045	0.75	0.9873	0.8	1.0132	0.875	1.0685	0.9	1.0959	0.95	1.1895	111	0.8633	4.12248
157	0.05	0.7748	0.1	0.7975	0.125	0.8068	0.2	0.8288	0.25	0.842	0.5	0.9045	0.75	0.9873	0.8	1.0132	0.875	1.0685	0.9	1.0959	0.95	1.1895	111	0.8633	4.12248
158	0.05	0.7748	0.1	0.7975	0.125	0.8068	0.2	0.8288	0.25	0.842	0.5	0.9045	0.75	0.9873	0.8	1.0132	0.875	1.0685	0.9	1.0959	0.95	1.1895	111	0.8633	4.12248
