# Supplementary material for: Time-varying asymmetry and tail thickness in long series of daily financial returns
Source: publisher site journal article supplement (doi:10.1515/snde-2017-0071), 2018-10-02
Supplement: Supplementary file 67 [file thres_ucv.xlsx]

## Sheet: 1
	Var1	Var2	Var3	Var4	Var5	Var6	Var7	Var8	Var9	Var10	Var11	Var12	Var13	Var14	Var15	Var16	Var17	Var18	Var19	Var20	Var21	Var22	Var23	Var24	Var25
1	0	0	0	0	0	0	0	0	0	0	0	0	0	0	0	0	0	0	0	0	0	0	0	0	0
2	0.05	0.6	0.1	0.636	0.125	0.6505	0.2	0.687	0.25	0.7085	0.5	0.818	0.75	0.9745	0.8	1.0265	0.875	1.1415	0.9	1.201	0.95	1.415	111	0.7355	2.39616
3	0.05	0.6	0.1	0.636	0.125	0.6505	0.2	0.687	0.25	0.7085	0.5	0.818	0.75	0.9745	0.8	1.0265	0.875	1.1415	0.9	1.201	0.95	1.415	111	0.7355	2.39616
4	0.05	0.6	0.1	0.636	0.125	0.6505	0.2	0.687	0.25	0.7085	0.5	0.818	0.75	0.9745	0.8	1.0265	0.875	1.1415	0.9	1.201	0.95	1.415	111	0.7355	2.39616
5	0.05	0.6	0.1	0.636	0.125	0.6505	0.2	0.687	0.25	0.7085	0.5	0.818	0.75	0.9745	0.8	1.0265	0.875	1.1415	0.9	1.201	0.95	1.415	111	0.7355	2.39616
6	0.05	0.6	0.1	0.636	0.125	0.6505	0.2	0.687	0.25	0.7085	0.5	0.818	0.75	0.9745	0.8	1.0265	0.875	1.1415	0.9	1.201	0.95	1.415	111	0.7355	2.39616
7	0.05	0.6	0.1	0.636	0.125	0.6505	0.2	0.687	0.25	0.7085	0.5	0.818	0.75	0.9745	0.8	1.0265	0.875	1.1415	0.9	1.201	0.95	1.415	111	0.7355	2.39616
8	0.05	0.6	0.1	0.636	0.125	0.6505	0.2	0.687	0.25	0.7085	0.5	0.818	0.75	0.9745	0.8	1.0265	0.875	1.1415	0.9	1.201	0.95	1.415	111	0.7355	2.39616
9	0.05	0.6	0.1	0.636	0.125	0.6505	0.2	0.687	0.25	0.7085	0.5	0.818	0.75	0.9745	0.8	1.0265	0.875	1.1415	0.9	1.201	0.95	1.415	111	0.7355	2.39616
10	0.05	0.6	0.1	0.636	0.125	0.6505	0.2	0.687	0.25	0.7085	0.5	0.818	0.75	0.9745	0.8	1.0265	0.875	1.1415	0.9	1.201	0.95	1.415	111	0.7355	2.39616
11	0.05	0.6	0.1	0.636	0.125	0.6505	0.2	0.687	0.25	0.7085	0.5	0.818	0.75	0.9745	0.8	1.0265	0.875	1.1415	0.9	1.201	0.95	1.415	111	0.7355	2.39616
12	0.05	0.6	0.1	0.636	0.125	0.6505	0.2	0.687	0.25	0.7085	0.5	0.818	0.75	0.9745	0.8	1.0265	0.875	1.1415	0.9	1.201	0.95	1.415	111	0.7355	2.39616
13	0.05	0.6	0.1	0.636	0.125	0.6505	0.2	0.687	0.25	0.7085	0.5	0.818	0.75	0.9745	0.8	1.0265	0.875	1.1415	0.9	1.201	0.95	1.415	111	0.7355	2.39616
14	0.05	0.6	0.1	0.636	0.125	0.6505	0.2	0.687	0.25	0.7085	0.5	0.818	0.75	0.9745	0.8	1.0265	0.875	1.1415	0.9	1.201	0.95	1.415	111	0.7355	2.39616
15	0.05	0.6	0.1	0.636	0.125	0.6505	0.2	0.687	0.25	0.7085	0.5	0.818	0.75	0.9745	0.8	1.0265	0.875	1.1415	0.9	1.201	0.95	1.415	111	0.7355	2.39616
16	0.05	0.6	0.1	0.636	0.125	0.6505	0.2	0.687	0.25	0.7085	0.5	0.818	0.75	0.9745	0.8	1.0265	0.875	1.1415	0.9	1.201	0.95	1.415	111	0.7355	2.39616
17	0.05	0.6	0.1	0.636	0.125	0.6505	0.2	0.687	0.25	0.7085	0.5	0.818	0.75	0.9745	0.8	1.0265	0.875	1.1415	0.9	1.201	0.95	1.415	111	0.7355	2.39616
18	0.05	0.6	0.1	0.636	0.125	0.6505	0.2	0.687	0.25	0.7085	0.5	0.818	0.75	0.9745	0.8	1.0265	0.875	1.1415	0.9	1.201	0.95	1.415	111	0.7355	2.39616
19	0.05	0.6	0.1	0.636	0.125	0.6505	0.2	0.687	0.25	0.7085	0.5	0.818	0.75	0.9745	0.8	1.0265	0.875	1.1415	0.9	1.201	0.95	1.415	111	0.7355	2.39616
20	0.05	0.6	0.1	0.636	0.125	0.6505	0.2	0.687	0.25	0.7085	0.5	0.818	0.75	0.9745	0.8	1.0265	0.875	1.1415	0.9	1.201	0.95	1.415	111	0.7355	2.39616
21	0.05	0.6	0.1	0.636	0.125	0.6505	0.2	0.687	0.25	0.7085	0.5	0.818	0.75	0.9745	0.8	1.0265	0.875	1.1415	0.9	1.201	0.95	1.415	111	0.7355	2.39616
22	0.05	0.6	0.1	0.636	0.125	0.6505	0.2	0.687	0.25	0.7085	0.5	0.818	0.75	0.9745	0.8	1.0265	0.875	1.1415	0.9	1.201	0.95	1.415	111	0.7355	2.39616
23	0.05	0.6	0.1	0.636	0.125	0.6505	0.2	0.687	0.25	0.7085	0.5	0.818	0.75	0.9745	0.8	1.0265	0.875	1.1415	0.9	1.201	0.95	1.415	111	0.7355	2.39616
24	0.05	0.6	0.1	0.636	0.125	0.6505	0.2	0.687	0.25	0.7085	0.5	0.818	0.75	0.9745	0.8	1.0265	0.875	1.1415	0.9	1.201	0.95	1.415	111	0.7355	2.39616
25	0.05	0.6	0.1	0.636	0.125	0.6505	0.2	0.687	0.25	0.7085	0.5	0.818	0.75	0.9745	0.8	1.0265	0.875	1.1415	0.9	1.201	0.95	1.415	111	0.7355	2.39616
26	0.05	0.6	0.1	0.636	0.125	0.6505	0.2	0.687	0.25	0.7085	0.5	0.818	0.75	0.9745	0.8	1.0265	0.875	1.1415	0.9	1.201	0.95	1.415	111	0.7355	2.39616
27	0.05	0.6	0.1	0.636	0.125	0.6505	0.2	0.687	0.25	0.7085	0.5	0.818	0.75	0.9745	0.8	1.0265	0.875	1.1415	0.9	1.201	0.95	1.415	111	0.7355	2.39616
28	0.05	0.6	0.1	0.636	0.125	0.6505	0.2	0.687	0.25	0.7085	0.5	0.818	0.75	0.9745	0.8	1.0265	0.875	1.1415	0.9	1.201	0.95	1.415	111	0.7355	2.39616
29	0.05	0.6	0.1	0.636	0.125	0.6505	0.2	0.687	0.25	0.7085	0.5	0.818	0.75	0.9745	0.8	1.0265	0.875	1.1415	0.9	1.201	0.95	1.415	111	0.7355	2.39616
30	0.05	0.6	0.1	0.636	0.125	0.6505	0.2	0.687	0.25	0.7085	0.5	0.818	0.75	0.9745	0.8	1.0265	0.875	1.1415	0.9	1.201	0.95	1.415	111	0.7355	2.39616
31	0.05	0.6	0.1	0.636	0.125	0.6505	0.2	0.687	0.25	0.7085	0.5	0.818	0.75	0.9745	0.8	1.0265	0.875	1.1415	0.9	1.201	0.95	1.415	111	0.7355	2.39616
32	0.05	0.6	0.1	0.636	0.125	0.6505	0.2	0.687	0.25	0.7085	0.5	0.818	0.75	0.9745	0.8	1.0265	0.875	1.1415	0.9	1.201	0.95	1.415	111	0.7355	2.39616
33	0.05	0.6	0.1	0.636	0.125	0.6505	0.2	0.687	0.25	0.7085	0.5	0.818	0.75	0.9745	0.8	1.0265	0.875	1.1415	0.9	1.201	0.95	1.415	111	0.7355	2.39616
34	0.05	0.6	0.1	0.636	0.125	0.6505	0.2	0.687	0.25	0.7085	0.5	0.818	0.75	0.9745	0.8	1.0265	0.875	1.1415	0.9	1.201	0.95	1.415	111	0.7355	2.39616
35	0.05	0.6	0.1	0.636	0.125	0.6505	0.2	0.687	0.25	0.7085	0.5	0.818	0.75	0.9745	0.8	1.0265	0.875	1.1415	0.9	1.201	0.95	1.415	111	0.7355	2.39616
36	0.05	0.6	0.1	0.636	0.125	0.6505	0.2	0.687	0.25	0.7085	0.5	0.818	0.75	0.9745	0.8	1.0265	0.875	1.1415	0.9	1.201	0.95	1.415	111	0.7355	2.39616
37	0.05	0.6	0.1	0.636	0.125	0.6505	0.2	0.687	0.25	0.7085	0.5	0.818	0.75	0.9745	0.8	1.0265	0.875	1.1415	0.9	1.201	0.95	1.415	111	0.7355	2.39616
38	0.05	0.6	0.1	0.636	0.125	0.6505	0.2	0.687	0.25	0.7085	0.5	0.818	0.75	0.9745	0.8	1.0265	0.875	1.1415	0.9	1.201	0.95	1.415	111	0.7355	2.39616
39	0.05	0.6	0.1	0.636	0.125	0.6505	0.2	0.687	0.25	0.7085	0.5	0.818	0.75	0.9745	0.8	1.0265	0.875	1.1415	0.9	1.201	0.95	1.415	111	0.7355	2.39616
40	0.05	0.6	0.1	0.636	0.125	0.6505	0.2	0.687	0.25	0.7085	0.5	0.818	0.75	0.9745	0.8	1.0265	0.875	1.1415	0.9	1.201	0.95	1.415	111	0.7355	2.39616
41	0.05	0.6	0.1	0.636	0.125	0.6505	0.2	0.687	0.25	0.7085	0.5	0.818	0.75	0.9745	0.8	1.0265	0.875	1.1415	0.9	1.201	0.95	1.415	111	0.7355	2.39616
42	0.05	0.6	0.1	0.636	0.125	0.6505	0.2	0.687	0.25	0.7085	0.5	0.818	0.75	0.9745	0.8	1.0265	0.875	1.1415	0.9	1.201	0.95	1.415	111	0.7355	2.39616
43	0.05	0.6	0.1	0.636	0.125	0.6505	0.2	0.687	0.25	0.7085	0.5	0.818	0.75	0.9745	0.8	1.0265	0.875	1.1415	0.9	1.201	0.95	1.415	111	0.7355	2.39616
44	0.05	0.6	0.1	0.636	0.125	0.6505	0.2	0.687	0.25	0.7085	0.5	0.818	0.75	0.9745	0.8	1.0265	0.875	1.1415	0.9	1.201	0.95	1.415	111	0.7355	2.39616
45	0.05	0.6	0.1	0.636	0.125	0.6505	0.2	0.687	0.25	0.7085	0.5	0.818	0.75	0.9745	0.8	1.0265	0.875	1.1415	0.9	1.201	0.95	1.415	111	0.7355	2.39616
46	0.05	0.6	0.1	0.636	0.125	0.6505	0.2	0.687	0.25	0.7085	0.5	0.818	0.75	0.9745	0.8	1.0265	0.875	1.1415	0.9	1.201	0.95	1.415	111	0.7355	2.39616
47	0.05	0.6	0.1	0.636	0.125	0.6505	0.2	0.687	0.25	0.7085	0.5	0.818	0.75	0.9745	0.8	1.0265	0.875	1.1415	0.9	1.201	0.95	1.415	111	0.7355	2.39616
48	0.05	0.6	0.1	0.636	0.125	0.6505	0.2	0.687	0.25	0.7085	0.5	0.818	0.75	0.9745	0.8	1.0265	0.875	1.1415	0.9	1.201	0.95	1.415	111	0.7355	2.39616
49	0.05	0.6	0.1	0.636	0.125	0.6505	0.2	0.687	0.25	0.7085	0.5	0.818	0.75	0.9745	0.8	1.0265	0.875	1.1415	0.9	1.201	0.95	1.415	111	0.7355	2.39616
50	0.05	0.6	0.1	0.636	0.125	0.6505	0.2	0.687	0.25	0.7085	0.5	0.818	0.75	0.9745	0.8	1.0265	0.875	1.1415	0.9	1.201	0.95	1.415	111	0.7355	2.39616
51	0.05	0.6	0.1	0.636	0.125	0.6505	0.2	0.687	0.25	0.7085	0.5	0.818	0.75	0.9745	0.8	1.0265	0.875	1.1415	0.9	1.201	0.95	1.415	111	0.7355	2.39616
52	0.05	0.6	0.1	0.636	0.125	0.6505	0.2	0.687	0.25	0.7085	0.5	0.818	0.75	0.9745	0.8	1.0265	0.875	1.1415	0.9	1.201	0.95	1.415	111	0.7355	2.39616
53	0.05	0.6	0.1	0.636	0.125	0.6505	0.2	0.687	0.25	0.7085	0.5	0.818	0.75	0.9745	0.8	1.0265	0.875	1.1415	0.9	1.201	0.95	1.415	111	0.7355	2.39616
54	0.05	0.6	0.1	0.636	0.125	0.6505	0.2	0.687	0.25	0.7085	0.5	0.818	0.75	0.9745	0.8	1.0265	0.875	1.1415	0.9	1.201	0.95	1.415	111	0.7355	2.39616
55	0.05	0.6	0.1	0.636	0.125	0.6505	0.2	0.687	0.25	0.7085	0.5	0.818	0.75	0.9745	0.8	1.0265	0.875	1.1415	0.9	1.201	0.95	1.415	111	0.7355	2.39616
56	0.05	0.6	0.1	0.636	0.125	0.6505	0.2	0.687	0.25	0.7085	0.5	0.818	0.75	0.9745	0.8	1.0265	0.875	1.1415	0.9	1.201	0.95	1.415	111	0.7355	2.39616
57	0.05	0.6	0.1	0.636	0.125	0.6505	0.2	0.687	0.25	0.7085	0.5	0.818	0.75	0.9745	0.8	1.0265	0.875	1.1415	0.9	1.201	0.95	1.415	111	0.7355	2.39616
58	0.05	0.6	0.1	0.636	0.125	0.6505	0.2	0.687	0.25	0.7085	0.5	0.818	0.75	0.9745	0.8	1.0265	0.875	1.1415	0.9	1.201	0.95	1.415	111	0.7355	2.39616
59	0.05	0.6	0.1	0.636	0.125	0.6505	0.2	0.687	0.25	0.7085	0.5	0.818	0.75	0.9745	0.8	1.0265	0.875	1.1415	0.9	1.201	0.95	1.415	111	0.7355	2.39616
60	0.05	0.6	0.1	0.636	0.125	0.6505	0.2	0.687	0.25	0.7085	0.5	0.818	0.75	0.9745	0.8	1.0265	0.875	1.1415	0.9	1.201	0.95	1.415	111	0.7355	2.39616
61	0.05	0.6	0.1	0.636	0.125	0.6505	0.2	0.687	0.25	0.7085	0.5	0.818	0.75	0.9745	0.8	1.0265	0.875	1.1415	0.9	1.201	0.95	1.415	111	0.7355	2.39616
62	0.05	0.6	0.1	0.636	0.125	0.6505	0.2	0.687	0.25	0.7085	0.5	0.818	0.75	0.9745	0.8	1.0265	0.875	1.1415	0.9	1.201	0.95	1.415	111	0.7355	2.39616
63	0.05	0.6	0.1	0.636	0.125	0.6505	0.2	0.687	0.25	0.7085	0.5	0.818	0.75	0.9745	0.8	1.0265	0.875	1.1415	0.9	1.201	0.95	1.415	111	0.7355	2.39616
64	0.05	0.6	0.1	0.636	0.125	0.6505	0.2	0.687	0.25	0.7085	0.5	0.818	0.75	0.9745	0.8	1.0265	0.875	1.1415	0.9	1.201	0.95	1.415	111	0.7355	2.39616
65	0.05	0.6	0.1	0.636	0.125	0.6505	0.2	0.687	0.25	0.7085	0.5	0.818	0.75	0.9745	0.8	1.0265	0.875	1.1415	0.9	1.201	0.95	1.415	111	0.7355	2.39616
66	0.05	0.6	0.1	0.636	0.125	0.6505	0.2	0.687	0.25	0.7085	0.5	0.818	0.75	0.9745	0.8	1.0265	0.875	1.1415	0.9	1.201	0.95	1.415	111	0.7355	2.39616
67	0.05	0.6	0.1	0.636	0.125	0.6505	0.2	0.687	0.25	0.7085	0.5	0.818	0.75	0.9745	0.8	1.0265	0.875	1.1415	0.9	1.201	0.95	1.415	111	0.7355	2.39616
68	0.05	0.6	0.1	0.636	0.125	0.6505	0.2	0.687	0.25	0.7085	0.5	0.818	0.75	0.9745	0.8	1.0265	0.875	1.1415	0.9	1.201	0.95	1.415	111	0.7355	2.39616
69	0.05	0.6	0.1	0.636	0.125	0.6505	0.2	0.687	0.25	0.7085	0.5	0.818	0.75	0.9745	0.8	1.0265	0.875	1.1415	0.9	1.201	0.95	1.415	111	0.7355	2.39616
70	0.05	0.6	0.1	0.636	0.125	0.6505	0.2	0.687	0.25	0.7085	0.5	0.818	0.75	0.9745	0.8	1.0265	0.875	1.1415	0.9	1.201	0.95	1.415	111	0.7355	2.39616
71	0.05	0.6	0.1	0.636	0.125	0.6505	0.2	0.687	0.25	0.7085	0.5	0.818	0.75	0.9745	0.8	1.0265	0.875	1.1415	0.9	1.201	0.95	1.415	111	0.7355	2.39616
72	0.05	0.6	0.1	0.636	0.125	0.6505	0.2	0.687	0.25	0.7085	0.5	0.818	0.75	0.9745	0.8	1.0265	0.875	1.1415	0.9	1.201	0.95	1.415	111	0.7355	2.39616
73	0.05	0.6	0.1	0.636	0.125	0.6505	0.2	0.687	0.25	0.7085	0.5	0.818	0.75	0.9745	0.8	1.0265	0.875	1.1415	0.9	1.201	0.95	1.415	111	0.7355	2.39616
74	0.05	0.6	0.1	0.636	0.125	0.6505	0.2	0.687	0.25	0.7085	0.5	0.818	0.75	0.9745	0.8	1.0265	0.875	1.1415	0.9	1.201	0.95	1.415	111	0.7355	2.39616
75	0.05	0.6	0.1	0.636	0.125	0.6505	0.2	0.687	0.25	0.7085	0.5	0.818	0.75	0.9745	0.8	1.0265	0.875	1.1415	0.9	1.201	0.95	1.415	111	0.7355	2.39616
76	0.05	0.6	0.1	0.636	0.125	0.6505	0.2	0.687	0.25	0.7085	0.5	0.818	0.75	0.9745	0.8	1.0265	0.875	1.1415	0.9	1.201	0.95	1.415	111	0.7355	2.39616
77	0.05	0.6	0.1	0.636	0.125	0.6505	0.2	0.687	0.25	0.7085	0.5	0.818	0.75	0.9745	0.8	1.0265	0.875	1.1415	0.9	1.201	0.95	1.415	111	0.7355	2.39616
78	0.05	0.6	0.1	0.636	0.125	0.6505	0.2	0.687	0.25	0.7085	0.5	0.818	0.75	0.9745	0.8	1.0265	0.875	1.1415	0.9	1.201	0.95	1.415	111	0.7355	2.39616
79	0.05	0.6	0.1	0.636	0.125	0.6505	0.2	0.687	0.25	0.7085	0.5	0.818	0.75	0.9745	0.8	1.0265	0.875	1.1415	0.9	1.201	0.95	1.415	111	0.7355	2.39616
80	0.05	0.6	0.1	0.636	0.125	0.6505	0.2	0.687	0.25	0.7085	0.5	0.818	0.75	0.9745	0.8	1.0265	0.875	1.1415	0.9	1.201	0.95	1.415	111	0.7355	2.39616
81	0.05	0.6	0.1	0.636	0.125	0.6505	0.2	0.687	0.25	0.7085	0.5	0.818	0.75	0.9745	0.8	1.0265	0.875	1.1415	0.9	1.201	0.95	1.415	111	0.7355	2.39616
82	0.05	0.6	0.1	0.636	0.125	0.6505	0.2	0.687	0.25	0.7085	0.5	0.818	0.75	0.9745	0.8	1.0265	0.875	1.1415	0.9	1.201	0.95	1.415	111	0.7355	2.39616
83	0.05	0.6	0.1	0.636	0.125	0.6505	0.2	0.687	0.25	0.7085	0.5	0.818	0.75	0.9745	0.8	1.0265	0.875	1.1415	0.9	1.201	0.95	1.415	111	0.7355	2.39616
84	0.05	0.6	0.1	0.636	0.125	0.6505	0.2	0.687	0.25	0.7085	0.5	0.818	0.75	0.9745	0.8	1.0265	0.875	1.1415	0.9	1.201	0.95	1.415	111	0.7355	2.39616
85	0.05	0.6	0.1	0.636	0.125	0.6505	0.2	0.687	0.25	0.7085	0.5	0.818	0.75	0.9745	0.8	1.0265	0.875	1.1415	0.9	1.201	0.95	1.415	111	0.7355	2.39616
86	0.05	0.6	0.1	0.636	0.125	0.6505	0.2	0.687	0.25	0.7085	0.5	0.818	0.75	0.9745	0.8	1.0265	0.875	1.1415	0.9	1.201	0.95	1.415	111	0.7355	2.39616
87	0.05	0.6	0.1	0.636	0.125	0.6505	0.2	0.687	0.25	0.7085	0.5	0.818	0.75	0.9745	0.8	1.0265	0.875	1.1415	0.9	1.201	0.95	1.415	111	0.7355	2.39616
88	0.05	0.6	0.1	0.636	0.125	0.6505	0.2	0.687	0.25	0.7085	0.5	0.818	0.75	0.9745	0.8	1.0265	0.875	1.1415	0.9	1.201	0.95	1.415	111	0.7355	2.39616
89	0.05	0.6	0.1	0.636	0.125	0.6505	0.2	0.687	0.25	0.7085	0.5	0.818	0.75	0.9745	0.8	1.0265	0.875	1.1415	0.9	1.201	0.95	1.415	111	0.7355	2.39616
90	0.05	0.6	0.1	0.636	0.125	0.6505	0.2	0.687	0.25	0.7085	0.5	0.818	0.75	0.9745	0.8	1.0265	0.875	1.1415	0.9	1.201	0.95	1.415	111	0.7355	2.39616
91	0.05	0.6	0.1	0.636	0.125	0.6505	0.2	0.687	0.25	0.7085	0.5	0.818	0.75	0.9745	0.8	1.0265	0.875	1.1415	0.9	1.201	0.95	1.415	111	0.7355	2.39616
92	0.05	0.6	0.1	0.636	0.125	0.6505	0.2	0.687	0.25	0.7085	0.5	0.818	0.75	0.9745	0.8	1.0265	0.875	1.1415	0.9	1.201	0.95	1.415	111	0.7355	2.39616
93	0.05	0.6	0.1	0.636	0.125	0.6505	0.2	0.687	0.25	0.7085	0.5	0.818	0.75	0.9745	0.8	1.0265	0.875	1.1415	0.9	1.201	0.95	1.415	111	0.7355	2.39616
94	0.05	0.6	0.1	0.636	0.125	0.6505	0.2	0.687	0.25	0.7085	0.5	0.818	0.75	0.9745	0.8	1.0265	0.875	1.1415	0.9	1.201	0.95	1.415	111	0.7355	2.39616
95	0.05	0.6	0.1	0.636	0.125	0.6505	0.2	0.687	0.25	0.7085	0.5	0.818	0.75	0.9745	0.8	1.0265	0.875	1.1415	0.9	1.201	0.95	1.415	111	0.7355	2.39616
96	0.05	0.6	0.1	0.636	0.125	0.6505	0.2	0.687	0.25	0.7085	0.5	0.818	0.75	0.9745	0.8	1.0265	0.875	1.1415	0.9	1.201	0.95	1.415	111	0.7355	2.39616
97	0.05	0.6	0.1	0.636	0.125	0.6505	0.2	0.687	0.25	0.7085	0.5	0.818	0.75	0.9745	0.8	1.0265	0.875	1.1415	0.9	1.201	0.95	1.415	111	0.7355	2.39616
98	0.05	0.6	0.1	0.636	0.125	0.6505	0.2	0.687	0.25	0.7085	0.5	0.818	0.75	0.9745	0.8	1.0265	0.875	1.1415	0.9	1.201	0.95	1.415	111	0.7355	2.39616
99	0.05	0.6	0.1	0.636	0.125	0.6505	0.2	0.687	0.25	0.7085	0.5	0.818	0.75	0.9745	0.8	1.0265	0.875	1.1415	0.9	1.201	0.95	1.415	111	0.7355	2.39616
100	0.05	0.6	0.1	0.636	0.125	0.6505	0.2	0.687	0.25	0.7085	0.5	0.818	0.75	0.9745	0.8	1.0265	0.875	1.1415	0.9	1.201	0.95	1.415	111	0.7355	2.39616
101	0.05	0.6	0.1	0.636	0.125	0.6505	0.2	0.687	0.25	0.7085	0.5	0.818	0.75	0.9745	0.8	1.0265	0.875	1.1415	0.9	1.201	0.95	1.415	111	0.7355	2.39616
102	0.05	0.6	0.1	0.636	0.125	0.6505	0.2	0.687	0.25	0.7085	0.5	0.818	0.75	0.9745	0.8	1.0265	0.875	1.1415	0.9	1.201	0.95	1.415	111	0.7355	2.39616
103	0.05	0.6	0.1	0.636	0.125	0.6505	0.2	0.687	0.25	0.7085	0.5	0.818	0.75	0.9745	0.8	1.0265	0.875	1.1415	0.9	1.201	0.95	1.415	111	0.7355	2.39616
104	0.05	0.6	0.1	0.636	0.125	0.6505	0.2	0.687	0.25	0.7085	0.5	0.818	0.75	0.9745	0.8	1.0265	0.875	1.1415	0.9	1.201	0.95	1.415	111	0.7355	2.39616
105	0.05	0.6	0.1	0.636	0.125	0.6505	0.2	0.687	0.25	0.7085	0.5	0.818	0.75	0.9745	0.8	1.0265	0.875	1.1415	0.9	1.201	0.95	1.415	111	0.7355	2.39616
106	0.05	0.6	0.1	0.636	0.125	0.6505	0.2	0.687	0.25	0.7085	0.5	0.818	0.75	0.9745	0.8	1.0265	0.875	1.1415	0.9	1.201	0.95	1.415	111	0.7355	2.39616
107	0.05	0.6	0.1	0.636	0.125	0.6505	0.2	0.687	0.25	0.7085	0.5	0.818	0.75	0.9745	0.8	1.0265	0.875	1.1415	0.9	1.201	0.95	1.415	111	0.7355	2.39616
108	0.05	0.6	0.1	0.636	0.125	0.6505	0.2	0.687	0.25	0.7085	0.5	0.818	0.75	0.9745	0.8	1.0265	0.875	1.1415	0.9	1.201	0.95	1.415	111	0.7355	2.39616
109	0.05	0.6	0.1	0.636	0.125	0.6505	0.2	0.687	0.25	0.7085	0.5	0.818	0.75	0.9745	0.8	1.0265	0.875	1.1415	0.9	1.201	0.95	1.415	111	0.7355	2.39616
110	0.05	0.6	0.1	0.636	0.125	0.6505	0.2	0.687	0.25	0.7085	0.5	0.818	0.75	0.9745	0.8	1.0265	0.875	1.1415	0.9	1.201	0.95	1.415	111	0.7355	2.39616
111	0.05	0.6	0.1	0.636	0.125	0.6505	0.2	0.687	0.25	0.7085	0.5	0.818	0.75	0.9745	0.8	1.0265	0.875	1.1415	0.9	1.201	0.95	1.415	111	0.7355	2.39616
112	0.05	0.6	0.1	0.636	0.125	0.6505	0.2	0.687	0.25	0.7085	0.5	0.818	0.75	0.9745	0.8	1.0265	0.875	1.1415	0.9	1.201	0.95	1.415	111	0.7355	2.39616
113	0.05	0.6	0.1	0.636	0.125	0.6505	0.2	0.687	0.25	0.7085	0.5	0.818	0.75	0.9745	0.8	1.0265	0.875	1.1415	0.9	1.201	0.95	1.415	111	0.7355	2.39616
114	0.05	0.6	0.1	0.636	0.125	0.6505	0.2	0.687	0.25	0.7085	0.5	0.818	0.75	0.9745	0.8	1.0265	0.875	1.1415	0.9	1.201	0.95	1.415	111	0.7355	2.39616
115	0.05	0.6	0.1	0.636	0.125	0.6505	0.2	0.687	0.25	0.7085	0.5	0.818	0.75	0.9745	0.8	1.0265	0.875	1.1415	0.9	1.201	0.95	1.415	111	0.7355	2.39616
116	0.05	0.6	0.1	0.636	0.125	0.6505	0.2	0.687	0.25	0.7085	0.5	0.818	0.75	0.9745	0.8	1.0265	0.875	1.1415	0.9	1.201	0.95	1.415	111	0.7355	2.39616
117	0.05	0.6	0.1	0.636	0.125	0.6505	0.2	0.687	0.25	0.7085	0.5	0.818	0.75	0.9745	0.8	1.0265	0.875	1.1415	0.9	1.201	0.95	1.415	111	0.7355	2.39616
118	0.05	0.6	0.1	0.636	0.125	0.6505	0.2	0.687	0.25	0.7085	0.5	0.818	0.75	0.9745	0.8	1.0265	0.875	1.1415	0.9	1.201	0.95	1.415	111	0.7355	2.39616
119	0.05	0.6	0.1	0.636	0.125	0.6505	0.2	0.687	0.25	0.7085	0.5	0.818	0.75	0.9745	0.8	1.0265	0.875	1.1415	0.9	1.201	0.95	1.415	111	0.7355	2.39616
120	0.05	0.6	0.1	0.636	0.125	0.6505	0.2	0.687	0.25	0.7085	0.5	0.818	0.75	0.9745	0.8	1.0265	0.875	1.1415	0.9	1.201	0.95	1.415	111	0.7355	2.39616
121	0.05	0.6	0.1	0.636	0.125	0.6505	0.2	0.687	0.25	0.7085	0.5	0.818	0.75	0.9745	0.8	1.0265	0.875	1.1415	0.9	1.201	0.95	1.415	111	0.7355	2.39616
122	0.05	0.6	0.1	0.636	0.125	0.6505	0.2	0.687	0.25	0.7085	0.5	0.818	0.75	0.9745	0.8	1.0265	0.875	1.1415	0.9	1.201	0.95	1.415	111	0.7355	2.39616
123	0.05	0.6	0.1	0.636	0.125	0.6505	0.2	0.687	0.25	0.7085	0.5	0.818	0.75	0.9745	0.8	1.0265	0.875	1.1415	0.9	1.201	0.95	1.415	111	0.7355	2.39616
124	0.05	0.6	0.1	0.636	0.125	0.6505	0.2	0.687	0.25	0.7085	0.5	0.818	0.75	0.9745	0.8	1.0265	0.875	1.1415	0.9	1.201	0.95	1.415	111	0.7355	2.39616
125	0.05	0.6	0.1	0.636	0.125	0.6505	0.2	0.687	0.25	0.7085	0.5	0.818	0.75	0.9745	0.8	1.0265	0.875	1.1415	0.9	1.201	0.95	1.415	111	0.7355	2.39616
126	0.05	0.6	0.1	0.636	0.125	0.6505	0.2	0.687	0.25	0.7085	0.5	0.818	0.75	0.9745	0.8	1.0265	0.875	1.1415	0.9	1.201	0.95	1.415	111	0.7355	2.39616
127	0.05	0.6	0.1	0.636	0.125	0.6505	0.2	0.687	0.25	0.7085	0.5	0.818	0.75	0.9745	0.8	1.0265	0.875	1.1415	0.9	1.201	0.95	1.415	111	0.7355	2.39616
128	0.05	0.6	0.1	0.636	0.125	0.6505	0.2	0.687	0.25	0.7085	0.5	0.818	0.75	0.9745	0.8	1.0265	0.875	1.1415	0.9	1.201	0.95	1.415	111	0.7355	2.39616
129	0.05	0.6	0.1	0.636	0.125	0.6505	0.2	0.687	0.25	0.7085	0.5	0.818	0.75	0.9745	0.8	1.0265	0.875	1.1415	0.9	1.201	0.95	1.415	111	0.7355	2.39616
130	0.05	0.6	0.1	0.636	0.125	0.6505	0.2	0.687	0.25	0.7085	0.5	0.818	0.75	0.9745	0.8	1.0265	0.875	1.1415	0.9	1.201	0.95	1.415	111	0.7355	2.39616
131	0.05	0.6	0.1	0.636	0.125	0.6505	0.2	0.687	0.25	0.7085	0.5	0.818	0.75	0.9745	0.8	1.0265	0.875	1.1415	0.9	1.201	0.95	1.415	111	0.7355	2.39616
132	0.05	0.6	0.1	0.636	0.125	0.6505	0.2	0.687	0.25	0.7085	0.5	0.818	0.75	0.9745	0.8	1.0265	0.875	1.1415	0.9	1.201	0.95	1.415	111	0.7355	2.39616
133	0.05	0.6	0.1	0.636	0.125	0.6505	0.2	0.687	0.25	0.7085	0.5	0.818	0.75	0.9745	0.8	1.0265	0.875	1.1415	0.9	1.201	0.95	1.415	111	0.7355	2.39616
134	0.05	0.6	0.1	0.636	0.125	0.6505	0.2	0.687	0.25	0.7085	0.5	0.818	0.75	0.9745	0.8	1.0265	0.875	1.1415	0.9	1.201	0.95	1.415	111	0.7355	2.39616
135	0.05	0.6	0.1	0.636	0.125	0.6505	0.2	0.687	0.25	0.7085	0.5	0.818	0.75	0.9745	0.8	1.0265	0.875	1.1415	0.9	1.201	0.95	1.415	111	0.7355	2.39616
136	0.05	0.6	0.1	0.636	0.125	0.6505	0.2	0.687	0.25	0.7085	0.5	0.818	0.75	0.9745	0.8	1.0265	0.875	1.1415	0.9	1.201	0.95	1.415	111	0.7355	2.39616
137	0.05	0.6	0.1	0.636	0.125	0.6505	0.2	0.687	0.25	0.7085	0.5	0.818	0.75	0.9745	0.8	1.0265	0.875	1.1415	0.9	1.201	0.95	1.415	111	0.7355	2.39616
138	0.05	0.6	0.1	0.636	0.125	0.6505	0.2	0.687	0.25	0.7085	0.5	0.818	0.75	0.9745	0.8	1.0265	0.875	1.1415	0.9	1.201	0.95	1.415	111	0.7355	2.39616
139	0.05	0.6	0.1	0.636	0.125	0.6505	0.2	0.687	0.25	0.7085	0.5	0.818	0.75	0.9745	0.8	1.0265	0.875	1.1415	0.9	1.201	0.95	1.415	111	0.7355	2.39616
140	0.05	0.6	0.1	0.636	0.125	0.6505	0.2	0.687	0.25	0.7085	0.5	0.818	0.75	0.9745	0.8	1.0265	0.875	1.1415	0.9	1.201	0.95	1.415	111	0.7355	2.39616
141	0.05	0.6	0.1	0.636	0.125	0.6505	0.2	0.687	0.25	0.7085	0.5	0.818	0.75	0.9745	0.8	1.0265	0.875	1.1415	0.9	1.201	0.95	1.415	111	0.7355	2.39616
142	0.05	0.6	0.1	0.636	0.125	0.6505	0.2	0.687	0.25	0.7085	0.5	0.818	0.75	0.9745	0.8	1.0265	0.875	1.1415	0.9	1.201	0.95	1.415	111	0.7355	2.39616
143	0.05	0.6	0.1	0.636	0.125	0.6505	0.2	0.687	0.25	0.7085	0.5	0.818	0.75	0.9745	0.8	1.0265	0.875	1.1415	0.9	1.201	0.95	1.415	111	0.7355	2.39616
144	0.05	0.6	0.1	0.636	0.125	0.6505	0.2	0.687	0.25	0.7085	0.5	0.818	0.75	0.9745	0.8	1.0265	0.875	1.1415	0.9	1.201	0.95	1.415	111	0.7355	2.39616
145	0.05	0.6	0.1	0.636	0.125	0.6505	0.2	0.687	0.25	0.7085	0.5	0.818	0.75	0.9745	0.8	1.0265	0.875	1.1415	0.9	1.201	0.95	1.415	111	0.7355	2.39616
146	0.05	0.6	0.1	0.636	0.125	0.6505	0.2	0.687	0.25	0.7085	0.5	0.818	0.75	0.9745	0.8	1.0265	0.875	1.1415	0.9	1.201	0.95	1.415	111	0.7355	2.39616
147	0.05	0.6	0.1	0.636	0.125	0.6505	0.2	0.687	0.25	0.7085	0.5	0.818	0.75	0.9745	0.8	1.0265	0.875	1.1415	0.9	1.201	0.95	1.415	111	0.7355	2.39616
148	0.05	0.6	0.1	0.636	0.125	0.6505	0.2	0.687	0.25	0.7085	0.5	0.818	0.75	0.9745	0.8	1.0265	0.875	1.1415	0.9	1.201	0.95	1.415	111	0.7355	2.39616
149	0.05	0.6	0.1	0.636	0.125	0.6505	0.2	0.687	0.25	0.7085	0.5	0.818	0.75	0.9745	0.8	1.0265	0.875	1.1415	0.9	1.201	0.95	1.415	111	0.7355	2.39616
150	0.05	0.6	0.1	0.636	0.125	0.6505	0.2	0.687	0.25	0.7085	0.5	0.818	0.75	0.9745	0.8	1.0265	0.875	1.1415	0.9	1.201	0.95	1.415	111	0.7355	2.39616
151	0.05	0.6	0.1	0.636	0.125	0.6505	0.2	0.687	0.25	0.7085	0.5	0.818	0.75	0.9745	0.8	1.0265	0.875	1.1415	0.9	1.201	0.95	1.415	111	0.7355	2.39616
152	0.05	0.6	0.1	0.636	0.125	0.6505	0.2	0.687	0.25	0.7085	0.5	0.818	0.75	0.9745	0.8	1.0265	0.875	1.1415	0.9	1.201	0.95	1.415	111	0.7355	2.39616
153	0.05	0.6	0.1	0.636	0.125	0.6505	0.2	0.687	0.25	0.7085	0.5	0.818	0.75	0.9745	0.8	1.0265	0.875	1.1415	0.9	1.201	0.95	1.415	111	0.7355	2.39616
154	0.05	0.6	0.1	0.636	0.125	0.6505	0.2	0.687	0.25	0.7085	0.5	0.818	0.75	0.9745	0.8	1.0265	0.875	1.1415	0.9	1.201	0.95	1.415	111	0.7355	2.39616
155	0.05	0.6	0.1	0.636	0.125	0.6505	0.2	0.687	0.25	0.7085	0.5	0.818	0.75	0.9745	0.8	1.0265	0.875	1.1415	0.9	1.201	0.95	1.415	111	0.7355	2.39616
156	0.05	0.6	0.1	0.636	0.125	0.6505	0.2	0.687	0.25	0.7085	0.5	0.818	0.75	0.9745	0.8	1.0265	0.875	1.1415	0.9	1.201	0.95	1.415	111	0.7355	2.39616
157	0.05	0.6	0.1	0.636	0.125	0.6505	0.2	0.687	0.25	0.7085	0.5	0.818	0.75	0.9745	0.8	1.0265	0.875	1.1415	0.9	1.201	0.95	1.415	111	0.7355	2.39616
158	0.05	0.6	0.1	0.636	0.125	0.6505	0.2	0.687	0.25	0.7085	0.5	0.818	0.75	0.9745	0.8	1.0265	0.875	1.1415	0.9	1.201	0.95	1.415	111	0.7355	2.39616
