# Supplementary material for: Time-varying asymmetry and tail thickness in long series of daily financial returns
Source: publisher site journal article supplement (doi:10.1515/snde-2017-0071), 2018-10-02
Supplement: Supplementary file 73 [file acc_summary.xlsx]

## Sheet: 1
	Var1	Var2	Var3	Var4
1	0.105682	0.0712925	0.117269	0.151207
2	0.0482779	0.0690704	0.0766097	0.151207
3	0.0625628	0.0674303	0.0415322	0.151207
4	0.0192318	0.0279615	0.000343897	0.151207
5	0.163589	0.198349	0.319983	0.151207
6	0.0736204	0.18425	0.191551	0.151207
7	0.189937	0.189831	0.184223	0.151207
8	0.337099	0.191815	0.0684884	0.151207
