# Supplementary material for: Time-varying asymmetry and tail thickness in long series of daily financial returns
Source: publisher site journal article supplement (doi:10.1515/snde-2017-0071), 2018-10-02
Supplement: Supplementary file 75 [file add_par_res.xlsx]

## Sheet: 1
	(a1+a2)/2+b1	a0/[1-(a1+a2)/2-b1]	[a0/(1-(a1+a2)/2-b1)]^0.5	ni2/ni1	Var5	per_1	per_2	per_3	per_4
1	0.0920997	0.0302226	0.0425118	0.0488721	0.0496685	23.1716	10.8494	5.89213	4.33957
2	0.0113501	0.00566277	0.005155	0.00430035	0.00348947	8.71627	3.78277	0.8919	0.679811
