# Supplementary material for: Time-varying asymmetry and tail thickness in long series of daily financial returns
Source: publisher site journal article supplement (doi:10.1515/snde-2017-0071), 2018-10-02
Supplement: Supplementary file 77 [file cvm1.xlsx]

## Sheet: 1
	Var1	Var2	Var3	Var4	Var5	Var6	Var7	Var8	Var9	Var10	Var11	Var12	Var13	Var14	Var15	Var16	Var17	Var18	Var19	Var20	Var21	Var22
1	0.00035056	-3.42133e-05	0.000140035	-5.25018e-05	3.85854e-05	6.97327e-05	-0.000514727	-0.000150217	0.000137737	-3.28462e-06	-0.000317717	-0.000718831	-0.000165044	-0.000196105	0.00104102	-0.00140521	0.000407993	-0.000304018	-0.0058855	-0.00348736	0.00490152	0.000926103
2	-3.42133e-05	0.000283164	-0.000100607	-1.5235e-05	-0.000450006	-0.000458894	5.84996e-05	0.000102998	-0.000139147	-4.03666e-05	-0.000129395	-0.000161293	-0.000302847	-0.000345349	0.000695022	1.54329e-05	-0.000172175	6.84073e-06	-0.000409069	0.00043777	-0.0010308	0.00184989
3	0.000140035	-0.000100607	0.0259265	0.000244914	-0.0039854	-0.00404757	-0.000369272	-0.00669815	-0.00440136	-0.000425474	-0.0112127	-0.00824206	-0.00689794	-0.00202702	0.00741613	-0.00602395	-0.00332771	0.000681485	-0.0630903	-0.0127522	0.0306865	0.0133714
4	-5.25018e-05	-1.5235e-05	0.000244914	0.00367987	-0.00125409	-0.0063978	8.36548e-05	0.000864467	0.000651306	5.47017e-05	-0.00136961	0.000912078	-0.000250007	-0.000858673	0.00127747	-0.00106578	0.000222382	4.31132e-05	-0.00419435	-0.000807665	0.00108927	-0.00131769
5	3.85854e-05	-0.000450006	-0.0039854	-0.00125409	0.0135154	0.0168889	-0.000208618	-0.000701235	-0.00033367	0.000466101	0.00102727	-0.00170145	0.000347076	0.000523792	0.00243531	-0.00265267	0.00239835	-0.00136476	-0.00111613	-0.00922088	0.00963113	-0.00171366
6	6.97327e-05	-0.000458894	-0.00404757	-0.0063978	0.0168889	0.0289843	-0.000266113	-0.00222471	-0.00129473	0.000439991	0.00256792	-0.00340235	0.000617317	0.00182272	0.00101592	-0.00128371	0.00209536	-0.0016406	0.0035658	-0.00921231	0.0090147	-0.000167856
7	-0.000514727	5.84996e-05	-0.000369272	8.36548e-05	-0.000208618	-0.000266113	0.000841971	0.000418466	-0.000313504	-1.33043e-05	0.000398464	0.00132604	0.000199871	0.000300193	-0.00155489	0.00229249	-0.000620489	0.000484167	0.00986258	0.00573918	-0.00850836	-0.00145943
8	-0.000150217	0.000102998	-0.00669815	0.000864467	-0.000701235	-0.00222471	0.000418466	0.0112093	-0.00319414	0.00142833	0.00164204	0.00126148	0.000524643	0.000680974	-0.00130316	-0.000347154	0.000346518	0.000812126	0.00942545	0.00208746	-0.00779749	0.00107361
9	0.000137737	-0.000139147	-0.00440136	0.000651306	-0.00033367	-0.00129473	-0.000313504	-0.00319414	0.0167325	-0.00183331	-0.00267683	0.00181476	-0.000644347	-8.49514e-05	-0.00500412	0.00519369	-0.0026053	-0.00111406	0.00596261	0.00778046	-0.00465683	-0.00943851
10	-3.28462e-06	-4.03666e-05	-0.000425474	5.47017e-05	0.000466101	0.000439991	-1.33043e-05	0.00142833	-0.00183331	0.000598334	0.000664263	-0.000484827	0.000152571	0.000307394	0.00035282	-0.00117641	0.000452902	7.90238e-05	-0.000851267	-0.00215465	0.00186062	0.00109478
11	-0.000317717	-0.000129395	-0.0112127	-0.00136961	0.00102727	0.00256792	0.000398464	0.00164204	-0.00267683	0.000664263	0.0873511	0.00534107	0.0252881	0.016103	-0.0172596	-0.00317283	0.0167712	-0.00552295	0.126698	-0.0224325	0.0225494	0.0166206
12	-0.000718831	-0.000161293	-0.00824206	0.000912078	-0.00170145	-0.00340235	0.00132604	0.00126148	0.00181476	-0.000484827	0.00534107	0.0436661	0.0126667	0.00594844	-0.0305503	0.0219321	0.00287466	0.00410261	0.123526	0.0486145	-0.068297	-0.0209678
13	-0.000165044	-0.000302847	-0.00689794	-0.000250007	0.000347076	0.000617317	0.000199871	0.000524643	-0.000644347	0.000152571	0.0252881	0.0126667	0.0344253	0.00311811	-0.0173188	0.00427528	0.0101122	0.00136244	0.088165	0.010614	-0.015629	-0.043578
14	-0.000196105	-0.000345349	-0.00202702	-0.000858673	0.000523792	0.00182272	0.000300193	0.000680974	-8.49514e-05	0.000307394	0.016103	0.00594844	0.00311811	0.0190287	-0.0128802	0.00454022	-0.00224029	0.00154152	0.0497984	0.00733796	0.00532633	0.00642279
15	0.00104102	0.000695022	0.00741613	0.00127747	0.00243531	0.00101592	-0.00155489	-0.00130316	-0.00500412	0.00035282	-0.0172596	-0.0305503	-0.0173188	-0.0128802	0.0926675	-0.0500203	0.00521737	-0.0083617	-0.186802	-0.088066	0.0814918	0.0465415
16	-0.00140521	1.54329e-05	-0.00602395	-0.00106578	-0.00265267	-0.00128371	0.00229249	-0.000347154	0.00519369	-0.00117641	-0.00317283	0.0219321	0.00427528	0.00454022	-0.0500203	0.0581353	-0.0109673	0.00411561	0.14785	0.0869158	-0.107945	-0.0368882
17	0.000407993	-0.000172175	-0.00332771	0.000222382	0.00239835	0.00209536	-0.000620489	0.000346518	-0.0026053	0.000452902	0.0167712	0.00287466	0.0101122	-0.00224029	0.00521737	-0.0109673	0.0223661	-0.00348162	0.00846204	-0.0224358	0.00779484	0.0188925
18	-0.000304018	6.84073e-06	0.000681485	4.31132e-05	-0.00136476	-0.0016406	0.000484167	0.000812126	-0.00111406	7.90238e-05	-0.00552295	0.00410261	0.00136244	0.00154152	-0.0083617	0.00411561	-0.00348162	0.0162075	0.0130102	0.0123734	-0.0211668	-0.0190311
19	-0.0058855	-0.000409069	-0.0630903	-0.00419435	-0.00111613	0.0035658	0.00986258	0.00942545	0.00596261	-0.000851267	0.126698	0.123526	0.088165	0.0497984	-0.186802	0.14785	0.00846204	0.0130102	0.993103	0.2988	-0.458378	-0.166729
20	-0.00348736	0.00043777	-0.0127522	-0.000807665	-0.00922088	-0.00921231	0.00573918	0.00208746	0.00778046	-0.00215465	-0.0224325	0.0486145	0.010614	0.00733796	-0.088066	0.0869158	-0.0224358	0.0123734	0.2988	0.207615	-0.224044	-0.10065
21	0.00490152	-0.0010308	0.0306865	0.00108927	0.00963113	0.0090147	-0.00850836	-0.00779749	-0.00465683	0.00186062	0.0225494	-0.068297	-0.015629	0.00532633	0.0814918	-0.107945	0.00779484	-0.0211668	-0.458378	-0.224044	0.532022	0.0446931
22	0.000926103	0.00184989	0.0133714	-0.00131769	-0.00171366	-0.000167856	-0.00145943	0.00107361	-0.00943851	0.00109478	0.0166206	-0.0209678	-0.043578	0.00642279	0.0465415	-0.0368882	0.0188925	-0.0190311	-0.166729	-0.10065	0.0446931	0.501807
