# Supplementary material for: Time-varying asymmetry and tail thickness in long series of daily financial returns
Source: publisher site journal article supplement (doi:10.1515/snde-2017-0071), 2018-10-02
Supplement: Supplementary file 81 [file cvm_ip.xlsx]

## Sheet: 1
	delta	rho	alpha0	fi1	beta1	d	lambda1	ni1	ni2	a00	gamma_s0	gamma_s1	gamma_s2	gamma_s3	gamma_c0	gamma_c1	gamma_c2	gamma_c3	phi0	phi1	phi2	phi3
1	0.00035056	-1.66869e-05	6.9605e-06	-5.25018e-05	8.15865e-06	1.75364e-05	-0.000514727	-0.000504858	0.000747764	-1.04659e-06	-0.000317717	-0.000718831	-0.000165044	-0.000196105	0.00104102	-0.00140521	0.000407993	-0.000304018	-4.0812e-06	-8.80504e-06	-3.19839e-06	-9.89164e-07
2	-1.66869e-05	6.73039e-05	-2.05728e-06	-7.44062e-06	-5.25974e-05	-5.54449e-05	2.85352e-05	0.000162148	-0.000436953	-6.25098e-06	-6.28783e-05	-7.84825e-05	-0.000147286	-0.000168404	0.000339088	7.33292e-06	-8.34615e-05	3.56183e-06	-1.55747e-07	2.623e-08	-6.83618e-07	2.60784e-07
3	6.9605e-06	-2.05728e-06	6.32757e-05	1.49673e-05	-4.83932e-05	-5.00945e-05	-1.79575e-05	-0.0011187	-0.00110713	-7.1912e-06	-0.000579715	-0.000408246	-0.000365103	-0.000111407	0.000375305	-0.000294051	-0.000165819	4.06584e-05	-1.63658e-06	-2.64557e-06	-1.31808e-06	-1.38638e-07
4	-5.25018e-05	-7.44062e-06	1.49673e-05	0.00367987	-0.000281031	-0.00158546	8.36548e-05	0.00290902	0.0032126	1.7407e-05	-0.00136961	0.000912078	-0.000250007	-0.000858673	0.00127747	-0.00106578	0.000222382	4.31132e-05	-1.92868e-06	-2.95615e-06	-6.78577e-07	-1.80874e-06
5	8.15865e-06	-5.25974e-05	-4.83932e-05	-0.000281031	0.000776835	0.000996525	-4.7754e-05	-0.00051971	-0.000153306	3.56487e-05	0.00024134	-0.000380891	0.00011361	0.000126052	0.000571622	-0.000617986	0.000579068	-0.00032921	-8.42652e-07	-3.74568e-06	-8.40275e-07	-4.05753e-07
6	1.75364e-05	-5.54449e-05	-5.00945e-05	-0.00158546	0.000996525	0.00178	-6.63834e-05	-0.00184471	-0.00138484	3.45867e-05	0.00063722	-0.000845745	0.000151073	0.000452042	0.000255204	-0.000321851	0.000518934	-0.000406036	-4.83741e-07	-3.62299e-06	-1.03448e-06	-2.5856e-09
7	-0.000514727	2.85352e-05	-1.79575e-05	8.36548e-05	-4.7754e-05	-6.63834e-05	0.000841971	0.00140298	-0.00167818	-4.23138e-06	0.000398464	0.00132604	0.000199871	0.000300193	-0.00155489	0.00229249	-0.000620489	0.000484167	7.02816e-06	1.47773e-05	5.22234e-06	1.49549e-06
8	-0.000504858	0.000162148	-0.0011187	0.00290902	-0.00051971	-0.00184471	0.00140298	0.128533	-0.0564074	0.00152995	0.0053613	0.00420801	0.00159325	0.0022991	-0.00435696	-0.00113578	0.000949233	0.00269091	1.76502e-05	2.96669e-05	4.53718e-06	-7.36992e-06
9	0.000747764	-0.000436953	-0.00110713	0.0032126	-0.000153306	-0.00138484	-0.00167818	-0.0564074	0.464871	-0.00303734	-0.0143777	0.00972595	-0.00335501	0.000720808	-0.0288059	0.0293052	-0.0149821	-0.00570257	2.7045e-05	9.4499e-05	5.56006e-05	-5.80909e-06
10	-1.04659e-06	-6.25098e-06	-7.1912e-06	1.7407e-05	3.56487e-05	3.45867e-05	-4.23138e-06	0.00152995	-0.00303734	6.05486e-05	0.000211323	-0.000154202	4.85203e-05	9.7822e-05	0.000112182	-0.000374194	0.000144029	2.51713e-05	-4.40282e-07	-1.31762e-06	-5.42186e-07	-2.52689e-07
11	-0.000317717	-6.28783e-05	-0.000579715	-0.00136961	0.00024134	0.00063722	0.000398464	0.0053613	-0.0143777	0.000211323	0.0873511	0.00534107	0.0252881	0.016103	-0.0172596	-0.00317283	0.0167712	-0.00552295	3.03382e-05	7.93031e-06	4.74867e-05	6.1211e-05
12	-0.000718831	-7.84825e-05	-0.000408246	0.000912078	-0.000380891	-0.000845745	0.00132604	0.00420801	0.00972595	-0.000154202	0.00534107	0.0436661	0.0126667	0.00594844	-0.0305503	0.0219321	0.00287466	0.00410261	7.7637e-05	0.000152322	8.61141e-05	4.97017e-05
13	-0.000165044	-0.000147286	-0.000365103	-0.000250007	0.00011361	0.000151073	0.000199871	0.00159325	-0.00335501	4.85203e-05	0.0252881	0.0126667	0.0344253	0.00311811	-0.0173188	0.00427528	0.0101122	0.00136244	3.56763e-05	5.79977e-05	5.1325e-05	2.74351e-06
14	-0.000196105	-0.000168404	-0.000111407	-0.000858673	0.000126052	0.000452042	0.000300193	0.0022991	0.000720808	9.7822e-05	0.016103	0.00594844	0.00311811	0.0190287	-0.0128802	0.00454022	-0.00224029	0.00154152	2.04665e-05	3.33406e-05	3.84797e-05	4.28983e-05
15	0.00104102	0.000339088	0.000375305	0.00127747	0.000571622	0.000255204	-0.00155489	-0.00435696	-0.0288059	0.000112182	-0.0172596	-0.0305503	-0.0173188	-0.0128802	0.0926675	-0.0500203	0.00521737	-0.0083617	-0.000101325	-0.000241467	-0.000137559	-5.60665e-05
16	-0.00140521	7.33292e-06	-0.000294051	-0.00106578	-0.000617986	-0.000321851	0.00229249	-0.00113578	0.0293052	-0.000374194	-0.00317283	0.0219321	0.00427528	0.00454022	-0.0500203	0.0581353	-0.0109673	0.00411561	9.67079e-05	0.000223455	9.04283e-05	2.60476e-05
17	0.000407993	-8.34615e-05	-0.000165819	0.000222382	0.000579068	0.000518934	-0.000620489	0.000949233	-0.0149821	0.000144029	0.0167712	0.00287466	0.0101122	-0.00224029	0.00521737	-0.0109673	0.0223661	-0.00348162	-3.57832e-06	-3.50553e-05	-1.2595e-05	7.8656e-06
18	-0.000304018	3.56183e-06	4.06584e-05	4.31132e-05	-0.00032921	-0.000406036	0.000484167	0.00269091	-0.00570257	2.51713e-05	-0.00552295	0.00410261	0.00136244	0.00154152	-0.0083617	0.00411561	-0.00348162	0.0162075	1.44992e-05	3.35243e-05	1.22808e-05	-1.14161e-05
19	-4.0812e-06	-1.55747e-07	-1.63658e-06	-1.92868e-06	-8.42652e-07	-4.83741e-07	7.02816e-06	1.76502e-05	2.7045e-05	-4.40282e-07	3.03382e-05	7.7637e-05	3.56763e-05	2.04665e-05	-0.000101325	9.67079e-05	-3.57832e-06	1.44992e-05	3.25769e-07	6.09268e-07	2.61565e-07	9.68515e-08
20	-8.80504e-06	2.623e-08	-2.64557e-06	-2.95615e-06	-3.74568e-06	-3.62299e-06	1.47773e-05	2.96669e-05	9.4499e-05	-1.31762e-06	7.93031e-06	0.000152322	5.79977e-05	3.33406e-05	-0.000241467	0.000223455	-3.50553e-05	3.35243e-05	6.09268e-07	1.33087e-06	5.88204e-07	1.63063e-07
21	-3.19839e-06	-6.83618e-07	-1.31808e-06	-6.78577e-07	-8.40275e-07	-1.03448e-06	5.22234e-06	4.53718e-06	5.56006e-05	-5.42186e-07	4.74867e-05	8.61141e-05	5.1325e-05	3.84797e-05	-0.000137559	9.04283e-05	-1.2595e-05	1.22808e-05	2.61565e-07	5.88204e-07	4.33653e-07	1.89726e-07
22	-9.89164e-07	2.60784e-07	-1.38638e-07	-1.80874e-06	-4.05753e-07	-2.5856e-09	1.49549e-06	-7.36992e-06	-5.80909e-06	-2.52689e-07	6.1211e-05	4.97017e-05	2.74351e-06	4.28983e-05	-5.60665e-05	2.60476e-05	7.8656e-06	-1.14161e-05	9.68515e-08	1.63063e-07	1.89726e-07	5.33244e-07
