# Supplementary material for: Time-varying asymmetry and tail thickness in long series of daily financial returns
Source: publisher site journal article supplement (doi:10.1515/snde-2017-0071), 2018-10-02
Supplement: Supplementary file 101 [file m2.xlsx]

## Sheet: 1
	Var1	Var2	Var3	Var4	Var5	Var6	Var7	Var8	Var9	Var10	Var11	Var12	Var13	Var14	Var15	Var16	Var17	Var18	Var19	Var20	Var21	Var22
1	0.0242266	0.157158	0.0500365	0.711071	0.719694	0.470795	0.0300319	5.38773	7.19881	0.498132	-0.0994327	-0.11912	-0.0400576	-0.00253147	0.184077	-0.0413677	0.110643	0.0792489	0.00128435	0.00270805	0.00434585	0.00588054
