# Supplementary material for: Time-varying asymmetry and tail thickness in long series of daily financial returns
Source: publisher site journal article supplement (doi:10.1515/snde-2017-0071), 2018-10-02
Supplement: Supplementary file 107 [file mq.xlsx]

## Sheet: 1
	quantile	delta	rho	alpha0	fi1	beta1	d	lambda1	ni1	ni2	a00	gamma_s0	gamma_s1	gamma_s2	gamma_s3	gamma_c0	gamma_c1	gamma_c2	gamma_c3	phi0	phi1	phi2	phi3
1	0.005	-0.0199	0.13807	0.03135	0.55497	0.6489	0.37936	-0.05423	4.5464	5.6761	0.477546	-0.8161	-0.59	-0.4351	-0.36055	-0.5015	-0.4938	-0.26525	-0.21825	0.0006454	0.00162	0.0028738	0.0036747
2	0.01	-0.01568	0.139624	0.03259	0.5694	0.65463	0.38536	-0.04675	4.6198	5.8083	0.479663	-0.7664	-0.5651	-0.4101	-0.30625	-0.4604	-0.47	-0.2255	-0.2081	0.0006493	0.0016524	0.0029117	0.003697
3	0.015	-0.01337	0.140631	0.033555	0.57729	0.65842	0.38915	-0.04137	4.666	5.9236	0.481185	-0.7261	-0.5371	-0.3972	-0.2892	-0.433	-0.4498	-0.2044	-0.19675	0.0006526	0.0016758	0.0029451	0.0037125
4	0.02	-0.01168	0.141319	0.034465	0.58407	0.66179	0.39281	-0.03746	4.7002	5.9854	0.482093	-0.7087	-0.5224	-0.38555	-0.2777	-0.3955	-0.437	-0.19045	-0.18705	0.0006578	0.0016855	0.0029748	0.0037238
5	0.025	-0.01045	0.141901	0.03515	0.58909	0.66402	0.3965	-0.03324	4.7312	6.0307	0.482891	-0.6815	-0.5042	-0.3727	-0.26545	-0.3749	-0.4287	-0.17925	-0.1771	0.0006624	0.0016962	0.0030213	0.0037352
6	0.03	-0.00937	0.142325	0.035745	0.59398	0.66644	0.39936	-0.02829	4.7545	6.0692	0.483491	-0.6645	-0.4874	-0.3627	-0.2565	-0.3626	-0.4229	-0.17235	-0.1701	0.0006666	0.0017041	0.0031062	0.0037501
7	0.035	-0.00836	0.142662	0.0363	0.59824	0.66847	0.40167	-0.02524	4.7785	6.0995	0.483951	-0.6501	-0.4781	-0.3548	-0.24845	-0.3502	-0.4164	-0.16465	-0.16485	0.0006731	0.0017097	0.0031852	0.0037685
8	0.04	-0.00746	0.143006	0.03676	0.60158	0.67001	0.40374	-0.02273	4.7983	6.13	0.484411	-0.6366	-0.4687	-0.34925	-0.24175	-0.3391	-0.4106	-0.1568	-0.1597	0.0006797	0.0017155	0.0032588	0.0038013
9	0.045	-0.00644	0.14332	0.037155	0.60546	0.67142	0.40524	-0.02058	4.8141	6.1557	0.484754	-0.6193	-0.4599	-0.34425	-0.2336	-0.3286	-0.4044	-0.1482	-0.1553	0.0006838	0.0017208	0.0034371	0.0038909
10	0.05	-0.0057	0.143566	0.037545	0.6095	0.67288	0.4067	-0.01847	4.8286	6.1821	0.485152	-0.5988	-0.4509	-0.34025	-0.2258	-0.3154	-0.3995	-0.1393	-0.15165	0.0006871	0.0017264	0.0036488	0.0045072
11	0.055	-0.005	0.143881	0.037835	0.61286	0.67419	0.40822	-0.01678	4.8423	6.204	0.485544	-0.5835	-0.4439	-0.3364	-0.2189	-0.3058	-0.3941	-0.1326	-0.14795	0.0006893	0.0017301	0.003667	0.0045422
12	0.06	-0.00435	0.14421	0.038145	0.61641	0.67533	0.40967	-0.0153	4.8554	6.2301	0.485891	-0.5681	-0.4379	-0.33285	-0.2131	-0.2987	-0.3883	-0.1268	-0.1443	0.0006914	0.0017341	0.003675	0.0045657
13	0.065	-0.00364	0.144582	0.03841	0.61866	0.67637	0.41103	-0.01365	4.8671	6.2503	0.486208	-0.5533	-0.4294	-0.32945	-0.20805	-0.2908	-0.3826	-0.122	-0.14035	0.0006948	0.0017377	0.003681	0.0045865
14	0.07	-0.0029	0.144926	0.038705	0.62134	0.67761	0.41239	-0.01246	4.8792	6.2738	0.486545	-0.5386	-0.4226	-0.326	-0.20315	-0.2846	-0.3775	-0.1161	-0.13675	0.0006973	0.0017413	0.0036866	0.0046043
15	0.075	-0.00222	0.145281	0.03895	0.62369	0.67862	0.41363	-0.01144	4.8913	6.2969	0.486881	-0.5276	-0.4177	-0.32305	-0.1992	-0.2798	-0.3736	-0.1112	-0.13265	0.0006991	0.0017449	0.0036916	0.0046172
16	0.08	-0.00166	0.14554	0.03918	0.62592	0.67952	0.41486	-0.01038	4.9014	6.3174	0.487138	-0.5176	-0.4125	-0.3194	-0.1957	-0.275	-0.3685	-0.10705	-0.1287	0.0007013	0.001748	0.0036954	0.0046348
17	0.085	-0.00111	0.145789	0.039405	0.62806	0.6806	0.41594	-0.00952	4.9144	6.3354	0.487423	-0.5072	-0.407	-0.31625	-0.1919	-0.2692	-0.3652	-0.1032	-0.1241	0.0007045	0.0017511	0.0036989	0.0046455
18	0.09	-0.00052	0.146044	0.039645	0.62998	0.68147	0.41705	-0.00853	4.9236	6.3523	0.487694	-0.4959	-0.3998	-0.3123	-0.1883	-0.2624	-0.362	-0.1	-0.11965	0.0007073	0.0017541	0.0037024	0.0046545
19	0.095	-5e-05	0.146357	0.03988	0.6321	0.68238	0.418	-0.0076	4.9333	6.3697	0.487925	-0.4875	-0.3922	-0.30755	-0.1848	-0.2568	-0.3583	-0.0963	-0.11545	0.0007105	0.001757	0.0037057	0.0046609
20	0.1	0.00053	0.146632	0.04012	0.6339	0.6834	0.419	-0.00661	4.9411	6.3852	0.488166	-0.48	-0.3873	-0.3043	-0.18175	-0.2505	-0.3549	-0.09265	-0.11145	0.0007139	0.0017596	0.0037082	0.0046667
21	0.105	0.00096	0.146809	0.040305	0.63556	0.68427	0.41991	-0.00577	4.9498	6.3986	0.488398	-0.4733	-0.3812	-0.30075	-0.17785	-0.2444	-0.3513	-0.08895	-0.1074	0.0007191	0.0017624	0.0037111	0.0046728
22	0.11	0.00139	0.147069	0.04052	0.6372	0.68488	0.42081	-0.00506	4.9579	6.418	0.488619	-0.4649	-0.3761	-0.2972	-0.17475	-0.2384	-0.348	-0.0856	-0.10365	0.0007245	0.0017647	0.0037145	0.0046788
23	0.115	0.00188	0.147304	0.04071	0.63873	0.68555	0.42186	-0.00418	4.9657	6.4336	0.488867	-0.4555	-0.3721	-0.294	-0.1716	-0.2306	-0.3445	-0.08225	-0.1	0.0007316	0.001767	0.0037169	0.0046844
24	0.12	0.0023	0.14753	0.04091	0.64002	0.68637	0.42269	-0.0035	4.9731	6.4478	0.489087	-0.4446	-0.3676	-0.29105	-0.16875	-0.2234	-0.3414	-0.07845	-0.09645	0.0007375	0.0017691	0.0037195	0.0046909
25	0.125	0.00275	0.147719	0.04112	0.64142	0.68708	0.42352	-0.00279	4.9811	6.4618	0.489273	-0.4346	-0.363	-0.28795	-0.1657	-0.2189	-0.3384	-0.07545	-0.0932	0.000743	0.0017715	0.0037218	0.0046982
26	0.13	0.00323	0.147918	0.04131	0.64276	0.68774	0.42434	-0.00213	4.9892	6.475	0.489452	-0.4232	-0.3581	-0.28475	-0.16315	-0.2142	-0.334	-0.07205	-0.08965	0.0007471	0.0017734	0.0037243	0.0047084
27	0.135	0.00365	0.148104	0.041475	0.64424	0.68852	0.4251	-0.00152	4.9962	6.4873	0.489657	-0.4149	-0.3535	-0.28155	-0.1601	-0.2097	-0.3304	-0.06785	-0.0861	0.0007509	0.0017756	0.0037267	0.0047208
28	0.14	0.00412	0.148306	0.041625	0.64538	0.68926	0.42578	-0.00104	5.0026	6.501	0.489855	-0.4058	-0.3495	-0.2785	-0.1576	-0.2054	-0.3259	-0.0645	-0.0823	0.0007538	0.0017777	0.003729	0.0047436
29	0.145	0.0045	0.148491	0.04178	0.64672	0.68994	0.4266	-0.00039	5.0093	6.5127	0.490033	-0.3982	-0.345	-0.2755	-0.15525	-0.2015	-0.3214	-0.06105	-0.07825	0.0007577	0.0017797	0.0037315	0.0048184
30	0.15	0.00494	0.148693	0.041945	0.64799	0.69048	0.42737	0.00032	5.0167	6.525	0.490245	-0.3913	-0.3409	-0.2721	-0.152	-0.1961	-0.3169	-0.0586	-0.0752	0.0007622	0.0017815	0.0037338	0.0052266
31	0.155	0.00535	0.148869	0.04208	0.64914	0.69103	0.42807	0.00098	5.0229	6.5372	0.490397	-0.3853	-0.3369	-0.26935	-0.14895	-0.1896	-0.3134	-0.05475	-0.07185	0.0007657	0.0017836	0.0037362	0.0052907
32	0.16	0.00572	0.14903	0.04222	0.65049	0.69157	0.42871	0.0016	5.0296	6.5494	0.490556	-0.379	-0.3336	-0.2659	-0.1468	-0.1823	-0.3105	-0.05165	-0.0678	0.0007707	0.001786	0.003738	0.0054759
33	0.165	0.00609	0.14915	0.042365	0.65182	0.69211	0.42952	0.00223	5.0363	6.5595	0.490733	-0.3741	-0.3305	-0.2628	-0.14385	-0.1763	-0.3073	-0.04825	-0.0644	0.0007768	0.0017877	0.0037402	0.0056493
34	0.17	0.00639	0.149304	0.042505	0.65329	0.69273	0.4304	0.0029	5.0419	6.5715	0.490862	-0.37	-0.3265	-0.25955	-0.1414	-0.1702	-0.3036	-0.0452	-0.06135	0.0007813	0.0017892	0.0037424	0.0056944
35	0.175	0.00674	0.149474	0.042645	0.65445	0.69325	0.43113	0.00353	5.0484	6.5822	0.491022	-0.365	-0.3221	-0.2565	-0.1391	-0.1636	-0.2997	-0.04105	-0.0587	0.0007864	0.001791	0.0037443	0.0057261
36	0.18	0.00711	0.149621	0.04281	0.65548	0.69382	0.43167	0.00414	5.0554	6.5931	0.491137	-0.359	-0.319	-0.2526	-0.1366	-0.1583	-0.296	-0.03755	-0.0561	0.0007907	0.0017924	0.0037464	0.0057468
37	0.185	0.00747	0.149791	0.042955	0.65663	0.69436	0.43237	0.00465	5.0618	6.6036	0.491305	-0.354	-0.3154	-0.24885	-0.1344	-0.1527	-0.2928	-0.03435	-0.05325	0.0007946	0.0017937	0.0037487	0.0057625
38	0.19	0.00778	0.149931	0.043085	0.65778	0.69494	0.433	0.00518	5.069	6.6125	0.491457	-0.3493	-0.3118	-0.24515	-0.13255	-0.1472	-0.2886	-0.03095	-0.05085	0.0007983	0.0017953	0.0037507	0.0057751
39	0.195	0.00806	0.150049	0.043225	0.65879	0.69539	0.43367	0.00566	5.0758	6.6223	0.491621	-0.3442	-0.308	-0.24175	-0.1304	-0.1411	-0.2847	-0.0284	-0.04815	0.000801	0.001797	0.0037528	0.0057894
40	0.2	0.00837	0.150184	0.04336	0.66	0.69592	0.43431	0.00612	5.0816	6.6316	0.49177	-0.3397	-0.3043	-0.238	-0.12815	-0.1349	-0.2799	-0.02485	-0.0455	0.000805	0.0017984	0.0037552	0.0058018
41	0.205	0.00874	0.150336	0.04348	0.66124	0.69635	0.43499	0.00667	5.088	6.64	0.491912	-0.336	-0.3014	-0.23335	-0.1259	-0.1303	-0.2761	-0.02165	-0.0423	0.0008085	0.0018	0.0037573	0.0058142
42	0.21	0.00905	0.150466	0.043605	0.66241	0.69681	0.43569	0.00712	5.0945	6.6491	0.492035	-0.3324	-0.2975	-0.23	-0.12365	-0.1252	-0.2721	-0.01885	-0.03875	0.0008117	0.0018012	0.0037589	0.0058242
43	0.215	0.00936	0.150597	0.043735	0.66359	0.69727	0.43623	0.00764	5.0996	6.6577	0.492151	-0.3287	-0.2937	-0.2261	-0.1215	-0.1191	-0.269	-0.0155	-0.03545	0.0008154	0.0018027	0.003761	0.0058327
44	0.22	0.00969	0.150731	0.043845	0.66484	0.69776	0.43685	0.00819	5.1055	6.6677	0.492263	-0.3256	-0.2904	-0.22225	-0.119	-0.1126	-0.2662	-0.01235	-0.0326	0.0008191	0.001804	0.0037633	0.0058406
45	0.225	0.00998	0.150867	0.043965	0.666	0.69822	0.43752	0.0087	5.1117	6.6791	0.492412	-0.3223	-0.2865	-0.2191	-0.11625	-0.108	-0.2635	-0.00985	-0.0292	0.0008219	0.0018053	0.0037654	0.0058485
46	0.23	0.01033	0.150999	0.044085	0.66701	0.69868	0.43816	0.00928	5.117	6.6903	0.492559	-0.3189	-0.2828	-0.2159	-0.11385	-0.1033	-0.2599	-0.00735	-0.0248	0.0008247	0.0018064	0.0037679	0.0058543
47	0.235	0.01056	0.151093	0.044195	0.66802	0.69915	0.43879	0.0097	5.1218	6.6993	0.492669	-0.3149	-0.2797	-0.2124	-0.11165	-0.0983	-0.2573	-0.0048	-0.02105	0.000828	0.0018075	0.0037697	0.0058612
48	0.24	0.01082	0.151197	0.044295	0.66898	0.69959	0.43935	0.01018	5.1273	6.7092	0.492786	-0.3123	-0.2768	-0.2088	-0.1091	-0.0936	-0.2543	-0.0022	-0.0177	0.0008308	0.0018087	0.0037718	0.005867
49	0.245	0.01109	0.15132	0.0444	0.67002	0.70004	0.43996	0.01071	5.1317	6.7186	0.492905	-0.3095	-0.2743	-0.20485	-0.10665	-0.0889	-0.2515	0.0006	-0.01505	0.0008343	0.0018101	0.0037742	0.0058713
50	0.25	0.01142	0.151459	0.044525	0.67105	0.70048	0.44045	0.01116	5.1368	6.7267	0.493015	-0.306	-0.2713	-0.2003	-0.10415	-0.0837	-0.2491	0.0028	-0.0118	0.000838	0.0018114	0.0037761	0.0058774
51	0.255	0.01169	0.151575	0.044635	0.67196	0.70085	0.44095	0.01163	5.1427	6.7348	0.493134	-0.302	-0.2684	-0.19685	-0.10155	-0.078	-0.2454	0.00515	-0.00945	0.0008407	0.0018124	0.0037783	0.0058837
52	0.26	0.01197	0.151711	0.044775	0.67294	0.70136	0.44156	0.01221	5.1474	6.7434	0.493236	-0.2974	-0.2656	-0.19255	-0.0996	-0.0713	-0.2412	0.00755	-0.00615	0.0008437	0.0018135	0.0037808	0.0058883
53	0.265	0.01227	0.151849	0.044885	0.67397	0.70183	0.44212	0.01269	5.1516	6.7529	0.493355	-0.2943	-0.2627	-0.18955	-0.0972	-0.0638	-0.2371	0.00945	-0.00345	0.0008467	0.0018147	0.0037831	0.0058934
54	0.27	0.01256	0.151949	0.044995	0.67487	0.70224	0.4427	0.0132	5.1563	6.7609	0.493469	-0.2902	-0.2598	-0.18565	-0.09515	-0.0578	-0.234	0.01195	-0.0004	0.0008499	0.0018159	0.0037855	0.0058971
55	0.275	0.01282	0.152084	0.0451	0.67592	0.7027	0.4433	0.01371	5.1616	6.7708	0.493583	-0.2862	-0.2562	-0.1818	-0.09305	-0.0498	-0.2304	0.0148	0.00215	0.0008528	0.0018173	0.0037882	0.0059008
56	0.28	0.01312	0.152214	0.04521	0.67691	0.70306	0.44381	0.01421	5.1674	6.7792	0.493685	-0.2821	-0.2536	-0.1775	-0.0907	-0.0445	-0.2265	0.01725	0.0047	0.000855	0.0018185	0.0037908	0.0059047
57	0.285	0.01338	0.152326	0.04532	0.6778	0.70348	0.44432	0.01454	5.172	6.7885	0.493799	-0.2774	-0.2513	-0.17435	-0.0886	-0.0389	-0.2234	0.01985	0.00755	0.0008576	0.0018197	0.0037937	0.0059084
58	0.29	0.01365	0.152435	0.04544	0.67876	0.7039	0.4448	0.01498	5.1774	6.7986	0.493895	-0.2724	-0.2484	-0.1707	-0.0865	-0.0336	-0.2205	0.02215	0.01055	0.0008598	0.0018207	0.0037971	0.0059127
59	0.295	0.01393	0.152562	0.04555	0.67976	0.70431	0.44531	0.01538	5.1826	6.8062	0.493996	-0.2686	-0.2457	-0.1652	-0.08415	-0.0278	-0.2175	0.0245	0.01355	0.0008629	0.0018217	0.0038008	0.005916
60	0.3	0.01424	0.152692	0.04565	0.68068	0.70474	0.44586	0.01578	5.1884	6.8144	0.494103	-0.2646	-0.2436	-0.16025	-0.0816	-0.0213	-0.2151	0.0271	0.01595	0.0008663	0.0018227	0.0038056	0.0059192
61	0.305	0.01449	0.152798	0.04575	0.68151	0.70516	0.4464	0.01614	5.1928	6.8223	0.494193	-0.2606	-0.2411	-0.15455	-0.07945	-0.0139	-0.2118	0.02955	0.0184	0.0008692	0.0018237	0.0038107	0.0059222
62	0.31	0.01478	0.15293	0.045855	0.68236	0.70556	0.44695	0.01662	5.1974	6.8311	0.494299	-0.2567	-0.239	-0.14845	-0.0773	-0.0068	-0.2081	0.032	0.0207	0.0008717	0.0018248	0.0038168	0.0059253
63	0.315	0.01503	0.153057	0.04597	0.68321	0.70601	0.44762	0.01704	5.2018	6.8416	0.494394	-0.2515	-0.2363	-0.14265	-0.07525	0.0014	-0.2053	0.03455	0.0231	0.0008739	0.0018259	0.003824	0.0059277
64	0.32	0.01533	0.153159	0.046085	0.68416	0.70644	0.44826	0.01754	5.2066	6.8496	0.494495	-0.2473	-0.2339	-0.1379	-0.07295	0.0104	-0.2023	0.03675	0.0255	0.0008761	0.001827	0.0038325	0.0059306
65	0.325	0.01556	0.153286	0.04618	0.68505	0.70688	0.44887	0.01796	5.2108	6.8585	0.494611	-0.2428	-0.2313	-0.1339	-0.0708	0.0183	-0.1993	0.03895	0.02805	0.0008785	0.0018282	0.0038427	0.0059331
66	0.33	0.01582	0.153391	0.04627	0.68596	0.70722	0.44946	0.01837	5.2169	6.8674	0.494727	-0.2395	-0.2289	-0.1299	-0.0686	0.0275	-0.1966	0.04125	0.0303	0.0008807	0.0018294	0.0038604	0.0059365
67	0.335	0.01608	0.153523	0.04637	0.68673	0.70763	0.44999	0.01875	5.2212	6.8751	0.494819	-0.2349	-0.2267	-0.12665	-0.06635	0.0357	-0.1939	0.0437	0.0336	0.0008825	0.0018306	0.0039234	0.0059391
68	0.34	0.01638	0.153629	0.04648	0.68754	0.70802	0.45051	0.01919	5.2258	6.884	0.494922	-0.2304	-0.2241	-0.12305	-0.06385	0.0432	-0.1907	0.04625	0.03545	0.0008845	0.0018316	0.004157	0.0059418
69	0.345	0.01663	0.153752	0.046565	0.6884	0.70848	0.45098	0.01959	5.2313	6.8946	0.495036	-0.2264	-0.2215	-0.11915	-0.06145	0.0512	-0.1876	0.04835	0.0376	0.0008864	0.0018327	0.0041734	0.0059443
70	0.35	0.01686	0.153853	0.04667	0.68906	0.70887	0.45163	0.01997	5.2363	6.9019	0.495143	-0.2223	-0.2187	-0.11455	-0.05915	0.0619	-0.1843	0.0505	0.03945	0.0008889	0.0018337	0.0041837	0.005947
71	0.355	0.01713	0.153946	0.04678	0.68982	0.70926	0.45221	0.02038	5.2409	6.9116	0.495257	-0.218	-0.2161	-0.10995	-0.0572	0.069	-0.1812	0.0534	0.04165	0.0008921	0.0018349	0.0041915	0.0059496
72	0.36	0.01735	0.154043	0.04688	0.69063	0.70961	0.45269	0.02082	5.2448	6.9222	0.495339	-0.2139	-0.2136	-0.1062	-0.055	0.0753	-0.1776	0.05555	0.0433	0.0008943	0.0018359	0.004198	0.0059516
73	0.365	0.01761	0.154148	0.04698	0.69147	0.70999	0.45326	0.02129	5.2496	6.932	0.495431	-0.2102	-0.2108	-0.1019	-0.05315	0.0802	-0.1745	0.0582	0.0454	0.0008965	0.001837	0.0042034	0.0059541
74	0.37	0.01785	0.154274	0.04708	0.69221	0.71035	0.4537	0.02167	5.2542	6.9412	0.495528	-0.2062	-0.2081	-0.0979	-0.05145	0.0865	-0.1706	0.0604	0.0478	0.0009	0.0018383	0.0042078	0.0059562
75	0.375	0.01808	0.154377	0.04719	0.69296	0.71067	0.45428	0.02199	5.2588	6.9499	0.495624	-0.2021	-0.2054	-0.0933	-0.0495	0.0923	-0.1676	0.0627	0.04975	0.0009028	0.0018394	0.0042119	0.0059585
76	0.38	0.01826	0.154469	0.04728	0.69371	0.71107	0.45476	0.02241	5.2634	6.9597	0.495731	-0.1977	-0.2022	-0.09	-0.04745	0.0987	-0.1637	0.065	0.0526	0.000906	0.0018408	0.0042157	0.0059611
77	0.385	0.0185	0.154556	0.04738	0.69455	0.71141	0.45535	0.02285	5.2684	6.9697	0.495839	-0.1939	-0.1993	-0.0858	-0.0457	0.1058	-0.16	0.06765	0.05485	0.0009086	0.0018418	0.0042188	0.0059634
78	0.39	0.01875	0.154671	0.047465	0.6954	0.7118	0.45588	0.02325	5.2734	6.9774	0.49594	-0.1894	-0.1965	-0.0816	-0.04385	0.1131	-0.155	0.07025	0.0571	0.0009128	0.0018428	0.0042225	0.0059655
79	0.395	0.01903	0.154753	0.04756	0.69623	0.71221	0.45643	0.02361	5.2777	6.9863	0.496031	-0.1849	-0.1938	-0.07785	-0.04215	0.1183	-0.1509	0.0722	0.0598	0.0009162	0.0018439	0.0042256	0.0059676
80	0.4	0.01925	0.154865	0.047665	0.69704	0.71267	0.45694	0.02399	5.2823	6.995	0.496128	-0.1799	-0.1912	-0.07405	-0.04035	0.1239	-0.1464	0.0741	0.06195	0.000919	0.0018451	0.0042286	0.0059698
81	0.405	0.01945	0.15495	0.047765	0.6979	0.71312	0.45744	0.02433	5.2861	7.0027	0.496208	-0.1752	-0.1889	-0.0713	-0.03885	0.1305	-0.1428	0.0765	0.06435	0.0009211	0.0018462	0.0042317	0.0059719
82	0.41	0.01967	0.155034	0.04785	0.69861	0.71353	0.45796	0.02473	5.2902	7.0104	0.496305	-0.1709	-0.1861	-0.068	-0.03705	0.1362	-0.1389	0.0785	0.0662	0.0009239	0.0018473	0.0042343	0.0059739
83	0.415	0.01989	0.155138	0.04797	0.69935	0.71392	0.45845	0.02503	5.2952	7.0196	0.496397	-0.1677	-0.1832	-0.06495	-0.0353	0.1448	-0.1351	0.08055	0.068	0.0009269	0.0018485	0.0042377	0.0059761
84	0.42	0.0201	0.155225	0.04807	0.70013	0.71432	0.45888	0.02542	5.2992	7.0273	0.496487	-0.1645	-0.1803	-0.06065	-0.03345	0.1528	-0.1315	0.08265	0.07015	0.0009293	0.0018498	0.0042403	0.0059779
85	0.425	0.02029	0.155318	0.048165	0.70091	0.71472	0.45945	0.0258	5.3033	7.0352	0.496597	-0.1616	-0.1779	-0.0576	-0.0318	0.1645	-0.1285	0.08455	0.07275	0.0009322	0.0018512	0.0042426	0.0059801
86	0.43	0.02049	0.155423	0.048255	0.70164	0.71505	0.46004	0.02614	5.3074	7.0419	0.496691	-0.1577	-0.1753	-0.0547	-0.03	0.1722	-0.1255	0.0868	0.07495	0.0009348	0.0018524	0.0042448	0.0059825
87	0.435	0.02073	0.15552	0.048355	0.70251	0.71545	0.46055	0.02647	5.3121	7.0496	0.496782	-0.1539	-0.173	-0.052	-0.02795	0.179	-0.1225	0.08895	0.07735	0.0009378	0.0018538	0.0042473	0.0059848
88	0.44	0.02097	0.15562	0.04845	0.70312	0.71578	0.46101	0.02681	5.3173	7.0578	0.49688	-0.1484	-0.1705	-0.0497	-0.026	0.1861	-0.1182	0.09145	0.0793	0.0009406	0.001855	0.0042493	0.0059868
89	0.445	0.02121	0.15571	0.048545	0.70403	0.71611	0.46155	0.0272	5.3216	7.065	0.496973	-0.1444	-0.1675	-0.04735	-0.0245	0.1912	-0.1146	0.09345	0.0815	0.0009432	0.0018566	0.0042518	0.0059887
90	0.45	0.02137	0.155814	0.048645	0.70478	0.71642	0.46204	0.02758	5.3262	7.0715	0.497053	-0.1411	-0.165	-0.04425	-0.02285	0.1953	-0.1101	0.09565	0.08385	0.0009465	0.0018581	0.0042541	0.005991
91	0.455	0.02161	0.155896	0.04874	0.70552	0.71673	0.46261	0.02791	5.3313	7.0813	0.497163	-0.1367	-0.1625	-0.0417	-0.0213	0.2003	-0.106	0.09765	0.08575	0.0009503	0.0018595	0.0042562	0.0059928
92	0.46	0.0218	0.155979	0.048855	0.70626	0.71709	0.46308	0.02828	5.3363	7.0896	0.497266	-0.133	-0.1595	-0.03935	-0.01955	0.2045	-0.1027	0.10015	0.08785	0.000954	0.001861	0.004258	0.005995
93	0.465	0.02202	0.156065	0.04895	0.70691	0.71747	0.46367	0.02859	5.3407	7.0956	0.497351	-0.1289	-0.1559	-0.0369	-0.0176	0.2084	-0.0981	0.1023	0.08985	0.0009582	0.0018626	0.0042598	0.0059969
94	0.47	0.0222	0.15616	0.04904	0.70758	0.71781	0.46426	0.02891	5.3458	7.1026	0.497455	-0.1245	-0.1532	-0.0342	-0.01585	0.2128	-0.0929	0.10425	0.0919	0.0009617	0.0018642	0.0042621	0.005999
95	0.475	0.0224	0.156241	0.04914	0.70831	0.71816	0.46484	0.02925	5.3505	7.1103	0.497548	-0.1209	-0.1504	-0.0311	-0.0138	0.2182	-0.0886	0.1066	0.09365	0.0009662	0.0018659	0.0042639	0.0060012
96	0.48	0.02266	0.156327	0.049245	0.70897	0.71855	0.4653	0.02961	5.3545	7.1173	0.497632	-0.1173	-0.1472	-0.02815	-0.0121	0.2229	-0.0841	0.1088	0.09555	0.0009711	0.0018677	0.0042658	0.0060035
97	0.485	0.02288	0.156414	0.049345	0.70965	0.71892	0.4659	0.02996	5.3585	7.1254	0.497717	-0.1135	-0.1443	-0.0253	-0.0102	0.2276	-0.0795	0.1111	0.0973	0.0009784	0.0018694	0.0042679	0.0060059
98	0.49	0.02307	0.156501	0.049445	0.71032	0.71932	0.46638	0.03031	5.3631	7.133	0.497808	-0.1092	-0.1415	-0.02275	-0.00815	0.2313	-0.0749	0.11315	0.0989	0.0009841	0.0018709	0.00427	0.0060077
99	0.495	0.0233	0.156605	0.049535	0.71107	0.71966	0.46693	0.03072	5.3673	7.1413	0.497903	-0.1052	-0.1388	-0.0202	-0.00605	0.2366	-0.0702	0.1149	0.10045	0.0009915	0.0018726	0.0042717	0.00601
100	0.5	0.02352	0.156699	0.04963	0.71182	0.72007	0.46745	0.03111	5.3725	7.1491	0.497992	-0.1014	-0.1359	-0.0176	-0.0041	0.2407	-0.0656	0.11685	0.1023	0.0009981	0.0018742	0.0042736	0.0060117
101	0.505	0.02375	0.156794	0.049745	0.71251	0.72042	0.46795	0.0315	5.3773	7.1565	0.498106	-0.0967	-0.1328	-0.01455	-0.00195	0.2448	-0.0614	0.11925	0.1039	0.0010054	0.0018766	0.0042756	0.0060137
102	0.51	0.02397	0.156893	0.04984	0.71315	0.72081	0.46851	0.03182	5.3818	7.1646	0.498214	-0.0924	-0.13	-0.0112	-5e-05	0.2487	-0.0576	0.12155	0.1055	0.0010122	0.0018789	0.0042773	0.0060157
103	0.515	0.0242	0.156991	0.04995	0.7138	0.72117	0.46909	0.03218	5.3858	7.1736	0.498306	-0.0887	-0.1268	-0.00865	0.00175	0.2528	-0.0531	0.12355	0.10675	0.0010206	0.0018807	0.0042792	0.0060177
104	0.52	0.02444	0.157084	0.050045	0.71467	0.72149	0.46959	0.0325	5.391	7.1811	0.4984	-0.0852	-0.1236	-0.0058	0.0038	0.2568	-0.0471	0.12525	0.1081	0.0010284	0.0018828	0.0042814	0.0060196
105	0.525	0.02465	0.157168	0.050145	0.71541	0.72189	0.47004	0.03282	5.3959	7.188	0.498488	-0.0817	-0.1209	-0.0033	0.00565	0.2613	-0.0417	0.12705	0.1099	0.0010363	0.0018851	0.0042836	0.0060214
106	0.53	0.02486	0.15726	0.050265	0.71613	0.72226	0.47058	0.03316	5.3999	7.1953	0.498585	-0.0771	-0.1179	-0.0012	0.0076	0.2646	-0.0357	0.1293	0.1116	0.0010458	0.0018873	0.0042861	0.0060235
107	0.535	0.02508	0.157342	0.05037	0.71683	0.7226	0.47117	0.03354	5.404	7.2029	0.498686	-0.0728	-0.1154	0.0015	0.0094	0.2686	-0.0284	0.1314	0.113	0.0010576	0.00189	0.0042884	0.0060258
108	0.54	0.0253	0.15743	0.05048	0.71749	0.72295	0.47179	0.03386	5.4096	7.2108	0.498792	-0.0687	-0.1129	0.0038	0.01115	0.2724	-0.0216	0.13365	0.11475	0.0010688	0.0018923	0.0042908	0.0060279
109	0.545	0.02554	0.157534	0.05057	0.71819	0.72326	0.47229	0.0342	5.4146	7.2196	0.498893	-0.0651	-0.1106	0.0064	0.01385	0.2761	-0.0168	0.13575	0.11625	0.0010775	0.0018952	0.0042928	0.0060298
110	0.55	0.02577	0.157633	0.050655	0.71902	0.72353	0.47281	0.0346	5.4191	7.2297	0.499001	-0.0609	-0.1078	0.00855	0.0158	0.2796	-0.0117	0.13825	0.1178	0.0010859	0.0018983	0.004295	0.0060318
111	0.555	0.02597	0.15776	0.05075	0.71983	0.72392	0.47332	0.03493	5.4232	7.2363	0.499098	-0.056	-0.1049	0.01105	0.01795	0.2832	-0.0057	0.14055	0.1195	0.0010928	0.0019015	0.0042975	0.0060339
112	0.56	0.0262	0.157859	0.050865	0.72047	0.72429	0.47385	0.0352	5.4284	7.2446	0.499203	-0.0521	-0.1023	0.01365	0.02035	0.2861	-0.0007	0.1424	0.1209	0.001099	0.0019052	0.0042997	0.006036
113	0.565	0.02641	0.157956	0.050985	0.72122	0.72463	0.47454	0.0356	5.4332	7.2515	0.499318	-0.0483	-0.0996	0.01645	0.02255	0.2901	0.0041	0.14455	0.12245	0.0011058	0.0019091	0.004302	0.006038
114	0.57	0.02664	0.158065	0.051085	0.72179	0.72495	0.47507	0.03596	5.4379	7.2589	0.49941	-0.0447	-0.0973	0.01925	0.0247	0.294	0.0101	0.14695	0.12395	0.0011106	0.0019132	0.0043051	0.0060405
115	0.575	0.02686	0.158187	0.0512	0.72252	0.72526	0.47565	0.03626	5.4427	7.2683	0.499506	-0.0403	-0.0946	0.02165	0.02665	0.2977	0.017	0.1493	0.1253	0.0011153	0.0019177	0.0043082	0.0060427
116	0.58	0.02708	0.158331	0.0513	0.72318	0.72565	0.47629	0.03659	5.4482	7.2757	0.499623	-0.036	-0.0917	0.0244	0.02935	0.3013	0.0245	0.1511	0.12675	0.0011204	0.0019229	0.0043126	0.0060446
117	0.585	0.02726	0.15846	0.051405	0.72393	0.72608	0.47688	0.03693	5.4533	7.2845	0.499712	-0.0321	-0.0884	0.0273	0.0317	0.3048	0.033	0.15345	0.1283	0.0011262	0.0019292	0.0043175	0.0060469
118	0.59	0.0275	0.158571	0.0515	0.72472	0.72645	0.47745	0.03733	5.458	7.2931	0.499815	-0.029	-0.0839	0.02995	0.03405	0.3082	0.0415	0.15545	0.1299	0.0011309	0.0019369	0.0043213	0.0060494
119	0.595	0.02773	0.158687	0.05161	0.72539	0.72686	0.47807	0.03759	5.4626	7.302	0.4999	-0.0257	-0.0792	0.0325	0.03665	0.3121	0.0479	0.15755	0.13125	0.001137	0.0019437	0.0043272	0.0060519
120	0.6	0.02798	0.158814	0.05171	0.72613	0.72724	0.47865	0.03788	5.467	7.3114	0.499978	-0.0227	-0.0747	0.03605	0.0389	0.3153	0.0529	0.15945	0.13305	0.0011424	0.0019515	0.0043321	0.006054
121	0.605	0.02821	0.158933	0.051825	0.72693	0.72769	0.47927	0.03824	5.4713	7.3203	0.500078	-0.0199	-0.0702	0.03885	0.04125	0.319	0.0582	0.16135	0.13465	0.001148	0.0019589	0.00434	0.0060561
122	0.61	0.02846	0.159054	0.051925	0.72766	0.72806	0.47996	0.03857	5.4759	7.3283	0.500182	-0.0158	-0.0662	0.04135	0.04375	0.323	0.0628	0.16315	0.13655	0.0011587	0.0019666	0.0043462	0.0060583
123	0.615	0.02872	0.15917	0.052045	0.72833	0.72846	0.48056	0.03895	5.4806	7.3386	0.500278	-0.0129	-0.0615	0.04375	0.0461	0.3259	0.0682	0.1649	0.13825	0.0011756	0.001981	0.0043539	0.0060607
124	0.62	0.029	0.159288	0.052135	0.72914	0.72888	0.48128	0.03926	5.4858	7.3479	0.500369	-0.009	-0.0578	0.0462	0.0483	0.3294	0.072	0.16695	0.1395	0.0011924	0.0019962	0.0043602	0.0060633
125	0.625	0.02923	0.159401	0.05224	0.73	0.72919	0.48193	0.03958	5.4906	7.3562	0.500433	-0.0052	-0.054	0.04875	0.05115	0.3326	0.075	0.16875	0.1409	0.0012429	0.0020194	0.0043681	0.006066
126	0.63	0.0295	0.159522	0.05236	0.7309	0.72959	0.48251	0.03993	5.496	7.3651	0.500529	-0.0016	-0.0501	0.05195	0.0534	0.3358	0.0784	0.1709	0.14225	0.0014901	0.0035986	0.0043777	0.0060685
127	0.635	0.02976	0.159644	0.052455	0.73172	0.73002	0.48316	0.04026	5.5009	7.3745	0.50063	0.0017	-0.045	0.0547	0.05565	0.3396	0.0826	0.1728	0.14365	0.001533	0.0036438	0.0043905	0.0060712
128	0.64	0.02997	0.159783	0.05256	0.73251	0.7304	0.48378	0.04062	5.5059	7.3845	0.500738	0.0048	-0.0412	0.0568	0.05735	0.343	0.088	0.17455	0.14515	0.0015609	0.0036696	0.0044091	0.006074
129	0.645	0.03026	0.159927	0.05267	0.73334	0.7308	0.48431	0.04096	5.5112	7.3927	0.500838	0.0082	-0.0369	0.0595	0.05985	0.3467	0.093	0.17675	0.1464	0.0015837	0.0037071	0.0044655	0.0060768
130	0.65	0.03048	0.160039	0.05277	0.73414	0.73124	0.48503	0.0413	5.5159	7.4019	0.500946	0.0115	-0.0334	0.06215	0.0621	0.3507	0.097	0.1791	0.1477	0.0016127	0.0037517	0.0045119	0.00608
131	0.655	0.03072	0.160178	0.052905	0.73481	0.73158	0.48564	0.04167	5.5206	7.4112	0.501026	0.015	-0.028	0.0647	0.0643	0.355	0.1028	0.1807	0.1492	0.0016455	0.0037801	0.0045667	0.006083
132	0.66	0.031	0.160307	0.053035	0.73559	0.73202	0.48622	0.04208	5.5255	7.4211	0.501144	0.0186	-0.0227	0.06715	0.0668	0.3587	0.1075	0.18285	0.15045	0.0016669	0.0038062	0.0045981	0.0060858
133	0.665	0.03128	0.160415	0.05315	0.73646	0.73237	0.48692	0.04243	5.5314	7.4303	0.501239	0.0237	-0.0182	0.07045	0.069	0.3621	0.1122	0.18515	0.1519	0.0016807	0.0038235	0.004615	0.0060884
134	0.67	0.03152	0.160552	0.05326	0.7374	0.73286	0.48761	0.04279	5.5355	7.4415	0.501346	0.0287	-0.0143	0.0733	0.07135	0.3651	0.1165	0.18675	0.153	0.0016906	0.0038419	0.0046263	0.0060913
135	0.675	0.03177	0.160709	0.05337	0.73833	0.73329	0.48825	0.04324	5.5405	7.4511	0.501458	0.0327	-0.0098	0.07555	0.07345	0.3687	0.1211	0.1886	0.15445	0.0017005	0.0038672	0.0046377	0.0060944
136	0.68	0.03207	0.160844	0.05347	0.7393	0.73366	0.48883	0.04358	5.5459	7.4609	0.501543	0.0363	-0.0049	0.0777	0.07555	0.3724	0.1248	0.19065	0.1558	0.0017074	0.0039513	0.0046502	0.0060972
137	0.685	0.03238	0.160956	0.053585	0.74018	0.7341	0.4895	0.04392	5.5504	7.4706	0.501666	0.0403	0.0011	0.0798	0.0774	0.3756	0.1285	0.1929	0.15715	0.0017135	0.0039966	0.0046598	0.0061004
138	0.69	0.03268	0.161081	0.05371	0.74112	0.73448	0.49015	0.04433	5.5547	7.482	0.501791	0.0447	0.0074	0.0824	0.07935	0.3798	0.1335	0.1947	0.15855	0.0017182	0.0040756	0.0046687	0.0061036
139	0.695	0.03295	0.161222	0.053825	0.74201	0.73493	0.49087	0.0447	5.5604	7.4926	0.501901	0.048	0.013	0.0847	0.08115	0.3836	0.1385	0.1964	0.15995	0.0017241	0.0041434	0.0046766	0.0061074
140	0.7	0.0333	0.161355	0.05395	0.74311	0.73532	0.49155	0.04508	5.5652	7.5033	0.502012	0.0515	0.0169	0.08675	0.08315	0.3872	0.1427	0.1984	0.16145	0.0017288	0.0041641	0.0046831	0.0061114
141	0.705	0.03355	0.161484	0.054055	0.74399	0.73573	0.49222	0.04553	5.5699	7.5139	0.502146	0.0555	0.02	0.0888	0.08545	0.3908	0.1459	0.2007	0.16285	0.0017331	0.0041775	0.004689	0.0061148
142	0.71	0.03384	0.16162	0.05417	0.74488	0.73616	0.49291	0.04592	5.5752	7.5254	0.502254	0.0595	0.0234	0.09075	0.08805	0.3948	0.1498	0.20335	0.1641	0.001738	0.0041866	0.0046951	0.0061194
143	0.715	0.0341	0.161776	0.054275	0.74561	0.73658	0.49366	0.04635	5.5816	7.5377	0.502373	0.0636	0.0273	0.0927	0.0907	0.3992	0.1545	0.20605	0.16535	0.0017425	0.0041937	0.0047015	0.0061233
144	0.72	0.03441	0.161932	0.054395	0.74636	0.737	0.49436	0.04676	5.5857	7.551	0.502514	0.0685	0.0307	0.09485	0.09325	0.4045	0.1585	0.2085	0.16675	0.0017468	0.0042006	0.0047073	0.0061274
145	0.725	0.0347	0.162076	0.054505	0.74714	0.73739	0.49491	0.04723	5.5911	7.563	0.502661	0.0744	0.0343	0.0969	0.0956	0.4086	0.1638	0.21105	0.1679	0.0017509	0.0042057	0.0047144	0.0061312
146	0.73	0.03497	0.162266	0.05462	0.74804	0.73776	0.49562	0.04769	5.5969	7.5746	0.502782	0.0787	0.0373	0.0989	0.0978	0.4124	0.1676	0.2138	0.1692	0.001755	0.0042104	0.0047194	0.006135
147	0.735	0.03527	0.162455	0.054775	0.74886	0.73824	0.49634	0.04806	5.602	7.5882	0.50294	0.0825	0.0405	0.1012	0.0994	0.4169	0.1713	0.21665	0.1704	0.0017591	0.0042144	0.0047235	0.0061388
148	0.74	0.03556	0.162633	0.054895	0.74962	0.73861	0.49712	0.04851	5.608	7.6022	0.503069	0.0866	0.0439	0.1036	0.10155	0.422	0.175	0.2185	0.17165	0.0017636	0.0042193	0.0047298	0.0061427
149	0.745	0.03584	0.162817	0.055015	0.75045	0.73909	0.49773	0.0489	5.6136	7.6148	0.503189	0.0913	0.0474	0.10585	0.104	0.4267	0.1778	0.2208	0.17295	0.0017684	0.0042234	0.0047345	0.0061476
150	0.75	0.0361	0.162987	0.05515	0.75147	0.73965	0.49838	0.04937	5.6196	7.629	0.50335	0.0966	0.0505	0.1076	0.106	0.4318	0.182	0.22325	0.17425	0.0017726	0.0042273	0.0047396	0.0061523
151	0.755	0.03638	0.163144	0.05528	0.75229	0.74018	0.4991	0.04978	5.6259	7.6412	0.503521	0.1014	0.054	0.1101	0.1084	0.4363	0.1855	0.22545	0.1757	0.0017773	0.0042307	0.0047434	0.0061562
152	0.76	0.03668	0.163298	0.055425	0.75333	0.74061	0.49996	0.05017	5.6326	7.6543	0.503663	0.1065	0.0573	0.1129	0.1108	0.4404	0.1898	0.2284	0.1769	0.0017831	0.0042347	0.004748	0.0061612
153	0.765	0.03699	0.16344	0.05556	0.75421	0.74105	0.50075	0.05059	5.6383	7.6654	0.5038	0.1123	0.0604	0.11555	0.113	0.4445	0.1926	0.23125	0.17845	0.0017882	0.004238	0.0047546	0.0061675
154	0.77	0.03734	0.163592	0.055715	0.75519	0.74147	0.50146	0.05109	5.645	7.6753	0.503923	0.1185	0.0635	0.1179	0.11535	0.4483	0.1963	0.2335	0.1799	0.0017954	0.0042412	0.0047599	0.0061734
155	0.775	0.03765	0.16376	0.055855	0.75641	0.74186	0.50216	0.05163	5.6514	7.6875	0.50409	0.124	0.0663	0.1203	0.11725	0.4515	0.1999	0.2359	0.18145	0.0018016	0.0042446	0.0047661	0.006178
156	0.78	0.03798	0.163931	0.056015	0.75738	0.74232	0.50309	0.05208	5.6587	7.6983	0.504256	0.1293	0.0701	0.12245	0.119	0.4559	0.203	0.2381	0.1831	0.0018073	0.0042473	0.0047723	0.006183
157	0.785	0.03835	0.164105	0.056195	0.75829	0.74292	0.50399	0.05267	5.6649	7.709	0.504397	0.1355	0.0735	0.1249	0.12105	0.4594	0.2056	0.2405	0.1846	0.0018123	0.0042502	0.0047789	0.0061892
158	0.79	0.03872	0.164258	0.056355	0.75922	0.74342	0.50478	0.05325	5.6713	7.722	0.504551	0.1424	0.0769	0.1271	0.1232	0.463	0.2077	0.24315	0.18625	0.0018178	0.0042529	0.0047836	0.0061952
159	0.795	0.03901	0.164394	0.0565	0.76006	0.7439	0.50566	0.05381	5.6782	7.7343	0.504672	0.1479	0.0806	0.12915	0.12535	0.4669	0.2109	0.24635	0.18785	0.0018231	0.0042547	0.0047887	0.0062019
160	0.8	0.0394	0.164544	0.05665	0.76112	0.74436	0.50646	0.05441	5.6838	7.7442	0.504837	0.1528	0.085	0.1316	0.12735	0.4709	0.2142	0.24945	0.1893	0.0018299	0.0042571	0.0047938	0.0062103
161	0.805	0.03973	0.164674	0.05681	0.76199	0.74488	0.50727	0.05498	5.6921	7.7553	0.504991	0.1577	0.0892	0.1342	0.1295	0.475	0.2169	0.2526	0.19095	0.0018339	0.0042599	0.0047986	0.0062179
162	0.81	0.04016	0.164811	0.056955	0.76296	0.74537	0.50822	0.05552	5.6988	7.7691	0.505141	0.1615	0.0935	0.13735	0.1318	0.4787	0.2201	0.25545	0.1924	0.0018388	0.0042629	0.0048043	0.0062262
163	0.815	0.04056	0.164985	0.05714	0.7641	0.74583	0.5092	0.05604	5.7065	7.7809	0.505289	0.1664	0.0974	0.14	0.1339	0.4819	0.2234	0.2582	0.19405	0.0018444	0.0042655	0.0048099	0.0062356
164	0.82	0.04088	0.16516	0.057305	0.76522	0.74638	0.51014	0.05661	5.7127	7.7919	0.505436	0.1711	0.1015	0.1428	0.1359	0.4852	0.2264	0.2606	0.19565	0.0018493	0.004268	0.0048155	0.0062461
165	0.825	0.04128	0.165301	0.057495	0.76651	0.74685	0.51102	0.05736	5.719	7.8057	0.505572	0.1773	0.1048	0.14535	0.138	0.4887	0.229	0.26345	0.19765	0.0018541	0.0042706	0.004823	0.0062571
166	0.83	0.04169	0.165471	0.05767	0.76763	0.74736	0.51196	0.05788	5.7257	7.8204	0.505742	0.1833	0.1088	0.14735	0.1404	0.4932	0.2317	0.26655	0.19935	0.001861	0.0042731	0.0048296	0.0062688
167	0.835	0.04212	0.165631	0.05785	0.76882	0.74786	0.51296	0.05853	5.7333	7.8321	0.505898	0.1892	0.1129	0.1499	0.1428	0.4979	0.2344	0.26925	0.2011	0.0018656	0.004275	0.004837	0.0062821
168	0.84	0.04255	0.165793	0.05808	0.7701	0.74839	0.51401	0.05909	5.7404	7.8438	0.506042	0.195	0.117	0.15245	0.14505	0.5017	0.2374	0.2718	0.2029	0.0018714	0.0042773	0.004849	0.0062988
169	0.845	0.04301	0.165925	0.05825	0.77119	0.74887	0.51489	0.05988	5.7484	7.8567	0.506185	0.2002	0.1224	0.15515	0.1472	0.5057	0.24	0.2741	0.20455	0.0018778	0.0042792	0.0048659	0.0063128
170	0.85	0.04343	0.166061	0.058425	0.77245	0.74935	0.51584	0.06044	5.7573	7.8719	0.506351	0.2064	0.1268	0.1581	0.149	0.5106	0.2437	0.277	0.2061	0.0018833	0.0042817	0.004894	0.0063265
171	0.855	0.04385	0.166227	0.058585	0.77373	0.74998	0.51699	0.06099	5.7678	7.8874	0.506511	0.2114	0.131	0.16055	0.15115	0.5148	0.2469	0.28005	0.2078	0.0018889	0.0042837	0.0049952	0.0063442
172	0.86	0.04433	0.16642	0.05875	0.77504	0.75051	0.51792	0.06173	5.776	7.9016	0.506678	0.2172	0.135	0.16265	0.1534	0.5189	0.25	0.2826	0.2098	0.0018951	0.0042858	0.0051347	0.0063581
173	0.865	0.04485	0.166601	0.05897	0.77652	0.7511	0.51906	0.06233	5.784	7.9177	0.506873	0.2245	0.1393	0.1651	0.1561	0.5229	0.2533	0.28545	0.21235	0.0019009	0.0042877	0.0051756	0.0063704
174	0.87	0.04539	0.166806	0.05916	0.77795	0.75169	0.5201	0.06295	5.7919	7.9353	0.507031	0.2314	0.143	0.168	0.1586	0.526	0.2562	0.2887	0.21465	0.0019073	0.0042895	0.0051987	0.0063806
175	0.875	0.04601	0.167023	0.059385	0.77912	0.75241	0.52111	0.06359	5.8012	7.9543	0.5072	0.238	0.1474	0.171	0.16125	0.5301	0.2598	0.29175	0.21705	0.0019151	0.0042913	0.0052208	0.0063996
176	0.88	0.04652	0.167236	0.05959	0.78051	0.75306	0.52228	0.06417	5.8114	7.9745	0.50742	0.2429	0.152	0.1736	0.1638	0.5347	0.2648	0.29425	0.2194	0.0019233	0.0042934	0.0052482	0.0064152
177	0.885	0.04711	0.167451	0.059815	0.78173	0.75385	0.52347	0.06509	5.8198	7.9923	0.507643	0.2509	0.1568	0.17725	0.1665	0.5393	0.2694	0.29715	0.22135	0.0019387	0.0042958	0.0052716	0.006431
178	0.89	0.0476	0.167671	0.06004	0.78307	0.75454	0.52441	0.06579	5.8312	8.0096	0.507839	0.2594	0.161	0.18035	0.16945	0.5446	0.2738	0.30075	0.22335	0.001954	0.0042976	0.0052928	0.0064448
179	0.895	0.04813	0.167909	0.06028	0.78452	0.7552	0.52556	0.06662	5.8412	8.0271	0.508024	0.2668	0.164	0.1833	0.17225	0.5499	0.2784	0.30365	0.2257	0.0019744	0.0042998	0.005311	0.0064634
180	0.9	0.04869	0.168174	0.060545	0.78625	0.75579	0.52712	0.06759	5.8541	8.043	0.508268	0.2734	0.1688	0.1866	0.1752	0.5547	0.2826	0.30675	0.22795	0.0020011	0.0043016	0.0053371	0.0064907
181	0.905	0.04921	0.1684	0.060825	0.78831	0.7565	0.52828	0.06859	5.8641	8.0635	0.508543	0.2831	0.174	0.1908	0.1784	0.5596	0.2866	0.30955	0.2303	0.00223	0.0043039	0.0053562	0.0065399
182	0.91	0.04984	0.168649	0.06107	0.79003	0.75724	0.5298	0.06963	5.8764	8.0813	0.508809	0.2929	0.1779	0.19485	0.1814	0.5646	0.2908	0.31255	0.2332	0.0023328	0.0043066	0.0053811	0.0067464
183	0.915	0.05044	0.168843	0.061385	0.79188	0.75795	0.53148	0.0706	5.8893	8.0993	0.509043	0.3001	0.1822	0.19785	0.18435	0.5714	0.2947	0.31585	0.23665	0.0023682	0.0043087	0.0054064	0.0068855
184	0.92	0.0511	0.169069	0.06169	0.7937	0.7587	0.53303	0.07152	5.9027	8.1231	0.509296	0.3102	0.1868	0.2018	0.1869	0.5777	0.2984	0.31835	0.2392	0.0023886	0.0043114	0.005443	0.0069212
185	0.925	0.05183	0.169352	0.062045	0.796	0.75968	0.53485	0.07244	5.9152	8.1472	0.509589	0.3279	0.1908	0.2062	0.1904	0.5842	0.301	0.3213	0.24295	0.0024053	0.0043149	0.0055109	0.0069421
186	0.93	0.05266	0.169603	0.06243	0.79853	0.7605	0.53643	0.07333	5.9305	8.173	0.50989	0.3515	0.196	0.2106	0.19395	0.5924	0.3048	0.3243	0.2466	0.0024192	0.0043175	0.0055751	0.0069577
187	0.935	0.05349	0.169985	0.06272	0.80107	0.76137	0.53821	0.07431	5.9465	8.2035	0.510218	0.3675	0.2016	0.2146	0.1979	0.5985	0.309	0.32735	0.2503	0.0024332	0.0043206	0.0056304	0.0069704
188	0.94	0.05425	0.170292	0.062985	0.80345	0.76234	0.54007	0.07535	5.9617	8.2375	0.510477	0.3858	0.207	0.2185	0.2019	0.606	0.3132	0.33105	0.25385	0.0024475	0.0043236	0.0056699	0.0069821
189	0.945	0.05514	0.170628	0.063375	0.80631	0.76324	0.54244	0.07625	5.9788	8.271	0.510871	0.3992	0.2123	0.2225	0.2064	0.6135	0.3191	0.3351	0.25755	0.0024597	0.0043273	0.0056955	0.0069965
190	0.95	0.05593	0.170999	0.063745	0.80961	0.76443	0.54531	0.07718	6.0014	8.3133	0.511194	0.4235	0.2171	0.2297	0.21015	0.6216	0.3272	0.33865	0.26075	0.0024747	0.0043302	0.0057202	0.0070103
191	0.955	0.05712	0.171342	0.064195	0.81274	0.76555	0.54782	0.07824	6.0228	8.3484	0.511587	0.4501	0.2239	0.2408	0.2151	0.6276	0.3344	0.34455	0.26525	0.0024873	0.0043344	0.0057398	0.0070223
192	0.96	0.05818	0.171711	0.064695	0.81589	0.76701	0.55055	0.07938	6.0434	8.4056	0.512021	0.4616	0.234	0.24875	0.221	0.6367	0.3403	0.35085	0.2703	0.0024998	0.0043377	0.005765	0.0070365
193	0.965	0.05966	0.172209	0.065155	0.82	0.76826	0.55384	0.08054	6.0683	8.4689	0.512349	0.4731	0.2426	0.25645	0.2281	0.6455	0.3476	0.3568	0.27565	0.002516	0.0043418	0.0057856	0.0070575
194	0.97	0.06152	0.172943	0.06574	0.82443	0.76972	0.55731	0.08217	6.0952	8.5435	0.512758	0.4816	0.2527	0.26385	0.23675	0.6574	0.3548	0.36435	0.2803	0.0025313	0.0043465	0.0058038	0.0070737
195	0.975	0.06396	0.173633	0.06636	0.82965	0.77199	0.56148	0.08387	6.1349	8.6386	0.513316	0.493	0.265	0.27365	0.2466	0.6715	0.3627	0.3733	0.2872	0.0025448	0.0043523	0.0058255	0.0070939
196	0.98	0.06629	0.174905	0.06713	0.83761	0.77423	0.56605	0.08602	6.1754	8.7607	0.513908	0.5111	0.2823	0.2823	0.255	0.6854	0.3742	0.38145	0.29445	0.0025641	0.0043577	0.0058434	0.0071119
197	0.985	0.06928	0.175676	0.06825	0.84592	0.7766	0.57266	0.08811	6.2276	9.0381	0.514578	0.5336	0.2962	0.29535	0.26575	0.7051	0.385	0.3953	0.30195	0.0025819	0.0043642	0.0058649	0.0071364
198	0.99	0.07351	0.176596	0.069595	0.85768	0.77947	0.57898	0.09095	6.2984	9.3324	0.515956	0.5574	0.3164	0.3088	0.28245	0.7338	0.3977	0.4097	0.31705	0.0025933	0.0043731	0.0059123	0.0071734
199	0.995	0.07849	0.177997	0.072015	0.87243	0.785	0.58844	0.09526	6.4024	9.7258	0.517665	0.6208	0.3377	0.33575	0.30345	0.7543	0.425	0.43025	0.3439	0.0026107	0.0043889	0.0059505	0.0072796
200	1	0	0	0	0	0	0	0	0	0	0	0	0	0	0	0	0	0	0	0	0	0	0
201	1.005	0	0	0	0	0	0	0	0	0	0	0	0	0	0	0	0	0	0	0	0	0	0
