# Supplementary material for: Time-varying asymmetry and tail thickness in long series of daily financial returns
Source: publisher site journal article supplement (doi:10.1515/snde-2017-0071), 2018-10-02
Supplement: Supplementary file 111 [file point_est.xlsx]

## Sheet: 1
	log post kernel	delta	rho	alpha0	fi1	beta1	d	lambda1	ni1	ni2	a00	gamma_s0	gamma_s1	gamma_s2	gamma_s3	gamma_c0	gamma_c1	gamma_c2	gamma_c3	phi0	phi1	phi2	phi3	Var24	Var25	Var26	Var27	Var28	Var29	Var30	Var31	Var32	Var33	Var34	Var35	Var36	Var37	Var38	Var39	Var40	Var41	Var42	Var43	Var44	Var45	(a1+a2)/2+b1	a0/[1-(a1+a2)/2-b1]	[a0/(1-(a1+a2)/2-b1)]^0.5	ni2/ni1
1	-16640.8	0.0266118	0.317335	-2.89738	0.731284	1.74256	-0.229404	0.0264564	1.2095	1.59348	-0.00279354	0.0171354	-0.363428	0.040703	-0.281378	0.517122	-0.220173	0.209102	-0.0239445	-4.20339	-3.14313	-2.90505	-3.40578	0.0266118	0.157349	0.0551675	0.731284	0.702025	0.442899	0.0264564	5.35282	6.92184	0.499111	0.0171354	-0.363428	0.040703	-0.281378	0.517122	-0.220173	0.209102	-0.0239445	0.000921374	0.00183991	0.00300536	0.00371173	0.0910482	0.0321961	0.0434346	0.0490042
2	-16637	0.0226838	0.317381	-2.94949	0.749743	1.73247	-0.277853	0.0323634	1.22212	1.61641	-0.00248276	0.0705776	-0.242179	0.236652	-0.118164	0.497029	-0.29262	0.196403	0.197252	-4.15681	-3.09773	-2.10049	-4.09832	0.0226838	0.157372	0.0523664	0.749743	0.699456	0.43098	0.0323634	5.39538	7.03599	0.49921	0.0705776	-0.242179	0.236652	-0.118164	0.497029	-0.29262	0.196403	0.197252	0.000921601	0.00183971	0.00432851	0.00466606	0.0897695	0.0310113	0.0418938	0.0475164
3	-16665.1	0.0242266	0.316966	-3.0078	0.711071	1.81887	-0.117659	0.0300319	1.21427	1.63982	-0.00587258	-0.0994327	-0.11912	-0.0400576	-0.00253147	0.184077	-0.0413677	0.110643	0.0792489	-3.75493	-2.70043	-2.64729	-2.70585	0.0242266	0.157169	0.0494001	0.711071	0.72086	0.470619	0.0300319	5.36884	7.15526	0.498131	-0.0994327	-0.11912	-0.0400576	-0.00253147	0.184077	-0.0413677	0.110643	0.0792489	0.00106807	0.00240241	0.00380958	0.00513672	0.0910347	0.0295808	0.0423156	0.0489878
[truncated: 5 more columns]
