# Supplementary material for: Time-varying asymmetry and tail thickness in long series of daily financial returns
Source: publisher site journal article supplement (doi:10.1515/snde-2017-0071), 2018-10-02
Supplement: Supplementary file 113 [file post_es.xlsx]

## Sheet: 1
	delta	rho	alpha0	fi1	beta1	d	lambda1	ni1	ni2	a00	gamma_s0	gamma_s1	gamma_s2	gamma_s3	gamma_c0	gamma_c1	gamma_c2	gamma_c3	phi0	phi1	phi2	phi3	(a1+a2)/2+b1	a0/[1-(a1+a2)/2-b1]	[a0/(1-(a1+a2)/2-b1)]^0.5	ni2/ni1	Var27	per_1	per_2	per_3	per_4
1	0.0242266	0.157158	0.0500365	0.711071	0.719694	0.470795	0.0300319	5.38773	7.19881	0.498132	-0.0994327	-0.11912	-0.0400576	-0.00253147	0.184077	-0.0413677	0.110643	0.0792489	0.00128435	0.00270805	0.00434585	0.00588054	0.0920997	0.0302226	0.0425118	0.0488721	0.0496685	23.1716	10.8494	5.89213	4.33957
2	0.0187232	0.00820389	0.0079546	0.060662	0.0278718	0.04219	0.0290167	0.358516	0.681814	0.0077813	0.295552	0.208964	0.185541	0.137945	0.304413	0.241113	0.149553	0.127309	0.000570762	0.00115363	0.000658523	0.000730235	0.0113501	0.00566277	0.005155	0.00430035	0.00348947	8.71627	3.78277	0.8919	0.679811
