# Supplementary material for: Time-varying asymmetry and tail thickness in long series of daily financial returns
Source: publisher site journal article supplement (doi:10.1515/snde-2017-0071), 2018-10-02
Supplement: Supplementary file 141 [file acc_summary.xlsx]

## Sheet: 1
	Var1	Var2
1	0.143302	0.752038
2	0.12055	0.752038
3	0.131536	0.752038
4	0.041218	0.752038
5	0.142252	0.752038
6	0.120873	0.752038
7	0.148383	0.752038
8	0.151885	0.752038
