# Supplementary material for: Time-varying asymmetry and tail thickness in long series of daily financial returns
Source: publisher site journal article supplement (doi:10.1515/snde-2017-0071), 2018-10-02
Supplement: Supplementary file 143 [file add_par_res.xlsx]

## Sheet: 1
	(a1+a2)/2+b1	a0/[1-(a1+a2)/2-b1]	[a0/(1-(a1+a2)/2-b1)]^0.5	alpha1/alpha2
1	0.992764	0.783851	0.877425	5.26906
2	0.00200701	0.510123	0.117992	1.05868
