# Supplementary material for: Time-varying asymmetry and tail thickness in long series of daily financial returns
Source: publisher site journal article supplement (doi:10.1515/snde-2017-0071), 2018-10-02
Supplement: Supplementary file 145 [file cvm1.xlsx]

## Sheet: 1
	Var1	Var2	Var3	Var4	Var5	Var6	Var7	Var8	Var9
1	0.000329845	-2.85346e-05	-0.00105537	-6.97733e-05	0.000243353	9.00877e-05	-0.000484494	-4.35061e-05	5.00329e-05
2	-2.85346e-05	0.000257812	0.000161446	0.000122469	-7.86868e-05	-0.000133004	3.64773e-05	5.20578e-06	1.39229e-05
3	-0.00105537	0.000161446	0.0263347	0.00656796	-0.00922738	0.00368042	0.00154536	-0.00035405	0.00309425
4	-6.97733e-05	0.000122469	0.00656796	0.00641428	-0.00523802	0.00345229	4.4334e-05	-0.00069623	0.00256691
5	0.000243353	-7.86868e-05	-0.00922738	-0.00523802	0.00605222	-0.00794292	-0.00039618	-0.000191316	-0.00300229
6	9.00877e-05	-0.000133004	0.00368042	0.00345229	-0.00794292	0.0389668	-1.90347e-05	-3.99122e-05	0.00512158
7	-0.000484494	3.64773e-05	0.00154536	4.4334e-05	-0.00039618	-1.90347e-05	0.000790522	6.48711e-05	-7.31906e-05
8	-4.35061e-05	5.20578e-06	-0.00035405	-0.00069623	-0.000191316	-3.99122e-05	6.48711e-05	0.00527044	0.000189228
9	5.00329e-05	1.39229e-05	0.00309425	0.00256691	-0.00300229	0.00512158	-7.31906e-05	0.000189228	0.343192
