# Supplementary material for: Time-varying asymmetry and tail thickness in long series of daily financial returns
Source: publisher site journal article supplement (doi:10.1515/snde-2017-0071), 2018-10-02
Supplement: Supplementary file 149 [file cvm_ip.xlsx]

## Sheet: 1
	delta	rho	alpha0	alpha1-	beta1	alpha1+	lambda1	ni1=ni2	h0
1	0.000329845	-1.38823e-05	-5.53942e-06	-6.13819e-06	1.49202e-05	1.6192e-06	-0.000484494	-0.000189667	1.32164e-05
2	-1.38823e-05	6.10575e-05	4.19191e-07	5.26973e-06	-2.36379e-06	-1.16399e-06	1.7745e-05	1.15732e-05	8.96813e-06
3	-5.53942e-06	4.19191e-07	7.30177e-07	3.08748e-06	-3.00936e-06	3.82109e-07	8.11117e-06	-8.37241e-06	1.24071e-05
4	-6.13819e-06	5.26973e-06	3.08748e-06	5.03774e-05	-2.86145e-05	5.82091e-06	3.87195e-06	-0.000262044	0.000147415
5	1.49202e-05	-2.36379e-06	-3.00936e-06	-2.86145e-05	2.30072e-05	-9.19953e-06	-2.43018e-05	-4.74479e-05	-0.000120522
6	1.6192e-06	-1.16399e-06	3.82109e-07	5.82091e-06	-9.19953e-06	1.33204e-05	-3.0275e-07	-6.46276e-06	6.42902e-05
7	-0.000484494	1.7745e-05	8.11117e-06	3.87195e-06	-2.43018e-05	-3.0275e-07	0.000790522	0.00028248	-1.8484e-05
8	-0.000189667	1.15732e-05	-8.37241e-06	-0.000262044	-4.74479e-05	-6.46276e-06	0.00028248	0.0940918	-0.00033982
9	1.32164e-05	8.96813e-06	1.24071e-05	0.000147415	-0.000120522	6.42902e-05	-1.8484e-05	-0.00033982	0.109645
