# Supplementary material for: Time-varying asymmetry and tail thickness in long series of daily financial returns
Source: publisher site journal article supplement (doi:10.1515/snde-2017-0071), 2018-10-02
Supplement: Supplementary file 153 [file drawcvm0.xlsx]

## Sheet: 1
	Var1	Var2	Var3	Var4	Var5	Var6	Var7	Var8	Var9	Var10	Var11
1	0.000407248	-5.26496e-05	-0.000995358	3.2949e-05	0.000166253	0.000515751	-0.000586393	-1.91401e-05	-0.000103824	2.7169e-05	-0.000625099
2	-5.26496e-05	0.000286748	0.000266562	0.000170305	-0.000124675	-0.0002457	6.99131e-05	3.95886e-05	-5.85169e-05	-3.56198e-05	0.000176058
3	-0.000995358	0.000266562	0.023406	0.0071255	-0.00988666	0.00619772	0.00137643	0.000195019	-0.00105203	7.84633e-05	0.00281758
4	3.2949e-05	0.000170305	0.0071255	0.00738147	-0.00616044	0.00611152	-0.000148759	-0.000908054	-0.000766887	3.54858e-05	0.00449959
5	0.000166253	-0.000124675	-0.00988666	-0.00616044	0.0072144	-0.0123453	-0.000265095	-0.000457127	0.000412871	-5.6395e-05	-0.00509192
6	0.000515751	-0.0002457	0.00619772	0.00611152	-0.0123453	0.0723445	-0.000602972	0.000693319	-0.00148229	0.000208873	0.00330117
7	-0.000586393	6.99131e-05	0.00137643	-0.000148759	-0.000265095	-0.000602972	0.000930222	0.000122813	5.35582e-05	-7.72516e-05	0.00118987
8	-1.91401e-05	3.95886e-05	0.000195019	-0.000908054	-0.000457127	0.000693319	0.000122813	0.0111215	-0.0026733	0.0015272	0.00207012
9	-0.000103824	-5.85169e-05	-0.00105203	-0.000766887	0.000412871	-0.00148229	5.35582e-05	-0.0026733	0.0166754	-0.00184302	-0.00776496
10	2.7169e-05	-3.56198e-05	7.84633e-05	3.54858e-05	-5.6395e-05	0.000208873	-7.72516e-05	0.0015272	-0.00184302	0.000648385	0.000684904
11	-0.000625099	0.000176058	0.00281758	0.00449959	-0.00509192	0.00330117	0.00118987	0.00207012	-0.00776496	0.000684904	0.469508
