# Supplementary material for: Time-varying asymmetry and tail thickness in long series of daily financial returns
Source: publisher site journal article supplement (doi:10.1515/snde-2017-0071), 2018-10-02
Supplement: Supplementary file 155 [file drawcvm1.xlsx]

## Sheet: 1
	Var1	Var2	Var3
1	0.1	4.50535e-06	-0.00622848
2	4.50535e-06	0.1	-0.00165462
3	-0.00622848	-0.00165462	4.19938
