# Supplementary material for: Time-varying asymmetry and tail thickness in long series of daily financial returns
Source: publisher site journal article supplement (doi:10.1515/snde-2017-0071), 2018-10-02
Supplement: Supplementary file 161 [file l_1.xlsx]

## Sheet: 1
	Var1	Var2	Var3	Var4	Var5	Var6	Var7	Var8	Var9	Var10	Var11	Var12	Var13	Var14	Var15	Var16	Var17	Var18	Var19	Var20	Var21	Var22	Var23	Var24	Var25
1	5.48465e-05	8.34087e-05	0.000312242	0.000447091	0.000349062	0.000132187	0.000555467	0.000617916	0.00205914	0.00949343	0.0261069	0.00696185	0.00407523	0.0208855	0.00580154	0.0250627	0.0250627	0.0348092	0.0130535	0.00949343	0.0250627	0.0250627	0.0174046	0.0313283	0.0149182
2	0.1941	0.3519	0.4446	0.49105	0.52535	0.5828	0.6317	0.64955	0.66155	0.66565	0.6664	0.66735	0.67015	0.67245	0.6736	0.67475	0.67525	0.67565	0.6762	0.67715	0.67795	0.67845	0.679	0.6796	0.68025
3	5	5	9	7	6	5	5	5	7	5	5	5	8	5	5	6	6	5	5	5	6	6	5	9	5
4	0.0989	0.2893	0.4145	0.4747	0.5074	0.5433	0.6223	0.6411	0.658	0.6651	0.6662	0.6666	0.6681	0.6722	0.6727	0.6745	0.675	0.6755	0.6758	0.6766	0.6777	0.6782	0.6787	0.6793	0.6799
