# Supplementary material for: Time-varying asymmetry and tail thickness in long series of daily financial returns
Source: publisher site journal article supplement (doi:10.1515/snde-2017-0071), 2018-10-02
Supplement: Supplementary file 163 [file l_2.xlsx]

## Sheet: 1
	Var1	Var2	Var3	Var4	Var5	Var6	Var7	Var8	Var9	Var10	Var11	Var12	Var13	Var14	Var15	Var16	Var17	Var18	Var19	Var20	Var21	Var22	Var23	Var24	Var25
1	0.00494402	0.0093227	0.0161574	0.0876758	0.0367664	0.0161793	0.0102354	0.0198321	0.0110557	0.0410246	0.0468833	0.116689	0.0138893	0.0381773	0.106685	0.0174645	0.0567822	0.0158409	0.0302312	0.0391238	0.0294838	0.0211131	0.0544681	0.0212669	0.0401379
2	-0.0740504	-0.0730679	-0.0721847	-0.071802	-0.0716004	-0.0711357	-0.0703028	-0.0695294	-0.0687938	-0.0681943	-0.0679556	-0.0677995	-0.0673788	-0.0668661	-0.0666804	-0.0663325	-0.0659416	-0.06552	-0.0650177	-0.0647115	-0.064401	-0.0639766	-0.0636334	-0.063292	-0.0629164
3	2	5	5	5	5	5	5	5	5	5	5	5	5	5	5	5	5	5	5	5	5	5	5	5	5
4	-0.0744729	-0.073628	-0.0725078	-0.0718615	-0.0717424	-0.0714584	-0.0708129	-0.0697927	-0.0692661	-0.0683216	-0.068067	-0.0678443	-0.0677548	-0.0670029	-0.0667294	-0.0666315	-0.0660336	-0.0658496	-0.0651904	-0.064845	-0.0645781	-0.0642239	-0.0637293	-0.0635376	-0.0630465
