# Supplementary material for: Time-varying asymmetry and tail thickness in long series of daily financial returns
Source: publisher site journal article supplement (doi:10.1515/snde-2017-0071), 2018-10-02
Supplement: Supplementary file 171 [file mq.xlsx]

## Sheet: 1
	quantile	delta	rho	alpha0	alpha1-	beta1	alpha1+	lambda1	ni1=ni2	h0
1	0.005	-0.0302	0.143045	0.003299	0.081188	0.921024	0.01073	-0.03711	5.4887	0.0901
2	0.01	-0.02558	0.14493	0.003502	0.082661	0.922332	0.011465	-0.03072	5.5546	0.1081
3	0.015	-0.02263	0.146035	0.003621	0.083677	0.923143	0.011941	-0.02629	5.5944	0.1214
4	0.02	-0.02029	0.146895	0.003703	0.084405	0.923736	0.01229	-0.02285	5.6252	0.1319
5	0.025	-0.01854	0.14762	0.003769	0.085028	0.924236	0.012558	-0.02015	5.6503	0.1412
6	0.03	-0.01713	0.14824	0.0038265	0.085517	0.924631	0.012798	-0.01797	5.6711	0.1491
7	0.035	-0.01586	0.1488	0.0038785	0.085947	0.924973	0.01301	-0.016	5.6901	0.1565
8	0.04	-0.01476	0.14929	0.003924	0.086323	0.925285	0.013198	-0.01434	5.7076	0.163
9	0.045	-0.01377	0.14973	0.003963	0.086676	0.925562	0.013372	-0.01285	5.7224	0.1694
10	0.05	-0.01281	0.15011	0.003998	0.086996	0.925826	0.013525	-0.01149	5.7365	0.1753
11	0.055	-0.01197	0.150495	0.0040315	0.087276	0.926061	0.013677	-0.01025	5.7497	0.1814
12	0.06	-0.01118	0.150855	0.0040615	0.087552	0.926296	0.013824	-0.00906	5.7612	0.1867
13	0.065	-0.01044	0.151175	0.0040905	0.087823	0.926507	0.013948	-0.00799	5.7721	0.1918
14	0.07	-0.00973	0.15149	0.004118	0.088063	0.926728	0.014067	-0.00699	5.7826	0.1967
15	0.075	-0.00905	0.15177	0.004145	0.088289	0.926929	0.014182	-0.00603	5.792	0.2019
16	0.08	-0.00842	0.152035	0.0041685	0.088501	0.927118	0.014292	-0.00512	5.8014	0.2066
17	0.085	-0.00781	0.15229	0.0041915	0.088701	0.927289	0.014397	-0.00421	5.8107	0.2113
18	0.09	-0.00723	0.152545	0.0042155	0.088896	0.927452	0.014498	-0.00331	5.8199	0.2159
19	0.095	-0.00668	0.15279	0.004238	0.089086	0.927616	0.014596	-0.00251	5.8285	0.2203
20	0.1	-0.00613	0.15301	0.004259	0.089266	0.927772	0.014692	-0.00171	5.8364	0.2246
21	0.105	-0.00564	0.153245	0.004281	0.089446	0.927918	0.014787	-0.00097	5.8444	0.2289
22	0.11	-0.00513	0.153455	0.004302	0.089616	0.92806	0.014878	-0.00023	5.8521	0.2329
23	0.115	-0.00464	0.15367	0.0043215	0.089789	0.928188	0.014967	0.00051	5.8596	0.2369
24	0.12	-0.00417	0.15386	0.004341	0.089952	0.928319	0.015057	0.00119	5.8665	0.2408
25	0.125	-0.00371	0.15405	0.0043595	0.090115	0.928448	0.015137	0.00185	5.8737	0.2448
26	0.13	-0.00326	0.154245	0.004378	0.090272	0.928569	0.01522	0.00254	5.8805	0.249
27	0.135	-0.00285	0.154425	0.0043955	0.090423	0.928689	0.015301	0.00318	5.8873	0.2529
28	0.14	-0.00243	0.1546	0.0044125	0.090573	0.928801	0.015378	0.00378	5.8936	0.2567
29	0.145	-0.00205	0.154775	0.0044305	0.090717	0.928915	0.015455	0.00441	5.9003	0.2605
30	0.15	-0.00166	0.15494	0.004448	0.090854	0.929026	0.015528	0.005	5.9065	0.2643
31	0.155	-0.00129	0.1551	0.004465	0.090994	0.92913	0.015603	0.00557	5.9126	0.2679
32	0.16	-0.00092	0.15526	0.0044815	0.091134	0.929236	0.015672	0.00614	5.9184	0.2716
33	0.165	-0.00055	0.15542	0.004498	0.091268	0.929342	0.015739	0.00672	5.9244	0.2753
34	0.17	-0.00018	0.155575	0.004514	0.091401	0.929438	0.015806	0.00727	5.9304	0.2788
35	0.175	0.00018	0.155715	0.00453	0.091536	0.929539	0.01587	0.00783	5.9359	0.2822
36	0.18	0.00053	0.155865	0.004545	0.091669	0.929638	0.015935	0.00838	5.9414	0.2855
37	0.185	0.00088	0.15601	0.00456	0.09179	0.929733	0.015999	0.00891	5.9469	0.2889
38	0.19	0.00122	0.15615	0.004575	0.091918	0.929827	0.016063	0.00944	5.9523	0.2923
39	0.195	0.00154	0.156285	0.0045895	0.092036	0.929917	0.016127	0.00996	5.9576	0.2957
40	0.2	0.00187	0.156425	0.0046035	0.092155	0.930002	0.016189	0.01046	5.9625	0.2992
41	0.205	0.0022	0.15656	0.0046175	0.092277	0.930089	0.016248	0.01095	5.9675	0.3026
42	0.21	0.00252	0.156685	0.004632	0.092393	0.930172	0.016307	0.01145	5.9725	0.3058
43	0.215	0.00284	0.156815	0.004646	0.092514	0.93026	0.016366	0.01195	5.9775	0.3089
44	0.22	0.00314	0.15695	0.0046595	0.09263	0.93034	0.016426	0.01244	5.9821	0.3121
45	0.225	0.00347	0.157075	0.004673	0.092738	0.930425	0.016483	0.0129	5.9868	0.3152
46	0.23	0.00378	0.1572	0.0046865	0.092849	0.930505	0.016541	0.01338	5.9918	0.3185
47	0.235	0.00408	0.15733	0.0046995	0.092957	0.930586	0.016597	0.01383	5.9967	0.3217
48	0.24	0.00437	0.15745	0.004712	0.093062	0.930663	0.016653	0.0143	6.0014	0.3249
49	0.245	0.00467	0.15757	0.004725	0.093171	0.930745	0.016706	0.01475	6.006	0.3281
50	0.25	0.00496	0.15769	0.0047375	0.093279	0.930824	0.016759	0.01521	6.0105	0.3314
51	0.255	0.00525	0.157805	0.00475	0.093389	0.930899	0.016814	0.01566	6.0151	0.3348
52	0.26	0.00553	0.157925	0.004763	0.093495	0.93098	0.016868	0.01608	6.0195	0.3379
53	0.265	0.00581	0.15804	0.004776	0.093602	0.931055	0.016921	0.01651	6.0239	0.341
54	0.27	0.00608	0.158155	0.004788	0.093706	0.931133	0.016973	0.01693	6.0283	0.3442
55	0.275	0.00636	0.158265	0.0048	0.093809	0.931206	0.017024	0.01735	6.0328	0.3475
56	0.28	0.00664	0.15838	0.004812	0.093909	0.931279	0.017077	0.01777	6.0372	0.3508
57	0.285	0.00691	0.158495	0.0048235	0.094013	0.931356	0.017128	0.01819	6.0415	0.3538
58	0.29	0.00718	0.15861	0.0048355	0.094111	0.931429	0.017176	0.0186	6.0456	0.3571
59	0.295	0.00744	0.15872	0.0048475	0.094202	0.9315	0.017227	0.01902	6.0497	0.3605
60	0.3	0.0077	0.158835	0.0048595	0.094301	0.931571	0.017277	0.01944	6.0537	0.3636
61	0.305	0.00796	0.15894	0.004871	0.094398	0.931644	0.017327	0.01987	6.0579	0.3667
62	0.31	0.00822	0.159045	0.0048825	0.094489	0.931716	0.017378	0.02028	6.0618	0.37
63	0.315	0.00847	0.159155	0.004894	0.094585	0.931789	0.017427	0.0207	6.066	0.373
64	0.32	0.00873	0.159265	0.004906	0.094679	0.931859	0.017477	0.0211	6.0702	0.3763
65	0.325	0.00899	0.15937	0.0049185	0.094774	0.931929	0.017524	0.0215	6.0744	0.3794
66	0.33	0.00924	0.15948	0.0049295	0.094873	0.931998	0.017573	0.02189	6.0784	0.3825
67	0.335	0.00948	0.15958	0.0049415	0.094968	0.932065	0.017622	0.0223	6.0827	0.3858
68	0.34	0.00974	0.15969	0.004953	0.095061	0.932131	0.01767	0.0227	6.0868	0.389
69	0.345	0.00999	0.159795	0.004965	0.095153	0.932203	0.017718	0.0231	6.0908	0.3922
70	0.35	0.01023	0.1599	0.0049765	0.095243	0.93227	0.017764	0.02348	6.0949	0.3953
71	0.355	0.01047	0.160005	0.0049875	0.095334	0.932337	0.017812	0.02388	6.0988	0.3983
72	0.36	0.01071	0.160105	0.004998	0.095424	0.932405	0.01786	0.02426	6.103	0.4016
73	0.365	0.01095	0.16021	0.0050095	0.095516	0.932472	0.017906	0.02463	6.1068	0.4049
74	0.37	0.0112	0.16031	0.0050205	0.095608	0.932538	0.017953	0.025	6.1109	0.4082
75	0.375	0.01144	0.160415	0.005032	0.095701	0.932603	0.018	0.02539	6.1148	0.4115
76	0.38	0.01168	0.160515	0.0050425	0.095794	0.932666	0.01805	0.02575	6.1187	0.4148
77	0.385	0.01191	0.16062	0.005054	0.095885	0.93273	0.018097	0.02613	6.1226	0.418
78	0.39	0.01215	0.160725	0.0050655	0.095977	0.932793	0.018144	0.0265	6.1265	0.4211
79	0.395	0.0124	0.160825	0.0050765	0.096065	0.932857	0.018189	0.02686	6.1303	0.4244
80	0.4	0.01263	0.160925	0.005087	0.096153	0.932919	0.018236	0.02723	6.1343	0.4276
81	0.405	0.01288	0.161025	0.005098	0.096245	0.932981	0.018284	0.02759	6.1383	0.4309
82	0.41	0.01311	0.16113	0.005109	0.096334	0.933041	0.018329	0.02797	6.1419	0.4342
83	0.415	0.01334	0.16123	0.00512	0.096424	0.9331	0.018374	0.02834	6.1457	0.4376
84	0.42	0.01357	0.161325	0.005131	0.096512	0.933163	0.018421	0.02871	6.1495	0.441
85	0.425	0.01381	0.161425	0.0051415	0.0966	0.933224	0.018466	0.02908	6.1533	0.4444
86	0.43	0.01404	0.161525	0.0051525	0.096687	0.933286	0.018509	0.02944	6.1573	0.4478
87	0.435	0.01427	0.161625	0.0051635	0.096779	0.933346	0.018555	0.02979	6.1613	0.451
88	0.44	0.01449	0.161725	0.0051735	0.096869	0.933409	0.018601	0.03014	6.1652	0.4544
89	0.445	0.01471	0.161825	0.0051845	0.09696	0.933473	0.018648	0.0305	6.169	0.4578
90	0.45	0.01493	0.16192	0.005195	0.097049	0.933534	0.018693	0.03085	6.1727	0.4612
91	0.455	0.01516	0.162025	0.005206	0.097139	0.933594	0.018738	0.03119	6.1765	0.4645
92	0.46	0.01538	0.16212	0.005216	0.097228	0.933654	0.018787	0.03153	6.1803	0.4679
93	0.465	0.01561	0.16222	0.005227	0.097318	0.933714	0.018833	0.0319	6.1842	0.4715
94	0.47	0.01584	0.16232	0.0052375	0.097407	0.933776	0.01888	0.03225	6.188	0.475
95	0.475	0.01607	0.162415	0.005248	0.097498	0.933837	0.018925	0.03261	6.1917	0.4785
96	0.48	0.01629	0.16251	0.005259	0.097589	0.933899	0.01897	0.03295	6.1956	0.4819
97	0.485	0.01652	0.162605	0.005269	0.097679	0.933959	0.019016	0.03331	6.1994	0.4855
98	0.49	0.01673	0.162705	0.00528	0.097765	0.934021	0.019061	0.03367	6.203	0.489
99	0.495	0.01696	0.1628	0.005291	0.097855	0.93408	0.019108	0.03404	6.2068	0.4926
100	0.5	0.01717	0.162905	0.005301	0.097944	0.934143	0.019155	0.0344	6.2107	0.4962
101	0.505	0.0174	0.163	0.0053115	0.098032	0.934204	0.019199	0.03475	6.2143	0.4996
102	0.51	0.01762	0.16309	0.0053225	0.098119	0.934264	0.019246	0.03511	6.2181	0.5032
103	0.515	0.01784	0.16319	0.0053335	0.098212	0.934325	0.019293	0.03547	6.2222	0.5067
104	0.52	0.01806	0.163285	0.005344	0.098305	0.934389	0.019338	0.03586	6.226	0.5103
105	0.525	0.01829	0.16338	0.0053545	0.098395	0.934451	0.019385	0.0362	6.2299	0.514
106	0.53	0.0185	0.16348	0.0053655	0.098486	0.934516	0.019431	0.03657	6.2338	0.518
107	0.535	0.01871	0.163575	0.005376	0.09858	0.934576	0.01948	0.03693	6.2375	0.5216
108	0.54	0.01894	0.163675	0.0053865	0.098671	0.934639	0.019527	0.03728	6.2414	0.5253
109	0.545	0.01916	0.16377	0.005397	0.098763	0.934703	0.019571	0.03763	6.2452	0.5291
110	0.55	0.01938	0.16387	0.0054075	0.098854	0.934764	0.019618	0.03798	6.249	0.533
111	0.555	0.0196	0.16397	0.0054175	0.098947	0.934825	0.019665	0.03833	6.253	0.5368
112	0.56	0.01982	0.164065	0.005428	0.099039	0.934889	0.019712	0.0387	6.2568	0.5406
113	0.565	0.02005	0.164165	0.005439	0.099137	0.934951	0.019758	0.03905	6.2607	0.5448
114	0.57	0.0203	0.164265	0.0054495	0.099227	0.935014	0.019804	0.03941	6.2645	0.5485
115	0.575	0.02053	0.16436	0.0054605	0.099322	0.935075	0.01985	0.03976	6.2685	0.5524
116	0.58	0.02076	0.164465	0.0054715	0.099413	0.935135	0.019896	0.04012	6.2725	0.5566
117	0.585	0.02099	0.164565	0.005483	0.099506	0.935196	0.019946	0.04046	6.2765	0.5606
118	0.59	0.02123	0.16467	0.005494	0.099596	0.935259	0.019993	0.04083	6.2805	0.5647
119	0.595	0.02147	0.164765	0.0055055	0.099691	0.935318	0.02004	0.04119	6.2842	0.5687
120	0.6	0.02171	0.16487	0.005516	0.099787	0.935378	0.020088	0.04154	6.2882	0.5728
121	0.605	0.02195	0.16497	0.0055275	0.09988	0.93544	0.020135	0.0419	6.2923	0.5768
122	0.61	0.02219	0.16507	0.005539	0.099973	0.935502	0.020185	0.04226	6.2962	0.5808
123	0.615	0.02243	0.165165	0.0055505	0.10007	0.935566	0.020234	0.0426	6.3002	0.5851
124	0.62	0.02268	0.16527	0.0055615	0.100166	0.935628	0.020283	0.04298	6.3043	0.5895
125	0.625	0.02292	0.165375	0.005573	0.100261	0.935688	0.020334	0.04335	6.3084	0.5938
126	0.63	0.02317	0.165475	0.005585	0.10036	0.935749	0.020382	0.04372	6.3126	0.5983
127	0.635	0.02342	0.165575	0.005596	0.100459	0.935811	0.02043	0.0441	6.3167	0.603
128	0.64	0.02367	0.16568	0.005607	0.10056	0.935876	0.02048	0.04447	6.3211	0.6074
129	0.645	0.02393	0.16579	0.005619	0.100657	0.935941	0.020529	0.04485	6.3253	0.612
130	0.65	0.02419	0.165895	0.005631	0.100756	0.936006	0.020578	0.04525	6.3295	0.6167
131	0.655	0.02445	0.166005	0.005643	0.10086	0.936069	0.020627	0.04565	6.3338	0.6214
132	0.66	0.02471	0.16611	0.0056545	0.100958	0.936133	0.020678	0.04605	6.338	0.6262
133	0.665	0.02497	0.166215	0.0056665	0.101058	0.9362	0.020729	0.04646	6.3426	0.6312
134	0.67	0.02522	0.166315	0.005679	0.101161	0.93627	0.02078	0.04685	6.347	0.6362
135	0.675	0.0255	0.166425	0.005691	0.101266	0.936338	0.020831	0.04725	6.3515	0.6409
136	0.68	0.02576	0.16653	0.0057035	0.101366	0.936402	0.020882	0.04765	6.3558	0.6459
137	0.685	0.02603	0.16664	0.005716	0.101471	0.936471	0.020936	0.04803	6.3603	0.6508
138	0.69	0.0263	0.16675	0.005728	0.10157	0.936538	0.020988	0.04844	6.3648	0.6559
139	0.695	0.02657	0.16686	0.0057405	0.101679	0.936606	0.021042	0.04884	6.3692	0.6611
140	0.7	0.02684	0.16697	0.005753	0.101785	0.936674	0.021098	0.04927	6.3735	0.6665
141	0.705	0.02712	0.167075	0.005765	0.101888	0.936742	0.021152	0.04967	6.3779	0.6718
142	0.71	0.02738	0.167185	0.005778	0.101999	0.936812	0.021207	0.05009	6.3825	0.6773
143	0.715	0.02767	0.1673	0.0057905	0.102109	0.936883	0.021263	0.05051	6.3874	0.6828
144	0.72	0.02794	0.167415	0.005803	0.102226	0.936952	0.021317	0.05094	6.392	0.6885
145	0.725	0.0282	0.167535	0.0058165	0.102333	0.93702	0.021373	0.05135	6.397	0.6942
146	0.73	0.02848	0.167645	0.0058295	0.10245	0.937089	0.02143	0.05176	6.4017	0.6998
147	0.735	0.02876	0.167765	0.0058425	0.102567	0.937162	0.021486	0.0522	6.4064	0.7057
148	0.74	0.02904	0.167875	0.005856	0.102681	0.937231	0.021544	0.05262	6.4115	0.7114
149	0.745	0.02933	0.167995	0.0058695	0.102796	0.937303	0.021603	0.05303	6.4164	0.7177
150	0.75	0.02962	0.168115	0.005883	0.102905	0.937377	0.021662	0.05346	6.4217	0.724
151	0.755	0.02991	0.168235	0.0058975	0.103027	0.937451	0.021723	0.0539	6.4266	0.7303
152	0.76	0.03019	0.16836	0.0059125	0.103146	0.937526	0.021782	0.05433	6.4317	0.7368
153	0.765	0.03048	0.16848	0.005927	0.103265	0.937601	0.021846	0.0548	6.437	0.7432
154	0.77	0.03077	0.16861	0.0059415	0.103387	0.937677	0.021911	0.05525	6.4422	0.7499
155	0.775	0.03108	0.16874	0.005957	0.10351	0.937753	0.021972	0.05572	6.4475	0.7571
156	0.78	0.03138	0.168875	0.0059725	0.103637	0.937828	0.022038	0.05619	6.453	0.7642
157	0.785	0.03168	0.169	0.005988	0.103764	0.937904	0.022105	0.05669	6.4586	0.7714
158	0.79	0.03199	0.169135	0.0060035	0.103892	0.937982	0.022169	0.05714	6.4643	0.779
159	0.795	0.0323	0.16927	0.0060195	0.104024	0.938063	0.022238	0.05763	6.47	0.7868
160	0.8	0.03262	0.169405	0.0060355	0.104151	0.938145	0.022306	0.05812	6.4758	0.7945
161	0.805	0.03295	0.169545	0.006053	0.104287	0.938228	0.022381	0.05864	6.4816	0.8028
162	0.81	0.03329	0.169685	0.006069	0.104429	0.938312	0.022454	0.05912	6.4872	0.8107
163	0.815	0.03362	0.16983	0.006085	0.10457	0.938396	0.022529	0.05962	6.4931	0.8192
164	0.82	0.03397	0.16997	0.0061015	0.104714	0.93848	0.022606	0.06014	6.4994	0.8275
165	0.825	0.03431	0.170125	0.0061185	0.104864	0.93857	0.022676	0.06067	6.5053	0.836
166	0.83	0.03465	0.170275	0.006137	0.105014	0.93866	0.022753	0.06123	6.5116	0.8446
167	0.835	0.035	0.170425	0.0061545	0.105152	0.938748	0.022835	0.0618	6.5178	0.8532
168	0.84	0.03535	0.170585	0.0061725	0.105302	0.938843	0.022916	0.06234	6.5242	0.8623
169	0.845	0.03573	0.170755	0.006191	0.105467	0.938937	0.022995	0.06294	6.5305	0.8719
170	0.85	0.03612	0.17092	0.006211	0.105636	0.939037	0.023079	0.06355	6.5373	0.8818
171	0.855	0.03649	0.171085	0.006231	0.105799	0.939136	0.023165	0.06415	6.5441	0.8919
172	0.86	0.0369	0.171265	0.006251	0.105968	0.939233	0.023255	0.06482	6.5516	0.9024
173	0.865	0.0373	0.17144	0.0062735	0.106138	0.939331	0.023348	0.06547	6.559	0.913
174	0.87	0.0377	0.171625	0.006295	0.106312	0.939432	0.023443	0.06617	6.5666	0.9241
175	0.875	0.03813	0.171815	0.0063175	0.106486	0.939536	0.023542	0.06684	6.5747	0.9358
176	0.88	0.03858	0.172015	0.006341	0.106675	0.939645	0.023637	0.06753	6.5826	0.9482
177	0.885	0.03903	0.172215	0.006365	0.106869	0.939757	0.023743	0.06825	6.5906	0.9607
178	0.89	0.03947	0.172415	0.006389	0.107063	0.939871	0.023848	0.06899	6.5994	0.9741
179	0.895	0.03994	0.17263	0.0064145	0.107261	0.93998	0.023953	0.06975	6.6084	0.9873
180	0.9	0.04044	0.172865	0.0064415	0.107474	0.940096	0.024063	0.07051	6.6178	1.001
181	0.905	0.04094	0.17311	0.0064685	0.107694	0.940216	0.024185	0.07134	6.6273	1.0158
182	0.91	0.04143	0.173355	0.0064975	0.107928	0.940345	0.024311	0.07217	6.638	1.0314
183	0.915	0.04199	0.173625	0.0065275	0.108167	0.940478	0.024437	0.07306	6.6487	1.048
184	0.92	0.04255	0.17389	0.0065605	0.108414	0.940621	0.024568	0.07399	6.66	1.0647
185	0.925	0.04314	0.17418	0.0065925	0.108664	0.94077	0.024708	0.07495	6.6719	1.083
186	0.93	0.04376	0.174485	0.0066275	0.108932	0.940922	0.024853	0.07594	6.684	1.103
187	0.935	0.04442	0.1748	0.006664	0.109222	0.941085	0.025007	0.077	6.6969	1.1237
188	0.94	0.04513	0.175125	0.0067035	0.10952	0.941255	0.025173	0.0781	6.7105	1.1468
189	0.945	0.04587	0.175475	0.006746	0.109847	0.941442	0.025343	0.07924	6.7248	1.173
190	0.95	0.04663	0.175865	0.0067935	0.110201	0.941644	0.025527	0.08053	6.7405	1.2022
191	0.955	0.0475	0.17628	0.0068455	0.110574	0.941855	0.025724	0.08191	6.7578	1.2334
192	0.96	0.04841	0.17673	0.0069015	0.111001	0.94208	0.025951	0.08343	6.7777	1.2665
193	0.965	0.0494	0.17722	0.0069645	0.111477	0.942318	0.026195	0.08514	6.7993	1.3056
194	0.97	0.05053	0.177755	0.007035	0.112027	0.942592	0.026477	0.08705	6.8233	1.3493
195	0.975	0.05191	0.17838	0.0071145	0.112659	0.942895	0.026815	0.08934	6.85	1.4036
196	0.98	0.05364	0.179105	0.0072045	0.113416	0.943271	0.027223	0.09196	6.8832	1.4774
197	0.985	0.0558	0.180055	0.007319	0.114351	0.943725	0.027718	0.09522	6.9296	1.5663
198	0.99	0.0586	0.181395	0.00749	0.115638	0.944329	0.028408	0.09991	6.9883	1.6798
199	0.995	0.06346	0.183675	0.0077425	0.117693	0.945277	0.029533	0.10713	7.0895	1.8647
200	1	0	0	0	0	0	0	0	0	0
201	1.005	0	0	0	0	0	0	0	0	0
