# Supplementary material for: Time-varying asymmetry and tail thickness in long series of daily financial returns
Source: publisher site journal article supplement (doi:10.1515/snde-2017-0071), 2018-10-02
Supplement: Supplementary file 173 [file mq_add.xlsx]

## Sheet: 1
	quantile	(a1+a2)/2+b1	a0/[1-(a1+a2)/2-b1]	[a0/(1-(a1+a2)/2-b1)]^0.5	alpha1/alpha2
1	0.005	0.987449	0.5097	0.7137	3.342
2	0.01	0.987985	0.5238	0.7236	3.473
3	0.015	0.988313	0.5335	0.7303	3.5525
4	0.02	0.988553	0.5409	0.7354	3.6175
5	0.025	0.988743	0.5465	0.7392	3.6725
6	0.03	0.988901	0.5518	0.7427	3.7175
7	0.035	0.989044	0.5565	0.7459	3.7585
8	0.04	0.989173	0.5609	0.7489	3.795
9	0.045	0.989286	0.565	0.7516	3.8265
10	0.05	0.989391	0.5689	0.7542	3.8555
11	0.055	0.989488	0.5721	0.7564	3.883
12	0.06	0.989578	0.5754	0.7585	3.9115
13	0.065	0.989661	0.5785	0.7606	3.9365
14	0.07	0.989744	0.5814	0.7624	3.9605
15	0.075	0.989821	0.5842	0.7643	3.984
16	0.08	0.989894	0.587	0.7661	4.007
17	0.085	0.989967	0.5896	0.7678	4.028
18	0.09	0.990036	0.5922	0.7695	4.0475
19	0.095	0.990102	0.5946	0.7711	4.0675
20	0.1	0.990164	0.597	0.7726	4.0865
21	0.105	0.990225	0.5995	0.7742	4.106
22	0.11	0.990284	0.6018	0.7757	4.124
23	0.115	0.990341	0.6039	0.7771	4.142
24	0.12	0.990394	0.6061	0.7785	4.159
25	0.125	0.990447	0.6083	0.7799	4.1755
26	0.13	0.990498	0.6105	0.7813	4.192
27	0.135	0.990549	0.6126	0.7826	4.208
28	0.14	0.990598	0.6146	0.7839	4.2235
29	0.145	0.990646	0.6167	0.7852	4.2395
30	0.15	0.99069	0.6186	0.7865	4.2545
31	0.155	0.990734	0.6204	0.7876	4.27
32	0.16	0.990778	0.6223	0.7888	4.285
33	0.165	0.990821	0.6241	0.79	4.299
34	0.17	0.990863	0.6259	0.7911	4.314
35	0.175	0.990904	0.6277	0.7922	4.3285
36	0.18	0.990943	0.6295	0.7934	4.343
37	0.185	0.99098	0.6312	0.7944	4.357
38	0.19	0.99102	0.6329	0.7955	4.371
39	0.195	0.991057	0.6346	0.7966	4.385
40	0.2	0.991094	0.6363	0.7976	4.3985
41	0.205	0.991131	0.638	0.7987	4.4125
42	0.21	0.991166	0.6396	0.7997	4.4255
43	0.215	0.991202	0.6413	0.8008	4.439
44	0.22	0.991238	0.6429	0.8018	4.453
45	0.225	0.991272	0.6446	0.8028	4.4655
46	0.23	0.991305	0.6462	0.8038	4.478
47	0.235	0.991339	0.6479	0.8049	4.49
48	0.24	0.991372	0.6495	0.8059	4.502
49	0.245	0.991405	0.6512	0.8069	4.5145
50	0.25	0.991438	0.6528	0.8079	4.527
51	0.255	0.991469	0.6543	0.8088	4.5395
52	0.26	0.991501	0.6559	0.8098	4.551
53	0.265	0.991533	0.6574	0.8108	4.5635
54	0.27	0.991563	0.659	0.8118	4.5755
55	0.275	0.991594	0.6606	0.8128	4.5875
56	0.28	0.991623	0.6622	0.8137	4.5995
57	0.285	0.991652	0.6638	0.8147	4.6115
58	0.29	0.991682	0.6655	0.8157	4.623
59	0.295	0.991712	0.6671	0.8167	4.635
60	0.3	0.99174	0.6687	0.8177	4.647
61	0.305	0.99177	0.6703	0.8187	4.6585
62	0.31	0.991799	0.6718	0.8196	4.67
63	0.315	0.991827	0.6734	0.8206	4.6815
64	0.32	0.991856	0.675	0.8216	4.693
65	0.325	0.991883	0.6765	0.8225	4.7045
66	0.33	0.991911	0.6781	0.8234	4.7155
67	0.335	0.991937	0.6797	0.8244	4.727
68	0.34	0.991965	0.6814	0.8254	4.7385
69	0.345	0.991992	0.683	0.8264	4.75
70	0.35	0.99202	0.6846	0.8274	4.762
71	0.355	0.992047	0.6862	0.8283	4.773
72	0.36	0.992074	0.6878	0.8293	4.784
73	0.365	0.992102	0.6893	0.8302	4.7955
74	0.37	0.992127	0.6909	0.8312	4.8075
75	0.375	0.992154	0.6925	0.8321	4.8185
76	0.38	0.992181	0.6941	0.8331	4.83
77	0.385	0.992208	0.6958	0.8341	4.841
78	0.39	0.992235	0.6974	0.8351	4.8525
79	0.395	0.992261	0.699	0.836	4.864
80	0.4	0.992288	0.7006	0.837	4.875
81	0.405	0.992315	0.7023	0.838	4.8865
82	0.41	0.992342	0.7039	0.8389	4.898
83	0.415	0.99237	0.7055	0.8399	4.909
84	0.42	0.992396	0.7071	0.8409	4.921
85	0.425	0.992421	0.7088	0.8419	4.9325
86	0.43	0.992446	0.7104	0.8429	4.944
87	0.435	0.992472	0.7121	0.8438	4.9555
88	0.44	0.992498	0.7137	0.8448	4.967
89	0.445	0.992523	0.7153	0.8457	4.979
90	0.45	0.992548	0.7171	0.8468	4.9905
91	0.455	0.992572	0.7187	0.8478	5.0015
92	0.46	0.992598	0.7204	0.8487	5.0135
93	0.465	0.992623	0.7221	0.8497	5.025
94	0.47	0.992649	0.7238	0.8507	5.037
95	0.475	0.992675	0.7254	0.8517	5.049
96	0.48	0.9927	0.7271	0.8527	5.061
97	0.485	0.992725	0.7289	0.8537	5.0725
98	0.49	0.992749	0.7306	0.8547	5.084
99	0.495	0.992774	0.7323	0.8557	5.096
100	0.5	0.9928	0.734	0.8567	5.1075
101	0.505	0.992826	0.7359	0.8578	5.1195
102	0.51	0.992852	0.7377	0.8589	5.132
103	0.515	0.992876	0.7395	0.8599	5.144
104	0.52	0.992901	0.7413	0.861	5.1565
105	0.525	0.992926	0.7432	0.8621	5.1685
106	0.53	0.99295	0.7451	0.8631	5.1815
107	0.535	0.992975	0.7469	0.8642	5.194
108	0.54	0.993002	0.7487	0.8652	5.207
109	0.545	0.993028	0.7506	0.8663	5.2195
110	0.55	0.993053	0.7524	0.8674	5.2325
111	0.555	0.993079	0.7544	0.8685	5.245
112	0.56	0.993104	0.7563	0.8696	5.258
113	0.565	0.993129	0.7582	0.8707	5.271
114	0.57	0.993154	0.7601	0.8718	5.284
115	0.575	0.993179	0.7621	0.8729	5.2975
116	0.58	0.993204	0.764	0.8741	5.311
117	0.585	0.99323	0.766	0.8752	5.324
118	0.59	0.993256	0.7681	0.8764	5.338
119	0.595	0.993282	0.7701	0.8775	5.3515
120	0.6	0.993307	0.7722	0.8787	5.365
121	0.605	0.993332	0.7743	0.8799	5.378
122	0.61	0.993358	0.7764	0.8811	5.3915
123	0.615	0.993383	0.7786	0.8824	5.4065
124	0.62	0.99341	0.7809	0.8836	5.4205
125	0.625	0.993437	0.783	0.8848	5.4345
126	0.63	0.993461	0.7852	0.8861	5.4485
127	0.635	0.993487	0.7874	0.8873	5.4635
128	0.64	0.993513	0.7897	0.8886	5.478
129	0.645	0.993538	0.7919	0.8899	5.4925
130	0.65	0.993564	0.7942	0.8912	5.507
131	0.655	0.99359	0.7964	0.8924	5.5215
132	0.66	0.993616	0.7988	0.8937	5.5375
133	0.665	0.993642	0.8013	0.8951	5.5525
134	0.67	0.993668	0.8037	0.8965	5.568
135	0.675	0.993696	0.8062	0.8978	5.583
136	0.68	0.993722	0.8086	0.8992	5.599
137	0.685	0.99375	0.8112	0.9006	5.614
138	0.69	0.993776	0.8137	0.902	5.63
139	0.695	0.993804	0.8164	0.9035	5.6455
140	0.7	0.993831	0.819	0.905	5.662
141	0.705	0.993859	0.8216	0.9064	5.6785
142	0.71	0.993885	0.8244	0.9079	5.6945
143	0.715	0.993914	0.8271	0.9094	5.7115
144	0.72	0.993944	0.8301	0.911	5.7285
145	0.725	0.993972	0.8329	0.9126	5.7455
146	0.73	0.994001	0.8358	0.9142	5.7625
147	0.735	0.994031	0.8387	0.9157	5.78
148	0.74	0.994061	0.8416	0.9174	5.7975
149	0.745	0.99409	0.8447	0.919	5.816
150	0.75	0.994121	0.8479	0.9208	5.8345
151	0.755	0.994153	0.8511	0.9225	5.853
152	0.76	0.994183	0.8546	0.9244	5.872
153	0.765	0.994215	0.8579	0.9262	5.8915
154	0.77	0.994247	0.8614	0.9281	5.912
155	0.775	0.994282	0.8649	0.93	5.932
156	0.78	0.994315	0.8684	0.9319	5.952
157	0.785	0.994348	0.8723	0.9339	5.973
158	0.79	0.994381	0.8761	0.936	5.994
159	0.795	0.994416	0.8801	0.9381	6.017
160	0.8	0.994452	0.884	0.9402	6.04
161	0.805	0.994487	0.8881	0.9423	6.064
162	0.81	0.994521	0.8922	0.9446	6.087
163	0.815	0.994556	0.8965	0.9468	6.1125
164	0.82	0.994591	0.9011	0.9493	6.137
165	0.825	0.994628	0.9056	0.9516	6.1625
166	0.83	0.994664	0.9103	0.9541	6.188
167	0.835	0.994703	0.9153	0.9567	6.214
168	0.84	0.994743	0.9201	0.9592	6.2425
169	0.845	0.994785	0.9252	0.9618	6.27
170	0.85	0.994824	0.9307	0.9647	6.2975
171	0.855	0.994866	0.9363	0.9676	6.3285
172	0.86	0.994909	0.9421	0.9706	6.359
173	0.865	0.994954	0.9481	0.9737	6.389
174	0.87	0.994996	0.9545	0.977	6.42
175	0.875	0.995042	0.9608	0.9802	6.452
176	0.88	0.995089	0.9677	0.9837	6.4865
177	0.885	0.99514	0.9748	0.9873	6.5205
178	0.89	0.995192	0.9825	0.9912	6.557
179	0.895	0.995245	0.9903	0.9951	6.597
180	0.9	0.9953	0.9987	0.9993	6.638
181	0.905	0.995358	1.0076	1.0038	6.6805
182	0.91	0.995416	1.0167	1.0083	6.7245
183	0.915	0.995473	1.0267	1.0132	6.7725
184	0.92	0.995533	1.0373	1.0184	6.8225
185	0.925	0.995599	1.0483	1.0238	6.8755
186	0.93	0.995666	1.0616	1.0303	6.9295
187	0.935	0.995742	1.0754	1.037	6.989
188	0.94	0.99582	1.0908	1.0444	7.0555
189	0.945	0.995904	1.1083	1.0527	7.125
190	0.95	0.995993	1.1282	1.0622	7.2055
191	0.955	0.996091	1.1507	1.0727	7.2935
192	0.96	0.996199	1.1761	1.0844	7.3875
193	0.965	0.99631	1.2068	1.0985	7.4975
194	0.97	0.996445	1.2431	1.1149	7.619
195	0.975	0.996597	1.2891	1.1354	7.7655
196	0.98	0.996779	1.347	1.1606	7.95
197	0.985	0.99701	1.426	1.1941	8.187
198	0.99	0.997336	1.5612	1.2495	8.523
199	0.995	0.997847	1.8345	1.3544	9.1745
200	1	0	0	0	0
201	1.005	0	0	0	0
