# Supplementary material for: Time-varying asymmetry and tail thickness in long series of daily financial returns
Source: publisher site journal article supplement (doi:10.1515/snde-2017-0071), 2018-10-02
Supplement: Supplementary file 175 [file point_est.xlsx]

## Sheet: 1
	log post kernel	delta	rho	alpha0	alpha1-	beta1	alpha1+	lambda1	ni1=ni2	h0	Var11	Var12	Var13	Var14	Var15	Var16	Var17	Var18	Var19	(a1+a2)/2+b1	a0/[1-(a1+a2)/2-b1]	[a0/(1-(a1+a2)/2-b1)]^0.5	alpha1/alpha2
1	-16592.6	0.0161079	0.32817	-5.23295	-2.21892	2.64708	-3.91481	0.0361365	1.4395	-0.67168	0.0161079	0.162628	0.00533776	0.0980639	0.933831	0.0195543	0.0361365	6.21958	0.51085	0.99264	0.725238	0.851609	5.01495
2	-16592.8	0.0173378	0.328017	-5.27898	-2.24131	2.6768	-3.97059	0.0342671	1.43748	-1.03775	0.0173378	0.162553	0.00509765	0.0961016	0.935643	0.0185131	0.0342671	6.21109	0.35425	0.992951	0.723154	0.850384	5.191
3	-16592.6	0.0171513	0.328828	-5.24691	-2.2199	2.65268	-3.94688	0.0343996	1.4373	-0.728781	0.0171513	0.162948	0.00526375	0.097978	0.934176	0.0189489	0.0343996	6.21034	0.482497	0.992639	0.71511	0.845642	5.17065
