# Supplementary material for: Time-varying asymmetry and tail thickness in long series of daily financial returns
Source: publisher site journal article supplement (doi:10.1515/snde-2017-0071), 2018-10-02
Supplement: Supplementary file 177 [file post_es.xlsx]

## Sheet: 1
	delta	rho	alpha0	alpha1-	beta1	alpha1+	lambda1	ni1=ni2	h0	(a1+a2)/2+b1	a0/[1-(a1+a2)/2-b1]	[a0/(1-(a1+a2)/2-b1)]^0.5	alpha1/alpha2
1	0.0171513	0.162938	0.00533261	0.0982059	0.934014	0.0192929	0.0343996	6.22144	0.567586	0.992764	0.783851	0.877425	5.26906
2	0.0181616	0.00781393	0.000854504	0.00709771	0.00479658	0.00364971	0.0281162	0.306744	0.331127	0.00200701	0.510123	0.117992	1.05868
