# Supplementary material for: Time-varying asymmetry and tail thickness in long series of daily financial returns
Source: publisher site journal article supplement (doi:10.1515/snde-2017-0071), 2018-10-02
Supplement: Supplementary file 185 [file probs.xlsx]

## Sheet: 1
	(a1+a2)/2+b1 > 1	alpha1 <= alpha2	lambda1 <= 0	Var4	Var5	Var6
1	0.000279328	0	0.111534	140	0	55901
