# Supplementary material for: Time-varying asymmetry and tail thickness in long series of daily financial returns
Source: publisher site journal article supplement (doi:10.1515/snde-2017-0071), 2018-10-02
Supplement: Supplementary file 187 [file r_1.xlsx]

## Sheet: 1
	Var1	Var2	Var3	Var4	Var5	Var6	Var7	Var8	Var9	Var10	Var11	Var12	Var13	Var14	Var15	Var16	Var17	Var18	Var19	Var20	Var21	Var22	Var23	Var24	Var25
1	0	0.039782	0.0783208	0.0435116	0.0870231	0.030714	0.0895095	0.054962	0.0171193	0.0189869	0.0783208	0.080329	0.054962	0.0404236	0.0267763	0.0174046	0.0372956	0.0169342	0.0372956	0.0189869	0.0432115	0.348092	0.0197033	0.0171193	0.059673
2	0	0.130125	0.13031	0.13051	0.13069	0.13092	0.13116	0.131325	0.131725	0.132305	0.13266	0.132805	0.132965	0.133215	0.133565	0.13406	0.1345	0.13501	0.13552	0.135935	0.136355	0.136515	0.136795	0.137365	0.13781
3	0	4	6	5	5	5	6	5	5	5	6	5	5	6	5	5	5	6	5	5	6	5	5	5	8
4	0.13002	0.13023	0.13039	0.13063	0.13075	0.13109	0.13123	0.13142	0.13203	0.13258	0.13274	0.13287	0.13306	0.13337	0.13376	0.13436	0.13464	0.13538	0.13566	0.13621	0.1365	0.13653	0.13706	0.13767	0.13795
