# Supplementary material for: Time-varying asymmetry and tail thickness in long series of daily financial returns
Source: publisher site journal article supplement (doi:10.1515/snde-2017-0071), 2018-10-02
Supplement: Supplementary file 189 [file r_2.xlsx]

## Sheet: 1
	Var1	Var2	Var3	Var4	Var5	Var6	Var7	Var8	Var9	Var10	Var11	Var12
1	0	7.35265e-05	0.000115662	6.92695e-05	2.35028e-05	3.31922e-05	2.35863e-05	3.56502e-05	2.94679e-05	7.65642e-06	7.05209e-06	1.02694e-06
2	0	3.1336	3.19295	3.31347	3.61101	3.99048	4.36916	4.73699	5.06064	5.91979	7.34216	11.1332
3	0	1	5	5	5	5	5	5	5	5	5	3
4	3.1194	3.14781	3.23809	3.38885	3.83317	4.14778	4.59053	4.88345	5.23783	6.60176	8.08256	14.1838
