# Supplementary material for: Time-varying asymmetry and tail thickness in long series of daily financial returns
Source: publisher site journal article supplement (doi:10.1515/snde-2017-0071), 2018-10-02
Supplement: Supplementary file 191 [file thres_inm.xlsx]

## Sheet: 1
	Var1	Var2	Var3	Var4	Var5	Var6	Var7	Var8	Var9	Var10	Var11	Var12	Var13	Var14	Var15	Var16	Var17	Var18	Var19	Var20	Var21	Var22	Var23	Var24	Var25
1	0	0	0	0	0	0	0	0	0	0	0	0	0	0	0	0	0	0	0	0	0	0	0	0	0
2	0.05	-0.01122	0.1	-0.00153	0.125	0.00203	0.2	0.01063	0.25	0.01536	0.5	0.03444	0.75	0.05345	0.8	0.05809	0.875	0.06676	0.9	0.07042	0.95	0.0804	111	0.03186	14.1611
3	0.05	-0.01122	0.1	-0.00153	0.125	0.00203	0.2	0.01063	0.25	0.01536	0.5	0.03444	0.75	0.05345	0.8	0.05809	0.875	0.06676	0.9	0.07042	0.95	0.0804	111	0.03186	14.1611
4	0.05	-0.01122	0.1	-0.00153	0.125	0.00203	0.2	0.01063	0.25	0.01536	0.5	0.03444	0.75	0.05345	0.8	0.05809	0.875	0.06676	0.9	0.07042	0.95	0.0804	111	0.03186	14.1611
5	0.05	-0.01122	0.1	-0.00153	0.125	0.00203	0.2	0.01063	0.25	0.01536	0.5	0.03444	0.75	0.05345	0.8	0.05809	0.875	0.06676	0.9	0.07042	0.95	0.0804	111	0.03186	14.1611
6	0.05	-0.01122	0.1	-0.00153	0.125	0.00203	0.2	0.01063	0.25	0.01536	0.5	0.03444	0.75	0.05345	0.8	0.05809	0.875	0.06676	0.9	0.07042	0.95	0.0804	111	0.03186	14.1611
7	0.05	-0.01122	0.1	-0.00153	0.125	0.00203	0.2	0.01063	0.25	0.01536	0.5	0.03444	0.75	0.05345	0.8	0.05809	0.875	0.06676	0.9	0.07042	0.95	0.0804	111	0.03186	14.1611
8	0.05	-0.01122	0.1	-0.00153	0.125	0.00203	0.2	0.01063	0.25	0.01536	0.5	0.03444	0.75	0.05345	0.8	0.05809	0.875	0.06676	0.9	0.07042	0.95	0.0804	111	0.03186	14.1611
9	0.05	-0.01122	0.1	-0.00153	0.125	0.00203	0.2	0.01063	0.25	0.01536	0.5	0.03444	0.75	0.05345	0.8	0.05809	0.875	0.06676	0.9	0.07042	0.95	0.0804	111	0.03186	14.1611
10	0.05	-0.01122	0.1	-0.00153	0.125	0.00203	0.2	0.01063	0.25	0.01536	0.5	0.03444	0.75	0.05345	0.8	0.05809	0.875	0.06676	0.9	0.07042	0.95	0.0804	111	0.03186	14.1611
11	0.05	-0.01122	0.1	-0.00153	0.125	0.00203	0.2	0.01063	0.25	0.01536	0.5	0.03444	0.75	0.05345	0.8	0.05809	0.875	0.06676	0.9	0.07042	0.95	0.0804	111	0.03186	14.1611
12	0.05	-0.01122	0.1	-0.00153	0.125	0.00203	0.2	0.01063	0.25	0.01536	0.5	0.03444	0.75	0.05345	0.8	0.05809	0.875	0.06676	0.9	0.07042	0.95	0.0804	111	0.03186	14.1611
13	0.05	-0.01122	0.1	-0.00153	0.125	0.00203	0.2	0.01063	0.25	0.01536	0.5	0.03444	0.75	0.05345	0.8	0.05809	0.875	0.06676	0.9	0.07042	0.95	0.0804	111	0.03186	14.1611
14	0.05	-0.01122	0.1	-0.00153	0.125	0.00203	0.2	0.01063	0.25	0.01536	0.5	0.03444	0.75	0.05345	0.8	0.05809	0.875	0.06676	0.9	0.07042	0.95	0.0804	111	0.03186	14.1611
15	0.05	-0.01122	0.1	-0.00153	0.125	0.00203	0.2	0.01063	0.25	0.01536	0.5	0.03444	0.75	0.05345	0.8	0.05809	0.875	0.06676	0.9	0.07042	0.95	0.0804	111	0.03186	14.1611
16	0.05	-0.01122	0.1	-0.00153	0.125	0.00203	0.2	0.01063	0.25	0.01536	0.5	0.03444	0.75	0.05345	0.8	0.05809	0.875	0.06676	0.9	0.07042	0.95	0.0804	111	0.03186	14.1611
17	0.05	-0.01122	0.1	-0.00153	0.125	0.00203	0.2	0.01063	0.25	0.01536	0.5	0.03444	0.75	0.05345	0.8	0.05809	0.875	0.06676	0.9	0.07042	0.95	0.0804	111	0.03186	14.1611
18	0.05	-0.01122	0.1	-0.00153	0.125	0.00203	0.2	0.01063	0.25	0.01536	0.5	0.03444	0.75	0.05345	0.8	0.05809	0.875	0.06676	0.9	0.07042	0.95	0.0804	111	0.03186	14.1611
19	0.05	-0.01122	0.1	-0.00153	0.125	0.00203	0.2	0.01063	0.25	0.01536	0.5	0.03444	0.75	0.05345	0.8	0.05809	0.875	0.06676	0.9	0.07042	0.95	0.0804	111	0.03186	14.1611
20	0.05	-0.01122	0.1	-0.00153	0.125	0.00203	0.2	0.01063	0.25	0.01536	0.5	0.03444	0.75	0.05345	0.8	0.05809	0.875	0.06676	0.9	0.07042	0.95	0.0804	111	0.03186	14.1611
21	0.05	-0.01122	0.1	-0.00153	0.125	0.00203	0.2	0.01063	0.25	0.01536	0.5	0.03444	0.75	0.05345	0.8	0.05809	0.875	0.06676	0.9	0.07042	0.95	0.0804	111	0.03186	14.1611
22	0.05	-0.01122	0.1	-0.00153	0.125	0.00203	0.2	0.01063	0.25	0.01536	0.5	0.03444	0.75	0.05345	0.8	0.05809	0.875	0.06676	0.9	0.07042	0.95	0.0804	111	0.03186	14.1611
23	0.05	-0.01122	0.1	-0.00153	0.125	0.00203	0.2	0.01063	0.25	0.01536	0.5	0.03444	0.75	0.05345	0.8	0.05809	0.875	0.06676	0.9	0.07042	0.95	0.0804	111	0.03186	14.1611
24	0.05	-0.01122	0.1	-0.00153	0.125	0.00203	0.2	0.01063	0.25	0.01536	0.5	0.03444	0.75	0.05345	0.8	0.05809	0.875	0.06676	0.9	0.07042	0.95	0.0804	111	0.03186	14.1611
25	0.05	-0.01122	0.1	-0.00153	0.125	0.00203	0.2	0.01063	0.25	0.01536	0.5	0.03444	0.75	0.05345	0.8	0.05809	0.875	0.06676	0.9	0.07042	0.95	0.0804	111	0.03186	14.1611
26	0.05	-0.01122	0.1	-0.00153	0.125	0.00203	0.2	0.01063	0.25	0.01536	0.5	0.03444	0.75	0.05345	0.8	0.05809	0.875	0.06676	0.9	0.07042	0.95	0.0804	111	0.03186	14.1611
27	0.05	-0.01122	0.1	-0.00153	0.125	0.00203	0.2	0.01063	0.25	0.01536	0.5	0.03444	0.75	0.05345	0.8	0.05809	0.875	0.06676	0.9	0.07042	0.95	0.0804	111	0.03186	14.1611
28	0.05	-0.01122	0.1	-0.00153	0.125	0.00203	0.2	0.01063	0.25	0.01536	0.5	0.03444	0.75	0.05345	0.8	0.05809	0.875	0.06676	0.9	0.07042	0.95	0.0804	111	0.03186	14.1611
29	0.05	-0.01122	0.1	-0.00153	0.125	0.00203	0.2	0.01063	0.25	0.01536	0.5	0.03444	0.75	0.05345	0.8	0.05809	0.875	0.06676	0.9	0.07042	0.95	0.0804	111	0.03186	14.1611
30	0.05	-0.01122	0.1	-0.00153	0.125	0.00203	0.2	0.01063	0.25	0.01536	0.5	0.03444	0.75	0.05345	0.8	0.05809	0.875	0.06676	0.9	0.07042	0.95	0.0804	111	0.03186	14.1611
31	0.05	-0.01122	0.1	-0.00153	0.125	0.00203	0.2	0.01063	0.25	0.01536	0.5	0.03444	0.75	0.05345	0.8	0.05809	0.875	0.06676	0.9	0.07042	0.95	0.0804	111	0.03186	14.1611
32	0.05	-0.01122	0.1	-0.00153	0.125	0.00203	0.2	0.01063	0.25	0.01536	0.5	0.03444	0.75	0.05345	0.8	0.05809	0.875	0.06676	0.9	0.07042	0.95	0.0804	111	0.03186	14.1611
33	0.05	-0.01122	0.1	-0.00153	0.125	0.00203	0.2	0.01063	0.25	0.01536	0.5	0.03444	0.75	0.05345	0.8	0.05809	0.875	0.06676	0.9	0.07042	0.95	0.0804	111	0.03186	14.1611
34	0.05	-0.01122	0.1	-0.00153	0.125	0.00203	0.2	0.01063	0.25	0.01536	0.5	0.03444	0.75	0.05345	0.8	0.05809	0.875	0.06676	0.9	0.07042	0.95	0.0804	111	0.03186	14.1611
35	0.05	-0.01122	0.1	-0.00153	0.125	0.00203	0.2	0.01063	0.25	0.01536	0.5	0.03444	0.75	0.05345	0.8	0.05809	0.875	0.06676	0.9	0.07042	0.95	0.0804	111	0.03186	14.1611
36	0.05	-0.01122	0.1	-0.00153	0.125	0.00203	0.2	0.01063	0.25	0.01536	0.5	0.03444	0.75	0.05345	0.8	0.05809	0.875	0.06676	0.9	0.07042	0.95	0.0804	111	0.03186	14.1611
37	0.05	-0.01122	0.1	-0.00153	0.125	0.00203	0.2	0.01063	0.25	0.01536	0.5	0.03444	0.75	0.05345	0.8	0.05809	0.875	0.06676	0.9	0.07042	0.95	0.0804	111	0.03186	14.1611
38	0.05	-0.01122	0.1	-0.00153	0.125	0.00203	0.2	0.01063	0.25	0.01536	0.5	0.03444	0.75	0.05345	0.8	0.05809	0.875	0.06676	0.9	0.07042	0.95	0.0804	111	0.03186	14.1611
39	0.05	-0.01122	0.1	-0.00153	0.125	0.00203	0.2	0.01063	0.25	0.01536	0.5	0.03444	0.75	0.05345	0.8	0.05809	0.875	0.06676	0.9	0.07042	0.95	0.0804	111	0.03186	14.1611
40	0.05	-0.01122	0.1	-0.00153	0.125	0.00203	0.2	0.01063	0.25	0.01536	0.5	0.03444	0.75	0.05345	0.8	0.05809	0.875	0.06676	0.9	0.07042	0.95	0.0804	111	0.03186	14.1611
41	0.05	-0.01122	0.1	-0.00153	0.125	0.00203	0.2	0.01063	0.25	0.01536	0.5	0.03444	0.75	0.05345	0.8	0.05809	0.875	0.06676	0.9	0.07042	0.95	0.0804	111	0.03186	14.1611
42	0.05	-0.01122	0.1	-0.00153	0.125	0.00203	0.2	0.01063	0.25	0.01536	0.5	0.03444	0.75	0.05345	0.8	0.05809	0.875	0.06676	0.9	0.07042	0.95	0.0804	111	0.03186	14.1611
43	0.05	-0.01122	0.1	-0.00153	0.125	0.00203	0.2	0.01063	0.25	0.01536	0.5	0.03444	0.75	0.05345	0.8	0.05809	0.875	0.06676	0.9	0.07042	0.95	0.0804	111	0.03186	14.1611
44	0.05	-0.01122	0.1	-0.00153	0.125	0.00203	0.2	0.01063	0.25	0.01536	0.5	0.03444	0.75	0.05345	0.8	0.05809	0.875	0.06676	0.9	0.07042	0.95	0.0804	111	0.03186	14.1611
45	0.05	-0.01122	0.1	-0.00153	0.125	0.00203	0.2	0.01063	0.25	0.01536	0.5	0.03444	0.75	0.05345	0.8	0.05809	0.875	0.06676	0.9	0.07042	0.95	0.0804	111	0.03186	14.1611
46	0.05	-0.01122	0.1	-0.00153	0.125	0.00203	0.2	0.01063	0.25	0.01536	0.5	0.03444	0.75	0.05345	0.8	0.05809	0.875	0.06676	0.9	0.07042	0.95	0.0804	111	0.03186	14.1611
47	0.05	-0.01122	0.1	-0.00153	0.125	0.00203	0.2	0.01063	0.25	0.01536	0.5	0.03444	0.75	0.05345	0.8	0.05809	0.875	0.06676	0.9	0.07042	0.95	0.0804	111	0.03186	14.1611
48	0.05	-0.01122	0.1	-0.00153	0.125	0.00203	0.2	0.01063	0.25	0.01536	0.5	0.03444	0.75	0.05345	0.8	0.05809	0.875	0.06676	0.9	0.07042	0.95	0.0804	111	0.03186	14.1611
49	0.05	-0.01122	0.1	-0.00153	0.125	0.00203	0.2	0.01063	0.25	0.01536	0.5	0.03444	0.75	0.05345	0.8	0.05809	0.875	0.06676	0.9	0.07042	0.95	0.0804	111	0.03186	14.1611
50	0.05	-0.01122	0.1	-0.00153	0.125	0.00203	0.2	0.01063	0.25	0.01536	0.5	0.03444	0.75	0.05345	0.8	0.05809	0.875	0.06676	0.9	0.07042	0.95	0.0804	111	0.03186	14.1611
51	0.05	-0.01122	0.1	-0.00153	0.125	0.00203	0.2	0.01063	0.25	0.01536	0.5	0.03444	0.75	0.05345	0.8	0.05809	0.875	0.06676	0.9	0.07042	0.95	0.0804	111	0.03186	14.1611
52	0.05	-0.01122	0.1	-0.00153	0.125	0.00203	0.2	0.01063	0.25	0.01536	0.5	0.03444	0.75	0.05345	0.8	0.05809	0.875	0.06676	0.9	0.07042	0.95	0.0804	111	0.03186	14.1611
53	0.05	-0.01122	0.1	-0.00153	0.125	0.00203	0.2	0.01063	0.25	0.01536	0.5	0.03444	0.75	0.05345	0.8	0.05809	0.875	0.06676	0.9	0.07042	0.95	0.0804	111	0.03186	14.1611
54	0.05	-0.01122	0.1	-0.00153	0.125	0.00203	0.2	0.01063	0.25	0.01536	0.5	0.03444	0.75	0.05345	0.8	0.05809	0.875	0.06676	0.9	0.07042	0.95	0.0804	111	0.03186	14.1611
55	0.05	-0.01122	0.1	-0.00153	0.125	0.00203	0.2	0.01063	0.25	0.01536	0.5	0.03444	0.75	0.05345	0.8	0.05809	0.875	0.06676	0.9	0.07042	0.95	0.0804	111	0.03186	14.1611
56	0.05	-0.01122	0.1	-0.00153	0.125	0.00203	0.2	0.01063	0.25	0.01536	0.5	0.03444	0.75	0.05345	0.8	0.05809	0.875	0.06676	0.9	0.07042	0.95	0.0804	111	0.03186	14.1611
57	0.05	-0.01122	0.1	-0.00153	0.125	0.00203	0.2	0.01063	0.25	0.01536	0.5	0.03444	0.75	0.05345	0.8	0.05809	0.875	0.06676	0.9	0.07042	0.95	0.0804	111	0.03186	14.1611
58	0.05	-0.01122	0.1	-0.00153	0.125	0.00203	0.2	0.01063	0.25	0.01536	0.5	0.03444	0.75	0.05345	0.8	0.05809	0.875	0.06676	0.9	0.07042	0.95	0.0804	111	0.03186	14.1611
59	0.05	-0.01122	0.1	-0.00153	0.125	0.00203	0.2	0.01063	0.25	0.01536	0.5	0.03444	0.75	0.05345	0.8	0.05809	0.875	0.06676	0.9	0.07042	0.95	0.0804	111	0.03186	14.1611
60	0.05	-0.01122	0.1	-0.00153	0.125	0.00203	0.2	0.01063	0.25	0.01536	0.5	0.03444	0.75	0.05345	0.8	0.05809	0.875	0.06676	0.9	0.07042	0.95	0.0804	111	0.03186	14.1611
61	0.05	-0.01122	0.1	-0.00153	0.125	0.00203	0.2	0.01063	0.25	0.01536	0.5	0.03444	0.75	0.05345	0.8	0.05809	0.875	0.06676	0.9	0.07042	0.95	0.0804	111	0.03186	14.1611
62	0.05	-0.01122	0.1	-0.00153	0.125	0.00203	0.2	0.01063	0.25	0.01536	0.5	0.03444	0.75	0.05345	0.8	0.05809	0.875	0.06676	0.9	0.07042	0.95	0.0804	111	0.03186	14.1611
63	0.05	-0.01122	0.1	-0.00153	0.125	0.00203	0.2	0.01063	0.25	0.01536	0.5	0.03444	0.75	0.05345	0.8	0.05809	0.875	0.06676	0.9	0.07042	0.95	0.0804	111	0.03186	14.1611
64	0.05	-0.01122	0.1	-0.00153	0.125	0.00203	0.2	0.01063	0.25	0.01536	0.5	0.03444	0.75	0.05345	0.8	0.05809	0.875	0.06676	0.9	0.07042	0.95	0.0804	111	0.03186	14.1611
65	0.05	-0.01122	0.1	-0.00153	0.125	0.00203	0.2	0.01063	0.25	0.01536	0.5	0.03444	0.75	0.05345	0.8	0.05809	0.875	0.06676	0.9	0.07042	0.95	0.0804	111	0.03186	14.1611
66	0.05	-0.01122	0.1	-0.00153	0.125	0.00203	0.2	0.01063	0.25	0.01536	0.5	0.03444	0.75	0.05345	0.8	0.05809	0.875	0.06676	0.9	0.07042	0.95	0.0804	111	0.03186	14.1611
67	0.05	-0.01122	0.1	-0.00153	0.125	0.00203	0.2	0.01063	0.25	0.01536	0.5	0.03444	0.75	0.05345	0.8	0.05809	0.875	0.06676	0.9	0.07042	0.95	0.0804	111	0.03186	14.1611
68	0.05	-0.01122	0.1	-0.00153	0.125	0.00203	0.2	0.01063	0.25	0.01536	0.5	0.03444	0.75	0.05345	0.8	0.05809	0.875	0.06676	0.9	0.07042	0.95	0.0804	111	0.03186	14.1611
69	0.05	-0.01122	0.1	-0.00153	0.125	0.00203	0.2	0.01063	0.25	0.01536	0.5	0.03444	0.75	0.05345	0.8	0.05809	0.875	0.06676	0.9	0.07042	0.95	0.0804	111	0.03186	14.1611
70	0.05	-0.01122	0.1	-0.00153	0.125	0.00203	0.2	0.01063	0.25	0.01536	0.5	0.03444	0.75	0.05345	0.8	0.05809	0.875	0.06676	0.9	0.07042	0.95	0.0804	111	0.03186	14.1611
71	0.05	-0.01122	0.1	-0.00153	0.125	0.00203	0.2	0.01063	0.25	0.01536	0.5	0.03444	0.75	0.05345	0.8	0.05809	0.875	0.06676	0.9	0.07042	0.95	0.0804	111	0.03186	14.1611
72	0.05	-0.01122	0.1	-0.00153	0.125	0.00203	0.2	0.01063	0.25	0.01536	0.5	0.03444	0.75	0.05345	0.8	0.05809	0.875	0.06676	0.9	0.07042	0.95	0.0804	111	0.03186	14.1611
73	0.05	-0.01122	0.1	-0.00153	0.125	0.00203	0.2	0.01063	0.25	0.01536	0.5	0.03444	0.75	0.05345	0.8	0.05809	0.875	0.06676	0.9	0.07042	0.95	0.0804	111	0.03186	14.1611
74	0.05	-0.01122	0.1	-0.00153	0.125	0.00203	0.2	0.01063	0.25	0.01536	0.5	0.03444	0.75	0.05345	0.8	0.05809	0.875	0.06676	0.9	0.07042	0.95	0.0804	111	0.03186	14.1611
75	0.05	-0.01122	0.1	-0.00153	0.125	0.00203	0.2	0.01063	0.25	0.01536	0.5	0.03444	0.75	0.05345	0.8	0.05809	0.875	0.06676	0.9	0.07042	0.95	0.0804	111	0.03186	14.1611
76	0.05	-0.01122	0.1	-0.00153	0.125	0.00203	0.2	0.01063	0.25	0.01536	0.5	0.03444	0.75	0.05345	0.8	0.05809	0.875	0.06676	0.9	0.07042	0.95	0.0804	111	0.03186	14.1611
77	0.05	-0.01122	0.1	-0.00153	0.125	0.00203	0.2	0.01063	0.25	0.01536	0.5	0.03444	0.75	0.05345	0.8	0.05809	0.875	0.06676	0.9	0.07042	0.95	0.0804	111	0.03186	14.1611
78	0.05	-0.01122	0.1	-0.00153	0.125	0.00203	0.2	0.01063	0.25	0.01536	0.5	0.03444	0.75	0.05345	0.8	0.05809	0.875	0.06676	0.9	0.07042	0.95	0.0804	111	0.03186	14.1611
79	0.05	-0.01122	0.1	-0.00153	0.125	0.00203	0.2	0.01063	0.25	0.01536	0.5	0.03444	0.75	0.05345	0.8	0.05809	0.875	0.06676	0.9	0.07042	0.95	0.0804	111	0.03186	14.1611
80	0.05	-0.01122	0.1	-0.00153	0.125	0.00203	0.2	0.01063	0.25	0.01536	0.5	0.03444	0.75	0.05345	0.8	0.05809	0.875	0.06676	0.9	0.07042	0.95	0.0804	111	0.03186	14.1611
81	0.05	-0.01122	0.1	-0.00153	0.125	0.00203	0.2	0.01063	0.25	0.01536	0.5	0.03444	0.75	0.05345	0.8	0.05809	0.875	0.06676	0.9	0.07042	0.95	0.0804	111	0.03186	14.1611
82	0.05	-0.01122	0.1	-0.00153	0.125	0.00203	0.2	0.01063	0.25	0.01536	0.5	0.03444	0.75	0.05345	0.8	0.05809	0.875	0.06676	0.9	0.07042	0.95	0.0804	111	0.03186	14.1611
83	0.05	-0.01122	0.1	-0.00153	0.125	0.00203	0.2	0.01063	0.25	0.01536	0.5	0.03444	0.75	0.05345	0.8	0.05809	0.875	0.06676	0.9	0.07042	0.95	0.0804	111	0.03186	14.1611
84	0.05	-0.01122	0.1	-0.00153	0.125	0.00203	0.2	0.01063	0.25	0.01536	0.5	0.03444	0.75	0.05345	0.8	0.05809	0.875	0.06676	0.9	0.07042	0.95	0.0804	111	0.03186	14.1611
85	0.05	-0.01122	0.1	-0.00153	0.125	0.00203	0.2	0.01063	0.25	0.01536	0.5	0.03444	0.75	0.05345	0.8	0.05809	0.875	0.06676	0.9	0.07042	0.95	0.0804	111	0.03186	14.1611
86	0.05	-0.01122	0.1	-0.00153	0.125	0.00203	0.2	0.01063	0.25	0.01536	0.5	0.03444	0.75	0.05345	0.8	0.05809	0.875	0.06676	0.9	0.07042	0.95	0.0804	111	0.03186	14.1611
87	0.05	-0.01122	0.1	-0.00153	0.125	0.00203	0.2	0.01063	0.25	0.01536	0.5	0.03444	0.75	0.05345	0.8	0.05809	0.875	0.06676	0.9	0.07042	0.95	0.0804	111	0.03186	14.1611
88	0.05	-0.01122	0.1	-0.00153	0.125	0.00203	0.2	0.01063	0.25	0.01536	0.5	0.03444	0.75	0.05345	0.8	0.05809	0.875	0.06676	0.9	0.07042	0.95	0.0804	111	0.03186	14.1611
89	0.05	-0.01122	0.1	-0.00153	0.125	0.00203	0.2	0.01063	0.25	0.01536	0.5	0.03444	0.75	0.05345	0.8	0.05809	0.875	0.06676	0.9	0.07042	0.95	0.0804	111	0.03186	14.1611
90	0.05	-0.01122	0.1	-0.00153	0.125	0.00203	0.2	0.01063	0.25	0.01536	0.5	0.03444	0.75	0.05345	0.8	0.05809	0.875	0.06676	0.9	0.07042	0.95	0.0804	111	0.03186	14.1611
91	0.05	-0.01122	0.1	-0.00153	0.125	0.00203	0.2	0.01063	0.25	0.01536	0.5	0.03444	0.75	0.05345	0.8	0.05809	0.875	0.06676	0.9	0.07042	0.95	0.0804	111	0.03186	14.1611
92	0.05	-0.01122	0.1	-0.00153	0.125	0.00203	0.2	0.01063	0.25	0.01536	0.5	0.03444	0.75	0.05345	0.8	0.05809	0.875	0.06676	0.9	0.07042	0.95	0.0804	111	0.03186	14.1611
93	0.05	-0.01122	0.1	-0.00153	0.125	0.00203	0.2	0.01063	0.25	0.01536	0.5	0.03444	0.75	0.05345	0.8	0.05809	0.875	0.06676	0.9	0.07042	0.95	0.0804	111	0.03186	14.1611
94	0.05	-0.01122	0.1	-0.00153	0.125	0.00203	0.2	0.01063	0.25	0.01536	0.5	0.03444	0.75	0.05345	0.8	0.05809	0.875	0.06676	0.9	0.07042	0.95	0.0804	111	0.03186	14.1611
95	0.05	-0.01122	0.1	-0.00153	0.125	0.00203	0.2	0.01063	0.25	0.01536	0.5	0.03444	0.75	0.05345	0.8	0.05809	0.875	0.06676	0.9	0.07042	0.95	0.0804	111	0.03186	14.1611
96	0.05	-0.01122	0.1	-0.00153	0.125	0.00203	0.2	0.01063	0.25	0.01536	0.5	0.03444	0.75	0.05345	0.8	0.05809	0.875	0.06676	0.9	0.07042	0.95	0.0804	111	0.03186	14.1611
97	0.05	-0.01122	0.1	-0.00153	0.125	0.00203	0.2	0.01063	0.25	0.01536	0.5	0.03444	0.75	0.05345	0.8	0.05809	0.875	0.06676	0.9	0.07042	0.95	0.0804	111	0.03186	14.1611
98	0.05	-0.01122	0.1	-0.00153	0.125	0.00203	0.2	0.01063	0.25	0.01536	0.5	0.03444	0.75	0.05345	0.8	0.05809	0.875	0.06676	0.9	0.07042	0.95	0.0804	111	0.03186	14.1611
99	0.05	-0.01122	0.1	-0.00153	0.125	0.00203	0.2	0.01063	0.25	0.01536	0.5	0.03444	0.75	0.05345	0.8	0.05809	0.875	0.06676	0.9	0.07042	0.95	0.0804	111	0.03186	14.1611
100	0.05	-0.01122	0.1	-0.00153	0.125	0.00203	0.2	0.01063	0.25	0.01536	0.5	0.03444	0.75	0.05345	0.8	0.05809	0.875	0.06676	0.9	0.07042	0.95	0.0804	111	0.03186	14.1611
101	0.05	-0.01122	0.1	-0.00153	0.125	0.00203	0.2	0.01063	0.25	0.01536	0.5	0.03444	0.75	0.05345	0.8	0.05809	0.875	0.06676	0.9	0.07042	0.95	0.0804	111	0.03186	14.1611
102	0.05	-0.01122	0.1	-0.00153	0.125	0.00203	0.2	0.01063	0.25	0.01536	0.5	0.03444	0.75	0.05345	0.8	0.05809	0.875	0.06676	0.9	0.07042	0.95	0.0804	111	0.03186	14.1611
103	0.05	-0.01122	0.1	-0.00153	0.125	0.00203	0.2	0.01063	0.25	0.01536	0.5	0.03444	0.75	0.05345	0.8	0.05809	0.875	0.06676	0.9	0.07042	0.95	0.0804	111	0.03186	14.1611
104	0.05	-0.01122	0.1	-0.00153	0.125	0.00203	0.2	0.01063	0.25	0.01536	0.5	0.03444	0.75	0.05345	0.8	0.05809	0.875	0.06676	0.9	0.07042	0.95	0.0804	111	0.03186	14.1611
105	0.05	-0.01122	0.1	-0.00153	0.125	0.00203	0.2	0.01063	0.25	0.01536	0.5	0.03444	0.75	0.05345	0.8	0.05809	0.875	0.06676	0.9	0.07042	0.95	0.0804	111	0.03186	14.1611
106	0.05	-0.01122	0.1	-0.00153	0.125	0.00203	0.2	0.01063	0.25	0.01536	0.5	0.03444	0.75	0.05345	0.8	0.05809	0.875	0.06676	0.9	0.07042	0.95	0.0804	111	0.03186	14.1611
107	0.05	-0.01122	0.1	-0.00153	0.125	0.00203	0.2	0.01063	0.25	0.01536	0.5	0.03444	0.75	0.05345	0.8	0.05809	0.875	0.06676	0.9	0.07042	0.95	0.0804	111	0.03186	14.1611
108	0.05	-0.01122	0.1	-0.00153	0.125	0.00203	0.2	0.01063	0.25	0.01536	0.5	0.03444	0.75	0.05345	0.8	0.05809	0.875	0.06676	0.9	0.07042	0.95	0.0804	111	0.03186	14.1611
109	0.05	-0.01122	0.1	-0.00153	0.125	0.00203	0.2	0.01063	0.25	0.01536	0.5	0.03444	0.75	0.05345	0.8	0.05809	0.875	0.06676	0.9	0.07042	0.95	0.0804	111	0.03186	14.1611
110	0.05	-0.01122	0.1	-0.00153	0.125	0.00203	0.2	0.01063	0.25	0.01536	0.5	0.03444	0.75	0.05345	0.8	0.05809	0.875	0.06676	0.9	0.07042	0.95	0.0804	111	0.03186	14.1611
111	0.05	-0.01122	0.1	-0.00153	0.125	0.00203	0.2	0.01063	0.25	0.01536	0.5	0.03444	0.75	0.05345	0.8	0.05809	0.875	0.06676	0.9	0.07042	0.95	0.0804	111	0.03186	14.1611
112	0.05	-0.01122	0.1	-0.00153	0.125	0.00203	0.2	0.01063	0.25	0.01536	0.5	0.03444	0.75	0.05345	0.8	0.05809	0.875	0.06676	0.9	0.07042	0.95	0.0804	111	0.03186	14.1611
113	0.05	-0.01122	0.1	-0.00153	0.125	0.00203	0.2	0.01063	0.25	0.01536	0.5	0.03444	0.75	0.05345	0.8	0.05809	0.875	0.06676	0.9	0.07042	0.95	0.0804	111	0.03186	14.1611
114	0.05	-0.01122	0.1	-0.00153	0.125	0.00203	0.2	0.01063	0.25	0.01536	0.5	0.03444	0.75	0.05345	0.8	0.05809	0.875	0.06676	0.9	0.07042	0.95	0.0804	111	0.03186	14.1611
115	0.05	-0.01122	0.1	-0.00153	0.125	0.00203	0.2	0.01063	0.25	0.01536	0.5	0.03444	0.75	0.05345	0.8	0.05809	0.875	0.06676	0.9	0.07042	0.95	0.0804	111	0.03186	14.1611
116	0.05	-0.01122	0.1	-0.00153	0.125	0.00203	0.2	0.01063	0.25	0.01536	0.5	0.03444	0.75	0.05345	0.8	0.05809	0.875	0.06676	0.9	0.07042	0.95	0.0804	111	0.03186	14.1611
117	0.05	-0.01122	0.1	-0.00153	0.125	0.00203	0.2	0.01063	0.25	0.01536	0.5	0.03444	0.75	0.05345	0.8	0.05809	0.875	0.06676	0.9	0.07042	0.95	0.0804	111	0.03186	14.1611
118	0.05	-0.01122	0.1	-0.00153	0.125	0.00203	0.2	0.01063	0.25	0.01536	0.5	0.03444	0.75	0.05345	0.8	0.05809	0.875	0.06676	0.9	0.07042	0.95	0.0804	111	0.03186	14.1611
119	0.05	-0.01122	0.1	-0.00153	0.125	0.00203	0.2	0.01063	0.25	0.01536	0.5	0.03444	0.75	0.05345	0.8	0.05809	0.875	0.06676	0.9	0.07042	0.95	0.0804	111	0.03186	14.1611
120	0.05	-0.01122	0.1	-0.00153	0.125	0.00203	0.2	0.01063	0.25	0.01536	0.5	0.03444	0.75	0.05345	0.8	0.05809	0.875	0.06676	0.9	0.07042	0.95	0.0804	111	0.03186	14.1611
121	0.05	-0.01122	0.1	-0.00153	0.125	0.00203	0.2	0.01063	0.25	0.01536	0.5	0.03444	0.75	0.05345	0.8	0.05809	0.875	0.06676	0.9	0.07042	0.95	0.0804	111	0.03186	14.1611
122	0.05	-0.01122	0.1	-0.00153	0.125	0.00203	0.2	0.01063	0.25	0.01536	0.5	0.03444	0.75	0.05345	0.8	0.05809	0.875	0.06676	0.9	0.07042	0.95	0.0804	111	0.03186	14.1611
123	0.05	-0.01122	0.1	-0.00153	0.125	0.00203	0.2	0.01063	0.25	0.01536	0.5	0.03444	0.75	0.05345	0.8	0.05809	0.875	0.06676	0.9	0.07042	0.95	0.0804	111	0.03186	14.1611
124	0.05	-0.01122	0.1	-0.00153	0.125	0.00203	0.2	0.01063	0.25	0.01536	0.5	0.03444	0.75	0.05345	0.8	0.05809	0.875	0.06676	0.9	0.07042	0.95	0.0804	111	0.03186	14.1611
125	0.05	-0.01122	0.1	-0.00153	0.125	0.00203	0.2	0.01063	0.25	0.01536	0.5	0.03444	0.75	0.05345	0.8	0.05809	0.875	0.06676	0.9	0.07042	0.95	0.0804	111	0.03186	14.1611
126	0.05	-0.01122	0.1	-0.00153	0.125	0.00203	0.2	0.01063	0.25	0.01536	0.5	0.03444	0.75	0.05345	0.8	0.05809	0.875	0.06676	0.9	0.07042	0.95	0.0804	111	0.03186	14.1611
127	0.05	-0.01122	0.1	-0.00153	0.125	0.00203	0.2	0.01063	0.25	0.01536	0.5	0.03444	0.75	0.05345	0.8	0.05809	0.875	0.06676	0.9	0.07042	0.95	0.0804	111	0.03186	14.1611
128	0.05	-0.01122	0.1	-0.00153	0.125	0.00203	0.2	0.01063	0.25	0.01536	0.5	0.03444	0.75	0.05345	0.8	0.05809	0.875	0.06676	0.9	0.07042	0.95	0.0804	111	0.03186	14.1611
129	0.05	-0.01122	0.1	-0.00153	0.125	0.00203	0.2	0.01063	0.25	0.01536	0.5	0.03444	0.75	0.05345	0.8	0.05809	0.875	0.06676	0.9	0.07042	0.95	0.0804	111	0.03186	14.1611
130	0.05	-0.01122	0.1	-0.00153	0.125	0.00203	0.2	0.01063	0.25	0.01536	0.5	0.03444	0.75	0.05345	0.8	0.05809	0.875	0.06676	0.9	0.07042	0.95	0.0804	111	0.03186	14.1611
131	0.05	-0.01122	0.1	-0.00153	0.125	0.00203	0.2	0.01063	0.25	0.01536	0.5	0.03444	0.75	0.05345	0.8	0.05809	0.875	0.06676	0.9	0.07042	0.95	0.0804	111	0.03186	14.1611
132	0.05	-0.01122	0.1	-0.00153	0.125	0.00203	0.2	0.01063	0.25	0.01536	0.5	0.03444	0.75	0.05345	0.8	0.05809	0.875	0.06676	0.9	0.07042	0.95	0.0804	111	0.03186	14.1611
133	0.05	-0.01122	0.1	-0.00153	0.125	0.00203	0.2	0.01063	0.25	0.01536	0.5	0.03444	0.75	0.05345	0.8	0.05809	0.875	0.06676	0.9	0.07042	0.95	0.0804	111	0.03186	14.1611
134	0.05	-0.01122	0.1	-0.00153	0.125	0.00203	0.2	0.01063	0.25	0.01536	0.5	0.03444	0.75	0.05345	0.8	0.05809	0.875	0.06676	0.9	0.07042	0.95	0.0804	111	0.03186	14.1611
135	0.05	-0.01122	0.1	-0.00153	0.125	0.00203	0.2	0.01063	0.25	0.01536	0.5	0.03444	0.75	0.05345	0.8	0.05809	0.875	0.06676	0.9	0.07042	0.95	0.0804	111	0.03186	14.1611
136	0.05	-0.01122	0.1	-0.00153	0.125	0.00203	0.2	0.01063	0.25	0.01536	0.5	0.03444	0.75	0.05345	0.8	0.05809	0.875	0.06676	0.9	0.07042	0.95	0.0804	111	0.03186	14.1611
137	0.05	-0.01122	0.1	-0.00153	0.125	0.00203	0.2	0.01063	0.25	0.01536	0.5	0.03444	0.75	0.05345	0.8	0.05809	0.875	0.06676	0.9	0.07042	0.95	0.0804	111	0.03186	14.1611
138	0.05	-0.01122	0.1	-0.00153	0.125	0.00203	0.2	0.01063	0.25	0.01536	0.5	0.03444	0.75	0.05345	0.8	0.05809	0.875	0.06676	0.9	0.07042	0.95	0.0804	111	0.03186	14.1611
139	0.05	-0.01122	0.1	-0.00153	0.125	0.00203	0.2	0.01063	0.25	0.01536	0.5	0.03444	0.75	0.05345	0.8	0.05809	0.875	0.06676	0.9	0.07042	0.95	0.0804	111	0.03186	14.1611
140	0.05	-0.01122	0.1	-0.00153	0.125	0.00203	0.2	0.01063	0.25	0.01536	0.5	0.03444	0.75	0.05345	0.8	0.05809	0.875	0.06676	0.9	0.07042	0.95	0.0804	111	0.03186	14.1611
141	0.05	-0.01122	0.1	-0.00153	0.125	0.00203	0.2	0.01063	0.25	0.01536	0.5	0.03444	0.75	0.05345	0.8	0.05809	0.875	0.06676	0.9	0.07042	0.95	0.0804	111	0.03186	14.1611
142	0.05	-0.01122	0.1	-0.00153	0.125	0.00203	0.2	0.01063	0.25	0.01536	0.5	0.03444	0.75	0.05345	0.8	0.05809	0.875	0.06676	0.9	0.07042	0.95	0.0804	111	0.03186	14.1611
143	0.05	-0.01122	0.1	-0.00153	0.125	0.00203	0.2	0.01063	0.25	0.01536	0.5	0.03444	0.75	0.05345	0.8	0.05809	0.875	0.06676	0.9	0.07042	0.95	0.0804	111	0.03186	14.1611
144	0.05	-0.01122	0.1	-0.00153	0.125	0.00203	0.2	0.01063	0.25	0.01536	0.5	0.03444	0.75	0.05345	0.8	0.05809	0.875	0.06676	0.9	0.07042	0.95	0.0804	111	0.03186	14.1611
145	0.05	-0.01122	0.1	-0.00153	0.125	0.00203	0.2	0.01063	0.25	0.01536	0.5	0.03444	0.75	0.05345	0.8	0.05809	0.875	0.06676	0.9	0.07042	0.95	0.0804	111	0.03186	14.1611
146	0.05	-0.01122	0.1	-0.00153	0.125	0.00203	0.2	0.01063	0.25	0.01536	0.5	0.03444	0.75	0.05345	0.8	0.05809	0.875	0.06676	0.9	0.07042	0.95	0.0804	111	0.03186	14.1611
147	0.05	-0.01122	0.1	-0.00153	0.125	0.00203	0.2	0.01063	0.25	0.01536	0.5	0.03444	0.75	0.05345	0.8	0.05809	0.875	0.06676	0.9	0.07042	0.95	0.0804	111	0.03186	14.1611
148	0.05	-0.01122	0.1	-0.00153	0.125	0.00203	0.2	0.01063	0.25	0.01536	0.5	0.03444	0.75	0.05345	0.8	0.05809	0.875	0.06676	0.9	0.07042	0.95	0.0804	111	0.03186	14.1611
149	0.05	-0.01122	0.1	-0.00153	0.125	0.00203	0.2	0.01063	0.25	0.01536	0.5	0.03444	0.75	0.05345	0.8	0.05809	0.875	0.06676	0.9	0.07042	0.95	0.0804	111	0.03186	14.1611
150	0.05	-0.01122	0.1	-0.00153	0.125	0.00203	0.2	0.01063	0.25	0.01536	0.5	0.03444	0.75	0.05345	0.8	0.05809	0.875	0.06676	0.9	0.07042	0.95	0.0804	111	0.03186	14.1611
151	0.05	-0.01122	0.1	-0.00153	0.125	0.00203	0.2	0.01063	0.25	0.01536	0.5	0.03444	0.75	0.05345	0.8	0.05809	0.875	0.06676	0.9	0.07042	0.95	0.0804	111	0.03186	14.1611
152	0.05	-0.01122	0.1	-0.00153	0.125	0.00203	0.2	0.01063	0.25	0.01536	0.5	0.03444	0.75	0.05345	0.8	0.05809	0.875	0.06676	0.9	0.07042	0.95	0.0804	111	0.03186	14.1611
153	0.05	-0.01122	0.1	-0.00153	0.125	0.00203	0.2	0.01063	0.25	0.01536	0.5	0.03444	0.75	0.05345	0.8	0.05809	0.875	0.06676	0.9	0.07042	0.95	0.0804	111	0.03186	14.1611
154	0.05	-0.01122	0.1	-0.00153	0.125	0.00203	0.2	0.01063	0.25	0.01536	0.5	0.03444	0.75	0.05345	0.8	0.05809	0.875	0.06676	0.9	0.07042	0.95	0.0804	111	0.03186	14.1611
155	0.05	-0.01122	0.1	-0.00153	0.125	0.00203	0.2	0.01063	0.25	0.01536	0.5	0.03444	0.75	0.05345	0.8	0.05809	0.875	0.06676	0.9	0.07042	0.95	0.0804	111	0.03186	14.1611
156	0.05	-0.01122	0.1	-0.00153	0.125	0.00203	0.2	0.01063	0.25	0.01536	0.5	0.03444	0.75	0.05345	0.8	0.05809	0.875	0.06676	0.9	0.07042	0.95	0.0804	111	0.03186	14.1611
157	0.05	-0.01122	0.1	-0.00153	0.125	0.00203	0.2	0.01063	0.25	0.01536	0.5	0.03444	0.75	0.05345	0.8	0.05809	0.875	0.06676	0.9	0.07042	0.95	0.0804	111	0.03186	14.1611
158	0.05	-0.01122	0.1	-0.00153	0.125	0.00203	0.2	0.01063	0.25	0.01536	0.5	0.03444	0.75	0.05345	0.8	0.05809	0.875	0.06676	0.9	0.07042	0.95	0.0804	111	0.03186	14.1611
