# Supplementary material for: Time-varying asymmetry and tail thickness in long series of daily financial returns
Source: publisher site journal article supplement (doi:10.1515/snde-2017-0071), 2018-10-02
Supplement: Supplementary file 193 [file thres_ni1.xlsx]

## Sheet: 1
	Var1	Var2	Var3	Var4	Var5	Var6	Var7	Var8	Var9	Var10	Var11	Var12	Var13	Var14	Var15	Var16	Var17	Var18	Var19	Var20	Var21	Var22	Var23	Var24	Var25
1	0	0	0	0	0	0	0	0	0	0	0	0	0	0	0	0	0	0	0	0	0	0	0	0	0
2	0.05	5.7362	0.1	5.8365	0.125	5.8739	0.2	5.9627	0.25	6.0107	0.5	6.2105	0.75	6.4215	0.8	6.4756	0.875	6.5749	0.9	6.6184	0.95	6.7423	111	6.1943	1.31877
3	0.05	5.7362	0.1	5.8365	0.125	5.8739	0.2	5.9627	0.25	6.0107	0.5	6.2105	0.75	6.4215	0.8	6.4756	0.875	6.5749	0.9	6.6184	0.95	6.7423	111	6.1943	1.31877
4	0.05	5.7362	0.1	5.8365	0.125	5.8739	0.2	5.9627	0.25	6.0107	0.5	6.2105	0.75	6.4215	0.8	6.4756	0.875	6.5749	0.9	6.6184	0.95	6.7423	111	6.1943	1.31877
5	0.05	5.7362	0.1	5.8365	0.125	5.8739	0.2	5.9627	0.25	6.0107	0.5	6.2105	0.75	6.4215	0.8	6.4756	0.875	6.5749	0.9	6.6184	0.95	6.7423	111	6.1943	1.31877
6	0.05	5.7362	0.1	5.8365	0.125	5.8739	0.2	5.9627	0.25	6.0107	0.5	6.2105	0.75	6.4215	0.8	6.4756	0.875	6.5749	0.9	6.6184	0.95	6.7423	111	6.1943	1.31877
7	0.05	5.7362	0.1	5.8365	0.125	5.8739	0.2	5.9627	0.25	6.0107	0.5	6.2105	0.75	6.4215	0.8	6.4756	0.875	6.5749	0.9	6.6184	0.95	6.7423	111	6.1943	1.31877
8	0.05	5.7362	0.1	5.8365	0.125	5.8739	0.2	5.9627	0.25	6.0107	0.5	6.2105	0.75	6.4215	0.8	6.4756	0.875	6.5749	0.9	6.6184	0.95	6.7423	111	6.1943	1.31877
9	0.05	5.7362	0.1	5.8365	0.125	5.8739	0.2	5.9627	0.25	6.0107	0.5	6.2105	0.75	6.4215	0.8	6.4756	0.875	6.5749	0.9	6.6184	0.95	6.7423	111	6.1943	1.31877
10	0.05	5.7362	0.1	5.8365	0.125	5.8739	0.2	5.9627	0.25	6.0107	0.5	6.2105	0.75	6.4215	0.8	6.4756	0.875	6.5749	0.9	6.6184	0.95	6.7423	111	6.1943	1.31877
11	0.05	5.7362	0.1	5.8365	0.125	5.8739	0.2	5.9627	0.25	6.0107	0.5	6.2105	0.75	6.4215	0.8	6.4756	0.875	6.5749	0.9	6.6184	0.95	6.7423	111	6.1943	1.31877
12	0.05	5.7362	0.1	5.8365	0.125	5.8739	0.2	5.9627	0.25	6.0107	0.5	6.2105	0.75	6.4215	0.8	6.4756	0.875	6.5749	0.9	6.6184	0.95	6.7423	111	6.1943	1.31877
13	0.05	5.7362	0.1	5.8365	0.125	5.8739	0.2	5.9627	0.25	6.0107	0.5	6.2105	0.75	6.4215	0.8	6.4756	0.875	6.5749	0.9	6.6184	0.95	6.7423	111	6.1943	1.31877
14	0.05	5.7362	0.1	5.8365	0.125	5.8739	0.2	5.9627	0.25	6.0107	0.5	6.2105	0.75	6.4215	0.8	6.4756	0.875	6.5749	0.9	6.6184	0.95	6.7423	111	6.1943	1.31877
15	0.05	5.7362	0.1	5.8365	0.125	5.8739	0.2	5.9627	0.25	6.0107	0.5	6.2105	0.75	6.4215	0.8	6.4756	0.875	6.5749	0.9	6.6184	0.95	6.7423	111	6.1943	1.31877
16	0.05	5.7362	0.1	5.8365	0.125	5.8739	0.2	5.9627	0.25	6.0107	0.5	6.2105	0.75	6.4215	0.8	6.4756	0.875	6.5749	0.9	6.6184	0.95	6.7423	111	6.1943	1.31877
17	0.05	5.7362	0.1	5.8365	0.125	5.8739	0.2	5.9627	0.25	6.0107	0.5	6.2105	0.75	6.4215	0.8	6.4756	0.875	6.5749	0.9	6.6184	0.95	6.7423	111	6.1943	1.31877
18	0.05	5.7362	0.1	5.8365	0.125	5.8739	0.2	5.9627	0.25	6.0107	0.5	6.2105	0.75	6.4215	0.8	6.4756	0.875	6.5749	0.9	6.6184	0.95	6.7423	111	6.1943	1.31877
19	0.05	5.7362	0.1	5.8365	0.125	5.8739	0.2	5.9627	0.25	6.0107	0.5	6.2105	0.75	6.4215	0.8	6.4756	0.875	6.5749	0.9	6.6184	0.95	6.7423	111	6.1943	1.31877
20	0.05	5.7362	0.1	5.8365	0.125	5.8739	0.2	5.9627	0.25	6.0107	0.5	6.2105	0.75	6.4215	0.8	6.4756	0.875	6.5749	0.9	6.6184	0.95	6.7423	111	6.1943	1.31877
21	0.05	5.7362	0.1	5.8365	0.125	5.8739	0.2	5.9627	0.25	6.0107	0.5	6.2105	0.75	6.4215	0.8	6.4756	0.875	6.5749	0.9	6.6184	0.95	6.7423	111	6.1943	1.31877
22	0.05	5.7362	0.1	5.8365	0.125	5.8739	0.2	5.9627	0.25	6.0107	0.5	6.2105	0.75	6.4215	0.8	6.4756	0.875	6.5749	0.9	6.6184	0.95	6.7423	111	6.1943	1.31877
23	0.05	5.7362	0.1	5.8365	0.125	5.8739	0.2	5.9627	0.25	6.0107	0.5	6.2105	0.75	6.4215	0.8	6.4756	0.875	6.5749	0.9	6.6184	0.95	6.7423	111	6.1943	1.31877
24	0.05	5.7362	0.1	5.8365	0.125	5.8739	0.2	5.9627	0.25	6.0107	0.5	6.2105	0.75	6.4215	0.8	6.4756	0.875	6.5749	0.9	6.6184	0.95	6.7423	111	6.1943	1.31877
25	0.05	5.7362	0.1	5.8365	0.125	5.8739	0.2	5.9627	0.25	6.0107	0.5	6.2105	0.75	6.4215	0.8	6.4756	0.875	6.5749	0.9	6.6184	0.95	6.7423	111	6.1943	1.31877
26	0.05	5.7362	0.1	5.8365	0.125	5.8739	0.2	5.9627	0.25	6.0107	0.5	6.2105	0.75	6.4215	0.8	6.4756	0.875	6.5749	0.9	6.6184	0.95	6.7423	111	6.1943	1.31877
27	0.05	5.7362	0.1	5.8365	0.125	5.8739	0.2	5.9627	0.25	6.0107	0.5	6.2105	0.75	6.4215	0.8	6.4756	0.875	6.5749	0.9	6.6184	0.95	6.7423	111	6.1943	1.31877
28	0.05	5.7362	0.1	5.8365	0.125	5.8739	0.2	5.9627	0.25	6.0107	0.5	6.2105	0.75	6.4215	0.8	6.4756	0.875	6.5749	0.9	6.6184	0.95	6.7423	111	6.1943	1.31877
29	0.05	5.7362	0.1	5.8365	0.125	5.8739	0.2	5.9627	0.25	6.0107	0.5	6.2105	0.75	6.4215	0.8	6.4756	0.875	6.5749	0.9	6.6184	0.95	6.7423	111	6.1943	1.31877
30	0.05	5.7362	0.1	5.8365	0.125	5.8739	0.2	5.9627	0.25	6.0107	0.5	6.2105	0.75	6.4215	0.8	6.4756	0.875	6.5749	0.9	6.6184	0.95	6.7423	111	6.1943	1.31877
31	0.05	5.7362	0.1	5.8365	0.125	5.8739	0.2	5.9627	0.25	6.0107	0.5	6.2105	0.75	6.4215	0.8	6.4756	0.875	6.5749	0.9	6.6184	0.95	6.7423	111	6.1943	1.31877
32	0.05	5.7362	0.1	5.8365	0.125	5.8739	0.2	5.9627	0.25	6.0107	0.5	6.2105	0.75	6.4215	0.8	6.4756	0.875	6.5749	0.9	6.6184	0.95	6.7423	111	6.1943	1.31877
33	0.05	5.7362	0.1	5.8365	0.125	5.8739	0.2	5.9627	0.25	6.0107	0.5	6.2105	0.75	6.4215	0.8	6.4756	0.875	6.5749	0.9	6.6184	0.95	6.7423	111	6.1943	1.31877
34	0.05	5.7362	0.1	5.8365	0.125	5.8739	0.2	5.9627	0.25	6.0107	0.5	6.2105	0.75	6.4215	0.8	6.4756	0.875	6.5749	0.9	6.6184	0.95	6.7423	111	6.1943	1.31877
35	0.05	5.7362	0.1	5.8365	0.125	5.8739	0.2	5.9627	0.25	6.0107	0.5	6.2105	0.75	6.4215	0.8	6.4756	0.875	6.5749	0.9	6.6184	0.95	6.7423	111	6.1943	1.31877
36	0.05	5.7362	0.1	5.8365	0.125	5.8739	0.2	5.9627	0.25	6.0107	0.5	6.2105	0.75	6.4215	0.8	6.4756	0.875	6.5749	0.9	6.6184	0.95	6.7423	111	6.1943	1.31877
37	0.05	5.7362	0.1	5.8365	0.125	5.8739	0.2	5.9627	0.25	6.0107	0.5	6.2105	0.75	6.4215	0.8	6.4756	0.875	6.5749	0.9	6.6184	0.95	6.7423	111	6.1943	1.31877
38	0.05	5.7362	0.1	5.8365	0.125	5.8739	0.2	5.9627	0.25	6.0107	0.5	6.2105	0.75	6.4215	0.8	6.4756	0.875	6.5749	0.9	6.6184	0.95	6.7423	111	6.1943	1.31877
39	0.05	5.7362	0.1	5.8365	0.125	5.8739	0.2	5.9627	0.25	6.0107	0.5	6.2105	0.75	6.4215	0.8	6.4756	0.875	6.5749	0.9	6.6184	0.95	6.7423	111	6.1943	1.31877
40	0.05	5.7362	0.1	5.8365	0.125	5.8739	0.2	5.9627	0.25	6.0107	0.5	6.2105	0.75	6.4215	0.8	6.4756	0.875	6.5749	0.9	6.6184	0.95	6.7423	111	6.1943	1.31877
41	0.05	5.7362	0.1	5.8365	0.125	5.8739	0.2	5.9627	0.25	6.0107	0.5	6.2105	0.75	6.4215	0.8	6.4756	0.875	6.5749	0.9	6.6184	0.95	6.7423	111	6.1943	1.31877
42	0.05	5.7362	0.1	5.8365	0.125	5.8739	0.2	5.9627	0.25	6.0107	0.5	6.2105	0.75	6.4215	0.8	6.4756	0.875	6.5749	0.9	6.6184	0.95	6.7423	111	6.1943	1.31877
43	0.05	5.7362	0.1	5.8365	0.125	5.8739	0.2	5.9627	0.25	6.0107	0.5	6.2105	0.75	6.4215	0.8	6.4756	0.875	6.5749	0.9	6.6184	0.95	6.7423	111	6.1943	1.31877
44	0.05	5.7362	0.1	5.8365	0.125	5.8739	0.2	5.9627	0.25	6.0107	0.5	6.2105	0.75	6.4215	0.8	6.4756	0.875	6.5749	0.9	6.6184	0.95	6.7423	111	6.1943	1.31877
45	0.05	5.7362	0.1	5.8365	0.125	5.8739	0.2	5.9627	0.25	6.0107	0.5	6.2105	0.75	6.4215	0.8	6.4756	0.875	6.5749	0.9	6.6184	0.95	6.7423	111	6.1943	1.31877
46	0.05	5.7362	0.1	5.8365	0.125	5.8739	0.2	5.9627	0.25	6.0107	0.5	6.2105	0.75	6.4215	0.8	6.4756	0.875	6.5749	0.9	6.6184	0.95	6.7423	111	6.1943	1.31877
47	0.05	5.7362	0.1	5.8365	0.125	5.8739	0.2	5.9627	0.25	6.0107	0.5	6.2105	0.75	6.4215	0.8	6.4756	0.875	6.5749	0.9	6.6184	0.95	6.7423	111	6.1943	1.31877
48	0.05	5.7362	0.1	5.8365	0.125	5.8739	0.2	5.9627	0.25	6.0107	0.5	6.2105	0.75	6.4215	0.8	6.4756	0.875	6.5749	0.9	6.6184	0.95	6.7423	111	6.1943	1.31877
49	0.05	5.7362	0.1	5.8365	0.125	5.8739	0.2	5.9627	0.25	6.0107	0.5	6.2105	0.75	6.4215	0.8	6.4756	0.875	6.5749	0.9	6.6184	0.95	6.7423	111	6.1943	1.31877
50	0.05	5.7362	0.1	5.8365	0.125	5.8739	0.2	5.9627	0.25	6.0107	0.5	6.2105	0.75	6.4215	0.8	6.4756	0.875	6.5749	0.9	6.6184	0.95	6.7423	111	6.1943	1.31877
51	0.05	5.7362	0.1	5.8365	0.125	5.8739	0.2	5.9627	0.25	6.0107	0.5	6.2105	0.75	6.4215	0.8	6.4756	0.875	6.5749	0.9	6.6184	0.95	6.7423	111	6.1943	1.31877
52	0.05	5.7362	0.1	5.8365	0.125	5.8739	0.2	5.9627	0.25	6.0107	0.5	6.2105	0.75	6.4215	0.8	6.4756	0.875	6.5749	0.9	6.6184	0.95	6.7423	111	6.1943	1.31877
53	0.05	5.7362	0.1	5.8365	0.125	5.8739	0.2	5.9627	0.25	6.0107	0.5	6.2105	0.75	6.4215	0.8	6.4756	0.875	6.5749	0.9	6.6184	0.95	6.7423	111	6.1943	1.31877
54	0.05	5.7362	0.1	5.8365	0.125	5.8739	0.2	5.9627	0.25	6.0107	0.5	6.2105	0.75	6.4215	0.8	6.4756	0.875	6.5749	0.9	6.6184	0.95	6.7423	111	6.1943	1.31877
55	0.05	5.7362	0.1	5.8365	0.125	5.8739	0.2	5.9627	0.25	6.0107	0.5	6.2105	0.75	6.4215	0.8	6.4756	0.875	6.5749	0.9	6.6184	0.95	6.7423	111	6.1943	1.31877
56	0.05	5.7362	0.1	5.8365	0.125	5.8739	0.2	5.9627	0.25	6.0107	0.5	6.2105	0.75	6.4215	0.8	6.4756	0.875	6.5749	0.9	6.6184	0.95	6.7423	111	6.1943	1.31877
57	0.05	5.7362	0.1	5.8365	0.125	5.8739	0.2	5.9627	0.25	6.0107	0.5	6.2105	0.75	6.4215	0.8	6.4756	0.875	6.5749	0.9	6.6184	0.95	6.7423	111	6.1943	1.31877
58	0.05	5.7362	0.1	5.8365	0.125	5.8739	0.2	5.9627	0.25	6.0107	0.5	6.2105	0.75	6.4215	0.8	6.4756	0.875	6.5749	0.9	6.6184	0.95	6.7423	111	6.1943	1.31877
59	0.05	5.7362	0.1	5.8365	0.125	5.8739	0.2	5.9627	0.25	6.0107	0.5	6.2105	0.75	6.4215	0.8	6.4756	0.875	6.5749	0.9	6.6184	0.95	6.7423	111	6.1943	1.31877
60	0.05	5.7362	0.1	5.8365	0.125	5.8739	0.2	5.9627	0.25	6.0107	0.5	6.2105	0.75	6.4215	0.8	6.4756	0.875	6.5749	0.9	6.6184	0.95	6.7423	111	6.1943	1.31877
61	0.05	5.7362	0.1	5.8365	0.125	5.8739	0.2	5.9627	0.25	6.0107	0.5	6.2105	0.75	6.4215	0.8	6.4756	0.875	6.5749	0.9	6.6184	0.95	6.7423	111	6.1943	1.31877
62	0.05	5.7362	0.1	5.8365	0.125	5.8739	0.2	5.9627	0.25	6.0107	0.5	6.2105	0.75	6.4215	0.8	6.4756	0.875	6.5749	0.9	6.6184	0.95	6.7423	111	6.1943	1.31877
63	0.05	5.7362	0.1	5.8365	0.125	5.8739	0.2	5.9627	0.25	6.0107	0.5	6.2105	0.75	6.4215	0.8	6.4756	0.875	6.5749	0.9	6.6184	0.95	6.7423	111	6.1943	1.31877
64	0.05	5.7362	0.1	5.8365	0.125	5.8739	0.2	5.9627	0.25	6.0107	0.5	6.2105	0.75	6.4215	0.8	6.4756	0.875	6.5749	0.9	6.6184	0.95	6.7423	111	6.1943	1.31877
65	0.05	5.7362	0.1	5.8365	0.125	5.8739	0.2	5.9627	0.25	6.0107	0.5	6.2105	0.75	6.4215	0.8	6.4756	0.875	6.5749	0.9	6.6184	0.95	6.7423	111	6.1943	1.31877
66	0.05	5.7362	0.1	5.8365	0.125	5.8739	0.2	5.9627	0.25	6.0107	0.5	6.2105	0.75	6.4215	0.8	6.4756	0.875	6.5749	0.9	6.6184	0.95	6.7423	111	6.1943	1.31877
67	0.05	5.7362	0.1	5.8365	0.125	5.8739	0.2	5.9627	0.25	6.0107	0.5	6.2105	0.75	6.4215	0.8	6.4756	0.875	6.5749	0.9	6.6184	0.95	6.7423	111	6.1943	1.31877
68	0.05	5.7362	0.1	5.8365	0.125	5.8739	0.2	5.9627	0.25	6.0107	0.5	6.2105	0.75	6.4215	0.8	6.4756	0.875	6.5749	0.9	6.6184	0.95	6.7423	111	6.1943	1.31877
69	0.05	5.7362	0.1	5.8365	0.125	5.8739	0.2	5.9627	0.25	6.0107	0.5	6.2105	0.75	6.4215	0.8	6.4756	0.875	6.5749	0.9	6.6184	0.95	6.7423	111	6.1943	1.31877
70	0.05	5.7362	0.1	5.8365	0.125	5.8739	0.2	5.9627	0.25	6.0107	0.5	6.2105	0.75	6.4215	0.8	6.4756	0.875	6.5749	0.9	6.6184	0.95	6.7423	111	6.1943	1.31877
71	0.05	5.7362	0.1	5.8365	0.125	5.8739	0.2	5.9627	0.25	6.0107	0.5	6.2105	0.75	6.4215	0.8	6.4756	0.875	6.5749	0.9	6.6184	0.95	6.7423	111	6.1943	1.31877
72	0.05	5.7362	0.1	5.8365	0.125	5.8739	0.2	5.9627	0.25	6.0107	0.5	6.2105	0.75	6.4215	0.8	6.4756	0.875	6.5749	0.9	6.6184	0.95	6.7423	111	6.1943	1.31877
73	0.05	5.7362	0.1	5.8365	0.125	5.8739	0.2	5.9627	0.25	6.0107	0.5	6.2105	0.75	6.4215	0.8	6.4756	0.875	6.5749	0.9	6.6184	0.95	6.7423	111	6.1943	1.31877
74	0.05	5.7362	0.1	5.8365	0.125	5.8739	0.2	5.9627	0.25	6.0107	0.5	6.2105	0.75	6.4215	0.8	6.4756	0.875	6.5749	0.9	6.6184	0.95	6.7423	111	6.1943	1.31877
75	0.05	5.7362	0.1	5.8365	0.125	5.8739	0.2	5.9627	0.25	6.0107	0.5	6.2105	0.75	6.4215	0.8	6.4756	0.875	6.5749	0.9	6.6184	0.95	6.7423	111	6.1943	1.31877
76	0.05	5.7362	0.1	5.8365	0.125	5.8739	0.2	5.9627	0.25	6.0107	0.5	6.2105	0.75	6.4215	0.8	6.4756	0.875	6.5749	0.9	6.6184	0.95	6.7423	111	6.1943	1.31877
77	0.05	5.7362	0.1	5.8365	0.125	5.8739	0.2	5.9627	0.25	6.0107	0.5	6.2105	0.75	6.4215	0.8	6.4756	0.875	6.5749	0.9	6.6184	0.95	6.7423	111	6.1943	1.31877
78	0.05	5.7362	0.1	5.8365	0.125	5.8739	0.2	5.9627	0.25	6.0107	0.5	6.2105	0.75	6.4215	0.8	6.4756	0.875	6.5749	0.9	6.6184	0.95	6.7423	111	6.1943	1.31877
79	0.05	5.7362	0.1	5.8365	0.125	5.8739	0.2	5.9627	0.25	6.0107	0.5	6.2105	0.75	6.4215	0.8	6.4756	0.875	6.5749	0.9	6.6184	0.95	6.7423	111	6.1943	1.31877
80	0.05	5.7362	0.1	5.8365	0.125	5.8739	0.2	5.9627	0.25	6.0107	0.5	6.2105	0.75	6.4215	0.8	6.4756	0.875	6.5749	0.9	6.6184	0.95	6.7423	111	6.1943	1.31877
81	0.05	5.7362	0.1	5.8365	0.125	5.8739	0.2	5.9627	0.25	6.0107	0.5	6.2105	0.75	6.4215	0.8	6.4756	0.875	6.5749	0.9	6.6184	0.95	6.7423	111	6.1943	1.31877
82	0.05	5.7362	0.1	5.8365	0.125	5.8739	0.2	5.9627	0.25	6.0107	0.5	6.2105	0.75	6.4215	0.8	6.4756	0.875	6.5749	0.9	6.6184	0.95	6.7423	111	6.1943	1.31877
83	0.05	5.7362	0.1	5.8365	0.125	5.8739	0.2	5.9627	0.25	6.0107	0.5	6.2105	0.75	6.4215	0.8	6.4756	0.875	6.5749	0.9	6.6184	0.95	6.7423	111	6.1943	1.31877
84	0.05	5.7362	0.1	5.8365	0.125	5.8739	0.2	5.9627	0.25	6.0107	0.5	6.2105	0.75	6.4215	0.8	6.4756	0.875	6.5749	0.9	6.6184	0.95	6.7423	111	6.1943	1.31877
85	0.05	5.7362	0.1	5.8365	0.125	5.8739	0.2	5.9627	0.25	6.0107	0.5	6.2105	0.75	6.4215	0.8	6.4756	0.875	6.5749	0.9	6.6184	0.95	6.7423	111	6.1943	1.31877
86	0.05	5.7362	0.1	5.8365	0.125	5.8739	0.2	5.9627	0.25	6.0107	0.5	6.2105	0.75	6.4215	0.8	6.4756	0.875	6.5749	0.9	6.6184	0.95	6.7423	111	6.1943	1.31877
87	0.05	5.7362	0.1	5.8365	0.125	5.8739	0.2	5.9627	0.25	6.0107	0.5	6.2105	0.75	6.4215	0.8	6.4756	0.875	6.5749	0.9	6.6184	0.95	6.7423	111	6.1943	1.31877
88	0.05	5.7362	0.1	5.8365	0.125	5.8739	0.2	5.9627	0.25	6.0107	0.5	6.2105	0.75	6.4215	0.8	6.4756	0.875	6.5749	0.9	6.6184	0.95	6.7423	111	6.1943	1.31877
89	0.05	5.7362	0.1	5.8365	0.125	5.8739	0.2	5.9627	0.25	6.0107	0.5	6.2105	0.75	6.4215	0.8	6.4756	0.875	6.5749	0.9	6.6184	0.95	6.7423	111	6.1943	1.31877
90	0.05	5.7362	0.1	5.8365	0.125	5.8739	0.2	5.9627	0.25	6.0107	0.5	6.2105	0.75	6.4215	0.8	6.4756	0.875	6.5749	0.9	6.6184	0.95	6.7423	111	6.1943	1.31877
91	0.05	5.7362	0.1	5.8365	0.125	5.8739	0.2	5.9627	0.25	6.0107	0.5	6.2105	0.75	6.4215	0.8	6.4756	0.875	6.5749	0.9	6.6184	0.95	6.7423	111	6.1943	1.31877
92	0.05	5.7362	0.1	5.8365	0.125	5.8739	0.2	5.9627	0.25	6.0107	0.5	6.2105	0.75	6.4215	0.8	6.4756	0.875	6.5749	0.9	6.6184	0.95	6.7423	111	6.1943	1.31877
93	0.05	5.7362	0.1	5.8365	0.125	5.8739	0.2	5.9627	0.25	6.0107	0.5	6.2105	0.75	6.4215	0.8	6.4756	0.875	6.5749	0.9	6.6184	0.95	6.7423	111	6.1943	1.31877
94	0.05	5.7362	0.1	5.8365	0.125	5.8739	0.2	5.9627	0.25	6.0107	0.5	6.2105	0.75	6.4215	0.8	6.4756	0.875	6.5749	0.9	6.6184	0.95	6.7423	111	6.1943	1.31877
95	0.05	5.7362	0.1	5.8365	0.125	5.8739	0.2	5.9627	0.25	6.0107	0.5	6.2105	0.75	6.4215	0.8	6.4756	0.875	6.5749	0.9	6.6184	0.95	6.7423	111	6.1943	1.31877
96	0.05	5.7362	0.1	5.8365	0.125	5.8739	0.2	5.9627	0.25	6.0107	0.5	6.2105	0.75	6.4215	0.8	6.4756	0.875	6.5749	0.9	6.6184	0.95	6.7423	111	6.1943	1.31877
97	0.05	5.7362	0.1	5.8365	0.125	5.8739	0.2	5.9627	0.25	6.0107	0.5	6.2105	0.75	6.4215	0.8	6.4756	0.875	6.5749	0.9	6.6184	0.95	6.7423	111	6.1943	1.31877
98	0.05	5.7362	0.1	5.8365	0.125	5.8739	0.2	5.9627	0.25	6.0107	0.5	6.2105	0.75	6.4215	0.8	6.4756	0.875	6.5749	0.9	6.6184	0.95	6.7423	111	6.1943	1.31877
99	0.05	5.7362	0.1	5.8365	0.125	5.8739	0.2	5.9627	0.25	6.0107	0.5	6.2105	0.75	6.4215	0.8	6.4756	0.875	6.5749	0.9	6.6184	0.95	6.7423	111	6.1943	1.31877
100	0.05	5.7362	0.1	5.8365	0.125	5.8739	0.2	5.9627	0.25	6.0107	0.5	6.2105	0.75	6.4215	0.8	6.4756	0.875	6.5749	0.9	6.6184	0.95	6.7423	111	6.1943	1.31877
101	0.05	5.7362	0.1	5.8365	0.125	5.8739	0.2	5.9627	0.25	6.0107	0.5	6.2105	0.75	6.4215	0.8	6.4756	0.875	6.5749	0.9	6.6184	0.95	6.7423	111	6.1943	1.31877
102	0.05	5.7362	0.1	5.8365	0.125	5.8739	0.2	5.9627	0.25	6.0107	0.5	6.2105	0.75	6.4215	0.8	6.4756	0.875	6.5749	0.9	6.6184	0.95	6.7423	111	6.1943	1.31877
103	0.05	5.7362	0.1	5.8365	0.125	5.8739	0.2	5.9627	0.25	6.0107	0.5	6.2105	0.75	6.4215	0.8	6.4756	0.875	6.5749	0.9	6.6184	0.95	6.7423	111	6.1943	1.31877
104	0.05	5.7362	0.1	5.8365	0.125	5.8739	0.2	5.9627	0.25	6.0107	0.5	6.2105	0.75	6.4215	0.8	6.4756	0.875	6.5749	0.9	6.6184	0.95	6.7423	111	6.1943	1.31877
105	0.05	5.7362	0.1	5.8365	0.125	5.8739	0.2	5.9627	0.25	6.0107	0.5	6.2105	0.75	6.4215	0.8	6.4756	0.875	6.5749	0.9	6.6184	0.95	6.7423	111	6.1943	1.31877
106	0.05	5.7362	0.1	5.8365	0.125	5.8739	0.2	5.9627	0.25	6.0107	0.5	6.2105	0.75	6.4215	0.8	6.4756	0.875	6.5749	0.9	6.6184	0.95	6.7423	111	6.1943	1.31877
107	0.05	5.7362	0.1	5.8365	0.125	5.8739	0.2	5.9627	0.25	6.0107	0.5	6.2105	0.75	6.4215	0.8	6.4756	0.875	6.5749	0.9	6.6184	0.95	6.7423	111	6.1943	1.31877
108	0.05	5.7362	0.1	5.8365	0.125	5.8739	0.2	5.9627	0.25	6.0107	0.5	6.2105	0.75	6.4215	0.8	6.4756	0.875	6.5749	0.9	6.6184	0.95	6.7423	111	6.1943	1.31877
109	0.05	5.7362	0.1	5.8365	0.125	5.8739	0.2	5.9627	0.25	6.0107	0.5	6.2105	0.75	6.4215	0.8	6.4756	0.875	6.5749	0.9	6.6184	0.95	6.7423	111	6.1943	1.31877
110	0.05	5.7362	0.1	5.8365	0.125	5.8739	0.2	5.9627	0.25	6.0107	0.5	6.2105	0.75	6.4215	0.8	6.4756	0.875	6.5749	0.9	6.6184	0.95	6.7423	111	6.1943	1.31877
111	0.05	5.7362	0.1	5.8365	0.125	5.8739	0.2	5.9627	0.25	6.0107	0.5	6.2105	0.75	6.4215	0.8	6.4756	0.875	6.5749	0.9	6.6184	0.95	6.7423	111	6.1943	1.31877
112	0.05	5.7362	0.1	5.8365	0.125	5.8739	0.2	5.9627	0.25	6.0107	0.5	6.2105	0.75	6.4215	0.8	6.4756	0.875	6.5749	0.9	6.6184	0.95	6.7423	111	6.1943	1.31877
113	0.05	5.7362	0.1	5.8365	0.125	5.8739	0.2	5.9627	0.25	6.0107	0.5	6.2105	0.75	6.4215	0.8	6.4756	0.875	6.5749	0.9	6.6184	0.95	6.7423	111	6.1943	1.31877
114	0.05	5.7362	0.1	5.8365	0.125	5.8739	0.2	5.9627	0.25	6.0107	0.5	6.2105	0.75	6.4215	0.8	6.4756	0.875	6.5749	0.9	6.6184	0.95	6.7423	111	6.1943	1.31877
115	0.05	5.7362	0.1	5.8365	0.125	5.8739	0.2	5.9627	0.25	6.0107	0.5	6.2105	0.75	6.4215	0.8	6.4756	0.875	6.5749	0.9	6.6184	0.95	6.7423	111	6.1943	1.31877
116	0.05	5.7362	0.1	5.8365	0.125	5.8739	0.2	5.9627	0.25	6.0107	0.5	6.2105	0.75	6.4215	0.8	6.4756	0.875	6.5749	0.9	6.6184	0.95	6.7423	111	6.1943	1.31877
117	0.05	5.7362	0.1	5.8365	0.125	5.8739	0.2	5.9627	0.25	6.0107	0.5	6.2105	0.75	6.4215	0.8	6.4756	0.875	6.5749	0.9	6.6184	0.95	6.7423	111	6.1943	1.31877
118	0.05	5.7362	0.1	5.8365	0.125	5.8739	0.2	5.9627	0.25	6.0107	0.5	6.2105	0.75	6.4215	0.8	6.4756	0.875	6.5749	0.9	6.6184	0.95	6.7423	111	6.1943	1.31877
119	0.05	5.7362	0.1	5.8365	0.125	5.8739	0.2	5.9627	0.25	6.0107	0.5	6.2105	0.75	6.4215	0.8	6.4756	0.875	6.5749	0.9	6.6184	0.95	6.7423	111	6.1943	1.31877
120	0.05	5.7362	0.1	5.8365	0.125	5.8739	0.2	5.9627	0.25	6.0107	0.5	6.2105	0.75	6.4215	0.8	6.4756	0.875	6.5749	0.9	6.6184	0.95	6.7423	111	6.1943	1.31877
121	0.05	5.7362	0.1	5.8365	0.125	5.8739	0.2	5.9627	0.25	6.0107	0.5	6.2105	0.75	6.4215	0.8	6.4756	0.875	6.5749	0.9	6.6184	0.95	6.7423	111	6.1943	1.31877
122	0.05	5.7362	0.1	5.8365	0.125	5.8739	0.2	5.9627	0.25	6.0107	0.5	6.2105	0.75	6.4215	0.8	6.4756	0.875	6.5749	0.9	6.6184	0.95	6.7423	111	6.1943	1.31877
123	0.05	5.7362	0.1	5.8365	0.125	5.8739	0.2	5.9627	0.25	6.0107	0.5	6.2105	0.75	6.4215	0.8	6.4756	0.875	6.5749	0.9	6.6184	0.95	6.7423	111	6.1943	1.31877
124	0.05	5.7362	0.1	5.8365	0.125	5.8739	0.2	5.9627	0.25	6.0107	0.5	6.2105	0.75	6.4215	0.8	6.4756	0.875	6.5749	0.9	6.6184	0.95	6.7423	111	6.1943	1.31877
125	0.05	5.7362	0.1	5.8365	0.125	5.8739	0.2	5.9627	0.25	6.0107	0.5	6.2105	0.75	6.4215	0.8	6.4756	0.875	6.5749	0.9	6.6184	0.95	6.7423	111	6.1943	1.31877
126	0.05	5.7362	0.1	5.8365	0.125	5.8739	0.2	5.9627	0.25	6.0107	0.5	6.2105	0.75	6.4215	0.8	6.4756	0.875	6.5749	0.9	6.6184	0.95	6.7423	111	6.1943	1.31877
127	0.05	5.7362	0.1	5.8365	0.125	5.8739	0.2	5.9627	0.25	6.0107	0.5	6.2105	0.75	6.4215	0.8	6.4756	0.875	6.5749	0.9	6.6184	0.95	6.7423	111	6.1943	1.31877
128	0.05	5.7362	0.1	5.8365	0.125	5.8739	0.2	5.9627	0.25	6.0107	0.5	6.2105	0.75	6.4215	0.8	6.4756	0.875	6.5749	0.9	6.6184	0.95	6.7423	111	6.1943	1.31877
129	0.05	5.7362	0.1	5.8365	0.125	5.8739	0.2	5.9627	0.25	6.0107	0.5	6.2105	0.75	6.4215	0.8	6.4756	0.875	6.5749	0.9	6.6184	0.95	6.7423	111	6.1943	1.31877
130	0.05	5.7362	0.1	5.8365	0.125	5.8739	0.2	5.9627	0.25	6.0107	0.5	6.2105	0.75	6.4215	0.8	6.4756	0.875	6.5749	0.9	6.6184	0.95	6.7423	111	6.1943	1.31877
131	0.05	5.7362	0.1	5.8365	0.125	5.8739	0.2	5.9627	0.25	6.0107	0.5	6.2105	0.75	6.4215	0.8	6.4756	0.875	6.5749	0.9	6.6184	0.95	6.7423	111	6.1943	1.31877
132	0.05	5.7362	0.1	5.8365	0.125	5.8739	0.2	5.9627	0.25	6.0107	0.5	6.2105	0.75	6.4215	0.8	6.4756	0.875	6.5749	0.9	6.6184	0.95	6.7423	111	6.1943	1.31877
133	0.05	5.7362	0.1	5.8365	0.125	5.8739	0.2	5.9627	0.25	6.0107	0.5	6.2105	0.75	6.4215	0.8	6.4756	0.875	6.5749	0.9	6.6184	0.95	6.7423	111	6.1943	1.31877
134	0.05	5.7362	0.1	5.8365	0.125	5.8739	0.2	5.9627	0.25	6.0107	0.5	6.2105	0.75	6.4215	0.8	6.4756	0.875	6.5749	0.9	6.6184	0.95	6.7423	111	6.1943	1.31877
135	0.05	5.7362	0.1	5.8365	0.125	5.8739	0.2	5.9627	0.25	6.0107	0.5	6.2105	0.75	6.4215	0.8	6.4756	0.875	6.5749	0.9	6.6184	0.95	6.7423	111	6.1943	1.31877
136	0.05	5.7362	0.1	5.8365	0.125	5.8739	0.2	5.9627	0.25	6.0107	0.5	6.2105	0.75	6.4215	0.8	6.4756	0.875	6.5749	0.9	6.6184	0.95	6.7423	111	6.1943	1.31877
137	0.05	5.7362	0.1	5.8365	0.125	5.8739	0.2	5.9627	0.25	6.0107	0.5	6.2105	0.75	6.4215	0.8	6.4756	0.875	6.5749	0.9	6.6184	0.95	6.7423	111	6.1943	1.31877
138	0.05	5.7362	0.1	5.8365	0.125	5.8739	0.2	5.9627	0.25	6.0107	0.5	6.2105	0.75	6.4215	0.8	6.4756	0.875	6.5749	0.9	6.6184	0.95	6.7423	111	6.1943	1.31877
139	0.05	5.7362	0.1	5.8365	0.125	5.8739	0.2	5.9627	0.25	6.0107	0.5	6.2105	0.75	6.4215	0.8	6.4756	0.875	6.5749	0.9	6.6184	0.95	6.7423	111	6.1943	1.31877
140	0.05	5.7362	0.1	5.8365	0.125	5.8739	0.2	5.9627	0.25	6.0107	0.5	6.2105	0.75	6.4215	0.8	6.4756	0.875	6.5749	0.9	6.6184	0.95	6.7423	111	6.1943	1.31877
141	0.05	5.7362	0.1	5.8365	0.125	5.8739	0.2	5.9627	0.25	6.0107	0.5	6.2105	0.75	6.4215	0.8	6.4756	0.875	6.5749	0.9	6.6184	0.95	6.7423	111	6.1943	1.31877
142	0.05	5.7362	0.1	5.8365	0.125	5.8739	0.2	5.9627	0.25	6.0107	0.5	6.2105	0.75	6.4215	0.8	6.4756	0.875	6.5749	0.9	6.6184	0.95	6.7423	111	6.1943	1.31877
143	0.05	5.7362	0.1	5.8365	0.125	5.8739	0.2	5.9627	0.25	6.0107	0.5	6.2105	0.75	6.4215	0.8	6.4756	0.875	6.5749	0.9	6.6184	0.95	6.7423	111	6.1943	1.31877
144	0.05	5.7362	0.1	5.8365	0.125	5.8739	0.2	5.9627	0.25	6.0107	0.5	6.2105	0.75	6.4215	0.8	6.4756	0.875	6.5749	0.9	6.6184	0.95	6.7423	111	6.1943	1.31877
145	0.05	5.7362	0.1	5.8365	0.125	5.8739	0.2	5.9627	0.25	6.0107	0.5	6.2105	0.75	6.4215	0.8	6.4756	0.875	6.5749	0.9	6.6184	0.95	6.7423	111	6.1943	1.31877
146	0.05	5.7362	0.1	5.8365	0.125	5.8739	0.2	5.9627	0.25	6.0107	0.5	6.2105	0.75	6.4215	0.8	6.4756	0.875	6.5749	0.9	6.6184	0.95	6.7423	111	6.1943	1.31877
147	0.05	5.7362	0.1	5.8365	0.125	5.8739	0.2	5.9627	0.25	6.0107	0.5	6.2105	0.75	6.4215	0.8	6.4756	0.875	6.5749	0.9	6.6184	0.95	6.7423	111	6.1943	1.31877
148	0.05	5.7362	0.1	5.8365	0.125	5.8739	0.2	5.9627	0.25	6.0107	0.5	6.2105	0.75	6.4215	0.8	6.4756	0.875	6.5749	0.9	6.6184	0.95	6.7423	111	6.1943	1.31877
149	0.05	5.7362	0.1	5.8365	0.125	5.8739	0.2	5.9627	0.25	6.0107	0.5	6.2105	0.75	6.4215	0.8	6.4756	0.875	6.5749	0.9	6.6184	0.95	6.7423	111	6.1943	1.31877
150	0.05	5.7362	0.1	5.8365	0.125	5.8739	0.2	5.9627	0.25	6.0107	0.5	6.2105	0.75	6.4215	0.8	6.4756	0.875	6.5749	0.9	6.6184	0.95	6.7423	111	6.1943	1.31877
151	0.05	5.7362	0.1	5.8365	0.125	5.8739	0.2	5.9627	0.25	6.0107	0.5	6.2105	0.75	6.4215	0.8	6.4756	0.875	6.5749	0.9	6.6184	0.95	6.7423	111	6.1943	1.31877
152	0.05	5.7362	0.1	5.8365	0.125	5.8739	0.2	5.9627	0.25	6.0107	0.5	6.2105	0.75	6.4215	0.8	6.4756	0.875	6.5749	0.9	6.6184	0.95	6.7423	111	6.1943	1.31877
153	0.05	5.7362	0.1	5.8365	0.125	5.8739	0.2	5.9627	0.25	6.0107	0.5	6.2105	0.75	6.4215	0.8	6.4756	0.875	6.5749	0.9	6.6184	0.95	6.7423	111	6.1943	1.31877
154	0.05	5.7362	0.1	5.8365	0.125	5.8739	0.2	5.9627	0.25	6.0107	0.5	6.2105	0.75	6.4215	0.8	6.4756	0.875	6.5749	0.9	6.6184	0.95	6.7423	111	6.1943	1.31877
155	0.05	5.7362	0.1	5.8365	0.125	5.8739	0.2	5.9627	0.25	6.0107	0.5	6.2105	0.75	6.4215	0.8	6.4756	0.875	6.5749	0.9	6.6184	0.95	6.7423	111	6.1943	1.31877
156	0.05	5.7362	0.1	5.8365	0.125	5.8739	0.2	5.9627	0.25	6.0107	0.5	6.2105	0.75	6.4215	0.8	6.4756	0.875	6.5749	0.9	6.6184	0.95	6.7423	111	6.1943	1.31877
157	0.05	5.7362	0.1	5.8365	0.125	5.8739	0.2	5.9627	0.25	6.0107	0.5	6.2105	0.75	6.4215	0.8	6.4756	0.875	6.5749	0.9	6.6184	0.95	6.7423	111	6.1943	1.31877
158	0.05	5.7362	0.1	5.8365	0.125	5.8739	0.2	5.9627	0.25	6.0107	0.5	6.2105	0.75	6.4215	0.8	6.4756	0.875	6.5749	0.9	6.6184	0.95	6.7423	111	6.1943	1.31877
