# Supplementary material for: Time-varying asymmetry and tail thickness in long series of daily financial returns
Source: publisher site journal article supplement (doi:10.1515/snde-2017-0071), 2018-10-02
Supplement: Supplementary file 197 [file thres_ucd.xlsx]

## Sheet: 1
	Var1	Var2	Var3	Var4	Var5	Var6	Var7	Var8	Var9	Var10	Var11	Var12	Var13	Var14	Var15	Var16	Var17	Var18	Var19	Var20	Var21	Var22	Var23	Var24	Var25
1	0	0	0	0	0	0	0	0	0	0	0	0	0	0	0	0	0	0	0	0	0	0	0	0	0
2	0.05	0.7544	0.1	0.7727	0.125	0.78	0.2	0.7978	0.25	0.8081	0.5	0.857	0.75	0.9209	0.8	0.9402	0.875	0.9804	0.9	0.9997	0.95	1.0631	111	0.8291	5.19677
3	0.05	0.7544	0.1	0.7727	0.125	0.78	0.2	0.7978	0.25	0.8081	0.5	0.857	0.75	0.9209	0.8	0.9402	0.875	0.9804	0.9	0.9997	0.95	1.0631	111	0.8291	5.19677
4	0.05	0.7544	0.1	0.7727	0.125	0.78	0.2	0.7978	0.25	0.8081	0.5	0.857	0.75	0.9209	0.8	0.9402	0.875	0.9804	0.9	0.9997	0.95	1.0631	111	0.8291	5.19677
5	0.05	0.7544	0.1	0.7727	0.125	0.78	0.2	0.7978	0.25	0.8081	0.5	0.857	0.75	0.9209	0.8	0.9402	0.875	0.9804	0.9	0.9997	0.95	1.0631	111	0.8291	5.19677
6	0.05	0.7544	0.1	0.7727	0.125	0.78	0.2	0.7978	0.25	0.8081	0.5	0.857	0.75	0.9209	0.8	0.9402	0.875	0.9804	0.9	0.9997	0.95	1.0631	111	0.8291	5.19677
7	0.05	0.7544	0.1	0.7727	0.125	0.78	0.2	0.7978	0.25	0.8081	0.5	0.857	0.75	0.9209	0.8	0.9402	0.875	0.9804	0.9	0.9997	0.95	1.0631	111	0.8291	5.19677
8	0.05	0.7544	0.1	0.7727	0.125	0.78	0.2	0.7978	0.25	0.8081	0.5	0.857	0.75	0.9209	0.8	0.9402	0.875	0.9804	0.9	0.9997	0.95	1.0631	111	0.8291	5.19677
9	0.05	0.7544	0.1	0.7727	0.125	0.78	0.2	0.7978	0.25	0.8081	0.5	0.857	0.75	0.9209	0.8	0.9402	0.875	0.9804	0.9	0.9997	0.95	1.0631	111	0.8291	5.19677
10	0.05	0.7544	0.1	0.7727	0.125	0.78	0.2	0.7978	0.25	0.8081	0.5	0.857	0.75	0.9209	0.8	0.9402	0.875	0.9804	0.9	0.9997	0.95	1.0631	111	0.8291	5.19677
11	0.05	0.7544	0.1	0.7727	0.125	0.78	0.2	0.7978	0.25	0.8081	0.5	0.857	0.75	0.9209	0.8	0.9402	0.875	0.9804	0.9	0.9997	0.95	1.0631	111	0.8291	5.19677
12	0.05	0.7544	0.1	0.7727	0.125	0.78	0.2	0.7978	0.25	0.8081	0.5	0.857	0.75	0.9209	0.8	0.9402	0.875	0.9804	0.9	0.9997	0.95	1.0631	111	0.8291	5.19677
13	0.05	0.7544	0.1	0.7727	0.125	0.78	0.2	0.7978	0.25	0.8081	0.5	0.857	0.75	0.9209	0.8	0.9402	0.875	0.9804	0.9	0.9997	0.95	1.0631	111	0.8291	5.19677
14	0.05	0.7544	0.1	0.7727	0.125	0.78	0.2	0.7978	0.25	0.8081	0.5	0.857	0.75	0.9209	0.8	0.9402	0.875	0.9804	0.9	0.9997	0.95	1.0631	111	0.8291	5.19677
15	0.05	0.7544	0.1	0.7727	0.125	0.78	0.2	0.7978	0.25	0.8081	0.5	0.857	0.75	0.9209	0.8	0.9402	0.875	0.9804	0.9	0.9997	0.95	1.0631	111	0.8291	5.19677
16	0.05	0.7544	0.1	0.7727	0.125	0.78	0.2	0.7978	0.25	0.8081	0.5	0.857	0.75	0.9209	0.8	0.9402	0.875	0.9804	0.9	0.9997	0.95	1.0631	111	0.8291	5.19677
17	0.05	0.7544	0.1	0.7727	0.125	0.78	0.2	0.7978	0.25	0.8081	0.5	0.857	0.75	0.9209	0.8	0.9402	0.875	0.9804	0.9	0.9997	0.95	1.0631	111	0.8291	5.19677
18	0.05	0.7544	0.1	0.7727	0.125	0.78	0.2	0.7978	0.25	0.8081	0.5	0.857	0.75	0.9209	0.8	0.9402	0.875	0.9804	0.9	0.9997	0.95	1.0631	111	0.8291	5.19677
19	0.05	0.7544	0.1	0.7727	0.125	0.78	0.2	0.7978	0.25	0.8081	0.5	0.857	0.75	0.9209	0.8	0.9402	0.875	0.9804	0.9	0.9997	0.95	1.0631	111	0.8291	5.19677
20	0.05	0.7544	0.1	0.7727	0.125	0.78	0.2	0.7978	0.25	0.8081	0.5	0.857	0.75	0.9209	0.8	0.9402	0.875	0.9804	0.9	0.9997	0.95	1.0631	111	0.8291	5.19677
21	0.05	0.7544	0.1	0.7727	0.125	0.78	0.2	0.7978	0.25	0.8081	0.5	0.857	0.75	0.9209	0.8	0.9402	0.875	0.9804	0.9	0.9997	0.95	1.0631	111	0.8291	5.19677
22	0.05	0.7544	0.1	0.7727	0.125	0.78	0.2	0.7978	0.25	0.8081	0.5	0.857	0.75	0.9209	0.8	0.9402	0.875	0.9804	0.9	0.9997	0.95	1.0631	111	0.8291	5.19677
23	0.05	0.7544	0.1	0.7727	0.125	0.78	0.2	0.7978	0.25	0.8081	0.5	0.857	0.75	0.9209	0.8	0.9402	0.875	0.9804	0.9	0.9997	0.95	1.0631	111	0.8291	5.19677
24	0.05	0.7544	0.1	0.7727	0.125	0.78	0.2	0.7978	0.25	0.8081	0.5	0.857	0.75	0.9209	0.8	0.9402	0.875	0.9804	0.9	0.9997	0.95	1.0631	111	0.8291	5.19677
25	0.05	0.7544	0.1	0.7727	0.125	0.78	0.2	0.7978	0.25	0.8081	0.5	0.857	0.75	0.9209	0.8	0.9402	0.875	0.9804	0.9	0.9997	0.95	1.0631	111	0.8291	5.19677
26	0.05	0.7544	0.1	0.7727	0.125	0.78	0.2	0.7978	0.25	0.8081	0.5	0.857	0.75	0.9209	0.8	0.9402	0.875	0.9804	0.9	0.9997	0.95	1.0631	111	0.8291	5.19677
27	0.05	0.7544	0.1	0.7727	0.125	0.78	0.2	0.7978	0.25	0.8081	0.5	0.857	0.75	0.9209	0.8	0.9402	0.875	0.9804	0.9	0.9997	0.95	1.0631	111	0.8291	5.19677
28	0.05	0.7544	0.1	0.7727	0.125	0.78	0.2	0.7978	0.25	0.8081	0.5	0.857	0.75	0.9209	0.8	0.9402	0.875	0.9804	0.9	0.9997	0.95	1.0631	111	0.8291	5.19677
29	0.05	0.7544	0.1	0.7727	0.125	0.78	0.2	0.7978	0.25	0.8081	0.5	0.857	0.75	0.9209	0.8	0.9402	0.875	0.9804	0.9	0.9997	0.95	1.0631	111	0.8291	5.19677
30	0.05	0.7544	0.1	0.7727	0.125	0.78	0.2	0.7978	0.25	0.8081	0.5	0.857	0.75	0.9209	0.8	0.9402	0.875	0.9804	0.9	0.9997	0.95	1.0631	111	0.8291	5.19677
31	0.05	0.7544	0.1	0.7727	0.125	0.78	0.2	0.7978	0.25	0.8081	0.5	0.857	0.75	0.9209	0.8	0.9402	0.875	0.9804	0.9	0.9997	0.95	1.0631	111	0.8291	5.19677
32	0.05	0.7544	0.1	0.7727	0.125	0.78	0.2	0.7978	0.25	0.8081	0.5	0.857	0.75	0.9209	0.8	0.9402	0.875	0.9804	0.9	0.9997	0.95	1.0631	111	0.8291	5.19677
33	0.05	0.7544	0.1	0.7727	0.125	0.78	0.2	0.7978	0.25	0.8081	0.5	0.857	0.75	0.9209	0.8	0.9402	0.875	0.9804	0.9	0.9997	0.95	1.0631	111	0.8291	5.19677
34	0.05	0.7544	0.1	0.7727	0.125	0.78	0.2	0.7978	0.25	0.8081	0.5	0.857	0.75	0.9209	0.8	0.9402	0.875	0.9804	0.9	0.9997	0.95	1.0631	111	0.8291	5.19677
35	0.05	0.7544	0.1	0.7727	0.125	0.78	0.2	0.7978	0.25	0.8081	0.5	0.857	0.75	0.9209	0.8	0.9402	0.875	0.9804	0.9	0.9997	0.95	1.0631	111	0.8291	5.19677
36	0.05	0.7544	0.1	0.7727	0.125	0.78	0.2	0.7978	0.25	0.8081	0.5	0.857	0.75	0.9209	0.8	0.9402	0.875	0.9804	0.9	0.9997	0.95	1.0631	111	0.8291	5.19677
37	0.05	0.7544	0.1	0.7727	0.125	0.78	0.2	0.7978	0.25	0.8081	0.5	0.857	0.75	0.9209	0.8	0.9402	0.875	0.9804	0.9	0.9997	0.95	1.0631	111	0.8291	5.19677
38	0.05	0.7544	0.1	0.7727	0.125	0.78	0.2	0.7978	0.25	0.8081	0.5	0.857	0.75	0.9209	0.8	0.9402	0.875	0.9804	0.9	0.9997	0.95	1.0631	111	0.8291	5.19677
39	0.05	0.7544	0.1	0.7727	0.125	0.78	0.2	0.7978	0.25	0.8081	0.5	0.857	0.75	0.9209	0.8	0.9402	0.875	0.9804	0.9	0.9997	0.95	1.0631	111	0.8291	5.19677
40	0.05	0.7544	0.1	0.7727	0.125	0.78	0.2	0.7978	0.25	0.8081	0.5	0.857	0.75	0.9209	0.8	0.9402	0.875	0.9804	0.9	0.9997	0.95	1.0631	111	0.8291	5.19677
41	0.05	0.7544	0.1	0.7727	0.125	0.78	0.2	0.7978	0.25	0.8081	0.5	0.857	0.75	0.9209	0.8	0.9402	0.875	0.9804	0.9	0.9997	0.95	1.0631	111	0.8291	5.19677
42	0.05	0.7544	0.1	0.7727	0.125	0.78	0.2	0.7978	0.25	0.8081	0.5	0.857	0.75	0.9209	0.8	0.9402	0.875	0.9804	0.9	0.9997	0.95	1.0631	111	0.8291	5.19677
43	0.05	0.7544	0.1	0.7727	0.125	0.78	0.2	0.7978	0.25	0.8081	0.5	0.857	0.75	0.9209	0.8	0.9402	0.875	0.9804	0.9	0.9997	0.95	1.0631	111	0.8291	5.19677
44	0.05	0.7544	0.1	0.7727	0.125	0.78	0.2	0.7978	0.25	0.8081	0.5	0.857	0.75	0.9209	0.8	0.9402	0.875	0.9804	0.9	0.9997	0.95	1.0631	111	0.8291	5.19677
45	0.05	0.7544	0.1	0.7727	0.125	0.78	0.2	0.7978	0.25	0.8081	0.5	0.857	0.75	0.9209	0.8	0.9402	0.875	0.9804	0.9	0.9997	0.95	1.0631	111	0.8291	5.19677
46	0.05	0.7544	0.1	0.7727	0.125	0.78	0.2	0.7978	0.25	0.8081	0.5	0.857	0.75	0.9209	0.8	0.9402	0.875	0.9804	0.9	0.9997	0.95	1.0631	111	0.8291	5.19677
47	0.05	0.7544	0.1	0.7727	0.125	0.78	0.2	0.7978	0.25	0.8081	0.5	0.857	0.75	0.9209	0.8	0.9402	0.875	0.9804	0.9	0.9997	0.95	1.0631	111	0.8291	5.19677
48	0.05	0.7544	0.1	0.7727	0.125	0.78	0.2	0.7978	0.25	0.8081	0.5	0.857	0.75	0.9209	0.8	0.9402	0.875	0.9804	0.9	0.9997	0.95	1.0631	111	0.8291	5.19677
49	0.05	0.7544	0.1	0.7727	0.125	0.78	0.2	0.7978	0.25	0.8081	0.5	0.857	0.75	0.9209	0.8	0.9402	0.875	0.9804	0.9	0.9997	0.95	1.0631	111	0.8291	5.19677
50	0.05	0.7544	0.1	0.7727	0.125	0.78	0.2	0.7978	0.25	0.8081	0.5	0.857	0.75	0.9209	0.8	0.9402	0.875	0.9804	0.9	0.9997	0.95	1.0631	111	0.8291	5.19677
51	0.05	0.7544	0.1	0.7727	0.125	0.78	0.2	0.7978	0.25	0.8081	0.5	0.857	0.75	0.9209	0.8	0.9402	0.875	0.9804	0.9	0.9997	0.95	1.0631	111	0.8291	5.19677
52	0.05	0.7544	0.1	0.7727	0.125	0.78	0.2	0.7978	0.25	0.8081	0.5	0.857	0.75	0.9209	0.8	0.9402	0.875	0.9804	0.9	0.9997	0.95	1.0631	111	0.8291	5.19677
53	0.05	0.7544	0.1	0.7727	0.125	0.78	0.2	0.7978	0.25	0.8081	0.5	0.857	0.75	0.9209	0.8	0.9402	0.875	0.9804	0.9	0.9997	0.95	1.0631	111	0.8291	5.19677
54	0.05	0.7544	0.1	0.7727	0.125	0.78	0.2	0.7978	0.25	0.8081	0.5	0.857	0.75	0.9209	0.8	0.9402	0.875	0.9804	0.9	0.9997	0.95	1.0631	111	0.8291	5.19677
55	0.05	0.7544	0.1	0.7727	0.125	0.78	0.2	0.7978	0.25	0.8081	0.5	0.857	0.75	0.9209	0.8	0.9402	0.875	0.9804	0.9	0.9997	0.95	1.0631	111	0.8291	5.19677
56	0.05	0.7544	0.1	0.7727	0.125	0.78	0.2	0.7978	0.25	0.8081	0.5	0.857	0.75	0.9209	0.8	0.9402	0.875	0.9804	0.9	0.9997	0.95	1.0631	111	0.8291	5.19677
57	0.05	0.7544	0.1	0.7727	0.125	0.78	0.2	0.7978	0.25	0.8081	0.5	0.857	0.75	0.9209	0.8	0.9402	0.875	0.9804	0.9	0.9997	0.95	1.0631	111	0.8291	5.19677
58	0.05	0.7544	0.1	0.7727	0.125	0.78	0.2	0.7978	0.25	0.8081	0.5	0.857	0.75	0.9209	0.8	0.9402	0.875	0.9804	0.9	0.9997	0.95	1.0631	111	0.8291	5.19677
59	0.05	0.7544	0.1	0.7727	0.125	0.78	0.2	0.7978	0.25	0.8081	0.5	0.857	0.75	0.9209	0.8	0.9402	0.875	0.9804	0.9	0.9997	0.95	1.0631	111	0.8291	5.19677
60	0.05	0.7544	0.1	0.7727	0.125	0.78	0.2	0.7978	0.25	0.8081	0.5	0.857	0.75	0.9209	0.8	0.9402	0.875	0.9804	0.9	0.9997	0.95	1.0631	111	0.8291	5.19677
61	0.05	0.7544	0.1	0.7727	0.125	0.78	0.2	0.7978	0.25	0.8081	0.5	0.857	0.75	0.9209	0.8	0.9402	0.875	0.9804	0.9	0.9997	0.95	1.0631	111	0.8291	5.19677
62	0.05	0.7544	0.1	0.7727	0.125	0.78	0.2	0.7978	0.25	0.8081	0.5	0.857	0.75	0.9209	0.8	0.9402	0.875	0.9804	0.9	0.9997	0.95	1.0631	111	0.8291	5.19677
63	0.05	0.7544	0.1	0.7727	0.125	0.78	0.2	0.7978	0.25	0.8081	0.5	0.857	0.75	0.9209	0.8	0.9402	0.875	0.9804	0.9	0.9997	0.95	1.0631	111	0.8291	5.19677
64	0.05	0.7544	0.1	0.7727	0.125	0.78	0.2	0.7978	0.25	0.8081	0.5	0.857	0.75	0.9209	0.8	0.9402	0.875	0.9804	0.9	0.9997	0.95	1.0631	111	0.8291	5.19677
65	0.05	0.7544	0.1	0.7727	0.125	0.78	0.2	0.7978	0.25	0.8081	0.5	0.857	0.75	0.9209	0.8	0.9402	0.875	0.9804	0.9	0.9997	0.95	1.0631	111	0.8291	5.19677
66	0.05	0.7544	0.1	0.7727	0.125	0.78	0.2	0.7978	0.25	0.8081	0.5	0.857	0.75	0.9209	0.8	0.9402	0.875	0.9804	0.9	0.9997	0.95	1.0631	111	0.8291	5.19677
67	0.05	0.7544	0.1	0.7727	0.125	0.78	0.2	0.7978	0.25	0.8081	0.5	0.857	0.75	0.9209	0.8	0.9402	0.875	0.9804	0.9	0.9997	0.95	1.0631	111	0.8291	5.19677
68	0.05	0.7544	0.1	0.7727	0.125	0.78	0.2	0.7978	0.25	0.8081	0.5	0.857	0.75	0.9209	0.8	0.9402	0.875	0.9804	0.9	0.9997	0.95	1.0631	111	0.8291	5.19677
69	0.05	0.7544	0.1	0.7727	0.125	0.78	0.2	0.7978	0.25	0.8081	0.5	0.857	0.75	0.9209	0.8	0.9402	0.875	0.9804	0.9	0.9997	0.95	1.0631	111	0.8291	5.19677
70	0.05	0.7544	0.1	0.7727	0.125	0.78	0.2	0.7978	0.25	0.8081	0.5	0.857	0.75	0.9209	0.8	0.9402	0.875	0.9804	0.9	0.9997	0.95	1.0631	111	0.8291	5.19677
71	0.05	0.7544	0.1	0.7727	0.125	0.78	0.2	0.7978	0.25	0.8081	0.5	0.857	0.75	0.9209	0.8	0.9402	0.875	0.9804	0.9	0.9997	0.95	1.0631	111	0.8291	5.19677
72	0.05	0.7544	0.1	0.7727	0.125	0.78	0.2	0.7978	0.25	0.8081	0.5	0.857	0.75	0.9209	0.8	0.9402	0.875	0.9804	0.9	0.9997	0.95	1.0631	111	0.8291	5.19677
73	0.05	0.7544	0.1	0.7727	0.125	0.78	0.2	0.7978	0.25	0.8081	0.5	0.857	0.75	0.9209	0.8	0.9402	0.875	0.9804	0.9	0.9997	0.95	1.0631	111	0.8291	5.19677
74	0.05	0.7544	0.1	0.7727	0.125	0.78	0.2	0.7978	0.25	0.8081	0.5	0.857	0.75	0.9209	0.8	0.9402	0.875	0.9804	0.9	0.9997	0.95	1.0631	111	0.8291	5.19677
75	0.05	0.7544	0.1	0.7727	0.125	0.78	0.2	0.7978	0.25	0.8081	0.5	0.857	0.75	0.9209	0.8	0.9402	0.875	0.9804	0.9	0.9997	0.95	1.0631	111	0.8291	5.19677
76	0.05	0.7544	0.1	0.7727	0.125	0.78	0.2	0.7978	0.25	0.8081	0.5	0.857	0.75	0.9209	0.8	0.9402	0.875	0.9804	0.9	0.9997	0.95	1.0631	111	0.8291	5.19677
77	0.05	0.7544	0.1	0.7727	0.125	0.78	0.2	0.7978	0.25	0.8081	0.5	0.857	0.75	0.9209	0.8	0.9402	0.875	0.9804	0.9	0.9997	0.95	1.0631	111	0.8291	5.19677
78	0.05	0.7544	0.1	0.7727	0.125	0.78	0.2	0.7978	0.25	0.8081	0.5	0.857	0.75	0.9209	0.8	0.9402	0.875	0.9804	0.9	0.9997	0.95	1.0631	111	0.8291	5.19677
79	0.05	0.7544	0.1	0.7727	0.125	0.78	0.2	0.7978	0.25	0.8081	0.5	0.857	0.75	0.9209	0.8	0.9402	0.875	0.9804	0.9	0.9997	0.95	1.0631	111	0.8291	5.19677
80	0.05	0.7544	0.1	0.7727	0.125	0.78	0.2	0.7978	0.25	0.8081	0.5	0.857	0.75	0.9209	0.8	0.9402	0.875	0.9804	0.9	0.9997	0.95	1.0631	111	0.8291	5.19677
81	0.05	0.7544	0.1	0.7727	0.125	0.78	0.2	0.7978	0.25	0.8081	0.5	0.857	0.75	0.9209	0.8	0.9402	0.875	0.9804	0.9	0.9997	0.95	1.0631	111	0.8291	5.19677
82	0.05	0.7544	0.1	0.7727	0.125	0.78	0.2	0.7978	0.25	0.8081	0.5	0.857	0.75	0.9209	0.8	0.9402	0.875	0.9804	0.9	0.9997	0.95	1.0631	111	0.8291	5.19677
83	0.05	0.7544	0.1	0.7727	0.125	0.78	0.2	0.7978	0.25	0.8081	0.5	0.857	0.75	0.9209	0.8	0.9402	0.875	0.9804	0.9	0.9997	0.95	1.0631	111	0.8291	5.19677
84	0.05	0.7544	0.1	0.7727	0.125	0.78	0.2	0.7978	0.25	0.8081	0.5	0.857	0.75	0.9209	0.8	0.9402	0.875	0.9804	0.9	0.9997	0.95	1.0631	111	0.8291	5.19677
85	0.05	0.7544	0.1	0.7727	0.125	0.78	0.2	0.7978	0.25	0.8081	0.5	0.857	0.75	0.9209	0.8	0.9402	0.875	0.9804	0.9	0.9997	0.95	1.0631	111	0.8291	5.19677
86	0.05	0.7544	0.1	0.7727	0.125	0.78	0.2	0.7978	0.25	0.8081	0.5	0.857	0.75	0.9209	0.8	0.9402	0.875	0.9804	0.9	0.9997	0.95	1.0631	111	0.8291	5.19677
87	0.05	0.7544	0.1	0.7727	0.125	0.78	0.2	0.7978	0.25	0.8081	0.5	0.857	0.75	0.9209	0.8	0.9402	0.875	0.9804	0.9	0.9997	0.95	1.0631	111	0.8291	5.19677
88	0.05	0.7544	0.1	0.7727	0.125	0.78	0.2	0.7978	0.25	0.8081	0.5	0.857	0.75	0.9209	0.8	0.9402	0.875	0.9804	0.9	0.9997	0.95	1.0631	111	0.8291	5.19677
89	0.05	0.7544	0.1	0.7727	0.125	0.78	0.2	0.7978	0.25	0.8081	0.5	0.857	0.75	0.9209	0.8	0.9402	0.875	0.9804	0.9	0.9997	0.95	1.0631	111	0.8291	5.19677
90	0.05	0.7544	0.1	0.7727	0.125	0.78	0.2	0.7978	0.25	0.8081	0.5	0.857	0.75	0.9209	0.8	0.9402	0.875	0.9804	0.9	0.9997	0.95	1.0631	111	0.8291	5.19677
91	0.05	0.7544	0.1	0.7727	0.125	0.78	0.2	0.7978	0.25	0.8081	0.5	0.857	0.75	0.9209	0.8	0.9402	0.875	0.9804	0.9	0.9997	0.95	1.0631	111	0.8291	5.19677
92	0.05	0.7544	0.1	0.7727	0.125	0.78	0.2	0.7978	0.25	0.8081	0.5	0.857	0.75	0.9209	0.8	0.9402	0.875	0.9804	0.9	0.9997	0.95	1.0631	111	0.8291	5.19677
93	0.05	0.7544	0.1	0.7727	0.125	0.78	0.2	0.7978	0.25	0.8081	0.5	0.857	0.75	0.9209	0.8	0.9402	0.875	0.9804	0.9	0.9997	0.95	1.0631	111	0.8291	5.19677
94	0.05	0.7544	0.1	0.7727	0.125	0.78	0.2	0.7978	0.25	0.8081	0.5	0.857	0.75	0.9209	0.8	0.9402	0.875	0.9804	0.9	0.9997	0.95	1.0631	111	0.8291	5.19677
95	0.05	0.7544	0.1	0.7727	0.125	0.78	0.2	0.7978	0.25	0.8081	0.5	0.857	0.75	0.9209	0.8	0.9402	0.875	0.9804	0.9	0.9997	0.95	1.0631	111	0.8291	5.19677
96	0.05	0.7544	0.1	0.7727	0.125	0.78	0.2	0.7978	0.25	0.8081	0.5	0.857	0.75	0.9209	0.8	0.9402	0.875	0.9804	0.9	0.9997	0.95	1.0631	111	0.8291	5.19677
97	0.05	0.7544	0.1	0.7727	0.125	0.78	0.2	0.7978	0.25	0.8081	0.5	0.857	0.75	0.9209	0.8	0.9402	0.875	0.9804	0.9	0.9997	0.95	1.0631	111	0.8291	5.19677
98	0.05	0.7544	0.1	0.7727	0.125	0.78	0.2	0.7978	0.25	0.8081	0.5	0.857	0.75	0.9209	0.8	0.9402	0.875	0.9804	0.9	0.9997	0.95	1.0631	111	0.8291	5.19677
99	0.05	0.7544	0.1	0.7727	0.125	0.78	0.2	0.7978	0.25	0.8081	0.5	0.857	0.75	0.9209	0.8	0.9402	0.875	0.9804	0.9	0.9997	0.95	1.0631	111	0.8291	5.19677
100	0.05	0.7544	0.1	0.7727	0.125	0.78	0.2	0.7978	0.25	0.8081	0.5	0.857	0.75	0.9209	0.8	0.9402	0.875	0.9804	0.9	0.9997	0.95	1.0631	111	0.8291	5.19677
101	0.05	0.7544	0.1	0.7727	0.125	0.78	0.2	0.7978	0.25	0.8081	0.5	0.857	0.75	0.9209	0.8	0.9402	0.875	0.9804	0.9	0.9997	0.95	1.0631	111	0.8291	5.19677
102	0.05	0.7544	0.1	0.7727	0.125	0.78	0.2	0.7978	0.25	0.8081	0.5	0.857	0.75	0.9209	0.8	0.9402	0.875	0.9804	0.9	0.9997	0.95	1.0631	111	0.8291	5.19677
103	0.05	0.7544	0.1	0.7727	0.125	0.78	0.2	0.7978	0.25	0.8081	0.5	0.857	0.75	0.9209	0.8	0.9402	0.875	0.9804	0.9	0.9997	0.95	1.0631	111	0.8291	5.19677
104	0.05	0.7544	0.1	0.7727	0.125	0.78	0.2	0.7978	0.25	0.8081	0.5	0.857	0.75	0.9209	0.8	0.9402	0.875	0.9804	0.9	0.9997	0.95	1.0631	111	0.8291	5.19677
105	0.05	0.7544	0.1	0.7727	0.125	0.78	0.2	0.7978	0.25	0.8081	0.5	0.857	0.75	0.9209	0.8	0.9402	0.875	0.9804	0.9	0.9997	0.95	1.0631	111	0.8291	5.19677
106	0.05	0.7544	0.1	0.7727	0.125	0.78	0.2	0.7978	0.25	0.8081	0.5	0.857	0.75	0.9209	0.8	0.9402	0.875	0.9804	0.9	0.9997	0.95	1.0631	111	0.8291	5.19677
107	0.05	0.7544	0.1	0.7727	0.125	0.78	0.2	0.7978	0.25	0.8081	0.5	0.857	0.75	0.9209	0.8	0.9402	0.875	0.9804	0.9	0.9997	0.95	1.0631	111	0.8291	5.19677
108	0.05	0.7544	0.1	0.7727	0.125	0.78	0.2	0.7978	0.25	0.8081	0.5	0.857	0.75	0.9209	0.8	0.9402	0.875	0.9804	0.9	0.9997	0.95	1.0631	111	0.8291	5.19677
109	0.05	0.7544	0.1	0.7727	0.125	0.78	0.2	0.7978	0.25	0.8081	0.5	0.857	0.75	0.9209	0.8	0.9402	0.875	0.9804	0.9	0.9997	0.95	1.0631	111	0.8291	5.19677
110	0.05	0.7544	0.1	0.7727	0.125	0.78	0.2	0.7978	0.25	0.8081	0.5	0.857	0.75	0.9209	0.8	0.9402	0.875	0.9804	0.9	0.9997	0.95	1.0631	111	0.8291	5.19677
111	0.05	0.7544	0.1	0.7727	0.125	0.78	0.2	0.7978	0.25	0.8081	0.5	0.857	0.75	0.9209	0.8	0.9402	0.875	0.9804	0.9	0.9997	0.95	1.0631	111	0.8291	5.19677
112	0.05	0.7544	0.1	0.7727	0.125	0.78	0.2	0.7978	0.25	0.8081	0.5	0.857	0.75	0.9209	0.8	0.9402	0.875	0.9804	0.9	0.9997	0.95	1.0631	111	0.8291	5.19677
113	0.05	0.7544	0.1	0.7727	0.125	0.78	0.2	0.7978	0.25	0.8081	0.5	0.857	0.75	0.9209	0.8	0.9402	0.875	0.9804	0.9	0.9997	0.95	1.0631	111	0.8291	5.19677
114	0.05	0.7544	0.1	0.7727	0.125	0.78	0.2	0.7978	0.25	0.8081	0.5	0.857	0.75	0.9209	0.8	0.9402	0.875	0.9804	0.9	0.9997	0.95	1.0631	111	0.8291	5.19677
115	0.05	0.7544	0.1	0.7727	0.125	0.78	0.2	0.7978	0.25	0.8081	0.5	0.857	0.75	0.9209	0.8	0.9402	0.875	0.9804	0.9	0.9997	0.95	1.0631	111	0.8291	5.19677
116	0.05	0.7544	0.1	0.7727	0.125	0.78	0.2	0.7978	0.25	0.8081	0.5	0.857	0.75	0.9209	0.8	0.9402	0.875	0.9804	0.9	0.9997	0.95	1.0631	111	0.8291	5.19677
117	0.05	0.7544	0.1	0.7727	0.125	0.78	0.2	0.7978	0.25	0.8081	0.5	0.857	0.75	0.9209	0.8	0.9402	0.875	0.9804	0.9	0.9997	0.95	1.0631	111	0.8291	5.19677
118	0.05	0.7544	0.1	0.7727	0.125	0.78	0.2	0.7978	0.25	0.8081	0.5	0.857	0.75	0.9209	0.8	0.9402	0.875	0.9804	0.9	0.9997	0.95	1.0631	111	0.8291	5.19677
119	0.05	0.7544	0.1	0.7727	0.125	0.78	0.2	0.7978	0.25	0.8081	0.5	0.857	0.75	0.9209	0.8	0.9402	0.875	0.9804	0.9	0.9997	0.95	1.0631	111	0.8291	5.19677
120	0.05	0.7544	0.1	0.7727	0.125	0.78	0.2	0.7978	0.25	0.8081	0.5	0.857	0.75	0.9209	0.8	0.9402	0.875	0.9804	0.9	0.9997	0.95	1.0631	111	0.8291	5.19677
121	0.05	0.7544	0.1	0.7727	0.125	0.78	0.2	0.7978	0.25	0.8081	0.5	0.857	0.75	0.9209	0.8	0.9402	0.875	0.9804	0.9	0.9997	0.95	1.0631	111	0.8291	5.19677
122	0.05	0.7544	0.1	0.7727	0.125	0.78	0.2	0.7978	0.25	0.8081	0.5	0.857	0.75	0.9209	0.8	0.9402	0.875	0.9804	0.9	0.9997	0.95	1.0631	111	0.8291	5.19677
123	0.05	0.7544	0.1	0.7727	0.125	0.78	0.2	0.7978	0.25	0.8081	0.5	0.857	0.75	0.9209	0.8	0.9402	0.875	0.9804	0.9	0.9997	0.95	1.0631	111	0.8291	5.19677
124	0.05	0.7544	0.1	0.7727	0.125	0.78	0.2	0.7978	0.25	0.8081	0.5	0.857	0.75	0.9209	0.8	0.9402	0.875	0.9804	0.9	0.9997	0.95	1.0631	111	0.8291	5.19677
125	0.05	0.7544	0.1	0.7727	0.125	0.78	0.2	0.7978	0.25	0.8081	0.5	0.857	0.75	0.9209	0.8	0.9402	0.875	0.9804	0.9	0.9997	0.95	1.0631	111	0.8291	5.19677
126	0.05	0.7544	0.1	0.7727	0.125	0.78	0.2	0.7978	0.25	0.8081	0.5	0.857	0.75	0.9209	0.8	0.9402	0.875	0.9804	0.9	0.9997	0.95	1.0631	111	0.8291	5.19677
127	0.05	0.7544	0.1	0.7727	0.125	0.78	0.2	0.7978	0.25	0.8081	0.5	0.857	0.75	0.9209	0.8	0.9402	0.875	0.9804	0.9	0.9997	0.95	1.0631	111	0.8291	5.19677
128	0.05	0.7544	0.1	0.7727	0.125	0.78	0.2	0.7978	0.25	0.8081	0.5	0.857	0.75	0.9209	0.8	0.9402	0.875	0.9804	0.9	0.9997	0.95	1.0631	111	0.8291	5.19677
129	0.05	0.7544	0.1	0.7727	0.125	0.78	0.2	0.7978	0.25	0.8081	0.5	0.857	0.75	0.9209	0.8	0.9402	0.875	0.9804	0.9	0.9997	0.95	1.0631	111	0.8291	5.19677
130	0.05	0.7544	0.1	0.7727	0.125	0.78	0.2	0.7978	0.25	0.8081	0.5	0.857	0.75	0.9209	0.8	0.9402	0.875	0.9804	0.9	0.9997	0.95	1.0631	111	0.8291	5.19677
131	0.05	0.7544	0.1	0.7727	0.125	0.78	0.2	0.7978	0.25	0.8081	0.5	0.857	0.75	0.9209	0.8	0.9402	0.875	0.9804	0.9	0.9997	0.95	1.0631	111	0.8291	5.19677
132	0.05	0.7544	0.1	0.7727	0.125	0.78	0.2	0.7978	0.25	0.8081	0.5	0.857	0.75	0.9209	0.8	0.9402	0.875	0.9804	0.9	0.9997	0.95	1.0631	111	0.8291	5.19677
133	0.05	0.7544	0.1	0.7727	0.125	0.78	0.2	0.7978	0.25	0.8081	0.5	0.857	0.75	0.9209	0.8	0.9402	0.875	0.9804	0.9	0.9997	0.95	1.0631	111	0.8291	5.19677
134	0.05	0.7544	0.1	0.7727	0.125	0.78	0.2	0.7978	0.25	0.8081	0.5	0.857	0.75	0.9209	0.8	0.9402	0.875	0.9804	0.9	0.9997	0.95	1.0631	111	0.8291	5.19677
135	0.05	0.7544	0.1	0.7727	0.125	0.78	0.2	0.7978	0.25	0.8081	0.5	0.857	0.75	0.9209	0.8	0.9402	0.875	0.9804	0.9	0.9997	0.95	1.0631	111	0.8291	5.19677
136	0.05	0.7544	0.1	0.7727	0.125	0.78	0.2	0.7978	0.25	0.8081	0.5	0.857	0.75	0.9209	0.8	0.9402	0.875	0.9804	0.9	0.9997	0.95	1.0631	111	0.8291	5.19677
137	0.05	0.7544	0.1	0.7727	0.125	0.78	0.2	0.7978	0.25	0.8081	0.5	0.857	0.75	0.9209	0.8	0.9402	0.875	0.9804	0.9	0.9997	0.95	1.0631	111	0.8291	5.19677
138	0.05	0.7544	0.1	0.7727	0.125	0.78	0.2	0.7978	0.25	0.8081	0.5	0.857	0.75	0.9209	0.8	0.9402	0.875	0.9804	0.9	0.9997	0.95	1.0631	111	0.8291	5.19677
139	0.05	0.7544	0.1	0.7727	0.125	0.78	0.2	0.7978	0.25	0.8081	0.5	0.857	0.75	0.9209	0.8	0.9402	0.875	0.9804	0.9	0.9997	0.95	1.0631	111	0.8291	5.19677
140	0.05	0.7544	0.1	0.7727	0.125	0.78	0.2	0.7978	0.25	0.8081	0.5	0.857	0.75	0.9209	0.8	0.9402	0.875	0.9804	0.9	0.9997	0.95	1.0631	111	0.8291	5.19677
141	0.05	0.7544	0.1	0.7727	0.125	0.78	0.2	0.7978	0.25	0.8081	0.5	0.857	0.75	0.9209	0.8	0.9402	0.875	0.9804	0.9	0.9997	0.95	1.0631	111	0.8291	5.19677
142	0.05	0.7544	0.1	0.7727	0.125	0.78	0.2	0.7978	0.25	0.8081	0.5	0.857	0.75	0.9209	0.8	0.9402	0.875	0.9804	0.9	0.9997	0.95	1.0631	111	0.8291	5.19677
143	0.05	0.7544	0.1	0.7727	0.125	0.78	0.2	0.7978	0.25	0.8081	0.5	0.857	0.75	0.9209	0.8	0.9402	0.875	0.9804	0.9	0.9997	0.95	1.0631	111	0.8291	5.19677
144	0.05	0.7544	0.1	0.7727	0.125	0.78	0.2	0.7978	0.25	0.8081	0.5	0.857	0.75	0.9209	0.8	0.9402	0.875	0.9804	0.9	0.9997	0.95	1.0631	111	0.8291	5.19677
145	0.05	0.7544	0.1	0.7727	0.125	0.78	0.2	0.7978	0.25	0.8081	0.5	0.857	0.75	0.9209	0.8	0.9402	0.875	0.9804	0.9	0.9997	0.95	1.0631	111	0.8291	5.19677
146	0.05	0.7544	0.1	0.7727	0.125	0.78	0.2	0.7978	0.25	0.8081	0.5	0.857	0.75	0.9209	0.8	0.9402	0.875	0.9804	0.9	0.9997	0.95	1.0631	111	0.8291	5.19677
147	0.05	0.7544	0.1	0.7727	0.125	0.78	0.2	0.7978	0.25	0.8081	0.5	0.857	0.75	0.9209	0.8	0.9402	0.875	0.9804	0.9	0.9997	0.95	1.0631	111	0.8291	5.19677
148	0.05	0.7544	0.1	0.7727	0.125	0.78	0.2	0.7978	0.25	0.8081	0.5	0.857	0.75	0.9209	0.8	0.9402	0.875	0.9804	0.9	0.9997	0.95	1.0631	111	0.8291	5.19677
149	0.05	0.7544	0.1	0.7727	0.125	0.78	0.2	0.7978	0.25	0.8081	0.5	0.857	0.75	0.9209	0.8	0.9402	0.875	0.9804	0.9	0.9997	0.95	1.0631	111	0.8291	5.19677
150	0.05	0.7544	0.1	0.7727	0.125	0.78	0.2	0.7978	0.25	0.8081	0.5	0.857	0.75	0.9209	0.8	0.9402	0.875	0.9804	0.9	0.9997	0.95	1.0631	111	0.8291	5.19677
151	0.05	0.7544	0.1	0.7727	0.125	0.78	0.2	0.7978	0.25	0.8081	0.5	0.857	0.75	0.9209	0.8	0.9402	0.875	0.9804	0.9	0.9997	0.95	1.0631	111	0.8291	5.19677
152	0.05	0.7544	0.1	0.7727	0.125	0.78	0.2	0.7978	0.25	0.8081	0.5	0.857	0.75	0.9209	0.8	0.9402	0.875	0.9804	0.9	0.9997	0.95	1.0631	111	0.8291	5.19677
153	0.05	0.7544	0.1	0.7727	0.125	0.78	0.2	0.7978	0.25	0.8081	0.5	0.857	0.75	0.9209	0.8	0.9402	0.875	0.9804	0.9	0.9997	0.95	1.0631	111	0.8291	5.19677
154	0.05	0.7544	0.1	0.7727	0.125	0.78	0.2	0.7978	0.25	0.8081	0.5	0.857	0.75	0.9209	0.8	0.9402	0.875	0.9804	0.9	0.9997	0.95	1.0631	111	0.8291	5.19677
155	0.05	0.7544	0.1	0.7727	0.125	0.78	0.2	0.7978	0.25	0.8081	0.5	0.857	0.75	0.9209	0.8	0.9402	0.875	0.9804	0.9	0.9997	0.95	1.0631	111	0.8291	5.19677
156	0.05	0.7544	0.1	0.7727	0.125	0.78	0.2	0.7978	0.25	0.8081	0.5	0.857	0.75	0.9209	0.8	0.9402	0.875	0.9804	0.9	0.9997	0.95	1.0631	111	0.8291	5.19677
157	0.05	0.7544	0.1	0.7727	0.125	0.78	0.2	0.7978	0.25	0.8081	0.5	0.857	0.75	0.9209	0.8	0.9402	0.875	0.9804	0.9	0.9997	0.95	1.0631	111	0.8291	5.19677
158	0.05	0.7544	0.1	0.7727	0.125	0.78	0.2	0.7978	0.25	0.8081	0.5	0.857	0.75	0.9209	0.8	0.9402	0.875	0.9804	0.9	0.9997	0.95	1.0631	111	0.8291	5.19677
