# Supplementary material for: Time-varying asymmetry and tail thickness in long series of daily financial returns
Source: publisher site journal article supplement (doi:10.1515/snde-2017-0071), 2018-10-02
Supplement: Supplementary file 199 [file thres_ucv.xlsx]

## Sheet: 1
	Var1	Var2	Var3	Var4	Var5	Var6	Var7	Var8	Var9	Var10	Var11	Var12	Var13	Var14	Var15	Var16	Var17	Var18	Var19	Var20	Var21	Var22	Var23	Var24	Var25
1	0	0	0	0	0	0	0	0	0	0	0	0	0	0	0	0	0	0	0	0	0	0	0	0	0
2	0.05	0.569	0.1	0.597	0.125	0.608	0.2	0.6365	0.25	0.653	0.5	0.7345	0.75	0.848	0.8	0.884	0.875	0.961	0.9	0.999	0.95	1.13	111	0.6745	3.15078
3	0.05	0.569	0.1	0.597	0.125	0.608	0.2	0.6365	0.25	0.653	0.5	0.7345	0.75	0.848	0.8	0.884	0.875	0.961	0.9	0.999	0.95	1.13	111	0.6745	3.15078
4	0.05	0.569	0.1	0.597	0.125	0.608	0.2	0.6365	0.25	0.653	0.5	0.7345	0.75	0.848	0.8	0.884	0.875	0.961	0.9	0.999	0.95	1.13	111	0.6745	3.15078
5	0.05	0.569	0.1	0.597	0.125	0.608	0.2	0.6365	0.25	0.653	0.5	0.7345	0.75	0.848	0.8	0.884	0.875	0.961	0.9	0.999	0.95	1.13	111	0.6745	3.15078
6	0.05	0.569	0.1	0.597	0.125	0.608	0.2	0.6365	0.25	0.653	0.5	0.7345	0.75	0.848	0.8	0.884	0.875	0.961	0.9	0.999	0.95	1.13	111	0.6745	3.15078
7	0.05	0.569	0.1	0.597	0.125	0.608	0.2	0.6365	0.25	0.653	0.5	0.7345	0.75	0.848	0.8	0.884	0.875	0.961	0.9	0.999	0.95	1.13	111	0.6745	3.15078
8	0.05	0.569	0.1	0.597	0.125	0.608	0.2	0.6365	0.25	0.653	0.5	0.7345	0.75	0.848	0.8	0.884	0.875	0.961	0.9	0.999	0.95	1.13	111	0.6745	3.15078
9	0.05	0.569	0.1	0.597	0.125	0.608	0.2	0.6365	0.25	0.653	0.5	0.7345	0.75	0.848	0.8	0.884	0.875	0.961	0.9	0.999	0.95	1.13	111	0.6745	3.15078
10	0.05	0.569	0.1	0.597	0.125	0.608	0.2	0.6365	0.25	0.653	0.5	0.7345	0.75	0.848	0.8	0.884	0.875	0.961	0.9	0.999	0.95	1.13	111	0.6745	3.15078
11	0.05	0.569	0.1	0.597	0.125	0.608	0.2	0.6365	0.25	0.653	0.5	0.7345	0.75	0.848	0.8	0.884	0.875	0.961	0.9	0.999	0.95	1.13	111	0.6745	3.15078
12	0.05	0.569	0.1	0.597	0.125	0.608	0.2	0.6365	0.25	0.653	0.5	0.7345	0.75	0.848	0.8	0.884	0.875	0.961	0.9	0.999	0.95	1.13	111	0.6745	3.15078
13	0.05	0.569	0.1	0.597	0.125	0.608	0.2	0.6365	0.25	0.653	0.5	0.7345	0.75	0.848	0.8	0.884	0.875	0.961	0.9	0.999	0.95	1.13	111	0.6745	3.15078
14	0.05	0.569	0.1	0.597	0.125	0.608	0.2	0.6365	0.25	0.653	0.5	0.7345	0.75	0.848	0.8	0.884	0.875	0.961	0.9	0.999	0.95	1.13	111	0.6745	3.15078
15	0.05	0.569	0.1	0.597	0.125	0.608	0.2	0.6365	0.25	0.653	0.5	0.7345	0.75	0.848	0.8	0.884	0.875	0.961	0.9	0.999	0.95	1.13	111	0.6745	3.15078
16	0.05	0.569	0.1	0.597	0.125	0.608	0.2	0.6365	0.25	0.653	0.5	0.7345	0.75	0.848	0.8	0.884	0.875	0.961	0.9	0.999	0.95	1.13	111	0.6745	3.15078
17	0.05	0.569	0.1	0.597	0.125	0.608	0.2	0.6365	0.25	0.653	0.5	0.7345	0.75	0.848	0.8	0.884	0.875	0.961	0.9	0.999	0.95	1.13	111	0.6745	3.15078
18	0.05	0.569	0.1	0.597	0.125	0.608	0.2	0.6365	0.25	0.653	0.5	0.7345	0.75	0.848	0.8	0.884	0.875	0.961	0.9	0.999	0.95	1.13	111	0.6745	3.15078
19	0.05	0.569	0.1	0.597	0.125	0.608	0.2	0.6365	0.25	0.653	0.5	0.7345	0.75	0.848	0.8	0.884	0.875	0.961	0.9	0.999	0.95	1.13	111	0.6745	3.15078
20	0.05	0.569	0.1	0.597	0.125	0.608	0.2	0.6365	0.25	0.653	0.5	0.7345	0.75	0.848	0.8	0.884	0.875	0.961	0.9	0.999	0.95	1.13	111	0.6745	3.15078
21	0.05	0.569	0.1	0.597	0.125	0.608	0.2	0.6365	0.25	0.653	0.5	0.7345	0.75	0.848	0.8	0.884	0.875	0.961	0.9	0.999	0.95	1.13	111	0.6745	3.15078
22	0.05	0.569	0.1	0.597	0.125	0.608	0.2	0.6365	0.25	0.653	0.5	0.7345	0.75	0.848	0.8	0.884	0.875	0.961	0.9	0.999	0.95	1.13	111	0.6745	3.15078
23	0.05	0.569	0.1	0.597	0.125	0.608	0.2	0.6365	0.25	0.653	0.5	0.7345	0.75	0.848	0.8	0.884	0.875	0.961	0.9	0.999	0.95	1.13	111	0.6745	3.15078
24	0.05	0.569	0.1	0.597	0.125	0.608	0.2	0.6365	0.25	0.653	0.5	0.7345	0.75	0.848	0.8	0.884	0.875	0.961	0.9	0.999	0.95	1.13	111	0.6745	3.15078
25	0.05	0.569	0.1	0.597	0.125	0.608	0.2	0.6365	0.25	0.653	0.5	0.7345	0.75	0.848	0.8	0.884	0.875	0.961	0.9	0.999	0.95	1.13	111	0.6745	3.15078
26	0.05	0.569	0.1	0.597	0.125	0.608	0.2	0.6365	0.25	0.653	0.5	0.7345	0.75	0.848	0.8	0.884	0.875	0.961	0.9	0.999	0.95	1.13	111	0.6745	3.15078
27	0.05	0.569	0.1	0.597	0.125	0.608	0.2	0.6365	0.25	0.653	0.5	0.7345	0.75	0.848	0.8	0.884	0.875	0.961	0.9	0.999	0.95	1.13	111	0.6745	3.15078
28	0.05	0.569	0.1	0.597	0.125	0.608	0.2	0.6365	0.25	0.653	0.5	0.7345	0.75	0.848	0.8	0.884	0.875	0.961	0.9	0.999	0.95	1.13	111	0.6745	3.15078
29	0.05	0.569	0.1	0.597	0.125	0.608	0.2	0.6365	0.25	0.653	0.5	0.7345	0.75	0.848	0.8	0.884	0.875	0.961	0.9	0.999	0.95	1.13	111	0.6745	3.15078
30	0.05	0.569	0.1	0.597	0.125	0.608	0.2	0.6365	0.25	0.653	0.5	0.7345	0.75	0.848	0.8	0.884	0.875	0.961	0.9	0.999	0.95	1.13	111	0.6745	3.15078
31	0.05	0.569	0.1	0.597	0.125	0.608	0.2	0.6365	0.25	0.653	0.5	0.7345	0.75	0.848	0.8	0.884	0.875	0.961	0.9	0.999	0.95	1.13	111	0.6745	3.15078
32	0.05	0.569	0.1	0.597	0.125	0.608	0.2	0.6365	0.25	0.653	0.5	0.7345	0.75	0.848	0.8	0.884	0.875	0.961	0.9	0.999	0.95	1.13	111	0.6745	3.15078
33	0.05	0.569	0.1	0.597	0.125	0.608	0.2	0.6365	0.25	0.653	0.5	0.7345	0.75	0.848	0.8	0.884	0.875	0.961	0.9	0.999	0.95	1.13	111	0.6745	3.15078
34	0.05	0.569	0.1	0.597	0.125	0.608	0.2	0.6365	0.25	0.653	0.5	0.7345	0.75	0.848	0.8	0.884	0.875	0.961	0.9	0.999	0.95	1.13	111	0.6745	3.15078
35	0.05	0.569	0.1	0.597	0.125	0.608	0.2	0.6365	0.25	0.653	0.5	0.7345	0.75	0.848	0.8	0.884	0.875	0.961	0.9	0.999	0.95	1.13	111	0.6745	3.15078
36	0.05	0.569	0.1	0.597	0.125	0.608	0.2	0.6365	0.25	0.653	0.5	0.7345	0.75	0.848	0.8	0.884	0.875	0.961	0.9	0.999	0.95	1.13	111	0.6745	3.15078
37	0.05	0.569	0.1	0.597	0.125	0.608	0.2	0.6365	0.25	0.653	0.5	0.7345	0.75	0.848	0.8	0.884	0.875	0.961	0.9	0.999	0.95	1.13	111	0.6745	3.15078
38	0.05	0.569	0.1	0.597	0.125	0.608	0.2	0.6365	0.25	0.653	0.5	0.7345	0.75	0.848	0.8	0.884	0.875	0.961	0.9	0.999	0.95	1.13	111	0.6745	3.15078
39	0.05	0.569	0.1	0.597	0.125	0.608	0.2	0.6365	0.25	0.653	0.5	0.7345	0.75	0.848	0.8	0.884	0.875	0.961	0.9	0.999	0.95	1.13	111	0.6745	3.15078
40	0.05	0.569	0.1	0.597	0.125	0.608	0.2	0.6365	0.25	0.653	0.5	0.7345	0.75	0.848	0.8	0.884	0.875	0.961	0.9	0.999	0.95	1.13	111	0.6745	3.15078
41	0.05	0.569	0.1	0.597	0.125	0.608	0.2	0.6365	0.25	0.653	0.5	0.7345	0.75	0.848	0.8	0.884	0.875	0.961	0.9	0.999	0.95	1.13	111	0.6745	3.15078
42	0.05	0.569	0.1	0.597	0.125	0.608	0.2	0.6365	0.25	0.653	0.5	0.7345	0.75	0.848	0.8	0.884	0.875	0.961	0.9	0.999	0.95	1.13	111	0.6745	3.15078
43	0.05	0.569	0.1	0.597	0.125	0.608	0.2	0.6365	0.25	0.653	0.5	0.7345	0.75	0.848	0.8	0.884	0.875	0.961	0.9	0.999	0.95	1.13	111	0.6745	3.15078
44	0.05	0.569	0.1	0.597	0.125	0.608	0.2	0.6365	0.25	0.653	0.5	0.7345	0.75	0.848	0.8	0.884	0.875	0.961	0.9	0.999	0.95	1.13	111	0.6745	3.15078
45	0.05	0.569	0.1	0.597	0.125	0.608	0.2	0.6365	0.25	0.653	0.5	0.7345	0.75	0.848	0.8	0.884	0.875	0.961	0.9	0.999	0.95	1.13	111	0.6745	3.15078
46	0.05	0.569	0.1	0.597	0.125	0.608	0.2	0.6365	0.25	0.653	0.5	0.7345	0.75	0.848	0.8	0.884	0.875	0.961	0.9	0.999	0.95	1.13	111	0.6745	3.15078
47	0.05	0.569	0.1	0.597	0.125	0.608	0.2	0.6365	0.25	0.653	0.5	0.7345	0.75	0.848	0.8	0.884	0.875	0.961	0.9	0.999	0.95	1.13	111	0.6745	3.15078
48	0.05	0.569	0.1	0.597	0.125	0.608	0.2	0.6365	0.25	0.653	0.5	0.7345	0.75	0.848	0.8	0.884	0.875	0.961	0.9	0.999	0.95	1.13	111	0.6745	3.15078
49	0.05	0.569	0.1	0.597	0.125	0.608	0.2	0.6365	0.25	0.653	0.5	0.7345	0.75	0.848	0.8	0.884	0.875	0.961	0.9	0.999	0.95	1.13	111	0.6745	3.15078
50	0.05	0.569	0.1	0.597	0.125	0.608	0.2	0.6365	0.25	0.653	0.5	0.7345	0.75	0.848	0.8	0.884	0.875	0.961	0.9	0.999	0.95	1.13	111	0.6745	3.15078
51	0.05	0.569	0.1	0.597	0.125	0.608	0.2	0.6365	0.25	0.653	0.5	0.7345	0.75	0.848	0.8	0.884	0.875	0.961	0.9	0.999	0.95	1.13	111	0.6745	3.15078
52	0.05	0.569	0.1	0.597	0.125	0.608	0.2	0.6365	0.25	0.653	0.5	0.7345	0.75	0.848	0.8	0.884	0.875	0.961	0.9	0.999	0.95	1.13	111	0.6745	3.15078
53	0.05	0.569	0.1	0.597	0.125	0.608	0.2	0.6365	0.25	0.653	0.5	0.7345	0.75	0.848	0.8	0.884	0.875	0.961	0.9	0.999	0.95	1.13	111	0.6745	3.15078
54	0.05	0.569	0.1	0.597	0.125	0.608	0.2	0.6365	0.25	0.653	0.5	0.7345	0.75	0.848	0.8	0.884	0.875	0.961	0.9	0.999	0.95	1.13	111	0.6745	3.15078
55	0.05	0.569	0.1	0.597	0.125	0.608	0.2	0.6365	0.25	0.653	0.5	0.7345	0.75	0.848	0.8	0.884	0.875	0.961	0.9	0.999	0.95	1.13	111	0.6745	3.15078
56	0.05	0.569	0.1	0.597	0.125	0.608	0.2	0.6365	0.25	0.653	0.5	0.7345	0.75	0.848	0.8	0.884	0.875	0.961	0.9	0.999	0.95	1.13	111	0.6745	3.15078
57	0.05	0.569	0.1	0.597	0.125	0.608	0.2	0.6365	0.25	0.653	0.5	0.7345	0.75	0.848	0.8	0.884	0.875	0.961	0.9	0.999	0.95	1.13	111	0.6745	3.15078
58	0.05	0.569	0.1	0.597	0.125	0.608	0.2	0.6365	0.25	0.653	0.5	0.7345	0.75	0.848	0.8	0.884	0.875	0.961	0.9	0.999	0.95	1.13	111	0.6745	3.15078
59	0.05	0.569	0.1	0.597	0.125	0.608	0.2	0.6365	0.25	0.653	0.5	0.7345	0.75	0.848	0.8	0.884	0.875	0.961	0.9	0.999	0.95	1.13	111	0.6745	3.15078
60	0.05	0.569	0.1	0.597	0.125	0.608	0.2	0.6365	0.25	0.653	0.5	0.7345	0.75	0.848	0.8	0.884	0.875	0.961	0.9	0.999	0.95	1.13	111	0.6745	3.15078
61	0.05	0.569	0.1	0.597	0.125	0.608	0.2	0.6365	0.25	0.653	0.5	0.7345	0.75	0.848	0.8	0.884	0.875	0.961	0.9	0.999	0.95	1.13	111	0.6745	3.15078
62	0.05	0.569	0.1	0.597	0.125	0.608	0.2	0.6365	0.25	0.653	0.5	0.7345	0.75	0.848	0.8	0.884	0.875	0.961	0.9	0.999	0.95	1.13	111	0.6745	3.15078
63	0.05	0.569	0.1	0.597	0.125	0.608	0.2	0.6365	0.25	0.653	0.5	0.7345	0.75	0.848	0.8	0.884	0.875	0.961	0.9	0.999	0.95	1.13	111	0.6745	3.15078
64	0.05	0.569	0.1	0.597	0.125	0.608	0.2	0.6365	0.25	0.653	0.5	0.7345	0.75	0.848	0.8	0.884	0.875	0.961	0.9	0.999	0.95	1.13	111	0.6745	3.15078
65	0.05	0.569	0.1	0.597	0.125	0.608	0.2	0.6365	0.25	0.653	0.5	0.7345	0.75	0.848	0.8	0.884	0.875	0.961	0.9	0.999	0.95	1.13	111	0.6745	3.15078
66	0.05	0.569	0.1	0.597	0.125	0.608	0.2	0.6365	0.25	0.653	0.5	0.7345	0.75	0.848	0.8	0.884	0.875	0.961	0.9	0.999	0.95	1.13	111	0.6745	3.15078
67	0.05	0.569	0.1	0.597	0.125	0.608	0.2	0.6365	0.25	0.653	0.5	0.7345	0.75	0.848	0.8	0.884	0.875	0.961	0.9	0.999	0.95	1.13	111	0.6745	3.15078
68	0.05	0.569	0.1	0.597	0.125	0.608	0.2	0.6365	0.25	0.653	0.5	0.7345	0.75	0.848	0.8	0.884	0.875	0.961	0.9	0.999	0.95	1.13	111	0.6745	3.15078
69	0.05	0.569	0.1	0.597	0.125	0.608	0.2	0.6365	0.25	0.653	0.5	0.7345	0.75	0.848	0.8	0.884	0.875	0.961	0.9	0.999	0.95	1.13	111	0.6745	3.15078
70	0.05	0.569	0.1	0.597	0.125	0.608	0.2	0.6365	0.25	0.653	0.5	0.7345	0.75	0.848	0.8	0.884	0.875	0.961	0.9	0.999	0.95	1.13	111	0.6745	3.15078
71	0.05	0.569	0.1	0.597	0.125	0.608	0.2	0.6365	0.25	0.653	0.5	0.7345	0.75	0.848	0.8	0.884	0.875	0.961	0.9	0.999	0.95	1.13	111	0.6745	3.15078
72	0.05	0.569	0.1	0.597	0.125	0.608	0.2	0.6365	0.25	0.653	0.5	0.7345	0.75	0.848	0.8	0.884	0.875	0.961	0.9	0.999	0.95	1.13	111	0.6745	3.15078
73	0.05	0.569	0.1	0.597	0.125	0.608	0.2	0.6365	0.25	0.653	0.5	0.7345	0.75	0.848	0.8	0.884	0.875	0.961	0.9	0.999	0.95	1.13	111	0.6745	3.15078
74	0.05	0.569	0.1	0.597	0.125	0.608	0.2	0.6365	0.25	0.653	0.5	0.7345	0.75	0.848	0.8	0.884	0.875	0.961	0.9	0.999	0.95	1.13	111	0.6745	3.15078
75	0.05	0.569	0.1	0.597	0.125	0.608	0.2	0.6365	0.25	0.653	0.5	0.7345	0.75	0.848	0.8	0.884	0.875	0.961	0.9	0.999	0.95	1.13	111	0.6745	3.15078
76	0.05	0.569	0.1	0.597	0.125	0.608	0.2	0.6365	0.25	0.653	0.5	0.7345	0.75	0.848	0.8	0.884	0.875	0.961	0.9	0.999	0.95	1.13	111	0.6745	3.15078
77	0.05	0.569	0.1	0.597	0.125	0.608	0.2	0.6365	0.25	0.653	0.5	0.7345	0.75	0.848	0.8	0.884	0.875	0.961	0.9	0.999	0.95	1.13	111	0.6745	3.15078
78	0.05	0.569	0.1	0.597	0.125	0.608	0.2	0.6365	0.25	0.653	0.5	0.7345	0.75	0.848	0.8	0.884	0.875	0.961	0.9	0.999	0.95	1.13	111	0.6745	3.15078
79	0.05	0.569	0.1	0.597	0.125	0.608	0.2	0.6365	0.25	0.653	0.5	0.7345	0.75	0.848	0.8	0.884	0.875	0.961	0.9	0.999	0.95	1.13	111	0.6745	3.15078
80	0.05	0.569	0.1	0.597	0.125	0.608	0.2	0.6365	0.25	0.653	0.5	0.7345	0.75	0.848	0.8	0.884	0.875	0.961	0.9	0.999	0.95	1.13	111	0.6745	3.15078
81	0.05	0.569	0.1	0.597	0.125	0.608	0.2	0.6365	0.25	0.653	0.5	0.7345	0.75	0.848	0.8	0.884	0.875	0.961	0.9	0.999	0.95	1.13	111	0.6745	3.15078
82	0.05	0.569	0.1	0.597	0.125	0.608	0.2	0.6365	0.25	0.653	0.5	0.7345	0.75	0.848	0.8	0.884	0.875	0.961	0.9	0.999	0.95	1.13	111	0.6745	3.15078
83	0.05	0.569	0.1	0.597	0.125	0.608	0.2	0.6365	0.25	0.653	0.5	0.7345	0.75	0.848	0.8	0.884	0.875	0.961	0.9	0.999	0.95	1.13	111	0.6745	3.15078
84	0.05	0.569	0.1	0.597	0.125	0.608	0.2	0.6365	0.25	0.653	0.5	0.7345	0.75	0.848	0.8	0.884	0.875	0.961	0.9	0.999	0.95	1.13	111	0.6745	3.15078
85	0.05	0.569	0.1	0.597	0.125	0.608	0.2	0.6365	0.25	0.653	0.5	0.7345	0.75	0.848	0.8	0.884	0.875	0.961	0.9	0.999	0.95	1.13	111	0.6745	3.15078
86	0.05	0.569	0.1	0.597	0.125	0.608	0.2	0.6365	0.25	0.653	0.5	0.7345	0.75	0.848	0.8	0.884	0.875	0.961	0.9	0.999	0.95	1.13	111	0.6745	3.15078
87	0.05	0.569	0.1	0.597	0.125	0.608	0.2	0.6365	0.25	0.653	0.5	0.7345	0.75	0.848	0.8	0.884	0.875	0.961	0.9	0.999	0.95	1.13	111	0.6745	3.15078
88	0.05	0.569	0.1	0.597	0.125	0.608	0.2	0.6365	0.25	0.653	0.5	0.7345	0.75	0.848	0.8	0.884	0.875	0.961	0.9	0.999	0.95	1.13	111	0.6745	3.15078
89	0.05	0.569	0.1	0.597	0.125	0.608	0.2	0.6365	0.25	0.653	0.5	0.7345	0.75	0.848	0.8	0.884	0.875	0.961	0.9	0.999	0.95	1.13	111	0.6745	3.15078
90	0.05	0.569	0.1	0.597	0.125	0.608	0.2	0.6365	0.25	0.653	0.5	0.7345	0.75	0.848	0.8	0.884	0.875	0.961	0.9	0.999	0.95	1.13	111	0.6745	3.15078
91	0.05	0.569	0.1	0.597	0.125	0.608	0.2	0.6365	0.25	0.653	0.5	0.7345	0.75	0.848	0.8	0.884	0.875	0.961	0.9	0.999	0.95	1.13	111	0.6745	3.15078
92	0.05	0.569	0.1	0.597	0.125	0.608	0.2	0.6365	0.25	0.653	0.5	0.7345	0.75	0.848	0.8	0.884	0.875	0.961	0.9	0.999	0.95	1.13	111	0.6745	3.15078
93	0.05	0.569	0.1	0.597	0.125	0.608	0.2	0.6365	0.25	0.653	0.5	0.7345	0.75	0.848	0.8	0.884	0.875	0.961	0.9	0.999	0.95	1.13	111	0.6745	3.15078
94	0.05	0.569	0.1	0.597	0.125	0.608	0.2	0.6365	0.25	0.653	0.5	0.7345	0.75	0.848	0.8	0.884	0.875	0.961	0.9	0.999	0.95	1.13	111	0.6745	3.15078
95	0.05	0.569	0.1	0.597	0.125	0.608	0.2	0.6365	0.25	0.653	0.5	0.7345	0.75	0.848	0.8	0.884	0.875	0.961	0.9	0.999	0.95	1.13	111	0.6745	3.15078
96	0.05	0.569	0.1	0.597	0.125	0.608	0.2	0.6365	0.25	0.653	0.5	0.7345	0.75	0.848	0.8	0.884	0.875	0.961	0.9	0.999	0.95	1.13	111	0.6745	3.15078
97	0.05	0.569	0.1	0.597	0.125	0.608	0.2	0.6365	0.25	0.653	0.5	0.7345	0.75	0.848	0.8	0.884	0.875	0.961	0.9	0.999	0.95	1.13	111	0.6745	3.15078
98	0.05	0.569	0.1	0.597	0.125	0.608	0.2	0.6365	0.25	0.653	0.5	0.7345	0.75	0.848	0.8	0.884	0.875	0.961	0.9	0.999	0.95	1.13	111	0.6745	3.15078
99	0.05	0.569	0.1	0.597	0.125	0.608	0.2	0.6365	0.25	0.653	0.5	0.7345	0.75	0.848	0.8	0.884	0.875	0.961	0.9	0.999	0.95	1.13	111	0.6745	3.15078
100	0.05	0.569	0.1	0.597	0.125	0.608	0.2	0.6365	0.25	0.653	0.5	0.7345	0.75	0.848	0.8	0.884	0.875	0.961	0.9	0.999	0.95	1.13	111	0.6745	3.15078
101	0.05	0.569	0.1	0.597	0.125	0.608	0.2	0.6365	0.25	0.653	0.5	0.7345	0.75	0.848	0.8	0.884	0.875	0.961	0.9	0.999	0.95	1.13	111	0.6745	3.15078
102	0.05	0.569	0.1	0.597	0.125	0.608	0.2	0.6365	0.25	0.653	0.5	0.7345	0.75	0.848	0.8	0.884	0.875	0.961	0.9	0.999	0.95	1.13	111	0.6745	3.15078
103	0.05	0.569	0.1	0.597	0.125	0.608	0.2	0.6365	0.25	0.653	0.5	0.7345	0.75	0.848	0.8	0.884	0.875	0.961	0.9	0.999	0.95	1.13	111	0.6745	3.15078
104	0.05	0.569	0.1	0.597	0.125	0.608	0.2	0.6365	0.25	0.653	0.5	0.7345	0.75	0.848	0.8	0.884	0.875	0.961	0.9	0.999	0.95	1.13	111	0.6745	3.15078
105	0.05	0.569	0.1	0.597	0.125	0.608	0.2	0.6365	0.25	0.653	0.5	0.7345	0.75	0.848	0.8	0.884	0.875	0.961	0.9	0.999	0.95	1.13	111	0.6745	3.15078
106	0.05	0.569	0.1	0.597	0.125	0.608	0.2	0.6365	0.25	0.653	0.5	0.7345	0.75	0.848	0.8	0.884	0.875	0.961	0.9	0.999	0.95	1.13	111	0.6745	3.15078
107	0.05	0.569	0.1	0.597	0.125	0.608	0.2	0.6365	0.25	0.653	0.5	0.7345	0.75	0.848	0.8	0.884	0.875	0.961	0.9	0.999	0.95	1.13	111	0.6745	3.15078
108	0.05	0.569	0.1	0.597	0.125	0.608	0.2	0.6365	0.25	0.653	0.5	0.7345	0.75	0.848	0.8	0.884	0.875	0.961	0.9	0.999	0.95	1.13	111	0.6745	3.15078
109	0.05	0.569	0.1	0.597	0.125	0.608	0.2	0.6365	0.25	0.653	0.5	0.7345	0.75	0.848	0.8	0.884	0.875	0.961	0.9	0.999	0.95	1.13	111	0.6745	3.15078
110	0.05	0.569	0.1	0.597	0.125	0.608	0.2	0.6365	0.25	0.653	0.5	0.7345	0.75	0.848	0.8	0.884	0.875	0.961	0.9	0.999	0.95	1.13	111	0.6745	3.15078
111	0.05	0.569	0.1	0.597	0.125	0.608	0.2	0.6365	0.25	0.653	0.5	0.7345	0.75	0.848	0.8	0.884	0.875	0.961	0.9	0.999	0.95	1.13	111	0.6745	3.15078
112	0.05	0.569	0.1	0.597	0.125	0.608	0.2	0.6365	0.25	0.653	0.5	0.7345	0.75	0.848	0.8	0.884	0.875	0.961	0.9	0.999	0.95	1.13	111	0.6745	3.15078
113	0.05	0.569	0.1	0.597	0.125	0.608	0.2	0.6365	0.25	0.653	0.5	0.7345	0.75	0.848	0.8	0.884	0.875	0.961	0.9	0.999	0.95	1.13	111	0.6745	3.15078
114	0.05	0.569	0.1	0.597	0.125	0.608	0.2	0.6365	0.25	0.653	0.5	0.7345	0.75	0.848	0.8	0.884	0.875	0.961	0.9	0.999	0.95	1.13	111	0.6745	3.15078
115	0.05	0.569	0.1	0.597	0.125	0.608	0.2	0.6365	0.25	0.653	0.5	0.7345	0.75	0.848	0.8	0.884	0.875	0.961	0.9	0.999	0.95	1.13	111	0.6745	3.15078
116	0.05	0.569	0.1	0.597	0.125	0.608	0.2	0.6365	0.25	0.653	0.5	0.7345	0.75	0.848	0.8	0.884	0.875	0.961	0.9	0.999	0.95	1.13	111	0.6745	3.15078
117	0.05	0.569	0.1	0.597	0.125	0.608	0.2	0.6365	0.25	0.653	0.5	0.7345	0.75	0.848	0.8	0.884	0.875	0.961	0.9	0.999	0.95	1.13	111	0.6745	3.15078
118	0.05	0.569	0.1	0.597	0.125	0.608	0.2	0.6365	0.25	0.653	0.5	0.7345	0.75	0.848	0.8	0.884	0.875	0.961	0.9	0.999	0.95	1.13	111	0.6745	3.15078
119	0.05	0.569	0.1	0.597	0.125	0.608	0.2	0.6365	0.25	0.653	0.5	0.7345	0.75	0.848	0.8	0.884	0.875	0.961	0.9	0.999	0.95	1.13	111	0.6745	3.15078
120	0.05	0.569	0.1	0.597	0.125	0.608	0.2	0.6365	0.25	0.653	0.5	0.7345	0.75	0.848	0.8	0.884	0.875	0.961	0.9	0.999	0.95	1.13	111	0.6745	3.15078
121	0.05	0.569	0.1	0.597	0.125	0.608	0.2	0.6365	0.25	0.653	0.5	0.7345	0.75	0.848	0.8	0.884	0.875	0.961	0.9	0.999	0.95	1.13	111	0.6745	3.15078
122	0.05	0.569	0.1	0.597	0.125	0.608	0.2	0.6365	0.25	0.653	0.5	0.7345	0.75	0.848	0.8	0.884	0.875	0.961	0.9	0.999	0.95	1.13	111	0.6745	3.15078
123	0.05	0.569	0.1	0.597	0.125	0.608	0.2	0.6365	0.25	0.653	0.5	0.7345	0.75	0.848	0.8	0.884	0.875	0.961	0.9	0.999	0.95	1.13	111	0.6745	3.15078
124	0.05	0.569	0.1	0.597	0.125	0.608	0.2	0.6365	0.25	0.653	0.5	0.7345	0.75	0.848	0.8	0.884	0.875	0.961	0.9	0.999	0.95	1.13	111	0.6745	3.15078
125	0.05	0.569	0.1	0.597	0.125	0.608	0.2	0.6365	0.25	0.653	0.5	0.7345	0.75	0.848	0.8	0.884	0.875	0.961	0.9	0.999	0.95	1.13	111	0.6745	3.15078
126	0.05	0.569	0.1	0.597	0.125	0.608	0.2	0.6365	0.25	0.653	0.5	0.7345	0.75	0.848	0.8	0.884	0.875	0.961	0.9	0.999	0.95	1.13	111	0.6745	3.15078
127	0.05	0.569	0.1	0.597	0.125	0.608	0.2	0.6365	0.25	0.653	0.5	0.7345	0.75	0.848	0.8	0.884	0.875	0.961	0.9	0.999	0.95	1.13	111	0.6745	3.15078
128	0.05	0.569	0.1	0.597	0.125	0.608	0.2	0.6365	0.25	0.653	0.5	0.7345	0.75	0.848	0.8	0.884	0.875	0.961	0.9	0.999	0.95	1.13	111	0.6745	3.15078
129	0.05	0.569	0.1	0.597	0.125	0.608	0.2	0.6365	0.25	0.653	0.5	0.7345	0.75	0.848	0.8	0.884	0.875	0.961	0.9	0.999	0.95	1.13	111	0.6745	3.15078
130	0.05	0.569	0.1	0.597	0.125	0.608	0.2	0.6365	0.25	0.653	0.5	0.7345	0.75	0.848	0.8	0.884	0.875	0.961	0.9	0.999	0.95	1.13	111	0.6745	3.15078
131	0.05	0.569	0.1	0.597	0.125	0.608	0.2	0.6365	0.25	0.653	0.5	0.7345	0.75	0.848	0.8	0.884	0.875	0.961	0.9	0.999	0.95	1.13	111	0.6745	3.15078
132	0.05	0.569	0.1	0.597	0.125	0.608	0.2	0.6365	0.25	0.653	0.5	0.7345	0.75	0.848	0.8	0.884	0.875	0.961	0.9	0.999	0.95	1.13	111	0.6745	3.15078
133	0.05	0.569	0.1	0.597	0.125	0.608	0.2	0.6365	0.25	0.653	0.5	0.7345	0.75	0.848	0.8	0.884	0.875	0.961	0.9	0.999	0.95	1.13	111	0.6745	3.15078
134	0.05	0.569	0.1	0.597	0.125	0.608	0.2	0.6365	0.25	0.653	0.5	0.7345	0.75	0.848	0.8	0.884	0.875	0.961	0.9	0.999	0.95	1.13	111	0.6745	3.15078
135	0.05	0.569	0.1	0.597	0.125	0.608	0.2	0.6365	0.25	0.653	0.5	0.7345	0.75	0.848	0.8	0.884	0.875	0.961	0.9	0.999	0.95	1.13	111	0.6745	3.15078
136	0.05	0.569	0.1	0.597	0.125	0.608	0.2	0.6365	0.25	0.653	0.5	0.7345	0.75	0.848	0.8	0.884	0.875	0.961	0.9	0.999	0.95	1.13	111	0.6745	3.15078
137	0.05	0.569	0.1	0.597	0.125	0.608	0.2	0.6365	0.25	0.653	0.5	0.7345	0.75	0.848	0.8	0.884	0.875	0.961	0.9	0.999	0.95	1.13	111	0.6745	3.15078
138	0.05	0.569	0.1	0.597	0.125	0.608	0.2	0.6365	0.25	0.653	0.5	0.7345	0.75	0.848	0.8	0.884	0.875	0.961	0.9	0.999	0.95	1.13	111	0.6745	3.15078
139	0.05	0.569	0.1	0.597	0.125	0.608	0.2	0.6365	0.25	0.653	0.5	0.7345	0.75	0.848	0.8	0.884	0.875	0.961	0.9	0.999	0.95	1.13	111	0.6745	3.15078
140	0.05	0.569	0.1	0.597	0.125	0.608	0.2	0.6365	0.25	0.653	0.5	0.7345	0.75	0.848	0.8	0.884	0.875	0.961	0.9	0.999	0.95	1.13	111	0.6745	3.15078
141	0.05	0.569	0.1	0.597	0.125	0.608	0.2	0.6365	0.25	0.653	0.5	0.7345	0.75	0.848	0.8	0.884	0.875	0.961	0.9	0.999	0.95	1.13	111	0.6745	3.15078
142	0.05	0.569	0.1	0.597	0.125	0.608	0.2	0.6365	0.25	0.653	0.5	0.7345	0.75	0.848	0.8	0.884	0.875	0.961	0.9	0.999	0.95	1.13	111	0.6745	3.15078
143	0.05	0.569	0.1	0.597	0.125	0.608	0.2	0.6365	0.25	0.653	0.5	0.7345	0.75	0.848	0.8	0.884	0.875	0.961	0.9	0.999	0.95	1.13	111	0.6745	3.15078
144	0.05	0.569	0.1	0.597	0.125	0.608	0.2	0.6365	0.25	0.653	0.5	0.7345	0.75	0.848	0.8	0.884	0.875	0.961	0.9	0.999	0.95	1.13	111	0.6745	3.15078
145	0.05	0.569	0.1	0.597	0.125	0.608	0.2	0.6365	0.25	0.653	0.5	0.7345	0.75	0.848	0.8	0.884	0.875	0.961	0.9	0.999	0.95	1.13	111	0.6745	3.15078
146	0.05	0.569	0.1	0.597	0.125	0.608	0.2	0.6365	0.25	0.653	0.5	0.7345	0.75	0.848	0.8	0.884	0.875	0.961	0.9	0.999	0.95	1.13	111	0.6745	3.15078
147	0.05	0.569	0.1	0.597	0.125	0.608	0.2	0.6365	0.25	0.653	0.5	0.7345	0.75	0.848	0.8	0.884	0.875	0.961	0.9	0.999	0.95	1.13	111	0.6745	3.15078
148	0.05	0.569	0.1	0.597	0.125	0.608	0.2	0.6365	0.25	0.653	0.5	0.7345	0.75	0.848	0.8	0.884	0.875	0.961	0.9	0.999	0.95	1.13	111	0.6745	3.15078
149	0.05	0.569	0.1	0.597	0.125	0.608	0.2	0.6365	0.25	0.653	0.5	0.7345	0.75	0.848	0.8	0.884	0.875	0.961	0.9	0.999	0.95	1.13	111	0.6745	3.15078
150	0.05	0.569	0.1	0.597	0.125	0.608	0.2	0.6365	0.25	0.653	0.5	0.7345	0.75	0.848	0.8	0.884	0.875	0.961	0.9	0.999	0.95	1.13	111	0.6745	3.15078
151	0.05	0.569	0.1	0.597	0.125	0.608	0.2	0.6365	0.25	0.653	0.5	0.7345	0.75	0.848	0.8	0.884	0.875	0.961	0.9	0.999	0.95	1.13	111	0.6745	3.15078
152	0.05	0.569	0.1	0.597	0.125	0.608	0.2	0.6365	0.25	0.653	0.5	0.7345	0.75	0.848	0.8	0.884	0.875	0.961	0.9	0.999	0.95	1.13	111	0.6745	3.15078
153	0.05	0.569	0.1	0.597	0.125	0.608	0.2	0.6365	0.25	0.653	0.5	0.7345	0.75	0.848	0.8	0.884	0.875	0.961	0.9	0.999	0.95	1.13	111	0.6745	3.15078
154	0.05	0.569	0.1	0.597	0.125	0.608	0.2	0.6365	0.25	0.653	0.5	0.7345	0.75	0.848	0.8	0.884	0.875	0.961	0.9	0.999	0.95	1.13	111	0.6745	3.15078
155	0.05	0.569	0.1	0.597	0.125	0.608	0.2	0.6365	0.25	0.653	0.5	0.7345	0.75	0.848	0.8	0.884	0.875	0.961	0.9	0.999	0.95	1.13	111	0.6745	3.15078
156	0.05	0.569	0.1	0.597	0.125	0.608	0.2	0.6365	0.25	0.653	0.5	0.7345	0.75	0.848	0.8	0.884	0.875	0.961	0.9	0.999	0.95	1.13	111	0.6745	3.15078
157	0.05	0.569	0.1	0.597	0.125	0.608	0.2	0.6365	0.25	0.653	0.5	0.7345	0.75	0.848	0.8	0.884	0.875	0.961	0.9	0.999	0.95	1.13	111	0.6745	3.15078
158	0.05	0.569	0.1	0.597	0.125	0.608	0.2	0.6365	0.25	0.653	0.5	0.7345	0.75	0.848	0.8	0.884	0.875	0.961	0.9	0.999	0.95	1.13	111	0.6745	3.15078
