# Supplementary material for: Time-varying asymmetry and tail thickness in long series of daily financial returns
Source: publisher site journal article supplement (doi:10.1515/snde-2017-0071), 2018-10-02
Supplement: Supplementary file 205 [file acc_summary.xlsx]

## Sheet: 1
	Var1	Var2
1	0.142473	0.742116
2	0.119981	0.742116
3	0.132918	0.742116
4	0.038446	0.742116
5	0.142796	0.742116
6	0.119903	0.742116
7	0.150012	0.742116
8	0.15347	0.742116
