# Supplementary material for: Time-varying asymmetry and tail thickness in long series of daily financial returns
Source: publisher site journal article supplement (doi:10.1515/snde-2017-0071), 2018-10-02
Supplement: Supplementary file 207 [file add_par_res.xlsx]

## Sheet: 1
	(a1+a2)/2+b1	a0/[1-(a1+a2)/2-b1]	[a0/(1-(a1+a2)/2-b1)]^0.5	alpha1/alpha2	ni2/ni1
1	0.993612	0.904739	0.935711	5.3689	1.39695
2	0.00200238	0.764691	0.170741	1.06404	0.183873
