# Supplementary material for: Time-varying asymmetry and tail thickness in long series of daily financial returns
Source: publisher site journal article supplement (doi:10.1515/snde-2017-0071), 2018-10-02
Supplement: Supplementary file 209 [file cvm1.xlsx]

## Sheet: 1
	Var1	Var2	Var3	Var4	Var5	Var6	Var7	Var8	Var9	Var10	Var11
1	0.000322798	-3.36965e-05	-0.000959905	6.73663e-06	0.000179893	0.000114223	-0.00047778	-5.72601e-05	-3.6086e-05	1.83999e-06	0.000147183
2	-3.36965e-05	0.000271403	0.000182725	0.0001141	-8.10212e-05	-0.000141504	4.87967e-05	-6.45936e-06	1.86625e-05	-2.74235e-05	7.39453e-05
3	-0.000959905	0.000182725	0.0247596	0.00617066	-0.0087532	0.00448443	0.00144561	-0.000648503	-0.000815473	-2.47473e-05	0.00226904
4	6.73663e-06	0.0001141	0.00617066	0.00632018	-0.00508911	0.00383786	-8.69355e-05	-0.00111363	-0.000306053	-2.12407e-05	0.00227697
5	0.000179893	-8.10212e-05	-0.0087532	-0.00508911	0.00591454	-0.00832016	-0.00032628	-0.000227454	-8.07248e-05	1.57805e-05	-0.00253335
6	0.000114223	-0.000141504	0.00448443	0.00383786	-0.00832016	0.0389211	-3.35165e-05	0.000157199	-0.000533592	4.22202e-05	0.00594937
7	-0.00047778	4.87967e-05	0.00144561	-8.69355e-05	-0.00032628	-3.35165e-05	0.000796371	0.000224679	-1.84634e-05	-3.03421e-05	-0.000226674
8	-5.72601e-05	-6.45936e-06	-0.000648503	-0.00111363	-0.000227454	0.000157199	0.000224679	0.012467	-0.00312745	0.00174472	0.000342319
9	-3.6086e-05	1.86625e-05	-0.000815473	-0.000306053	-8.07248e-05	-0.000533592	-1.84634e-05	-0.00312745	0.0168644	-0.00201295	-0.00192359
10	1.83999e-06	-2.74235e-05	-2.47473e-05	-2.12407e-05	1.57805e-05	4.22202e-05	-3.03421e-05	0.00174472	-0.00201295	0.000682467	4.99021e-05
11	0.000147183	7.39453e-05	0.00226904	0.00227697	-0.00253335	0.00594937	-0.000226674	0.000342319	-0.00192359	4.99021e-05	0.351669
