# Supplementary material for: Time-varying asymmetry and tail thickness in long series of daily financial returns
Source: publisher site journal article supplement (doi:10.1515/snde-2017-0071), 2018-10-02
Supplement: Supplementary file 213 [file cvm_ip.xlsx]

## Sheet: 1
	delta	rho	alpha0	alpha1-	beta1	alpha1+	lambda1	ni1	ni2	a00	h0
1	0.000322798	-1.64099e-05	-4.96824e-06	5.71272e-07	1.10207e-05	1.99123e-06	-0.00047778	-0.000202351	-0.000200018	5.85204e-07	4.13975e-05
2	-1.64099e-05	6.43801e-05	4.62409e-07	4.96231e-06	-2.41459e-06	-1.24168e-06	2.37607e-05	-1.18712e-05	5.11156e-05	-4.24793e-06	2.79022e-05
3	-4.96824e-06	4.62409e-07	6.66938e-07	2.87591e-06	-2.79332e-06	4.43639e-07	7.47717e-06	-1.17949e-05	-2.38644e-05	-4.32335e-08	1.04678e-05
4	5.71272e-07	4.96231e-06	2.87591e-06	5.04066e-05	-2.78105e-05	6.39949e-06	-7.69105e-06	-0.000343735	-0.000156331	-5.85227e-07	0.000149799
5	1.10207e-05	-2.41459e-06	-2.79332e-06	-2.78105e-05	2.21698e-05	-9.40314e-06	-1.9992e-05	-4.86988e-05	-2.88071e-05	3.12948e-07	-0.000110253
6	1.99123e-06	-1.24168e-06	4.43639e-07	6.39949e-06	-9.40314e-06	1.30075e-05	-5.27072e-07	7.20472e-06	-4.85345e-05	1.98282e-07	6.4017e-05
7	-0.00047778	2.37607e-05	7.47717e-06	-7.69105e-06	-1.9992e-05	-5.27072e-07	0.000796371	0.000783416	-9.4444e-05	-9.65128e-06	-8.34587e-05
8	-0.000202351	-1.18712e-05	-1.17949e-05	-0.000343735	-4.86988e-05	7.20472e-06	0.000783416	0.152009	-0.0609927	0.00193088	-0.000106557
9	-0.000200018	5.11156e-05	-2.38644e-05	-0.000156331	-2.88071e-05	-4.85345e-05	-9.4444e-05	-0.0609927	0.540165	-0.00360009	-0.0053242
10	5.85204e-07	-4.24793e-06	-4.32335e-08	-5.85227e-07	3.12948e-07	1.98282e-07	-9.65128e-06	0.00193088	-0.00360009	6.90536e-05	7.95523e-06
11	4.13975e-05	2.79022e-05	1.04678e-05	0.000149799	-0.000110253	6.4017e-05	-8.34587e-05	-0.000106557	-0.0053242	7.95523e-06	0.101676
