# Supplementary material for: Time-varying asymmetry and tail thickness in long series of daily financial returns
Source: publisher site journal article supplement (doi:10.1515/snde-2017-0071), 2018-10-02
Supplement: Supplementary file 229 [file m1.xlsx]

## Sheet: 1
	Var1
1	0.0170062
2	0.323593
3	-5.30375
4	-2.2309
5	2.68627
6	-3.98444
7	0.0218981
8	1.2357
9	1.71229
10	0.00162982
11	-1.10924
12	0.0170062
13	0.1604
14	0.00497289
15	0.0970102
16	0.936212
17	0.0182631
18	0.0218981
19	5.44179
20	7.54263
21	0.500519
22	0.329809
