# Supplementary material for: Time-varying asymmetry and tail thickness in long series of daily financial returns
Source: publisher site journal article supplement (doi:10.1515/snde-2017-0071), 2018-10-02
Supplement: Supplementary file 231 [file mq.xlsx]

## Sheet: 1
	quantile	delta	rho	alpha0	alpha1-	beta1	alpha1+	lambda1	ni1	ni2	a00	h0
1	0.005	-0.03069	0.140155	0.003354	0.081933	0.921482	0.010659	-0.04859	4.5902	6.0185	0.47907	0.0887
2	0.01	-0.02587	0.142035	0.003511	0.083373	0.922903	0.011284	-0.04217	4.6616	6.145	0.48129	0.1028
3	0.015	-0.02311	0.143275	0.003617	0.084345	0.92379	0.011731	-0.0379	4.7123	6.2235	0.48259	0.1137
4	0.02	-0.02089	0.144185	0.00369	0.085122	0.924425	0.012093	-0.03459	4.7473	6.284	0.48358	0.1222
5	0.025	-0.01909	0.144945	0.00375	0.085747	0.924907	0.012385	-0.0321	4.7763	6.332	0.484365	0.1298
6	0.03	-0.0176	0.14559	0.003802	0.08626	0.925322	0.012632	-0.02988	4.8009	6.3725	0.485005	0.1366
7	0.035	-0.01629	0.146135	0.003848	0.086716	0.92569	0.012842	-0.02792	4.824	6.4085	0.48556	0.1429
8	0.04	-0.01517	0.146615	0.0038865	0.087109	0.926001	0.013033	-0.0262	4.845	6.4425	0.486075	0.1493
9	0.045	-0.01416	0.147085	0.0039255	0.08749	0.926281	0.013205	-0.02465	4.8634	6.474	0.48652	0.1553
10	0.05	-0.01321	0.147515	0.0039605	0.087844	0.926542	0.013362	-0.02323	4.8805	6.501	0.486945	0.1606
11	0.055	-0.01236	0.1479	0.0039935	0.088159	0.926778	0.013509	-0.02192	4.896	6.5275	0.487325	0.1657
12	0.06	-0.01159	0.148245	0.0040225	0.08846	0.926998	0.013644	-0.02068	4.91	6.553	0.487715	0.1708
13	0.065	-0.01084	0.14859	0.0040505	0.088733	0.927202	0.013772	-0.01957	4.9233	6.576	0.48806	0.1755
14	0.07	-0.01015	0.14889	0.004076	0.088987	0.92739	0.013901	-0.01852	4.9365	6.598	0.488375	0.18
15	0.075	-0.00947	0.149195	0.0041015	0.089227	0.92757	0.014016	-0.01757	4.9487	6.6185	0.48868	0.1842
16	0.08	-0.00884	0.14949	0.0041255	0.089453	0.927752	0.01413	-0.01665	4.9601	6.6385	0.48897	0.1884
17	0.085	-0.00822	0.149755	0.0041485	0.089663	0.927921	0.014237	-0.0158	4.9714	6.6575	0.489245	0.1927
18	0.09	-0.00766	0.15004	0.0041705	0.089861	0.928082	0.014342	-0.01496	4.9817	6.6765	0.48951	0.1968
19	0.095	-0.00711	0.1503	0.0041915	0.09006	0.928229	0.014441	-0.01416	4.9921	6.6945	0.489765	0.2009
20	0.1	-0.00657	0.150545	0.0042115	0.090254	0.928371	0.014535	-0.01338	5.0017	6.712	0.49	0.2048
21	0.105	-0.00606	0.150785	0.0042305	0.090439	0.928508	0.014626	-0.01263	5.0114	6.7285	0.49023	0.2086
22	0.11	-0.00557	0.151005	0.004249	0.090621	0.92864	0.014715	-0.01189	5.0209	6.745	0.490455	0.2124
23	0.115	-0.00509	0.15122	0.004268	0.090788	0.92877	0.014804	-0.01121	5.03	6.7615	0.490665	0.216
24	0.12	-0.0046	0.151425	0.0042865	0.090953	0.9289	0.014893	-0.01053	5.0385	6.777	0.49088	0.2196
25	0.125	-0.00415	0.151625	0.0043035	0.091126	0.92902	0.014977	-0.00985	5.0469	6.792	0.49109	0.2232
26	0.13	-0.00371	0.151825	0.004321	0.091282	0.929137	0.015059	-0.00921	5.0553	6.806	0.491285	0.2268
27	0.135	-0.00328	0.15202	0.004338	0.091443	0.929252	0.015136	-0.00856	5.0632	6.8195	0.49147	0.2302
28	0.14	-0.00289	0.152205	0.004354	0.091593	0.929367	0.015213	-0.00792	5.0714	6.8335	0.49166	0.2337
29	0.145	-0.00248	0.15239	0.0043695	0.091736	0.929481	0.015292	-0.00731	5.0791	6.847	0.491845	0.2371
30	0.15	-0.00208	0.152565	0.004385	0.091877	0.929585	0.015366	-0.00671	5.0863	6.8605	0.49202	0.2406
31	0.155	-0.00169	0.152735	0.0044	0.092023	0.929687	0.015439	-0.00614	5.0935	6.874	0.492195	0.2441
32	0.16	-0.0013	0.1529	0.004416	0.092159	0.929785	0.01551	-0.00556	5.1003	6.887	0.49237	0.2476
33	0.165	-0.00093	0.153065	0.0044305	0.092294	0.929884	0.015579	-0.00499	5.1075	6.9	0.492535	0.2509
34	0.17	-0.00056	0.15324	0.0044455	0.09243	0.929977	0.015647	-0.00444	5.1146	6.9125	0.4927	0.2543
35	0.175	-0.00019	0.153405	0.00446	0.092561	0.930071	0.015713	-0.00391	5.1217	6.925	0.49286	0.2576
36	0.18	0.00015	0.15356	0.004474	0.09269	0.930164	0.01578	-0.00339	5.1286	6.9375	0.493015	0.2609
37	0.185	0.00051	0.15371	0.0044885	0.09281	0.93026	0.015845	-0.00288	5.1354	6.95	0.49317	0.2641
38	0.19	0.00084	0.15387	0.0045025	0.092932	0.930344	0.015909	-0.00236	5.1418	6.962	0.493325	0.2673
39	0.195	0.00117	0.154025	0.004516	0.093057	0.930431	0.015971	-0.00183	5.1483	6.9735	0.493475	0.2705
40	0.2	0.00151	0.154175	0.004529	0.093179	0.93052	0.016033	-0.00132	5.1547	6.985	0.49362	0.2737
41	0.205	0.00183	0.154315	0.0045425	0.093296	0.930609	0.016095	-0.00086	5.1613	6.997	0.493755	0.2769
42	0.21	0.00214	0.15446	0.0045555	0.093417	0.930702	0.016154	-0.00037	5.1677	7.008	0.493895	0.2802
43	0.215	0.00246	0.154595	0.0045685	0.093537	0.930789	0.016213	0.00011	5.1737	7.0195	0.494035	0.2835
44	0.22	0.00277	0.15473	0.0045815	0.093649	0.930873	0.016271	0.00059	5.1798	7.031	0.494175	0.2867
45	0.225	0.00308	0.15487	0.0045945	0.093763	0.930951	0.016328	0.00107	5.1857	7.0425	0.494305	0.2898
46	0.23	0.00336	0.15501	0.0046065	0.09388	0.93103	0.016386	0.00154	5.1917	7.0535	0.494445	0.2929
47	0.235	0.00368	0.15515	0.0046195	0.093992	0.931107	0.016443	0.00198	5.1974	7.065	0.494585	0.2961
48	0.24	0.00398	0.155285	0.0046315	0.094098	0.931185	0.016499	0.00242	5.2032	7.076	0.49472	0.299
49	0.245	0.00427	0.155415	0.0046435	0.094206	0.931262	0.016555	0.00287	5.2092	7.0865	0.494855	0.302
50	0.25	0.00457	0.155545	0.0046555	0.094306	0.931345	0.016607	0.00329	5.2149	7.097	0.49499	0.3051
51	0.255	0.00485	0.155675	0.004667	0.094412	0.93142	0.016661	0.00373	5.2203	7.107	0.49512	0.3081
52	0.26	0.00514	0.1558	0.004679	0.094523	0.931499	0.016712	0.00415	5.2258	7.1175	0.49525	0.311
53	0.265	0.00544	0.15593	0.0046905	0.094625	0.931574	0.016766	0.00458	5.2315	7.1275	0.49538	0.3139
54	0.27	0.00571	0.15605	0.0047025	0.094733	0.931648	0.016821	0.00501	5.237	7.1375	0.49551	0.3169
55	0.275	0.00599	0.15618	0.0047135	0.09484	0.931722	0.016874	0.00543	5.2422	7.1475	0.495635	0.3198
56	0.28	0.00625	0.1563	0.004725	0.094945	0.931796	0.016925	0.00585	5.2477	7.1575	0.49576	0.3227
57	0.285	0.00652	0.15642	0.004737	0.095045	0.931867	0.016978	0.00628	5.2531	7.167	0.49588	0.3255
58	0.29	0.00679	0.15654	0.004748	0.095147	0.931941	0.017027	0.00669	5.2582	7.177	0.496005	0.3283
59	0.295	0.00705	0.156655	0.004759	0.095249	0.932011	0.017076	0.00713	5.2636	7.1875	0.49612	0.3312
60	0.3	0.00731	0.15677	0.00477	0.095346	0.932085	0.017126	0.00755	5.2689	7.1975	0.49624	0.3341
61	0.305	0.00757	0.156895	0.004781	0.095444	0.932156	0.017176	0.00795	5.2739	7.207	0.496355	0.337
62	0.31	0.00782	0.15701	0.004792	0.095545	0.932225	0.017226	0.00836	5.2792	7.2165	0.496475	0.3398
63	0.315	0.00807	0.157125	0.0048035	0.095645	0.932297	0.017275	0.00877	5.2841	7.226	0.496595	0.3426
64	0.32	0.00832	0.157245	0.004814	0.09574	0.932366	0.017323	0.00915	5.2891	7.2355	0.49671	0.3457
65	0.325	0.00856	0.157365	0.004825	0.095838	0.932434	0.017374	0.00955	5.2944	7.245	0.496825	0.3485
66	0.33	0.00881	0.157475	0.004836	0.095937	0.9325	0.017425	0.00993	5.2994	7.2545	0.49694	0.3514
67	0.335	0.00907	0.15758	0.0048465	0.096032	0.932566	0.017474	0.01032	5.3041	7.2635	0.49706	0.3542
68	0.34	0.00932	0.157695	0.004857	0.096126	0.932631	0.017522	0.01071	5.309	7.2725	0.49717	0.3571
69	0.345	0.00957	0.15781	0.0048675	0.096224	0.932698	0.01757	0.01109	5.3143	7.282	0.49728	0.36
70	0.35	0.00981	0.15792	0.004878	0.096317	0.932764	0.017618	0.01147	5.319	7.291	0.497395	0.363
71	0.355	0.01006	0.15803	0.0048885	0.096411	0.93283	0.017665	0.01185	5.3238	7.3	0.49751	0.366
72	0.36	0.0103	0.158135	0.0048995	0.096502	0.932895	0.017712	0.01224	5.3287	7.309	0.497625	0.3689
73	0.365	0.01054	0.158245	0.00491	0.096597	0.932957	0.01776	0.01261	5.3335	7.319	0.497735	0.3719
74	0.37	0.01078	0.15835	0.00492	0.096685	0.933017	0.017808	0.01297	5.3383	7.328	0.497845	0.3749
75	0.375	0.01103	0.158455	0.00493	0.096782	0.933081	0.017855	0.01334	5.3432	7.3365	0.497955	0.3779
76	0.38	0.01126	0.158555	0.00494	0.096874	0.933144	0.017903	0.01372	5.3482	7.346	0.49806	0.3807
77	0.385	0.01151	0.158655	0.0049505	0.096964	0.933204	0.017951	0.01409	5.3533	7.3555	0.498165	0.3839
78	0.39	0.01175	0.15876	0.0049605	0.097051	0.933266	0.017999	0.01445	5.3583	7.3645	0.49827	0.3869
79	0.395	0.01199	0.158855	0.0049705	0.097141	0.93333	0.018046	0.01481	5.3631	7.3735	0.49838	0.3899
80	0.4	0.01223	0.158955	0.0049805	0.097229	0.933392	0.018094	0.01516	5.3681	7.382	0.49848	0.393
81	0.405	0.01247	0.15906	0.004991	0.097319	0.933453	0.018141	0.01553	5.3733	7.391	0.49859	0.3961
82	0.41	0.01271	0.15916	0.005001	0.097409	0.933513	0.018189	0.01588	5.3779	7.4	0.49869	0.3991
83	0.415	0.01294	0.159265	0.005011	0.097498	0.933573	0.018233	0.01623	5.3831	7.4095	0.498795	0.4021
84	0.42	0.01317	0.159365	0.0050215	0.097587	0.933634	0.01828	0.0166	5.388	7.4185	0.4989	0.4052
85	0.425	0.0134	0.159465	0.0050315	0.097672	0.933695	0.018326	0.01696	5.3927	7.4275	0.49901	0.4083
86	0.43	0.01364	0.159565	0.005042	0.09776	0.933755	0.018372	0.01732	5.3976	7.436	0.49911	0.4115
87	0.435	0.01387	0.15966	0.005052	0.097845	0.933816	0.018417	0.01769	5.4023	7.4455	0.499215	0.4147
88	0.44	0.01411	0.15976	0.005062	0.097929	0.933873	0.018463	0.01804	5.4071	7.4545	0.49932	0.4177
89	0.445	0.01434	0.15986	0.005072	0.098014	0.933932	0.018506	0.01839	5.4117	7.4635	0.49943	0.4209
90	0.45	0.01457	0.15996	0.0050825	0.098098	0.933989	0.018552	0.01874	5.4164	7.473	0.49954	0.424
91	0.455	0.0148	0.16006	0.0050925	0.098183	0.934049	0.018598	0.01909	5.4213	7.482	0.499645	0.4273
92	0.46	0.01503	0.160165	0.0051025	0.098273	0.934109	0.018646	0.01944	5.426	7.4915	0.49975	0.4306
93	0.465	0.01525	0.160265	0.0051125	0.098359	0.934169	0.018691	0.01979	5.4309	7.5005	0.499855	0.4337
94	0.47	0.01548	0.16037	0.005123	0.098444	0.93423	0.018736	0.02013	5.4357	7.5095	0.49996	0.4368
95	0.475	0.01572	0.160475	0.0051325	0.098528	0.934289	0.018781	0.02048	5.4406	7.5185	0.50007	0.44
96	0.48	0.01594	0.160575	0.005143	0.09861	0.934348	0.018825	0.02082	5.4453	7.5275	0.50018	0.4433
97	0.485	0.01616	0.160685	0.0051535	0.098693	0.934405	0.018871	0.02118	5.45	7.536	0.500285	0.4465
98	0.49	0.01638	0.160785	0.0051635	0.09878	0.934464	0.018915	0.02155	5.4548	7.5445	0.50039	0.4499
99	0.495	0.0166	0.16089	0.005174	0.098864	0.934526	0.01896	0.02189	5.4596	7.5535	0.5005	0.4532
100	0.5	0.01682	0.16099	0.0051845	0.098952	0.934585	0.019005	0.02222	5.4642	7.563	0.500605	0.4565
101	0.505	0.01704	0.16109	0.005195	0.099043	0.934646	0.019048	0.02256	5.469	7.572	0.50071	0.4598
102	0.51	0.01728	0.161195	0.0052055	0.099131	0.93471	0.019094	0.02292	5.4736	7.5805	0.50081	0.4633
103	0.515	0.0175	0.1613	0.005216	0.09922	0.934769	0.019139	0.02326	5.4784	7.5895	0.500915	0.4667
104	0.52	0.01773	0.1614	0.0052265	0.099304	0.934829	0.019186	0.0236	5.4832	7.5985	0.501025	0.4701
105	0.525	0.01797	0.1615	0.005237	0.09939	0.934891	0.019233	0.02395	5.4878	7.608	0.50113	0.4735
106	0.53	0.0182	0.161605	0.005247	0.099476	0.934952	0.019278	0.02429	5.4928	7.6175	0.501235	0.4769
107	0.535	0.01842	0.161705	0.0052575	0.099564	0.935011	0.019324	0.02465	5.4976	7.627	0.501335	0.4806
108	0.54	0.01865	0.161805	0.0052675	0.099651	0.93507	0.019369	0.025	5.5025	7.636	0.501445	0.4842
109	0.545	0.01887	0.161905	0.005278	0.099744	0.935128	0.019414	0.02535	5.5074	7.645	0.501545	0.4876
110	0.55	0.01911	0.162005	0.0052885	0.099837	0.935189	0.019461	0.0257	5.5126	7.6535	0.501655	0.4912
111	0.555	0.01935	0.162105	0.0052995	0.09992	0.935248	0.019506	0.02605	5.5174	7.663	0.501755	0.4947
112	0.56	0.01958	0.162205	0.00531	0.100007	0.935307	0.019552	0.0264	5.5224	7.6715	0.501855	0.4984
113	0.565	0.0198	0.162305	0.0053205	0.1001	0.935366	0.019599	0.02676	5.5273	7.6805	0.501955	0.502
114	0.57	0.02003	0.16241	0.005331	0.100191	0.935429	0.019645	0.02708	5.5322	7.6895	0.502055	0.5057
115	0.575	0.02025	0.162515	0.0053415	0.10028	0.935489	0.019689	0.02743	5.5371	7.699	0.502155	0.5095
116	0.58	0.02047	0.162615	0.005352	0.100369	0.935548	0.019735	0.0278	5.542	7.708	0.50226	0.5132
117	0.585	0.0207	0.16272	0.0053625	0.100457	0.935609	0.019782	0.02816	5.547	7.718	0.50236	0.517
118	0.59	0.02094	0.16282	0.0053735	0.100546	0.935673	0.019829	0.0285	5.5522	7.727	0.502465	0.5207
119	0.595	0.02117	0.16292	0.005385	0.100638	0.935733	0.019876	0.02886	5.5571	7.7365	0.50257	0.5245
120	0.6	0.0214	0.163025	0.0053955	0.100729	0.935796	0.019925	0.02922	5.5621	7.7465	0.50268	0.5283
121	0.605	0.02163	0.163125	0.0054065	0.100823	0.935855	0.019973	0.02959	5.567	7.7555	0.50279	0.5324
122	0.61	0.02185	0.16323	0.0054175	0.100916	0.935916	0.020022	0.02996	5.5722	7.7655	0.50289	0.5366
123	0.615	0.02209	0.16333	0.005429	0.101009	0.935977	0.020071	0.03033	5.5772	7.775	0.502995	0.5406
124	0.62	0.02233	0.163435	0.00544	0.101099	0.93604	0.020122	0.03068	5.5825	7.7845	0.5031	0.5447
125	0.625	0.02257	0.16354	0.005451	0.101194	0.936102	0.020169	0.03104	5.5877	7.7935	0.50321	0.5488
126	0.63	0.0228	0.163645	0.0054625	0.101287	0.936163	0.020216	0.03141	5.5928	7.8035	0.50332	0.5528
127	0.635	0.02304	0.163745	0.0054745	0.101383	0.936226	0.020264	0.03176	5.5982	7.8135	0.50343	0.5572
128	0.64	0.02327	0.163845	0.0054865	0.101481	0.93629	0.020314	0.03215	5.6037	7.823	0.503545	0.5614
129	0.645	0.0235	0.163955	0.0054985	0.101579	0.936354	0.020362	0.03252	5.609	7.8325	0.50365	0.5657
130	0.65	0.02374	0.16406	0.0055105	0.101678	0.936416	0.020412	0.0329	5.6145	7.8425	0.50376	0.5702
131	0.655	0.02399	0.16417	0.0055215	0.101775	0.93648	0.020462	0.03328	5.6199	7.853	0.503865	0.5747
132	0.66	0.02424	0.16428	0.0055335	0.101875	0.936542	0.020514	0.03364	5.6255	7.863	0.503985	0.5791
133	0.665	0.02449	0.164385	0.0055455	0.101973	0.936604	0.020565	0.03403	5.6312	7.873	0.5041	0.5837
134	0.67	0.02474	0.164495	0.005557	0.102071	0.936668	0.020615	0.03442	5.637	7.883	0.50421	0.5882
135	0.675	0.02498	0.1646	0.005569	0.102175	0.936731	0.020665	0.03484	5.6427	7.8935	0.50433	0.5928
136	0.68	0.02522	0.16471	0.0055815	0.102276	0.936793	0.02072	0.03522	5.6485	7.9045	0.504445	0.5974
137	0.685	0.02547	0.16482	0.005594	0.102378	0.936856	0.02077	0.03561	5.6544	7.915	0.504565	0.6024
138	0.69	0.0257	0.164935	0.005607	0.102482	0.936921	0.020822	0.03602	5.6602	7.9255	0.504685	0.6073
139	0.695	0.02596	0.16504	0.005619	0.102587	0.936983	0.020876	0.03641	5.6658	7.9365	0.5048	0.6124
140	0.7	0.0262	0.165145	0.0056315	0.10269	0.937049	0.020932	0.03683	5.6719	7.947	0.504915	0.6173
141	0.705	0.02646	0.165255	0.0056435	0.102793	0.937115	0.020984	0.03722	5.6781	7.9585	0.505035	0.6224
142	0.71	0.02672	0.165375	0.005656	0.1029	0.937181	0.021037	0.03763	5.6842	7.97	0.50516	0.6278
143	0.715	0.02697	0.16548	0.005669	0.103012	0.937246	0.021092	0.03805	5.6902	7.9815	0.50528	0.633
144	0.72	0.02722	0.165605	0.005681	0.103121	0.937312	0.02115	0.03849	5.6963	7.993	0.50541	0.6385
145	0.725	0.02748	0.165725	0.0056935	0.103228	0.937383	0.021204	0.0389	5.7025	8.0045	0.505535	0.6438
146	0.73	0.02775	0.16584	0.005706	0.103341	0.937452	0.02126	0.03934	5.7087	8.0165	0.50566	0.6494
147	0.735	0.02801	0.165965	0.0057185	0.103456	0.937521	0.021317	0.03979	5.7149	8.0285	0.505785	0.6549
148	0.74	0.02829	0.166085	0.0057305	0.103571	0.937589	0.021373	0.04027	5.7212	8.0405	0.505915	0.6607
149	0.745	0.02856	0.16621	0.0057435	0.103686	0.937658	0.021432	0.0407	5.7275	8.053	0.50605	0.6665
150	0.75	0.02885	0.16633	0.005757	0.1038	0.937725	0.021491	0.04115	5.7341	8.065	0.50618	0.6725
151	0.755	0.02913	0.16645	0.0057705	0.103926	0.937796	0.021549	0.0416	5.7406	8.078	0.50631	0.6783
152	0.76	0.0294	0.16658	0.0057835	0.104044	0.937866	0.021609	0.04206	5.7471	8.091	0.50644	0.6846
153	0.765	0.02969	0.16671	0.0057975	0.104165	0.937937	0.021671	0.04252	5.7538	8.1045	0.50658	0.6907
154	0.77	0.02999	0.16684	0.0058125	0.104288	0.938008	0.021729	0.04298	5.7606	8.118	0.506715	0.6972
155	0.775	0.03027	0.16697	0.0058265	0.10442	0.938084	0.021788	0.04347	5.7676	8.132	0.506855	0.7038
156	0.78	0.03055	0.1671	0.005841	0.104547	0.938158	0.021847	0.04397	5.7747	8.1465	0.506995	0.7105
157	0.785	0.03086	0.16724	0.005856	0.104675	0.938235	0.021909	0.04445	5.7818	8.1605	0.50714	0.7176
158	0.79	0.03116	0.16738	0.005871	0.104809	0.938312	0.021973	0.04496	5.789	8.175	0.507285	0.7245
159	0.795	0.03149	0.16752	0.005886	0.104953	0.938388	0.022039	0.04546	5.7965	8.1905	0.507425	0.7313
160	0.8	0.03179	0.16766	0.005902	0.105082	0.93847	0.022105	0.04596	5.8037	8.2055	0.507575	0.7385
161	0.805	0.03211	0.167805	0.0059185	0.105218	0.938554	0.022175	0.04647	5.8117	8.22	0.507725	0.746
162	0.81	0.03244	0.167945	0.005935	0.105355	0.938637	0.022245	0.04698	5.8192	8.235	0.50788	0.7536
163	0.815	0.03277	0.168095	0.0059515	0.105494	0.938718	0.022315	0.04754	5.827	8.2505	0.508035	0.7617
164	0.82	0.0331	0.16824	0.005969	0.105651	0.938804	0.022387	0.04806	5.8351	8.2655	0.508195	0.7701
165	0.825	0.03343	0.168395	0.0059855	0.105794	0.938889	0.02246	0.04864	5.8435	8.2825	0.508375	0.7782
166	0.83	0.03377	0.168545	0.0060035	0.105944	0.938976	0.02253	0.04921	5.8516	8.299	0.508535	0.7864
167	0.835	0.03413	0.1687	0.006021	0.106096	0.939065	0.022607	0.04979	5.8596	8.3155	0.508705	0.795
168	0.84	0.03448	0.168865	0.0060395	0.106254	0.939152	0.022685	0.05039	5.8685	8.333	0.508885	0.8037
169	0.845	0.03482	0.16904	0.0060585	0.106411	0.939239	0.022763	0.05101	5.8773	8.351	0.50907	0.813
170	0.85	0.03518	0.16921	0.006077	0.106573	0.939335	0.022844	0.05165	5.8865	8.369	0.50925	0.8225
171	0.855	0.03557	0.169385	0.0060965	0.106734	0.939433	0.022929	0.05227	5.8954	8.387	0.509445	0.8323
172	0.86	0.03596	0.169565	0.006116	0.106897	0.939531	0.023018	0.05292	5.9052	8.407	0.509635	0.8423
173	0.865	0.03635	0.16974	0.0061365	0.107056	0.939633	0.023104	0.05355	5.9149	8.4255	0.509835	0.853
174	0.87	0.03675	0.16992	0.006158	0.107231	0.939737	0.023193	0.05423	5.925	8.446	0.51003	0.8636
175	0.875	0.03717	0.17011	0.00618	0.107405	0.939843	0.023289	0.05492	5.9359	8.466	0.51023	0.8751
176	0.88	0.03758	0.1703	0.0062025	0.107584	0.939957	0.023386	0.05565	5.9473	8.487	0.510425	0.8882
177	0.885	0.03802	0.170495	0.0062265	0.107771	0.940066	0.023488	0.0564	5.9584	8.508	0.510645	0.9002
178	0.89	0.03847	0.170705	0.006251	0.10797	0.940187	0.023587	0.05714	5.9702	8.53	0.51087	0.9133
179	0.895	0.03898	0.17092	0.0062765	0.108168	0.940303	0.023691	0.05794	5.9826	8.551	0.511115	0.9268
180	0.9	0.03948	0.17113	0.006303	0.10837	0.94043	0.023799	0.05873	5.9953	8.5745	0.51134	0.9404
181	0.905	0.03999	0.17135	0.00633	0.108589	0.940556	0.023913	0.05958	6.0086	8.5985	0.511575	0.9551
182	0.91	0.04053	0.17158	0.006358	0.108805	0.94069	0.024028	0.06044	6.0223	8.6245	0.51182	0.9701
183	0.915	0.04104	0.17183	0.0063875	0.109055	0.940829	0.024151	0.06133	6.0364	8.6525	0.512075	0.9861
184	0.92	0.04158	0.17209	0.0064195	0.109302	0.940972	0.024281	0.06227	6.0518	8.6805	0.512355	1.0042
185	0.925	0.0422	0.172355	0.006452	0.109565	0.941123	0.024419	0.06327	6.0674	8.7115	0.51265	1.0221
186	0.93	0.0428	0.172635	0.006486	0.10984	0.941279	0.024556	0.06433	6.0835	8.744	0.51296	1.0415
187	0.935	0.04341	0.172935	0.0065235	0.110129	0.941447	0.02472	0.0655	6.0996	8.7765	0.51327	1.0635
188	0.94	0.04411	0.173245	0.0065605	0.110436	0.941617	0.02488	0.06675	6.1187	8.8125	0.513605	1.0867
189	0.945	0.04482	0.173595	0.0066025	0.110773	0.941801	0.025055	0.06802	6.1387	8.8515	0.51395	1.1122
190	0.95	0.04557	0.173975	0.0066445	0.111115	0.941994	0.025237	0.06941	6.1592	8.893	0.514345	1.1402
191	0.955	0.0464	0.1744	0.00669	0.11153	0.942204	0.02544	0.07087	6.1825	8.941	0.51475	1.1698
192	0.96	0.04729	0.174865	0.006741	0.111987	0.942434	0.025669	0.07253	6.2068	8.9955	0.5152	1.2036
193	0.965	0.04836	0.175365	0.006798	0.112472	0.942688	0.025931	0.07436	6.2349	9.055	0.51571	1.243
194	0.97	0.04958	0.17593	0.0068595	0.113036	0.942961	0.026208	0.07643	6.2664	9.121	0.516255	1.2869
195	0.975	0.05098	0.17664	0.006937	0.113689	0.943277	0.026528	0.07883	6.3043	9.2035	0.5169	1.3417
196	0.98	0.05267	0.17743	0.0070285	0.114482	0.943667	0.026907	0.08161	6.3478	9.2965	0.517665	1.4105
197	0.985	0.05477	0.178325	0.0071445	0.115475	0.944154	0.027386	0.08503	6.4054	9.415	0.51868	1.497
198	0.99	0.05767	0.179435	0.007293	0.116828	0.944768	0.028011	0.08973	6.4859	9.5845	0.52	1.6261
199	0.995	0.06213	0.181165	0.0075445	0.1188	0.945737	0.029069	0.09742	6.6139	9.8695	0.52193	1.8432
200	1	0	0	0	0	0	0	0	0	0	0	0
201	1.005	0	0	0	0	0	0	0	0	0	0	0
