# Supplementary material for: Time-varying asymmetry and tail thickness in long series of daily financial returns
Source: publisher site journal article supplement (doi:10.1515/snde-2017-0071), 2018-10-02
Supplement: Supplementary file 235 [file point_est.xlsx]

## Sheet: 1
	log post kernel	delta	rho	alpha0	alpha1-	beta1	alpha1+	lambda1	ni1	ni2	a00	h0	Var13	Var14	Var15	Var16	Var17	Var18	Var19	Var20	Var21	Var22	Var23	(a1+a2)/2+b1	a0/[1-(a1+a2)/2-b1]
1	-16583.5	0.0157085	0.323752	-5.25772	-2.20956	2.65683	-3.92916	0.0239252	1.24303	1.71396	0.0022889	-0.728433	0.0157085	0.160477	0.00520716	0.0988956	0.934431	0.0192812	0.0239252	5.4671	7.5519	0.500729	0.482665	0.993519	0.803477
2	-16583.8	0.0170062	0.323593	-5.30375	-2.2309	2.68627	-3.98444	0.0218981	1.2357	1.71229	0.00162982	-1.10924	0.0170062	0.1604	0.00497289	0.0970102	0.936212	0.0182631	0.0218981	5.44179	7.54263	0.500519	0.329809	0.993848	0.808396
3	-16583.6	0.0166094	0.32467	-5.26593	-2.20898	2.66003	-3.95642	0.0224594	1.24194	1.71643	0.00190273	-0.806349	0.0166094	0.160924	0.0051646	0.0989468	0.934626	0.0187724	0.0224594	5.46331	7.56563	0.500606	0.446485	0.993486	0.792838
