# Supplementary material for: Time-varying asymmetry and tail thickness in long series of daily financial returns
Source: publisher site journal article supplement (doi:10.1515/snde-2017-0071), 2018-10-02
Supplement: Supplementary file 237 [file post_es.xlsx]

## Sheet: 1
	delta	rho	alpha0	alpha1-	beta1	alpha1+	lambda1	ni1	ni2	a00	h0	(a1+a2)/2+b1	a0/[1-(a1+a2)/2-b1]	[a0/(1-(a1+a2)/2-b1)]^0.5	alpha1/alpha2	ni2/ni1
1	0.0166094	0.160913	0.00522836	0.0991727	0.934469	0.0191126	0.0224594	5.48494	7.61288	0.500605	0.528506	0.993612	0.904739	0.935711	5.3689	1.39695
2	0.0179666	0.00802372	0.000816663	0.00709976	0.00470849	0.0036066	0.02822	0.389883	0.734959	0.00830985	0.318866	0.00200238	0.764691	0.170741	1.06404	0.183873
