# Supplementary material for: Time-varying asymmetry and tail thickness in long series of daily financial returns
Source: publisher site journal article supplement (doi:10.1515/snde-2017-0071), 2018-10-02
Supplement: Supplementary file 245 [file probs.xlsx]

## Sheet: 1
	(a1+a2)/2+b1 > 1	alpha1 <= alpha2	lambda1 <= 0	ni1 >= ni2	a00 < 0.5	Var6	Var7	Var8	Var9	Var10
1	0.000217477	0	0.213878	0.00522344	0.471694	109	0	107196	2618	236414
