# Supplementary material for: Time-varying asymmetry and tail thickness in long series of daily financial returns
Source: publisher site journal article supplement (doi:10.1515/snde-2017-0071), 2018-10-02
Supplement: Supplementary file 265 [file acc_summary.xlsx]

## Sheet: 1
	Var1	Var2	Var3	Var4	Var5
1	0.081221	0.104326	0.116867	0.106297	0.36748
2	0.0723061	0.0925984	0.0979474	0.0963193	0.36748
3	0.0780926	0.0842488	0.0746517	0.0842461	0.36748
4	0.0638315	0.0142775	0.00598496	0.00858878	0.36748
5	0.177241	0.185172	0.225936	0.200129	0.36748
6	0.156199	0.165603	0.184825	0.180718	0.36748
7	0.182139	0.173762	0.181117	0.181783	0.36748
8	0.188969	0.180011	0.112671	0.141919	0.36748
