# Supplementary material for: Time-varying asymmetry and tail thickness in long series of daily financial returns
Source: publisher site journal article supplement (doi:10.1515/snde-2017-0071), 2018-10-02
Supplement: Supplementary file 267 [file add_par_res.xlsx]

## Sheet: 1
	(a1+a2)/2+b1	a0/[1-(a1+a2)/2-b1]	[a0/(1-(a1+a2)/2-b1)]^0.5	alpha1/alpha2	ni2/ni1	per_1	per_2	per_3	per_4
1	0.987917	0.812432	0.898848	10.2639	1.64608	39.4096	13.1758	37.6669	19.8299
2	0.00238978	0.125882	0.0671155	4.96391	0.272447	1.57211	1.94521	2.50575	4.8723
