# Supplementary material for: Time-varying asymmetry and tail thickness in long series of daily financial returns
Source: publisher site journal article supplement (doi:10.1515/snde-2017-0071), 2018-10-02
Supplement: Supplementary file 269 [file cvm1.xlsx]

## Sheet: 1
	Var1	Var2	Var3	Var4	Var5	Var6	Var7	Var8	Var9	Var10	Var11	Var12	Var13	Var14	Var15	Var16	Var17	Var18	Var19	Var20	Var21	Var22	Var23
1	0.000294933	-3.66266e-05	-0.000654551	-1.86539e-05	0.000184082	0.00026295	-0.000422881	1.94755e-05	-0.000117708	6.703e-06	-0.000375561	-0.000367803	-0.000201385	0.000286658	0.000488281	0.000265741	0.000241859	-0.000199851	-0.00014947	-0.0020753	0.000392799	-0.00124558	-0.000953999
2	-3.66266e-05	0.000266403	9.15406e-05	0.000119452	-5.49161e-05	-0.000442188	4.60212e-05	-3.42992e-05	-1.64421e-05	-2.52256e-05	-0.000198281	5.21236e-05	-1.89211e-05	-0.000126066	-5.7553e-05	-2.82619e-05	-4.45629e-06	0.000204384	-0.000113454	0.000912106	-3.06626e-05	0.000854394	-1.72697e-05
3	-0.000654551	9.15406e-05	0.0187579	0.00591004	-0.00838365	0.00571146	0.000916523	-0.00246255	-0.000188967	-0.00017717	0.0100917	-0.00160736	-0.000883543	-0.00112349	-0.00231866	-0.00228503	-0.00431205	0.000544317	0.00315241	0.00699906	-0.00797292	0.0129207	0.00634407
4	-1.86539e-05	0.000119452	0.00591004	0.00630438	-0.00521351	0.0052965	-6.37561e-05	-0.0017453	-4.28329e-05	-0.000113587	0.00310801	-0.000115943	5.05772e-05	2.46934e-05	-0.00131662	0.000427545	-9.02475e-05	-0.000144398	0.000729682	0.00104793	-0.000646923	0.00322835	0.00390426
5	0.000184082	-5.49161e-05	-0.00838365	-0.00521351	0.00650171	-0.0148712	-0.000325156	-0.000198769	1.97522e-05	2.16424e-05	-0.0051466	0.000126737	-0.000307705	0.000212632	0.000756722	0.00102114	0.000359916	-0.000498839	-0.000306939	-0.00409571	0.00117759	-0.00362743	-0.0034107
6	0.00026295	-0.000442188	0.00571146	0.0052965	-0.0148712	0.141066	-0.000130471	0.00355946	-0.00051034	0.000261815	0.00641708	0.000278005	0.000813847	0.00339302	0.00699546	-0.000746408	0.00598116	-0.00386968	-0.0012566	-0.0119418	0.00572954	-0.0236459	-0.00660582
7	-0.000422881	4.60212e-05	0.000916523	-6.37561e-05	-0.000325156	-0.000130471	0.000694389	0.000240845	-2.0341e-05	-1.95749e-05	0.000655021	0.000486939	0.000343156	-0.000308215	-0.000658865	-0.00046871	-0.000296074	0.000283992	0.000135117	0.00333604	-0.000471142	0.00153669	0.00138687
8	1.94755e-05	-3.42992e-05	-0.00246255	-0.0017453	-0.000198769	0.00355946	0.000240845	0.0191429	-0.00457371	0.00223395	0.000496417	0.000338567	0.001673	-0.00372334	0.00436816	-0.00351913	0.00332022	-6.3928e-05	-0.00487632	0.00300636	0.0047553	-0.0079006	-0.00292939
9	-0.000117708	-1.64421e-05	-0.000188967	-4.28329e-05	1.97522e-05	-0.00051034	-2.0341e-05	-0.00457371	0.0247391	-0.00248673	-0.00277827	0.00127484	-0.0012114	-0.00518919	-0.00279047	0.000818617	-0.00205546	-0.00277243	0.00429833	0.00360744	-0.00330792	7.27506e-05	0.00731543
10	6.703e-06	-2.52256e-05	-0.00017717	-0.000113587	2.16424e-05	0.000261815	-1.95749e-05	0.00223395	-0.00248673	0.00070537	0.000293309	6.36303e-05	0.00020444	-0.000224216	0.000328759	-0.000251516	0.000370381	0.000426489	-0.000830606	0.000341227	0.000472159	0.000529716	-0.000308489
11	-0.000375561	-0.000198281	0.0100917	0.00310801	-0.0051466	0.00641708	0.000655021	0.000496417	-0.00277827	0.000293309	0.520872	-0.00287162	0.00151555	0.0023151	-0.00562893	-0.00966237	-0.0376874	0.00251631	0.00682909	-0.0314748	-0.0420832	0.0180654	0.00086229
12	-0.000367803	5.21236e-05	-0.00160736	-0.000115943	0.000126737	0.000278005	0.000486939	0.000338567	0.00127484	6.36303e-05	-0.00287162	0.0127124	0.00262139	-0.0127042	-0.0126953	0.00112115	-0.000851306	0.0105602	-0.00277301	0.0697034	-0.000128626	0.0364035	0.0233211
13	-0.000201385	-1.89211e-05	-0.000883543	5.05772e-05	-0.000307705	0.000813847	0.000343156	0.001673	-0.0012114	0.00020444	0.00151555	0.00262139	0.0159204	-0.00447003	-0.0080008	-0.000528859	0.00304365	0.00586863	-0.0110332	0.0369788	0.0156502	0.0230831	0.0202994
14	0.000286658	-0.000126066	-0.00112349	2.46934e-05	0.000212632	0.00339302	-0.000308215	-0.00372334	-0.00518919	-0.000224216	0.0023151	-0.0127042	-0.00447003	0.0598562	0.0122465	0.000864046	0.00214544	-0.0412263	0.0367961	-0.0987525	0.00215269	-0.176042	-0.0337965
15	0.000488281	-5.7553e-05	-0.00231866	-0.00131662	0.000756722	0.00699546	-0.000658865	0.00436816	-0.00279047	0.000328759	-0.00562893	-0.0126953	-0.0080008	0.0122465	0.0709389	-0.00324665	0.0146801	-0.0273283	-0.0126595	-0.104434	0.0151589	-0.0877353	-0.0986681
16	0.000265741	-2.82619e-05	-0.00228503	0.000427545	0.00102114	-0.000746408	-0.00046871	-0.00351913	0.000818617	-0.000251516	-0.00966237	0.00112115	-0.000528859	0.000864046	-0.00324665	0.00889434	0.00102985	-0.00619519	0.00158159	0.0124116	-0.000330101	-0.00323254	0.00918719
17	0.000241859	-4.45629e-06	-0.00431205	-9.02475e-05	0.000359916	0.00598116	-0.000296074	0.00332022	-0.00205546	0.000370381	-0.0376874	-0.000851306	0.00304365	0.00214544	0.0146801	0.00102985	0.0325804	-0.00528871	-0.0138846	0.000757807	0.0429104	-0.0315061	-0.0165383
18	-0.000199851	0.000204384	0.000544317	-0.000144398	-0.000498839	-0.00386968	0.000283992	-6.3928e-05	-0.00277243	0.000426489	0.00251631	0.0105602	0.00586863	-0.0412263	-0.0273283	-0.00619519	-0.00528871	0.0597816	-0.0342324	0.113329	-0.00398215	0.168562	0.0314896
19	-0.00014947	-0.000113454	0.00315241	0.000729682	-0.000306939	-0.0012566	0.000135117	-0.00487632	0.00429833	-0.000830606	0.00682909	-0.00277301	-0.0110332	0.0367961	-0.0126595	0.00158159	-0.0138846	-0.0342324	0.0779994	-0.0667174	-0.0228778	-0.118969	0.0189562
20	-0.0020753	0.000912106	0.00699906	0.00104793	-0.00409571	-0.0119418	0.00333604	0.00300636	0.00360744	0.000341227	-0.0314748	0.0697034	0.0369788	-0.0987525	-0.104434	0.0124116	0.000757807	0.113329	-0.0667174	1.3521	0.013462	0.508636	0.237846
21	0.000392799	-3.06626e-05	-0.00797292	-0.000646923	0.00117759	0.00572954	-0.000471142	0.0047553	-0.00330792	0.000472159	-0.0420832	-0.000128626	0.0156502	0.00215269	0.0151589	-0.000330101	0.0429104	-0.00398215	-0.0228778	0.013462	0.0877057	-0.0376115	-0.0186184
22	-0.00124558	0.000854394	0.0129207	0.00322835	-0.00362743	-0.0236459	0.00153669	-0.0079006	7.27506e-05	0.000529716	0.0180654	0.0364035	0.0230831	-0.176042	-0.0877353	-0.00323254	-0.0315061	0.168562	-0.118969	0.508636	-0.0376115	0.898712	0.202562
23	-0.000953999	-1.72697e-05	0.00634407	0.00390426	-0.0034107	-0.00660582	0.00138687	-0.00292939	0.00731543	-0.000308489	0.00086229	0.0233211	0.0202994	-0.0337965	-0.0986681	0.00918719	-0.0165383	0.0314896	0.0189562	0.237846	-0.0186184	0.202562	0.339453
