# Supplementary material for: Time-varying asymmetry and tail thickness in long series of daily financial returns
Source: publisher site journal article supplement (doi:10.1515/snde-2017-0071), 2018-10-02
Supplement: Supplementary file 273 [file cvm_ip.xlsx]

## Sheet: 1
	delta	rho	alpha0	alpha1-	beta1	alpha1+	lambda1	ni1	ni2	a00	h0	gamma_s0	gamma_s1	gamma_s2	gamma_s3	gamma_c0	gamma_c1	gamma_c2	gamma_c3	phi0	phi1	phi2	phi3
1	0.000294933	-1.78522e-05	-6.22521e-06	-1.77372e-06	1.20258e-05	2.98998e-06	-0.000422881	6.64553e-05	-0.000837568	2.13104e-06	-0.000102631	-0.000367803	-0.000201385	0.000286658	0.000488281	0.000265741	0.000241859	-0.000199851	-0.00014947	-5.17637e-08	6.5359e-07	-6.1291e-08	-1.1965e-06
2	-1.78522e-05	6.32694e-05	4.46724e-07	5.47004e-06	-1.75546e-06	-2.20253e-06	2.24296e-05	-6.34756e-05	-7.83026e-05	-3.91212e-06	-4.60288e-05	2.54488e-05	-9.19352e-06	-6.15098e-05	-2.81802e-05	-1.37715e-05	-2.15002e-06	9.97189e-05	-5.53438e-05	8.04304e-09	-9.63857e-09	1.6077e-08	7.22348e-09
3	-6.22521e-06	4.46724e-07	1.70174e-06	5.30088e-06	-5.21496e-06	6.16696e-07	8.68819e-06	-8.16986e-05	-1.30036e-05	-5.48116e-07	3.85343e-05	-1.4885e-05	-7.60519e-06	-1.04357e-05	-2.18735e-05	-2.09652e-05	-3.95556e-05	4.58264e-06	2.95798e-05	1.36542e-09	-1.34326e-07	5.03167e-09	8.82713e-08
4	-1.77372e-06	5.47004e-06	5.30088e-06	5.49844e-05	-3.16468e-05	5.32107e-06	-5.92719e-06	-0.000550768	-4.56983e-05	-3.43415e-06	0.000133223	-1.05307e-05	5.37256e-06	3.72568e-06	-0.000124613	4.12075e-05	-7.94208e-06	-1.46029e-05	6.90195e-05	1.25498e-09	-1.3296e-07	8.49495e-09	4.31459e-07
5	1.20258e-05	-1.75546e-06	-5.21496e-06	-3.16468e-05	2.74995e-05	-1.01689e-05	-2.11644e-05	-4.24338e-05	2.10497e-05	4.64579e-07	-0.000139379	7.61054e-06	-2.07388e-05	1.37322e-05	4.98394e-05	6.56178e-05	2.27969e-05	-3.30043e-05	-1.91344e-05	-4.68661e-09	1.50008e-07	-6.58336e-09	-2.66468e-07
6	2.98998e-06	-2.20253e-06	6.16696e-07	5.32107e-06	-1.01689e-05	1.44828e-05	-2.03556e-06	0.000111389	-1.0885e-05	5.89328e-07	2.32076e-05	2.75879e-06	4.33546e-06	4.1572e-05	7.23372e-05	-6.18872e-06	5.67396e-05	-4.19717e-05	-1.03452e-05	-3.63491e-09	7.41781e-08	-1.64074e-08	-1.31289e-07
7	-0.000422881	2.24296e-05	8.68819e-06	-5.92719e-06	-2.11644e-05	-2.03556e-06	0.000694389	0.000827166	-9.60546e-05	-6.22444e-06	0.00016169	0.000486939	0.000343156	-0.000308215	-0.000658865	-0.00046871	-0.000296074	0.000283992	0.000135117	7.21483e-08	-7.77645e-07	7.18658e-08	1.74728e-06
8	6.64553e-05	-6.34756e-05	-8.16986e-05	-0.000550768	-4.24338e-05	0.000111389	0.000827166	0.229205	-0.104345	0.00243686	-0.00179588	0.00129583	0.00584094	-0.0130444	0.0151499	-0.0117978	0.0117365	-0.000749893	-0.0169238	1.08244e-07	2.82317e-05	-8.84839e-07	-2.19035e-05
9	-0.000837568	-7.83026e-05	-1.30036e-05	-4.56983e-05	2.10497e-05	-1.0885e-05	-9.60546e-05	-0.104345	1.20033	-0.00542483	-0.00626766	0.0089237	-0.00847415	-0.037437	-0.0195268	0.00577491	-0.0140614	-0.018813	0.0290678	8.6024e-07	-4.1651e-05	1.603e-06	5.87648e-05
10	2.13104e-06	-3.91212e-06	-5.48116e-07	-3.43415e-06	4.64579e-07	5.89328e-07	-6.22444e-06	0.00243686	-0.00542483	7.13499e-05	1.89453e-05	2.02357e-05	6.50228e-05	-7.13279e-05	0.000104559	-7.9986e-05	0.000117816	0.000135661	-0.000264207	5.48765e-09	2.66547e-07	9.55427e-09	-2.28473e-07
11	-0.000102631	-4.60288e-05	3.85343e-05	0.000133223	-0.000139379	2.32076e-05	0.00016169	-0.00179588	-0.00626766	1.89453e-05	0.0757615	-0.00086028	0.0012138	0.000801235	-0.00210605	-0.00325834	-0.0127116	0.00113513	0.00136811	-1.75869e-07	-2.37389e-05	3.03218e-07	2.08961e-07
12	-0.000367803	2.54488e-05	-1.4885e-05	-1.05307e-05	7.61054e-06	2.75879e-06	0.000486939	0.00129583	0.0089237	2.02357e-05	-0.00086028	0.0127124	0.00262139	-0.0127042	-0.0126953	0.00112115	-0.000851306	0.0105602	-0.00277301	1.99563e-06	3.06492e-06	2.15585e-06	2.7908e-05
13	-0.000201385	-9.19352e-06	-7.60519e-06	5.37256e-06	-2.07388e-05	4.33546e-06	0.000343156	0.00584094	-0.00847415	6.50228e-05	0.0012138	0.00262139	0.0159204	-0.00447003	-0.0080008	-0.000528859	0.00304365	0.00586863	-0.0110332	8.36217e-07	3.30201e-05	1.05483e-06	2.07671e-05
14	0.000286658	-6.15098e-05	-1.04357e-05	3.72568e-06	1.37322e-05	4.1572e-05	-0.000308215	-0.0130444	-0.037437	-7.13279e-05	0.000801235	-0.0127042	-0.00447003	0.0598562	0.0122465	0.000864046	0.00214544	-0.0412263	0.0367961	-2.5345e-06	-3.15544e-07	-9.27032e-06	-4.14335e-05
15	0.000488281	-2.81802e-05	-2.18735e-05	-0.000124613	4.98394e-05	7.23372e-05	-0.000658865	0.0151499	-0.0195268	0.000104559	-0.00210605	-0.0126953	-0.0080008	0.0122465	0.0709389	-0.00324665	0.0146801	-0.0273283	-0.0126595	-3.28011e-06	2.17489e-05	-5.93632e-06	-0.000121884
16	0.000265741	-1.37715e-05	-2.09652e-05	4.12075e-05	6.56178e-05	-6.18872e-06	-0.00046871	-0.0117978	0.00577491	-7.9986e-05	-0.00325834	0.00112115	-0.000528859	0.000864046	-0.00324665	0.00889434	0.00102985	-0.00619519	0.00158159	3.86035e-07	-5.88228e-07	-1.63892e-07	1.00289e-05
17	0.000241859	-2.15002e-06	-3.95556e-05	-7.94208e-06	2.27969e-05	5.67396e-05	-0.000296074	0.0117365	-0.0140614	0.000117816	-0.0127116	-0.000851306	0.00304365	0.00214544	0.0146801	0.00102985	0.0325804	-0.00528871	-0.0138846	-4.44308e-07	7.67918e-05	-1.96835e-06	-2.40555e-05
18	-0.000199851	9.97189e-05	4.58264e-06	-1.46029e-05	-3.30043e-05	-4.19717e-05	0.000283992	-0.000749893	-0.018813	0.000135661	0.00113513	0.0105602	0.00586863	-0.0412263	-0.0273283	-0.00619519	-0.00528871	0.0597816	-0.0342324	2.96498e-06	-1.16908e-06	9.80178e-06	4.3116e-05
19	-0.00014947	-5.53438e-05	2.95798e-05	6.90195e-05	-1.91344e-05	-1.03452e-05	0.000135117	-0.0169238	0.0290678	-0.000264207	0.00136811	-0.00277301	-0.0110332	0.0367961	-0.0126595	0.00158159	-0.0138846	-0.0342324	0.0779994	-1.15792e-06	-4.41038e-05	-5.90097e-06	2.94338e-05
20	-5.17637e-08	8.04304e-09	1.36542e-09	1.25498e-09	-4.68661e-09	-3.63491e-09	7.21483e-08	1.08244e-07	8.6024e-07	5.48765e-09	-1.75869e-07	1.99563e-06	8.36217e-07	-2.5345e-06	-3.28011e-06	3.86035e-07	-4.44308e-07	2.96498e-06	-1.15792e-06	6.99627e-10	3.64867e-10	6.89837e-10	8.16905e-09
21	6.5359e-07	-9.63857e-09	-1.34326e-07	-1.3296e-07	1.50008e-07	7.41781e-08	-7.77645e-07	2.82317e-05	-4.1651e-05	2.66547e-07	-2.37389e-05	3.06492e-06	3.30201e-05	-3.15544e-07	2.17489e-05	-5.88228e-07	7.67918e-05	-1.16908e-06	-4.41038e-05	3.64867e-10	3.20081e-07	-2.99576e-09	-3.88667e-08
22	-6.1291e-08	1.6077e-08	5.03167e-09	8.49495e-09	-6.58336e-09	-1.64074e-08	7.18658e-08	-8.84839e-07	1.603e-06	9.55427e-09	3.03218e-07	2.15585e-06	1.05483e-06	-9.27032e-06	-5.93632e-06	-1.63892e-07	-1.96835e-06	9.80178e-06	-5.90097e-06	6.89837e-10	-2.99576e-09	2.16843e-09	1.35533e-08
23	-1.1965e-06	7.22348e-09	8.82713e-08	4.31459e-07	-2.66468e-07	-1.31289e-07	1.74728e-06	-2.19035e-05	5.87648e-05	-2.28473e-07	2.08961e-07	2.7908e-05	2.07671e-05	-4.14335e-05	-0.000121884	1.00289e-05	-2.40555e-05	4.3116e-05	2.94338e-05	8.16905e-09	-3.88667e-08	1.35533e-08	5.06952e-07
