# Supplementary material for: Time-varying asymmetry and tail thickness in long series of daily financial returns
Source: publisher site journal article supplement (doi:10.1515/snde-2017-0071), 2018-10-02
Supplement: Supplementary file 285 [file l_1.xlsx]

## Sheet: 1
	Var1	Var2	Var3	Var4	Var5	Var6	Var7	Var8	Var9	Var10	Var11	Var12	Var13	Var14	Var15	Var16	Var17	Var18	Var19	Var20	Var21	Var22
1	0.0556948	0.260652	0.0353826	0.0729095	0.350877	0.260652	0.125313	0.0779727	1.60401	1.00251	0.300752	0.0412797	0.0616927	0.0300752	0.0668338	0.0637959	0.0616927	0.601504	0.200501	0.551378	0.0644468	0
2	-0.047895	-0.047825	-0.047715	-0.047575	-0.04751	-0.047475	-0.04743	-0.047365	-0.047315	-0.047305	-0.04729	-0.047195	-0.047045	-0.04683	-0.04662	-0.046505	-0.046385	-0.046305	-0.04627	-0.04624	-0.04616	0
3	5	13	6	8	7	13	5	7	16	10	6	7	8	9	8	7	8	18	8	11	9	0
4	-0.04794	-0.04785	-0.0478	-0.04763	-0.04752	-0.0475	-0.04745	-0.04741	-0.04732	-0.04731	-0.0473	-0.04728	-0.04711	-0.04698	-0.04668	-0.04656	-0.04645	-0.04632	-0.04629	-0.04625	-0.04623	-0.04609
