# Supplementary material for: Time-varying asymmetry and tail thickness in long series of daily financial returns
Source: publisher site journal article supplement (doi:10.1515/snde-2017-0071), 2018-10-02
Supplement: Supplementary file 289 [file m1.xlsx]

## Sheet: 1
	Var1
1	#N/A
2	#N/A
3	#N/A
4	#N/A
5	#N/A
6	#N/A
7	#N/A
8	#N/A
9	#N/A
10	#N/A
11	#N/A
12	#N/A
13	#N/A
14	#N/A
15	#N/A
16	#N/A
17	#N/A
18	#N/A
19	#N/A
20	#N/A
21	#N/A
22	#N/A
23	#N/A
24	#N/A
25	#N/A
26	#N/A
27	#N/A
28	#N/A
29	#N/A
30	#N/A
31	#N/A
32	#N/A
33	#N/A
34	#N/A
35	#N/A
36	#N/A
37	#N/A
38	#N/A
39	#N/A
40	#N/A
41	#N/A
42	#N/A
43	#N/A
44	#N/A
45	#N/A
46	#N/A
47	#N/A
48	#N/A
49	#N/A
50	#N/A
51	#N/A
52	#N/A
53	#N/A
54	#N/A
55	#N/A
56	#N/A
57	#N/A
58	#N/A
59	#N/A
60	#N/A
61	#N/A
62	#N/A
63	#N/A
64	#N/A
65	#N/A
66	#N/A
67	#N/A
68	#N/A
69	#N/A
70	#N/A
71	#N/A
72	#N/A
73	#N/A
74	#N/A
75	#N/A
76	#N/A
77	#N/A
78	#N/A
79	#N/A
80	#N/A
81	#N/A
82	#N/A
83	#N/A
84	#N/A
85	#N/A
86	#N/A
87	#N/A
88	#N/A
89	#N/A
90	#N/A
91	#N/A
92	#N/A
93	#N/A
94	#N/A
95	#N/A
96	#N/A
97	#N/A
98	#N/A
99	#N/A
100	#N/A
101	#N/A
102	#N/A
103	#N/A
104	#N/A
105	#N/A
106	#N/A
107	#N/A
108	#N/A
109	#N/A
110	#N/A
111	#N/A
112	#N/A
113	#N/A
114	#N/A
115	#N/A
116	#N/A
117	#N/A
118	#N/A
119	#N/A
120	#N/A
121	#N/A
122	#N/A
123	#N/A
124	#N/A
125	#N/A
126	#N/A
127	#N/A
128	#N/A
129	#N/A
130	#N/A
131	#N/A
132	#N/A
133	#N/A
134	#N/A
135	#N/A
136	#N/A
137	#N/A
138	#N/A
139	#N/A
140	#N/A
141	#N/A
142	#N/A
143	#N/A
144	#N/A
145	#N/A
146	#N/A
147	#N/A
148	#N/A
149	#N/A
150	#N/A
151	#N/A
152	#N/A
153	#N/A
154	#N/A
155	#N/A
156	#N/A
157	#N/A
158	#N/A
159	#N/A
160	#N/A
161	#N/A
162	#N/A
163	#N/A
164	#N/A
165	#N/A
166	#N/A
167	#N/A
168	#N/A
169	#N/A
170	#N/A
171	#N/A
172	#N/A
173	#N/A
174	#N/A
175	#N/A
176	#N/A
177	#N/A
178	#N/A
179	#N/A
180	#N/A
181	#N/A
182	#N/A
183	#N/A
184	#N/A
185	#N/A
186	#N/A
187	#N/A
188	#N/A
189	#N/A
190	#N/A
191	#N/A
192	#N/A
193	#N/A
194	#N/A
195	#N/A
196	#N/A
197	#N/A
198	#N/A
199	#N/A
200	#N/A
201	#N/A
202	#N/A
203	#N/A
204	#N/A
205	#N/A
206	#N/A
207	#N/A
208	#N/A
209	#N/A
210	#N/A
211	#N/A
212	#N/A
213	#N/A
214	#N/A
215	#N/A
216	#N/A
217	#N/A
218	#N/A
219	#N/A
220	#N/A
221	#N/A
222	#N/A
223	#N/A
224	#N/A
225	#N/A
226	#N/A
227	#N/A
228	#N/A
229	#N/A
230	#N/A
231	#N/A
232	#N/A
233	#N/A
234	#N/A
235	#N/A
236	#N/A
237	#N/A
238	#N/A
239	#N/A
240	#N/A
241	#N/A
242	#N/A
243	#N/A
244	#N/A
245	#N/A
246	#N/A
247	#N/A
248	#N/A
249	#N/A
250	#N/A
251	#N/A
252	#N/A
253	#N/A
254	#N/A
255	#N/A
256	#N/A
257	#N/A
258	#N/A
259	#N/A
260	#N/A
261	#N/A
262	#N/A
263	#N/A
264	#N/A
265	#N/A
266	#N/A
267	#N/A
268	#N/A
269	#N/A
270	#N/A
271	#N/A
272	#N/A
273	#N/A
274	#N/A
275	#N/A
276	#N/A
277	#N/A
278	#N/A
279	#N/A
280	#N/A
281	#N/A
282	#N/A
283	#N/A
284	#N/A
285	#N/A
286	#N/A
287	#N/A
288	#N/A
289	#N/A
290	#N/A
291	#N/A
292	#N/A
293	#N/A
294	#N/A
295	#N/A
296	#N/A
297	#N/A
298	#N/A
299	#N/A
300	#N/A
301	#N/A
302	#N/A
303	#N/A
304	#N/A
305	#N/A
306	#N/A
307	#N/A
308	#N/A
309	#N/A
310	#N/A
311	#N/A
312	#N/A
313	#N/A
314	#N/A
315	#N/A
316	#N/A
317	#N/A
318	#N/A
319	#N/A
320	#N/A
321	#N/A
322	#N/A
323	#N/A
324	#N/A
325	#N/A
326	#N/A
327	#N/A
328	#N/A
329	#N/A
330	#N/A
331	#N/A
332	#N/A
333	#N/A
334	#N/A
335	#N/A
336	#N/A
337	#N/A
338	#N/A
339	#N/A
340	#N/A
341	#N/A
342	#N/A
343	#N/A
344	#N/A
345	#N/A
346	#N/A
347	#N/A
348	#N/A
349	#N/A
350	#N/A
351	#N/A
352	#N/A
353	#N/A
354	#N/A
355	#N/A
356	#N/A
357	#N/A
358	#N/A
359	#N/A
360	#N/A
361	#N/A
362	#N/A
363	#N/A
364	#N/A
365	#N/A
366	#N/A
367	#N/A
368	#N/A
369	#N/A
370	#N/A
371	#N/A
372	#N/A
373	#N/A
374	#N/A
375	#N/A
376	#N/A
377	#N/A
378	#N/A
379	#N/A
380	#N/A
381	#N/A
382	#N/A
383	#N/A
384	#N/A
385	#N/A
386	#N/A
387	#N/A
388	#N/A
389	#N/A
390	#N/A
391	#N/A
392	#N/A
393	#N/A
394	#N/A
395	#N/A
396	#N/A
397	#N/A
398	#N/A
399	#N/A
400	#N/A
401	#N/A
402	#N/A
403	#N/A
404	#N/A
405	#N/A
406	#N/A
407	#N/A
408	#N/A
409	#N/A
410	#N/A
411	#N/A
412	#N/A
413	#N/A
414	#N/A
415	#N/A
416	#N/A
417	#N/A
418	#N/A
419	#N/A
420	#N/A
421	#N/A
422	#N/A
423	#N/A
424	#N/A
425	#N/A
426	#N/A
427	#N/A
428	#N/A
429	#N/A
430	#N/A
431	#N/A
432	#N/A
433	#N/A
434	#N/A
435	#N/A
436	#N/A
437	#N/A
438	#N/A
439	#N/A
440	#N/A
441	#N/A
442	#N/A
443	#N/A
444	#N/A
445	#N/A
446	#N/A
447	#N/A
448	#N/A
449	#N/A
450	#N/A
451	#N/A
452	#N/A
453	#N/A
454	#N/A
455	#N/A
456	#N/A
457	#N/A
458	#N/A
459	#N/A
460	#N/A
461	#N/A
462	#N/A
463	#N/A
464	#N/A
465	#N/A
466	#N/A
467	#N/A
468	#N/A
469	#N/A
470	#N/A
471	#N/A
472	#N/A
473	#N/A
474	#N/A
475	#N/A
476	#N/A
477	#N/A
478	#N/A
479	#N/A
480	#N/A
481	#N/A
482	#N/A
483	#N/A
484	#N/A
485	#N/A
486	#N/A
487	#N/A
488	#N/A
489	#N/A
490	#N/A
491	#N/A
492	#N/A
493	#N/A
494	#N/A
495	#N/A
496	#N/A
497	#N/A
498	#N/A
499	#N/A
500	#N/A
501	#N/A
502	#N/A
503	#N/A
504	#N/A
505	#N/A
506	#N/A
507	#N/A
508	#N/A
509	#N/A
510	#N/A
511	#N/A
512	#N/A
513	#N/A
514	#N/A
515	#N/A
516	#N/A
517	#N/A
518	#N/A
519	#N/A
520	#N/A
521	#N/A
522	#N/A
523	#N/A
524	#N/A
525	#N/A
526	#N/A
527	#N/A
528	#N/A
529	#N/A
530	#N/A
531	#N/A
532	#N/A
533	#N/A
534	#N/A
535	#N/A
536	#N/A
537	#N/A
538	#N/A
539	#N/A
540	#N/A
541	#N/A
542	#N/A
543	#N/A
544	#N/A
545	#N/A
546	#N/A
547	#N/A
548	#N/A
549	#N/A
550	#N/A
551	#N/A
552	#N/A
553	#N/A
554	#N/A
555	#N/A
556	#N/A
557	#N/A
558	#N/A
559	#N/A
560	#N/A
561	#N/A
562	#N/A
563	#N/A
564	#N/A
565	#N/A
566	#N/A
567	#N/A
568	#N/A
569	#N/A
570	#N/A
571	#N/A
572	#N/A
573	#N/A
574	#N/A
575	#N/A
576	#N/A
577	#N/A
578	#N/A
579	#N/A
580	#N/A
581	#N/A
582	#N/A
583	#N/A
584	#N/A
585	#N/A
586	#N/A
587	#N/A
588	#N/A
589	#N/A
590	#N/A
591	#N/A
592	#N/A
593	#N/A
594	#N/A
595	#N/A
596	#N/A
597	#N/A
598	#N/A
599	#N/A
600	#N/A
601	#N/A
602	#N/A
603	#N/A
604	#N/A
605	#N/A
606	#N/A
607	#N/A
608	#N/A
609	#N/A
610	#N/A
611	#N/A
612	#N/A
613	#N/A
614	#N/A
615	#N/A
616	#N/A
617	#N/A
618	#N/A
619	#N/A
620	#N/A
621	#N/A
622	#N/A
623	#N/A
624	#N/A
625	#N/A
626	#N/A
627	#N/A
628	#N/A
629	#N/A
630	#N/A
631	#N/A
632	#N/A
633	#N/A
634	#N/A
635	#N/A
636	#N/A
637	#N/A
638	#N/A
639	#N/A
640	#N/A
641	#N/A
642	#N/A
643	#N/A
644	#N/A
645	#N/A
646	#N/A
647	#N/A
648	#N/A
649	#N/A
650	#N/A
651	#N/A
652	#N/A
653	#N/A
654	#N/A
655	#N/A
656	#N/A
657	#N/A
658	#N/A
659	#N/A
660	#N/A
661	#N/A
662	#N/A
663	#N/A
664	#N/A
665	#N/A
666	#N/A
667	#N/A
668	#N/A
669	#N/A
670	#N/A
671	#N/A
672	#N/A
673	#N/A
674	#N/A
675	#N/A
676	#N/A
677	#N/A
678	#N/A
679	#N/A
680	#N/A
681	#N/A
682	#N/A
683	#N/A
684	#N/A
685	#N/A
686	#N/A
687	#N/A
688	#N/A
689	#N/A
690	#N/A
691	#N/A
692	#N/A
693	#N/A
694	#N/A
695	#N/A
696	#N/A
697	#N/A
698	#N/A
699	#N/A
700	#N/A
701	#N/A
702	#N/A
703	#N/A
704	#N/A
705	#N/A
706	#N/A
707	#N/A
708	#N/A
709	#N/A
710	#N/A
711	#N/A
712	#N/A
713	#N/A
714	#N/A
715	#N/A
716	#N/A
717	#N/A
718	#N/A
719	#N/A
720	#N/A
721	#N/A
722	#N/A
723	#N/A
724	#N/A
725	#N/A
726	#N/A
727	#N/A
728	#N/A
729	#N/A
730	#N/A
731	#N/A
732	#N/A
733	#N/A
734	#N/A
735	#N/A
736	#N/A
737	#N/A
738	#N/A
739	#N/A
740	#N/A
741	#N/A
742	#N/A
743	#N/A
744	#N/A
745	#N/A
746	#N/A
747	#N/A
748	#N/A
749	#N/A
750	#N/A
751	#N/A
752	#N/A
753	#N/A
754	#N/A
755	#N/A
756	#N/A
757	#N/A
758	#N/A
759	#N/A
760	#N/A
761	#N/A
762	#N/A
763	#N/A
764	#N/A
765	#N/A
766	#N/A
767	#N/A
768	#N/A
769	#N/A
770	#N/A
771	#N/A
772	#N/A
773	#N/A
774	#N/A
775	#N/A
776	#N/A
777	#N/A
778	#N/A
779	#N/A
780	#N/A
781	#N/A
782	#N/A
783	#N/A
784	#N/A
785	#N/A
786	#N/A
787	#N/A
788	#N/A
789	#N/A
790	#N/A
791	#N/A
792	#N/A
793	#N/A
794	#N/A
795	#N/A
796	#N/A
797	#N/A
798	#N/A
799	#N/A
800	#N/A
801	#N/A
802	#N/A
803	#N/A
804	#N/A
805	#N/A
806	#N/A
807	#N/A
808	#N/A
809	#N/A
810	#N/A
811	#N/A
812	#N/A
813	#N/A
814	#N/A
815	#N/A
816	#N/A
817	#N/A
818	#N/A
819	#N/A
820	#N/A
821	#N/A
822	#N/A
823	#N/A
824	#N/A
825	#N/A
826	#N/A
827	#N/A
828	#N/A
829	#N/A
830	#N/A
831	#N/A
832	#N/A
833	#N/A
834	#N/A
835	#N/A
836	#N/A
837	#N/A
838	#N/A
839	#N/A
840	#N/A
841	#N/A
842	#N/A
843	#N/A
844	#N/A
845	#N/A
846	#N/A
847	#N/A
848	#N/A
849	#N/A
850	#N/A
851	#N/A
852	#N/A
853	#N/A
854	#N/A
855	#N/A
856	#N/A
857	#N/A
858	#N/A
859	#N/A
860	#N/A
861	#N/A
862	#N/A
863	#N/A
864	#N/A
865	#N/A
866	#N/A
867	#N/A
868	#N/A
869	#N/A
870	#N/A
871	#N/A
872	#N/A
873	#N/A
874	#N/A
875	#N/A
876	#N/A
877	#N/A
878	#N/A
879	#N/A
880	#N/A
881	#N/A
882	#N/A
883	#N/A
884	#N/A
885	#N/A
886	#N/A
887	#N/A
888	#N/A
889	#N/A
890	#N/A
891	#N/A
892	#N/A
893	#N/A
894	#N/A
895	#N/A
896	#N/A
897	#N/A
898	#N/A
899	#N/A
900	#N/A
901	#N/A
902	#N/A
903	#N/A
904	#N/A
905	#N/A
906	#N/A
907	#N/A
908	#N/A
909	#N/A
910	#N/A
911	#N/A
912	#N/A
913	#N/A
914	#N/A
915	#N/A
916	#N/A
917	#N/A
918	#N/A
919	#N/A
920	#N/A
921	#N/A
922	#N/A
923	#N/A
924	#N/A
925	#N/A
926	#N/A
927	#N/A
928	#N/A
929	#N/A
930	#N/A
931	#N/A
932	#N/A
933	#N/A
934	#N/A
935	#N/A
936	#N/A
937	#N/A
938	#N/A
939	#N/A
940	#N/A
941	#N/A
942	#N/A
943	#N/A
944	#N/A
945	#N/A
946	#N/A
947	#N/A
948	#N/A
949	#N/A
950	#N/A
951	#N/A
952	#N/A
953	#N/A
954	#N/A
955	#N/A
956	#N/A
957	#N/A
958	#N/A
959	#N/A
960	#N/A
961	#N/A
962	#N/A
963	#N/A
964	#N/A
965	#N/A
966	#N/A
967	#N/A
968	#N/A
969	#N/A
970	#N/A
971	#N/A
972	#N/A
973	#N/A
974	#N/A
975	#N/A
976	#N/A
977	#N/A
978	#N/A
979	#N/A
980	#N/A
981	#N/A
982	#N/A
983	#N/A
984	#N/A
985	#N/A
986	#N/A
987	#N/A
988	#N/A
989	#N/A
990	#N/A
991	#N/A
992	#N/A
993	#N/A
994	#N/A
995	#N/A
996	#N/A
997	#N/A
998	#N/A
999	#N/A
1000	#N/A
1001	#N/A
1002	#N/A
1003	#N/A
1004	#N/A
1005	#N/A
1006	#N/A
1007	#N/A
1008	#N/A
1009	#N/A
1010	#N/A
1011	#N/A
1012	#N/A
1013	#N/A
1014	#N/A
1015	#N/A
1016	#N/A
1017	#N/A
1018	#N/A
1019	#N/A
1020	#N/A
1021	#N/A
1022	#N/A
1023	#N/A
1024	#N/A
1025	#N/A
1026	#N/A
1027	#N/A
1028	#N/A
1029	#N/A
1030	#N/A
1031	#N/A
1032	#N/A
1033	#N/A
1034	#N/A
1035	#N/A
1036	#N/A
1037	#N/A
1038	#N/A
1039	#N/A
1040	#N/A
1041	#N/A
1042	#N/A
1043	#N/A
1044	#N/A
1045	#N/A
1046	#N/A
1047	#N/A
1048	#N/A
1049	#N/A
1050	#N/A
1051	#N/A
1052	#N/A
1053	#N/A
1054	#N/A
1055	#N/A
1056	#N/A
1057	#N/A
1058	#N/A
1059	#N/A
1060	#N/A
1061	#N/A
1062	#N/A
1063	#N/A
1064	#N/A
1065	#N/A
1066	#N/A
1067	#N/A
1068	#N/A
1069	#N/A
1070	#N/A
1071	#N/A
1072	#N/A
1073	#N/A
1074	#N/A
1075	#N/A
1076	#N/A
1077	#N/A
1078	#N/A
1079	#N/A
1080	#N/A
1081	#N/A
1082	#N/A
1083	#N/A
1084	#N/A
1085	#N/A
1086	#N/A
1087	#N/A
1088	#N/A
1089	#N/A
1090	#N/A
1091	#N/A
1092	#N/A
1093	#N/A
1094	#N/A
1095	#N/A
1096	#N/A
1097	#N/A
1098	#N/A
1099	#N/A
1100	#N/A
1101	#N/A
1102	#N/A
1103	#N/A
1104	#N/A
1105	#N/A
1106	#N/A
1107	#N/A
1108	#N/A
1109	#N/A
1110	#N/A
1111	#N/A
1112	#N/A
1113	#N/A
1114	#N/A
1115	#N/A
1116	#N/A
1117	#N/A
1118	#N/A
1119	#N/A
1120	#N/A
1121	#N/A
1122	#N/A
1123	#N/A
1124	#N/A
1125	#N/A
1126	#N/A
1127	#N/A
1128	#N/A
1129	#N/A
1130	#N/A
1131	#N/A
1132	#N/A
1133	#N/A
1134	#N/A
1135	#N/A
1136	#N/A
1137	#N/A
1138	#N/A
1139	#N/A
1140	#N/A
1141	#N/A
1142	#N/A
1143	#N/A
1144	#N/A
1145	#N/A
1146	#N/A
1147	#N/A
1148	#N/A
1149	#N/A
1150	#N/A
1151	#N/A
1152	#N/A
1153	#N/A
1154	#N/A
1155	#N/A
1156	#N/A
1157	#N/A
1158	#N/A
1159	#N/A
1160	#N/A
1161	#N/A
1162	#N/A
1163	#N/A
1164	#N/A
1165	#N/A
1166	#N/A
1167	#N/A
1168	#N/A
1169	#N/A
1170	#N/A
1171	#N/A
1172	#N/A
1173	#N/A
1174	#N/A
1175	#N/A
1176	#N/A
1177	#N/A
1178	#N/A
1179	#N/A
1180	#N/A
1181	#N/A
1182	#N/A
1183	#N/A
1184	#N/A
1185	#N/A
1186	#N/A
1187	#N/A
1188	#N/A
1189	#N/A
1190	#N/A
1191	#N/A
1192	#N/A
1193	#N/A
1194	#N/A
1195	#N/A
1196	#N/A
1197	#N/A
1198	#N/A
1199	#N/A
1200	#N/A
1201	#N/A
1202	#N/A
1203	#N/A
1204	#N/A
1205	#N/A
1206	#N/A
1207	#N/A
1208	#N/A
1209	#N/A
1210	#N/A
1211	#N/A
1212	#N/A
1213	#N/A
1214	#N/A
1215	#N/A
1216	#N/A
1217	#N/A
1218	#N/A
1219	#N/A
1220	#N/A
1221	#N/A
1222	#N/A
1223	#N/A
1224	#N/A
1225	#N/A
1226	#N/A
1227	#N/A
1228	#N/A
1229	#N/A
1230	#N/A
1231	#N/A
1232	#N/A
1233	#N/A
1234	#N/A
1235	#N/A
1236	#N/A
1237	#N/A
1238	#N/A
1239	#N/A
1240	#N/A
1241	#N/A
1242	#N/A
1243	#N/A
1244	#N/A
1245	#N/A
1246	#N/A
1247	#N/A
1248	#N/A
1249	#N/A
1250	#N/A
1251	#N/A
1252	#N/A
1253	#N/A
1254	#N/A
1255	#N/A
1256	#N/A
1257	#N/A
1258	#N/A
1259	#N/A
1260	#N/A
1261	#N/A
1262	#N/A
1263	#N/A
1264	#N/A
1265	#N/A
1266	#N/A
1267	#N/A
1268	#N/A
1269	#N/A
1270	#N/A
1271	#N/A
1272	#N/A
1273	#N/A
1274	#N/A
1275	#N/A
1276	#N/A
1277	#N/A
1278	#N/A
1279	#N/A
1280	#N/A
1281	#N/A
1282	#N/A
1283	#N/A
1284	#N/A
1285	#N/A
1286	#N/A
1287	#N/A
1288	#N/A
1289	#N/A
1290	#N/A
1291	#N/A
1292	#N/A
1293	#N/A
1294	#N/A
1295	#N/A
1296	#N/A
1297	#N/A
1298	#N/A
1299	#N/A
1300	#N/A
1301	#N/A
1302	#N/A
1303	#N/A
1304	#N/A
1305	#N/A
1306	#N/A
1307	#N/A
1308	#N/A
1309	#N/A
1310	#N/A
1311	#N/A
1312	#N/A
1313	#N/A
1314	#N/A
1315	#N/A
1316	#N/A
1317	#N/A
1318	#N/A
1319	#N/A
1320	#N/A
1321	#N/A
1322	#N/A
1323	#N/A
1324	#N/A
1325	#N/A
1326	#N/A
1327	#N/A
1328	#N/A
1329	#N/A
1330	#N/A
1331	#N/A
1332	#N/A
1333	#N/A
1334	#N/A
1335	#N/A
1336	#N/A
1337	#N/A
1338	#N/A
1339	#N/A
1340	#N/A
1341	#N/A
1342	#N/A
1343	#N/A
1344	#N/A
1345	#N/A
1346	#N/A
1347	#N/A
1348	#N/A
1349	#N/A
1350	#N/A
1351	#N/A
1352	#N/A
1353	#N/A
1354	#N/A
1355	#N/A
1356	#N/A
1357	#N/A
1358	#N/A
1359	#N/A
1360	#N/A
1361	#N/A
1362	#N/A
1363	#N/A
1364	#N/A
1365	#N/A
1366	#N/A
1367	#N/A
1368	#N/A
1369	#N/A
1370	#N/A
1371	#N/A
1372	#N/A
1373	#N/A
1374	#N/A
1375	#N/A
1376	#N/A
1377	#N/A
1378	#N/A
1379	#N/A
1380	#N/A
1381	#N/A
1382	#N/A
1383	#N/A
1384	#N/A
1385	#N/A
1386	#N/A
1387	#N/A
1388	#N/A
1389	#N/A
1390	#N/A
1391	#N/A
1392	#N/A
1393	#N/A
1394	#N/A
1395	#N/A
1396	#N/A
1397	#N/A
1398	#N/A
1399	#N/A
1400	#N/A
1401	#N/A
1402	#N/A
1403	#N/A
1404	#N/A
1405	#N/A
1406	#N/A
1407	#N/A
1408	#N/A
1409	#N/A
1410	#N/A
1411	#N/A
1412	#N/A
1413	#N/A
1414	#N/A
1415	#N/A
1416	#N/A
1417	#N/A
1418	#N/A
1419	#N/A
1420	#N/A
1421	#N/A
1422	#N/A
1423	#N/A
1424	#N/A
1425	#N/A
1426	#N/A
1427	#N/A
1428	#N/A
1429	#N/A
1430	#N/A
1431	#N/A
1432	#N/A
1433	#N/A
1434	#N/A
1435	#N/A
1436	#N/A
1437	#N/A
1438	#N/A
1439	#N/A
1440	#N/A
1441	#N/A
1442	#N/A
1443	#N/A
1444	#N/A
1445	#N/A
1446	#N/A
1447	#N/A
1448	#N/A
1449	#N/A
1450	#N/A
1451	#N/A
1452	#N/A
1453	#N/A
1454	#N/A
1455	#N/A
1456	#N/A
1457	#N/A
1458	#N/A
1459	#N/A
1460	#N/A
1461	#N/A
1462	#N/A
1463	#N/A
1464	#N/A
1465	#N/A
1466	#N/A
1467	#N/A
1468	#N/A
1469	#N/A
1470	#N/A
1471	#N/A
1472	#N/A
1473	#N/A
1474	#N/A
1475	#N/A
1476	#N/A
1477	#N/A
1478	#N/A
1479	#N/A
1480	#N/A
1481	#N/A
1482	#N/A
1483	#N/A
1484	#N/A
1485	#N/A
1486	#N/A
1487	#N/A
1488	#N/A
1489	#N/A
1490	#N/A
1491	#N/A
1492	#N/A
1493	#N/A
1494	#N/A
1495	#N/A
1496	#N/A
1497	#N/A
1498	#N/A
1499	#N/A
1500	#N/A
1501	#N/A
1502	#N/A
1503	#N/A
1504	#N/A
1505	#N/A
1506	#N/A
1507	#N/A
1508	#N/A
1509	#N/A
1510	#N/A
1511	#N/A
1512	#N/A
1513	#N/A
1514	#N/A
1515	#N/A
1516	#N/A
1517	#N/A
1518	#N/A
1519	#N/A
1520	#N/A
1521	#N/A
1522	#N/A
1523	#N/A
1524	#N/A
1525	#N/A
1526	#N/A
1527	#N/A
1528	#N/A
1529	#N/A
1530	#N/A
1531	#N/A
1532	#N/A
1533	#N/A
1534	#N/A
1535	#N/A
1536	#N/A
1537	#N/A
1538	#N/A
1539	#N/A
1540	#N/A
1541	#N/A
1542	#N/A
1543	#N/A
1544	#N/A
1545	#N/A
1546	#N/A
1547	#N/A
1548	#N/A
1549	#N/A
1550	#N/A
1551	#N/A
1552	#N/A
1553	#N/A
1554	#N/A
1555	#N/A
1556	#N/A
1557	#N/A
1558	#N/A
1559	#N/A
1560	#N/A
1561	#N/A
1562	#N/A
1563	#N/A
1564	#N/A
1565	#N/A
1566	#N/A
1567	#N/A
1568	#N/A
1569	#N/A
1570	#N/A
1571	#N/A
1572	#N/A
1573	#N/A
1574	#N/A
1575	#N/A
1576	#N/A
1577	#N/A
1578	#N/A
1579	#N/A
1580	#N/A
1581	#N/A
1582	#N/A
1583	#N/A
1584	#N/A
1585	#N/A
1586	#N/A
1587	#N/A
1588	#N/A
1589	#N/A
1590	#N/A
1591	#N/A
1592	#N/A
1593	#N/A
1594	#N/A
1595	#N/A
1596	#N/A
1597	#N/A
1598	#N/A
1599	#N/A
1600	#N/A
1601	#N/A
1602	#N/A
1603	#N/A
1604	#N/A
1605	#N/A
1606	#N/A
1607	#N/A
1608	#N/A
1609	#N/A
1610	#N/A
1611	#N/A
1612	#N/A
1613	#N/A
1614	#N/A
1615	#N/A
1616	#N/A
1617	#N/A
1618	#N/A
1619	#N/A
1620	#N/A
1621	#N/A
1622	#N/A
1623	#N/A
1624	#N/A
1625	#N/A
1626	#N/A
1627	#N/A
1628	#N/A
1629	#N/A
1630	#N/A
1631	#N/A
1632	#N/A
1633	#N/A
1634	#N/A
1635	#N/A
1636	#N/A
1637	#N/A
1638	#N/A
1639	#N/A
1640	#N/A
1641	#N/A
1642	#N/A
1643	#N/A
1644	#N/A
1645	#N/A
1646	#N/A
1647	#N/A
1648	#N/A
1649	#N/A
1650	#N/A
1651	#N/A
1652	#N/A
1653	#N/A
1654	#N/A
1655	#N/A
1656	#N/A
1657	#N/A
1658	#N/A
1659	#N/A
1660	#N/A
1661	#N/A
1662	#N/A
1663	#N/A
1664	#N/A
1665	#N/A
1666	#N/A
1667	#N/A
1668	#N/A
1669	#N/A
1670	#N/A
1671	#N/A
1672	#N/A
1673	#N/A
1674	#N/A
1675	#N/A
1676	#N/A
1677	#N/A
1678	#N/A
1679	#N/A
1680	#N/A
1681	#N/A
1682	#N/A
1683	#N/A
1684	#N/A
1685	#N/A
1686	#N/A
1687	#N/A
1688	#N/A
1689	#N/A
1690	#N/A
1691	#N/A
1692	#N/A
1693	#N/A
1694	#N/A
1695	#N/A
1696	#N/A
1697	#N/A
1698	#N/A
1699	#N/A
1700	#N/A
1701	#N/A
1702	#N/A
1703	#N/A
1704	#N/A
1705	#N/A
1706	#N/A
1707	#N/A
1708	#N/A
1709	#N/A
1710	#N/A
1711	#N/A
1712	#N/A
1713	#N/A
1714	#N/A
1715	#N/A
1716	#N/A
1717	#N/A
1718	#N/A
1719	#N/A
1720	#N/A
1721	#N/A
1722	#N/A
1723	#N/A
1724	#N/A
1725	#N/A
1726	#N/A
1727	#N/A
1728	#N/A
1729	#N/A
1730	#N/A
1731	#N/A
1732	#N/A
1733	#N/A
1734	#N/A
1735	#N/A
1736	#N/A
1737	#N/A
1738	#N/A
1739	#N/A
1740	#N/A
1741	#N/A
1742	#N/A
1743	#N/A
1744	#N/A
1745	#N/A
1746	#N/A
1747	#N/A
1748	#N/A
1749	#N/A
1750	#N/A
1751	#N/A
1752	#N/A
1753	#N/A
1754	#N/A
1755	#N/A
1756	#N/A
1757	#N/A
1758	#N/A
1759	#N/A
1760	#N/A
1761	#N/A
1762	#N/A
1763	#N/A
1764	#N/A
1765	#N/A
1766	#N/A
1767	#N/A
1768	#N/A
1769	#N/A
1770	#N/A
1771	#N/A
1772	#N/A
1773	#N/A
1774	#N/A
1775	#N/A
1776	#N/A
1777	#N/A
1778	#N/A
1779	#N/A
1780	#N/A
1781	#N/A
1782	#N/A
1783	#N/A
1784	#N/A
1785	#N/A
1786	#N/A
1787	#N/A
1788	#N/A
1789	#N/A
1790	#N/A
1791	#N/A
1792	#N/A
1793	#N/A
1794	#N/A
1795	#N/A
1796	#N/A
1797	#N/A
1798	#N/A
1799	#N/A
1800	#N/A
1801	#N/A
1802	#N/A
1803	#N/A
1804	#N/A
1805	#N/A
1806	#N/A
1807	#N/A
1808	#N/A
1809	#N/A
1810	#N/A
1811	#N/A
1812	#N/A
1813	#N/A
1814	#N/A
1815	#N/A
1816	#N/A
1817	#N/A
1818	#N/A
1819	#N/A
1820	#N/A
1821	#N/A
1822	#N/A
1823	#N/A
1824	#N/A
1825	#N/A
1826	#N/A
1827	#N/A
1828	#N/A
1829	#N/A
1830	#N/A
1831	#N/A
1832	#N/A
1833	#N/A
1834	#N/A
1835	#N/A
1836	#N/A
1837	#N/A
1838	#N/A
1839	#N/A
1840	#N/A
1841	#N/A
1842	#N/A
1843	#N/A
1844	#N/A
1845	#N/A
1846	#N/A
1847	#N/A
1848	#N/A
1849	#N/A
1850	#N/A
1851	#N/A
1852	#N/A
1853	#N/A
1854	#N/A
1855	#N/A
1856	#N/A
1857	#N/A
1858	#N/A
1859	#N/A
1860	#N/A
1861	#N/A
1862	#N/A
1863	#N/A
1864	#N/A
1865	#N/A
1866	#N/A
1867	#N/A
1868	#N/A
1869	#N/A
1870	#N/A
1871	#N/A
1872	#N/A
1873	#N/A
1874	#N/A
1875	#N/A
1876	#N/A
1877	#N/A
1878	#N/A
1879	#N/A
1880	#N/A
1881	#N/A
1882	#N/A
1883	#N/A
1884	#N/A
1885	#N/A
1886	#N/A
1887	#N/A
1888	#N/A
1889	#N/A
1890	#N/A
1891	#N/A
1892	#N/A
1893	#N/A
1894	#N/A
1895	#N/A
1896	#N/A
1897	#N/A
1898	#N/A
1899	#N/A
1900	#N/A
1901	#N/A
1902	#N/A
1903	#N/A
1904	#N/A
1905	#N/A
1906	#N/A
1907	#N/A
1908	#N/A
1909	#N/A
1910	#N/A
1911	#N/A
1912	#N/A
1913	#N/A
1914	#N/A
1915	#N/A
1916	#N/A
1917	#N/A
1918	#N/A
1919	#N/A
1920	#N/A
1921	#N/A
1922	#N/A
1923	#N/A
1924	#N/A
1925	#N/A
1926	#N/A
1927	#N/A
1928	#N/A
1929	#N/A
1930	#N/A
1931	#N/A
1932	#N/A
1933	#N/A
1934	#N/A
1935	#N/A
1936	#N/A
1937	#N/A
1938	#N/A
1939	#N/A
1940	#N/A
1941	#N/A
1942	#N/A
1943	#N/A
1944	#N/A
1945	#N/A
1946	#N/A
1947	#N/A
1948	#N/A
1949	#N/A
1950	#N/A
1951	#N/A
1952	#N/A
1953	#N/A
1954	#N/A
1955	#N/A
1956	#N/A
1957	#N/A
1958	#N/A
1959	#N/A
1960	#N/A
1961	#N/A
1962	#N/A
1963	#N/A
1964	#N/A
1965	#N/A
1966	#N/A
1967	#N/A
1968	#N/A
1969	#N/A
1970	#N/A
1971	#N/A
1972	#N/A
1973	#N/A
1974	#N/A
1975	#N/A
1976	#N/A
1977	#N/A
1978	#N/A
1979	#N/A
1980	#N/A
1981	#N/A
1982	#N/A
1983	#N/A
1984	#N/A
1985	#N/A
1986	#N/A
1987	#N/A
1988	#N/A
1989	#N/A
1990	#N/A
1991	#N/A
1992	#N/A
1993	#N/A
1994	#N/A
1995	#N/A
1996	#N/A
1997	#N/A
1998	#N/A
1999	#N/A
[truncated: 3,899 more rows]
