# Supplementary material for: Time-varying asymmetry and tail thickness in long series of daily financial returns
Source: publisher site journal article supplement (doi:10.1515/snde-2017-0071), 2018-10-02
Supplement: Supplementary file 295 [file mq.xlsx]

## Sheet: 1
	quantile	delta	rho	alpha0	alpha1-	beta1	alpha1+	lambda1	ni1	ni2	a00	h0	gamma_s0	gamma_s1	gamma_s2	gamma_s3	gamma_c0	gamma_c1	gamma_c2	gamma_c3	phi0	phi1	phi2	phi3
1	0.005	-0.03826	0.13854	0.0064935	0.086184	0.915889	0.002913	-0.03459	4.381	6.6035	0.474425	0.0336	-0.48855	-0.5217	-1.0434	-0.465	0.29555	-0.4325	-1.2381	-0.5401	0.00060342	0.0017039	0.00060476	0.00094
2	0.01	-0.03294	0.140525	0.006754	0.087805	0.91734	0.003467	-0.02871	4.4631	6.755	0.476545	0.0449	-0.4693	-0.5007	-1.0066	-0.4297	0.3141	-0.41105	-1.1917	-0.4986	0.00060366	0.0017158	0.00060613	0.0009665
3	0.015	-0.03003	0.14168	0.0069295	0.088845	0.918222	0.003845	-0.02484	4.5134	6.862	0.477905	0.0516	-0.45545	-0.4886	-0.9789	-0.4052	0.32545	-0.39655	-1.1643	-0.4741	0.00060383	0.0017238	0.00060692	0.0009825
4	0.02	-0.0279	0.142605	0.007064	0.089672	0.918878	0.004175	-0.02209	4.5534	6.9455	0.478835	0.0574	-0.4464	-0.4789	-0.9602	-0.3863	0.33375	-0.3863	-1.1455	-0.4543	0.00060399	0.0017298	0.00060776	0.0009955
5	0.025	-0.02618	0.143325	0.007174	0.090315	0.919431	0.004439	-0.01971	4.5879	7.017	0.47959	0.0631	-0.43925	-0.47055	-0.9448	-0.3706	0.34075	-0.37925	-1.1283	-0.4379	0.00060423	0.0017344	0.00060845	0.001005
6	0.03	-0.0248	0.143935	0.0072655	0.090846	0.919866	0.004699	-0.01768	4.6182	7.0805	0.480225	0.0686	-0.43305	-0.46345	-0.9312	-0.3555	0.34705	-0.37305	-1.1159	-0.4239	0.00060453	0.0017384	0.00060921	0.0010135
7	0.035	-0.02357	0.144475	0.007344	0.091345	0.920255	0.004918	-0.01587	4.6445	7.132	0.48081	0.0734	-0.4269	-0.45705	-0.9181	-0.3411	0.35235	-0.36735	-1.1047	-0.4122	0.00060474	0.0017416	0.00060984	0.00102
8	0.04	-0.02248	0.144985	0.0074135	0.091762	0.92059	0.005139	-0.01436	4.667	7.178	0.481315	0.0783	-0.4209	-0.4513	-0.9062	-0.3283	0.357	-0.36245	-1.0942	-0.402	0.00060497	0.0017446	0.00061044	0.001026
9	0.045	-0.02146	0.145455	0.007478	0.092156	0.920914	0.005313	-0.01297	4.6885	7.22	0.4818	0.0828	-0.4159	-0.44605	-0.8954	-0.316	0.36095	-0.35815	-1.0845	-0.3923	0.00060517	0.0017472	0.00061095	0.001031
10	0.05	-0.02048	0.14589	0.0075375	0.092512	0.92117	0.005485	-0.01168	4.7072	7.255	0.48222	0.0868	-0.4112	-0.4416	-0.8853	-0.3043	0.3646	-0.3543	-1.0759	-0.383	0.0006054	0.0017496	0.00061146	0.001035
11	0.055	-0.01964	0.146285	0.007595	0.092812	0.921424	0.005648	-0.01044	4.724	7.2915	0.482595	0.0905	-0.4068	-0.4375	-0.8764	-0.2929	0.3682	-0.3502	-1.068	-0.3743	0.00060558	0.0017519	0.00061194	0.0010395
12	0.06	-0.01891	0.146635	0.0076475	0.093098	0.921668	0.005789	-0.00933	4.7399	7.3265	0.48293	0.0941	-0.40275	-0.4336	-0.8682	-0.2814	0.3717	-0.3463	-1.0608	-0.3668	0.00060573	0.001754	0.00061242	0.0010435
13	0.065	-0.01824	0.14698	0.007698	0.093386	0.921887	0.005924	-0.00831	4.7545	7.3565	0.48325	0.0977	-0.39905	-0.42985	-0.8607	-0.2707	0.37505	-0.34265	-1.0543	-0.3589	0.00060588	0.0017559	0.00061286	0.001047
14	0.07	-0.01752	0.147285	0.007746	0.093648	0.922093	0.006054	-0.00728	4.7684	7.3855	0.48356	0.1012	-0.39525	-0.42635	-0.8533	-0.26	0.37835	-0.3393	-1.0481	-0.3509	0.00060608	0.0017578	0.00061334	0.00105
15	0.075	-0.01688	0.147565	0.00779	0.093888	0.922296	0.006178	-0.00638	4.7826	7.413	0.483855	0.1044	-0.3919	-0.4231	-0.8459	-0.2498	0.38155	-0.33615	-1.0428	-0.3435	0.0006063	0.0017596	0.0006138	0.001053
16	0.08	-0.01629	0.14781	0.007832	0.094118	0.92248	0.006293	-0.00549	4.7956	7.44	0.48413	0.1076	-0.38845	-0.42005	-0.8389	-0.2397	0.38425	-0.3328	-1.0375	-0.3366	0.00060652	0.0017613	0.00061423	0.001056
17	0.085	-0.0157	0.148055	0.007869	0.094347	0.922675	0.00641	-0.00466	4.8082	7.465	0.48442	0.1107	-0.3852	-0.41705	-0.8324	-0.2292	0.3869	-0.32985	-1.0323	-0.3302	0.00060673	0.0017629	0.0006147	0.0010585
18	0.09	-0.01512	0.148305	0.007905	0.094548	0.922846	0.006523	-0.00389	4.8222	7.49	0.484695	0.1137	-0.38215	-0.41445	-0.8259	-0.2185	0.3894	-0.32695	-1.0274	-0.3238	0.00060699	0.0017644	0.00061514	0.001061
19	0.095	-0.01463	0.148535	0.007938	0.09474	0.923015	0.006633	-0.00308	4.8346	7.514	0.48494	0.1166	-0.3792	-0.4118	-0.8196	-0.2085	0.39195	-0.3242	-1.0228	-0.3177	0.00060728	0.0017657	0.00061564	0.0010635
20	0.1	-0.01409	0.14877	0.0079725	0.094937	0.923176	0.006733	-0.00232	4.8461	7.537	0.48517	0.1196	-0.37635	-0.4093	-0.8135	-0.1986	0.3943	-0.32145	-1.0183	-0.3115	0.00060757	0.001767	0.00061613	0.001066
21	0.105	-0.01358	0.14899	0.008004	0.095125	0.923329	0.006829	-0.00158	4.857	7.557	0.485375	0.1226	-0.3735	-0.4068	-0.808	-0.1887	0.39655	-0.31875	-1.0141	-0.3056	0.00060787	0.0017683	0.00061659	0.0010685
22	0.11	-0.0131	0.149205	0.008034	0.0953	0.923481	0.006928	-0.00088	4.868	7.578	0.485595	0.1255	-0.37075	-0.4045	-0.8022	-0.1785	0.3988	-0.31615	-1.0098	-0.2998	0.00060821	0.0017695	0.00061707	0.0010705
23	0.115	-0.01264	0.1494	0.0080645	0.095466	0.923621	0.007018	-0.0002	4.8791	7.5985	0.485805	0.1284	-0.3684	-0.40205	-0.7962	-0.1673	0.40115	-0.31355	-1.0057	-0.2938	0.00060851	0.0017706	0.00061756	0.0010725
24	0.12	-0.01221	0.14959	0.0080935	0.095633	0.923763	0.007109	0.00044	4.8895	7.619	0.485995	0.1312	-0.36605	-0.39965	-0.7908	-0.1561	0.4033	-0.31125	-1.0019	-0.2883	0.00060877	0.0017718	0.00061801	0.0010745
25	0.125	-0.01179	0.149765	0.008123	0.0958	0.923897	0.007198	0.00112	4.8995	7.6385	0.48619	0.134	-0.3638	-0.3975	-0.7855	-0.1451	0.40535	-0.3089	-0.9982	-0.2824	0.00060905	0.0017729	0.00061846	0.0010765
26	0.13	-0.01137	0.14995	0.0081515	0.095956	0.924025	0.007291	0.00173	4.909	7.6575	0.486385	0.1367	-0.3616	-0.39515	-0.7799	-0.1352	0.40735	-0.3066	-0.9943	-0.2764	0.00060933	0.0017741	0.00061892	0.0010785
27	0.135	-0.01099	0.15014	0.0081795	0.096111	0.924153	0.007378	0.00232	4.9184	7.677	0.486575	0.1395	-0.3595	-0.393	-0.7743	-0.1252	0.40945	-0.3044	-0.9907	-0.2707	0.00060962	0.0017752	0.00061938	0.0010805
28	0.14	-0.0106	0.15032	0.008206	0.096267	0.924273	0.007469	0.00289	4.9272	7.6955	0.486765	0.1419	-0.3574	-0.3909	-0.7691	-0.1147	0.4114	-0.3022	-0.9872	-0.2646	0.00060995	0.0017763	0.00061989	0.0010825
29	0.145	-0.01023	0.1505	0.008233	0.096425	0.924395	0.007556	0.00344	4.9364	7.713	0.486935	0.1444	-0.3552	-0.38895	-0.764	-0.1027	0.41335	-0.2999	-0.9837	-0.259	0.00061031	0.0017772	0.00062036	0.001084
30	0.15	-0.00987	0.15067	0.0082575	0.096566	0.924515	0.007639	0.00398	4.9456	7.732	0.4871	0.1469	-0.3531	-0.387	-0.7588	-0.091	0.41525	-0.29795	-0.9802	-0.2533	0.00061065	0.0017782	0.00062081	0.001086
31	0.155	-0.00951	0.15084	0.0082835	0.096714	0.924627	0.007723	0.00455	4.9542	7.7505	0.487275	0.1494	-0.351	-0.385	-0.7539	-0.0798	0.41705	-0.2959	-0.9769	-0.2479	0.00061096	0.0017792	0.00062126	0.0010875
32	0.16	-0.00918	0.151005	0.008309	0.096852	0.924743	0.007801	0.00509	4.9632	7.7695	0.487445	0.1517	-0.34905	-0.3831	-0.7489	-0.0685	0.41875	-0.29395	-0.9736	-0.2424	0.00061127	0.0017801	0.0006217	0.001089
33	0.165	-0.00883	0.151155	0.008335	0.096993	0.924853	0.007878	0.00564	4.9717	7.788	0.487605	0.1541	-0.34695	-0.38105	-0.7442	-0.0573	0.4205	-0.2919	-0.9705	-0.2371	0.00061156	0.001781	0.00062215	0.0010905
34	0.17	-0.00851	0.151305	0.00836	0.097127	0.924968	0.007952	0.00615	4.9799	7.8065	0.48777	0.1566	-0.3451	-0.3791	-0.7394	-0.0468	0.42215	-0.29	-0.9671	-0.2319	0.00061184	0.0017819	0.00062262	0.001092
35	0.175	-0.00817	0.15145	0.0083835	0.097263	0.925076	0.008024	0.00666	4.9879	7.8235	0.48793	0.159	-0.34305	-0.37715	-0.7344	-0.0355	0.42375	-0.2881	-0.9638	-0.2269	0.00061211	0.0017827	0.00062311	0.0010935
36	0.18	-0.00786	0.1516	0.008407	0.097389	0.925183	0.008097	0.00718	4.9958	7.8405	0.488085	0.1614	-0.34125	-0.37525	-0.7297	-0.0241	0.42555	-0.28625	-0.9607	-0.2218	0.00061235	0.0017837	0.00062359	0.001095
37	0.185	-0.00755	0.15175	0.00843	0.097517	0.925285	0.008172	0.0077	5.0039	7.857	0.48825	0.1635	-0.3395	-0.3735	-0.7251	-0.0128	0.42725	-0.2842	-0.9576	-0.2165	0.0006126	0.0017845	0.00062406	0.0010965
38	0.19	-0.00725	0.1519	0.008451	0.09764	0.92539	0.008245	0.00818	5.0114	7.8735	0.48839	0.1658	-0.3378	-0.3718	-0.7205	-0.0009	0.4289	-0.28235	-0.9544	-0.2111	0.00061286	0.0017854	0.00062452	0.001098
39	0.195	-0.00695	0.15204	0.008473	0.097765	0.925489	0.008316	0.00865	5.0188	7.8905	0.48854	0.1681	-0.33605	-0.3701	-0.7159	0.0107	0.4305	-0.2805	-0.9513	-0.2056	0.00061311	0.0017863	0.00062501	0.0010995
40	0.2	-0.00663	0.15218	0.008494	0.097885	0.925587	0.008389	0.00914	5.0262	7.9075	0.48869	0.1703	-0.33425	-0.3684	-0.7112	0.0217	0.43205	-0.27865	-0.9484	-0.2001	0.00061334	0.0017871	0.00062546	0.001101
41	0.205	-0.00633	0.152315	0.008515	0.098003	0.925689	0.008457	0.00959	5.0337	7.9245	0.48883	0.1726	-0.3326	-0.3667	-0.7064	0.0318	0.4337	-0.2767	-0.9455	-0.1941	0.00061358	0.0017879	0.00062593	0.0011025
42	0.21	-0.00601	0.15246	0.0085355	0.098121	0.925782	0.008526	0.01005	5.0409	7.942	0.488975	0.1749	-0.331	-0.36505	-0.7016	0.0417	0.43525	-0.27495	-0.9427	-0.1887	0.00061385	0.0017887	0.00062642	0.001104
43	0.215	-0.00573	0.152595	0.008556	0.098245	0.925878	0.00859	0.01051	5.048	7.958	0.48912	0.1771	-0.32925	-0.3635	-0.6968	0.052	0.4368	-0.27315	-0.94	-0.1831	0.00061407	0.0017894	0.00062689	0.0011055
44	0.22	-0.00544	0.15273	0.008577	0.098364	0.925971	0.008654	0.01098	5.0552	7.975	0.489265	0.1793	-0.3276	-0.36185	-0.692	0.0616	0.43825	-0.27135	-0.9374	-0.1773	0.0006143	0.0017902	0.00062736	0.0011065
45	0.225	-0.00514	0.152865	0.0085975	0.098483	0.926061	0.008718	0.01142	5.0627	7.991	0.489405	0.1816	-0.32595	-0.36035	-0.6874	0.0709	0.4398	-0.2696	-0.9347	-0.1721	0.00061454	0.001791	0.00062782	0.001108
46	0.23	-0.00486	0.153	0.008618	0.0986	0.926156	0.008778	0.01187	5.0699	8.007	0.489545	0.1838	-0.3242	-0.35885	-0.6827	0.0802	0.44125	-0.26795	-0.9318	-0.166	0.00061476	0.0017917	0.00062831	0.0011095
47	0.235	-0.00458	0.15313	0.0086385	0.098717	0.926243	0.008839	0.0123	5.0768	8.023	0.48968	0.1861	-0.3225	-0.35725	-0.6783	0.0896	0.44275	-0.2663	-0.9291	-0.1604	0.000615	0.0017925	0.00062882	0.0011105
48	0.24	-0.00431	0.15326	0.008658	0.098836	0.92633	0.008899	0.01276	5.0837	8.0385	0.48981	0.1882	-0.32095	-0.3557	-0.6739	0.098	0.4442	-0.26465	-0.9265	-0.1549	0.00061528	0.0017932	0.0006293	0.001112
49	0.245	-0.00405	0.153385	0.008677	0.098952	0.926418	0.008961	0.01318	5.0909	8.054	0.489945	0.1905	-0.3193	-0.35415	-0.6696	0.106	0.44565	-0.26295	-0.9239	-0.1493	0.00061555	0.001794	0.00062979	0.0011135
50	0.25	-0.00379	0.15351	0.008696	0.099071	0.926502	0.009022	0.01362	5.0974	8.0685	0.490075	0.1928	-0.3177	-0.35255	-0.6651	0.1131	0.447	-0.26125	-0.9213	-0.1435	0.0006158	0.0017947	0.00063028	0.001115
51	0.255	-0.00352	0.153635	0.0087155	0.099184	0.926592	0.009078	0.01403	5.1039	8.0835	0.490205	0.1951	-0.3161	-0.351	-0.6607	0.1207	0.44845	-0.25965	-0.9186	-0.1378	0.00061603	0.0017954	0.00063076	0.001116
52	0.26	-0.00326	0.15376	0.0087345	0.099292	0.926679	0.009136	0.01444	5.1107	8.0975	0.490335	0.1974	-0.3146	-0.34955	-0.6561	0.1284	0.44975	-0.25805	-0.9159	-0.1325	0.00061625	0.0017961	0.00063119	0.0011175
53	0.265	-0.00299	0.153885	0.008753	0.099405	0.926763	0.009193	0.01485	5.1172	8.1135	0.490455	0.1999	-0.31305	-0.34805	-0.6517	0.1356	0.4511	-0.2564	-0.9133	-0.1269	0.00061647	0.0017968	0.00063165	0.0011185
54	0.27	-0.00275	0.154005	0.0087715	0.099509	0.926846	0.009249	0.01524	5.1238	8.1285	0.490585	0.2021	-0.3116	-0.3466	-0.6471	0.1422	0.45245	-0.2547	-0.9107	-0.1209	0.00061673	0.0017975	0.00063213	0.00112
55	0.275	-0.00249	0.154125	0.00879	0.099613	0.926928	0.009308	0.01563	5.1304	8.1435	0.49071	0.2044	-0.3101	-0.34515	-0.6427	0.1485	0.45385	-0.2531	-0.9082	-0.115	0.00061696	0.0017982	0.00063263	0.0011215
56	0.28	-0.00225	0.154245	0.008808	0.099717	0.927009	0.009364	0.01602	5.1372	8.158	0.490835	0.2067	-0.30865	-0.34375	-0.6386	0.1549	0.4552	-0.25145	-0.9056	-0.1093	0.00061721	0.0017988	0.00063309	0.0011225
57	0.285	-0.002	0.15436	0.0088265	0.099817	0.92709	0.009417	0.01642	5.1438	8.173	0.49096	0.2091	-0.30715	-0.34235	-0.6341	0.1613	0.45655	-0.24985	-0.9031	-0.1036	0.00061747	0.0017995	0.00063358	0.001124
58	0.29	-0.00175	0.154475	0.008844	0.099927	0.927172	0.009473	0.01681	5.1505	8.188	0.491085	0.2114	-0.30565	-0.3409	-0.6299	0.1673	0.45785	-0.2482	-0.9004	-0.0978	0.00061774	0.0018001	0.00063406	0.001125
59	0.295	-0.0015	0.15459	0.0088615	0.100026	0.927256	0.009526	0.0172	5.1567	8.202	0.491215	0.2136	-0.30415	-0.33945	-0.6255	0.1732	0.45915	-0.24655	-0.8979	-0.0918	0.000618	0.0018008	0.00063458	0.0011265
60	0.3	-0.00126	0.154705	0.008879	0.100133	0.927333	0.00958	0.01759	5.1633	8.2165	0.49134	0.2159	-0.3027	-0.33805	-0.6214	0.1787	0.4605	-0.24495	-0.8954	-0.0862	0.00061825	0.0018014	0.0006351	0.0011275
61	0.305	-0.00101	0.154815	0.0088965	0.10024	0.927407	0.009635	0.01795	5.1695	8.231	0.49146	0.2182	-0.3012	-0.33665	-0.6174	0.1843	0.4618	-0.24345	-0.893	-0.0807	0.00061851	0.0018021	0.00063561	0.0011285
62	0.31	-0.00076	0.15492	0.008914	0.100346	0.927484	0.009688	0.01833	5.1754	8.2455	0.49158	0.2205	-0.2997	-0.3353	-0.6131	0.1896	0.46315	-0.24185	-0.8905	-0.0752	0.00061879	0.0018027	0.00063612	0.00113
63	0.315	-0.00052	0.15503	0.0089315	0.100446	0.927558	0.00974	0.01872	5.1815	8.26	0.491695	0.2227	-0.2983	-0.33385	-0.6088	0.1949	0.46445	-0.2402	-0.888	-0.0699	0.00061902	0.0018034	0.00063661	0.001131
64	0.32	-0.00029	0.155145	0.0089485	0.100546	0.927633	0.009793	0.01906	5.1877	8.2735	0.491815	0.225	-0.2968	-0.3324	-0.6047	0.2001	0.46575	-0.2386	-0.8856	-0.0645	0.00061926	0.001804	0.00063708	0.0011325
65	0.325	-6e-05	0.155255	0.0089655	0.100639	0.927708	0.009842	0.01943	5.1937	8.2875	0.49193	0.2272	-0.2954	-0.33095	-0.6004	0.2049	0.46705	-0.23705	-0.8833	-0.0593	0.0006195	0.0018046	0.00063757	0.0011335
66	0.33	0.00018	0.15536	0.008983	0.10074	0.927781	0.009892	0.0198	5.1998	8.3025	0.492045	0.2295	-0.29395	-0.3296	-0.5963	0.2098	0.4683	-0.2354	-0.8809	-0.0541	0.00061974	0.0018052	0.0006381	0.0011345
67	0.335	0.00041	0.155465	0.009	0.10084	0.927853	0.009946	0.02016	5.2053	8.3165	0.492165	0.2319	-0.29255	-0.32825	-0.5921	0.2144	0.46955	-0.2338	-0.8784	-0.049	0.00062	0.0018058	0.0006386	0.001136
68	0.34	0.00065	0.155575	0.009017	0.100936	0.92793	0.009996	0.02052	5.2115	8.33	0.49228	0.2341	-0.2912	-0.32685	-0.5878	0.2191	0.4708	-0.2322	-0.8759	-0.0438	0.00062029	0.0018065	0.00063909	0.001137
69	0.345	0.00089	0.15568	0.0090335	0.10103	0.928004	0.010048	0.02088	5.2173	8.343	0.492405	0.2363	-0.2898	-0.3254	-0.5837	0.2236	0.47205	-0.23065	-0.8735	-0.0382	0.00062056	0.0018071	0.00063957	0.001138
70	0.35	0.00111	0.155785	0.00905	0.101126	0.928071	0.0101	0.02124	5.2234	8.3555	0.49251	0.2388	-0.2884	-0.32395	-0.5796	0.2281	0.4733	-0.2291	-0.8711	-0.0325	0.00062085	0.0018077	0.00064008	0.001139
71	0.355	0.00135	0.155885	0.009067	0.101218	0.928144	0.010148	0.02158	5.2291	8.368	0.49262	0.2411	-0.287	-0.32255	-0.5755	0.2323	0.4746	-0.2276	-0.8688	-0.0272	0.00062113	0.0018083	0.00064053	0.0011405
72	0.36	0.00158	0.15599	0.0090835	0.101312	0.928216	0.010198	0.02193	5.2346	8.382	0.492735	0.2435	-0.28565	-0.3212	-0.5714	0.2366	0.47585	-0.2261	-0.8663	-0.0217	0.00062138	0.0018089	0.000641	0.0011415
73	0.365	0.00181	0.15609	0.009101	0.101405	0.928283	0.010246	0.02228	5.24	8.397	0.49285	0.2458	-0.2843	-0.31985	-0.5675	0.2404	0.47705	-0.2246	-0.8637	-0.0162	0.00062166	0.0018095	0.0006415	0.0011425
74	0.37	0.00203	0.1562	0.0091185	0.101501	0.928353	0.010294	0.02263	5.2461	8.4105	0.49296	0.248	-0.28295	-0.3184	-0.5634	0.2442	0.47825	-0.2231	-0.8613	-0.0109	0.00062192	0.00181	0.000642	0.001144
75	0.375	0.00224	0.1563	0.0091365	0.101605	0.928425	0.010344	0.02299	5.252	8.423	0.49308	0.2503	-0.2816	-0.3171	-0.5591	0.248	0.4796	-0.2216	-0.8588	-0.0057	0.00062222	0.0018107	0.00064252	0.001145
76	0.38	0.00247	0.1564	0.009154	0.101703	0.928492	0.010393	0.02332	5.2576	8.4365	0.493185	0.2526	-0.28025	-0.3157	-0.5553	0.2515	0.48075	-0.2201	-0.8563	-0.0005	0.00062251	0.0018113	0.00064305	0.001146
77	0.385	0.00269	0.156505	0.0091715	0.101802	0.928562	0.010441	0.02367	5.2633	8.45	0.493285	0.255	-0.27885	-0.31435	-0.5515	0.2551	0.4819	-0.21865	-0.854	0.0049	0.00062277	0.0018118	0.00064359	0.001147
78	0.39	0.00293	0.156605	0.0091885	0.101901	0.928634	0.010491	0.024	5.2691	8.463	0.4934	0.2575	-0.27745	-0.313	-0.5476	0.2589	0.4831	-0.21715	-0.8515	0.0098	0.00062303	0.0018125	0.00064411	0.001148
79	0.395	0.00314	0.15671	0.0092055	0.101996	0.928704	0.010537	0.02433	5.2751	8.4765	0.49351	0.2599	-0.2761	-0.31165	-0.5439	0.2623	0.48435	-0.21565	-0.8491	0.0145	0.00062332	0.001813	0.00064463	0.0011495
80	0.4	0.00338	0.15681	0.009222	0.102089	0.928771	0.010584	0.02468	5.2807	8.49	0.493615	0.2623	-0.2748	-0.31025	-0.5401	0.2655	0.4855	-0.2141	-0.8465	0.0192	0.00062359	0.0018136	0.00064515	0.0011505
81	0.405	0.0036	0.156915	0.00924	0.10218	0.92884	0.010634	0.02502	5.2862	8.503	0.49372	0.2647	-0.2734	-0.30885	-0.5364	0.269	0.48665	-0.2125	-0.844	0.0239	0.00062386	0.0018142	0.00064564	0.0011515
82	0.41	0.00382	0.15702	0.0092575	0.102275	0.928905	0.010682	0.02536	5.2918	8.516	0.49383	0.2671	-0.27195	-0.3075	-0.5326	0.2724	0.48785	-0.2109	-0.8415	0.0288	0.00062413	0.0018148	0.00064611	0.0011525
83	0.415	0.00405	0.15713	0.009274	0.102375	0.928972	0.01073	0.02568	5.2978	8.5295	0.493935	0.2696	-0.2706	-0.3061	-0.529	0.2755	0.48915	-0.20935	-0.839	0.0331	0.00062441	0.0018153	0.00064659	0.001154
84	0.42	0.00426	0.15723	0.0092905	0.102471	0.929042	0.010775	0.026	5.3035	8.5425	0.494035	0.2721	-0.2692	-0.30475	-0.525	0.2786	0.4904	-0.20775	-0.8365	0.0377	0.00062467	0.0018159	0.00064707	0.001155
85	0.425	0.00449	0.15733	0.009307	0.102568	0.929108	0.010823	0.02631	5.3092	8.5555	0.494145	0.2746	-0.2678	-0.30335	-0.5216	0.2819	0.49155	-0.2062	-0.834	0.0425	0.00062495	0.0018165	0.00064755	0.001156
86	0.43	0.00472	0.157435	0.0093245	0.102665	0.929175	0.01087	0.02665	5.3145	8.5685	0.494255	0.2771	-0.2664	-0.3019	-0.518	0.2851	0.4927	-0.20465	-0.8314	0.0473	0.00062521	0.0018171	0.00064803	0.001157
87	0.435	0.00493	0.15754	0.0093415	0.102758	0.929241	0.01092	0.02698	5.32	8.582	0.494365	0.2797	-0.26505	-0.30055	-0.5145	0.2881	0.4939	-0.2031	-0.8287	0.052	0.00062547	0.0018176	0.00064854	0.001158
88	0.44	0.00515	0.157645	0.0093575	0.102847	0.92931	0.010967	0.02731	5.3258	8.5955	0.49447	0.2821	-0.26375	-0.2992	-0.5109	0.2911	0.49505	-0.2015	-0.826	0.0567	0.00062575	0.0018182	0.00064905	0.001159
89	0.445	0.00537	0.15775	0.009374	0.102939	0.92938	0.011017	0.02764	5.3315	8.6085	0.49458	0.2847	-0.26235	-0.29785	-0.5074	0.2941	0.49615	-0.20005	-0.8234	0.0613	0.00062603	0.0018188	0.00064954	0.0011605
90	0.45	0.00559	0.157845	0.00939	0.103035	0.929452	0.011064	0.028	5.3372	8.6215	0.49469	0.2874	-0.26095	-0.29655	-0.5037	0.2971	0.49725	-0.19855	-0.8208	0.0659	0.00062632	0.0018193	0.00064998	0.0011615
91	0.455	0.00581	0.15795	0.0094055	0.103131	0.92952	0.011112	0.02833	5.343	8.6345	0.4948	0.2901	-0.2596	-0.2952	-0.5002	0.3	0.4984	-0.19705	-0.8182	0.0706	0.00062663	0.0018199	0.00065045	0.0011625
92	0.46	0.00601	0.158055	0.0094215	0.103224	0.929585	0.01116	0.02867	5.3487	8.648	0.4949	0.2926	-0.25825	-0.2938	-0.4966	0.3027	0.4995	-0.1955	-0.8155	0.0752	0.00062695	0.0018205	0.00065095	0.0011635
93	0.465	0.00623	0.15816	0.009439	0.103314	0.92965	0.011206	0.02901	5.3546	8.6615	0.495015	0.2953	-0.25695	-0.29235	-0.4933	0.3054	0.5006	-0.1939	-0.8128	0.08	0.00062726	0.0018211	0.00065146	0.0011645
94	0.47	0.00646	0.15826	0.009455	0.103408	0.929712	0.01125	0.02934	5.3604	8.6745	0.49512	0.2979	-0.25555	-0.29095	-0.4898	0.3082	0.5018	-0.1923	-0.8102	0.0846	0.0006276	0.0018216	0.00065195	0.0011655
95	0.475	0.00668	0.158365	0.009471	0.1035	0.929778	0.011297	0.02966	5.3661	8.688	0.49523	0.3006	-0.2542	-0.2896	-0.4862	0.3109	0.5029	-0.19075	-0.8075	0.0892	0.00062795	0.0018222	0.00065249	0.0011665
96	0.48	0.00689	0.158465	0.009487	0.103598	0.929846	0.011344	0.03	5.3721	8.7015	0.495335	0.3033	-0.25285	-0.28815	-0.4827	0.3137	0.5041	-0.1892	-0.8049	0.0937	0.00062831	0.0018228	0.000653	0.001168
97	0.485	0.0071	0.158565	0.0095035	0.103691	0.929911	0.011391	0.03033	5.3779	8.7145	0.49544	0.3059	-0.25145	-0.28675	-0.4792	0.3165	0.5052	-0.18745	-0.8022	0.0983	0.00062865	0.0018234	0.00065355	0.001169
98	0.49	0.00729	0.15866	0.0095185	0.103783	0.929979	0.011436	0.03066	5.3836	8.728	0.49554	0.3086	-0.25005	-0.2853	-0.4758	0.3191	0.50635	-0.1859	-0.7995	0.1029	0.00062899	0.0018239	0.00065413	0.00117
99	0.495	0.0075	0.158765	0.009536	0.10388	0.930049	0.011482	0.03099	5.3892	8.741	0.49565	0.3114	-0.2486	-0.2839	-0.4725	0.3217	0.5075	-0.18415	-0.7967	0.1076	0.00062933	0.0018245	0.0006547	0.001171
100	0.5	0.00771	0.15887	0.009553	0.10398	0.930113	0.011528	0.0313	5.395	8.7545	0.49576	0.3141	-0.24725	-0.28245	-0.4692	0.3243	0.50865	-0.18245	-0.794	0.1123	0.00062966	0.0018251	0.00065529	0.0011725
101	0.505	0.00791	0.15896	0.0095695	0.104072	0.930178	0.011574	0.03164	5.4005	8.7675	0.49587	0.3168	-0.2458	-0.2809	-0.4658	0.3268	0.5097	-0.1808	-0.7912	0.1171	0.00063	0.0018256	0.00065587	0.0011735
102	0.51	0.00812	0.15906	0.0095865	0.104169	0.930243	0.01162	0.03195	5.4061	8.7805	0.495975	0.3198	-0.24445	-0.27935	-0.4622	0.3293	0.5109	-0.17925	-0.7885	0.1216	0.00063036	0.0018262	0.00065644	0.0011745
103	0.515	0.00834	0.159165	0.0096025	0.104263	0.93031	0.011666	0.03228	5.4119	8.7935	0.496075	0.3225	-0.24305	-0.27785	-0.4585	0.3317	0.51205	-0.1776	-0.7856	0.1263	0.0006307	0.0018267	0.00065702	0.001176
104	0.52	0.00855	0.159265	0.0096195	0.104359	0.930375	0.011713	0.0326	5.4178	8.8055	0.496185	0.3254	-0.24165	-0.27635	-0.4549	0.3343	0.51325	-0.17595	-0.7828	0.1308	0.00063103	0.0018273	0.00065761	0.001177
105	0.525	0.00878	0.15937	0.0096355	0.104458	0.930439	0.011761	0.0329	5.4235	8.819	0.496285	0.3281	-0.24015	-0.2749	-0.4513	0.3368	0.51445	-0.17435	-0.7799	0.1357	0.00063137	0.0018279	0.00065822	0.001178
106	0.53	0.00899	0.159475	0.009652	0.104553	0.930504	0.011811	0.03324	5.4294	8.832	0.49639	0.3309	-0.2387	-0.27345	-0.4475	0.3393	0.51565	-0.17275	-0.7771	0.1401	0.0006317	0.0018285	0.00065882	0.001179
107	0.535	0.00921	0.15958	0.009669	0.104646	0.930572	0.011856	0.03355	5.4354	8.8445	0.496495	0.3338	-0.23735	-0.2719	-0.4437	0.3416	0.51695	-0.1711	-0.7743	0.1444	0.00063208	0.0018291	0.00065948	0.0011805
108	0.54	0.00943	0.159675	0.0096855	0.104746	0.930639	0.011903	0.03388	5.4413	8.858	0.496605	0.3366	-0.236	-0.2705	-0.4403	0.344	0.5182	-0.1694	-0.7714	0.1491	0.00063247	0.0018297	0.00066015	0.0011815
109	0.545	0.00966	0.159775	0.0097015	0.10484	0.930707	0.01195	0.0342	5.4474	8.871	0.49671	0.3396	-0.23455	-0.2691	-0.4365	0.3463	0.5195	-0.1677	-0.7685	0.1535	0.00063285	0.0018303	0.00066085	0.0011825
110	0.55	0.00987	0.159885	0.009718	0.104938	0.930776	0.011997	0.03452	5.4532	8.8845	0.49682	0.3425	-0.2332	-0.2677	-0.433	0.3488	0.5207	-0.16595	-0.7656	0.1579	0.00063322	0.0018309	0.0006615	0.001184
111	0.555	0.01009	0.159985	0.009733	0.105036	0.930844	0.012043	0.03487	5.4592	8.898	0.49693	0.3455	-0.23185	-0.2662	-0.4292	0.3511	0.52195	-0.16425	-0.7627	0.1625	0.00063359	0.0018315	0.00066218	0.001185
112	0.56	0.01031	0.16009	0.0097485	0.105132	0.930914	0.012091	0.03519	5.465	8.9115	0.49703	0.3487	-0.23045	-0.26475	-0.4255	0.3534	0.52325	-0.1627	-0.7598	0.1672	0.00063395	0.001832	0.0006629	0.001186
113	0.565	0.01054	0.1602	0.0097655	0.105226	0.930982	0.012138	0.03551	5.471	8.925	0.497135	0.3518	-0.2291	-0.2633	-0.4218	0.3557	0.5245	-0.161	-0.7567	0.1717	0.00063427	0.0018327	0.00066363	0.0011875
114	0.57	0.01076	0.1603	0.009783	0.105321	0.931052	0.012186	0.03585	5.4768	8.9385	0.497245	0.3548	-0.22755	-0.2617	-0.4182	0.3579	0.5258	-0.1593	-0.7536	0.176	0.00063459	0.0018333	0.00066439	0.001189
115	0.575	0.01099	0.16041	0.0098	0.105418	0.931122	0.012235	0.03619	5.4827	8.9525	0.497345	0.358	-0.22605	-0.26015	-0.4144	0.3602	0.52695	-0.1576	-0.7504	0.1806	0.00063495	0.0018339	0.00066513	0.00119
116	0.58	0.01121	0.160515	0.009817	0.105514	0.931189	0.012284	0.03652	5.4885	8.9655	0.497455	0.3614	-0.2246	-0.25865	-0.4108	0.3624	0.52825	-0.15595	-0.7472	0.185	0.00063529	0.0018344	0.00066589	0.001191
117	0.585	0.01143	0.16062	0.009835	0.105607	0.931258	0.012332	0.03687	5.4945	8.9795	0.497565	0.3645	-0.2232	-0.2571	-0.4072	0.3648	0.5295	-0.15425	-0.7441	0.1893	0.00063563	0.001835	0.00066661	0.0011925
118	0.59	0.01165	0.16072	0.0098515	0.105702	0.931329	0.012382	0.03723	5.5005	8.9935	0.497675	0.3678	-0.22175	-0.25555	-0.4034	0.3671	0.5307	-0.1525	-0.7407	0.1936	0.00063597	0.0018356	0.00066744	0.001194
119	0.595	0.01187	0.16082	0.009869	0.105798	0.931398	0.012429	0.0376	5.5064	9.0075	0.497785	0.3712	-0.22025	-0.25385	-0.3995	0.3693	0.53195	-0.1508	-0.7373	0.1978	0.00063633	0.0018363	0.00066833	0.001195
120	0.6	0.01209	0.16093	0.009886	0.105894	0.931466	0.012477	0.03793	5.5124	9.0215	0.497895	0.3744	-0.21875	-0.2523	-0.3958	0.3714	0.53325	-0.14905	-0.7342	0.2019	0.00063672	0.0018369	0.00066914	0.001196
121	0.605	0.01232	0.161035	0.0099045	0.105988	0.931533	0.012526	0.03827	5.5178	9.036	0.497995	0.3779	-0.2174	-0.25075	-0.3924	0.3736	0.53455	-0.14725	-0.7309	0.2057	0.00063708	0.0018375	0.00066993	0.0011975
122	0.61	0.01253	0.16114	0.0099215	0.106087	0.931604	0.012575	0.03862	5.5239	9.05	0.498105	0.3812	-0.2159	-0.2492	-0.3888	0.3758	0.5359	-0.14535	-0.7278	0.2099	0.00063745	0.0018382	0.00067082	0.001199
123	0.615	0.01276	0.161245	0.0099395	0.106186	0.931671	0.012629	0.03895	5.5298	9.0635	0.498215	0.3846	-0.2143	-0.2477	-0.385	0.378	0.5372	-0.1435	-0.7246	0.2141	0.00063781	0.0018388	0.00067171	0.0012
124	0.62	0.01297	0.16135	0.0099565	0.106281	0.93174	0.012681	0.0393	5.5354	9.0785	0.49833	0.3879	-0.21285	-0.24605	-0.3813	0.3803	0.5385	-0.1416	-0.7213	0.2183	0.00063817	0.0018394	0.00067258	0.0012015
125	0.625	0.01319	0.16146	0.0099735	0.106378	0.931807	0.01273	0.03964	5.5416	9.0935	0.49844	0.3915	-0.21135	-0.2445	-0.3776	0.3825	0.53985	-0.1396	-0.718	0.2224	0.00063853	0.0018401	0.00067347	0.001203
126	0.63	0.01341	0.161565	0.009991	0.106475	0.931875	0.012782	0.04001	5.5476	9.109	0.498555	0.395	-0.2098	-0.2429	-0.3739	0.3846	0.5411	-0.1377	-0.7145	0.2264	0.00063891	0.0018407	0.00067437	0.0012045
127	0.635	0.01363	0.161675	0.0100095	0.106571	0.931944	0.012837	0.04037	5.5534	9.124	0.49867	0.3984	-0.20825	-0.24125	-0.3701	0.3867	0.54245	-0.1358	-0.711	0.2303	0.00063929	0.0018414	0.00067531	0.0012055
128	0.64	0.01385	0.16178	0.0100285	0.106672	0.932013	0.012889	0.04073	5.5595	9.139	0.498795	0.4022	-0.20665	-0.2396	-0.3666	0.3888	0.54375	-0.13385	-0.7074	0.2344	0.00063969	0.0018421	0.0006762	0.001207
129	0.645	0.01408	0.16189	0.010047	0.106774	0.932081	0.012942	0.0411	5.5661	9.155	0.49891	0.4056	-0.20515	-0.23785	-0.3631	0.3909	0.5451	-0.1319	-0.7038	0.2381	0.00064009	0.0018427	0.00067718	0.0012085
130	0.65	0.0143	0.162	0.0100645	0.106875	0.93215	0.012994	0.04149	5.5723	9.17	0.499025	0.4093	-0.20365	-0.23615	-0.3596	0.393	0.54645	-0.13	-0.7	0.242	0.00064051	0.0018434	0.00067817	0.00121
131	0.655	0.01452	0.162105	0.0100825	0.106977	0.932221	0.013051	0.04186	5.5788	9.1845	0.49915	0.4131	-0.20205	-0.23435	-0.3561	0.3951	0.5478	-0.12795	-0.6963	0.2459	0.00064092	0.0018441	0.00067908	0.0012115
132	0.66	0.01476	0.16221	0.0101	0.10708	0.932292	0.013105	0.04223	5.585	9.2	0.49927	0.4169	-0.20045	-0.2326	-0.3526	0.3973	0.54905	-0.12585	-0.692	0.2497	0.00064133	0.0018447	0.00068004	0.001213
133	0.665	0.01499	0.16232	0.010118	0.10718	0.932363	0.013159	0.04258	5.5916	9.2165	0.499385	0.4206	-0.1988	-0.23075	-0.349	0.3995	0.5505	-0.12375	-0.6881	0.2534	0.00064178	0.0018454	0.00068096	0.0012145
134	0.67	0.01523	0.162425	0.0101355	0.107285	0.932436	0.013211	0.04296	5.5987	9.232	0.499515	0.4247	-0.19715	-0.2289	-0.3453	0.4016	0.55185	-0.1217	-0.6841	0.2571	0.00064226	0.0018461	0.00068194	0.001216
135	0.675	0.01546	0.16254	0.0101545	0.107394	0.932509	0.013264	0.04332	5.6053	9.2485	0.499645	0.4286	-0.1955	-0.22705	-0.3418	0.4037	0.5532	-0.11955	-0.6801	0.2609	0.00064275	0.0018468	0.00068289	0.001218
136	0.68	0.0157	0.16265	0.010173	0.107494	0.932581	0.013322	0.04371	5.6124	9.264	0.499775	0.4326	-0.1938	-0.22515	-0.3382	0.4059	0.55455	-0.11725	-0.6762	0.2648	0.00064324	0.0018476	0.00068383	0.0012195
137	0.685	0.01592	0.16277	0.0101925	0.107599	0.932651	0.013376	0.04409	5.6191	9.281	0.499905	0.4367	-0.19225	-0.2233	-0.3347	0.4081	0.55595	-0.1149	-0.6721	0.2685	0.00064374	0.0018484	0.00068472	0.001221
138	0.69	0.01616	0.16288	0.010211	0.107701	0.932728	0.013435	0.04449	5.626	9.298	0.500025	0.4408	-0.19065	-0.2214	-0.331	0.4101	0.5573	-0.1123	-0.6679	0.2724	0.0006443	0.0018491	0.0006856	0.001223
139	0.695	0.01641	0.162995	0.010231	0.107806	0.932808	0.01349	0.04488	5.633	9.3135	0.50016	0.4454	-0.18895	-0.2194	-0.3274	0.4124	0.5587	-0.1099	-0.6637	0.2763	0.00064487	0.0018499	0.00068657	0.0012245
140	0.7	0.01665	0.163115	0.01025	0.107914	0.932882	0.01355	0.04525	5.6403	9.3305	0.500285	0.4498	-0.1873	-0.21755	-0.3236	0.4146	0.56005	-0.10725	-0.6596	0.2801	0.00064543	0.0018506	0.00068757	0.0012265
141	0.705	0.0169	0.16323	0.01027	0.108024	0.932958	0.013609	0.04565	5.6478	9.3475	0.500415	0.4541	-0.18555	-0.2156	-0.3202	0.4169	0.5615	-0.10465	-0.6555	0.2838	0.00064601	0.0018513	0.00068854	0.0012285
142	0.71	0.01714	0.163355	0.0102895	0.108135	0.933033	0.013669	0.04605	5.6548	9.365	0.50055	0.4585	-0.1838	-0.2136	-0.3164	0.4192	0.5629	-0.10205	-0.6512	0.2873	0.00064658	0.0018522	0.00068949	0.0012305
143	0.715	0.01739	0.16347	0.0103095	0.108244	0.933106	0.01373	0.04644	5.6618	9.3835	0.500695	0.463	-0.18205	-0.2116	-0.3127	0.4216	0.5644	-0.0994	-0.6468	0.291	0.00064718	0.001853	0.00069051	0.0012325
144	0.72	0.01765	0.163585	0.0103295	0.108365	0.933181	0.01379	0.04683	5.669	9.401	0.50082	0.4677	-0.1804	-0.2094	-0.3091	0.4238	0.5658	-0.0969	-0.6423	0.2946	0.00064778	0.0018537	0.00069155	0.001235
145	0.725	0.01793	0.163705	0.01035	0.108484	0.933258	0.01385	0.04724	5.6764	9.4185	0.500945	0.4726	-0.17865	-0.2073	-0.3057	0.4261	0.56735	-0.09445	-0.6378	0.2981	0.00064841	0.0018546	0.00069257	0.001237
146	0.73	0.01819	0.16382	0.0103695	0.108602	0.933333	0.013908	0.04764	5.6838	9.435	0.50108	0.4773	-0.17685	-0.20505	-0.3023	0.4285	0.5689	-0.09185	-0.633	0.3017	0.00064904	0.0018554	0.00069364	0.0012395
147	0.735	0.01846	0.16395	0.01039	0.108719	0.93341	0.013969	0.04801	5.6914	9.4535	0.50121	0.482	-0.17505	-0.20275	-0.2989	0.4307	0.57045	-0.08925	-0.6285	0.305	0.00064972	0.0018562	0.00069466	0.001242
148	0.74	0.01872	0.16407	0.01041	0.108835	0.933487	0.014029	0.04841	5.6994	9.4695	0.50134	0.4868	-0.1733	-0.20035	-0.2952	0.433	0.57195	-0.08645	-0.6236	0.3087	0.00065033	0.0018571	0.00069572	0.0012445
149	0.745	0.019	0.164195	0.01043	0.108957	0.933567	0.01409	0.04883	5.7071	9.4875	0.50149	0.4923	-0.1713	-0.1979	-0.2918	0.4353	0.57355	-0.08365	-0.619	0.3121	0.00065093	0.001858	0.00069683	0.001247
150	0.75	0.01926	0.16432	0.0104515	0.109074	0.933645	0.014153	0.04924	5.7147	9.504	0.50163	0.4972	-0.16935	-0.1953	-0.2882	0.4375	0.57515	-0.08085	-0.6142	0.3157	0.0006516	0.0018589	0.00069796	0.00125
151	0.755	0.01954	0.16445	0.0104735	0.109191	0.933729	0.014218	0.04966	5.7225	9.5235	0.50178	0.5021	-0.1674	-0.1927	-0.2843	0.4398	0.5768	-0.078	-0.6091	0.3194	0.00065226	0.0018598	0.00069911	0.001253
152	0.76	0.01981	0.16458	0.0104945	0.109309	0.93381	0.014281	0.05009	5.7308	9.5425	0.501925	0.5076	-0.16535	-0.1902	-0.2803	0.4422	0.5784	-0.07515	-0.6038	0.323	0.00065289	0.0018607	0.00070033	0.001256
153	0.765	0.02008	0.164705	0.010517	0.109436	0.933891	0.014348	0.05051	5.7396	9.5615	0.502065	0.5128	-0.1633	-0.1875	-0.2764	0.4446	0.58	-0.0721	-0.5989	0.3264	0.00065351	0.0018617	0.00070157	0.0012595
154	0.77	0.02039	0.16484	0.0105385	0.109561	0.933977	0.014412	0.05094	5.7486	9.5815	0.50221	0.5184	-0.1612	-0.18485	-0.2724	0.447	0.5816	-0.0687	-0.5933	0.3296	0.00065418	0.0018627	0.00070289	0.001263
155	0.775	0.02067	0.164975	0.010562	0.109684	0.934059	0.01448	0.05138	5.7572	9.6015	0.50236	0.5241	-0.15915	-0.182	-0.2683	0.4493	0.5832	-0.0654	-0.5876	0.3329	0.00065484	0.0018637	0.00070408	0.0012665
156	0.78	0.02096	0.16511	0.0105845	0.109808	0.934141	0.014548	0.05183	5.7662	9.6225	0.50252	0.5298	-0.1571	-0.17925	-0.2642	0.4516	0.58485	-0.062	-0.5816	0.3363	0.00065551	0.0018648	0.00070525	0.0012705
157	0.785	0.02125	0.16525	0.0106085	0.109952	0.93423	0.014617	0.05226	5.7752	9.6435	0.50268	0.5356	-0.1549	-0.17645	-0.2602	0.4541	0.5865	-0.0583	-0.5758	0.3399	0.00065614	0.0018659	0.00070642	0.0012745
158	0.79	0.02155	0.16539	0.0106335	0.110088	0.93432	0.014682	0.0527	5.7846	9.665	0.50283	0.5417	-0.15275	-0.17345	-0.2564	0.4565	0.5882	-0.05445	-0.5697	0.3433	0.00065676	0.0018671	0.00070763	0.001279
159	0.795	0.02183	0.165535	0.0106585	0.110218	0.934405	0.014754	0.05315	5.7942	9.6875	0.50299	0.5479	-0.15055	-0.17045	-0.2526	0.459	0.5899	-0.0504	-0.5636	0.3467	0.0006574	0.0018682	0.00070891	0.0012845
160	0.8	0.02214	0.16567	0.0106835	0.110353	0.934492	0.014824	0.0536	5.8037	9.708	0.503145	0.5542	-0.14845	-0.1675	-0.2486	0.4614	0.59155	-0.0463	-0.5575	0.3501	0.00065805	0.0018694	0.00071006	0.001289
161	0.805	0.02244	0.165805	0.010708	0.110495	0.934579	0.014897	0.05407	5.8134	9.7295	0.503305	0.5606	-0.1462	-0.1642	-0.2445	0.464	0.59335	-0.0418	-0.5511	0.3536	0.00065869	0.0018706	0.00071133	0.0012945
162	0.81	0.02276	0.16596	0.0107345	0.110649	0.934671	0.014969	0.05454	5.8228	9.751	0.503465	0.5674	-0.1439	-0.1606	-0.2405	0.4666	0.5952	-0.03735	-0.5446	0.3573	0.00065935	0.0018719	0.00071261	0.001301
163	0.815	0.0231	0.166105	0.0107615	0.110791	0.934769	0.015043	0.05504	5.8327	9.7725	0.50363	0.5741	-0.1416	-0.1572	-0.2367	0.4692	0.59705	-0.03235	-0.5381	0.3609	0.00066003	0.0018732	0.00071384	0.0013075
164	0.82	0.02341	0.166265	0.0107865	0.110937	0.934869	0.01512	0.05554	5.8426	9.7945	0.503805	0.5807	-0.13935	-0.1539	-0.2327	0.4719	0.59895	-0.02745	-0.5312	0.3646	0.0006607	0.0018746	0.00071512	0.0013155
165	0.825	0.02374	0.166415	0.010814	0.111084	0.934964	0.015199	0.05602	5.853	9.8175	0.50397	0.5877	-0.137	-0.15055	-0.2288	0.4745	0.601	-0.02265	-0.5241	0.3684	0.0006614	0.0018761	0.00071643	0.001324
166	0.83	0.02409	0.166565	0.0108415	0.111238	0.935063	0.015273	0.05653	5.8632	9.8405	0.504145	0.5952	-0.13465	-0.147	-0.2249	0.4772	0.60305	-0.01755	-0.5172	0.3721	0.00066206	0.0018776	0.00071769	0.0013325
167	0.835	0.02443	0.16672	0.0108705	0.111392	0.935162	0.015357	0.05703	5.8737	9.865	0.50432	0.6027	-0.13225	-0.14365	-0.2211	0.48	0.60515	-0.01185	-0.5102	0.376	0.00066278	0.0018793	0.00071892	0.001342
168	0.84	0.02481	0.166885	0.0109005	0.11155	0.935264	0.01544	0.05753	5.8857	9.891	0.5045	0.6105	-0.12975	-0.14005	-0.2173	0.483	0.60735	-0.0056	-0.5029	0.38	0.00066353	0.0018811	0.00072028	0.0013525
169	0.845	0.02516	0.167045	0.0109295	0.111713	0.935368	0.01552	0.05807	5.8972	9.9175	0.504675	0.6187	-0.1273	-0.13615	-0.2134	0.4858	0.60945	0.0008	-0.4962	0.384	0.00066426	0.0018829	0.00072156	0.001365
170	0.85	0.0255	0.167215	0.010958	0.11187	0.935478	0.015602	0.05859	5.9083	9.944	0.504865	0.6267	-0.12455	-0.13245	-0.2093	0.4887	0.6117	0.0077	-0.4889	0.3882	0.00066512	0.0018849	0.00072295	0.0013825
171	0.855	0.02585	0.167385	0.010988	0.112055	0.935585	0.015686	0.05913	5.92	9.9735	0.505045	0.6353	-0.12185	-0.1286	-0.205	0.4918	0.6139	0.01485	-0.4815	0.3925	0.00066599	0.0018871	0.00072435	0.0014065
172	0.86	0.02622	0.16755	0.0110185	0.112237	0.9357	0.015777	0.05973	5.9319	10.0015	0.50524	0.6434	-0.119	-0.1244	-0.201	0.4952	0.61635	0.0224	-0.4737	0.3964	0.00066689	0.0018894	0.00072594	0.001459
173	0.865	0.0266	0.167715	0.01105	0.112418	0.935818	0.015873	0.0603	5.9442	10.0305	0.505435	0.6524	-0.1162	-0.12015	-0.1969	0.4984	0.61875	0.0309	-0.466	0.4005	0.00066774	0.001892	0.00072744	0.002875
174	0.87	0.027	0.167895	0.01108	0.112597	0.935936	0.015975	0.0609	5.9573	10.059	0.505635	0.6623	-0.11325	-0.11575	-0.1928	0.5016	0.6213	0.04075	-0.4572	0.4048	0.00066859	0.0018947	0.00072896	0.002909
175	0.875	0.0274	0.168095	0.0111135	0.112795	0.936052	0.016072	0.06154	5.9703	10.0895	0.50585	0.6728	-0.1103	-0.1115	-0.1883	0.505	0.6239	0.0509	-0.4481	0.4089	0.00066947	0.0018979	0.00073033	0.0029255
176	0.88	0.02782	0.168285	0.011149	0.112995	0.936175	0.016172	0.06219	5.9836	10.123	0.506055	0.6837	-0.1072	-0.10675	-0.1839	0.5084	0.62665	0.0615	-0.4385	0.4132	0.00067038	0.0019016	0.00073178	0.002939
177	0.885	0.02824	0.16848	0.0111845	0.113202	0.936295	0.016282	0.06286	5.9977	10.1565	0.50627	0.6946	-0.104	-0.1018	-0.1793	0.5117	0.62945	0.0735	-0.4291	0.4176	0.00067137	0.0019063	0.00073337	0.00295
178	0.89	0.0287	0.16869	0.0112215	0.113416	0.936414	0.016388	0.06352	6.012	10.191	0.50649	0.7061	-0.1007	-0.09655	-0.1744	0.5154	0.63225	0.086	-0.4194	0.4221	0.00067238	0.0019122	0.000735	0.002959
179	0.895	0.02919	0.16892	0.0112605	0.113621	0.936543	0.016496	0.06424	6.0271	10.2285	0.50672	0.7176	-0.09725	-0.0913	-0.1696	0.5192	0.63505	0.1006	-0.4099	0.4266	0.00067343	0.0019206	0.00073666	0.0029675
180	0.9	0.02968	0.16915	0.0113	0.113832	0.936675	0.016607	0.06494	6.0441	10.267	0.506965	0.7302	-0.09355	-0.0862	-0.1643	0.5231	0.63805	0.11805	-0.4001	0.4315	0.00067452	0.001938	0.00073827	0.0029755
181	0.905	0.03018	0.16937	0.0113405	0.114072	0.93681	0.016728	0.06569	6.0616	10.307	0.507205	0.7426	-0.0899	-0.08045	-0.1591	0.5271	0.6414	0.14595	-0.3893	0.4362	0.00067566	0.0023992	0.00073984	0.0029825
182	0.91	0.03071	0.16962	0.011382	0.114309	0.936949	0.016855	0.06647	6.0791	10.351	0.507465	0.7564	-0.08575	-0.0749	-0.1537	0.5308	0.6445	0.17445	-0.3778	0.4412	0.00067675	0.0024256	0.00074159	0.002989
183	0.915	0.03125	0.16986	0.0114295	0.114558	0.937096	0.016975	0.06725	6.0978	10.394	0.50773	0.7709	-0.08175	-0.0698	-0.1478	0.5351	0.6479	0.20055	-0.3662	0.4463	0.00067793	0.0024433	0.00074332	0.0029955
184	0.92	0.03183	0.170125	0.0114775	0.11481	0.937249	0.017111	0.06812	6.1199	10.4405	0.508	0.7859	-0.0774	-0.0639	-0.1421	0.5397	0.6514	0.221	-0.3535	0.4513	0.00067916	0.0024588	0.0007452	0.0030015
185	0.925	0.03246	0.17039	0.0115275	0.115076	0.937409	0.017246	0.06903	6.1407	10.4905	0.508275	0.8022	-0.07245	-0.05795	-0.1361	0.5442	0.65525	0.2388	-0.3403	0.457	0.00068036	0.0024723	0.00074711	0.0030075
186	0.93	0.0331	0.170685	0.0115775	0.115371	0.937584	0.017403	0.06998	6.1621	10.539	0.50858	0.8197	-0.06745	-0.0514	-0.13	0.5496	0.6592	0.25405	-0.3272	0.4628	0.00068166	0.0024866	0.00074915	0.003013
187	0.935	0.03375	0.17099	0.0116325	0.115685	0.937759	0.017554	0.07101	6.1849	10.595	0.5089	0.8386	-0.0623	-0.0446	-0.1234	0.5547	0.66325	0.26655	-0.3113	0.4687	0.00068301	0.0025023	0.00075132	0.0030185
188	0.94	0.0345	0.171335	0.011692	0.116019	0.937941	0.017718	0.07215	6.2102	10.652	0.50924	0.8588	-0.05635	-0.03745	-0.1164	0.5597	0.66725	0.27725	-0.2959	0.4753	0.00068445	0.0025282	0.00075355	0.003024
189	0.945	0.03522	0.171685	0.011755	0.116359	0.938135	0.017887	0.07332	6.2394	10.716	0.509585	0.8807	-0.05055	-0.0297	-0.1088	0.5648	0.67175	0.2879	-0.2813	0.4825	0.00068595	0.0041384	0.00075598	0.00303
190	0.95	0.03602	0.17205	0.01182	0.116725	0.938351	0.018088	0.07463	6.2728	10.7915	0.50995	0.9055	-0.04365	-0.0221	-0.101	0.5706	0.67655	0.2982	-0.2652	0.4896	0.00068767	0.0041631	0.00075878	0.003035
191	0.955	0.03688	0.17245	0.011892	0.117153	0.93858	0.0183	0.07602	6.3083	10.868	0.51035	0.9321	-0.0367	-0.01395	-0.0926	0.5764	0.68165	0.30705	-0.2497	0.4972	0.00068953	0.0041776	0.00076162	0.003041
192	0.96	0.03776	0.172895	0.0119715	0.11758	0.938829	0.018527	0.0775	6.3473	10.9525	0.510785	0.9616	-0.02865	-0.00485	-0.084	0.5832	0.68715	0.3155	-0.2333	0.505	0.00069162	0.004189	0.00076451	0.0030475
193	0.965	0.03879	0.17336	0.012055	0.118083	0.9391	0.01878	0.07928	6.3907	11.053	0.511285	0.9974	-0.0188	0.00575	-0.075	0.5907	0.693	0.32375	-0.214	0.5135	0.00069382	0.0041988	0.00076762	0.003054
194	0.97	0.03988	0.173885	0.012151	0.118654	0.939421	0.019053	0.08119	6.4413	11.1645	0.51185	1.0395	-0.00855	0.017	-0.0641	0.599	0.70015	0.33285	-0.1932	0.5237	0.00069629	0.004207	0.00077109	0.003061
195	0.975	0.0412	0.174495	0.0122655	0.119322	0.939775	0.019405	0.08364	6.4972	11.2955	0.51246	1.0901	0.0025	0.02915	-0.0519	0.6091	0.7076	0.3436	-0.169	0.5349	0.00069918	0.0042152	0.00077463	0.003069
196	0.98	0.0427	0.175265	0.0124025	0.120198	0.940222	0.019787	0.08625	6.5661	11.4605	0.51314	1.1518	0.01825	0.04595	-0.0386	0.6196	0.71625	0.3552	-0.1397	0.5481	0.00070253	0.004224	0.00077886	0.003079
197	0.985	0.04457	0.176155	0.0125735	0.121196	0.940783	0.020264	0.08975	6.6387	11.6555	0.51402	1.2319	0.0386	0.06405	-0.0213	0.635	0.7295	0.36965	-0.1042	0.5646	0.00070653	0.0042326	0.00078392	0.003092
198	0.99	0.0473	0.177345	0.0128115	0.122471	0.941461	0.020922	0.0942	6.7382	11.9355	0.515145	1.3472	0.0665	0.08615	0.0019	0.6527	0.74665	0.3895	-0.0671	0.5845	0.00071204	0.0042436	0.00078958	0.0031115
199	0.995	0.05156	0.179285	0.013224	0.1246	0.942502	0.021948	0.10223	6.9139	12.389	0.517345	1.548	0.11205	0.11995	0.0375	0.6792	0.77235	0.4167	-0.0103	0.6144	0.00072259	0.0042598	0.00079904	0.003154
200	1	0	0	0	0	0	0	0	0	0	0	0	0	0	0	0	0	0	0	0	0	0	0	0
201	1.005	0	0	0	0	0	0	0	0	0	0	0	0	0	0	0	0	0	0	0	0	0	0	0
