# Supplementary material for: Time-varying asymmetry and tail thickness in long series of daily financial returns
Source: publisher site journal article supplement (doi:10.1515/snde-2017-0071), 2018-10-02
Supplement: Supplementary file 297 [file mq_add.xlsx]

## Sheet: 1
	quantile	(a1+a2)/2+b1	a0/[1-(a1+a2)/2-b1]	[a0/(1-(a1+a2)/2-b1)]^0.5	alpha1/alpha2	ni2/ni1	per_1	per_2	per_3	per_4
1	0.005	0.981669	0.5958	0.77185	4.795	1.0643	34.6425	5.876	31.328	7.935
2	0.01	0.982277	0.6095	0.7807	5.03	1.1068	35.1555	5.8985	31.703	8.044
3	0.015	0.982653	0.6185	0.78645	5.18	1.1361	35.4295	5.914	31.932	8.095
4	0.02	0.982933	0.6261	0.7913	5.3	1.1602	35.6315	5.926	32.139	8.13
5	0.025	0.983155	0.6321	0.79505	5.4	1.1787	35.8025	5.9385	32.315	8.156
6	0.03	0.983351	0.6369	0.7981	5.495	1.1954	35.951	5.95	32.463	8.177
7	0.035	0.983522	0.6415	0.8009	5.58	1.2087	36.079	5.9615	32.61	8.196
8	0.04	0.983674	0.6452	0.80325	5.65	1.2203	36.1935	5.9755	32.742	8.214
9	0.045	0.983806	0.6487	0.80545	5.73	1.232	36.3035	5.992	32.867	8.23
10	0.05	0.983923	0.6522	0.8076	5.8	1.2432	36.4015	6.0125	32.99	8.246
11	0.055	0.984036	0.6554	0.80955	5.855	1.2528	36.4925	6.0485	33.112	8.261
12	0.06	0.984142	0.6585	0.81145	5.915	1.2624	36.5725	9.901	33.219	8.276
13	0.065	0.984239	0.6615	0.81335	5.97	1.2711	36.65	10.0035	33.317	8.292
14	0.07	0.984341	0.6645	0.81515	6.02	1.2792	36.7225	10.0665	33.414	8.307
15	0.075	0.984433	0.6672	0.81685	6.07	1.2868	36.7925	10.125	33.505	8.322
16	0.08	0.984519	0.6698	0.8184	6.12	1.2943	36.8575	10.1805	33.591	8.338
17	0.085	0.984598	0.6723	0.81995	6.165	1.3012	36.9245	10.245	33.676	8.355
18	0.09	0.984676	0.6744	0.82125	6.21	1.3077	36.989	10.3195	33.755	8.373
19	0.095	0.984749	0.6767	0.82265	6.255	1.314	37.049	10.4335	33.834	8.392
20	0.1	0.984822	0.6789	0.824	6.3	1.3201	37.1115	12.916	33.906	8.412
21	0.105	0.984888	0.681	0.8252	6.34	1.3259	37.171	13.033	33.98	8.435
22	0.11	0.984954	0.6829	0.8264	6.385	1.3313	37.2295	13.0905	34.057	8.459
23	0.115	0.985013	0.6848	0.8275	6.425	1.3364	37.285	13.131	34.133	8.484
24	0.12	0.985074	0.6867	0.8287	6.465	1.3416	37.34	13.163	34.207	8.516
25	0.125	0.985137	0.6887	0.8299	6.505	1.3469	37.3915	13.1885	34.275	8.555
26	0.13	0.985195	0.6905	0.83095	6.545	1.3517	37.4405	13.211	34.34	8.605
27	0.135	0.985253	0.6922	0.83195	6.585	1.3563	37.488	13.23	34.411	8.706
28	0.14	0.98531	0.6938	0.83295	6.625	1.3609	37.5355	13.248	34.482	17.157
29	0.145	0.985365	0.6955	0.83395	6.66	1.3655	37.5865	13.2645	34.558	17.797
30	0.15	0.985419	0.6972	0.835	6.7	1.3703	37.636	13.28	34.625	18.103
31	0.155	0.985474	0.6988	0.83595	6.74	1.3749	37.6845	13.294	34.692	18.334
32	0.16	0.985528	0.7004	0.8369	6.775	1.3793	37.726	13.307	34.753	18.504
33	0.165	0.98558	0.7019	0.8378	6.81	1.3838	37.7685	13.3195	34.819	18.651
34	0.17	0.98563	0.7036	0.8388	6.845	1.3882	37.8095	13.3315	34.879	18.779
35	0.175	0.985678	0.7051	0.8397	6.885	1.3925	37.8475	13.3425	34.94	18.904
36	0.18	0.985724	0.7067	0.84065	6.92	1.3968	37.8875	13.353	35.004	19.028
37	0.185	0.98577	0.7082	0.84155	6.955	1.4011	37.926	13.363	35.067	19.138
38	0.19	0.985816	0.7096	0.8424	6.99	1.4055	37.965	13.3725	35.128	19.24
39	0.195	0.985858	0.7111	0.84325	7.025	1.4097	38.003	13.3815	35.191	19.332
40	0.2	0.985902	0.7125	0.8441	7.055	1.4138	38.04	13.3905	35.253	19.413
41	0.205	0.985947	0.7139	0.84495	7.09	1.4178	38.0775	13.3985	35.311	19.487
42	0.21	0.98599	0.7154	0.8458	7.125	1.4218	38.115	13.407	35.375	19.564
43	0.215	0.986031	0.7168	0.84665	7.155	1.4259	38.151	13.4155	35.435	19.636
44	0.22	0.986075	0.7183	0.8475	7.19	1.4298	38.1875	13.423	35.494	19.701
45	0.225	0.986117	0.7196	0.8483	7.225	1.4339	38.2265	13.431	35.553	19.763
46	0.23	0.986158	0.721	0.84915	7.255	1.4379	38.265	13.438	35.613	19.819
47	0.235	0.986198	0.7224	0.84995	7.29	1.4415	38.304	13.446	35.68	19.874
48	0.24	0.986237	0.7238	0.85075	7.32	1.4454	38.341	13.4525	35.743	19.924
49	0.245	0.986276	0.7251	0.85155	7.355	1.4493	38.378	13.4595	35.806	19.974
50	0.25	0.986316	0.7265	0.85235	7.385	1.4531	38.4165	13.466	35.865	20.02
51	0.255	0.986355	0.7278	0.85315	7.415	1.4569	38.4565	13.472	35.923	20.068
52	0.26	0.986393	0.7292	0.85395	7.45	1.4607	38.492	13.4785	35.98	20.112
53	0.265	0.98643	0.7306	0.85475	7.48	1.4645	38.5275	13.485	36.035	20.153
54	0.27	0.986466	0.732	0.85555	7.51	1.4682	38.568	13.491	36.088	20.192
55	0.275	0.986503	0.7333	0.8563	7.54	1.4719	38.606	13.497	36.144	20.231
56	0.28	0.986538	0.7346	0.85705	7.575	1.4755	38.643	13.503	36.197	20.268
57	0.285	0.986575	0.7358	0.8578	7.605	1.4793	38.679	13.509	36.252	20.303
58	0.29	0.986611	0.7371	0.85855	7.635	1.483	38.7145	13.5145	36.305	20.338
59	0.295	0.986647	0.7384	0.8593	7.67	1.4866	38.749	13.5205	36.355	20.372
60	0.3	0.986683	0.7397	0.8601	7.7	1.4901	38.784	13.526	36.406	20.404
61	0.305	0.98672	0.741	0.86085	7.735	1.4937	38.818	13.5315	36.459	20.435
62	0.31	0.986755	0.7424	0.8616	7.765	1.4973	38.852	13.5375	36.511	20.464
63	0.315	0.986792	0.7437	0.86235	7.8	1.5009	38.886	13.5425	36.558	20.494
64	0.32	0.986827	0.7449	0.8631	7.83	1.5045	38.9155	13.5485	36.606	20.523
65	0.325	0.986861	0.7463	0.86385	7.86	1.5082	38.9455	13.5535	36.656	20.551
66	0.33	0.986895	0.7475	0.8646	7.89	1.5117	38.975	13.559	36.707	20.578
67	0.335	0.986929	0.7488	0.86535	7.92	1.5151	39.004	13.564	36.76	20.605
68	0.34	0.986964	0.75	0.86605	7.95	1.5186	39.0315	13.569	36.81	20.631
69	0.345	0.986997	0.7513	0.8668	7.985	1.5221	39.057	13.574	36.862	20.657
70	0.35	0.987033	0.7526	0.86755	8.015	1.5257	39.082	13.579	36.911	20.683
71	0.355	0.987066	0.7539	0.8683	8.045	1.5291	39.1075	13.584	36.965	20.709
72	0.36	0.987099	0.7552	0.86905	8.08	1.5325	39.1315	13.589	37.019	20.733
73	0.365	0.98713	0.7566	0.8698	8.11	1.5359	39.1565	13.594	37.068	20.757
74	0.37	0.987164	0.7579	0.87055	8.14	1.5394	39.18	13.599	37.119	20.781
75	0.375	0.987198	0.7591	0.8713	8.17	1.5428	39.2025	13.6035	37.169	20.805
76	0.38	0.98723	0.7604	0.872	8.205	1.546	39.2255	13.6085	37.218	20.829
77	0.385	0.987262	0.7617	0.87275	8.235	1.5493	39.247	13.613	37.266	20.852
78	0.39	0.987293	0.763	0.87345	8.27	1.5527	39.2695	13.6175	37.315	20.875
79	0.395	0.987323	0.7643	0.87425	8.305	1.5561	39.292	13.6225	37.365	20.899
80	0.4	0.987356	0.7656	0.87495	8.335	1.5595	39.3145	13.627	37.409	20.921
81	0.405	0.987386	0.7668	0.8757	8.365	1.5629	39.338	13.6315	37.455	20.943
82	0.41	0.987418	0.7681	0.8764	8.4	1.5663	39.3605	13.6365	37.504	20.965
83	0.415	0.987448	0.7694	0.87715	8.43	1.5697	39.3815	13.641	37.551	20.987
84	0.42	0.987479	0.7706	0.87785	8.465	1.5733	39.4025	13.6455	37.592	21.009
85	0.425	0.987507	0.772	0.8786	8.5	1.5767	39.424	13.6495	37.635	21.031
86	0.43	0.987539	0.7733	0.87935	8.535	1.5802	39.4465	13.654	37.677	21.053
87	0.435	0.98757	0.7745	0.8801	8.57	1.5836	39.466	13.6585	37.72	21.075
88	0.44	0.987602	0.7758	0.8808	8.6	1.5871	39.486	13.663	37.761	21.098
89	0.445	0.987632	0.7772	0.88155	8.635	1.5904	39.5085	13.6675	37.802	21.12
90	0.45	0.987661	0.7785	0.88235	8.67	1.5938	39.5315	13.672	37.842	21.141
91	0.455	0.987691	0.7799	0.8831	8.7	1.597	39.555	13.6765	37.879	21.162
92	0.46	0.987722	0.7812	0.8839	8.735	1.6002	39.5785	13.6805	37.919	21.183
93	0.465	0.987752	0.7826	0.88465	8.77	1.6035	39.603	13.6855	37.957	21.203
94	0.47	0.987783	0.7839	0.8854	8.8	1.6067	39.6265	13.6895	37.995	21.223
95	0.475	0.987812	0.7853	0.88615	8.835	1.61	39.6475	13.694	38.03	21.245
96	0.48	0.987842	0.7866	0.8869	8.87	1.6136	39.669	13.6985	38.065	21.265
97	0.485	0.987874	0.788	0.88765	8.905	1.617	39.6895	13.7025	38.1	21.286
98	0.49	0.987903	0.7893	0.88845	8.94	1.6204	39.711	13.707	38.133	21.307
99	0.495	0.987934	0.7907	0.8892	8.975	1.6237	39.7335	13.711	38.166	21.328
100	0.5	0.987964	0.792	0.88995	9.01	1.6268	39.755	13.715	38.2	21.349
101	0.505	0.987994	0.7934	0.8907	9.05	1.63	39.776	13.7195	38.234	21.368
102	0.51	0.988024	0.7947	0.89145	9.085	1.6331	39.7975	13.724	38.268	21.389
103	0.515	0.988052	0.796	0.8922	9.12	1.6364	39.8195	13.728	38.302	21.408
104	0.52	0.988081	0.7974	0.893	9.155	1.6397	39.8405	13.732	38.334	21.429
105	0.525	0.988112	0.7988	0.89375	9.195	1.6428	39.8635	13.737	38.364	21.45
106	0.53	0.988142	0.8002	0.89455	9.235	1.6461	39.886	13.741	38.395	21.471
107	0.535	0.988174	0.8016	0.89535	9.27	1.6493	39.907	13.7455	38.425	21.491
108	0.54	0.988203	0.803	0.8961	9.31	1.6526	39.927	13.75	38.455	21.51
109	0.545	0.988232	0.8043	0.8968	9.345	1.6559	39.9475	13.754	38.485	21.53
110	0.55	0.988261	0.8057	0.8976	9.385	1.6593	39.9675	13.7585	38.512	21.55
111	0.555	0.988291	0.8071	0.8984	9.425	1.6627	39.9855	13.7625	38.538	21.57
112	0.56	0.988321	0.8085	0.8992	9.465	1.666	40.0035	13.7675	38.567	21.591
113	0.565	0.988348	0.81	0.9	9.505	1.6695	40.0215	13.7715	38.598	21.611
114	0.57	0.988376	0.8114	0.9008	9.545	1.6729	40.0385	13.7755	38.628	21.63
115	0.575	0.988404	0.8129	0.90165	9.585	1.6763	40.055	13.7805	38.656	21.652
116	0.58	0.988431	0.8144	0.90245	9.625	1.6797	40.0725	13.7845	38.685	21.671
117	0.585	0.988461	0.8158	0.90325	9.67	1.683	40.0895	13.789	38.714	21.691
118	0.59	0.98849	0.8172	0.904	9.715	1.6864	40.1075	13.793	38.743	21.712
119	0.595	0.988518	0.8187	0.90485	9.76	1.6898	40.125	13.7975	38.771	21.732
120	0.6	0.988546	0.8202	0.90565	9.8	1.6931	40.142	13.802	38.801	21.752
121	0.605	0.988574	0.8216	0.90645	9.845	1.6966	40.1595	13.8065	38.832	21.774
122	0.61	0.988605	0.8231	0.90725	9.89	1.7	40.178	13.811	38.863	21.796
123	0.615	0.988635	0.8246	0.9081	9.935	1.7035	40.1945	13.8155	38.894	21.816
124	0.62	0.988667	0.8262	0.90895	9.98	1.7069	40.2115	13.82	38.927	21.836
125	0.625	0.988697	0.8277	0.9098	10.03	1.7104	40.2305	13.8245	38.959	21.857
126	0.63	0.988729	0.8293	0.91065	10.075	1.7139	40.25	13.829	38.991	21.879
127	0.635	0.988759	0.8309	0.9115	10.125	1.7174	40.267	13.8335	39.021	21.901
128	0.64	0.98879	0.8325	0.9124	10.175	1.7211	40.285	13.838	39.051	21.925
129	0.645	0.988821	0.8341	0.9133	10.225	1.7246	40.301	13.843	39.08	21.947
130	0.65	0.988852	0.8358	0.9142	10.275	1.7284	40.3195	13.8475	39.108	21.969
131	0.655	0.988884	0.8374	0.9151	10.325	1.7321	40.338	13.852	39.139	21.989
132	0.66	0.988916	0.8391	0.91605	10.38	1.7357	40.356	13.8565	39.168	22.013
133	0.665	0.988949	0.8409	0.917	10.43	1.7396	40.3745	13.8615	39.198	22.035
134	0.67	0.988982	0.8426	0.91795	10.485	1.7434	40.3915	13.866	39.229	22.056
135	0.675	0.989015	0.8443	0.9189	10.54	1.7471	40.4075	13.8705	39.262	22.077
136	0.68	0.989049	0.8462	0.9199	10.595	1.751	40.423	13.8755	39.292	22.1
137	0.685	0.989082	0.848	0.92085	10.655	1.755	40.4385	13.8805	39.321	22.124
138	0.69	0.989116	0.8497	0.9218	10.71	1.7588	40.454	13.8855	39.351	22.149
139	0.695	0.989148	0.8515	0.9228	10.77	1.7627	40.472	13.8905	39.383	22.172
140	0.7	0.989181	0.8534	0.9238	10.825	1.7668	40.4885	13.8955	39.414	22.195
141	0.705	0.989216	0.8552	0.9248	10.885	1.7709	40.505	13.9005	39.447	22.221
142	0.71	0.989251	0.8571	0.9258	10.945	1.7747	40.522	13.9055	39.479	22.244
143	0.715	0.989286	0.859	0.9268	11.01	1.7789	40.54	13.9105	39.509	22.269
144	0.72	0.989321	0.8608	0.9278	11.07	1.783	40.557	13.9155	39.54	22.293
145	0.725	0.989356	0.8628	0.92885	11.14	1.7874	40.573	13.9205	39.568	22.319
146	0.73	0.989393	0.8648	0.92995	11.21	1.7918	40.589	13.926	39.6	22.345
147	0.735	0.989427	0.8668	0.93105	11.28	1.7963	40.6055	13.9315	39.63	22.371
148	0.74	0.989464	0.869	0.9322	11.35	1.8006	40.62	13.937	39.658	22.397
149	0.745	0.9895	0.871	0.9333	11.42	1.8051	40.6345	13.942	39.686	22.423
150	0.75	0.989536	0.8732	0.93445	11.495	1.8096	40.65	13.9475	39.716	22.45
151	0.755	0.989573	0.8754	0.93565	11.57	1.814	40.6665	13.953	39.747	22.478
152	0.76	0.989611	0.8777	0.93685	11.65	1.819	40.6845	13.9585	39.778	22.504
153	0.765	0.98965	0.8798	0.938	11.725	1.8235	40.7025	13.9645	39.808	22.531
154	0.77	0.989689	0.8819	0.9391	11.81	1.8283	40.7185	13.9705	39.84	22.558
155	0.775	0.989728	0.8842	0.94035	11.895	1.8331	40.7335	13.9765	39.871	22.586
156	0.78	0.989769	0.8867	0.94165	11.98	1.8381	40.7495	13.9825	39.901	22.614
157	0.785	0.989808	0.8891	0.9429	12.07	1.843	40.7645	13.9885	39.931	22.642
158	0.79	0.989848	0.8916	0.94425	12.155	1.848	40.779	13.9945	39.96	22.67
159	0.795	0.98989	0.8941	0.9456	12.25	1.8533	40.797	14.001	39.992	22.698
160	0.8	0.989932	0.8967	0.94695	12.345	1.8586	40.813	14.007	40.022	22.726
161	0.805	0.989976	0.8993	0.94835	12.445	1.8643	40.8285	14.0135	40.051	22.757
162	0.81	0.990017	0.9022	0.94985	12.55	1.8698	40.845	14.02	40.082	22.788
163	0.815	0.990061	0.9051	0.95135	12.65	1.8754	40.862	14.027	40.112	22.819
164	0.82	0.990103	0.9079	0.95285	12.76	1.8813	40.879	14.034	40.142	22.85
165	0.825	0.990151	0.9108	0.9544	12.875	1.8873	40.8955	14.041	40.173	22.882
166	0.83	0.9902	0.9138	0.9559	12.995	1.8933	40.9135	14.0475	40.204	22.914
167	0.835	0.990247	0.917	0.9576	13.12	1.8994	40.932	14.055	40.235	22.945
168	0.84	0.990294	0.9201	0.95925	13.25	1.906	40.9515	14.062	40.264	22.979
169	0.845	0.99034	0.9236	0.96105	13.38	1.9127	40.9725	14.069	40.293	23.014
170	0.85	0.990389	0.9271	0.9629	13.52	1.9195	40.9925	14.0765	40.322	23.048
171	0.855	0.990437	0.9305	0.96465	13.655	1.9264	41.0155	14.0845	40.351	23.085
172	0.86	0.99049	0.9343	0.96655	13.81	1.9336	41.04	14.092	40.382	23.123
173	0.865	0.990546	0.9378	0.96845	13.965	1.941	41.062	14.1005	40.414	23.164
174	0.87	0.990601	0.9417	0.9704	14.12	1.9482	41.082	14.109	40.445	23.204
175	0.875	0.990661	0.9458	0.97255	14.295	1.9564	41.1005	14.1185	40.475	23.245
176	0.88	0.990719	0.9499	0.9746	14.48	1.9642	41.119	14.1275	40.505	23.288
177	0.885	0.990779	0.9542	0.97685	14.665	1.9722	41.1365	14.137	40.534	23.331
178	0.89	0.990839	0.9585	0.97905	14.855	1.981	41.1575	14.1465	40.566	23.375
179	0.895	0.990902	0.9631	0.9814	15.075	1.9894	41.1805	14.1555	40.598	23.424
180	0.9	0.990967	0.9681	0.9839	15.31	1.9977	41.2005	14.166	40.628	23.473
181	0.905	0.991036	0.9734	0.9866	15.55	2.0074	41.22	14.1765	40.661	23.528
182	0.91	0.991109	0.979	0.98945	15.8	2.0178	41.24	14.187	40.693	23.582
183	0.915	0.991178	0.985	0.9925	16.055	2.0282	41.258	14.199	40.722	23.64
184	0.92	0.991254	0.9914	0.9957	16.35	2.0394	41.2715	14.212	40.753	23.698
185	0.925	0.991334	0.9978	0.9989	16.655	2.0512	41.2865	14.2255	40.782	23.763
186	0.93	0.991415	1.0057	1.00285	16.995	2.064	41.302	14.24	40.813	23.831
187	0.935	0.991501	1.0134	1.0067	17.365	2.0771	41.3155	14.2555	40.845	23.908
188	0.94	0.991592	1.022	1.01095	17.76	2.092	41.326	14.271	40.874	23.985
189	0.945	0.991686	1.0317	1.01575	18.225	2.1066	41.336	14.2885	40.906	24.078
190	0.95	0.991791	1.0422	1.02085	18.72	2.1221	41.348	14.307	40.939	24.18
191	0.955	0.991901	1.0534	1.02635	19.33	2.1403	41.3635	14.3265	40.972	24.278
192	0.96	0.992022	1.0649	1.0319	20.05	2.1598	41.378	14.348	41.006	24.397
193	0.965	0.992158	1.0789	1.0387	20.875	2.1812	41.393	14.3725	41.047	24.533
194	0.97	0.99232	1.0944	1.04615	21.81	2.2059	41.408	14.3995	41.089	24.698
195	0.975	0.992505	1.1136	1.05525	22.955	2.2405	41.4285	14.4325	41.141	24.896
196	0.98	0.992725	1.1401	1.06775	24.375	2.2813	41.4445	14.4705	41.188	25.139
197	0.985	0.992995	1.1737	1.0834	26.445	2.3334	41.4555	14.5215	41.245	25.47
198	0.99	0.993347	1.2205	1.10475	29.565	2.3989	41.4675	14.589	41.298	25.898
199	0.995	0.993906	1.3002	1.14025	35.29	2.5155	41.4835	14.6905	41.392	26.627
200	1	0	0	0	0	0	0	0	0	0
201	1.005	0	0	0	0	0	0	0	0	0
