# Supplementary material for: Time-varying asymmetry and tail thickness in long series of daily financial returns
Source: publisher site journal article supplement (doi:10.1515/snde-2017-0071), 2018-10-02
Supplement: Supplementary file 299 [file point_est.xlsx]

## Sheet: 1
	log post kernel	delta	rho	alpha0	alpha1-	beta1	alpha1+	lambda1	ni1	ni2	a00	h0	gamma_s0	gamma_s1	gamma_s2	gamma_s3	gamma_c0	gamma_c1	gamma_c2	gamma_c3	phi0	phi1	phi2	phi3	Var25
1	-16524.9	0.00524655	0.320123	-4.59779	-2.14827	2.57013	-4.4166	0.035279	1.20427	1.87984	-0.0124139	-1.00776	-0.268246	-0.329018	-0.502067	0.455065	0.502942	-0.156594	-0.797105	0.0415094	-6.62088	-2.96553	-5.97213	-3.8558	0.00524655
2	-16537.3	0.008949	0.318163	-4.65109	-2.17021	2.61033	-4.5127	0.0292297	1.21028	1.91396	-0.0153931	-1.57885	-0.350426	-0.378064	-0.217361	0.43295	0.520371	-0.141458	-1.04067	0.34964	-18.02	-2.93892	-7.96773	-3.87237	0.008949
3	-16548.7	0.0077014	0.320565	-4.65522	-2.15385	2.58945	-4.50391	0.0314474	1.22217	1.91142	-0.0129395	-1.19842	-0.239347	-0.264624	-0.478653	0.247723	0.513173	-0.141798	-0.749194	0.0843456	-6.99752	-2.88805	-6.23928	-3.64799	0.0077014
