# Supplementary material for: Time-varying asymmetry and tail thickness in long series of daily financial returns
Source: publisher site journal article supplement (doi:10.1515/snde-2017-0071), 2018-10-02
Supplement: Supplementary file 301 [file post_es.xlsx]

## Sheet: 1
	delta	rho	alpha0	alpha1-	beta1	alpha1+	lambda1	ni1	ni2	a00	h0	gamma_s0	gamma_s1	gamma_s2	gamma_s3	gamma_c0	gamma_c1	gamma_c2	gamma_c3	phi0	phi1	phi2	phi3	(a1+a2)/2+b1	a0/[1-(a1+a2)/2-b1]
1	0.0077014	0.158914	0.00960065	0.104205	0.929998	0.0116338	0.0314474	5.42829	8.84842	0.495884	0.382937	-0.239347	-0.264624	-0.478653	0.247723	0.513173	-0.141798	-0.749194	0.0843456	0.000636244	0.00198215	0.000667667	0.00142636	0.987917	0.812432
2	0.0171736	0.00795421	0.00130451	0.00741515	0.00524399	0.00380563	0.0263513	0.478754	1.0956	0.00844688	0.275248	0.112749	0.126176	0.244655	0.266344	0.0943098	0.1805	0.244503	0.279284	2.64505e-05	0.000565757	4.65664e-05	0.000712006	0.00238978	0.125882
