# Supplementary material for: Time-varying asymmetry and tail thickness in long series of daily financial returns
Source: publisher site journal article supplement (doi:10.1515/snde-2017-0071), 2018-10-02
Supplement: Supplementary file 311 [file r_1.xlsx]

## Sheet: 1
	Var1	Var2	Var3	Var4	Var5	Var6	Var7	Var8	Var9	Var10	Var11	Var12	Var13	Var14	Var15	Var16	Var17	Var18	Var19	Var20	Var21	Var22	Var23	Var24	Var25
1	0	0.0422108	0.0483969	0.0401003	0.15873	0.0477384	0.0308463	0.0417711	0.075188	0.0381907	0.0481203	0.0501253	0.902256	0.0334169	0.0694043	0.0334169	0.0716076	0.030379	0.0342963	0.0350877	0.029105	0.0110166	0.0175439	0.0216758	0.00733541
2	0	0.126265	0.126505	0.12675	0.12691	0.127075	0.12731	0.12756	0.12774	0.127905	0.128135	0.12834	0.128425	0.12855	0.128735	0.12892	0.12911	0.129345	0.1297	0.12999	0.130245	0.130855	0.13151	0.131895	0.13249
3	0	8	14	8	19	10	8	10	9	8	12	8	9	8	9	8	10	10	13	7	9	10	7	8	6
4	0.12617	0.12636	0.12665	0.12685	0.12697	0.12718	0.12744	0.12768	0.1278	0.12801	0.12826	0.12842	0.12843	0.12867	0.1288	0.12904	0.12918	0.12951	0.12989	0.13009	0.1304	0.13131	0.13171	0.13208	0.1329
