# Supplementary material for: Time-varying asymmetry and tail thickness in long series of daily financial returns
Source: publisher site journal article supplement (doi:10.1515/snde-2017-0071), 2018-10-02
Supplement: Supplementary file 315 [file thres_inm.xlsx]

## Sheet: 1
	Var1	Var2	Var3	Var4	Var5	Var6	Var7	Var8	Var9	Var10	Var11	Var12	Var13	Var14	Var15	Var16	Var17	Var18	Var19	Var20	Var21	Var22	Var23	Var24	Var25
1	0	0	0	0	0	0	0	0	0	0	0	0	0	0	0	0	0	0	0	0	0	0	0	0	0
2	0.05	-0.01419	0.1	-0.00276	0.125	0.00144	0.2	0.0111	0.25	0.01652	0.5	0.03753	0.75	0.05868	0.8	0.06385	0.875	0.07342	0.9	0.07759	0.95	0.08932	111	0.0365	13.0061
3	0.05	-0.01371	0.1	-0.00266	0.125	0.00139	0.2	0.01073	0.25	0.01597	0.5	0.03634	0.75	0.0569	0.8	0.06192	0.875	0.07123	0.9	0.07525	0.95	0.08671	111	0.03511	13.3727
4	0.05	-0.01323	0.1	-0.00257	0.125	0.00134	0.2	0.0104	0.25	0.01546	0.5	0.03524	0.75	0.05526	0.8	0.06012	0.875	0.06916	0.9	0.07307	0.95	0.08425	111	0.03373	13.686
5	0.05	-0.01279	0.1	-0.00249	0.125	0.0013	0.2	0.01009	0.25	0.015	0.5	0.03425	0.75	0.05379	0.8	0.05853	0.875	0.06729	0.9	0.07116	0.95	0.08202	111	0.03279	13.9947
6	0.05	-0.01241	0.1	-0.00242	0.125	0.00127	0.2	0.00982	0.25	0.01461	0.5	0.0334	0.75	0.05254	0.8	0.05715	0.875	0.06574	0.9	0.06946	0.95	0.08006	111	0.03216	14.3012
7	0.05	-0.01208	0.1	-0.00235	0.125	0.00123	0.2	0.0096	0.25	0.01428	0.5	0.03271	0.75	0.05153	0.8	0.05608	0.875	0.06453	0.9	0.06818	0.95	0.07861	111	0.03159	14.5778
8	0.05	-0.01184	0.1	-0.0023	0.125	0.00121	0.2	0.00943	0.25	0.01403	0.5	0.03219	0.75	0.05078	0.8	0.05531	0.875	0.06368	0.9	0.06727	0.95	0.07752	111	0.03102	14.782
9	0.05	-0.01168	0.1	-0.00228	0.125	0.00119	0.2	0.00932	0.25	0.01385	0.5	0.03185	0.75	0.05032	0.8	0.05484	0.875	0.06319	0.9	0.06674	0.95	0.07695	111	0.03049	14.9017
10	0.05	-0.01161	0.1	-0.00226	0.125	0.00118	0.2	0.00928	0.25	0.01374	0.5	0.0317	0.75	0.05012	0.8	0.0547	0.875	0.06305	0.9	0.06662	0.95	0.0768	111	0.03021	14.9292
11	0.05	-0.0116	0.1	-0.00226	0.125	0.00118	0.2	0.00929	0.25	0.01376	0.5	0.03174	0.75	0.05022	0.8	0.05484	0.875	0.06324	0.9	0.06686	0.95	0.07706	111	0.03001	14.8779
12	0.05	-0.01167	0.1	-0.00228	0.125	0.00119	0.2	0.00934	0.25	0.01384	0.5	0.03192	0.75	0.05058	0.8	0.05522	0.875	0.06372	0.9	0.06735	0.95	0.0776	111	0.02986	14.7565
13	0.05	-0.01179	0.1	-0.00231	0.125	0.00121	0.2	0.00943	0.25	0.01397	0.5	0.03224	0.75	0.05111	0.8	0.0558	0.875	0.0644	0.9	0.06811	0.95	0.07848	111	0.0299	14.5894
14	0.05	-0.01194	0.1	-0.00234	0.125	0.00122	0.2	0.00954	0.25	0.01413	0.5	0.03263	0.75	0.05181	0.8	0.05652	0.875	0.06522	0.9	0.06901	0.95	0.07958	111	0.02992	14.4013
15	0.05	-0.01209	0.1	-0.00238	0.125	0.00123	0.2	0.00967	0.25	0.01432	0.5	0.03308	0.75	0.05255	0.8	0.05732	0.875	0.06615	0.9	0.06996	0.95	0.08067	111	0.03022	14.1997
16	0.05	-0.01225	0.1	-0.00241	0.125	0.00125	0.2	0.00982	0.25	0.01453	0.5	0.03354	0.75	0.05327	0.8	0.05809	0.875	0.06703	0.9	0.0709	0.95	0.08172	111	0.03063	14.0059
17	0.05	-0.01241	0.1	-0.00244	0.125	0.00126	0.2	0.00995	0.25	0.01472	0.5	0.03397	0.75	0.05391	0.8	0.0588	0.875	0.06781	0.9	0.07175	0.95	0.08257	111	0.03095	13.8428
18	0.05	-0.01256	0.1	-0.00246	0.125	0.00128	0.2	0.01005	0.25	0.01489	0.5	0.03431	0.75	0.05445	0.8	0.05936	0.875	0.06841	0.9	0.07245	0.95	0.08318	111	0.03102	13.7261
19	0.05	-0.01265	0.1	-0.00247	0.125	0.00129	0.2	0.01012	0.25	0.01501	0.5	0.03457	0.75	0.0548	0.8	0.05974	0.875	0.06889	0.9	0.07292	0.95	0.08364	111	0.03175	13.6545
20	0.05	-0.01271	0.1	-0.00246	0.125	0.00129	0.2	0.01017	0.25	0.01506	0.5	0.03466	0.75	0.05496	0.8	0.05996	0.875	0.06915	0.9	0.07309	0.95	0.08393	111	0.03247	13.6271
21	0.05	-0.01269	0.1	-0.00246	0.125	0.00129	0.2	0.01015	0.25	0.01505	0.5	0.03459	0.75	0.05497	0.8	0.06001	0.875	0.06917	0.9	0.07308	0.95	0.08393	111	0.03212	13.6579
22	0.05	-0.01264	0.1	-0.00244	0.125	0.00129	0.2	0.01009	0.25	0.01495	0.5	0.03443	0.75	0.0548	0.8	0.05981	0.875	0.06901	0.9	0.07284	0.95	0.0837	111	0.03164	13.7064
23	0.05	-0.01255	0.1	-0.00241	0.125	0.00127	0.2	0.01	0.25	0.01483	0.5	0.03413	0.75	0.0544	0.8	0.05936	0.875	0.06855	0.9	0.07229	0.95	0.08309	111	0.03127	13.7911
24	0.05	-0.0124	0.1	-0.00239	0.125	0.00126	0.2	0.00987	0.25	0.01467	0.5	0.03373	0.75	0.05376	0.8	0.05869	0.875	0.06773	0.9	0.07143	0.95	0.08219	111	0.03117	13.9389
25	0.05	-0.01221	0.1	-0.00236	0.125	0.00124	0.2	0.00973	0.25	0.01445	0.5	0.03322	0.75	0.0529	0.8	0.05775	0.875	0.06658	0.9	0.07025	0.95	0.0809	111	0.03108	14.1809
26	0.05	-0.01203	0.1	-0.00232	0.125	0.00122	0.2	0.00955	0.25	0.01418	0.5	0.03259	0.75	0.05183	0.8	0.05654	0.875	0.06518	0.9	0.06875	0.95	0.07924	111	0.03092	14.5363
27	0.05	-0.01178	0.1	-0.00227	0.125	0.0012	0.2	0.00934	0.25	0.01388	0.5	0.03187	0.75	0.05056	0.8	0.05515	0.875	0.06347	0.9	0.06699	0.95	0.07724	111	0.03069	14.9681
28	0.05	-0.01145	0.1	-0.00223	0.125	0.00117	0.2	0.00912	0.25	0.01353	0.5	0.03103	0.75	0.04911	0.8	0.05359	0.875	0.06159	0.9	0.06498	0.95	0.07494	111	0.03024	15.4808
29	0.05	-0.0111	0.1	-0.00217	0.125	0.00113	0.2	0.00884	0.25	0.01313	0.5	0.0301	0.75	0.04755	0.8	0.05187	0.875	0.0596	0.9	0.06287	0.95	0.07255	111	0.02957	16.0341
30	0.05	-0.01072	0.1	-0.0021	0.125	0.0011	0.2	0.00853	0.25	0.01268	0.5	0.02907	0.75	0.04587	0.8	0.05003	0.875	0.0575	0.9	0.06067	0.95	0.07002	111	0.02862	16.605
31	0.05	-0.0103	0.1	-0.00202	0.125	0.00106	0.2	0.0082	0.25	0.01218	0.5	0.02795	0.75	0.04412	0.8	0.04812	0.875	0.05529	0.9	0.05838	0.95	0.06742	111	0.02748	17.2613
32	0.05	-0.00986	0.1	-0.00194	0.125	0.00101	0.2	0.00785	0.25	0.01167	0.5	0.02679	0.75	0.04233	0.8	0.04616	0.875	0.05307	0.9	0.05604	0.95	0.06479	111	0.0263	18.0011
33	0.05	-0.00942	0.1	-0.00185	0.125	0.00097	0.2	0.0075	0.25	0.01116	0.5	0.02564	0.75	0.04054	0.8	0.04421	0.875	0.05083	0.9	0.05371	0.95	0.06213	111	0.02519	18.7933
34	0.05	-0.009	0.1	-0.00177	0.125	0.00092	0.2	0.00717	0.25	0.01065	0.5	0.02454	0.75	0.03878	0.8	0.04231	0.875	0.04869	0.9	0.05147	0.95	0.05951	111	0.02419	19.624
35	0.05	-0.0086	0.1	-0.00168	0.125	0.00088	0.2	0.00685	0.25	0.01019	0.5	0.0235	0.75	0.03716	0.8	0.04055	0.875	0.04668	0.9	0.04937	0.95	0.05706	111	0.02324	20.4295
36	0.05	-0.00823	0.1	-0.00161	0.125	0.00084	0.2	0.00656	0.25	0.00976	0.5	0.02257	0.75	0.03569	0.8	0.03897	0.875	0.04487	0.9	0.04749	0.95	0.05487	111	0.02255	21.2693
37	0.05	-0.00791	0.1	-0.00154	0.125	0.00081	0.2	0.00631	0.25	0.00939	0.5	0.02175	0.75	0.03444	0.8	0.0376	0.875	0.04336	0.9	0.04584	0.95	0.05301	111	0.02197	22.0763
38	0.05	-0.00765	0.1	-0.00149	0.125	0.00078	0.2	0.0061	0.25	0.00908	0.5	0.02109	0.75	0.03341	0.8	0.03649	0.875	0.04209	0.9	0.04449	0.95	0.0515	111	0.02149	22.76
39	0.05	-0.00745	0.1	-0.00145	0.125	0.00076	0.2	0.00595	0.25	0.00886	0.5	0.02058	0.75	0.03263	0.8	0.03564	0.875	0.0411	0.9	0.04349	0.95	0.05034	111	0.02083	23.1476
40	0.05	-0.0073	0.1	-0.00142	0.125	0.00074	0.2	0.00584	0.25	0.00871	0.5	0.02022	0.75	0.0321	0.8	0.03508	0.875	0.04047	0.9	0.04282	0.95	0.04956	111	0.01998	23.3338
41	0.05	-0.00722	0.1	-0.00141	0.125	0.00074	0.2	0.00578	0.25	0.00862	0.5	0.02003	0.75	0.03182	0.8	0.03477	0.875	0.04016	0.9	0.04249	0.95	0.0492	111	0.01941	23.4107
42	0.05	-0.00722	0.1	-0.0014	0.125	0.00073	0.2	0.00577	0.25	0.00859	0.5	0.01999	0.75	0.03179	0.8	0.03472	0.875	0.04014	0.9	0.0425	0.95	0.04919	111	0.01906	23.3623
43	0.05	-0.00726	0.1	-0.00142	0.125	0.00073	0.2	0.00581	0.25	0.00863	0.5	0.02009	0.75	0.03197	0.8	0.03494	0.875	0.04041	0.9	0.04282	0.95	0.04956	111	0.0188	23.187
44	0.05	-0.00735	0.1	-0.00144	0.125	0.00074	0.2	0.00587	0.25	0.00872	0.5	0.02032	0.75	0.03238	0.8	0.0354	0.875	0.04094	0.9	0.04344	0.95	0.0503	111	0.01842	22.8889
45	0.05	-0.00747	0.1	-0.00146	0.125	0.00075	0.2	0.00597	0.25	0.00887	0.5	0.02066	0.75	0.03298	0.8	0.03605	0.875	0.04172	0.9	0.04425	0.95	0.05126	111	0.01815	22.5003
46	0.05	-0.00763	0.1	-0.00149	0.125	0.00077	0.2	0.0061	0.25	0.00906	0.5	0.0211	0.75	0.03372	0.8	0.03684	0.875	0.04264	0.9	0.04525	0.95	0.0524	111	0.01816	22.0383
47	0.05	-0.00783	0.1	-0.00153	0.125	0.00079	0.2	0.00625	0.25	0.0093	0.5	0.02165	0.75	0.03457	0.8	0.03777	0.875	0.04372	0.9	0.04639	0.95	0.05372	111	0.01851	21.5076
48	0.05	-0.00806	0.1	-0.00157	0.125	0.00081	0.2	0.00643	0.25	0.00957	0.5	0.02226	0.75	0.03553	0.8	0.03881	0.875	0.04494	0.9	0.04766	0.95	0.05512	111	0.01919	20.9305
49	0.05	-0.0083	0.1	-0.00162	0.125	0.00084	0.2	0.00663	0.25	0.00987	0.5	0.02294	0.75	0.03659	0.8	0.03997	0.875	0.04626	0.9	0.04905	0.95	0.05672	111	0.02006	20.3322
50	0.05	-0.00856	0.1	-0.00167	0.125	0.00087	0.2	0.00684	0.25	0.01019	0.5	0.02367	0.75	0.03775	0.8	0.04126	0.875	0.04769	0.9	0.05055	0.95	0.05841	111	0.0205	19.7393
51	0.05	-0.00884	0.1	-0.00171	0.125	0.0009	0.2	0.00706	0.25	0.01052	0.5	0.02443	0.75	0.03902	0.8	0.04262	0.875	0.04928	0.9	0.0522	0.95	0.06025	111	0.0217	19.1392
52	0.05	-0.00915	0.1	-0.00176	0.125	0.00093	0.2	0.00729	0.25	0.01086	0.5	0.02522	0.75	0.04035	0.8	0.04407	0.875	0.05097	0.9	0.05399	0.95	0.06229	111	0.02305	18.5709
53	0.05	-0.00945	0.1	-0.00182	0.125	0.00096	0.2	0.00754	0.25	0.01123	0.5	0.02605	0.75	0.04173	0.8	0.04558	0.875	0.05272	0.9	0.05579	0.95	0.06437	111	0.02373	17.9934
54	0.05	-0.00978	0.1	-0.00188	0.125	0.001	0.2	0.00781	0.25	0.01161	0.5	0.02693	0.75	0.04314	0.8	0.04714	0.875	0.05446	0.9	0.05764	0.95	0.06648	111	0.02454	17.4203
55	0.05	-0.01014	0.1	-0.00194	0.125	0.00103	0.2	0.00807	0.25	0.012	0.5	0.02781	0.75	0.04454	0.8	0.04865	0.875	0.05617	0.9	0.05943	0.95	0.06855	111	0.02544	16.9132
56	0.05	-0.01048	0.1	-0.00201	0.125	0.00107	0.2	0.00834	0.25	0.0124	0.5	0.02869	0.75	0.04589	0.8	0.05008	0.875	0.05783	0.9	0.06113	0.95	0.07053	111	0.02639	16.4648
57	0.05	-0.01083	0.1	-0.00208	0.125	0.0011	0.2	0.0086	0.25	0.01276	0.5	0.02952	0.75	0.04712	0.8	0.05137	0.875	0.05932	0.9	0.0627	0.95	0.07231	111	0.02746	16.042
58	0.05	-0.01117	0.1	-0.00214	0.125	0.00113	0.2	0.00883	0.25	0.01311	0.5	0.03026	0.75	0.04818	0.8	0.05252	0.875	0.06066	0.9	0.06406	0.95	0.07388	111	0.02842	15.6672
59	0.05	-0.0114	0.1	-0.00219	0.125	0.00115	0.2	0.00903	0.25	0.01338	0.5	0.03089	0.75	0.04907	0.8	0.05347	0.875	0.06172	0.9	0.06516	0.95	0.07512	111	0.02915	15.3416
60	0.05	-0.01161	0.1	-0.00224	0.125	0.00117	0.2	0.00917	0.25	0.0136	0.5	0.03135	0.75	0.04972	0.8	0.05419	0.875	0.06252	0.9	0.06598	0.95	0.076	111	0.02963	15.1004
61	0.05	-0.01175	0.1	-0.00226	0.125	0.00119	0.2	0.00926	0.25	0.01374	0.5	0.03164	0.75	0.05012	0.8	0.05463	0.875	0.06299	0.9	0.06647	0.95	0.07659	111	0.02994	14.9529
62	0.05	-0.0118	0.1	-0.00227	0.125	0.00119	0.2	0.0093	0.25	0.01379	0.5	0.03175	0.75	0.05027	0.8	0.05478	0.875	0.06316	0.9	0.06663	0.95	0.07678	111	0.03015	14.9159
63	0.05	-0.0118	0.1	-0.00226	0.125	0.00119	0.2	0.00929	0.25	0.01378	0.5	0.03169	0.75	0.05011	0.8	0.05465	0.875	0.06295	0.9	0.06644	0.95	0.07656	111	0.03024	14.9699
64	0.05	-0.01174	0.1	-0.00225	0.125	0.00118	0.2	0.00923	0.25	0.01371	0.5	0.0315	0.75	0.04977	0.8	0.05428	0.875	0.0625	0.9	0.06599	0.95	0.07602	111	0.0302	15.1231
65	0.05	-0.01162	0.1	-0.00223	0.125	0.00117	0.2	0.00914	0.25	0.01357	0.5	0.03118	0.75	0.04926	0.8	0.0537	0.875	0.06185	0.9	0.06527	0.95	0.07524	111	0.03015	15.3499
66	0.05	-0.01148	0.1	-0.0022	0.125	0.00116	0.2	0.00903	0.25	0.01341	0.5	0.03079	0.75	0.04866	0.8	0.05303	0.875	0.06108	0.9	0.06445	0.95	0.07429	111	0.02993	15.6288
67	0.05	-0.01134	0.1	-0.00217	0.125	0.00114	0.2	0.00892	0.25	0.01324	0.5	0.0304	0.75	0.04801	0.8	0.05234	0.875	0.06026	0.9	0.06361	0.95	0.07333	111	0.02961	15.8878
68	0.05	-0.01118	0.1	-0.00214	0.125	0.00114	0.2	0.00882	0.25	0.01309	0.5	0.03004	0.75	0.04744	0.8	0.0517	0.875	0.05945	0.9	0.06277	0.95	0.0724	111	0.02941	16.0976
69	0.05	-0.01109	0.1	-0.00212	0.125	0.00113	0.2	0.00874	0.25	0.01297	0.5	0.02975	0.75	0.04693	0.8	0.05116	0.875	0.05877	0.9	0.06207	0.95	0.07157	111	0.02947	16.2725
70	0.05	-0.01098	0.1	-0.00211	0.125	0.00112	0.2	0.00868	0.25	0.01288	0.5	0.02957	0.75	0.04656	0.8	0.05074	0.875	0.05829	0.9	0.06155	0.95	0.07091	111	0.02922	16.2865
71	0.05	-0.01092	0.1	-0.00211	0.125	0.00111	0.2	0.00864	0.25	0.01283	0.5	0.02947	0.75	0.04632	0.8	0.05051	0.875	0.05801	0.9	0.06125	0.95	0.07049	111	0.02906	16.2739
72	0.05	-0.01091	0.1	-0.00211	0.125	0.00111	0.2	0.00864	0.25	0.01285	0.5	0.02943	0.75	0.04628	0.8	0.05045	0.875	0.05799	0.9	0.06122	0.95	0.07054	111	0.0287	16.2191
73	0.05	-0.01097	0.1	-0.00213	0.125	0.00112	0.2	0.00866	0.25	0.01288	0.5	0.02948	0.75	0.04644	0.8	0.05059	0.875	0.0582	0.9	0.06145	0.95	0.07089	111	0.02818	16.143
74	0.05	-0.01105	0.1	-0.00214	0.125	0.00112	0.2	0.0087	0.25	0.01294	0.5	0.02967	0.75	0.04679	0.8	0.05096	0.875	0.05866	0.9	0.06198	0.95	0.07154	111	0.02962	16.1712
75	0.05	-0.01115	0.1	-0.00216	0.125	0.00113	0.2	0.00878	0.25	0.01305	0.5	0.02994	0.75	0.04729	0.8	0.0515	0.875	0.05931	0.9	0.06271	0.95	0.07254	111	0.03028	16.0236
76	0.05	-0.01129	0.1	-0.0022	0.125	0.00115	0.2	0.00888	0.25	0.0132	0.5	0.03033	0.75	0.04792	0.8	0.0522	0.875	0.06016	0.9	0.06364	0.95	0.07364	111	0.03049	15.7622
77	0.05	-0.01145	0.1	-0.00223	0.125	0.00116	0.2	0.00902	0.25	0.01341	0.5	0.03082	0.75	0.04872	0.8	0.05306	0.875	0.06117	0.9	0.06474	0.95	0.07486	111	0.03065	15.4662
78	0.05	-0.01166	0.1	-0.00226	0.125	0.00118	0.2	0.00919	0.25	0.01367	0.5	0.03143	0.75	0.04965	0.8	0.05407	0.875	0.06234	0.9	0.06595	0.95	0.07615	111	0.03111	15.1391
79	0.05	-0.01191	0.1	-0.00231	0.125	0.00121	0.2	0.00939	0.25	0.01398	0.5	0.03213	0.75	0.05075	0.8	0.05527	0.875	0.06373	0.9	0.06738	0.95	0.07768	111	0.0298	14.7628
80	0.05	-0.01217	0.1	-0.00236	0.125	0.00125	0.2	0.00963	0.25	0.01434	0.5	0.03297	0.75	0.05203	0.8	0.05669	0.875	0.06532	0.9	0.069	0.95	0.07949	111	0.03067	14.3778
81	0.05	-0.01248	0.1	-0.00242	0.125	0.00128	0.2	0.00991	0.25	0.01477	0.5	0.03395	0.75	0.05354	0.8	0.05836	0.875	0.0672	0.9	0.07104	0.95	0.08165	111	0.03274	13.9812
82	0.05	-0.01288	0.1	-0.00249	0.125	0.00132	0.2	0.01025	0.25	0.01524	0.5	0.03502	0.75	0.05531	0.8	0.06025	0.875	0.06942	0.9	0.07331	0.95	0.08432	111	0.03395	13.6112
83	0.05	-0.01337	0.1	-0.00258	0.125	0.00138	0.2	0.01062	0.25	0.01579	0.5	0.03623	0.75	0.05727	0.8	0.0624	0.875	0.07185	0.9	0.07586	0.95	0.08729	111	0.03477	13.1816
84	0.05	-0.0139	0.1	-0.00267	0.125	0.00143	0.2	0.01103	0.25	0.0164	0.5	0.03757	0.75	0.05944	0.8	0.06475	0.875	0.07456	0.9	0.07871	0.95	0.09056	111	0.0359	12.7437
85	0.05	-0.0145	0.1	-0.00277	0.125	0.00148	0.2	0.01147	0.25	0.01707	0.5	0.03905	0.75	0.06181	0.8	0.06731	0.875	0.07747	0.9	0.08178	0.95	0.09403	111	0.03699	12.2811
86	0.05	-0.01516	0.1	-0.00288	0.125	0.00154	0.2	0.01196	0.25	0.01776	0.5	0.04063	0.75	0.06424	0.8	0.06998	0.875	0.0805	0.9	0.08498	0.95	0.09763	111	0.03822	11.8166
87	0.05	-0.0158	0.1	-0.00301	0.125	0.0016	0.2	0.01246	0.25	0.01848	0.5	0.04227	0.75	0.06675	0.8	0.07265	0.875	0.08357	0.9	0.08816	0.95	0.10126	111	0.03967	11.3634
88	0.05	-0.01643	0.1	-0.00313	0.125	0.00166	0.2	0.01295	0.25	0.01921	0.5	0.04387	0.75	0.06922	0.8	0.07529	0.875	0.08656	0.9	0.09126	0.95	0.10472	111	0.04127	10.9391
89	0.05	-0.01706	0.1	-0.00325	0.125	0.00173	0.2	0.01341	0.25	0.01989	0.5	0.04541	0.75	0.07147	0.8	0.0777	0.875	0.08921	0.9	0.09409	0.95	0.10789	111	0.04288	10.5686
90	0.05	-0.01758	0.1	-0.00335	0.125	0.00178	0.2	0.01381	0.25	0.02049	0.5	0.04673	0.75	0.07346	0.8	0.07982	0.875	0.09156	0.9	0.09657	0.95	0.11067	111	0.04436	10.2773
91	0.05	-0.01802	0.1	-0.00344	0.125	0.00182	0.2	0.01415	0.25	0.02097	0.5	0.04778	0.75	0.07502	0.8	0.0815	0.875	0.09345	0.9	0.09854	0.95	0.11282	111	0.04558	10.0689
92	0.05	-0.01836	0.1	-0.0035	0.125	0.00186	0.2	0.01438	0.25	0.02131	0.5	0.04849	0.75	0.07608	0.8	0.08268	0.875	0.09469	0.9	0.09988	0.95	0.11427	111	0.04654	9.94711
93	0.05	-0.01855	0.1	-0.00353	0.125	0.00188	0.2	0.01452	0.25	0.0215	0.5	0.04885	0.75	0.07662	0.8	0.08323	0.875	0.09537	0.9	0.10049	0.95	0.11504	111	0.04708	9.91469
94	0.05	-0.01855	0.1	-0.00353	0.125	0.00187	0.2	0.01453	0.25	0.0215	0.5	0.04886	0.75	0.07662	0.8	0.08325	0.875	0.09529	0.9	0.10042	0.95	0.1149	111	0.04705	9.95828
95	0.05	-0.01839	0.1	-0.00351	0.125	0.00186	0.2	0.01443	0.25	0.02135	0.5	0.04849	0.75	0.07608	0.8	0.08268	0.875	0.09467	0.9	0.09978	0.95	0.11419	111	0.04648	10.0772
96	0.05	-0.01817	0.1	-0.00345	0.125	0.00184	0.2	0.01424	0.25	0.02105	0.5	0.04786	0.75	0.07514	0.8	0.08164	0.875	0.09351	0.9	0.09851	0.95	0.11282	111	0.04718	10.186
97	0.05	-0.01785	0.1	-0.00339	0.125	0.00181	0.2	0.014	0.25	0.02064	0.5	0.04697	0.75	0.07378	0.8	0.08019	0.875	0.09182	0.9	0.09678	0.95	0.11083	111	0.04669	10.3472
98	0.05	-0.01742	0.1	-0.00331	0.125	0.00177	0.2	0.01367	0.25	0.02014	0.5	0.04585	0.75	0.07207	0.8	0.07834	0.875	0.08976	0.9	0.09463	0.95	0.10837	111	0.04483	10.5651
99	0.05	-0.01693	0.1	-0.00322	0.125	0.00172	0.2	0.01332	0.25	0.01962	0.5	0.04462	0.75	0.07011	0.8	0.0762	0.875	0.08731	0.9	0.0921	0.95	0.1055	111	0.04365	10.871
100	0.05	-0.01643	0.1	-0.00314	0.125	0.00168	0.2	0.01294	0.25	0.01905	0.5	0.0433	0.75	0.06798	0.8	0.07386	0.875	0.08466	0.9	0.08926	0.95	0.10237	111	0.04299	11.2525
101	0.05	-0.01592	0.1	-0.00305	0.125	0.00163	0.2	0.01255	0.25	0.01847	0.5	0.04193	0.75	0.06574	0.8	0.07142	0.875	0.08181	0.9	0.08636	0.95	0.09911	111	0.04124	11.6427
102	0.05	-0.01541	0.1	-0.00296	0.125	0.00157	0.2	0.01216	0.25	0.01785	0.5	0.04055	0.75	0.06347	0.8	0.06895	0.875	0.07902	0.9	0.08337	0.95	0.09578	111	0.03951	12.079
103	0.05	-0.01486	0.1	-0.00288	0.125	0.00152	0.2	0.01172	0.25	0.01726	0.5	0.03917	0.75	0.06121	0.8	0.06655	0.875	0.07621	0.9	0.08045	0.95	0.09246	111	0.03872	12.5012
104	0.05	-0.01433	0.1	-0.00278	0.125	0.00146	0.2	0.01127	0.25	0.01664	0.5	0.03776	0.75	0.05901	0.8	0.06416	0.875	0.07351	0.9	0.07766	0.95	0.08937	111	0.03682	12.8792
105	0.05	-0.01379	0.1	-0.00269	0.125	0.0014	0.2	0.01085	0.25	0.01602	0.5	0.03638	0.75	0.05691	0.8	0.06185	0.875	0.07098	0.9	0.075	0.95	0.08634	111	0.03502	13.2678
106	0.05	-0.01328	0.1	-0.0026	0.125	0.00134	0.2	0.01043	0.25	0.01541	0.5	0.03506	0.75	0.05489	0.8	0.05966	0.875	0.06853	0.9	0.0725	0.95	0.08348	111	0.03364	13.7225
107	0.05	-0.01278	0.1	-0.0025	0.125	0.0013	0.2	0.01004	0.25	0.01484	0.5	0.03381	0.75	0.05298	0.8	0.05759	0.875	0.06618	0.9	0.07002	0.95	0.08067	111	0.03237	14.1936
108	0.05	-0.01233	0.1	-0.0024	0.125	0.00125	0.2	0.00968	0.25	0.01434	0.5	0.03269	0.75	0.05123	0.8	0.05573	0.875	0.06404	0.9	0.06775	0.95	0.07809	111	0.03133	14.6469
109	0.05	-0.01191	0.1	-0.00232	0.125	0.00121	0.2	0.00937	0.25	0.01389	0.5	0.03168	0.75	0.04968	0.8	0.05407	0.875	0.06214	0.9	0.06574	0.95	0.07576	111	0.03047	15.0773
110	0.05	-0.01153	0.1	-0.00225	0.125	0.00118	0.2	0.00909	0.25	0.01351	0.5	0.03083	0.75	0.04839	0.8	0.05264	0.875	0.06053	0.9	0.06402	0.95	0.07378	111	0.02983	15.4767
111	0.05	-0.01121	0.1	-0.00218	0.125	0.00115	0.2	0.00887	0.25	0.01318	0.5	0.03014	0.75	0.04735	0.8	0.05149	0.875	0.05922	0.9	0.06265	0.95	0.07218	111	0.02938	15.8317
112	0.05	-0.01098	0.1	-0.00214	0.125	0.00113	0.2	0.00872	0.25	0.01294	0.5	0.02961	0.75	0.04658	0.8	0.05067	0.875	0.05832	0.9	0.06168	0.95	0.07113	111	0.0296	16.3965
113	0.05	-0.01083	0.1	-0.00211	0.125	0.00111	0.2	0.00861	0.25	0.01277	0.5	0.02927	0.75	0.04612	0.8	0.05015	0.875	0.05777	0.9	0.06113	0.95	0.07047	111	0.02836	16.2759
114	0.05	-0.01076	0.1	-0.00209	0.125	0.0011	0.2	0.00857	0.25	0.01271	0.5	0.02913	0.75	0.04593	0.8	0.04997	0.875	0.05754	0.9	0.06089	0.95	0.07024	111	0.02808	16.3366
115	0.05	-0.01077	0.1	-0.00209	0.125	0.0011	0.2	0.00857	0.25	0.01272	0.5	0.02916	0.75	0.04599	0.8	0.05005	0.875	0.05766	0.9	0.06103	0.95	0.07038	111	0.02809	16.3084
116	0.05	-0.01083	0.1	-0.00211	0.125	0.00111	0.2	0.00863	0.25	0.0128	0.5	0.02935	0.75	0.04632	0.8	0.05041	0.875	0.05807	0.9	0.06147	0.95	0.07089	111	0.02828	16.192
117	0.05	-0.01097	0.1	-0.00213	0.125	0.00112	0.2	0.00872	0.25	0.01295	0.5	0.02969	0.75	0.04684	0.8	0.05097	0.875	0.05872	0.9	0.06212	0.95	0.07167	111	0.02856	16.0054
118	0.05	-0.01111	0.1	-0.00216	0.125	0.00114	0.2	0.00884	0.25	0.01313	0.5	0.0301	0.75	0.04749	0.8	0.05167	0.875	0.05948	0.9	0.06298	0.95	0.07273	111	0.0289	15.7735
119	0.05	-0.01128	0.1	-0.0022	0.125	0.00116	0.2	0.00897	0.25	0.01333	0.5	0.03057	0.75	0.04822	0.8	0.05245	0.875	0.06039	0.9	0.06388	0.95	0.07381	111	0.02933	15.5262
120	0.05	-0.01146	0.1	-0.00223	0.125	0.00118	0.2	0.00912	0.25	0.01353	0.5	0.03104	0.75	0.04894	0.8	0.05326	0.875	0.0613	0.9	0.06481	0.95	0.0749	111	0.02973	15.2879
121	0.05	-0.01164	0.1	-0.00226	0.125	0.00119	0.2	0.00925	0.25	0.01372	0.5	0.03147	0.75	0.04962	0.8	0.05399	0.875	0.06211	0.9	0.0657	0.95	0.07589	111	0.03012	15.0834
122	0.05	-0.01178	0.1	-0.00228	0.125	0.00121	0.2	0.00935	0.25	0.01388	0.5	0.03181	0.75	0.05016	0.8	0.05459	0.875	0.06279	0.9	0.06644	0.95	0.07667	111	0.03044	14.9233
123	0.05	-0.01187	0.1	-0.00229	0.125	0.00121	0.2	0.00942	0.25	0.01397	0.5	0.03203	0.75	0.05053	0.8	0.05501	0.875	0.06327	0.9	0.06694	0.95	0.07724	111	0.03065	14.8204
124	0.05	-0.01191	0.1	-0.0023	0.125	0.00121	0.2	0.00944	0.25	0.01399	0.5	0.03212	0.75	0.05073	0.8	0.05524	0.875	0.06355	0.9	0.06717	0.95	0.07757	111	0.03061	14.7735
125	0.05	-0.0119	0.1	-0.00229	0.125	0.00121	0.2	0.00943	0.25	0.01396	0.5	0.03207	0.75	0.05075	0.8	0.05526	0.875	0.06355	0.9	0.06722	0.95	0.07766	111	0.03025	14.7846
126	0.05	-0.01182	0.1	-0.00227	0.125	0.0012	0.2	0.00937	0.25	0.01387	0.5	0.03186	0.75	0.05055	0.8	0.05511	0.875	0.06339	0.9	0.06705	0.95	0.07746	111	0.02967	14.8508
127	0.05	-0.0117	0.1	-0.00224	0.125	0.00119	0.2	0.00928	0.25	0.01373	0.5	0.03154	0.75	0.05017	0.8	0.05468	0.875	0.06292	0.9	0.0666	0.95	0.07693	111	0.02915	14.9628
128	0.05	-0.01155	0.1	-0.0022	0.125	0.00117	0.2	0.00916	0.25	0.01354	0.5	0.03112	0.75	0.04956	0.8	0.05404	0.875	0.06221	0.9	0.06585	0.95	0.07605	111	0.02881	15.1179
129	0.05	-0.01138	0.1	-0.00217	0.125	0.00115	0.2	0.00901	0.25	0.01331	0.5	0.03062	0.75	0.04877	0.8	0.05317	0.875	0.06125	0.9	0.0648	0.95	0.07485	111	0.02843	15.3646
130	0.05	-0.01115	0.1	-0.00213	0.125	0.00114	0.2	0.00885	0.25	0.01308	0.5	0.03003	0.75	0.04776	0.8	0.05209	0.875	0.06001	0.9	0.06347	0.95	0.07332	111	0.02799	15.7127
131	0.05	-0.01092	0.1	-0.00209	0.125	0.00111	0.2	0.00865	0.25	0.01279	0.5	0.02935	0.75	0.04663	0.8	0.05085	0.875	0.05854	0.9	0.06193	0.95	0.07157	111	0.02757	16.1513
132	0.05	-0.01066	0.1	-0.00205	0.125	0.00108	0.2	0.00845	0.25	0.01248	0.5	0.02862	0.75	0.0454	0.8	0.04945	0.875	0.05692	0.9	0.06023	0.95	0.06965	111	0.02716	16.6328
133	0.05	-0.01036	0.1	-0.002	0.125	0.00105	0.2	0.0082	0.25	0.01214	0.5	0.02781	0.75	0.04403	0.8	0.04801	0.875	0.05522	0.9	0.05844	0.95	0.06757	111	0.02661	17.1264
134	0.05	-0.01002	0.1	-0.00194	0.125	0.00102	0.2	0.00794	0.25	0.01176	0.5	0.02694	0.75	0.04265	0.8	0.04648	0.875	0.05348	0.9	0.0566	0.95	0.06537	111	0.02578	17.6789
135	0.05	-0.00968	0.1	-0.00187	0.125	0.00098	0.2	0.00765	0.25	0.01137	0.5	0.02604	0.75	0.04121	0.8	0.04491	0.875	0.05167	0.9	0.05474	0.95	0.06323	111	0.02494	18.2426
136	0.05	-0.00934	0.1	-0.00181	0.125	0.00095	0.2	0.00737	0.25	0.01094	0.5	0.02511	0.75	0.03975	0.8	0.04335	0.875	0.0499	0.9	0.05283	0.95	0.06104	111	0.02401	18.8686
137	0.05	-0.00898	0.1	-0.00174	0.125	0.00091	0.2	0.00709	0.25	0.01052	0.5	0.02418	0.75	0.0383	0.8	0.04176	0.875	0.04813	0.9	0.05094	0.95	0.0589	111	0.02312	19.5428
138	0.05	-0.00862	0.1	-0.00167	0.125	0.00087	0.2	0.00681	0.25	0.01011	0.5	0.0233	0.75	0.03692	0.8	0.04027	0.875	0.04643	0.9	0.04913	0.95	0.05682	111	0.02231	20.236
139	0.05	-0.00831	0.1	-0.00161	0.125	0.00084	0.2	0.00656	0.25	0.00974	0.5	0.02249	0.75	0.03563	0.8	0.03888	0.875	0.04485	0.9	0.04744	0.95	0.05491	111	0.02156	20.9409
140	0.05	-0.008	0.1	-0.00155	0.125	0.00081	0.2	0.00633	0.25	0.00941	0.5	0.02176	0.75	0.03449	0.8	0.03765	0.875	0.04346	0.9	0.04595	0.95	0.05319	111	0.02095	21.6008
141	0.05	-0.00775	0.1	-0.0015	0.125	0.00078	0.2	0.00614	0.25	0.00913	0.5	0.02116	0.75	0.03354	0.8	0.03666	0.875	0.0423	0.9	0.04472	0.95	0.05177	111	0.02043	22.2019
142	0.05	-0.00753	0.1	-0.00146	0.125	0.00076	0.2	0.00599	0.25	0.00891	0.5	0.02068	0.75	0.03281	0.8	0.03588	0.875	0.04139	0.9	0.04376	0.95	0.05068	111	0.02004	22.6901
143	0.05	-0.00737	0.1	-0.00144	0.125	0.00075	0.2	0.00588	0.25	0.00875	0.5	0.02036	0.75	0.0323	0.8	0.03533	0.875	0.04082	0.9	0.04312	0.95	0.04995	111	0.0198	23.0457
144	0.05	-0.0073	0.1	-0.00142	0.125	0.00074	0.2	0.00582	0.25	0.00867	0.5	0.02018	0.75	0.03204	0.8	0.03505	0.875	0.04051	0.9	0.04282	0.95	0.04959	111	0.0195	23.2082
145	0.05	-0.00727	0.1	-0.00142	0.125	0.00074	0.2	0.00581	0.25	0.00865	0.5	0.02015	0.75	0.03201	0.8	0.03502	0.875	0.04051	0.9	0.04287	0.95	0.04962	111	0.01924	23.1911
146	0.05	-0.0073	0.1	-0.00143	0.125	0.00074	0.2	0.00585	0.25	0.00869	0.5	0.02027	0.75	0.03222	0.8	0.03525	0.875	0.04084	0.9	0.04324	0.95	0.05004	111	0.01912	23.0123
147	0.05	-0.00739	0.1	-0.00145	0.125	0.00075	0.2	0.00592	0.25	0.0088	0.5	0.02052	0.75	0.03267	0.8	0.03575	0.875	0.04147	0.9	0.0439	0.95	0.05083	111	0.01913	22.7084
148	0.05	-0.00754	0.1	-0.00147	0.125	0.00077	0.2	0.00603	0.25	0.00896	0.5	0.02091	0.75	0.03335	0.8	0.03646	0.875	0.04235	0.9	0.04486	0.95	0.05199	111	0.01926	22.3008
149	0.05	-0.00772	0.1	-0.00151	0.125	0.00079	0.2	0.00618	0.25	0.00917	0.5	0.02141	0.75	0.03423	0.8	0.03738	0.875	0.0435	0.9	0.04607	0.95	0.0534	111	0.01952	21.7911
150	0.05	-0.00793	0.1	-0.00155	0.125	0.00081	0.2	0.00635	0.25	0.00942	0.5	0.02202	0.75	0.03525	0.8	0.03848	0.875	0.0448	0.9	0.04747	0.95	0.05503	111	0.01994	21.205
151	0.05	-0.00818	0.1	-0.0016	0.125	0.00084	0.2	0.00655	0.25	0.00972	0.5	0.02272	0.75	0.03639	0.8	0.03972	0.875	0.04628	0.9	0.04903	0.95	0.05682	111	0.02051	20.5685
152	0.05	-0.00846	0.1	-0.00165	0.125	0.00087	0.2	0.00676	0.25	0.01005	0.5	0.0235	0.75	0.03762	0.8	0.04107	0.875	0.04786	0.9	0.05072	0.95	0.05872	111	0.0213	19.8991
153	0.05	-0.00875	0.1	-0.00171	0.125	0.00089	0.2	0.007	0.25	0.01042	0.5	0.02434	0.75	0.03894	0.8	0.04253	0.875	0.04956	0.9	0.05248	0.95	0.06078	111	0.02219	19.2112
154	0.05	-0.00902	0.1	-0.00176	0.125	0.00093	0.2	0.00725	0.25	0.01081	0.5	0.02523	0.75	0.04033	0.8	0.04407	0.875	0.05133	0.9	0.05434	0.95	0.06297	111	0.02332	18.5489
155	0.05	-0.00934	0.1	-0.00182	0.125	0.00096	0.2	0.00751	0.25	0.0112	0.5	0.02613	0.75	0.04181	0.8	0.04569	0.875	0.05319	0.9	0.05628	0.95	0.0653	111	0.02464	17.9677
156	0.05	-0.00968	0.1	-0.00188	0.125	0.00099	0.2	0.00778	0.25	0.0116	0.5	0.02703	0.75	0.04333	0.8	0.04739	0.875	0.0551	0.9	0.05836	0.95	0.06768	111	0.02579	17.4443
157	0.05	-0.01004	0.1	-0.00194	0.125	0.00102	0.2	0.00804	0.25	0.012	0.5	0.02793	0.75	0.04493	0.8	0.0491	0.875	0.05709	0.9	0.06051	0.95	0.07012	111	0.02642	16.9655
158	0.05	-0.0104	0.1	-0.002	0.125	0.00106	0.2	0.00831	0.25	0.01241	0.5	0.02885	0.75	0.04647	0.8	0.0508	0.875	0.05912	0.9	0.0627	0.95	0.07253	111	0.0269	16.4897
