# Supplementary material for: Time-varying asymmetry and tail thickness in long series of daily financial returns
Source: publisher site journal article supplement (doi:10.1515/snde-2017-0071), 2018-10-02
Supplement: Supplementary file 317 [file thres_ni1.xlsx]

## Sheet: 1
	Var1	Var2	Var3	Var4	Var5	Var6	Var7	Var8	Var9	Var10	Var11	Var12	Var13	Var14	Var15	Var16	Var17	Var18	Var19	Var20	Var21	Var22	Var23	Var24	Var25
1	0	0	0	0	0	0	0	0	0	0	0	0	0	0	0	0	0	0	0	0	0	0	0	0	0
2	0.05	3.1233	0.1	3.2285	0.125	3.2695	0.2	3.376	0.25	3.4378	0.5	3.73	0.75	4.0892	0.8	4.1875	0.875	4.3862	0.9	4.4835	0.95	4.7843	111	3.6258	0.870657
3	0.05	3.1404	0.1	3.2443	0.125	3.2851	0.2	3.388	0.25	3.4471	0.5	3.7225	0.75	4.0537	0.8	4.144	0.875	4.3189	0.9	4.3986	0.95	4.6389	111	3.5707	0.924676
4	0.05	3.1516	0.1	3.2526	0.125	3.2926	0.2	3.3909	0.25	3.4471	0.5	3.7107	0.75	4.0235	0.8	4.1062	0.875	4.2661	0.9	4.3375	0.95	4.5467	111	3.5724	0.966345
5	0.05	3.1459	0.1	3.2457	0.125	3.2841	0.2	3.3847	0.25	3.4413	0.5	3.7	0.75	4.006	0.8	4.0883	0.875	4.2437	0.9	4.3116	0.95	4.5092	111	3.6114	0.979894
6	0.05	3.1138	0.1	3.2251	0.125	3.2663	0.2	3.3697	0.25	3.4316	0.5	3.6979	0.75	4.0079	0.8	4.0929	0.875	4.2483	0.9	4.3157	0.95	4.5085	111	3.5787	0.961074
7	0.05	3.0595	0.1	3.1881	0.125	3.2384	0.2	3.3556	0.25	3.4255	0.5	3.7095	0.75	4.0259	0.8	4.1109	0.875	4.2688	0.9	4.3362	0.95	4.5267	111	3.5993	0.929314
8	0.05	2.9924	0.1	3.1454	0.125	3.2085	0.2	3.3515	0.25	3.4285	0.5	3.7334	0.75	4.0538	0.8	4.1388	0.875	4.2973	0.9	4.3666	0.95	4.555	111	3.6943	0.873191
9	0.05	2.9357	0.1	3.1045	0.125	3.1824	0.2	3.3572	0.25	3.4423	0.5	3.7655	0.75	4.0867	0.8	4.17	0.875	4.3304	0.9	4.3994	0.95	4.5887	111	3.7643	0.853499
10	0.05	2.9068	0.1	3.0832	0.125	3.1726	0.2	3.3724	0.25	3.4662	0.5	3.7997	0.75	4.1227	0.8	4.2048	0.875	4.3663	0.9	4.4339	0.95	4.627	111	3.8249	0.833528
11	0.05	2.9228	0.1	3.0896	0.125	3.1835	0.2	3.3938	0.25	3.4936	0.5	3.8362	0.75	4.1612	0.8	4.2445	0.875	4.4029	0.9	4.4706	0.95	4.6701	111	3.8614	0.825534
12	0.05	2.944	0.1	3.124	0.125	3.2135	0.2	3.4226	0.25	3.5242	0.5	3.8717	0.75	4.2004	0.8	4.2845	0.875	4.4411	0.9	4.5109	0.95	4.7143	111	3.9216	0.821249
13	0.05	2.9934	0.1	3.1799	0.125	3.2651	0.2	3.4578	0.25	3.5586	0.5	3.9057	0.75	4.2411	0.8	4.325	0.875	4.4833	0.9	4.5558	0.95	4.7587	111	3.9199	0.814469
14	0.05	3.0769	0.1	3.2521	0.125	3.33	0.2	3.5026	0.25	3.5951	0.5	3.9386	0.75	4.2794	0.8	4.3664	0.875	4.5294	0.9	4.6032	0.95	4.8063	111	3.9295	0.813911
15	0.05	3.1774	0.1	3.3343	0.125	3.3972	0.2	3.5562	0.25	3.6389	0.5	3.9734	0.75	4.3174	0.8	4.4073	0.875	4.5774	0.9	4.6522	0.95	4.8566	111	3.936	0.803906
16	0.05	3.278	0.1	3.4204	0.125	3.4747	0.2	3.6139	0.25	3.6904	0.5	4.0113	0.75	4.359	0.8	4.4521	0.875	4.628	0.9	4.7036	0.95	4.9118	111	3.9237	0.813377
17	0.05	3.3597	0.1	3.4934	0.125	3.5447	0.2	3.6737	0.25	3.7445	0.5	4.0543	0.75	4.4063	0.8	4.501	0.875	4.6826	0.9	4.7582	0.95	4.9706	111	3.9635	0.83192
18	0.05	3.4174	0.1	3.5482	0.125	3.6001	0.2	3.7251	0.25	3.7943	0.5	4.1027	0.75	4.4593	0.8	4.5554	0.875	4.7403	0.9	4.8186	0.95	5.0415	111	4.0069	0.836208
19	0.05	3.4586	0.1	3.5879	0.125	3.6402	0.2	3.7639	0.25	3.8339	0.5	4.1473	0.75	4.5139	0.8	4.6143	0.875	4.8041	0.9	4.8874	0.95	5.1266	111	3.9898	0.817452
20	0.05	3.4795	0.1	3.6147	0.125	3.6667	0.2	3.7917	0.25	3.8635	0.5	4.1835	0.75	4.5656	0.8	4.6678	0.875	4.8681	0.9	4.9556	0.95	5.2229	111	4.0279	0.807529
21	0.05	3.4919	0.1	3.6294	0.125	3.6843	0.2	3.81	0.25	3.8829	0.5	4.2099	0.75	4.6081	0.8	4.7153	0.875	4.9247	0.9	5.0186	0.95	5.3088	111	4.0482	0.790157
22	0.05	3.4973	0.1	3.6372	0.125	3.692	0.2	3.8204	0.25	3.8956	0.5	4.2288	0.75	4.64	0.8	4.7516	0.875	4.9701	0.9	5.0712	0.95	5.3764	111	4.0647	0.766807
23	0.05	3.4975	0.1	3.6387	0.125	3.6932	0.2	3.8251	0.25	3.9002	0.5	4.2419	0.75	4.6629	0.8	4.7778	0.875	5.0009	0.9	5.1056	0.95	5.4243	111	4.0664	0.748559
24	0.05	3.4946	0.1	3.6351	0.125	3.6894	0.2	3.8239	0.25	3.9005	0.5	4.2519	0.75	4.6777	0.8	4.7947	0.875	5.0219	0.9	5.1264	0.95	5.4432	111	4.1066	0.735942
25	0.05	3.4859	0.1	3.626	0.125	3.6819	0.2	3.8211	0.25	3.9008	0.5	4.2597	0.75	4.6873	0.8	4.8069	0.875	5.0352	0.9	5.1368	0.95	5.4485	111	4.1094	0.708813
26	0.05	3.4699	0.1	3.6198	0.125	3.6777	0.2	3.8202	0.25	3.9026	0.5	4.2677	0.75	4.6971	0.8	4.8152	0.875	5.0418	0.9	5.1438	0.95	5.4523	111	4.1411	0.700123
27	0.05	3.4532	0.1	3.6158	0.125	3.6774	0.2	3.8239	0.25	3.9097	0.5	4.2794	0.75	4.7085	0.8	4.8249	0.875	5.051	0.9	5.1524	0.95	5.4572	111	4.1566	0.691573
28	0.05	3.4408	0.1	3.6204	0.125	3.6836	0.2	3.8364	0.25	3.9218	0.5	4.2961	0.75	4.7237	0.8	4.8403	0.875	5.0652	0.9	5.1677	0.95	5.4704	111	4.1687	0.680536
29	0.05	3.4433	0.1	3.6358	0.125	3.7024	0.2	3.8571	0.25	3.9423	0.5	4.3178	0.75	4.7452	0.8	4.8601	0.875	5.0868	0.9	5.1891	0.95	5.4908	111	4.2307	0.682069
30	0.05	3.4742	0.1	3.6687	0.125	3.736	0.2	3.8893	0.25	3.9749	0.5	4.3479	0.75	4.7749	0.8	4.8877	0.875	5.1131	0.9	5.2176	0.95	5.5195	111	4.2729	0.690715
31	0.05	3.5374	0.1	3.7215	0.125	3.7877	0.2	3.9389	0.25	4.0233	0.5	4.3886	0.75	4.812	0.8	4.9227	0.875	5.149	0.9	5.2517	0.95	5.5551	111	4.2833	0.704537
32	0.05	3.632	0.1	3.7953	0.125	3.8578	0.2	4.0074	0.25	4.0899	0.5	4.444	0.75	4.8641	0.8	4.9723	0.875	5.1939	0.9	5.2918	0.95	5.5996	111	4.3393	0.724509
33	0.05	3.7392	0.1	3.8904	0.125	3.9477	0.2	4.0915	0.25	4.172	0.5	4.5171	0.75	4.9297	0.8	5.0383	0.875	5.2564	0.9	5.3527	0.95	5.6554	111	4.3971	0.746626
34	0.05	3.8529	0.1	3.9963	0.125	4.0518	0.2	4.1919	0.25	4.2691	0.5	4.6135	0.75	5.0213	0.8	5.1318	0.875	5.3512	0.9	5.451	0.95	5.7587	111	4.465	0.747767
35	0.05	3.9556	0.1	4.1035	0.125	4.1605	0.2	4.3002	0.25	4.3776	0.5	4.7271	0.75	5.1433	0.8	5.2567	0.875	5.4915	0.9	5.5983	0.95	5.9359	111	4.563	0.736554
36	0.05	4.0432	0.1	4.2028	0.125	4.2623	0.2	4.4063	0.25	4.4883	0.5	4.8538	0.75	5.2965	0.8	5.4229	0.875	5.6829	0.9	5.8128	0.95	6.2327	111	4.7033	0.697542
37	0.05	4.1293	0.1	4.2956	0.125	4.3586	0.2	4.5078	0.25	4.5932	0.5	4.9833	0.75	5.4732	0.8	5.6206	0.875	5.9434	0.9	6.1094	0.95	6.6912	111	4.8224	0.654854
38	0.05	4.2215	0.1	4.3938	0.125	4.4588	0.2	4.6135	0.25	4.7022	0.5	5.1133	0.75	5.6547	0.8	5.8324	0.875	6.2737	0.9	6.5155	0.95	7.3482	111	4.9022	0.621417
39	0.05	4.3204	0.1	4.4979	0.125	4.5643	0.2	4.7268	0.25	4.8199	0.5	5.2488	0.75	5.8415	0.8	6.0554	0.875	6.6387	0.9	7.0004	0.95	8.073	111	5.0151	0.594299
40	0.05	4.4277	0.1	4.6117	0.125	4.6806	0.2	4.85	0.25	4.9483	0.5	5.3979	0.75	6.0372	0.8	6.2818	0.875	7.0303	0.9	7.5183	0.95	8.2458	111	5.1162	0.564766
41	0.05	4.5444	0.1	4.7337	0.125	4.8051	0.2	4.9838	0.25	5.0882	0.5	5.5678	0.75	6.2607	0.8	6.5324	0.875	7.4284	0.9	8.0025	0.95	8.4955	111	5.2803	0.537685
42	0.05	4.6671	0.1	4.8648	0.125	4.9407	0.2	5.1322	0.25	5.2432	0.5	5.7586	0.75	6.52	0.8	6.814	0.875	7.773	0.9	8.3767	0.95	8.8751	111	5.4752	0.502361
43	0.05	4.8023	0.1	5.0084	0.125	5.0893	0.2	5.2949	0.25	5.4163	0.5	5.9721	0.75	6.8089	0.8	7.1243	0.875	8.0647	0.9	8.6143	0.95	9.5341	111	5.6624	0.467158
44	0.05	4.948	0.1	5.1665	0.125	5.2535	0.2	5.4745	0.25	5.607	0.5	6.2105	0.75	7.124	0.8	7.448	0.875	8.3115	0.9	8.7625	0.95	10.316	111	5.8405	0.435235
45	0.05	5.1035	0.1	5.3385	0.125	5.432	0.2	5.6715	0.25	5.813	0.5	6.476	0.75	7.451	0.8	7.7695	0.875	8.5175	0.9	8.904	0.95	10.149	111	6.039	0.390038
46	0.05	5.2715	0.1	5.5275	0.125	5.627	0.2	5.8865	0.25	6.037	0.5	6.759	0.75	7.769	0.8	8.0685	0.875	8.716	0.9	9.0435	0.95	9.9975	111	6.2965	0.358533
47	0.05	5.448	0.1	5.7305	0.125	5.8385	0.2	6.1135	0.25	6.275	0.5	7.043	0.75	8.068	0.8	8.3565	0.875	8.938	0.9	9.211	0.95	10.0725	111	6.564	0.335916
48	0.05	5.6365	0.1	5.9375	0.125	6.051	0.2	6.3415	0.25	6.514	0.5	7.3245	0.75	8.3645	0.8	8.6505	0.875	9.2295	0.9	9.498	0.95	10.329	111	6.829	0.314199
49	0.05	5.822	0.1	6.1395	0.125	6.259	0.2	6.5715	0.25	6.752	0.5	7.603	0.75	8.702	0.8	9.0105	0.875	9.634	0.9	9.9125	0.95	10.794	111	7.1485	0.300497
50	0.05	5.9945	0.1	6.336	0.125	6.467	0.2	6.797	0.25	6.9905	0.5	7.9025	0.75	9.1085	0.8	9.4475	0.875	10.148	0.9	10.465	0.95	11.446	111	7.334	0.28006
51	0.05	6.158	0.1	6.527	0.125	6.67	0.2	7.026	0.25	7.237	0.5	8.247	0.75	9.586	0.8	9.967	0.875	10.757	0.9	11.115	0.95	12.208	111	7.658	0.254895
52	0.05	6.335	0.1	6.738	0.125	6.895	0.2	7.282	0.25	7.52	0.5	8.644	0.75	10.12	0.8	10.543	0.875	11.417	0.9	11.814	0.95	13.019	111	7.966	0.232294
53	0.05	6.561	0.1	6.998	0.125	7.166	0.2	7.594	0.25	7.85	0.5	9.081	0.75	10.686	0.8	11.15	0.875	12.105	0.9	12.553	0.95	13.872	111	8.336	0.210922
54	0.05	6.845	0.1	7.317	0.125	7.501	0.2	7.954	0.25	8.229	0.5	9.559	0.75	11.277	0.8	11.777	0.875	12.812	0.9	13.293	0.95	14.732	111	8.688	0.194184
55	0.05	7.176	0.1	7.689	0.125	7.889	0.2	8.375	0.25	8.667	0.5	10.073	0.75	11.885	0.8	12.419	0.875	13.523	0.9	14.04	0.95	15.613	111	9.213	0.183451
56	0.05	7.553	0.1	8.101	0.125	8.314	0.2	8.842	0.25	9.15	0.5	10.616	0.75	12.497	0.8	13.056	0.875	14.217	0.9	14.786	0.95	16.489	111	9.701	0.17545
57	0.05	7.937	0.1	8.526	0.125	8.755	0.2	9.323	0.25	9.656	0.5	11.189	0.75	13.111	0.8	13.695	0.875	14.908	0.9	15.512	0.95	17.317	111	10.236	0.168969
58	0.05	8.297	0.1	8.929	0.125	9.174	0.2	9.791	0.25	10.148	0.5	11.758	0.75	13.736	0.8	14.33	0.875	15.59	0.9	16.209	0.95	18.115	111	10.724	0.159853
59	0.05	8.616	0.1	9.293	0.125	9.549	0.2	10.217	0.25	10.594	0.5	12.289	0.75	14.346	0.8	14.947	0.875	16.244	0.9	16.869	0.95	18.844	111	11.298	0.1509
60	0.05	8.884	0.1	9.604	0.125	9.871	0.2	10.578	0.25	10.971	0.5	12.743	0.75	14.883	0.8	15.507	0.875	16.824	0.9	17.46	0.95	19.475	111	11.74	0.14546
61	0.05	9.112	0.1	9.858	0.125	10.144	0.2	10.859	0.25	11.277	0.5	13.094	0.75	15.297	0.8	15.94	0.875	17.289	0.9	17.942	0.95	19.985	111	12.093	0.140848
62	0.05	9.298	0.1	10.054	0.125	10.339	0.2	11.064	0.25	11.477	0.5	13.317	0.75	15.558	0.8	16.218	0.875	17.598	0.9	18.262	0.95	20.311	111	12.422	0.13882
63	0.05	9.427	0.1	10.161	0.125	10.437	0.2	11.148	0.25	11.562	0.5	13.402	0.75	15.657	0.8	16.322	0.875	17.731	0.9	18.42	0.95	20.481	111	12.583	0.138848
64	0.05	9.458	0.1	10.138	0.125	10.408	0.2	11.094	0.25	11.504	0.5	13.334	0.75	15.619	0.8	16.305	0.875	17.741	0.9	18.419	0.95	20.515	111	12.432	0.141276
65	0.05	9.301	0.1	9.964	0.125	10.22	0.2	10.895	0.25	11.299	0.5	13.141	0.75	15.491	0.8	16.193	0.875	17.639	0.9	18.326	0.95	20.414	111	12.194	0.139572
66	0.05	8.903	0.1	9.593	0.125	9.867	0.2	10.552	0.25	10.96	0.5	12.884	0.75	15.281	0.8	16.003	0.875	17.444	0.9	18.122	0.95	20.188	111	11.924	0.134768
67	0.05	8.306	0.1	9.048	0.125	9.353	0.2	10.122	0.25	10.572	0.5	12.607	0.75	15.001	0.8	15.713	0.875	17.145	0.9	17.777	0.95	19.832	111	11.738	0.127974
68	0.05	7.559	0.1	8.38	0.125	8.737	0.2	9.682	0.25	10.206	0.5	12.277	0.75	14.633	0.8	15.319	0.875	16.707	0.9	17.316	0.95	19.318	111	11.605	0.127324
69	0.05	6.795	0.1	7.663	0.125	8.123	0.2	9.296	0.25	9.854	0.5	11.889	0.75	14.168	0.8	14.828	0.875	16.143	0.9	16.752	0.95	18.667	111	11.352	0.130912
70	0.05	6.155	0.1	7.002	0.125	7.564	0.2	8.923	0.25	9.487	0.5	11.433	0.75	13.62	0.8	14.243	0.875	15.478	0.9	16.077	0.95	17.916	111	11.119	0.138764
71	0.05	5.714	0.1	6.443	0.125	7.079	0.2	8.537	0.25	9.09	0.5	10.925	0.75	12.993	0.8	13.587	0.875	14.751	0.9	15.31	0.95	17.062	111	10.663	0.147918
72	0.05	5.467	0.1	6.031	0.125	6.678	0.2	8.135	0.25	8.656	0.5	10.377	0.75	12.31	0.8	12.874	0.875	13.962	0.9	14.481	0.95	16.171	111	10.061	0.15739
73	0.05	5.223	0.1	5.767	0.125	6.36	0.2	7.713	0.25	8.194	0.5	9.801	0.75	11.592	0.8	12.111	0.875	13.137	0.9	13.612	0.95	15.203	111	9.439	0.169259
74	0.05	4.985	0.1	5.625	0.125	6.12	0.2	7.294	0.25	7.723	0.5	9.208	0.75	10.861	0.8	11.329	0.875	12.276	0.9	12.728	0.95	14.205	111	8.94	0.184027
75	0.05	4.938	0.1	5.585	0.125	5.968	0.2	6.882	0.25	7.258	0.5	8.619	0.75	10.124	0.8	10.551	0.875	11.425	0.9	11.846	0.95	13.194	111	8.459	0.201105
76	0.05	5.002	0.1	5.586	0.125	5.853	0.2	6.495	0.25	6.817	0.5	8.039	0.75	9.398	0.8	9.786	0.875	10.587	0.9	10.978	0.95	12.207	111	7.914	0.22158
77	0.05	5.077	0.1	5.552	0.125	5.73	0.2	6.171	0.25	6.422	0.5	7.481	0.75	8.7	0.8	9.045	0.875	9.777	0.9	10.126	0.95	11.24	111	7.322	0.248184
78	0.05	5.0965	0.1	5.441	0.125	5.573	0.2	5.904	0.25	6.095	0.5	6.9675	0.75	8.038	0.8	8.3485	0.875	9.0035	0.9	9.3175	0.95	10.313	111	6.6595	0.291784
79	0.05	5	0.1	5.2665	0.125	5.3735	0.2	5.6425	0.25	5.7985	0.5	6.5235	0.75	7.4345	0.8	7.71	0.875	8.2855	0.9	8.567	0.95	9.4475	111	6.2235	0.352061
80	0.05	4.8	0.1	5.041	0.125	5.1355	0.2	5.366	0.25	5.505	0.5	6.135	0.75	6.924	0.8	7.157	0.875	7.6545	0.9	7.8955	0.95	8.665	111	5.8675	0.405307
81	0.05	4.559	0.1	4.7785	0.125	4.861	0.2	5.073	0.25	5.201	0.5	5.7725	0.75	6.4825	0.8	6.691	0.875	7.127	0.9	7.3285	0.95	7.9925	111	5.472	0.446078
82	0.05	4.312	0.1	4.509	0.125	4.584	0.2	4.7785	0.25	4.894	0.5	5.4215	0.75	6.0765	0.8	6.2735	0.875	6.6715	0.9	6.8525	0.95	7.437	111	5.1255	0.482203
83	0.05	4.0835	0.1	4.2575	0.125	4.3245	0.2	4.498	0.25	4.602	0.5	5.0815	0.75	5.694	0.8	5.8765	0.875	6.2425	0.9	6.413	0.95	6.94	111	4.8095	0.529308
84	0.05	3.8758	0.1	4.0299	0.125	4.0907	0.2	4.2436	0.25	4.3363	0.5	4.767	0.75	5.3239	0.8	5.4927	0.875	5.8251	0.9	5.9851	0.95	6.4626	111	4.5156	0.591442
85	0.05	3.6899	0.1	3.8263	0.125	3.8797	0.2	4.0157	0.25	4.0979	0.5	4.4791	0.75	4.973	0.8	5.1226	0.875	5.4188	0.9	5.5547	0.95	5.9767	111	4.2601	0.668268
86	0.05	3.525	0.1	3.6461	0.125	3.6926	0.2	3.8145	0.25	3.8869	0.5	4.2218	0.75	4.6497	0.8	4.7778	0.875	5.0299	0.9	5.1497	0.95	5.5112	111	4.0427	0.757889
87	0.05	3.3798	0.1	3.4868	0.125	3.5286	0.2	3.6376	0.25	3.7006	0.5	3.9941	0.75	4.3592	0.8	4.4658	0.875	4.6778	0.9	4.7768	0.95	5.0808	111	3.8558	0.863062
88	0.05	3.2516	0.1	3.3472	0.125	3.3849	0.2	3.4805	0.25	3.5358	0.5	3.7945	0.75	4.1045	0.8	4.1919	0.875	4.3714	0.9	4.4544	0.95	4.7094	111	3.6789	0.979191
89	0.05	3.1385	0.1	3.2249	0.125	3.2584	0.2	3.3439	0.25	3.392	0.5	3.6188	0.75	3.888	0.8	3.9635	0.875	4.1173	0.9	4.1874	0.95	4.4047	111	3.5509	1.12574
90	0.05	3.0376	0.1	3.1165	0.125	3.1478	0.2	3.2257	0.25	3.2692	0.5	3.4696	0.75	3.7079	0.8	3.7749	0.875	3.9078	0.9	3.9694	0.95	4.1573	111	3.3842	1.27102
91	0.05	2.9512	0.1	3.0245	0.125	3.0536	0.2	3.1247	0.25	3.1645	0.5	3.3455	0.75	3.5614	0.8	3.6208	0.875	3.7388	0.9	3.7937	0.95	3.9567	111	3.2473	1.40111
92	0.05	2.8796	0.1	2.9489	0.125	2.9758	0.2	3.041	0.25	3.0783	0.5	3.2442	0.75	3.4417	0.8	3.4954	0.875	3.6013	0.9	3.6498	0.95	3.7941	111	3.1631	1.53231
93	0.05	2.8246	0.1	2.8903	0.125	2.9151	0.2	2.9756	0.25	3.01	0.5	3.1636	0.75	3.3454	0.8	3.395	0.875	3.49	0.9	3.5328	0.95	3.6621	111	3.0902	1.67131
94	0.05	2.7853	0.1	2.8471	0.125	2.8706	0.2	2.9268	0.25	2.9586	0.5	3.1012	0.75	3.2688	0.8	3.3149	0.875	3.4013	0.9	3.4404	0.95	3.5551	111	3.0353	1.79593
95	0.05	2.759	0.1	2.8173	0.125	2.839	0.2	2.893	0.25	2.9227	0.5	3.0552	0.75	3.2108	0.8	3.2532	0.875	3.3339	0.9	3.3696	0.95	3.4736	111	3.0028	1.93288
96	0.05	2.7404	0.1	2.7969	0.125	2.8176	0.2	2.8691	0.25	2.898	0.5	3.0254	0.75	3.172	0.8	3.2114	0.875	3.2868	0.9	3.3212	0.95	3.4194	111	2.9859	2.01809
97	0.05	2.727	0.1	2.7817	0.125	2.8022	0.2	2.8527	0.25	2.8814	0.5	3.0076	0.75	3.1519	0.8	3.1904	0.875	3.2655	0.9	3.2998	0.95	3.3963	111	2.9647	2.02626
98	0.05	2.7165	0.1	2.7707	0.125	2.791	0.2	2.8408	0.25	2.8696	0.5	2.9973	0.75	3.1483	0.8	3.1888	0.875	3.2705	0.9	3.3062	0.95	3.4123	111	2.9489	2.0049
99	0.05	2.7104	0.1	2.7639	0.125	2.7842	0.2	2.8338	0.25	2.8627	0.5	2.9921	0.75	3.1547	0.8	3.201	0.875	3.2978	0.9	3.3437	0.95	3.4779	111	2.9334	1.9876
100	0.05	2.7098	0.1	2.763	0.125	2.783	0.2	2.8331	0.25	2.862	0.5	2.9923	0.75	3.1659	0.8	3.2196	0.875	3.3428	0.9	3.4062	0.95	3.5992	111	2.9299	1.96985
101	0.05	2.7143	0.1	2.7678	0.125	2.7883	0.2	2.839	0.25	2.8683	0.5	2.9997	0.75	3.1806	0.8	3.2423	0.875	3.4044	0.9	3.4969	0.95	3.7494	111	2.9289	1.95255
102	0.05	2.7247	0.1	2.7792	0.125	2.7999	0.2	2.8522	0.25	2.8821	0.5	3.0163	0.75	3.2032	0.8	3.2702	0.875	3.474	0.9	3.5973	0.95	3.8979	111	2.9415	1.9107
103	0.05	2.7408	0.1	2.797	0.125	2.8183	0.2	2.8721	0.25	2.9031	0.5	3.0422	0.75	3.2359	0.8	3.3069	0.875	3.5424	0.9	3.6881	0.95	4.0135	111	2.964	1.84818
104	0.05	2.7628	0.1	2.8214	0.125	2.8433	0.2	2.8991	0.25	2.9312	0.5	3.0769	0.75	3.2796	0.8	3.3535	0.875	3.5975	0.9	3.7452	0.95	4.079	111	2.9969	1.7748
105	0.05	2.7908	0.1	2.8519	0.125	2.8753	0.2	2.9339	0.25	2.9676	0.5	3.1198	0.75	3.3333	0.8	3.4097	0.875	3.6365	0.9	3.7634	0.95	4.0908	111	3.0434	1.68288
106	0.05	2.8249	0.1	2.89	0.125	2.9142	0.2	2.9765	0.25	3.0119	0.5	3.1724	0.75	3.3954	0.8	3.4713	0.875	3.664	0.9	3.7582	0.95	4.0491	111	3.093	1.58958
107	0.05	2.8654	0.1	2.9341	0.125	2.9606	0.2	3.0265	0.25	3.064	0.5	3.2343	0.75	3.4604	0.8	3.5301	0.875	3.684	0.9	3.7579	0.95	3.9878	111	3.1499	1.49774
108	0.05	2.9122	0.1	2.9855	0.125	3.0143	0.2	3.084	0.25	3.1241	0.5	3.3014	0.75	3.5224	0.8	3.5849	0.875	3.7141	0.9	3.7764	0.95	3.9557	111	3.217	1.43628
109	0.05	2.9643	0.1	3.0422	0.125	3.0722	0.2	3.1455	0.25	3.1871	0.5	3.3694	0.75	3.5852	0.8	3.6475	0.875	3.7665	0.9	3.8204	0.95	3.9777	111	3.301	1.40296
110	0.05	3.0146	0.1	3.0963	0.125	3.1279	0.2	3.2053	0.25	3.249	0.5	3.4397	0.75	3.6621	0.8	3.7245	0.875	3.8462	0.9	3.9002	0.95	4.0649	111	3.3697	1.34194
111	0.05	3.0535	0.1	3.1442	0.125	3.1788	0.2	3.2644	0.25	3.3116	0.5	3.5193	0.75	3.7586	0.8	3.8264	0.875	3.9617	0.9	4.0225	0.95	4.2066	111	3.4542	1.23733
112	0.05	3.0835	0.1	3.191	0.125	3.23	0.2	3.3274	0.25	3.3819	0.5	3.6136	0.75	3.8821	0.8	3.9568	0.875	4.1086	0.9	4.1774	0.95	4.3842	111	3.5377	1.11137
113	0.05	3.1149	0.1	3.2408	0.125	3.2868	0.2	3.4013	0.25	3.4636	0.5	3.7267	0.75	4.0263	0.8	4.109	0.875	4.2778	0.9	4.3556	0.95	4.5866	111	3.6542	0.982566
114	0.05	3.1604	0.1	3.3033	0.125	3.3584	0.2	3.4909	0.25	3.5611	0.5	3.8575	0.75	4.1866	0.8	4.2788	0.875	4.4646	0.9	4.5521	0.95	4.8075	111	3.7918	0.881931
115	0.05	3.2323	0.1	3.3904	0.125	3.452	0.2	3.6002	0.25	3.6778	0.5	4.0027	0.75	4.362	0.8	4.4625	0.875	4.6669	0.9	4.763	0.95	5.0484	111	3.9349	0.809277
116	0.05	3.3398	0.1	3.5086	0.125	3.5727	0.2	3.7306	0.25	3.814	0.5	4.1613	0.75	4.5507	0.8	4.6595	0.875	4.885	0.9	4.989	0.95	5.3043	111	4.0868	0.752474
117	0.05	3.4864	0.1	3.6573	0.125	3.7234	0.2	3.8824	0.25	3.9691	0.5	4.3345	0.75	4.7527	0.8	4.8701	0.875	5.1152	0.9	5.228	0.95	5.5794	111	4.2396	0.707728
118	0.05	3.666	0.1	3.833	0.125	3.9	0.2	4.057	0.25	4.1435	0.5	4.523	0.75	4.968	0.8	5.094	0.875	5.3575	0.9	5.4815	0.95	5.866	111	4.4055	0.676354
119	0.05	3.865	0.1	4.031	0.125	4.094	0.2	4.25	0.25	4.338	0.5	4.731	0.75	5.2015	0.8	5.334	0.875	5.618	0.9	5.7525	0.95	6.1695	111	4.594	0.646658
120	0.05	4.061	0.1	4.232	0.125	4.298	0.2	4.4575	0.25	4.547	0.5	4.9565	0.75	5.458	0.8	5.6	0.875	5.904	0.9	6.0485	0.95	6.4945	111	4.81	0.619711
121	0.05	4.243	0.1	4.4245	0.125	4.496	0.2	4.665	0.25	4.76	0.5	5.197	0.75	5.736	0.8	5.8925	0.875	6.222	0.9	6.382	0.95	6.8555	111	5.0115	0.582101
122	0.05	4.4135	0.1	4.6055	0.125	4.6805	0.2	4.863	0.25	4.967	0.5	5.441	0.75	6.0325	0.8	6.208	0.875	6.573	0.9	6.743	0.95	7.27	111	5.266	0.536055
123	0.05	4.57	0.1	4.7735	0.125	4.853	0.2	5.0475	0.25	5.1605	0.5	5.6765	0.75	6.3355	0.8	6.5325	0.875	6.9405	0.9	7.133	0.95	7.7175	111	5.406	0.492152
124	0.05	4.7195	0.1	4.932	0.125	5.0165	0.2	5.22	0.25	5.3395	0.5	5.8925	0.75	6.622	0.8	6.8415	0.875	7.299	0.9	7.515	0.95	8.1665	111	5.589	0.460802
125	0.05	4.8595	0.1	5.0805	0.125	5.168	0.2	5.3825	0.25	5.507	0.5	6.0905	0.75	6.879	0.8	7.12	0.875	7.622	0.9	7.8525	0.95	8.567	111	5.757	0.438148
126	0.05	4.986	0.1	5.2185	0.125	5.3065	0.2	5.5325	0.25	5.6625	0.5	6.2705	0.75	7.0955	0.8	7.3465	0.875	7.8785	0.9	8.1315	0.95	8.8795	111	5.9365	0.421538
127	0.05	5.1035	0.1	5.342	0.125	5.434	0.2	5.6665	0.25	5.8025	0.5	6.428	0.75	7.2715	0.8	7.528	0.875	8.071	0.9	8.3325	0.95	9.094	111	6.09	0.4095
128	0.05	5.203	0.1	5.45	0.125	5.5435	0.2	5.783	0.25	5.9225	0.5	6.56	0.75	7.41	0.8	7.6675	0.875	8.209	0.9	8.465	0.95	9.219	111	6.244	0.40065
129	0.05	5.28	0.1	5.5335	0.125	5.6305	0.2	5.876	0.25	6.02	0.5	6.669	0.75	7.519	0.8	7.77	0.875	8.2985	0.9	8.5445	0.95	9.2955	111	6.3515	0.39363
130	0.05	5.331	0.1	5.592	0.125	5.693	0.2	5.944	0.25	6.092	0.5	6.7545	0.75	7.605	0.8	7.8495	0.875	8.364	0.9	8.605	0.95	9.344	111	6.4195	0.384378
131	0.05	5.355	0.1	5.628	0.125	5.733	0.2	5.993	0.25	6.142	0.5	6.82	0.75	7.672	0.8	7.914	0.875	8.417	0.9	8.654	0.95	9.39	111	6.513	0.375696
132	0.05	5.365	0.1	5.65	0.125	5.758	0.2	6.028	0.25	6.181	0.5	6.872	0.75	7.729	0.8	7.971	0.875	8.473	0.9	8.707	0.95	9.443	111	6.591	0.369217
133	0.05	5.371	0.1	5.67	0.125	5.78	0.2	6.056	0.25	6.213	0.5	6.916	0.75	7.777	0.8	8.027	0.875	8.525	0.9	8.756	0.95	9.5	111	6.651	0.363265
134	0.05	5.395	0.1	5.695	0.125	5.805	0.2	6.084	0.25	6.243	0.5	6.958	0.75	7.824	0.8	8.076	0.875	8.575	0.9	8.814	0.95	9.549	111	6.701	0.357836
135	0.05	5.443	0.1	5.733	0.125	5.842	0.2	6.122	0.25	6.281	0.5	7	0.75	7.872	0.8	8.125	0.875	8.626	0.9	8.865	0.95	9.597	111	6.712	0.354691
136	0.05	5.505	0.1	5.79	0.125	5.896	0.2	6.17	0.25	6.33	0.5	7.048	0.75	7.924	0.8	8.178	0.875	8.683	0.9	8.919	0.95	9.643	111	6.751	0.355395
137	0.05	5.568	0.1	5.851	0.125	5.96	0.2	6.232	0.25	6.39	0.5	7.107	0.75	7.992	0.8	8.244	0.875	8.756	0.9	8.991	0.95	9.69	111	6.741	0.353713
138	0.05	5.613	0.1	5.902	0.125	6.013	0.2	6.292	0.25	6.454	0.5	7.179	0.75	8.082	0.8	8.342	0.875	8.857	0.9	9.096	0.95	9.812	111	6.868	0.351112
139	0.05	5.639	0.1	5.935	0.125	6.048	0.2	6.335	0.25	6.502	0.5	7.253	0.75	8.199	0.8	8.472	0.875	9.028	0.9	9.277	0.95	10.041	111	6.83	0.337811
140	0.05	5.657	0.1	5.955	0.125	6.069	0.2	6.359	0.25	6.528	0.5	7.307	0.75	8.333	0.8	8.637	0.875	9.258	0.9	9.546	0.95	10.452	111	6.838	0.326312
141	0.05	5.674	0.1	5.97	0.125	6.085	0.2	6.374	0.25	6.544	0.5	7.337	0.75	8.446	0.8	8.796	0.875	9.555	0.9	9.923	0.95	11.106	111	6.833	0.322383
142	0.05	5.695	0.1	5.99	0.125	6.1	0.2	6.388	0.25	6.554	0.5	7.347	0.75	8.515	0.8	8.923	0.875	9.873	0.9	10.397	0.95	12.043	111	6.842	0.322875
143	0.05	5.719	0.1	6.01	0.125	6.1225	0.2	6.403	0.25	6.5645	0.5	7.3495	0.75	8.5385	0.8	8.9805	0.875	10.2005	0.9	10.969	0.95	13.0095	111	6.8725	0.326747
144	0.05	5.75	0.1	6.038	0.125	6.1485	0.2	6.424	0.25	6.5835	0.5	7.3535	0.75	8.5305	0.8	8.9935	0.875	10.502	0.9	11.5605	0.95	13.8185	111	6.908	0.331874
145	0.05	5.786	0.1	6.071	0.125	6.18	0.2	6.4495	0.25	6.608	0.5	7.363	0.75	8.5105	0.8	8.972	0.875	10.738	0.9	11.9515	0.95	14.3025	111	6.8635	0.339886
146	0.05	5.8305	0.1	6.107	0.125	6.214	0.2	6.481	0.25	6.637	0.5	7.38	0.75	8.4985	0.8	8.948	0.875	10.8135	0.9	12.059	0.95	13.9925	111	6.889	0.346552
147	0.05	5.8795	0.1	6.148	0.125	6.255	0.2	6.5205	0.25	6.6745	0.5	7.406	0.75	8.4995	0.8	8.9355	0.875	10.681	0.9	11.8185	0.95	13.644	111	6.938	0.351824
148	0.05	5.9275	0.1	6.193	0.125	6.3	0.2	6.566	0.25	6.719	0.5	7.4415	0.75	8.5155	0.8	8.931	0.875	10.3555	0.9	11.3075	0.95	13.3995	111	6.9685	0.356347
149	0.05	5.9725	0.1	6.2435	0.125	6.3485	0.2	6.6135	0.25	6.7665	0.5	7.4875	0.75	8.5335	0.8	8.916	0.875	9.99	0.9	10.6545	0.95	12.438	111	7.019	0.356629
150	0.05	6.015	0.1	6.293	0.125	6.4	0.2	6.6645	0.25	6.8175	0.5	7.5355	0.75	8.535	0.8	8.8625	0.875	9.657	0.9	10.0805	0.95	11.443	111	7.1085	0.35688
151	0.05	6.055	0.1	6.337	0.125	6.4445	0.2	6.7115	0.25	6.8665	0.5	7.5745	0.75	8.5055	0.8	8.7885	0.875	9.396	0.9	9.6885	0.95	10.6215	111	7.1405	0.363719
152	0.05	6.0775	0.1	6.365	0.125	6.4745	0.2	6.744	0.25	6.898	0.5	7.5965	0.75	8.4645	0.8	8.7125	0.875	9.2185	0.9	9.4515	0.95	10.155	111	7.228	0.365872
153	0.05	6.0605	0.1	6.3585	0.125	6.4725	0.2	6.748	0.25	6.906	0.5	7.6005	0.75	8.4445	0.8	8.6785	0.875	9.1505	0.9	9.3655	0.95	9.9955	111	7.2965	0.367154
154	0.05	5.997	0.1	6.3125	0.125	6.431	0.2	6.7265	0.25	6.8885	0.5	7.6085	0.75	8.4755	0.8	8.7155	0.875	9.1995	0.9	9.4145	0.95	10.07	111	7.292	0.355549
155	0.05	5.883	0.1	6.229	0.125	6.363	0.2	6.688	0.25	6.865	0.5	7.641	0.75	8.571	0.8	8.828	0.875	9.344	0.9	9.585	0.95	10.299	111	7.338	0.330213
156	0.05	5.745	0.1	6.137	0.125	6.288	0.2	6.652	0.25	6.853	0.5	7.703	0.75	8.715	0.8	8.994	0.875	9.565	0.9	9.82	0.95	10.611	111	7.41	0.303669
157	0.05	5.618	0.1	6.059	0.125	6.229	0.2	6.633	0.25	6.855	0.5	7.79	0.75	8.9	0.8	9.202	0.875	9.821	0.9	10.108	0.95	10.961	111	7.456	0.276319
158	0.05	5.519	0.1	6.006	0.125	6.193	0.2	6.634	0.25	6.878	0.5	7.899	0.75	9.106	0.8	9.431	0.875	10.103	0.9	10.412	0.95	11.355	111	7.639	0.250841
