# Supplementary material for: Time-varying asymmetry and tail thickness in long series of daily financial returns
Source: publisher site journal article supplement (doi:10.1515/snde-2017-0071), 2018-10-02
Supplement: Supplementary file 319 [file thres_ni2.xlsx]

## Sheet: 1
	Var1	Var2	Var3	Var4	Var5	Var6	Var7	Var8	Var9	Var10	Var11	Var12	Var13	Var14	Var15	Var16	Var17	Var18	Var19	Var20	Var21	Var22	Var23	Var24	Var25
1	0	0	0	0	0	0	0	0	0	0	0	0	0	0	0	0	0	0	0	0	0	0	0	0	0
2	0.05	4.0985	0.1	4.341	0.125	4.4395	0.2	4.678	0.25	4.8205	0.5	5.4525	0.75	6.242	0.8	6.467	0.875	6.92	0.9	7.1345	0.95	7.8425	111	5.28	0.416163
3	0.05	4.136	0.1	4.3775	0.125	4.4735	0.2	4.707	0.25	4.8415	0.5	5.447	0.75	6.1705	0.8	6.3695	0.875	6.758	0.9	6.9375	0.95	7.486	111	5.333	0.43242
4	0.05	4.1715	0.1	4.4075	0.125	4.499	0.2	4.723	0.25	4.8525	0.5	5.4305	0.75	6.0995	0.8	6.283	0.875	6.6325	0.9	6.7855	0.95	7.2325	111	5.282	0.448662
5	0.05	4.1825	0.1	4.413	0.125	4.503	0.2	4.718	0.25	4.843	0.5	5.4115	0.75	6.0535	0.8	6.226	0.875	6.5515	0.9	6.6905	0.95	7.094	111	5.3285	0.453309
6	0.05	4.165	0.1	4.3895	0.125	4.477	0.2	4.6965	0.25	4.8215	0.5	5.4035	0.75	6.036	0.8	6.2055	0.875	6.5225	0.9	6.665	0.95	7.0625	111	5.3795	0.438348
7	0.05	4.1105	0.1	4.3385	0.125	4.4305	0.2	4.6675	0.25	4.803	0.5	5.419	0.75	6.061	0.8	6.2275	0.875	6.5415	0.9	6.679	0.95	7.069	111	5.4845	0.421153
8	0.05	4.0345	0.1	4.277	0.125	4.378	0.2	4.6495	0.25	4.8025	0.5	5.4635	0.75	6.103	0.8	6.2675	0.875	6.577	0.9	6.7135	0.95	7.0935	111	5.568	0.415917
9	0.05	3.9475	0.1	4.228	0.125	4.342	0.2	4.6475	0.25	4.8285	0.5	5.522	0.75	6.159	0.8	6.3205	0.875	6.624	0.9	6.757	0.95	7.133	111	5.6685	0.413728
10	0.05	3.8955	0.1	4.203	0.125	4.3325	0.2	4.68	0.25	4.88	0.5	5.587	0.75	6.2185	0.8	6.3775	0.875	6.6795	0.9	6.8095	0.95	7.18	111	5.779	0.417803
11	0.05	3.9	0.1	4.222	0.125	4.3605	0.2	4.7395	0.25	4.9445	0.5	5.655	0.75	6.2805	0.8	6.4395	0.875	6.7385	0.9	6.868	0.95	7.236	111	5.7895	0.419217
12	0.05	3.968	0.1	4.2875	0.125	4.432	0.2	4.8195	0.25	5.02	0.5	5.7215	0.75	6.3465	0.8	6.5045	0.875	6.803	0.9	6.9315	0.95	7.294	111	5.751	0.422094
13	0.05	4.0945	0.1	4.403	0.125	4.545	0.2	4.914	0.25	5.1045	0.5	5.786	0.75	6.415	0.8	6.5705	0.875	6.8675	0.9	6.999	0.95	7.361	111	5.7485	0.422137
14	0.05	4.26	0.1	4.564	0.125	4.693	0.2	5.024	0.25	5.1955	0.5	5.8535	0.75	6.4835	0.8	6.64	0.875	6.9385	0.9	7.066	0.95	7.4355	111	5.8945	0.424049
15	0.05	4.4545	0.1	4.741	0.125	4.861	0.2	5.1505	0.25	5.306	0.5	5.922	0.75	6.551	0.8	6.714	0.875	7.011	0.9	7.143	0.95	7.521	111	5.974	0.429911
16	0.05	4.645	0.1	4.917	0.125	5.021	0.2	5.277	0.25	5.4175	0.5	6.005	0.75	6.624	0.8	6.787	0.875	7.093	0.9	7.225	0.95	7.611	111	5.9315	0.447575
17	0.05	4.809	0.1	5.0635	0.125	5.161	0.2	5.395	0.25	5.527	0.5	6.1	0.75	6.7185	0.8	6.8815	0.875	7.1895	0.9	7.324	0.95	7.7165	111	6.019	0.452656
18	0.05	4.928	0.1	5.1755	0.125	5.267	0.2	5.493	0.25	5.62	0.5	6.1955	0.75	6.827	0.8	6.992	0.875	7.3135	0.9	7.456	0.95	7.8645	111	6.09	0.449998
19	0.05	5.0015	0.1	5.2515	0.125	5.3445	0.2	5.5675	0.25	5.6955	0.5	6.2825	0.75	6.9355	0.8	7.1115	0.875	7.4475	0.9	7.606	0.95	8.0555	111	6.202	0.437662
20	0.05	5.0475	0.1	5.2985	0.125	5.3925	0.2	5.621	0.25	5.753	0.5	6.3525	0.75	7.0295	0.8	7.2135	0.875	7.5815	0.9	7.7515	0.95	8.252	111	6.1775	0.425614
21	0.05	5.0785	0.1	5.33	0.125	5.423	0.2	5.6615	0.25	5.7935	0.5	6.4055	0.75	7.1	0.8	7.2945	0.875	7.687	0.9	7.8775	0.95	8.436	111	6.049	0.413408
22	0.05	5.0995	0.1	5.351	0.125	5.444	0.2	5.683	0.25	5.82	0.5	6.4415	0.75	7.157	0.8	7.357	0.875	7.763	0.9	7.962	0.95	8.5595	111	6.2045	0.406339
23	0.05	5.1065	0.1	5.3555	0.125	5.4535	0.2	5.697	0.25	5.8355	0.5	6.462	0.75	7.2015	0.8	7.4055	0.875	7.818	0.9	8.011	0.95	8.627	111	6.1595	0.406655
24	0.05	5.0945	0.1	5.3525	0.125	5.452	0.2	5.7025	0.25	5.844	0.5	6.478	0.75	7.2345	0.8	7.4405	0.875	7.8535	0.9	8.048	0.95	8.6665	111	6.1525	0.402924
25	0.05	5.072	0.1	5.3385	0.125	5.446	0.2	5.7025	0.25	5.8465	0.5	6.492	0.75	7.255	0.8	7.4645	0.875	7.8825	0.9	8.0765	0.95	8.6575	111	6.2325	0.395102
26	0.05	5.0395	0.1	5.3225	0.125	5.432	0.2	5.7035	0.25	5.855	0.5	6.51	0.75	7.279	0.8	7.4865	0.875	7.9085	0.9	8.1005	0.95	8.6625	111	6.299	0.39276
27	0.05	5.0035	0.1	5.311	0.125	5.424	0.2	5.711	0.25	5.865	0.5	6.5335	0.75	7.311	0.8	7.5185	0.875	7.9355	0.9	8.1175	0.95	8.6615	111	6.325	0.388262
28	0.05	4.9765	0.1	5.3095	0.125	5.4335	0.2	5.731	0.25	5.8865	0.5	6.5665	0.75	7.3465	0.8	7.5535	0.875	7.9655	0.9	8.148	0.95	8.6945	111	6.423	0.381923
29	0.05	4.983	0.1	5.334	0.125	5.465	0.2	5.7645	0.25	5.9255	0.5	6.6135	0.75	7.39	0.8	7.603	0.875	8.02	0.9	8.2015	0.95	8.742	111	6.505	0.378753
30	0.05	5.048	0.1	5.392	0.125	5.521	0.2	5.8205	0.25	5.9825	0.5	6.6755	0.75	7.453	0.8	7.6675	0.875	8.0925	0.9	8.276	0.95	8.8125	111	6.5875	0.380452
31	0.05	5.166	0.1	5.4915	0.125	5.6115	0.2	5.9065	0.25	6.0705	0.5	6.7585	0.75	7.537	0.8	7.753	0.875	8.1845	0.9	8.372	0.95	8.9115	111	6.6805	0.384417
32	0.05	5.3195	0.1	5.628	0.125	5.742	0.2	6.0265	0.25	6.1865	0.5	6.873	0.75	7.6555	0.8	7.872	0.875	8.3055	0.9	8.4965	0.95	9.0455	111	6.8195	0.387171
33	0.05	5.503	0.1	5.795	0.125	5.904	0.2	6.18	0.25	6.3355	0.5	7.0175	0.75	7.8135	0.8	8.04	0.875	8.4805	0.9	8.6725	0.95	9.2315	111	6.912	0.386015
34	0.05	5.6805	0.1	5.9695	0.125	6.0825	0.2	6.359	0.25	6.5145	0.5	7.2025	0.75	8.026	0.8	8.2615	0.875	8.7275	0.9	8.933	0.95	9.538	111	6.954	0.37279
35	0.05	5.832	0.1	6.1335	0.125	6.2515	0.2	6.5395	0.25	6.705	0.5	7.4225	0.75	8.305	0.8	8.559	0.875	9.068	0.9	9.303	0.95	10.026	111	7.156	0.358149
36	0.05	5.97	0.1	6.2875	0.125	6.4075	0.2	6.717	0.25	6.889	0.5	7.662	0.75	8.6415	0.8	8.9305	0.875	9.5345	0.9	9.8275	0.95	10.7675	111	7.338	0.331005
37	0.05	6.1085	0.1	6.4425	0.125	6.57	0.2	6.8895	0.25	7.0715	0.5	7.904	0.75	9.018	0.8	9.374	0.875	10.1365	0.9	10.534	0.95	11.924	111	7.508	0.307143
38	0.05	6.2545	0.1	6.606	0.125	6.7405	0.2	7.071	0.25	7.2665	0.5	8.1535	0.75	9.4065	0.8	9.849	0.875	10.8855	0.9	11.432	0.95	13.5495	111	7.692	0.289845
39	0.05	6.4155	0.1	6.786	0.125	6.927	0.2	7.2735	0.25	7.4765	0.5	8.422	0.75	9.81	0.8	10.341	0.875	11.709	0.9	12.5295	0.95	14.034	111	7.856	0.269357
40	0.05	6.595	0.1	6.979	0.125	7.131	0.2	7.4985	0.25	7.711	0.5	8.7205	0.75	10.2435	0.8	10.853	0.875	12.595	0.9	13.693	0.95	15.127	111	8.153	0.252726
41	0.05	6.788	0.1	7.192	0.125	7.3555	0.2	7.7465	0.25	7.973	0.5	9.056	0.75	10.742	0.8	11.4075	0.875	13.4525	0.9	14.767	0.95	16.3305	111	8.384	0.237124
42	0.05	6.995	0.1	7.431	0.125	7.604	0.2	8.019	0.25	8.263	0.5	9.436	0.75	11.295	0.8	12.018	0.875	14.23	0.9	15.568	0.95	17.648	111	8.652	0.220511
43	0.05	7.223	0.1	7.69	0.125	7.875	0.2	8.324	0.25	8.586	0.5	9.864	0.75	11.911	0.8	12.689	0.875	14.858	0.9	16.08	0.95	19.07	111	9.011	0.202455
44	0.05	7.472	0.1	7.975	0.125	8.17	0.2	8.657	0.25	8.944	0.5	10.353	0.75	12.573	0.8	13.38	0.875	15.354	0.9	16.368	0.95	20.012	111	9.395	0.18499
45	0.05	7.744	0.1	8.284	0.125	8.492	0.2	9.028	0.25	9.341	0.5	10.885	0.75	13.26	0.8	14.055	0.875	15.763	0.9	16.631	0.95	19.674	111	9.755	0.168564
46	0.05	8.044	0.1	8.621	0.125	8.848	0.2	9.434	0.25	9.774	0.5	11.462	0.75	13.886	0.8	14.635	0.875	16.2	0.9	16.979	0.95	19.385	111	10.188	0.153674
47	0.05	8.361	0.1	8.993	0.125	9.235	0.2	9.871	0.25	10.239	0.5	12.047	0.75	14.471	0.8	15.203	0.875	16.692	0.9	17.385	0.95	19.448	111	10.802	0.14188
48	0.05	8.71	0.1	9.396	0.125	9.651	0.2	10.326	0.25	10.72	0.5	12.621	0.75	15.094	0.8	15.83	0.875	17.301	0.9	17.937	0.95	19.794	111	11.462	0.134472
49	0.05	9.076	0.1	9.803	0.125	10.079	0.2	10.783	0.25	11.193	0.5	13.189	0.75	15.772	0.8	16.523	0.875	17.973	0.9	18.648	0.95	20.654	111	12.041	0.127978
50	0.05	9.446	0.1	10.21	0.125	10.502	0.2	11.237	0.25	11.674	0.5	13.804	0.75	16.53	0.8	17.323	0.875	18.936	0.9	19.694	0.95	22.025	111	12.301	0.119434
51	0.05	9.818	0.1	10.62	0.125	10.938	0.2	11.712	0.25	12.171	0.5	14.477	0.75	17.449	0.8	18.33	0.875	20.152	0.9	21.007	0.95	23.594	111	12.861	0.11169
52	0.05	10.218	0.1	11.082	0.125	11.413	0.2	12.242	0.25	12.724	0.5	15.23	0.75	18.523	0.8	19.495	0.875	21.508	0.9	22.435	0.95	25.273	111	12.793	0.10375
53	0.05	10.686	0.1	11.615	0.125	11.963	0.2	12.847	0.25	13.375	0.5	16.076	0.75	19.661	0.8	20.744	0.875	22.927	0.9	23.926	0.95	27.022	111	13.735	0.095357
54	0.05	11.223	0.1	12.23	0.125	12.608	0.2	13.562	0.25	14.134	0.5	17.013	0.75	20.872	0.8	22.043	0.875	24.372	0.9	25.431	0.95	28.823	111	14.825	0.0896511
55	0.05	11.843	0.1	12.922	0.125	13.343	0.2	14.374	0.25	14.986	0.5	18.037	0.75	22.142	0.8	23.375	0.875	25.81	0.9	26.955	0.95	30.61	111	15.896	0.0845119
56	0.05	12.509	0.1	13.681	0.125	14.135	0.2	15.257	0.25	15.916	0.5	19.148	0.75	23.447	0.8	24.717	0.875	27.249	0.9	28.46	0.95	32.372	111	16.873	0.0799113
57	0.05	13.165	0.1	14.466	0.125	14.955	0.2	16.164	0.25	16.877	0.5	20.313	0.75	24.776	0.8	26.093	0.875	28.699	0.9	29.944	0.95	34.077	111	17.828	0.0751625
58	0.05	13.808	0.1	15.209	0.125	15.747	0.2	17.035	0.25	17.793	0.5	21.458	0.75	26.097	0.8	27.46	0.875	30.139	0.9	31.411	0.95	35.694	111	18.693	0.0703308
59	0.05	14.417	0.1	15.889	0.125	16.452	0.2	17.843	0.25	18.639	0.5	22.501	0.75	27.351	0.8	28.76	0.875	31.534	0.9	32.857	0.95	37.195	111	19.538	0.0665166
60	0.05	14.99	0.1	16.495	0.125	17.081	0.2	18.523	0.25	19.36	0.5	23.389	0.75	28.462	0.8	29.901	0.875	32.764	0.9	34.125	0.95	38.555	111	20.622	0.063638
61	0.05	15.487	0.1	17.013	0.125	17.611	0.2	19.091	0.25	19.947	0.5	24.072	0.75	29.291	0.8	30.764	0.875	33.714	0.9	35.138	0.95	39.64	111	21.404	0.0618921
62	0.05	15.914	0.1	17.421	0.125	18.03	0.2	19.503	0.25	20.356	0.5	24.51	0.75	29.772	0.8	31.264	0.875	34.298	0.9	35.736	0.95	40.24	111	21.988	0.0614488
63	0.05	16.233	0.1	17.706	0.125	18.296	0.2	19.738	0.25	20.573	0.5	24.68	0.75	29.879	0.8	31.398	0.875	34.496	0.9	35.925	0.95	40.344	111	22.626	0.0621888
64	0.05	16.368	0.1	17.778	0.125	18.338	0.2	19.737	0.25	20.566	0.5	24.536	0.75	29.685	0.8	31.162	0.875	34.318	0.9	35.785	0.95	40.175	111	22.781	0.0648103
65	0.05	16.21	0.1	17.556	0.125	18.09	0.2	19.483	0.25	20.291	0.5	24.132	0.75	29.227	0.8	30.717	0.875	33.906	0.9	35.382	0.95	39.783	111	21.547	0.0666497
66	0.05	15.692	0.1	17.02	0.125	17.556	0.2	18.906	0.25	19.709	0.5	23.539	0.75	28.676	0.8	30.151	0.875	33.314	0.9	34.769	0.95	39.175	111	20.974	0.0672169
67	0.05	14.741	0.1	16.153	0.125	16.699	0.2	18.118	0.25	18.962	0.5	22.865	0.75	28.023	0.8	29.474	0.875	32.556	0.9	33.915	0.95	38.246	111	20.666	0.0668315
68	0.05	13.42	0.1	15.028	0.125	15.667	0.2	17.257	0.25	18.156	0.5	22.179	0.75	27.229	0.8	28.636	0.875	31.561	0.9	32.876	0.95	37.059	111	20.202	0.0642844
69	0.05	11.955	0.1	13.81	0.125	14.582	0.2	16.412	0.25	17.383	0.5	21.411	0.75	26.26	0.8	27.603	0.875	30.368	0.9	31.628	0.95	35.604	111	20.067	0.0644515
70	0.05	10.617	0.1	12.583	0.125	13.546	0.2	15.64	0.25	16.636	0.5	20.537	0.75	25.13	0.8	26.4	0.875	28.986	0.9	30.2	0.95	33.96	111	19.765	0.0671341
71	0.05	9.598	0.1	11.465	0.125	12.596	0.2	14.885	0.25	15.87	0.5	19.561	0.75	23.857	0.8	25.047	0.875	27.484	0.9	28.589	0.95	32.13	111	18.623	0.0708569
72	0.05	9.13	0.1	10.605	0.125	11.769	0.2	14.116	0.25	15.035	0.5	18.495	0.75	22.492	0.8	23.593	0.875	25.848	0.9	26.877	0.95	30.182	111	17.419	0.075661
73	0.05	8.759	0.1	10.016	0.125	11.107	0.2	13.312	0.25	14.16	0.5	17.374	0.75	21.057	0.8	22.074	0.875	24.135	0.9	25.1	0.95	28.124	111	16.306	0.0813984
74	0.05	8.299	0.1	9.652	0.125	10.594	0.2	12.503	0.25	13.267	0.5	16.222	0.75	19.598	0.8	20.527	0.875	22.382	0.9	23.28	0.95	26.043	111	15.265	0.088142
75	0.05	8.153	0.1	9.503	0.125	10.224	0.2	11.715	0.25	12.393	0.5	15.069	0.75	18.133	0.8	18.976	0.875	20.655	0.9	21.465	0.95	24.002	111	14.1	0.0963799
76	0.05	8.273	0.1	9.422	0.125	9.898	0.2	11.005	0.25	11.555	0.5	13.939	0.75	16.7	0.8	17.457	0.875	18.971	0.9	19.689	0.95	22.004	111	12.633	0.107396
77	0.05	8.42	0.1	9.26	0.125	9.59	0.2	10.384	0.25	10.814	0.5	12.858	0.75	15.315	0.8	15.983	0.875	17.36	0.9	18.007	0.95	20.054	111	11.531	0.12714
78	0.05	8.384	0.1	9.004	0.125	9.244	0.2	9.835	0.25	10.185	0.5	11.875	0.75	14.014	0.8	14.61	0.875	15.83	0.9	16.416	0.95	18.213	111	10.614	0.152521
79	0.05	8.101	0.1	8.621	0.125	8.812	0.2	9.311	0.25	9.6	0.5	11.024	0.75	12.85	0.8	13.364	0.875	14.438	0.9	14.942	0.95	16.518	111	9.943	0.180176
80	0.05	7.646	0.1	8.106	0.125	8.286	0.2	8.738	0.25	9.005	0.5	10.271	0.75	11.845	0.8	12.292	0.875	13.227	0.9	13.662	0.95	15.018	111	9.552	0.200331
81	0.05	7.122	0.1	7.548	0.125	7.714	0.2	8.13	0.25	8.378	0.5	9.553	0.75	10.982	0.8	11.386	0.875	12.21	0.9	12.584	0.95	13.77	111	8.887	0.215649
82	0.05	6.617	0.1	7.003	0.125	7.15	0.2	7.529	0.25	7.755	0.5	8.834	0.75	10.179	0.8	10.561	0.875	11.327	0.9	11.668	0.95	12.729	111	8.189	0.235824
83	0.05	6.156	0.1	6.5005	0.125	6.633	0.2	6.972	0.25	7.174	0.5	8.1465	0.75	9.399	0.8	9.763	0.875	10.487	0.9	10.808	0.95	11.8185	111	7.5965	0.261448
84	0.05	5.738	0.1	6.0485	0.125	6.165	0.2	6.4665	0.25	6.646	0.5	7.515	0.75	8.649	0.8	8.981	0.875	9.649	0.9	9.9525	0.95	10.8895	111	7.0135	0.293095
85	0.05	5.3655	0.1	5.644	0.125	5.748	0.2	6.0165	0.25	6.1755	0.5	6.9425	0.75	7.9405	0.8	8.2335	0.875	8.8215	0.9	9.094	0.95	9.933	111	6.49	0.3326
86	0.05	5.0405	0.1	5.2865	0.125	5.379	0.2	5.6185	0.25	5.76	0.5	6.431	0.75	7.2865	0.8	7.5365	0.875	8.042	0.9	8.27	0.95	8.9855	111	6.0535	0.379104
87	0.05	4.755	0.1	4.972	0.125	5.0562	0.2	5.27	0.25	5.3955	0.5	5.9801	0.75	6.7047	0.8	6.9115	0.875	7.3299	0.9	7.5201	0.95	8.1145	111	5.687	0.434794
88	0.05	4.5035	0.1	4.7002	0.125	4.7744	0.2	4.9636	0.25	5.0734	0.5	5.5821	0.75	6.194	0.8	6.3687	0.875	6.7142	0.9	6.8685	0.95	7.3531	111	5.3436	0.501935
89	0.05	4.2838	0.1	4.4598	0.125	4.5271	0.2	4.6937	0.25	4.7913	0.5	5.2354	0.75	5.7573	0.8	5.9037	0.875	6.1945	0.9	6.3222	0.95	6.7201	111	5.0269	0.579365
90	0.05	4.0896	0.1	4.2476	0.125	4.3075	0.2	4.4584	0.25	4.5461	0.5	4.9379	0.75	5.3937	0.8	5.5207	0.875	5.769	0.9	5.8799	0.95	6.212	111	4.7857	0.651092
91	0.05	3.9219	0.1	4.0638	0.125	4.1191	0.2	4.258	0.25	4.3374	0.5	4.6888	0.75	5.0949	0.8	5.2054	0.875	5.4271	0.9	5.525	0.95	5.8112	111	4.5628	0.728318
92	0.05	3.7822	0.1	3.9135	0.125	3.9639	0.2	4.0929	0.25	4.1668	0.5	4.4861	0.75	4.8518	0.8	4.9521	0.875	5.146	0.9	5.2362	0.95	5.4894	111	4.3915	0.797434
93	0.05	3.6734	0.1	3.7955	0.125	3.8424	0.2	3.9629	0.25	4.0305	0.5	4.3236	0.75	4.6577	0.8	4.7488	0.875	4.9251	0.9	5.0036	0.95	5.2349	111	4.2291	0.871293
94	0.05	3.5941	0.1	3.7092	0.125	3.7527	0.2	3.8643	0.25	3.9259	0.5	4.1975	0.75	4.5063	0.8	4.5891	0.875	4.7508	0.9	4.8234	0.95	5.0364	111	4.1148	0.946451
95	0.05	3.5353	0.1	3.6461	0.125	3.6883	0.2	3.7922	0.25	3.8509	0.5	4.1056	0.75	4.3964	0.8	4.4727	0.875	4.622	0.9	4.6899	0.95	4.8866	111	4.0282	1.01057
96	0.05	3.4911	0.1	3.5984	0.125	3.6391	0.2	3.7415	0.25	3.7976	0.5	4.0439	0.75	4.3263	0.8	4.4001	0.875	4.5445	0.9	4.608	0.95	4.7945	111	3.9562	1.04064
97	0.05	3.4546	0.1	3.5602	0.125	3.6002	0.2	3.7014	0.25	3.7568	0.5	4.0045	0.75	4.2933	0.8	4.3703	0.875	4.5186	0.9	4.5855	0.95	4.7803	111	3.915	1.03367
98	0.05	3.4274	0.1	3.531	0.125	3.5707	0.2	3.6704	0.25	3.7257	0.5	3.9779	0.75	4.2892	0.8	4.3751	0.875	4.5468	0.9	4.6263	0.95	4.8657	111	3.8975	1.01211
99	0.05	3.412	0.1	3.5141	0.125	3.554	0.2	3.6511	0.25	3.707	0.5	3.9619	0.75	4.2985	0.8	4.3995	0.875	4.6199	0.9	4.7282	0.95	5.0627	111	3.851	0.998197
100	0.05	3.4081	0.1	3.5098	0.125	3.5496	0.2	3.6458	0.25	3.7022	0.5	3.9587	0.75	4.3142	0.8	4.4327	0.875	4.7324	0.9	4.8971	0.95	5.3601	111	3.8445	0.992395
101	0.05	3.4156	0.1	3.5184	0.125	3.5584	0.2	3.6561	0.25	3.7119	0.5	3.9737	0.75	4.3402	0.8	4.4727	0.875	4.8705	0.9	5.1194	0.95	5.696	111	3.8528	0.979584
102	0.05	3.4339	0.1	3.5391	0.125	3.5803	0.2	3.6798	0.25	3.7375	0.5	4.0054	0.75	4.3845	0.8	4.5245	0.875	5.0246	0.9	5.3466	0.95	6.0168	111	3.8788	0.953327
103	0.05	3.4631	0.1	3.5726	0.125	3.6153	0.2	3.7185	0.25	3.7787	0.5	4.0555	0.75	4.4491	0.8	4.5966	0.875	5.1671	0.9	5.5321	0.95	6.271	111	3.9239	0.923319
104	0.05	3.5038	0.1	3.6195	0.125	3.6636	0.2	3.7721	0.25	3.8349	0.5	4.1243	0.75	4.533	0.8	4.6902	0.875	5.2737	0.9	5.6452	0.95	6.4177	111	3.9838	0.886144
105	0.05	3.5569	0.1	3.6783	0.125	3.7256	0.2	3.841	0.25	3.9073	0.5	4.2113	0.75	4.6396	0.8	4.8035	0.875	5.3354	0.9	5.6618	0.95	6.4409	111	4.0587	0.844156
106	0.05	3.6232	0.1	3.7528	0.125	3.8029	0.2	3.9253	0.25	3.9962	0.5	4.3169	0.75	4.7645	0.8	4.9275	0.875	5.3744	0.9	5.6214	0.95	6.3382	111	4.1544	0.799409
107	0.05	3.7016	0.1	3.842	0.125	3.8939	0.2	4.026	0.25	4.1012	0.5	4.4396	0.75	4.9	0.8	5.0526	0.875	5.4123	0.9	5.5895	0.95	6.1699	111	4.2674	0.756558
108	0.05	3.7946	0.1	3.9448	0.125	4.0009	0.2	4.1418	0.25	4.2212	0.5	4.5769	0.75	5.0318	0.8	5.1682	0.875	5.4608	0.9	5.6032	0.95	6.036	111	4.4042	0.719425
109	0.05	3.8974	0.1	4.0583	0.125	4.1188	0.2	4.267	0.25	4.3509	0.5	4.718	0.75	5.165	0.8	5.2936	0.875	5.5499	0.9	5.6706	0.95	6.0405	111	4.5587	0.696344
110	0.05	4.0037	0.1	4.1738	0.125	4.237	0.2	4.3922	0.25	4.4797	0.5	4.8638	0.75	5.3187	0.8	5.4438	0.875	5.6974	0.9	5.8145	0.95	6.1722	111	4.683	0.67213
111	0.05	4.0972	0.1	4.2789	0.125	4.348	0.2	4.5165	0.25	4.6103	0.5	5.0218	0.75	5.5065	0.8	5.6415	0.875	5.912	0.9	6.0353	0.95	6.4105	111	4.8737	0.623752
112	0.05	4.1787	0.1	4.379	0.125	4.4569	0.2	4.6475	0.25	4.7541	0.5	5.2076	0.75	5.7392	0.8	5.8876	0.875	6.1864	0.9	6.3222	0.95	6.7332	111	5.0642	0.566576
113	0.05	4.26	0.1	4.4885	0.125	4.5795	0.2	4.801	0.25	4.921	0.5	5.4255	0.75	6.0145	0.8	6.1785	0.875	6.5095	0.9	6.6635	0.95	7.1225	111	5.247	0.509459
114	0.05	4.3665	0.1	4.6295	0.125	4.732	0.2	4.9815	0.25	5.1155	0.5	5.6775	0.75	6.3275	0.8	6.5075	0.875	6.8775	0.9	7.049	0.95	7.562	111	5.49	0.457899
115	0.05	4.527	0.1	4.8175	0.125	4.9255	0.2	5.197	0.25	5.346	0.5	5.962	0.75	6.673	0.8	6.8735	0.875	7.278	0.9	7.469	0.95	8.0415	111	5.746	0.419171
116	0.05	4.753	0.1	5.056	0.125	5.17	0.2	5.4525	0.25	5.6135	0.5	6.2765	0.75	7.0485	0.8	7.2685	0.875	7.7105	0.9	7.922	0.95	8.5685	111	6.01	0.388959
117	0.05	5.0405	0.1	5.351	0.125	5.469	0.2	5.7565	0.25	5.921	0.5	6.6205	0.75	7.4545	0.8	7.6915	0.875	8.1735	0.9	8.403	0.95	9.127	111	6.3005	0.36655
118	0.05	5.378	0.1	5.691	0.125	5.814	0.2	6.103	0.25	6.27	0.5	7	0.75	7.894	0.8	8.147	0.875	8.665	0.9	8.92	0.95	9.71	111	6.633	0.352204
119	0.05	5.736	0.1	6.059	0.125	6.178	0.2	6.481	0.25	6.65	0.5	7.424	0.75	8.376	0.8	8.648	0.875	9.207	0.9	9.478	0.95	10.341	111	7.046	0.330454
120	0.05	6.094	0.1	6.425	0.125	6.553	0.2	6.868	0.25	7.049	0.5	7.883	0.75	8.915	0.8	9.21	0.875	9.823	0.9	10.11	0.95	11.03	111	7.433	0.30565
121	0.05	6.431	0.1	6.782	0.125	6.919	0.2	7.254	0.25	7.447	0.5	8.36	0.75	9.506	0.8	9.836	0.875	10.516	0.9	10.831	0.95	11.838	111	7.84	0.280013
122	0.05	6.742	0.1	7.119	0.125	7.267	0.2	7.622	0.25	7.834	0.5	8.833	0.75	10.124	0.8	10.5	0.875	11.28	0.9	11.646	0.95	12.786	111	8.244	0.255117
123	0.05	7.032	0.1	7.431	0.125	7.59	0.2	7.971	0.25	8.199	0.5	9.291	0.75	10.73	0.8	11.164	0.875	12.074	0.9	12.498	0.95	13.824	111	8.615	0.234793
124	0.05	7.307	0.1	7.729	0.125	7.895	0.2	8.299	0.25	8.541	0.5	9.718	0.75	11.302	0.8	11.795	0.875	12.819	0.9	13.323	0.95	14.841	111	8.946	0.218791
125	0.05	7.565	0.1	8.007	0.125	8.181	0.2	8.607	0.25	8.864	0.5	10.116	0.75	11.818	0.8	12.35	0.875	13.484	0.9	14.033	0.95	15.758	111	9.221	0.206292
126	0.05	7.798	0.1	8.263	0.125	8.444	0.2	8.892	0.25	9.161	0.5	10.474	0.75	12.267	0.8	12.82	0.875	14.016	0.9	14.605	0.95	16.447	111	9.475	0.197137
127	0.05	8.003	0.1	8.49	0.125	8.676	0.2	9.148	0.25	9.429	0.5	10.794	0.75	12.637	0.8	13.209	0.875	14.413	0.9	15.016	0.95	16.87	111	9.774	0.188541
128	0.05	8.174	0.1	8.68	0.125	8.875	0.2	9.374	0.25	9.662	0.5	11.071	0.75	12.931	0.8	13.504	0.875	14.689	0.9	15.287	0.95	17.126	111	9.974	0.182928
129	0.05	8.304	0.1	8.832	0.125	9.034	0.2	9.553	0.25	9.853	0.5	11.295	0.75	13.163	0.8	13.722	0.875	14.888	0.9	15.464	0.95	17.26	111	10.245	0.179089
130	0.05	8.391	0.1	8.941	0.125	9.155	0.2	9.688	0.25	9.997	0.5	11.467	0.75	13.342	0.8	13.887	0.875	15.046	0.9	15.611	0.95	17.333	111	10.463	0.175301
131	0.05	8.44	0.1	9.011	0.125	9.235	0.2	9.784	0.25	10.101	0.5	11.598	0.75	13.488	0.8	14.028	0.875	15.183	0.9	15.727	0.95	17.393	111	10.667	0.171753
132	0.05	8.465	0.1	9.055	0.125	9.284	0.2	9.855	0.25	10.176	0.5	11.701	0.75	13.609	0.8	14.151	0.875	15.299	0.9	15.837	0.95	17.455	111	10.787	0.167931
133	0.05	8.488	0.1	9.089	0.125	9.321	0.2	9.909	0.25	10.238	0.5	11.785	0.75	13.72	0.8	14.271	0.875	15.408	0.9	15.938	0.95	17.528	111	10.897	0.165057
134	0.05	8.524	0.1	9.132	0.125	9.371	0.2	9.966	0.25	10.3	0.5	11.87	0.75	13.827	0.8	14.385	0.875	15.519	0.9	16.037	0.95	17.636	111	10.952	0.163092
135	0.05	8.579	0.1	9.201	0.125	9.442	0.2	10.037	0.25	10.374	0.5	11.963	0.75	13.928	0.8	14.489	0.875	15.637	0.9	16.16	0.95	17.753	111	11.05	0.161758
136	0.05	8.644	0.1	9.282	0.125	9.524	0.2	10.127	0.25	10.471	0.5	12.072	0.75	14.045	0.8	14.608	0.875	15.768	0.9	16.286	0.95	17.873	111	11.132	0.159262
137	0.05	8.713	0.1	9.358	0.125	9.609	0.2	10.216	0.25	10.573	0.5	12.211	0.75	14.209	0.8	14.781	0.875	15.942	0.9	16.475	0.95	18.054	111	11.285	0.155028
138	0.05	8.761	0.1	9.415	0.125	9.672	0.2	10.299	0.25	10.662	0.5	12.367	0.75	14.432	0.8	15.02	0.875	16.22	0.9	16.761	0.95	18.395	111	11.516	0.148759
139	0.05	8.787	0.1	9.453	0.125	9.712	0.2	10.349	0.25	10.725	0.5	12.505	0.75	14.699	0.8	15.348	0.875	16.647	0.9	17.252	0.95	18.994	111	11.699	0.144003
140	0.05	8.805	0.1	9.473	0.125	9.736	0.2	10.381	0.25	10.764	0.5	12.597	0.75	14.982	0.8	15.707	0.875	17.222	0.9	17.916	0.95	20.013	111	11.554	0.138675
141	0.05	8.819	0.1	9.49	0.125	9.749	0.2	10.399	0.25	10.784	0.5	12.648	0.75	15.209	0.8	16.061	0.875	17.886	0.9	18.786	0.95	21.572	111	11.484	0.136984
142	0.05	8.838	0.1	9.509	0.125	9.768	0.2	10.418	0.25	10.8	0.5	12.667	0.75	15.375	0.8	16.324	0.875	18.601	0.9	19.813	0.95	23.577	111	11.453	0.136938
143	0.05	8.87	0.1	9.535	0.125	9.791	0.2	10.442	0.25	10.823	0.5	12.669	0.75	15.45	0.8	16.496	0.875	19.295	0.9	20.922	0.95	25.69	111	11.466	0.138467
144	0.05	8.917	0.1	9.571	0.125	9.828	0.2	10.475	0.25	10.855	0.5	12.674	0.75	15.463	0.8	16.555	0.875	19.889	0.9	21.959	0.95	27.014	111	11.6	0.140646
145	0.05	8.974	0.1	9.617	0.125	9.873	0.2	10.516	0.25	10.895	0.5	12.684	0.75	15.448	0.8	16.547	0.875	20.282	0.9	22.734	0.95	26.573	111	11.696	0.143807
146	0.05	9.047	0.1	9.68	0.125	9.931	0.2	10.568	0.25	10.947	0.5	12.713	0.75	15.437	0.8	16.51	0.875	20.367	0.9	22.943	0.95	26.068	111	11.862	0.146581
147	0.05	9.132	0.1	9.757	0.125	10.003	0.2	10.633	0.25	11.011	0.5	12.767	0.75	15.442	0.8	16.491	0.875	20.153	0.9	22.49	0.95	25.517	111	11.924	0.147362
148	0.05	9.227	0.1	9.847	0.125	10.086	0.2	10.711	0.25	11.08	0.5	12.835	0.75	15.467	0.8	16.46	0.875	19.6	0.9	21.507	0.95	25.08	111	11.84	0.145801
149	0.05	9.335	0.1	9.94	0.125	10.182	0.2	10.802	0.25	11.164	0.5	12.92	0.75	15.489	0.8	16.398	0.875	18.877	0.9	20.336	0.95	24.509	111	11.893	0.144641
150	0.05	9.436	0.1	10.04	0.125	10.283	0.2	10.9	0.25	11.263	0.5	13.011	0.75	15.46	0.8	16.269	0.875	18.181	0.9	19.177	0.95	22.408	111	11.877	0.145199
151	0.05	9.533	0.1	10.146	0.125	10.385	0.2	11.007	0.25	11.36	0.5	13.085	0.75	15.389	0.8	16.095	0.875	17.555	0.9	18.269	0.95	20.603	111	11.896	0.147244
152	0.05	9.619	0.1	10.235	0.125	10.471	0.2	11.097	0.25	11.446	0.5	13.13	0.75	15.281	0.8	15.899	0.875	17.118	0.9	17.687	0.95	19.465	111	11.957	0.151834
153	0.05	9.667	0.1	10.279	0.125	10.522	0.2	11.148	0.25	11.501	0.5	13.143	0.75	15.186	0.8	15.766	0.875	16.887	0.9	17.393	0.95	18.895	111	11.956	0.155472
154	0.05	9.646	0.1	10.272	0.125	10.52	0.2	11.154	0.25	11.515	0.5	13.155	0.75	15.167	0.8	15.748	0.875	16.882	0.9	17.384	0.95	18.865	111	12.316	0.155441
155	0.05	9.553	0.1	10.219	0.125	10.479	0.2	11.134	0.25	11.51	0.5	13.195	0.75	15.274	0.8	15.882	0.875	17.08	0.9	17.621	0.95	19.155	111	12.441	0.151733
156	0.05	9.413	0.1	10.137	0.125	10.419	0.2	11.107	0.25	11.507	0.5	13.297	0.75	15.507	0.8	16.148	0.875	17.426	0.9	17.994	0.95	19.649	111	12.484	0.142202
157	0.05	9.251	0.1	10.049	0.125	10.356	0.2	11.096	0.25	11.521	0.5	13.459	0.75	15.825	0.8	16.502	0.875	17.871	0.9	18.472	0.95	20.291	111	12.489	0.131033
158	0.05	9.115	0.1	9.974	0.125	10.303	0.2	11.108	0.25	11.565	0.5	13.673	0.75	16.209	0.8	16.923	0.875	18.378	0.9	19.027	0.95	21.01	111	12.641	0.120954
