# Supplementary material for: Time-varying asymmetry and tail thickness in long series of daily financial returns
Source: publisher site journal article supplement (doi:10.1515/snde-2017-0071), 2018-10-02
Supplement: Supplementary file 321 [file thres_ucd.xlsx]

## Sheet: 1
	Var1	Var2	Var3	Var4	Var5	Var6	Var7	Var8	Var9	Var10	Var11	Var12	Var13	Var14	Var15	Var16	Var17	Var18	Var19	Var20	Var21	Var22	Var23	Var24	Var25
1	0	0	0	0	0	0	0	0	0	0	0	0	0	0	0	0	0	0	0	0	0	0	0	0	0
2	0.05	0.88445	0.1	0.9173	0.125	0.9304	0.2	0.96145	0.25	0.9797	0.5	1.0618	0.75	1.17265	0.8	1.2069	0.875	1.27345	0.9	1.3022	0.95	1.3849	111	1.01455	3.11994
3	0.05	0.86195	0.1	0.8932	0.125	0.90515	0.2	0.9337	0.25	0.95075	0.5	1.02715	0.75	1.131	0.8	1.1645	0.875	1.22995	0.9	1.25905	0.95	1.33955	111	0.98185	3.4121
4	0.05	0.8421	0.1	0.8714	0.125	0.88235	0.2	0.90925	0.25	0.92465	0.5	0.9964	0.75	1.09195	0.8	1.12245	0.875	1.1841	0.9	1.21055	0.95	1.2857	111	0.95265	3.60785
5	0.05	0.82465	0.1	0.85195	0.125	0.86245	0.2	0.88805	0.25	0.9025	0.5	0.9702	0.75	1.05755	0.8	1.0836	0.875	1.13755	0.9	1.1613	0.95	1.22805	111	0.9271	3.8335
6	0.05	0.80945	0.1	0.83575	0.125	0.8457	0.2	0.86995	0.25	0.88405	0.5	0.9474	0.75	1.0277	0.8	1.05015	0.875	1.0956	0.9	1.11665	0.95	1.1784	111	0.91195	4.12235
7	0.05	0.79685	0.1	0.8222	0.125	0.8318	0.2	0.85505	0.25	0.8688	0.5	0.92835	0.75	1.00215	0.8	1.0226	0.875	1.06425	0.9	1.08335	0.95	1.14205	111	0.90445	4.28074
8	0.05	0.78675	0.1	0.8114	0.125	0.8206	0.2	0.84345	0.25	0.85645	0.5	0.91355	0.75	0.98445	0.8	1.004	0.875	1.0433	0.9	1.0617	0.95	1.1178	111	0.88345	4.49711
9	0.05	0.77905	0.1	0.80365	0.125	0.8129	0.2	0.83515	0.25	0.84775	0.5	0.90385	0.75	0.9736	0.8	0.9932	0.875	1.032	0.9	1.0494	0.95	1.10465	111	0.88105	4.5831
10	0.05	0.77515	0.1	0.7997	0.125	0.809	0.2	0.83115	0.25	0.84365	0.5	0.89955	0.75	0.96975	0.8	0.989	0.875	1.0273	0.9	1.04505	0.95	1.1004	111	0.8804	4.60615
11	0.05	0.77505	0.1	0.7992	0.125	0.80875	0.2	0.8317	0.25	0.8444	0.5	0.90095	0.75	0.97165	0.8	0.99105	0.875	1.0302	0.9	1.0478	0.95	1.10475	111	0.87825	4.52216
12	0.05	0.7769	0.1	0.8016	0.125	0.81135	0.2	0.83515	0.25	0.8484	0.5	0.9074	0.75	0.97915	0.8	0.9995	0.875	1.03955	0.9	1.05715	0.95	1.11505	111	0.88735	4.3468
13	0.05	0.78065	0.1	0.8064	0.125	0.81625	0.2	0.8411	0.25	0.8552	0.5	0.9174	0.75	0.9919	0.8	1.01265	0.875	1.05405	0.9	1.0722	0.95	1.13075	111	0.8951	4.12535
14	0.05	0.7867	0.1	0.81355	0.125	0.8237	0.2	0.84965	0.25	0.86435	0.5	0.92945	0.75	1.008	0.8	1.0295	0.875	1.0718	0.9	1.09035	0.95	1.1507	111	0.90405	3.9521
15	0.05	0.7948	0.1	0.8231	0.125	0.83345	0.2	0.8604	0.25	0.87575	0.5	0.94275	0.75	1.02405	0.8	1.0464	0.875	1.08975	0.9	1.109	0.95	1.16985	111	0.9131	3.82906
16	0.05	0.80525	0.1	0.83465	0.125	0.84535	0.2	0.8727	0.25	0.88845	0.5	0.9563	0.75	1.03865	0.8	1.06065	0.875	1.10415	0.9	1.1232	0.95	1.18445	111	0.93025	3.80781
17	0.05	0.8172	0.1	0.84745	0.125	0.8585	0.2	0.88585	0.25	0.9014	0.5	0.9694	0.75	1.0497	0.8	1.07115	0.875	1.1128	0.9	1.1322	0.95	1.19055	111	0.9447	3.82185
18	0.05	0.8296	0.1	0.86025	0.125	0.87125	0.2	0.8984	0.25	0.9137	0.5	0.9799	0.75	1.05685	0.8	1.0776	0.875	1.1176	0.9	1.13585	0.95	1.191	111	0.95945	3.94383
19	0.05	0.8408	0.1	0.8706	0.125	0.8815	0.2	0.9075	0.25	0.92215	0.5	0.98615	0.75	1.06085	0.8	1.0807	0.875	1.1195	0.9	1.13815	0.95	1.19285	111	0.96495	4.06925
20	0.05	0.8441	0.1	0.8733	0.125	0.88425	0.2	0.91075	0.25	0.9255	0.5	0.9896	0.75	1.0637	0.8	1.08395	0.875	1.12275	0.9	1.141	0.95	1.1946	111	0.9715	4.03054
21	0.05	0.8343	0.1	0.86925	0.125	0.8814	0.2	0.91055	0.25	0.9264	0.5	0.992	0.75	1.0653	0.8	1.08525	0.875	1.1238	0.9	1.1414	0.95	1.1943	111	0.9745	3.94538
22	0.05	0.8123	0.1	0.86505	0.125	0.8789	0.2	0.9101	0.25	0.9261	0.5	0.99135	0.75	1.0632	0.8	1.08305	0.875	1.121	0.9	1.13855	0.95	1.191	111	0.98115	3.98938
23	0.05	0.7858	0.1	0.86075	0.125	0.87555	0.2	0.9062	0.25	0.922	0.5	0.98615	0.75	1.05675	0.8	1.0761	0.875	1.11365	0.9	1.13075	0.95	1.1819	111	0.9753	4.0783
24	0.05	0.7638	0.1	0.8528	0.125	0.86765	0.2	0.89785	0.25	0.9129	0.5	0.97555	0.75	1.04535	0.8	1.06435	0.875	1.1013	0.9	1.11795	0.95	1.1669	111	0.96195	4.18505
25	0.05	0.7555	0.1	0.83965	0.125	0.8542	0.2	0.8837	0.25	0.89895	0.5	0.96	0.75	1.02905	0.8	1.04785	0.875	1.08365	0.9	1.0998	0.95	1.14735	111	0.9449	4.29297
26	0.05	0.7592	0.1	0.8213	0.125	0.8361	0.2	0.86485	0.25	0.8796	0.5	0.93955	0.75	1.0079	0.8	1.02615	0.875	1.0607	0.9	1.07625	0.95	1.12235	111	0.9251	4.44863
27	0.05	0.7625	0.1	0.80255	0.125	0.81525	0.2	0.84215	0.25	0.8563	0.5	0.9148	0.75	0.9819	0.8	0.99955	0.875	1.0331	0.9	1.04835	0.95	1.09245	111	0.90835	4.68335
28	0.05	0.758	0.1	0.7857	0.125	0.7958	0.2	0.8187	0.25	0.83145	0.5	0.887	0.75	0.95185	0.8	0.96895	0.875	1.0014	0.9	1.01645	0.95	1.05875	111	0.87625	4.73517
29	0.05	0.7431	0.1	0.7664	0.125	0.7749	0.2	0.7953	0.25	0.80695	0.5	0.8583	0.75	0.91945	0.8	0.93565	0.875	0.96675	0.9	0.98115	0.95	1.0224	111	0.8417	5.04276
30	0.05	0.7173	0.1	0.7399	0.125	0.748	0.2	0.76815	0.25	0.7796	0.5	0.8295	0.75	0.88735	0.8	0.9025	0.875	0.93185	0.9	0.94545	0.95	0.98455	111	0.80915	5.16398
31	0.05	0.68825	0.1	0.70985	0.125	0.71785	0.2	0.7376	0.25	0.7487	0.5	0.79755	0.75	0.85505	0.8	0.8695	0.875	0.89845	0.9	0.9117	0.95	0.9483	111	0.77795	5.25842
32	0.05	0.65965	0.1	0.68005	0.125	0.6875	0.2	0.70645	0.25	0.71695	0.5	0.76405	0.75	0.82005	0.8	0.8345	0.875	0.8635	0.9	0.87615	0.95	0.91255	111	0.7446	5.46014
33	0.05	0.6328	0.1	0.65175	0.125	0.65875	0.2	0.6765	0.25	0.68635	0.5	0.7307	0.75	0.78375	0.8	0.7977	0.875	0.8257	0.9	0.8375	0.95	0.87285	111	0.71315	5.78841
34	0.05	0.60799	0.1	0.62553	0.125	0.6321	0.2	0.64847	0.25	0.65782	0.5	0.69898	0.75	0.74787	0.8	0.76082	0.875	0.78587	0.9	0.79713	0.95	0.82976	111	0.68336	6.2186
35	0.05	0.58557	0.1	0.60183	0.125	0.60795	0.2	0.62302	0.25	0.63173	0.5	0.66943	0.75	0.7136	0.8	0.72492	0.875	0.74724	0.9	0.75761	0.95	0.78721	111	0.6536	6.76609
36	0.05	0.56597	0.1	0.58088	0.125	0.58655	0.2	0.60022	0.25	0.60829	0.5	0.64245	0.75	0.68218	0.8	0.69254	0.875	0.71254	0.9	0.72189	0.95	0.7497	111	0.63101	7.50691
37	0.05	0.54869	0.1	0.56259	0.125	0.56783	0.2	0.58042	0.25	0.58773	0.5	0.61897	0.75	0.65523	0.8	0.66474	0.875	0.68351	0.9	0.692	0.95	0.71792	111	0.60877	8.30269
38	0.05	0.5339	0.1	0.54721	0.125	0.55206	0.2	0.56407	0.25	0.57081	0.5	0.59982	0.75	0.6333	0.8	0.64254	0.875	0.65995	0.9	0.66811	0.95	0.6923	111	0.59089	8.95098
39	0.05	0.52229	0.1	0.53531	0.125	0.54008	0.2	0.55158	0.25	0.55799	0.5	0.58546	0.75	0.61708	0.8	0.62569	0.875	0.64238	0.9	0.65008	0.95	0.67271	111	0.57868	9.40961
40	0.05	0.51431	0.1	0.5268	0.125	0.53152	0.2	0.54288	0.25	0.54924	0.5	0.57585	0.75	0.60615	0.8	0.61466	0.875	0.63092	0.9	0.63808	0.95	0.66013	111	0.57283	9.76676
41	0.05	0.50868	0.1	0.5212	0.125	0.52587	0.2	0.5373	0.25	0.54371	0.5	0.57065	0.75	0.60135	0.8	0.60988	0.875	0.62619	0.9	0.63345	0.95	0.65552	111	0.56522	9.59992
42	0.05	0.50529	0.1	0.51811	0.125	0.52269	0.2	0.53448	0.25	0.54112	0.5	0.56905	0.75	0.60204	0.8	0.61105	0.875	0.62925	0.9	0.63773	0.95	0.66231	111	0.55866	9.19984
43	0.05	0.50462	0.1	0.51793	0.125	0.52267	0.2	0.53465	0.25	0.54142	0.5	0.57049	0.75	0.60606	0.8	0.61638	0.875	0.63807	0.9	0.64853	0.95	0.6812	111	0.55943	8.80826
44	0.05	0.50739	0.1	0.52103	0.125	0.52596	0.2	0.53837	0.25	0.54527	0.5	0.57566	0.75	0.61323	0.8	0.62465	0.875	0.64968	0.9	0.66298	0.95	0.7084	111	0.56152	8.43967
45	0.05	0.51358	0.1	0.52755	0.125	0.53278	0.2	0.54569	0.25	0.55274	0.5	0.58438	0.75	0.62395	0.8	0.63592	0.875	0.6638	0.9	0.67951	0.95	0.73675	111	0.56877	8.08198
46	0.05	0.52306	0.1	0.53771	0.125	0.54314	0.2	0.55648	0.25	0.56379	0.5	0.59682	0.75	0.63823	0.8	0.65072	0.875	0.68076	0.9	0.69768	0.95	0.7592	111	0.58182	7.72833
47	0.05	0.53596	0.1	0.5513	0.125	0.55693	0.2	0.57081	0.25	0.57849	0.5	0.61291	0.75	0.65576	0.8	0.66878	0.875	0.69972	0.9	0.71627	0.95	0.77131	111	0.5973	7.41271
48	0.05	0.55231	0.1	0.56824	0.125	0.5741	0.2	0.58847	0.25	0.59649	0.5	0.63226	0.75	0.67603	0.8	0.68921	0.875	0.71811	0.9	0.73246	0.95	0.77432	111	0.61613	7.1452
49	0.05	0.57193	0.1	0.58824	0.125	0.5945	0.2	0.60924	0.25	0.61755	0.5	0.65414	0.75	0.69721	0.8	0.7094	0.875	0.73325	0.9	0.74392	0.95	0.77582	111	0.63837	6.98816
50	0.05	0.5939	0.1	0.61045	0.125	0.61668	0.2	0.63189	0.25	0.64028	0.5	0.67674	0.75	0.71741	0.8	0.72821	0.875	0.74892	0.9	0.75847	0.95	0.78642	111	0.66739	7.05515
51	0.05	0.6133	0.1	0.63142	0.125	0.63792	0.2	0.6537	0.25	0.6625	0.5	0.69945	0.75	0.74019	0.8	0.75112	0.875	0.77185	0.9	0.78122	0.95	0.80832	111	0.69095	6.97503
52	0.05	0.62481	0.1	0.64972	0.125	0.65764	0.2	0.67618	0.25	0.68615	0.5	0.72543	0.75	0.7671	0.8	0.77811	0.875	0.79855	0.9	0.80773	0.95	0.83429	111	0.72019	6.69385
53	0.05	0.63206	0.1	0.67055	0.125	0.6811	0.2	0.70232	0.25	0.71277	0.5	0.75297	0.75	0.79477	0.8	0.80573	0.875	0.82656	0.9	0.83587	0.95	0.86306	111	0.74923	6.65501
54	0.05	0.63925	0.1	0.69396	0.125	0.70546	0.2	0.72813	0.25	0.73897	0.5	0.77998	0.75	0.82305	0.8	0.83429	0.875	0.85588	0.9	0.86553	0.95	0.89438	111	0.77537	6.52229
55	0.05	0.65402	0.1	0.71429	0.125	0.72704	0.2	0.7516	0.25	0.76327	0.5	0.80672	0.75	0.85129	0.8	0.86286	0.875	0.88561	0.9	0.89582	0.95	0.92551	111	0.80271	6.23085
56	0.05	0.67344	0.1	0.72992	0.125	0.745	0.2	0.77327	0.25	0.78631	0.5	0.83253	0.75	0.87841	0.8	0.89053	0.875	0.91416	0.9	0.9248	0.95	0.95589	111	0.83041	5.97112
57	0.05	0.69647	0.1	0.74621	0.125	0.76325	0.2	0.79407	0.25	0.80775	0.5	0.85608	0.75	0.90346	0.8	0.91572	0.875	0.94082	0.9	0.95173	0.95	0.98423	111	0.8542	5.80693
58	0.05	0.72079	0.1	0.76998	0.125	0.78454	0.2	0.81349	0.25	0.82732	0.5	0.87638	0.75	0.92529	0.8	0.93838	0.875	0.96424	0.9	0.97562	0.95	1.00914	111	0.8742	5.65221
59	0.05	0.74732	0.1	0.79403	0.125	0.80609	0.2	0.83145	0.25	0.84425	0.5	0.89344	0.75	0.94363	0.8	0.95728	0.875	0.98412	0.9	0.9959	0.95	1.02977	111	0.89201	5.53464
60	0.05	0.76299	0.1	0.80965	0.125	0.82122	0.2	0.8457	0.25	0.85798	0.5	0.90701	0.75	0.95841	0.8	0.97246	0.875	0.99977	0.9	1.01197	0.95	1.04642	111	0.90406	5.46762
61	0.05	0.76806	0.1	0.8167	0.125	0.82853	0.2	0.85363	0.25	0.86602	0.5	0.91607	0.75	0.96868	0.8	0.98286	0.875	1.01093	0.9	1.02336	0.95	1.05822	111	0.91388	5.35952
62	0.05	0.76787	0.1	0.81732	0.125	0.82954	0.2	0.85519	0.25	0.86813	0.5	0.91924	0.75	0.9732	0.8	0.98763	0.875	1.01643	0.9	1.02891	0.95	1.06488	111	0.91413	5.18939
63	0.05	0.76399	0.1	0.81366	0.125	0.82584	0.2	0.85186	0.25	0.86489	0.5	0.91695	0.75	0.97198	0.8	0.98636	0.875	1.01547	0.9	1.02815	0.95	1.0653	111	0.90894	5.08209
64	0.05	0.75775	0.1	0.8053	0.125	0.81763	0.2	0.84393	0.25	0.85707	0.5	0.90983	0.75	0.9656	0.8	0.98015	0.875	1.0093	0.9	1.02233	0.95	1.06069	111	0.90374	5.04941
65	0.05	0.74875	0.1	0.79275	0.125	0.80533	0.2	0.83217	0.25	0.84582	0.5	0.89967	0.75	0.9559	0.8	0.97058	0.875	0.99981	0.9	1.01321	0.95	1.05228	111	0.89453	4.92874
66	0.05	0.74008	0.1	0.77914	0.125	0.7916	0.2	0.81865	0.25	0.83267	0.5	0.88766	0.75	0.94403	0.8	0.95881	0.875	0.98814	0.9	1.00142	0.95	1.04092	111	0.88539	4.87674
67	0.05	0.73516	0.1	0.76802	0.125	0.77978	0.2	0.80637	0.25	0.82043	0.5	0.875	0.75	0.93085	0.8	0.94566	0.875	0.97506	0.9	0.98825	0.95	1.0276	111	0.87332	4.93166
68	0.05	0.73341	0.1	0.76241	0.125	0.7728	0.2	0.79714	0.25	0.81011	0.5	0.86281	0.75	0.91745	0.8	0.93217	0.875	0.96122	0.9	0.97428	0.95	1.01274	111	0.85937	5.07343
69	0.05	0.73305	0.1	0.7593	0.125	0.76864	0.2	0.79079	0.25	0.8028	0.5	0.8522	0.75	0.90525	0.8	0.9199	0.875	0.9484	0.9	0.96119	0.95	0.9988	111	0.84508	5.30706
70	0.05	0.73392	0.1	0.75731	0.125	0.76561	0.2	0.78624	0.25	0.79744	0.5	0.84433	0.75	0.8961	0.8	0.91072	0.875	0.93882	0.9	0.95131	0.95	0.98826	111	0.83637	5.54789
71	0.05	0.73387	0.1	0.75577	0.125	0.76379	0.2	0.78335	0.25	0.794	0.5	0.83976	0.75	0.89182	0.8	0.90635	0.875	0.93463	0.9	0.9473	0.95	0.9854	111	0.82732	5.63042
72	0.05	0.7304	0.1	0.75247	0.125	0.76067	0.2	0.78053	0.25	0.79135	0.5	0.83815	0.75	0.89327	0.8	0.90875	0.875	0.93971	0.9	0.95354	0.95	0.9932	111	0.82526	5.49323
73	0.05	0.72754	0.1	0.74944	0.125	0.75777	0.2	0.77782	0.25	0.78893	0.5	0.83727	0.75	0.899	0.8	0.91722	0.875	0.95495	0.9	0.9718	0.95	1.01996	111	0.81543	5.28215
74	0.05	0.72764	0.1	0.74918	0.125	0.7574	0.2	0.77776	0.25	0.78902	0.5	0.83805	0.75	0.90381	0.8	0.92484	0.875	0.97649	0.9	1.00155	0.95	1.06388	111	0.81321	5.22308
75	0.05	0.73105	0.1	0.7525	0.125	0.76085	0.2	0.7812	0.25	0.7927	0.5	0.8427	0.75	0.9106	0.8	0.9329	0.875	0.9945	0.9	1.03095	0.95	1.1129	111	0.8182	5.14152
76	0.05	0.7382	0.1	0.75985	0.125	0.7683	0.2	0.7888	0.25	0.80045	0.5	0.852	0.75	0.92145	0.8	0.9449	0.875	1.01195	0.9	1.05495	0.95	1.15035	111	0.83055	5.03075
77	0.05	0.7492	0.1	0.7713	0.125	0.78	0.2	0.80085	0.25	0.81275	0.5	0.8659	0.75	0.93735	0.8	0.9616	0.875	1.0302	0.9	1.0731	0.95	1.16705	111	0.84575	4.89944
78	0.05	0.76455	0.1	0.78745	0.125	0.7961	0.2	0.8175	0.25	0.82975	0.5	0.8848	0.75	0.9584	0.8	0.98325	0.875	1.04815	0.9	1.0835	0.95	1.16505	111	0.86655	4.70438
79	0.05	0.7844	0.1	0.80785	0.125	0.8168	0.2	0.8389	0.25	0.85165	0.5	0.9086	0.75	0.9835	0.8	1.0078	0.875	1.06125	0.9	1.0869	0.95	1.1545	111	0.88915	4.5096
80	0.05	0.80835	0.1	0.83275	0.125	0.84215	0.2	0.865	0.25	0.8782	0.5	0.9368	0.75	1.00905	0.8	1.0299	0.875	1.0731	0.9	1.0927	0.95	1.1492	111	0.91525	4.36412
81	0.05	0.83645	0.1	0.8615	0.125	0.87125	0.2	0.89465	0.25	0.908	0.5	0.96635	0.75	1.0346	0.8	1.0539	0.875	1.0922	0.9	1.1096	0.95	1.1621	111	0.9483	4.39152
82	0.05	0.8653	0.1	0.89095	0.125	0.90075	0.2	0.92495	0.25	0.9386	0.5	0.99795	0.75	1.06625	0.8	1.08515	0.875	1.12305	0.9	1.13955	0.95	1.1918	111	0.9795	4.32066
83	0.05	0.89155	0.1	0.92045	0.125	0.93105	0.2	0.9572	0.25	0.9716	0.5	1.0339	0.75	1.1048	0.8	1.12385	0.875	1.16265	0.9	1.1802	0.95	1.2353	111	1.01575	4.12574
84	0.05	0.9183	0.1	0.95165	0.125	0.9637	0.2	0.99235	0.25	1.00815	0.5	1.07425	0.75	1.14885	0.8	1.1689	0.875	1.21	0.9	1.22895	0.95	1.28625	111	1.05545	3.91826
85	0.05	0.94665	0.1	0.9856	0.125	0.9991	0.2	1.0306	0.25	1.0478	0.5	1.1182	0.75	1.1975	0.8	1.21885	0.875	1.26205	0.9	1.28165	0.95	1.3414	111	1.0959	3.69336
86	0.05	0.9797	0.1	1.02295	0.125	1.03755	0.2	1.07155	0.25	1.0902	0.5	1.165	0.75	1.2485	0.8	1.2708	0.875	1.31595	0.9	1.33625	0.95	1.39845	111	1.1442	3.48363
87	0.05	1.0169	0.1	1.06415	0.125	1.0799	0.2	1.11575	0.25	1.13485	0.5	1.21255	0.75	1.29945	0.8	1.32315	0.875	1.36985	0.9	1.3913	0.95	1.45565	111	1.1916	3.34795
88	0.05	1.0565	0.1	1.1076	0.125	1.1241	0.2	1.1604	0.25	1.17965	0.5	1.25905	0.75	1.3496	0.8	1.37405	0.875	1.423	0.9	1.4451	0.95	1.51195	111	1.2349	3.25437
89	0.05	1.0905	0.1	1.1485	0.125	1.165	0.2	1.20205	0.25	1.22125	0.5	1.30265	0.75	1.39675	0.8	1.42225	0.875	1.473	0.9	1.49615	0.95	1.56525	111	1.27225	3.16986
90	0.05	1.1193	0.1	1.18165	0.125	1.1985	0.2	1.23665	0.25	1.25625	0.5	1.34045	0.75	1.43875	0.8	1.46535	0.875	1.51765	0.9	1.5417	0.95	1.61365	111	1.30745	3.06794
91	0.05	1.14225	0.1	1.2059	0.125	1.2235	0.2	1.26235	0.25	1.2829	0.5	1.37045	0.75	1.47255	0.8	1.50065	0.875	1.5548	0.9	1.5796	0.95	1.6545	111	1.3374	2.96579
92	0.05	1.15935	0.1	1.21975	0.125	1.2383	0.2	1.27795	0.25	1.2991	0.5	1.3898	0.75	1.49625	0.8	1.52535	0.875	1.5822	0.9	1.60815	0.95	1.68565	111	1.35935	2.83896
93	0.05	1.1651	0.1	1.2226	0.125	1.2415	0.2	1.2823	0.25	1.3041	0.5	1.3985	0.75	1.5095	0.8	1.5397	0.875	1.5997	0.9	1.6266	0.95	1.7062	111	1.3706	2.7487
94	0.05	1.1568	0.1	1.2137	0.125	1.2335	0.2	1.276	0.25	1.2992	0.5	1.3974	0.75	1.5131	0.8	1.5442	0.875	1.6062	0.9	1.6346	0.95	1.7155	111	1.3711	2.65616
95	0.05	1.1381	0.1	1.1956	0.125	1.2164	0.2	1.2624	0.25	1.2867	0.5	1.3886	0.75	1.5067	0.8	1.5387	0.875	1.6025	0.9	1.6313	0.95	1.7137	111	1.3605	2.5652
96	0.05	1.1107	0.1	1.1754	0.125	1.1969	0.2	1.2444	0.25	1.269	0.5	1.3721	0.75	1.491	0.8	1.5233	0.875	1.5879	0.9	1.6166	0.95	1.7001	111	1.3448	2.53696
97	0.05	1.0776	0.1	1.1524	0.125	1.1743	0.2	1.2217	0.25	1.2463	0.5	1.3486	0.75	1.4669	0.8	1.4989	0.875	1.5632	0.9	1.5919	0.95	1.6758	111	1.32	2.55829
98	0.05	1.0431	0.1	1.1237	0.125	1.1457	0.2	1.1933	0.25	1.2176	0.5	1.3185	0.75	1.435	0.8	1.467	0.875	1.5303	0.9	1.5588	0.95	1.6425	111	1.2901	2.59396
99	0.05	1.0181	0.1	1.0902	0.125	1.1119	0.2	1.1586	0.25	1.1827	0.5	1.2825	0.75	1.3976	0.8	1.4291	0.875	1.4907	0.9	1.5189	0.95	1.6019	111	1.2567	2.62891
100	0.05	1.0012	0.1	1.0577	0.125	1.0767	0.2	1.1202	0.25	1.1436	0.5	1.2416	0.75	1.3552	0.8	1.3863	0.875	1.4462	0.9	1.4741	0.95	1.5566	111	1.2138	2.65425
101	0.05	0.9862	0.1	1.0283	0.125	1.0442	0.2	1.0827	0.25	1.1042	0.5	1.1973	0.75	1.309	0.8	1.3392	0.875	1.3987	0.9	1.4261	0.95	1.5085	111	1.1635	2.77203
102	0.05	0.96535	0.1	1.00085	0.125	1.01415	0.2	1.0481	0.25	1.0673	0.5	1.15355	0.75	1.26085	0.8	1.2903	0.875	1.3488	0.9	1.3764	0.95	1.45915	111	1.11505	2.9745
103	0.05	0.9336	0.1	0.9678	0.125	0.98085	0.2	1.01315	0.25	1.0314	0.5	1.1131	0.75	1.21535	0.8	1.2435	0.875	1.3009	0.9	1.328	0.95	1.41015	111	1.0737	3.12357
104	0.05	0.89795	0.1	0.9306	0.125	0.94315	0.2	0.97445	0.25	0.99235	0.5	1.0731	0.75	1.17415	0.8	1.20185	0.875	1.2596	0.9	1.28615	0.95	1.3679	111	1.0327	3.15057
105	0.05	0.8638	0.1	0.89495	0.125	0.90685	0.2	0.9363	0.25	0.9533	0.5	1.0314	0.75	1.13345	0.8	1.1623	0.875	1.22245	0.9	1.25015	0.95	1.3319	111	0.98565	3.27597
106	0.05	0.8327	0.1	0.8623	0.125	0.87345	0.2	0.90135	0.25	0.9174	0.5	0.9916	0.75	1.09085	0.8	1.12065	0.875	1.18415	0.9	1.2122	0.95	1.2944	111	0.9467	3.4504
107	0.05	0.80565	0.1	0.83315	0.125	0.8439	0.2	0.87035	0.25	0.8853	0.5	0.95575	0.75	1.04995	0.8	1.07865	0.875	1.14145	0.9	1.16995	0.95	1.2493	111	0.91045	3.65467
108	0.05	0.78205	0.1	0.808	0.125	0.8182	0.2	0.8433	0.25	0.8577	0.5	0.9243	0.75	1.01265	0.8	1.03895	0.875	1.09595	0.9	1.12235	0.95	1.1958	111	0.8837	3.84242
109	0.05	0.7623	0.1	0.7867	0.125	0.7965	0.2	0.82045	0.25	0.83435	0.5	0.8974	0.75	0.9793	0.8	1.0032	0.875	1.0519	0.9	1.07395	0.95	1.14015	111	0.8625	4.05182
110	0.05	0.746	0.1	0.76965	0.125	0.7788	0.2	0.80195	0.25	0.81515	0.5	0.87525	0.75	0.9494	0.8	0.9706	0.875	1.01235	0.9	1.0309	0.95	1.08825	111	0.8459	4.26616
111	0.05	0.73335	0.1	0.7561	0.125	0.76485	0.2	0.78735	0.25	0.8001	0.5	0.8569	0.75	0.92495	0.8	0.9435	0.875	0.981	0.9	0.998	0.95	1.0488	111	0.835	4.4978
112	0.05	0.72355	0.1	0.74565	0.125	0.7543	0.2	0.77595	0.25	0.78845	0.5	0.84265	0.75	0.90675	0.8	0.9242	0.875	0.9588	0.9	0.97545	0.95	1.02305	111	0.8249	4.72113
113	0.05	0.71615	0.1	0.7384	0.125	0.747	0.2	0.76835	0.25	0.78055	0.5	0.8334	0.75	0.89545	0.8	0.91245	0.875	0.94585	0.9	0.9621	0.95	1.00935	111	0.8072	4.86454
114	0.05	0.7122	0.1	0.73505	0.125	0.74375	0.2	0.76505	0.25	0.77715	0.5	0.8296	0.75	0.8907	0.8	0.90765	0.875	0.9407	0.9	0.95645	0.95	1.00335	111	0.81075	4.86935
115	0.05	0.71275	0.1	0.73595	0.125	0.74475	0.2	0.7663	0.25	0.7783	0.5	0.83095	0.75	0.8919	0.8	0.9084	0.875	0.9419	0.9	0.95725	0.95	1.0037	111	0.81425	4.86134
116	0.05	0.71705	0.1	0.7406	0.125	0.74965	0.2	0.7716	0.25	0.78365	0.5	0.83685	0.75	0.898	0.8	0.91475	0.875	0.94835	0.9	0.96385	0.95	1.0101	111	0.82005	4.81834
117	0.05	0.7235	0.1	0.74805	0.125	0.75735	0.2	0.7798	0.25	0.79215	0.5	0.8466	0.75	0.9085	0.8	0.9258	0.875	0.9598	0.9	0.9753	0.95	1.0221	111	0.83155	4.70997
118	0.05	0.73165	0.1	0.75705	0.125	0.76665	0.2	0.7898	0.25	0.80265	0.5	0.859	0.75	0.92235	0.8	0.94005	0.875	0.97485	0.9	0.99095	0.95	1.039	111	0.84445	4.55294
119	0.05	0.7409	0.1	0.76745	0.125	0.77715	0.2	0.8009	0.25	0.81425	0.5	0.87245	0.75	0.9378	0.8	0.9558	0.875	0.9918	0.9	1.00855	0.95	1.0586	111	0.8571	4.4123
120	0.05	0.75105	0.1	0.7783	0.125	0.78835	0.2	0.8126	0.25	0.8263	0.5	0.8861	0.75	0.9529	0.8	0.9713	0.875	1.00835	0.9	1.0254	0.95	1.07635	111	0.8712	4.31264
121	0.05	0.7611	0.1	0.78925	0.125	0.79945	0.2	0.8242	0.25	0.8383	0.5	0.89875	0.75	0.96585	0.8	0.9846	0.875	1.02205	0.9	1.03885	0.95	1.0894	111	0.8856	4.28827
122	0.05	0.77045	0.1	0.79885	0.125	0.8092	0.2	0.83455	0.25	0.84885	0.5	0.90865	0.75	0.97575	0.8	0.99425	0.875	1.03165	0.9	1.0486	0.95	1.0973	111	0.895	4.32728
123	0.05	0.77725	0.1	0.8057	0.125	0.8161	0.2	0.84145	0.25	0.85555	0.5	0.91495	0.75	0.9824	0.8	1.00095	0.875	1.0383	0.9	1.05525	0.95	1.1046	111	0.89975	4.34004
124	0.05	0.77715	0.1	0.80615	0.125	0.81665	0.2	0.84245	0.25	0.8569	0.5	0.9181	0.75	0.987	0.8	1.0059	0.875	1.0441	0.9	1.0616	0.95	1.11215	111	0.9021	4.21109
125	0.05	0.76605	0.1	0.79875	0.125	0.8108	0.2	0.8393	0.25	0.855	0.5	0.9195	0.75	0.99015	0.8	1.0092	0.875	1.0477	0.9	1.0656	0.95	1.11665	111	0.90825	4.04888
126	0.05	0.74455	0.1	0.78925	0.125	0.8037	0.2	0.83545	0.25	0.8519	0.5	0.91825	0.75	0.9893	0.8	1.00845	0.875	1.0469	0.9	1.06435	0.95	1.1156	111	0.91025	3.97949
127	0.05	0.71845	0.1	0.78045	0.125	0.7965	0.2	0.8298	0.25	0.8467	0.5	0.91315	0.75	0.9835	0.8	1.0028	0.875	1.0408	0.9	1.0579	0.95	1.10905	111	0.9069	3.98139
128	0.05	0.6946	0.1	0.77065	0.125	0.7872	0.2	0.82055	0.25	0.8374	0.5	0.90335	0.75	0.9727	0.8	0.992	0.875	1.02955	0.9	1.04615	0.95	1.0967	111	0.89805	4.00028
129	0.05	0.68115	0.1	0.7579	0.125	0.7745	0.2	0.80745	0.25	0.824	0.5	0.8888	0.75	0.9575	0.8	0.976	0.875	1.0127	0.9	1.0293	0.95	1.07845	111	0.87355	4.06309
130	0.05	0.67985	0.1	0.7418	0.125	0.75825	0.2	0.79055	0.25	0.8066	0.5	0.87005	0.75	0.9373	0.8	0.9555	0.875	0.99155	0.9	1.0073	0.95	1.05485	111	0.85935	4.18179
131	0.05	0.68355	0.1	0.72605	0.125	0.74015	0.2	0.77065	0.25	0.78635	0.5	0.8476	0.75	0.9134	0.8	0.93095	0.875	0.96575	0.9	0.98135	0.95	1.0274	111	0.8384	4.31985
132	0.05	0.6827	0.1	0.71305	0.125	0.72415	0.2	0.75035	0.25	0.76455	0.5	0.8225	0.75	0.88645	0.8	0.9036	0.875	0.93655	0.9	0.9517	0.95	0.99595	111	0.81105	4.53108
133	0.05	0.6734	0.1	0.69885	0.125	0.7083	0.2	0.7312	0.25	0.7439	0.5	0.7969	0.75	0.85755	0.8	0.87395	0.875	0.90545	0.9	0.9197	0.95	0.96205	111	0.78325	4.89941
134	0.05	0.65425	0.1	0.6788	0.125	0.68765	0.2	0.70965	0.25	0.72175	0.5	0.7723	0.75	0.82925	0.8	0.84455	0.875	0.87385	0.9	0.8874	0.95	0.92735	111	0.7605	5.16246
135	0.05	0.63169	0.1	0.65531	0.125	0.66391	0.2	0.68494	0.25	0.69676	0.5	0.74661	0.75	0.80217	0.8	0.81686	0.875	0.84472	0.9	0.85713	0.95	0.89466	111	0.7353	5.20424
136	0.05	0.60962	0.1	0.63159	0.125	0.63978	0.2	0.65983	0.25	0.67097	0.5	0.71912	0.75	0.77368	0.8	0.78858	0.875	0.81663	0.9	0.82858	0.95	0.8639	111	0.70742	5.34654
137	0.05	0.58929	0.1	0.60957	0.125	0.61718	0.2	0.63588	0.25	0.64638	0.5	0.69172	0.75	0.74392	0.8	0.75845	0.875	0.7861	0.9	0.79833	0.95	0.83271	111	0.67789	5.64131
138	0.05	0.57133	0.1	0.58986	0.125	0.59691	0.2	0.61402	0.25	0.62372	0.5	0.66567	0.75	0.71438	0.8	0.72771	0.875	0.7539	0.9	0.76539	0.95	0.79833	111	0.6514	6.09927
139	0.05	0.55605	0.1	0.5728	0.125	0.57904	0.2	0.59478	0.25	0.60355	0.5	0.64185	0.75	0.68639	0.8	0.69835	0.875	0.72169	0.9	0.73197	0.95	0.76235	111	0.62896	6.70165
140	0.05	0.54318	0.1	0.55837	0.125	0.56413	0.2	0.57821	0.25	0.58622	0.5	0.621	0.75	0.66072	0.8	0.67146	0.875	0.69236	0.9	0.70165	0.95	0.72911	111	0.61069	7.38677
141	0.05	0.53209	0.1	0.54637	0.125	0.55161	0.2	0.5644	0.25	0.57167	0.5	0.60331	0.75	0.63925	0.8	0.649	0.875	0.66789	0.9	0.67642	0.95	0.70135	111	0.59467	8.13516
142	0.05	0.52287	0.1	0.53627	0.125	0.54132	0.2	0.55341	0.25	0.56017	0.5	0.58938	0.75	0.6228	0.8	0.63173	0.875	0.64939	0.9	0.65724	0.95	0.68052	111	0.58131	8.80595
143	0.05	0.5156	0.1	0.52857	0.125	0.53352	0.2	0.54552	0.25	0.55199	0.5	0.57996	0.75	0.61206	0.8	0.62061	0.875	0.63725	0.9	0.64476	0.95	0.66678	111	0.5735	9.16638
144	0.05	0.51076	0.1	0.52375	0.125	0.52871	0.2	0.54061	0.25	0.54708	0.5	0.5749	0.75	0.60676	0.8	0.61531	0.875	0.63194	0.9	0.63922	0.95	0.66099	111	0.56818	9.18543
145	0.05	0.50847	0.1	0.52167	0.125	0.52668	0.2	0.53877	0.25	0.54533	0.5	0.57396	0.75	0.60699	0.8	0.61593	0.875	0.63351	0.9	0.6415	0.95	0.66451	111	0.56172	8.89261
146	0.05	0.50853	0.1	0.52213	0.125	0.52725	0.2	0.53964	0.25	0.54657	0.5	0.57688	0.75	0.6125	0.8	0.62251	0.875	0.64268	0.9	0.65163	0.95	0.67819	111	0.56296	8.43828
147	0.05	0.51091	0.1	0.52513	0.125	0.53043	0.2	0.54345	0.25	0.5508	0.5	0.58311	0.75	0.62276	0.8	0.63461	0.875	0.65879	0.9	0.66941	0.95	0.70137	111	0.56579	7.91543
148	0.05	0.51588	0.1	0.53095	0.125	0.53652	0.2	0.55026	0.25	0.55806	0.5	0.5928	0.75	0.6372	0.8	0.6512	0.875	0.68017	0.9	0.69352	0.95	0.73201	111	0.5747	7.34023
149	0.05	0.52373	0.1	0.53965	0.125	0.54575	0.2	0.56041	0.25	0.56868	0.5	0.60626	0.75	0.65552	0.8	0.67142	0.875	0.70506	0.9	0.72055	0.95	0.76526	111	0.58611	6.81461
150	0.05	0.53444	0.1	0.55165	0.125	0.55812	0.2	0.57401	0.25	0.58273	0.5	0.62347	0.75	0.67759	0.8	0.69507	0.875	0.7314	0.9	0.74816	0.95	0.79512	111	0.60133	6.2791
151	0.05	0.54833	0.1	0.56676	0.125	0.57386	0.2	0.59085	0.25	0.60034	0.5	0.64453	0.75	0.70261	0.8	0.72087	0.875	0.7573	0.9	0.77388	0.95	0.81849	111	0.62116	5.77705
152	0.05	0.56526	0.1	0.58515	0.125	0.59265	0.2	0.6109	0.25	0.62124	0.5	0.66893	0.75	0.72902	0.8	0.74707	0.875	0.78046	0.9	0.79543	0.95	0.83614	111	0.64574	5.35195
153	0.05	0.58518	0.1	0.6064	0.125	0.6145	0.2	0.63412	0.25	0.64525	0.5	0.69559	0.75	0.75462	0.8	0.77085	0.875	0.80174	0.9	0.81514	0.95	0.85292	111	0.6758	5.07709
154	0.05	0.60767	0.1	0.63022	0.125	0.63853	0.2	0.65936	0.25	0.67104	0.5	0.72194	0.75	0.77863	0.8	0.79434	0.875	0.82415	0.9	0.8376	0.95	0.87665	111	0.70967	5.06084
155	0.05	0.63015	0.1	0.6537	0.125	0.66235	0.2	0.684	0.25	0.69595	0.5	0.7475	0.75	0.805	0.8	0.82075	0.875	0.85235	0.9	0.8664	0.95	0.90865	111	0.7334	4.99696
156	0.05	0.6476	0.1	0.674	0.125	0.68365	0.2	0.7069	0.25	0.71985	0.5	0.7743	0.75	0.8353	0.8	0.85235	0.875	0.88615	0.9	0.90115	0.95	0.94585	111	0.7588	4.74103
157	0.05	0.65985	0.1	0.6924	0.125	0.7037	0.2	0.7302	0.25	0.74465	0.5	0.8037	0.75	0.86855	0.8	0.88635	0.875	0.9212	0.9	0.93705	0.95	0.9841	111	0.7912	4.42135
158	0.05	0.66855	0.1	0.7104	0.125	0.72435	0.2	0.755	0.25	0.77105	0.5	0.8346	0.75	0.90185	0.8	0.9201	0.875	0.95585	0.9	0.97265	0.95	1.02115	111	0.8291	4.20932
