# Supplementary material for: Time-varying asymmetry and tail thickness in long series of daily financial returns
Source: publisher site journal article supplement (doi:10.1515/snde-2017-0071), 2018-10-02
Supplement: Supplementary file 323 [file thres_ucv.xlsx]

## Sheet: 1
	Var1	Var2	Var3	Var4	Var5	Var6	Var7	Var8	Var9	Var10	Var11	Var12	Var13	Var14	Var15	Var16	Var17	Var18	Var19	Var20	Var21	Var22	Var23	Var24	Var25
1	0	0	0	0	0	0	0	0	0	0	0	0	0	0	0	0	0	0	0	0	0	0	0	0	0
2	0.05	0.7823	0.1	0.8414	0.125	0.8657	0.2	0.9244	0.25	0.9599	0.5	1.1274	0.75	1.3751	0.8	1.4566	0.875	1.6217	0.9	1.6958	0.95	1.918	111	1.0126	1.54641
3	0.05	0.7429	0.1	0.7978	0.125	0.8192	0.2	0.8718	0.25	0.9039	0.5	1.0551	0.75	1.2792	0.8	1.356	0.875	1.5128	0.9	1.5852	0.95	1.7944	111	0.9472	1.74574
4	0.05	0.7091	0.1	0.7593	0.125	0.7785	0.2	0.8267	0.25	0.855	0.5	0.9928	0.75	1.1924	0.8	1.2599	0.875	1.4021	0.9	1.4654	0.95	1.653	111	0.8982	1.89935
5	0.05	0.68	0.1	0.7258	0.125	0.7438	0.2	0.7887	0.25	0.8145	0.5	0.9413	0.75	1.1184	0.8	1.1742	0.875	1.2941	0.9	1.3486	0.95	1.5081	111	0.853	2.07219
6	0.05	0.6552	0.1	0.6985	0.125	0.7152	0.2	0.7568	0.25	0.7815	0.5	0.8976	0.75	1.0562	0.8	1.1028	0.875	1.2004	0.9	1.2469	0.95	1.3886	111	0.8274	2.26513
7	0.05	0.635	0.1	0.676	0.125	0.6919	0.2	0.7311	0.25	0.7548	0.5	0.8618	0.75	1.0043	0.8	1.0457	0.875	1.1327	0.9	1.1736	0.95	1.3043	111	0.7918	2.37876
8	0.05	0.619	0.1	0.6584	0.125	0.6734	0.2	0.7114	0.25	0.7335	0.5	0.8346	0.75	0.9692	0.8	1.008	0.875	1.0885	0.9	1.1273	0.95	1.2495	111	0.7705	2.55438
9	0.05	0.6069	0.1	0.6458	0.125	0.6608	0.2	0.6975	0.25	0.7186	0.5	0.8169	0.75	0.9479	0.8	0.9864	0.875	1.0651	0.9	1.1012	0.95	1.2202	111	0.7647	2.61215
10	0.05	0.6008	0.1	0.6395	0.125	0.6544	0.2	0.6908	0.25	0.7117	0.5	0.8092	0.75	0.9404	0.8	0.9781	0.875	1.0553	0.9	1.0921	0.95	1.2108	111	0.7669	2.6239
11	0.05	0.6007	0.1	0.6387	0.125	0.654	0.2	0.6917	0.25	0.713	0.5	0.8117	0.75	0.9441	0.8	0.9822	0.875	1.0614	0.9	1.0979	0.95	1.2205	111	0.759	2.58531
12	0.05	0.6036	0.1	0.6426	0.125	0.6583	0.2	0.6975	0.25	0.7198	0.5	0.8234	0.75	0.9588	0.8	0.999	0.875	1.0807	0.9	1.1176	0.95	1.2433	111	0.7751	2.45936
13	0.05	0.6094	0.1	0.6503	0.125	0.6663	0.2	0.7075	0.25	0.7314	0.5	0.8416	0.75	0.9839	0.8	1.0255	0.875	1.1111	0.9	1.1497	0.95	1.2785	111	0.7882	2.31736
14	0.05	0.6189	0.1	0.6619	0.125	0.6785	0.2	0.7219	0.25	0.7471	0.5	0.8639	0.75	1.0161	0.8	1.0598	0.875	1.1488	0.9	1.1888	0.95	1.3241	111	0.802	2.1985
15	0.05	0.6317	0.1	0.6775	0.125	0.6946	0.2	0.7403	0.25	0.7669	0.5	0.8888	0.75	1.0486	0.8	1.0949	0.875	1.1876	0.9	1.2298	0.95	1.3685	111	0.8201	2.10715
16	0.05	0.6484	0.1	0.6966	0.125	0.7147	0.2	0.7616	0.25	0.7893	0.5	0.9145	0.75	1.0788	0.8	1.1249	0.875	1.2192	0.9	1.2616	0.95	1.403	111	0.8557	2.05134
17	0.05	0.6678	0.1	0.7182	0.125	0.737	0.2	0.7847	0.25	0.8125	0.5	0.9398	0.75	1.1019	0.8	1.1474	0.875	1.2384	0.9	1.2819	0.95	1.4174	111	0.883	2.02804
18	0.05	0.6882	0.1	0.7401	0.125	0.7591	0.2	0.8071	0.25	0.8349	0.5	0.9602	0.75	1.1169	0.8	1.1612	0.875	1.249	0.9	1.2901	0.95	1.4185	111	0.9099	2.06231
19	0.05	0.707	0.1	0.758	0.125	0.777	0.2	0.8236	0.25	0.8504	0.5	0.9725	0.75	1.1254	0.8	1.1679	0.875	1.2533	0.9	1.2954	0.95	1.4229	111	0.9206	2.11564
20	0.05	0.7125	0.1	0.7626	0.125	0.7819	0.2	0.8295	0.25	0.8566	0.5	0.9793	0.75	1.1315	0.8	1.175	0.875	1.2606	0.9	1.3018	0.95	1.4271	111	0.9287	2.08416
21	0.05	0.696	0.1	0.7556	0.125	0.7769	0.2	0.8291	0.25	0.8582	0.5	0.9841	0.75	1.1349	0.8	1.1778	0.875	1.2629	0.9	1.3028	0.95	1.4264	111	0.932	2.03471
22	0.05	0.6599	0.1	0.7483	0.125	0.7725	0.2	0.8282	0.25	0.8577	0.5	0.9828	0.75	1.1304	0.8	1.1729	0.875	1.2567	0.9	1.2963	0.95	1.4185	111	0.9378	2.04543
23	0.05	0.6175	0.1	0.7409	0.125	0.7665	0.2	0.8212	0.25	0.8501	0.5	0.9725	0.75	1.1168	0.8	1.158	0.875	1.2403	0.9	1.2786	0.95	1.3968	111	0.9315	2.10052
24	0.05	0.5834	0.1	0.7272	0.125	0.7528	0.2	0.8061	0.25	0.8334	0.5	0.9517	0.75	1.0927	0.8	1.1329	0.875	1.2129	0.9	1.2498	0.95	1.3617	111	0.9124	2.18671
25	0.05	0.5708	0.1	0.705	0.125	0.7297	0.2	0.7809	0.25	0.8081	0.5	0.9216	0.75	1.0589	0.8	1.098	0.875	1.1743	0.9	1.2095	0.95	1.3164	111	0.8818	2.28082
26	0.05	0.5763	0.1	0.6745	0.125	0.6991	0.2	0.7479	0.25	0.7737	0.5	0.8827	0.75	1.0159	0.8	1.0529	0.875	1.125	0.9	1.1583	0.95	1.2597	111	0.8499	2.40948
27	0.05	0.5814	0.1	0.6441	0.125	0.6647	0.2	0.7092	0.25	0.7333	0.5	0.8369	0.75	0.9641	0.8	0.9991	0.875	1.0673	0.9	1.0991	0.95	1.1934	111	0.824	2.57808
28	0.05	0.5745	0.1	0.6173	0.125	0.6333	0.2	0.6702	0.25	0.6913	0.5	0.7868	0.75	0.906	0.8	0.9389	0.875	1.0028	0.9	1.0332	0.95	1.121	111	0.7627	2.70685
29	0.05	0.5522	0.1	0.5873	0.125	0.6005	0.2	0.6325	0.25	0.6512	0.5	0.7367	0.75	0.8454	0.8	0.8754	0.875	0.9346	0.9	0.9626	0.95	1.0453	111	0.7018	3.00392
30	0.05	0.5145	0.1	0.5475	0.125	0.5595	0.2	0.59	0.25	0.6078	0.5	0.688	0.75	0.7874	0.8	0.8145	0.875	0.8683	0.9	0.8939	0.95	0.9693	111	0.6485	3.19723
31	0.05	0.4737	0.1	0.5039	0.125	0.5153	0.2	0.5441	0.25	0.5605	0.5	0.636	0.75	0.7311	0.8	0.756	0.875	0.8072	0.9	0.8312	0.95	0.8993	111	0.597	3.39152
32	0.05	0.43515	0.1	0.4625	0.125	0.47265	0.2	0.4991	0.25	0.51405	0.5	0.5838	0.75	0.67245	0.8	0.69645	0.875	0.74565	0.9	0.76765	0.95	0.8328	111	0.54805	3.67598
33	0.05	0.40045	0.1	0.4248	0.125	0.43395	0.2	0.45765	0.25	0.4711	0.5	0.53395	0.75	0.61425	0.8	0.6363	0.875	0.68185	0.9	0.70145	0.95	0.76185	111	0.5023	4.06948
34	0.05	0.36965	0.1	0.39125	0.125	0.39955	0.2	0.4205	0.25	0.4327	0.5	0.48855	0.75	0.5593	0.8	0.5788	0.875	0.61755	0.9	0.6354	0.95	0.6885	111	0.46035	4.56957
35	0.05	0.34285	0.1	0.3622	0.125	0.3696	0.2	0.38815	0.25	0.39905	0.5	0.4481	0.75	0.5092	0.8	0.5255	0.875	0.55835	0.9	0.57395	0.95	0.6197	111	0.42	5.20281
36	0.05	0.3203	0.1	0.3374	0.125	0.34405	0.2	0.36025	0.25	0.37	0.5	0.41275	0.75	0.46535	0.8	0.4796	0.875	0.5077	0.9	0.5211	0.95	0.56205	111	0.3939	5.96865
37	0.05	0.30106	0.1	0.31651	0.125	0.32244	0.2	0.33689	0.25	0.34543	0.5	0.38312	0.75	0.42933	0.8	0.44189	0.875	0.46719	0.9	0.47887	0.95	0.5154	111	0.36805	6.83322
38	0.05	0.28505	0.1	0.29944	0.125	0.30477	0.2	0.31817	0.25	0.32583	0.5	0.35979	0.75	0.40108	0.8	0.41286	0.875	0.43554	0.9	0.44637	0.95	0.47928	111	0.34675	7.58561
39	0.05	0.27279	0.1	0.28656	0.125	0.29169	0.2	0.30424	0.25	0.31136	0.5	0.34276	0.75	0.38079	0.8	0.39149	0.875	0.41266	0.9	0.42261	0.95	0.45254	111	0.33169	8.15507
40	0.05	0.26451	0.1	0.27752	0.125	0.28251	0.2	0.29472	0.25	0.30167	0.5	0.3316	0.75	0.36741	0.8	0.37781	0.875	0.39806	0.9	0.40715	0.95	0.43577	111	0.3247	8.54332
41	0.05	0.25875	0.1	0.27165	0.125	0.27654	0.2	0.28869	0.25	0.29562	0.5	0.32564	0.75	0.36163	0.8	0.37196	0.875	0.39211	0.9	0.40125	0.95	0.4297	111	0.31432	8.53039
42	0.05	0.25532	0.1	0.26844	0.125	0.27321	0.2	0.28567	0.25	0.29282	0.5	0.32382	0.75	0.36245	0.8	0.37338	0.875	0.39596	0.9	0.4067	0.95	0.43865	111	0.3088	8.2575
43	0.05	0.25464	0.1	0.26826	0.125	0.27318	0.2	0.28585	0.25	0.29314	0.5	0.32546	0.75	0.36731	0.8	0.37992	0.875	0.40714	0.9	0.4206	0.95	0.46403	111	0.30998	7.90055
44	0.05	0.25744	0.1	0.27147	0.125	0.27663	0.2	0.28984	0.25	0.29732	0.5	0.33139	0.75	0.37605	0.8	0.39018	0.875	0.42209	0.9	0.43954	0.95	0.50183	111	0.31254	7.53863
45	0.05	0.26377	0.1	0.27831	0.125	0.28385	0.2	0.29778	0.25	0.30552	0.5	0.3415	0.75	0.38932	0.8	0.40439	0.875	0.44063	0.9	0.46173	0.95	0.54281	111	0.32013	7.12704
46	0.05	0.2736	0.1	0.28913	0.125	0.295	0.2	0.30967	0.25	0.31786	0.5	0.3562	0.75	0.40734	0.8	0.42343	0.875	0.46343	0.9	0.48676	0.95	0.57639	111	0.33414	6.66583
47	0.05	0.28725	0.1	0.30393	0.125	0.31017	0.2	0.32582	0.25	0.33465	0.5	0.37565	0.75	0.43002	0.8	0.44727	0.875	0.48961	0.9	0.51304	0.95	0.59492	111	0.35218	6.23041
48	0.05	0.30505	0.1	0.32289	0.125	0.32959	0.2	0.34629	0.25	0.3558	0.5	0.39975	0.75	0.45702	0.8	0.47502	0.875	0.51569	0.9	0.5365	0.95	0.59957	111	0.37483	5.82287
49	0.05	0.32711	0.1	0.34603	0.125	0.35343	0.2	0.37117	0.25	0.38137	0.5	0.4279	0.75	0.4861	0.8	0.50325	0.875	0.53766	0.9	0.55343	0.95	0.6019	111	0.40279	5.49829
50	0.05	0.35272	0.1	0.37264	0.125	0.3803	0.2	0.39929	0.25	0.40996	0.5	0.45797	0.75	0.51468	0.8	0.53029	0.875	0.56089	0.9	0.57528	0.95	0.61846	111	0.43741	5.31016
51	0.05	0.3761	0.1	0.3987	0.125	0.4069	0.2	0.4273	0.25	0.4389	0.5	0.4892	0.75	0.54785	0.8	0.56415	0.875	0.59575	0.9	0.6103	0.95	0.65335	111	0.4679	5.07673
52	0.05	0.39035	0.1	0.4221	0.125	0.43245	0.2	0.4572	0.25	0.4708	0.5	0.52625	0.75	0.58845	0.8	0.60545	0.875	0.63765	0.9	0.6524	0.95	0.69605	111	0.5117	4.66336
53	0.05	0.3995	0.1	0.4496	0.125	0.46385	0.2	0.49325	0.25	0.508	0.5	0.56695	0.75	0.63165	0.8	0.6492	0.875	0.6832	0.9	0.69865	0.95	0.74485	111	0.5549	4.45582
54	0.05	0.4086	0.1	0.48155	0.125	0.49765	0.2	0.53015	0.25	0.54605	0.5	0.60835	0.75	0.6774	0.8	0.696	0.875	0.7325	0.9	0.74915	0.95	0.7999	111	0.59545	4.2194
55	0.05	0.4277	0.1	0.5102	0.125	0.52855	0.2	0.5649	0.25	0.58255	0.5	0.6508	0.75	0.72465	0.8	0.7445	0.875	0.7843	0.9	0.80245	0.95	0.85655	111	0.6385	3.89267
56	0.05	0.4535	0.1	0.53275	0.125	0.555	0.2	0.59795	0.25	0.61825	0.5	0.6931	0.75	0.7716	0.8	0.793	0.875	0.83565	0.9	0.85525	0.95	0.9137	111	0.68325	3.60513
57	0.05	0.48505	0.1	0.5568	0.125	0.58255	0.2	0.63055	0.25	0.65245	0.5	0.73285	0.75	0.8162	0.8	0.83855	0.875	0.88515	0.9	0.9058	0.95	0.9687	111	0.72415	3.40488
58	0.05	0.5195	0.1	0.59285	0.125	0.6155	0.2	0.66175	0.25	0.68445	0.5	0.768	0.75	0.85615	0.8	0.88055	0.875	0.92975	0.9	0.9518	0.95	1.01835	111	0.75815	3.23865
59	0.05	0.55845	0.1	0.63045	0.125	0.64975	0.2	0.6913	0.25	0.71275	0.5	0.7982	0.75	0.8904	0.8	0.9164	0.875	0.96845	0.9	0.9918	0.95	1.0604	111	0.78845	3.11202
60	0.05	0.58215	0.1	0.6555	0.125	0.6744	0.2	0.7152	0.25	0.7361	0.5	0.82265	0.75	0.91855	0.8	0.94565	0.875	0.99955	0.9	1.02405	0.95	1.095	111	0.80975	3.03306
61	0.05	0.5899	0.1	0.667	0.125	0.68645	0.2	0.72865	0.25	0.75	0.5	0.83915	0.75	0.93835	0.8	0.966	0.875	1.02195	0.9	1.04725	0.95	1.11985	111	0.83125	2.94487
62	0.05	0.5896	0.1	0.668	0.125	0.6881	0.2	0.73135	0.25	0.75365	0.5	0.845	0.75	0.9471	0.8	0.9754	0.875	1.0331	0.9	1.05865	0.95	1.13395	111	0.82655	2.84823
63	0.05	0.58365	0.1	0.662	0.125	0.682	0.2	0.72565	0.25	0.74805	0.5	0.8408	0.75	0.94475	0.8	0.9729	0.875	1.03115	0.9	1.0571	0.95	1.13485	111	0.81705	2.80493
64	0.05	0.57415	0.1	0.6485	0.125	0.6685	0.2	0.7122	0.25	0.73455	0.5	0.8278	0.75	0.93235	0.8	0.9607	0.875	1.01865	0.9	1.04515	0.95	1.12505	111	0.81095	2.79976
65	0.05	0.5606	0.1	0.62845	0.125	0.64855	0.2	0.6925	0.25	0.7154	0.5	0.8094	0.75	0.91375	0.8	0.942	0.875	0.9996	0.9	1.0266	0.95	1.1073	111	0.78875	2.76633
66	0.05	0.5477	0.1	0.60705	0.125	0.6266	0.2	0.67015	0.25	0.69335	0.5	0.78795	0.75	0.89115	0.8	0.9193	0.875	0.9764	0.9	1.0028	0.95	1.0835	111	0.77305	2.76501
67	0.05	0.54045	0.1	0.58985	0.125	0.60805	0.2	0.6502	0.25	0.6731	0.5	0.7656	0.75	0.86645	0.8	0.89425	0.875	0.95075	0.9	0.9766	0.95	1.05595	111	0.75305	2.83335
68	0.05	0.5379	0.1	0.58125	0.125	0.5972	0.2	0.6354	0.25	0.65625	0.5	0.7444	0.75	0.8417	0.8	0.8689	0.875	0.92395	0.9	0.9492	0.95	1.0256	111	0.7286	2.9629
69	0.05	0.53735	0.1	0.5765	0.125	0.5908	0.2	0.62535	0.25	0.6445	0.5	0.72625	0.75	0.81945	0.8	0.8462	0.875	0.89945	0.9	0.92385	0.95	0.9976	111	0.70345	3.15336
70	0.05	0.53865	0.1	0.5735	0.125	0.58615	0.2	0.61815	0.25	0.6359	0.5	0.7129	0.75	0.80295	0.8	0.8294	0.875	0.88135	0.9	0.90495	0.95	0.97665	111	0.6892	3.32959
71	0.05	0.53855	0.1	0.57115	0.125	0.58335	0.2	0.6136	0.25	0.6304	0.5	0.7052	0.75	0.79535	0.8	0.82145	0.875	0.8735	0.9	0.89735	0.95	0.971	111	0.6755	3.41665
72	0.05	0.53345	0.1	0.5662	0.125	0.5786	0.2	0.6092	0.25	0.6262	0.5	0.7025	0.75	0.7979	0.8	0.8258	0.875	0.88305	0.9	0.9092	0.95	0.98645	111	0.67175	3.34087
73	0.05	0.5293	0.1	0.56165	0.125	0.5742	0.2	0.605	0.25	0.6224	0.5	0.701	0.75	0.8082	0.8	0.8413	0.875	0.9119	0.9	0.9444	0.95	1.0403	111	0.65645	3.25086
74	0.05	0.52945	0.1	0.56125	0.125	0.57365	0.2	0.6049	0.25	0.62255	0.5	0.7023	0.75	0.81685	0.8	0.8553	0.875	0.9535	0.9	1.0031	0.95	1.1318	111	0.65465	3.22064
75	0.05	0.53445	0.1	0.5663	0.125	0.57895	0.2	0.6103	0.25	0.6284	0.5	0.7102	0.75	0.8292	0.8	0.8703	0.875	0.9891	0.9	1.06285	0.95	1.2386	111	0.66335	3.14879
76	0.05	0.54495	0.1	0.57735	0.125	0.5903	0.2	0.6222	0.25	0.64075	0.5	0.7259	0.75	0.8491	0.8	0.89285	0.875	1.0241	0.9	1.1129	0.95	1.32335	111	0.6845	3.03107
77	0.05	0.56135	0.1	0.59495	0.125	0.6084	0.2	0.64135	0.25	0.66055	0.5	0.74985	0.75	0.87865	0.8	0.9247	0.875	1.0613	0.9	1.15155	0.95	1.362	111	0.7104	2.9034
78	0.05	0.5845	0.1	0.62	0.125	0.6338	0.2	0.6683	0.25	0.6885	0.5	0.7829	0.75	0.9185	0.8	0.9668	0.875	1.0987	0.9	1.174	0.95	1.3573	111	0.7414	2.72172
79	0.05	0.6152	0.1	0.6526	0.125	0.6672	0.2	0.7038	0.25	0.7253	0.5	0.8256	0.75	0.9673	0.8	1.0157	0.875	1.1262	0.9	1.1813	0.95	1.3329	111	0.7791	2.54579
80	0.05	0.6534	0.1	0.6935	0.125	0.7092	0.2	0.7482	0.25	0.7712	0.5	0.8776	0.75	1.0181	0.8	1.0607	0.875	1.1515	0.9	1.194	0.95	1.3206	111	0.8239	2.396
81	0.05	0.6996	0.1	0.7421	0.125	0.759	0.2	0.8004	0.25	0.8244	0.5	0.9339	0.75	1.0704	0.8	1.1107	0.875	1.193	0.9	1.2312	0.95	1.3505	111	0.8837	2.32728
82	0.05	0.7487	0.1	0.7938	0.125	0.8113	0.2	0.8555	0.25	0.8809	0.5	0.996	0.75	1.1369	0.8	1.1775	0.875	1.2612	0.9	1.2986	0.95	1.4204	111	0.9443	2.21678
83	0.05	0.7948	0.1	0.8472	0.125	0.8668	0.2	0.9162	0.25	0.944	0.5	1.0689	0.75	1.2206	0.8	1.2631	0.875	1.3518	0.9	1.3929	0.95	1.5259	111	1.0158	2.04206
84	0.05	0.8433	0.1	0.9057	0.125	0.9287	0.2	0.9847	0.25	1.0164	0.5	1.154	0.75	1.3199	0.8	1.3664	0.875	1.4641	0.9	1.5103	0.95	1.6545	111	1.0996	1.86521
85	0.05	0.8961	0.1	0.9714	0.125	0.9982	0.2	1.0621	0.25	1.0979	0.5	1.2504	0.75	1.434	0.8	1.4856	0.875	1.5928	0.9	1.6426	0.95	1.7994	111	1.1859	1.69144
86	0.05	0.9598	0.1	1.0464	0.125	1.0766	0.2	1.1483	0.25	1.1885	0.5	1.3572	0.75	1.5587	0.8	1.615	0.875	1.7317	0.9	1.7856	0.95	1.9557	111	1.2916	1.52893
87	0.05	1.0341	0.1	1.1325	0.125	1.1661	0.2	1.2449	0.25	1.2879	0.5	1.4703	0.75	1.6886	0.8	1.7507	0.875	1.8765	0.9	1.9358	0.95	2.119	111	1.4007	1.41116
88	0.05	1.1161	0.1	1.2268	0.125	1.2636	0.2	1.3466	0.25	1.3916	0.5	1.5852	0.75	1.8214	0.8	1.8881	0.875	2.025	0.9	2.0883	0.95	2.286	111	1.5037	1.32395
89	0.05	1.1892	0.1	1.3191	0.125	1.3572	0.2	1.4449	0.25	1.4914	0.5	1.6969	0.75	1.9509	0.8	2.0228	0.875	2.1698	0.9	2.2386	0.95	2.4501	111	1.6	1.25087
90	0.05	1.2528	0.1	1.3963	0.125	1.4365	0.2	1.5293	0.25	1.5782	0.5	1.7968	0.75	2.07	0.8	2.1473	0.875	2.3034	0.9	2.3768	0.95	2.604	111	1.6912	1.17863
91	0.05	1.3047	0.1	1.4542	0.125	1.4969	0.2	1.5936	0.25	1.6459	0.5	1.8781	0.75	2.1684	0.8	2.252	0.875	2.4174	0.9	2.4952	0.95	2.7374	111	1.7792	1.11097
92	0.05	1.3441	0.1	1.4878	0.125	1.5334	0.2	1.6332	0.25	1.6876	0.5	1.9316	0.75	2.2389	0.8	2.3267	0.875	2.5034	0.9	2.5861	0.95	2.8415	111	1.8181	1.04905
93	0.05	1.3576	0.1	1.4948	0.125	1.5414	0.2	1.6443	0.25	1.7008	0.5	1.9558	0.75	2.2787	0.8	2.3708	0.875	2.5593	0.9	2.6458	0.95	2.9113	111	1.8567	1.00579
94	0.05	1.3382	0.1	1.4732	0.125	1.5216	0.2	1.6283	0.25	1.688	0.5	1.9528	0.75	2.2897	0.8	2.3847	0.875	2.5799	0.9	2.672	0.95	2.9431	111	1.8622	0.971196
95	0.05	1.2953	0.1	1.4296	0.125	1.4796	0.2	1.5936	0.25	1.6557	0.5	1.9283	0.75	2.2702	0.8	2.3676	0.875	2.5681	0.9	2.6614	0.95	2.9369	111	1.8264	0.946359
96	0.05	1.2337	0.1	1.3816	0.125	1.4325	0.2	1.5485	0.25	1.6104	0.5	1.8828	0.75	2.2231	0.8	2.3204	0.875	2.5216	0.9	2.6136	0.95	2.8906	111	1.7776	0.947636
97	0.05	1.1612	0.1	1.328	0.125	1.3791	0.2	1.4926	0.25	1.5532	0.5	1.8187	0.75	2.1518	0.8	2.2469	0.875	2.4436	0.9	2.5343	0.95	2.8085	111	1.7148	0.973743
98	0.05	1.0882	0.1	1.2628	0.125	1.3126	0.2	1.4241	0.25	1.4827	0.5	1.7384	0.75	2.0594	0.8	2.1523	0.875	2.3419	0.9	2.4298	0.95	2.6979	111	1.6381	1.01165
99	0.05	1.0366	0.1	1.1886	0.125	1.2363	0.2	1.3424	0.25	1.3988	0.5	1.6448	0.75	1.9533	0.8	2.0423	0.875	2.2222	0.9	2.3071	0.95	2.5661	111	1.5546	1.05262
100	0.05	1.0025	0.1	1.1188	0.125	1.1594	0.2	1.255	0.25	1.3079	0.5	1.5417	0.75	1.8367	0.8	1.9218	0.875	2.0917	0.9	2.1729	0.95	2.4232	111	1.4464	1.10079
101	0.05	0.9727	0.1	1.0575	0.125	1.0905	0.2	1.1723	0.25	1.2193	0.5	1.4335	0.75	1.7136	0.8	1.7936	0.875	1.9563	0.9	2.0339	0.95	2.2756	111	1.3339	1.19738
102	0.05	0.9319	0.1	1.0017	0.125	1.0285	0.2	1.0985	0.25	1.1392	0.5	1.3307	0.75	1.5897	0.8	1.6649	0.875	1.8193	0.9	1.8944	0.95	2.1292	111	1.2255	1.34272
103	0.05	0.8716	0.1	0.9366	0.125	0.9621	0.2	1.0265	0.25	1.0638	0.5	1.239	0.75	1.4771	0.8	1.5463	0.875	1.6924	0.9	1.7636	0.95	1.9885	111	1.1324	1.46439
104	0.05	0.8063	0.1	0.866	0.125	0.8895	0.2	0.9496	0.25	0.9848	0.5	1.1515	0.75	1.3787	0.8	1.4445	0.875	1.5866	0.9	1.6542	0.95	1.8712	111	1.0414	1.53712
105	0.05	0.7462	0.1	0.8009	0.125	0.8224	0.2	0.8767	0.25	0.9088	0.5	1.0638	0.75	1.2847	0.8	1.351	0.875	1.4943	0.9	1.5629	0.95	1.774	111	0.9531	1.67317
106	0.05	0.6934	0.1	0.7435	0.125	0.7629	0.2	0.8125	0.25	0.8416	0.5	0.9833	0.75	1.19	0.8	1.2559	0.875	1.4023	0.9	1.4695	0.95	1.6755	111	0.8806	1.83304
107	0.05	0.649	0.1	0.6941	0.125	0.7122	0.2	0.7575	0.25	0.7837	0.5	0.9135	0.75	1.1024	0.8	1.1635	0.875	1.3029	0.9	1.3688	0.95	1.5608	111	0.8189	2.01318
108	0.05	0.6116	0.1	0.6529	0.125	0.6694	0.2	0.7111	0.25	0.7356	0.5	0.8543	0.75	1.0254	0.8	1.0794	0.875	1.2011	0.9	1.2597	0.95	1.43	111	0.7664	2.18832
109	0.05	0.5811	0.1	0.6189	0.125	0.6344	0.2	0.6731	0.25	0.6961	0.5	0.8053	0.75	0.959	0.8	1.0064	0.875	1.1065	0.9	1.1534	0.95	1.3	111	0.7318	2.3625
110	0.05	0.5565	0.1	0.5923	0.125	0.6065	0.2	0.6431	0.25	0.6645	0.5	0.766	0.75	0.9013	0.8	0.942	0.875	1.0248	0.9	1.0627	0.95	1.1843	111	0.7039	2.53356
111	0.05	0.5378	0.1	0.5717	0.125	0.585	0.2	0.6199	0.25	0.6402	0.5	0.7343	0.75	0.8556	0.8	0.8902	0.875	0.9623	0.9	0.996	0.95	1.1	111	0.681	2.71167
112	0.05	0.52355	0.1	0.556	0.125	0.56895	0.2	0.60215	0.25	0.62165	0.5	0.71005	0.75	0.82225	0.8	0.85415	0.875	0.91935	0.9	0.9515	0.95	1.0466	111	0.66315	2.88213
113	0.05	0.5129	0.1	0.54525	0.125	0.55805	0.2	0.5904	0.25	0.60925	0.5	0.69455	0.75	0.8018	0.8	0.83255	0.875	0.8947	0.9	0.92565	0.95	1.01875	111	0.6474	3.01624
114	0.05	0.5072	0.1	0.54035	0.125	0.55315	0.2	0.58535	0.25	0.60395	0.5	0.68825	0.75	0.79335	0.8	0.8239	0.875	0.88495	0.9	0.9148	0.95	1.00675	111	0.6449	3.01882
115	0.05	0.50805	0.1	0.54165	0.125	0.5547	0.2	0.58725	0.25	0.60575	0.5	0.69045	0.75	0.7955	0.8	0.8252	0.875	0.88715	0.9	0.91635	0.95	1.0074	111	0.64915	3.00258
116	0.05	0.5142	0.1	0.5485	0.125	0.56195	0.2	0.5954	0.25	0.6141	0.5	0.70035	0.75	0.80645	0.8	0.8368	0.875	0.8994	0.9	0.92905	0.95	1.0203	111	0.6596	2.95446
117	0.05	0.5234	0.1	0.5595	0.125	0.5735	0.2	0.6081	0.25	0.6275	0.5	0.7167	0.75	0.8253	0.8	0.8571	0.875	0.9212	0.9	0.9512	0.95	1.0447	111	0.6755	2.84975
118	0.05	0.5353	0.1	0.5731	0.125	0.5878	0.2	0.6238	0.25	0.6442	0.5	0.7379	0.75	0.8507	0.8	0.8836	0.875	0.9503	0.9	0.982	0.95	1.0795	111	0.6949	2.71332
119	0.05	0.5489	0.1	0.589	0.125	0.604	0.2	0.6414	0.25	0.663	0.5	0.7612	0.75	0.8795	0.8	0.9135	0.875	0.9837	0.9	1.0171	0.95	1.1207	111	0.7166	2.59158
120	0.05	0.5641	0.1	0.6057	0.125	0.6215	0.2	0.6603	0.25	0.6828	0.5	0.7852	0.75	0.908	0.8	0.9434	0.875	1.0168	0.9	1.0514	0.95	1.1586	111	0.7412	2.49146
121	0.05	0.5793	0.1	0.6229	0.125	0.6391	0.2	0.6793	0.25	0.7027	0.5	0.8078	0.75	0.9329	0.8	0.9694	0.875	1.0446	0.9	1.0792	0.95	1.1868	111	0.7679	2.43592
122	0.05	0.5935	0.1	0.6381	0.125	0.6548	0.2	0.6964	0.25	0.7206	0.5	0.8256	0.75	0.952	0.8	0.9885	0.875	1.0643	0.9	1.0996	0.95	1.2041	111	0.7866	2.42995
123	0.05	0.6041	0.1	0.6491	0.125	0.666	0.2	0.7081	0.25	0.732	0.5	0.8372	0.75	0.9651	0.8	1.0019	0.875	1.078	0.9	1.1136	0.95	1.2202	111	0.7955	2.42419
124	0.05	0.6039	0.1	0.6499	0.125	0.6669	0.2	0.7097	0.25	0.7343	0.5	0.8429	0.75	0.9742	0.8	1.0118	0.875	1.0901	0.9	1.127	0.95	1.2369	111	0.7982	2.34735
125	0.05	0.5868	0.1	0.638	0.125	0.6574	0.2	0.7044	0.25	0.731	0.5	0.8454	0.75	0.9804	0.8	1.0184	0.875	1.0977	0.9	1.1355	0.95	1.247	111	0.8066	2.24272
126	0.05	0.5544	0.1	0.6229	0.125	0.6459	0.2	0.698	0.25	0.7257	0.5	0.8432	0.75	0.9787	0.8	1.017	0.875	1.096	0.9	1.1329	0.95	1.2446	111	0.8101	2.1993
127	0.05	0.5161	0.1	0.6091	0.125	0.6344	0.2	0.6886	0.25	0.7169	0.5	0.8338	0.75	0.9673	0.8	1.0056	0.875	1.0832	0.9	1.1192	0.95	1.2299	111	0.8034	2.20755
128	0.05	0.4825	0.1	0.5939	0.125	0.6196	0.2	0.6733	0.25	0.7013	0.5	0.816	0.75	0.9462	0.8	0.9841	0.875	1.0599	0.9	1.0944	0.95	1.2028	111	0.7781	2.25078
129	0.05	0.4639	0.1	0.5744	0.125	0.5998	0.2	0.652	0.25	0.679	0.5	0.7899	0.75	0.9168	0.8	0.9526	0.875	1.0255	0.9	1.0595	0.95	1.163	111	0.753	2.33504
130	0.05	0.4622	0.1	0.5503	0.125	0.575	0.2	0.625	0.25	0.6506	0.5	0.7569	0.75	0.8786	0.8	0.9129	0.875	0.9832	0.9	1.0147	0.95	1.1127	111	0.7228	2.44808
131	0.05	0.46725	0.1	0.52715	0.125	0.54785	0.2	0.5939	0.25	0.6183	0.5	0.71845	0.75	0.83435	0.8	0.86665	0.875	0.93275	0.9	0.96305	0.95	1.05555	111	0.6896	2.59116
132	0.05	0.4661	0.1	0.50845	0.125	0.52435	0.2	0.56305	0.25	0.58455	0.5	0.67655	0.75	0.7858	0.8	0.8165	0.875	0.8772	0.9	0.90575	0.95	0.9919	111	0.64695	2.80843
133	0.05	0.45345	0.1	0.48835	0.125	0.50165	0.2	0.53465	0.25	0.5534	0.5	0.6351	0.75	0.7354	0.8	0.76385	0.875	0.81985	0.9	0.8459	0.95	0.92555	111	0.6049	3.14181
134	0.05	0.42805	0.1	0.46075	0.125	0.4729	0.2	0.50365	0.25	0.5209	0.5	0.5965	0.75	0.68765	0.8	0.71325	0.875	0.76365	0.9	0.7875	0.95	0.86005	111	0.57055	3.40922
135	0.05	0.399	0.1	0.4294	0.125	0.44075	0.2	0.4691	0.25	0.48545	0.5	0.5574	0.75	0.64345	0.8	0.66725	0.875	0.71355	0.9	0.73465	0.95	0.8004	111	0.53055	3.56142
136	0.05	0.3716	0.1	0.3989	0.125	0.4093	0.2	0.43535	0.25	0.4502	0.5	0.5171	0.75	0.59855	0.8	0.62185	0.875	0.66685	0.9	0.6865	0.95	0.7463	111	0.48955	3.80273
137	0.05	0.34725	0.1	0.37155	0.125	0.3809	0.2	0.40435	0.25	0.4178	0.5	0.47845	0.75	0.5534	0.8	0.57525	0.875	0.61795	0.9	0.6373	0.95	0.6934	111	0.4491	4.18577
138	0.05	0.3264	0.1	0.3479	0.125	0.3563	0.2	0.377	0.25	0.389	0.5	0.4431	0.75	0.5103	0.8	0.52955	0.875	0.56835	0.9	0.5858	0.95	0.6373	111	0.4172	4.70939
139	0.05	0.30915	0.1	0.3281	0.125	0.33525	0.2	0.35375	0.25	0.36425	0.5	0.41195	0.75	0.4711	0.8	0.48765	0.875	0.5208	0.9	0.53575	0.95	0.58115	111	0.3903	5.35755
140	0.05	0.29505	0.1	0.31175	0.125	0.3182	0.2	0.3343	0.25	0.34365	0.5	0.3856	0.75	0.43655	0.8	0.45085	0.875	0.47935	0.9	0.4923	0.95	0.5316	111	0.3679	6.07549
141	0.05	0.28313	0.1	0.29852	0.125	0.30428	0.2	0.31855	0.25	0.32681	0.5	0.36399	0.75	0.40864	0.8	0.4212	0.875	0.44608	0.9	0.45754	0.95	0.49189	111	0.34912	6.86731
142	0.05	0.2734	0.1	0.28758	0.125	0.29303	0.2	0.30626	0.25	0.31379	0.5	0.34737	0.75	0.38788	0.8	0.39909	0.875	0.42171	0.9	0.43197	0.95	0.46311	111	0.33466	7.60187
143	0.05	0.26585	0.1	0.27939	0.125	0.28464	0.2	0.2976	0.25	0.3047	0.5	0.33635	0.75	0.37462	0.8	0.38515	0.875	0.40609	0.9	0.41572	0.95	0.44459	111	0.32347	8.02049
144	0.05	0.26088	0.1	0.27432	0.125	0.27954	0.2	0.29226	0.25	0.29929	0.5	0.33051	0.75	0.36816	0.8	0.37861	0.875	0.39935	0.9	0.40861	0.95	0.43691	111	0.31547	8.1369
145	0.05	0.25854	0.1	0.27214	0.125	0.27739	0.2	0.29027	0.25	0.29739	0.5	0.32943	0.75	0.36844	0.8	0.37937	0.875	0.40134	0.9	0.41153	0.95	0.44157	111	0.31151	7.94615
146	0.05	0.2586	0.1	0.27262	0.125	0.27799	0.2	0.29121	0.25	0.29873	0.5	0.33279	0.75	0.37515	0.8	0.38753	0.875	0.41303	0.9	0.42463	0.95	0.45995	111	0.31433	7.51326
147	0.05	0.26103	0.1	0.27576	0.125	0.28135	0.2	0.29534	0.25	0.30339	0.5	0.34001	0.75	0.38783	0.8	0.40274	0.875	0.434	0.9	0.4481	0.95	0.49193	111	0.31725	7.01428
148	0.05	0.26613	0.1	0.28191	0.125	0.28786	0.2	0.30278	0.25	0.31143	0.5	0.35141	0.75	0.40603	0.8	0.42406	0.875	0.46264	0.9	0.48098	0.95	0.53585	111	0.32654	6.40802
149	0.05	0.27429	0.1	0.29122	0.125	0.29784	0.2	0.31406	0.25	0.3234	0.5	0.36755	0.75	0.42971	0.8	0.45081	0.875	0.49711	0.9	0.51919	0.95	0.58562	111	0.33955	5.83725
150	0.05	0.28563	0.1	0.30432	0.125	0.3115	0.2	0.32949	0.25	0.33957	0.5	0.38872	0.75	0.45913	0.8	0.48313	0.875	0.53494	0.9	0.55975	0.95	0.63223	111	0.35562	5.24627
151	0.05	0.30065	0.1	0.3212	0.125	0.3293	0.2	0.3491	0.25	0.3604	0.5	0.4154	0.75	0.49365	0.8	0.51965	0.875	0.5735	0.9	0.5989	0.95	0.6699	111	0.37665	4.67806
152	0.05	0.3195	0.1	0.3424	0.125	0.3512	0.2	0.3732	0.25	0.38595	0.5	0.44745	0.75	0.53145	0.8	0.5581	0.875	0.6091	0.9	0.6327	0.95	0.6991	111	0.4064	4.17179
153	0.05	0.3424	0.1	0.3677	0.125	0.3776	0.2	0.4021	0.25	0.4163	0.5	0.48385	0.75	0.56945	0.8	0.5942	0.875	0.64275	0.9	0.66445	0.95	0.72745	111	0.4436	3.78522
154	0.05	0.36925	0.1	0.39715	0.125	0.4077	0.2	0.43475	0.25	0.4503	0.5	0.5212	0.75	0.60625	0.8	0.63095	0.875	0.6792	0.9	0.70155	0.95	0.7685	111	0.489	3.59381
155	0.05	0.3971	0.1	0.42735	0.125	0.4387	0.2	0.4679	0.25	0.48435	0.5	0.55875	0.75	0.648	0.8	0.67365	0.875	0.72655	0.9	0.75065	0.95	0.82565	111	0.52465	3.43341
156	0.05	0.4194	0.1	0.45425	0.125	0.46735	0.2	0.4997	0.25	0.5182	0.5	0.59955	0.75	0.69775	0.8	0.72655	0.875	0.78525	0.9	0.8121	0.95	0.8947	111	0.56475	3.14072
157	0.05	0.4354	0.1	0.4794	0.125	0.4952	0.2	0.5332	0.25	0.5545	0.5	0.6459	0.75	0.7544	0.8	0.7856	0.875	0.8486	0.9	0.878	0.95	0.9684	111	0.612	2.81043
158	0.05	0.447	0.1	0.5047	0.125	0.5247	0.2	0.57	0.25	0.5945	0.5	0.6965	0.75	0.8133	0.8	0.8466	0.875	0.9136	0.9	0.9461	0.95	1.0427	111	0.6731	2.55307
