# Supplementary material for: Time-varying asymmetry and tail thickness in long series of daily financial returns
Source: publisher site journal article supplement (doi:10.1515/snde-2017-0071), 2018-10-02
Supplement: Supplementary file 325 [file Logl_max.xlsx]

## Sheet: 1
	Var1
1	-16456.7
