# Supplementary material for: Time-varying asymmetry and tail thickness in long series of daily financial returns
Source: publisher site journal article supplement (doi:10.1515/snde-2017-0071), 2018-10-02
Supplement: Supplementary file 329 [file acc_summary.xlsx]

## Sheet: 1
	Var1	Var2	Var3	Var4	Var5
1	0.0790636	0.111446	0.116325	0.149685	0.216616
2	0.0704504	0.0916515	0.0967419	0.0880872	0.216616
3	0.0753979	0.0804699	0.0719305	0.0484424	0.216616
4	0.0623075	0.00365186	0.00222247	0.00100518	0.216616
5	0.17717	0.193	0.230173	0.305686	0.216616
6	0.160433	0.159999	0.187716	0.177143	0.216616
7	0.183958	0.175294	0.183944	0.164407	0.216616
8	0.19122	0.184488	0.110948	0.0655444	0.216616
