# Supplementary material for: Time-varying asymmetry and tail thickness in long series of daily financial returns
Source: publisher site journal article supplement (doi:10.1515/snde-2017-0071), 2018-10-02
Supplement: Supplementary file 331 [file add_par_res.xlsx]

## Sheet: 1
	(a1+a2)/2+b1	a0/[1-(a1+a2)/2-b1]	[a0/(1-(a1+a2)/2-b1)]^0.5	alpha1/alpha2	ni2/ni1	per_1	per_2	per_3	per_4	per_5	per_6
1	0.984681	0.785655	0.884623	16.2751	1.47521	40.2705	31.574	13.5516	39.2436	8.46595	7.32816
2	0.00273389	0.101744	0.0556587	18.2298	0.259979	0.985884	3.15041	0.293518	1.81942	0.36255	0.79863
