# Supplementary material for: Time-varying asymmetry and tail thickness in long series of daily financial returns
Source: publisher site journal article supplement (doi:10.1515/snde-2017-0071), 2018-10-02
Supplement: Supplementary file 333 [file cvm1.xlsx]

## Sheet: 1
	Var1	Var2	Var3	Var4	Var5	Var6	Var7	Var8	Var9	Var10	Var11	Var12	Var13	Var14	Var15	Var16	Var17	Var18	Var19	Var20	Var21	Var22	Var23	Var24	Var25
1	0.000303508	-2.88326e-05	-0.000593347	-1.82756e-05	0.000209839	0.000446224	-0.00043692	-0.000100826	-0.000182358	1.72864e-05	-0.000951915	-0.000256998	-0.000100239	-0.0001767	0.000165857	-0.000228025	7.42594e-05	-0.000101206	0.00030687	-2.72207e-05	0.00041259	3.45979e-07	-1.09442e-05	7.96079e-05	-0.000201529
2	-2.88326e-05	0.000255873	2.50906e-05	0.000112232	-6.91444e-05	-0.000505346	3.80227e-05	4.5954e-05	7.89428e-05	-2.95494e-05	-0.000259068	0.000187219	-6.3103e-05	-5.0178e-07	-0.000181782	-8.67907e-06	-9.04153e-05	-0.000474692	9.59225e-06	3.76436e-05	-2.6206e-05	-0.000137649	3.81468e-05	0.000140054	0.000321993
3	-0.000593347	2.50906e-05	0.0180343	0.00598488	-0.0085822	0.0067668	0.000911008	-0.00186909	-0.00222097	-6.65995e-05	0.002028	-0.00073851	-0.00465849	-9.85816e-05	0.00400553	-0.00168364	-0.000348752	0.00618917	-0.00101024	0.00139606	0.0022387	-0.00138833	0.000174247	-0.00320976	-0.000139068
4	-1.82756e-05	0.000112232	0.00598488	0.00613589	-0.00506778	0.00559843	-4.22508e-05	-0.00187489	-0.000852376	-6.57086e-05	0.00152236	-0.000108903	-0.000971055	0.000183264	0.0020867	-0.00035291	0.000225044	0.0021811	0.00076113	-0.000120693	0.00166075	-0.000591741	0.000149163	-0.00139246	-0.000561986
5	0.000209839	-6.91444e-05	-0.0085822	-0.00506778	0.00645422	-0.0187422	-0.000382632	-3.02461e-05	0.000666749	2.00264e-05	-0.00364401	-0.000153335	0.00190157	-0.000182179	-0.00265755	0.00043205	-0.000180796	-0.00340203	-0.000959491	0.000151789	-0.00112703	0.00101269	-5.85707e-05	0.0011358	0.000209409
6	0.000446224	-0.000505346	0.0067668	0.00559843	-0.0187422	0.319267	-0.000467445	0.00310707	-0.00152669	0.000470064	0.0436794	-0.000318544	-0.00624702	0.00307226	0.0165727	-0.000730534	0.00589208	0.0155925	0.0207719	-0.000779652	0.0135421	-0.0150813	-0.00395451	-0.00155984	-0.0135531
7	-0.00043692	3.80227e-05	0.000911008	-4.22508e-05	-0.000382632	-0.000467445	0.000724449	0.000373721	9.5809e-05	-3.92632e-05	0.00162998	0.000286726	0.000181142	0.000259961	-0.000205159	0.000434676	-0.000179506	0.000259955	-0.00050294	0.00010181	-0.000689402	-4.58696e-05	-1.88899e-05	4.05585e-05	0.000332436
8	-0.000100826	4.5954e-05	-0.00186909	-0.00187489	-3.02461e-05	0.00310707	0.000373721	0.0230311	-0.00553749	0.0026512	0.00400378	0.00368043	-0.00470898	0.000598797	-0.00653246	-0.0021037	-0.00056275	-0.0010941	-0.000188688	-0.00310445	0.000961994	-0.00315866	-0.00105676	-0.00442099	0.00766761
9	-0.000182358	7.89428e-05	-0.00222097	-0.000852376	0.000666749	-0.00152669	9.5809e-05	-0.00553749	0.0261717	-0.00264285	-0.000208782	0.00212366	0.000309195	0.000139181	-0.00397597	-0.000935785	0.000425942	-0.00832604	-0.0063671	0.00916404	-0.00210286	-0.000777891	-0.00107484	0.00337349	-0.0027995
10	1.72864e-05	-2.95494e-05	-6.65995e-05	-6.57086e-05	2.00264e-05	0.000470064	-3.92632e-05	0.0026512	-0.00264285	0.000775605	-7.76171e-05	0.000203667	-0.000352249	1.22392e-05	-0.000414332	-0.000322875	-5.56616e-05	-0.0002225	0.00024633	-0.00106903	0.000257264	-0.000198174	8.55086e-06	-0.000334713	0.00101495
11	-0.000951915	-0.000259068	0.002028	0.00152236	-0.00364401	0.0436794	0.00162998	0.00400378	-0.000208782	-7.76171e-05	0.781775	0.00268089	-0.00275816	0.012761	-0.00302914	0.00659364	0.0131095	0.00332713	-0.00183341	0.0130975	-0.00656734	-0.0204087	-0.0240412	0.00357521	-0.0123699
12	-0.000256998	0.000187219	-0.00073851	-0.000108903	-0.000153335	-0.000318544	0.000286726	0.00368043	0.00212366	0.000203667	0.00268089	0.0303263	-0.0317207	0.000550062	-0.0061958	0.0010866	-0.00191645	-0.00647207	0.0069352	-0.0134521	0.0197902	-0.0147423	-0.00369377	-0.000685912	0.0119883
13	-0.000100239	-6.3103e-05	-0.00465849	-0.000971055	0.00190157	-0.00624702	0.000181142	-0.00470898	0.000309195	-0.000352249	-0.00275816	-0.0317207	0.0603315	-0.00190443	-0.00704416	-0.00139552	-0.000670704	-0.00768178	-0.0111953	0.0184165	-0.0425426	0.0311557	0.00798567	0.00876604	-0.0150528
14	-0.0001767	-5.0178e-07	-9.85816e-05	0.000183264	-0.000182179	0.00307226	0.000259961	0.000598797	0.000139181	1.22392e-05	0.012761	0.000550062	-0.00190443	0.008953	0.00235237	0.0052894	0.000670262	0.00342471	-0.00113069	-0.00502154	0.00087573	-0.003031	-0.00657504	-0.00417666	0.00632731
15	0.000165857	-0.000181782	0.00400553	0.0020867	-0.00265755	0.0165727	-0.000205159	-0.00653246	-0.00397597	-0.000414332	-0.00302914	-0.0061958	-0.00704416	0.00235237	0.055324	0.00967578	0.00189495	0.0444708	0.00890101	-0.0204982	0.0089072	-0.00103329	9.90905e-05	-0.0221547	0.00928933
16	-0.000228025	-8.67907e-06	-0.00168364	-0.00035291	0.00043205	-0.000730534	0.000434676	-0.0021037	-0.000935785	-0.000322875	0.00659364	0.0010866	-0.00139552	0.0052894	0.00967578	0.0567109	-0.0199528	0.0123886	-0.0130885	-0.0114532	-0.00163426	-0.00088109	-0.00627124	-0.00723482	0.0232668
17	7.42594e-05	-9.04153e-05	-0.000348752	0.000225044	-0.000180796	0.00589208	-0.000179506	-0.00056275	0.000425942	-5.56616e-05	0.0131095	-0.00191645	-0.000670704	0.000670262	0.00189495	-0.0199528	0.0357803	0.00252807	0.0126352	-0.00610319	0.00365738	-0.00536042	-0.00146297	-0.00141089	-0.0236422
18	-0.000101206	-0.000474692	0.00618917	0.0021811	-0.00340203	0.0155925	0.000259955	-0.0010941	-0.00832604	-0.0002225	0.00332713	-0.00647207	-0.00768178	0.00342471	0.0444708	0.0123886	0.00252807	0.0686026	0.0120031	-0.0252619	0.00977149	-0.00106237	-0.00108584	-0.0257565	0.00865041
19	0.00030687	9.59225e-06	-0.00101024	0.00076113	-0.000959491	0.0207719	-0.00050294	-0.000188688	-0.0063671	0.00024633	-0.00183341	0.0069352	-0.0111953	-0.00113069	0.00890101	-0.0130885	0.0126352	0.0120031	0.0802164	-0.0529355	0.0128811	-0.0086008	0.000602589	-0.00507475	-0.0146297
20	-2.72207e-05	3.76436e-05	0.00139606	-0.000120693	0.000151789	-0.000779652	0.00010181	-0.00310445	0.00916404	-0.00106903	0.0130975	-0.0134521	0.0184165	-0.00502154	-0.0204982	-0.0114532	-0.00610319	-0.0252619	-0.0529355	0.121363	-0.0177071	0.00988309	0.00342488	0.0139445	-0.0328943
21	0.00041259	-2.6206e-05	0.0022387	0.00166075	-0.00112703	0.0135421	-0.000689402	0.000961994	-0.00210286	0.000257264	-0.00656734	0.0197902	-0.0425426	0.00087573	0.0089072	-0.00163426	0.00365738	0.00977149	0.0128811	-0.0177071	0.0431737	-0.0298668	-0.00408349	-0.0129705	0.00689098
22	3.45979e-07	-0.000137649	-0.00138833	-0.000591741	0.00101269	-0.0150813	-4.58696e-05	-0.00315866	-0.000777891	-0.000198174	-0.0204087	-0.0147423	0.0311557	-0.003031	-0.00103329	-0.00088109	-0.00536042	-0.00106237	-0.0086008	0.00988309	-0.0298668	0.0357783	0.00508117	0.00193161	-0.00281745
23	-1.09442e-05	3.81468e-05	0.000174247	0.000149163	-5.85707e-05	-0.00395451	-1.88899e-05	-0.00105676	-0.00107484	8.55086e-06	-0.0240412	-0.00369377	0.00798567	-0.00657504	9.90905e-05	-0.00627124	-0.00146297	-0.00108584	0.000602589	0.00342488	-0.00408349	0.00508117	0.0131999	0.00163598	-0.00602667
24	7.96079e-05	0.000140054	-0.00320976	-0.00139246	0.0011358	-0.00155984	4.05585e-05	-0.00442099	0.00337349	-0.000334713	0.00357521	-0.000685912	0.00876604	-0.00417666	-0.0221547	-0.00723482	-0.00141089	-0.0257565	-0.00507475	0.0139445	-0.0129705	0.00193161	0.00163598	0.0356707	-0.00979998
25	-0.000201529	0.000321993	-0.000139068	-0.000561986	0.000209409	-0.0135531	0.000332436	0.00766761	-0.0027995	0.00101495	-0.0123699	0.0119883	-0.0150528	0.00632731	0.00928933	0.0232668	-0.0236422	0.00865041	-0.0146297	-0.0328943	0.00689098	-0.00281745	-0.00602667	-0.00979998	0.1001
26	-0.000332996	-0.000394282	-0.000297718	-0.000692975	0.000304661	0.00459072	0.000316389	-0.00779446	0.00402694	-0.00146171	0.0151884	-0.0102289	0.0142085	0.00112301	0.00900899	0.00860003	0.00829418	0.0111772	-0.00904339	0.0179619	-0.0121999	0.01035	0.00038284	-0.00292956	-0.0553881
27	0.000243789	0.000270778	-0.00419881	-0.00109444	0.0016742	-0.00665152	-0.000578318	-0.00309705	0.00264942	-0.000468341	0.00148212	0.00053702	0.00670025	-0.00302432	-0.0144703	-0.00546102	-0.000264613	-0.018789	-0.00610847	0.0150125	-0.0125873	0.00509733	0.00169468	0.0168676	-0.00648846
28	-0.000249067	-1.38866e-05	-0.00144254	-9.32977e-05	0.000400318	-0.0201373	0.000424329	0.000322212	0.00011417	-0.000226557	-0.0059017	0.0025453	0.000332323	0.00814843	0.0135538	0.0547054	-0.0218394	0.0193291	-0.0211882	-0.030914	-0.00471108	0.00421523	-0.0065649	-0.0139287	0.0385438
29	0.00049996	0.000159408	0.000667769	0.00184076	-0.00139906	0.0162205	-0.000516809	0.00828164	-0.00325277	0.00150998	-0.00362435	0.00506944	-0.016255	-0.000812514	0.00379745	-0.0371422	0.0214749	0.0057664	0.0663997	-0.052298	0.0233348	-0.0192604	-0.000273076	-0.00379812	-0.000305341
30	-0.000315306	0.00110206	0.000591042	0.00287835	-0.00264552	0.0166114	0.000758006	0.00135113	0.0033692	0.000811207	-0.0262174	0.0621099	-0.0400046	-0.00265411	-0.00869765	-0.0374871	0.00289486	-0.0218536	0.0540811	-0.0495504	0.0332469	-0.0150727	-0.00655798	0.0183855	0.0187312
31	0.000192068	-0.000407466	-0.0047305	-0.00013522	0.00121116	0.00151046	-0.000278039	-0.00954744	-0.00277436	-0.000672419	-0.0405376	-0.0619267	0.100167	-0.0085574	0.00533174	-0.00866435	-0.00153292	0.00695728	-0.00873008	0.0218797	-0.0669462	0.0674215	0.0178019	0.00684661	-0.0229386
32	-6.5446e-05	6.8715e-05	0.0011636	1.44849e-05	-0.000221708	-0.00423004	8.16249e-05	0.00126962	-2.63287e-05	7.4768e-05	-0.00153656	0.00812263	-0.0148352	-0.00111576	0.000230799	-0.000207353	-0.000287796	8.43937e-05	0.000936374	-0.00169347	0.00955834	-0.00780667	0.000704677	-0.00169227	0.00193396
33	0.000177396	0.00135833	-0.0183696	-0.00839888	0.0136858	-0.103608	-0.000294301	0.00706982	0.0107711	0.00207605	0.0136051	-0.0115868	0.0686182	-0.0046232	-0.212275	-0.0286063	-0.0122657	-0.226546	-0.0554019	0.11152	-0.0651816	0.0154052	0.00318245	0.0985885	-0.0666851
34	-8.04396e-05	-1.69267e-05	0.000218043	-4.77636e-06	-3.4722e-05	-0.00272382	9.64884e-05	-0.000342738	-0.00037074	-3.96939e-05	-0.000759411	-0.000132444	-8.60974e-05	0.00126464	0.00440194	0.00762785	-0.00357266	0.00461153	-0.00617994	-0.00315455	-0.00128352	0.00241226	-0.00094601	-0.00336498	0.0100977
35	-0.00102888	-0.00111141	-0.000814246	-0.00328702	0.00213158	-0.00300077	0.000917982	-0.021821	0.0159697	-0.00473509	0.0353119	-0.0327094	0.0518338	-0.00345498	0.00831343	0.022197	0.0161959	0.0150283	-0.0745159	0.127976	-0.0483826	0.0371362	0.00512644	0.00623601	-0.146666
