# Supplementary material for: Time-varying asymmetry and tail thickness in long series of daily financial returns
Source: publisher site journal article supplement (doi:10.1515/snde-2017-0071), 2018-10-02
Supplement: Supplementary file 337 [file cvm_ip.xlsx]

## Sheet: 1
	delta	rho	alpha0	alpha1-	beta1	alpha1+	lambda1	ni1	ni2	a00	h0	gamma_s0	gamma_s1	gamma_s2	gamma_s3	gamma_s4	gamma_s5	gamma_s6	gamma_s7	gamma_s8	gamma_c0	gamma_c1	gamma_c2	gamma_c3	gamma_c4
1	0.000303508	-1.40574e-05	-6.94674e-06	-1.79074e-06	1.43496e-05	3.43469e-06	-0.00043692	-0.000397133	-0.00120171	5.49674e-06	-0.000209561	-0.000256998	-0.000100239	-0.0001767	0.000165857	-0.000228025	7.42594e-05	-0.000101206	0.00030687	-2.72207e-05	0.00041259	3.45979e-07	-1.09442e-05	7.96079e-05	-0.000201529
2	-1.40574e-05	6.08224e-05	1.43638e-07	5.20527e-06	-2.26151e-06	-1.48916e-06	1.85388e-05	9.10896e-05	0.000261856	-4.58197e-06	6.20301e-07	9.13617e-05	-3.08446e-05	-2.33577e-07	-8.85679e-05	-4.16628e-06	-4.40826e-05	-0.000231359	4.75411e-06	1.82395e-05	-1.27482e-05	-6.71236e-05	1.85938e-05	6.82769e-05	0.000156926
3	-6.94674e-06	1.43638e-07	2.49529e-06	6.81204e-06	-6.93507e-06	5.24665e-07	1.06811e-05	-8.23504e-05	-0.000169608	-2.64102e-07	1.24639e-05	-9.3797e-06	-5.39084e-05	-1.2596e-06	4.78288e-05	-1.9441e-05	-3.9364e-06	7.3169e-05	-1.13471e-05	1.46206e-05	2.62021e-05	-1.58267e-05	2.11115e-06	-3.81946e-05	-1.67008e-06
4	-1.79074e-06	5.20527e-06	6.81204e-06	5.74281e-05	-3.3655e-05	4.17236e-06	-3.98085e-06	-0.000686879	-0.000538101	-2.01978e-06	6.93417e-05	-1.13309e-05	-9.19431e-05	1.78809e-05	0.00020145	-3.22097e-05	2.07012e-05	0.000210493	7.37984e-05	-1.31042e-05	0.000159716	-5.73805e-05	1.47675e-05	-0.000133716	-5.41556e-05
5	1.43496e-05	-2.26151e-06	-6.93507e-06	-3.3655e-05	3.04248e-05	-9.4602e-06	-2.62429e-05	-1.28602e-05	0.000299618	4.52837e-07	-7.3233e-05	-1.09316e-05	0.000130389	-1.24928e-05	-0.000181388	2.89693e-05	-1.18842e-05	-0.000231783	-6.55007e-05	1.33023e-05	-7.69409e-05	6.85438e-05	-4.11564e-06	7.78558e-05	1.31868e-05
6	3.43469e-06	-1.48916e-06	5.24665e-07	4.17236e-06	-9.4602e-06	1.48852e-05	-3.64318e-06	0.000102973	-0.000139543	9.25028e-07	4.44809e-05	-5.8597e-06	-2.30453e-05	1.06762e-05	8.78772e-05	-1.95366e-05	5.3153e-05	8.82216e-05	0.000147023	-7.48469e-06	8.01646e-05	-8.40294e-05	-2.4699e-06	-1.4673e-05	-0.000123535
7	-0.00043692	1.85388e-05	1.06811e-05	-3.98085e-06	-2.62429e-05	-3.64318e-06	0.000724449	0.00142017	0.000733054	-1.24858e-05	0.000319149	0.000286726	0.000181142	0.000259961	-0.000205159	0.000434676	-0.000179506	0.000259955	-0.00050294	0.00010181	-0.000689402	-4.58696e-05	-1.88899e-05	4.05585e-05	0.000332436
8	-0.000397133	9.10896e-05	-8.23504e-05	-0.000686879	-1.28602e-05	0.000102973	0.00142017	0.344478	-0.137972	0.00324138	0.00117281	0.0142386	-0.0179685	0.00217029	-0.0250943	-0.00841918	-0.00172494	-0.0040847	-0.000259934	-0.0119279	0.00373174	-0.0121231	-0.00387555	-0.0174312	0.0285715
9	-0.00120171	0.000261856	-0.000169608	-0.000538101	0.000299618	-0.000139543	0.000733054	-0.137972	1.14091	-0.00549117	-0.00178645	0.0136636	0.00247949	0.00111582	-0.0251508	-0.00620283	0.00251898	-0.0547773	-0.0434347	0.0607404	-0.0142044	-0.00488008	-0.0068503	0.022143	-0.0174692
10	5.49674e-06	-4.58197e-06	-2.64102e-07	-2.01978e-06	4.52837e-07	9.25028e-07	-1.24858e-05	0.00324138	-0.00549117	7.84624e-05	-1.0606e-05	6.47661e-05	-0.000112021	3.87591e-06	-0.000131776	-0.000102658	-1.77378e-05	-7.07301e-05	7.83711e-05	-0.000340064	8.18189e-05	-6.30375e-05	2.73686e-06	-0.000106457	0.00032284
11	-0.000209561	6.20301e-07	1.24639e-05	6.93417e-05	-7.3233e-05	4.44809e-05	0.000319149	0.00117281	-0.00178645	-1.0606e-05	0.0439019	-0.000348719	0.000710964	0.00239018	-0.00148091	0.000939082	0.00317836	-0.000699433	-0.000971388	0.00401316	-0.00203865	-0.00377095	-0.00498525	0.00124255	-0.00368087
12	-0.000256998	9.13617e-05	-9.3797e-06	-1.13309e-05	-1.09316e-05	-5.8597e-06	0.000286726	0.0142386	0.0136636	6.47661e-05	-0.000348719	0.0303263	-0.0317207	0.000550062	-0.0061958	0.0010866	-0.00191645	-0.00647207	0.0069352	-0.0134521	0.0197902	-0.0147423	-0.00369377	-0.000685912	0.0119883
13	-0.000100239	-3.08446e-05	-5.39084e-05	-9.19431e-05	0.000130389	-2.30453e-05	0.000181142	-0.0179685	0.00247949	-0.000112021	0.000710964	-0.0317207	0.0603315	-0.00190443	-0.00704416	-0.00139552	-0.000670704	-0.00768178	-0.0111953	0.0184165	-0.0425426	0.0311557	0.00798567	0.00876604	-0.0150528
14	-0.0001767	-2.33577e-07	-1.2596e-06	1.78809e-05	-1.24928e-05	1.06762e-05	0.000259961	0.00217029	0.00111582	3.87591e-06	0.00239018	0.000550062	-0.00190443	0.008953	0.00235237	0.0052894	0.000670262	0.00342471	-0.00113069	-0.00502154	0.00087573	-0.003031	-0.00657504	-0.00417666	0.00632731
15	0.000165857	-8.85679e-05	4.78288e-05	0.00020145	-0.000181388	8.78772e-05	-0.000205159	-0.0250943	-0.0251508	-0.000131776	-0.00148091	-0.0061958	-0.00704416	0.00235237	0.055324	0.00967578	0.00189495	0.0444708	0.00890101	-0.0204982	0.0089072	-0.00103329	9.90905e-05	-0.0221547	0.00928933
16	-0.000228025	-4.16628e-06	-1.9441e-05	-3.22097e-05	2.89693e-05	-1.95366e-05	0.000434676	-0.00841918	-0.00620283	-0.000102658	0.000939082	0.0010866	-0.00139552	0.0052894	0.00967578	0.0567109	-0.0199528	0.0123886	-0.0130885	-0.0114532	-0.00163426	-0.00088109	-0.00627124	-0.00723482	0.0232668
17	7.42594e-05	-4.40826e-05	-3.9364e-06	2.07012e-05	-1.18842e-05	5.3153e-05	-0.000179506	-0.00172494	0.00251898	-1.77378e-05	0.00317836	-0.00191645	-0.000670704	0.000670262	0.00189495	-0.0199528	0.0357803	0.00252807	0.0126352	-0.00610319	0.00365738	-0.00536042	-0.00146297	-0.00141089	-0.0236422
18	-0.000101206	-0.000231359	7.3169e-05	0.000210493	-0.000231783	8.82216e-05	0.000259955	-0.0040847	-0.0547773	-7.07301e-05	-0.000699433	-0.00647207	-0.00768178	0.00342471	0.0444708	0.0123886	0.00252807	0.0686026	0.0120031	-0.0252619	0.00977149	-0.00106237	-0.00108584	-0.0257565	0.00865041
19	0.00030687	4.75411e-06	-1.13471e-05	7.37984e-05	-6.55007e-05	0.000147023	-0.00050294	-0.000259934	-0.0434347	7.83711e-05	-0.000971388	0.0069352	-0.0111953	-0.00113069	0.00890101	-0.0130885	0.0126352	0.0120031	0.0802164	-0.0529355	0.0128811	-0.0086008	0.000602589	-0.00507475	-0.0146297
20	-2.72207e-05	1.82395e-05	1.46206e-05	-1.31042e-05	1.33023e-05	-7.48469e-06	0.00010181	-0.0119279	0.0607404	-0.000340064	0.00401316	-0.0134521	0.0184165	-0.00502154	-0.0204982	-0.0114532	-0.00610319	-0.0252619	-0.0529355	0.121363	-0.0177071	0.00988309	0.00342488	0.0139445	-0.0328943
21	0.00041259	-1.27482e-05	2.62021e-05	0.000159716	-7.69409e-05	8.01646e-05	-0.000689402	0.00373174	-0.0142044	8.18189e-05	-0.00203865	0.0197902	-0.0425426	0.00087573	0.0089072	-0.00163426	0.00365738	0.00977149	0.0128811	-0.0177071	0.0431737	-0.0298668	-0.00408349	-0.0129705	0.00689098
22	3.45979e-07	-6.71236e-05	-1.58267e-05	-5.73805e-05	6.85438e-05	-8.40294e-05	-4.58696e-05	-0.0121231	-0.00488008	-6.30375e-05	-0.00377095	-0.0147423	0.0311557	-0.003031	-0.00103329	-0.00088109	-0.00536042	-0.00106237	-0.0086008	0.00988309	-0.0298668	0.0357783	0.00508117	0.00193161	-0.00281745
23	-1.09442e-05	1.85938e-05	2.11115e-06	1.47675e-05	-4.11564e-06	-2.4699e-06	-1.88899e-05	-0.00387555	-0.0068503	2.73686e-06	-0.00498525	-0.00369377	0.00798567	-0.00657504	9.90905e-05	-0.00627124	-0.00146297	-0.00108584	0.000602589	0.00342488	-0.00408349	0.00508117	0.0131999	0.00163598	-0.00602667
24	7.96079e-05	6.82769e-05	-3.81946e-05	-0.000133716	7.78558e-05	-1.4673e-05	4.05585e-05	-0.0174312	0.022143	-0.000106457	0.00124255	-0.000685912	0.00876604	-0.00417666	-0.0221547	-0.00723482	-0.00141089	-0.0257565	-0.00507475	0.0139445	-0.0129705	0.00193161	0.00163598	0.0356707	-0.00979998
25	-0.000201529	0.000156926	-1.67008e-06	-5.41556e-05	1.31868e-05	-0.000123535	0.000332436	0.0285715	-0.0174692	0.00032284	-0.00368087	0.0119883	-0.0150528	0.00632731	0.00928933	0.0232668	-0.0236422	0.00865041	-0.0146297	-0.0328943	0.00689098	-0.00281745	-0.00602667	-0.00979998	0.1001
26	-0.000332996	-0.000192204	-4.355e-06	-6.68301e-05	2.08089e-05	6.08452e-05	0.000316389	-0.0293753	0.0259935	-0.000464886	0.00414783	-0.0102289	0.0142085	0.00112301	0.00900899	0.00860003	0.00829418	0.0111772	-0.00904339	0.0179619	-0.0121999	0.01035	0.00038284	-0.00292956	-0.0553881
27	0.000243789	0.000131962	-4.97501e-05	-0.000105335	0.000113842	-3.39715e-05	-0.000578318	-0.012046	0.0165995	-0.000148963	0.000929406	0.00053702	0.00670025	-0.00302432	-0.0144703	-0.00546102	-0.000264613	-0.018789	-0.00610847	0.0150125	-0.0125873	0.00509733	0.00169468	0.0168676	-0.00648846
28	-0.000249067	-6.76822e-06	-1.70113e-05	-6.56337e-06	2.57776e-05	-0.000144726	0.000424329	0.00107628	0.00116409	-7.20221e-05	-0.00248358	0.0025453	0.000332323	0.00814843	0.0135538	0.0547054	-0.0218394	0.0193291	-0.0211882	-0.030914	-0.00471108	0.00421523	-0.0065649	-0.0139287	0.0385438
29	0.00049996	7.77756e-05	9.32878e-06	0.000174911	-9.41322e-05	0.00011639	-0.000516809	0.0309287	-0.0205673	0.000480244	-0.00425468	0.00506944	-0.016255	-0.000812514	0.00379745	-0.0371422	0.0214749	0.0057664	0.0663997	-0.052298	0.0233348	-0.0192604	-0.000273076	-0.00379812	-0.000305341
30	-1.46347e-09	3.29839e-09	-2.06994e-10	1.01802e-09	-1.65681e-09	2.31582e-09	4.23456e-09	2.00518e-07	3.92012e-07	5.4981e-09	-9.90207e-08	1.15893e-06	-8.98687e-07	6.1249e-08	1.53362e-07	-1.24402e-07	-2.96288e-08	5.19515e-09	7.39265e-07	-1.26266e-06	7.74253e-07	-4.19942e-07	-1.68619e-07	-7.44415e-09	7.05202e-07
31	5.39332e-08	-2.98633e-08	-1.38627e-08	-2.1691e-09	1.63317e-08	2.13561e-08	-7.00121e-08	-5.491e-06	-2.21872e-06	-2.0539e-08	-8.84658e-07	-9.22574e-06	1.73056e-05	-1.46357e-06	-1.27951e-07	-2.05246e-06	2.66408e-08	-2.68496e-08	-3.41835e-07	2.66e-06	-1.08636e-05	9.79397e-06	3.27083e-06	2.21491e-06	-3.99297e-06
32	-8.46752e-09	4.89143e-09	-9.3772e-10	-1.37812e-09	1.53167e-09	-1.35361e-09	6.66442e-09	-2.34003e-07	-2.10669e-06	4.44682e-09	-1.45435e-06	-8.87476e-07	2.21008e-06	-2.547e-06	-6.97201e-08	-2.27839e-06	-1.89629e-07	-1.36978e-07	7.09615e-07	8.91874e-07	-1.07744e-06	1.53047e-06	3.93217e-06	6.18318e-07	-2.09165e-06
33	9.47007e-09	1.91292e-08	-5.12264e-09	-2.48099e-08	2.45841e-08	-1.63251e-08	-1.53542e-08	7.90495e-07	3.11897e-06	1.52905e-08	1.17789e-07	5.00402e-07	9.07846e-07	-3.18331e-07	-5.98512e-06	-9.84992e-07	-4.74737e-07	-6.4401e-06	-1.23335e-06	2.31399e-06	-1.39797e-06	1.15014e-07	-7.30723e-08	3.47228e-06	-7.92928e-07
34	-9.2324e-08	2.43755e-08	4.17241e-10	-9.01582e-09	1.20433e-08	-5.87729e-08	1.2606e-07	1.94205e-06	-4.90462e-06	4.99082e-08	-1.11136e-06	1.19883e-06	-9.96017e-07	2.11249e-06	2.10248e-06	1.28273e-05	-8.37242e-06	1.77963e-06	-1.03304e-05	-7.01365e-06	-1.94127e-06	3.10775e-06	-1.90257e-06	-3.33378e-06	2.27528e-05
35	-7.57547e-07	-2.29676e-07	-4.37654e-09	-1.40339e-07	4.97369e-08	-5.84322e-08	7.16567e-07	-3.81061e-05	3.14807e-05	-6.4644e-07	6.69093e-06	-7.27984e-06	1.26396e-05	5.27524e-06	1.93286e-05	3.75434e-05	1.39676e-07	2.44567e-05	-3.98033e-05	1.72376e-05	-1.74953e-05	1.75716e-05	-4.37916e-06	-1.03587e-05	-8.12482e-06
