# Supplementary material for: Time-varying asymmetry and tail thickness in long series of daily financial returns
Source: publisher site journal article supplement (doi:10.1515/snde-2017-0071), 2018-10-02
Supplement: Supplementary file 359 [file mq.xlsx]

## Sheet: 1
	quantile	delta	rho	alpha0	alpha1-	beta1	alpha1+	lambda1	ni1	ni2	a00	h0	gamma_s0	gamma_s1	gamma_s2	gamma_s3	gamma_s4	gamma_s5	gamma_s6	gamma_s7	gamma_s8	gamma_c0	gamma_c1	gamma_c2	gamma_c3
1	0.005	-0.04215	0.136675	0.008106	0.090217	0.910775	0.000755	-0.03372	4.5912	6.284	0.47716	0.0049	-0.463	-1.0229	-0.4891	-0.9981	-0.8144	-0.5576	-0.7813	-0.9	-0.9074	0.358	-0.5853	-0.4005	-1.4093
2	0.01	-0.03767	0.13889	0.00842	0.09169	0.912372	0.000988	-0.02599	4.6645	6.4475	0.47915	0.0103	-0.4213	-0.9697	-0.472	-0.9399	-0.7716	-0.495	-0.704	-0.8542	-0.7991	0.3867	-0.5453	-0.38145	-1.3747
3	0.015	-0.03451	0.14033	0.00863	0.092831	0.913388	0.001146	-0.02131	4.7232	6.573	0.48053	0.0171	-0.3918	-0.9133	-0.46095	-0.8809	-0.7375	-0.4518	-0.6601	-0.8242	-0.7068	0.4089	-0.4997	-0.3703	-1.3541
4	0.02	-0.03238	0.141375	0.008792	0.093633	0.914062	0.001291	-0.01779	4.7699	6.658	0.481535	0.0218	-0.371	-0.8834	-0.4534	-0.8462	-0.7161	-0.4227	-0.627	-0.8027	-0.6179	0.425	-0.4624	-0.3613	-1.3404
5	0.025	-0.03091	0.1422	0.008928	0.094356	0.914597	0.001438	-0.01519	4.8144	6.72	0.482315	0.0258	-0.3556	-0.8572	-0.44695	-0.8169	-0.6975	-0.3986	-0.5969	-0.7865	-0.5372	0.4402	-0.4111	-0.35465	-1.3298
6	0.03	-0.02963	0.14295	0.009044	0.094912	0.915039	0.001675	-0.01298	4.8529	6.7735	0.483	0.0293	-0.3445	-0.8391	-0.44205	-0.792	-0.6813	-0.3769	-0.5726	-0.7734	-0.4759	0.452	-0.373	-0.34915	-1.3189
7	0.035	-0.02851	0.14354	0.009137	0.095393	0.915449	0.002054	-0.01098	4.8838	6.8215	0.483605	0.0325	-0.3351	-0.821	-0.4373	-0.7721	-0.6684	-0.3591	-0.552	-0.7609	-0.4318	0.4608	-0.3373	-0.34445	-1.3097
8	0.04	-0.02745	0.144045	0.009221	0.095813	0.915803	0.002414	-0.00913	4.9146	6.8675	0.48416	0.0354	-0.3277	-0.8012	-0.43325	-0.7543	-0.6575	-0.3437	-0.5352	-0.7486	-0.4003	0.4686	-0.311	-0.3397	-1.3011
9	0.045	-0.02652	0.14451	0.009301	0.096177	0.916112	0.002698	-0.0075	4.9407	6.909	0.48464	0.0379	-0.3194	-0.783	-0.42935	-0.7382	-0.6472	-0.3298	-0.5201	-0.7371	-0.3683	0.4754	-0.2787	-0.3356	-1.2926
10	0.05	-0.02571	0.14492	0.009377	0.09653	0.916386	0.002938	-0.00605	4.9624	6.947	0.485095	0.0407	-0.3115	-0.7694	-0.4256	-0.7234	-0.6379	-0.3189	-0.5061	-0.7253	-0.339	0.4825	-0.2514	-0.3319	-1.2851
11	0.055	-0.02493	0.14529	0.009447	0.096854	0.916678	0.00312	-0.00459	4.9834	6.9805	0.485505	0.0436	-0.3044	-0.7577	-0.42255	-0.7102	-0.6287	-0.3085	-0.4927	-0.7152	-0.3148	0.4891	-0.2351	-0.3282	-1.2784
12	0.06	-0.02421	0.145635	0.009506	0.097129	0.916936	0.003287	-0.00327	5.0031	7.0125	0.4859	0.0461	-0.2984	-0.7464	-0.41955	-0.6981	-0.6207	-0.2995	-0.4807	-0.7057	-0.2938	0.4954	-0.2225	-0.32495	-1.2714
13	0.065	-0.02352	0.145965	0.009564	0.097422	0.917177	0.003445	-0.00211	5.0204	7.0415	0.486265	0.0486	-0.2932	-0.7377	-0.4165	-0.6859	-0.6136	-0.2907	-0.4692	-0.6965	-0.2732	0.5016	-0.2127	-0.32185	-1.2651
14	0.07	-0.02283	0.146275	0.009616	0.097672	0.917404	0.003585	-0.00096	5.0369	7.0695	0.486625	0.0507	-0.2883	-0.7283	-0.41365	-0.6751	-0.6072	-0.2834	-0.4581	-0.6876	-0.2545	0.5076	-0.2033	-0.3187	-1.2594
15	0.075	-0.02221	0.146555	0.009666	0.097909	0.917616	0.003721	0	5.0525	7.0965	0.486965	0.053	-0.2837	-0.7179	-0.41085	-0.6649	-0.6014	-0.2757	-0.4467	-0.6793	-0.2361	0.5125	-0.1952	-0.31605	-1.2539
16	0.08	-0.02161	0.14684	0.009714	0.09814	0.91784	0.003837	0.00098	5.0679	7.1235	0.48729	0.0555	-0.2788	-0.7079	-0.40845	-0.6546	-0.5956	-0.2689	-0.435	-0.6714	-0.2151	0.5173	-0.1875	-0.31365	-1.2481
17	0.085	-0.02107	0.1471	0.009757	0.098384	0.918033	0.003956	0.00187	5.0815	7.1495	0.487615	0.0579	-0.2743	-0.6996	-0.40615	-0.6437	-0.5898	-0.2616	-0.4245	-0.6638	-0.1977	0.5221	-0.179	-0.31105	-1.2429
18	0.09	-0.02047	0.14736	0.009802	0.098611	0.918214	0.004062	0.00276	5.0951	7.1745	0.48792	0.0601	-0.27	-0.6923	-0.40385	-0.6343	-0.5843	-0.2544	-0.4156	-0.6562	-0.1818	0.5265	-0.1708	-0.30865	-1.2381
19	0.095	-0.01997	0.147615	0.009843	0.098821	0.918404	0.004173	0.00354	5.1093	7.197	0.48822	0.0621	-0.2659	-0.6853	-0.4015	-0.6251	-0.5789	-0.2476	-0.4065	-0.6494	-0.167	0.5312	-0.1637	-0.30615	-1.2335
20	0.1	-0.01953	0.147835	0.00988	0.099011	0.91859	0.004283	0.00433	5.122	7.22	0.488485	0.064	-0.2615	-0.6785	-0.3994	-0.617	-0.5739	-0.2407	-0.3973	-0.6426	-0.1526	0.5354	-0.1573	-0.3037	-1.229
21	0.105	-0.01907	0.14806	0.009918	0.099188	0.918764	0.004376	0.00504	5.1357	7.2425	0.48874	0.0661	-0.2577	-0.6715	-0.3974	-0.6087	-0.5689	-0.2341	-0.3888	-0.6363	-0.1396	0.5393	-0.1503	-0.30125	-1.2245
22	0.11	-0.01865	0.14827	0.009956	0.099364	0.918935	0.004471	0.0058	5.1478	7.263	0.48896	0.0682	-0.2544	-0.6651	-0.3954	-0.6001	-0.5637	-0.2281	-0.3804	-0.6302	-0.1265	0.5434	-0.1431	-0.2988	-1.2205
23	0.115	-0.0182	0.14847	0.00999	0.099544	0.919092	0.004579	0.00648	5.1591	7.285	0.489195	0.0701	-0.2512	-0.658	-0.3934	-0.5923	-0.559	-0.2225	-0.3717	-0.6241	-0.1124	0.547	-0.1364	-0.29665	-1.2165
24	0.12	-0.01774	0.14867	0.010025	0.09971	0.919244	0.004682	0.00717	5.1705	7.305	0.489435	0.0719	-0.2484	-0.6513	-0.3915	-0.5853	-0.5544	-0.2164	-0.3639	-0.6181	-0.0983	0.5506	-0.1297	-0.29425	-1.2127
25	0.125	-0.01728	0.14886	0.010059	0.099875	0.919394	0.004775	0.00784	5.1821	7.326	0.489645	0.0737	-0.2454	-0.6452	-0.3897	-0.5776	-0.5501	-0.2114	-0.3564	-0.6123	-0.0859	0.5546	-0.1226	-0.29195	-1.209
26	0.13	-0.01686	0.149025	0.010091	0.100035	0.919542	0.004863	0.00851	5.1932	7.3465	0.489855	0.0756	-0.2424	-0.6386	-0.388	-0.5703	-0.5459	-0.2063	-0.3486	-0.6066	-0.0725	0.5583	-0.1159	-0.2899	-1.2053
27	0.135	-0.01648	0.14921	0.010122	0.100197	0.919681	0.004953	0.00913	5.2048	7.3675	0.490055	0.0774	-0.2395	-0.6327	-0.38625	-0.5633	-0.5422	-0.2014	-0.3412	-0.601	-0.0596	0.5618	-0.1102	-0.28775	-1.2018
28	0.14	-0.0161	0.149385	0.010154	0.100364	0.919811	0.005055	0.00975	5.2168	7.3865	0.49027	0.0792	-0.2364	-0.627	-0.3846	-0.5558	-0.5386	-0.1972	-0.3339	-0.5959	-0.0472	0.5652	-0.1048	-0.2858	-1.1979
29	0.145	-0.0157	0.14955	0.010184	0.100518	0.91994	0.005149	0.01035	5.2281	7.405	0.490475	0.0808	-0.2336	-0.6217	-0.38285	-0.5488	-0.5351	-0.1927	-0.3277	-0.5908	-0.0349	0.5685	-0.0991	-0.28355	-1.1939
30	0.15	-0.0153	0.14972	0.010214	0.100661	0.920061	0.005241	0.01094	5.2383	7.424	0.49067	0.0825	-0.2306	-0.6169	-0.38125	-0.5424	-0.5314	-0.1882	-0.3213	-0.586	-0.0245	0.572	-0.0932	-0.28165	-1.1903
31	0.155	-0.01493	0.149885	0.010244	0.10081	0.920183	0.005329	0.01155	5.2484	7.4425	0.490865	0.0841	-0.2277	-0.6113	-0.3796	-0.5362	-0.528	-0.1837	-0.3149	-0.5812	-0.0148	0.5753	-0.0877	-0.27975	-1.187
32	0.16	-0.01456	0.150035	0.010275	0.100968	0.920294	0.005418	0.01214	5.2578	7.46	0.49105	0.0859	-0.225	-0.6061	-0.37805	-0.5302	-0.5243	-0.1795	-0.3092	-0.5766	-0.0052	0.5785	-0.0824	-0.278	-1.1837
33	0.165	-0.01421	0.15019	0.010303	0.101112	0.920418	0.005505	0.01277	5.2673	7.478	0.491235	0.0877	-0.2222	-0.6008	-0.3765	-0.5246	-0.5208	-0.1752	-0.303	-0.5716	0.0041	0.5818	-0.077	-0.2762	-1.1805
34	0.17	-0.01389	0.150335	0.010331	0.101246	0.92054	0.005592	0.01333	5.2778	7.495	0.49141	0.0893	-0.2197	-0.5954	-0.37485	-0.5194	-0.5176	-0.1714	-0.297	-0.5666	0.014	0.5847	-0.0718	-0.2743	-1.1771
35	0.175	-0.01354	0.15048	0.010359	0.101384	0.920653	0.005679	0.01387	5.2871	7.5115	0.49158	0.0909	-0.2174	-0.5903	-0.37335	-0.5139	-0.5145	-0.1675	-0.2909	-0.5622	0.0232	0.5875	-0.0674	-0.27255	-1.1741
36	0.18	-0.0132	0.15062	0.010388	0.101525	0.920761	0.005764	0.01442	5.2966	7.527	0.491755	0.0927	-0.2148	-0.5851	-0.37185	-0.5084	-0.5113	-0.1638	-0.2849	-0.5578	0.0313	0.5905	-0.0625	-0.27075	-1.171
37	0.185	-0.01288	0.15075	0.010415	0.101645	0.920875	0.005844	0.0149	5.3053	7.5435	0.49192	0.0944	-0.2121	-0.5804	-0.3705	-0.5028	-0.5084	-0.16	-0.279	-0.5532	0.04	0.5934	-0.0578	-0.269	-1.1682
38	0.19	-0.01257	0.15089	0.010441	0.101772	0.920989	0.005927	0.01539	5.3138	7.559	0.492085	0.0961	-0.2094	-0.5762	-0.36905	-0.4975	-0.5052	-0.1568	-0.2733	-0.549	0.0484	0.5964	-0.0529	-0.26715	-1.1654
39	0.195	-0.01226	0.15102	0.010467	0.101895	0.921096	0.006007	0.01589	5.3226	7.575	0.49224	0.0977	-0.2068	-0.5717	-0.36755	-0.4919	-0.5024	-0.1536	-0.268	-0.5449	0.0568	0.5993	-0.0478	-0.26545	-1.1627
40	0.2	-0.01195	0.15116	0.010494	0.102015	0.921194	0.006086	0.01633	5.3308	7.59	0.492395	0.0993	-0.2044	-0.5671	-0.36605	-0.4863	-0.4994	-0.1501	-0.2626	-0.5408	0.0648	0.6023	-0.0428	-0.2636	-1.16
41	0.205	-0.01164	0.151305	0.01052	0.102139	0.921293	0.006159	0.0168	5.3394	7.6055	0.492545	0.101	-0.2023	-0.5627	-0.3646	-0.4811	-0.4967	-0.1472	-0.2576	-0.5373	0.073	0.6052	-0.038	-0.26175	-1.1572
42	0.21	-0.01135	0.151445	0.010547	0.102259	0.921396	0.00623	0.01726	5.3478	7.621	0.492705	0.1026	-0.2	-0.5583	-0.3632	-0.4763	-0.4938	-0.144	-0.2524	-0.5338	0.0803	0.6077	-0.0326	-0.25995	-1.1546
43	0.215	-0.01107	0.15158	0.010572	0.10238	0.921492	0.006307	0.01774	5.3562	7.636	0.49286	0.1041	-0.1978	-0.5541	-0.36175	-0.4711	-0.4912	-0.1408	-0.2465	-0.5302	0.0876	0.6104	-0.0276	-0.25825	-1.152
44	0.22	-0.01078	0.151715	0.010598	0.102503	0.921591	0.006389	0.01817	5.3656	7.6515	0.493015	0.1058	-0.1955	-0.55	-0.36035	-0.4664	-0.4883	-0.1378	-0.241	-0.5263	0.0944	0.6131	-0.0231	-0.25665	-1.1496
45	0.225	-0.01049	0.151845	0.010622	0.102622	0.921683	0.006469	0.01864	5.3742	7.666	0.49317	0.1072	-0.1934	-0.5459	-0.359	-0.4615	-0.4855	-0.1348	-0.2358	-0.5222	0.1005	0.6159	-0.0182	-0.25505	-1.1472
46	0.23	-0.01018	0.151975	0.010647	0.102747	0.92177	0.006547	0.01906	5.3829	7.68	0.493325	0.1088	-0.1911	-0.542	-0.35765	-0.4572	-0.4829	-0.1317	-0.2307	-0.5181	0.1068	0.6185	-0.014	-0.2534	-1.1446
47	0.235	-0.00989	0.15212	0.01067	0.102866	0.921863	0.006621	0.0195	5.3909	7.6945	0.493455	0.1104	-0.189	-0.5383	-0.3563	-0.4527	-0.48	-0.1286	-0.2256	-0.5143	0.1126	0.621	-0.0099	-0.2519	-1.142
48	0.24	-0.0096	0.15224	0.010694	0.102981	0.921957	0.006692	0.01992	5.3993	7.709	0.49359	0.112	-0.1867	-0.535	-0.3551	-0.448	-0.4775	-0.1257	-0.2206	-0.5105	0.1182	0.6236	-0.0059	-0.2504	-1.1396
49	0.245	-0.00932	0.152365	0.010719	0.103096	0.922044	0.006765	0.02034	5.4073	7.724	0.493715	0.1137	-0.1845	-0.5312	-0.35385	-0.4437	-0.4749	-0.1229	-0.2155	-0.5066	0.1243	0.6262	-0.0019	-0.24885	-1.1373
50	0.25	-0.00903	0.15248	0.010743	0.103206	0.922134	0.006837	0.02075	5.4157	7.7375	0.49384	0.1152	-0.1823	-0.5274	-0.35255	-0.4395	-0.4721	-0.1201	-0.2105	-0.5025	0.1296	0.6289	0.0021	-0.2473	-1.1348
51	0.255	-0.00876	0.152605	0.010768	0.103313	0.922221	0.006903	0.02117	5.4242	7.7515	0.493975	0.1168	-0.18	-0.5239	-0.35135	-0.4354	-0.4696	-0.1173	-0.2054	-0.4986	0.1349	0.6314	0.0059	-0.2459	-1.1325
52	0.26	-0.00847	0.15272	0.010792	0.103426	0.922301	0.006967	0.02158	5.4327	7.7645	0.49411	0.1185	-0.1778	-0.5203	-0.3501	-0.4312	-0.4671	-0.1144	-0.2003	-0.4948	0.1403	0.6339	0.0096	-0.24445	-1.1303
53	0.265	-0.00821	0.152835	0.010814	0.10353	0.922386	0.007035	0.022	5.4402	7.779	0.49424	0.1201	-0.1755	-0.5169	-0.3489	-0.4269	-0.4646	-0.1115	-0.1954	-0.4909	0.1453	0.6362	0.0129	-0.2429	-1.1281
54	0.27	-0.00795	0.15295	0.010838	0.103649	0.922469	0.00709	0.02238	5.4477	7.7925	0.494375	0.1216	-0.1734	-0.5136	-0.3477	-0.4229	-0.4618	-0.1089	-0.1905	-0.4871	0.1502	0.6387	0.016	-0.24135	-1.1258
55	0.275	-0.00769	0.153065	0.010859	0.103767	0.922554	0.007155	0.02275	5.4557	7.8065	0.494505	0.1232	-0.1711	-0.51	-0.3465	-0.4191	-0.4592	-0.1061	-0.1856	-0.4838	0.155	0.641	0.0195	-0.23985	-1.1233
56	0.28	-0.00744	0.153185	0.010882	0.103877	0.922633	0.007213	0.02311	5.4632	7.8205	0.494625	0.125	-0.1688	-0.5064	-0.3453	-0.4154	-0.4565	-0.1033	-0.1805	-0.4799	0.1601	0.6434	0.0228	-0.23845	-1.121
57	0.285	-0.00718	0.1533	0.010904	0.103987	0.922712	0.007278	0.02347	5.471	7.8335	0.494755	0.1266	-0.1665	-0.5031	-0.34415	-0.4119	-0.4538	-0.1007	-0.1754	-0.4762	0.1649	0.6455	0.0264	-0.237	-1.1187
58	0.29	-0.00691	0.15342	0.010926	0.104102	0.922788	0.007338	0.02387	5.4784	7.847	0.494885	0.1282	-0.1641	-0.4997	-0.34305	-0.408	-0.4511	-0.098	-0.1705	-0.4726	0.17	0.6478	0.0296	-0.23565	-1.1164
59	0.295	-0.00668	0.153525	0.010948	0.104207	0.922874	0.007401	0.02426	5.4864	7.861	0.495015	0.1298	-0.162	-0.4961	-0.3419	-0.4041	-0.4486	-0.0951	-0.1659	-0.469	0.1747	0.6502	0.0331	-0.2343	-1.114
60	0.3	-0.00644	0.15364	0.01097	0.10431	0.92295	0.007456	0.02464	5.4943	7.8745	0.49514	0.1314	-0.1597	-0.4929	-0.34085	-0.4001	-0.4461	-0.0926	-0.1605	-0.4652	0.1793	0.6527	0.0366	-0.23285	-1.1116
61	0.305	-0.00621	0.15375	0.010993	0.104419	0.923025	0.007513	0.02502	5.5021	7.888	0.49526	0.133	-0.1574	-0.4895	-0.3396	-0.3965	-0.4434	-0.0898	-0.1557	-0.4614	0.1836	0.6552	0.0404	-0.2313	-1.1093
62	0.31	-0.00597	0.153855	0.011013	0.104526	0.923097	0.007566	0.02535	5.5098	7.901	0.49538	0.1346	-0.1554	-0.4864	-0.33835	-0.3929	-0.4409	-0.0874	-0.1511	-0.4578	0.188	0.6575	0.0437	-0.23	-1.1068
63	0.315	-0.00573	0.153965	0.011033	0.104633	0.923178	0.007617	0.02574	5.5177	7.9145	0.49549	0.1363	-0.1533	-0.4833	-0.33715	-0.3895	-0.4381	-0.0848	-0.1467	-0.4543	0.1925	0.6596	0.0472	-0.2286	-1.1045
64	0.32	-0.00549	0.154075	0.011054	0.104744	0.923255	0.007674	0.02612	5.5253	7.9275	0.495615	0.1378	-0.151	-0.4799	-0.33605	-0.3861	-0.4354	-0.0824	-0.1423	-0.4507	0.1968	0.6618	0.0505	-0.2272	-1.1022
65	0.325	-0.00526	0.154175	0.011076	0.104853	0.923333	0.007726	0.02648	5.5326	7.9405	0.495735	0.1394	-0.1487	-0.4769	-0.33495	-0.3823	-0.4328	-0.08	-0.138	-0.4472	0.201	0.664	0.0538	-0.22585	-1.0998
66	0.33	-0.00502	0.154275	0.011097	0.10496	0.923407	0.007777	0.02685	5.5396	7.953	0.49586	0.1411	-0.1465	-0.4739	-0.33375	-0.3789	-0.4303	-0.0775	-0.1339	-0.4436	0.2053	0.6663	0.0572	-0.22445	-1.0975
67	0.335	-0.00479	0.15437	0.011116	0.10506	0.923487	0.007834	0.02722	5.5473	7.9655	0.495985	0.1426	-0.1441	-0.4707	-0.33265	-0.3756	-0.4278	-0.0749	-0.1299	-0.4402	0.2098	0.6685	0.0603	-0.22305	-1.0951
68	0.34	-0.00456	0.154475	0.011137	0.105168	0.923562	0.007887	0.02761	5.5545	7.9775	0.496105	0.1442	-0.1418	-0.4673	-0.33155	-0.3724	-0.4254	-0.0722	-0.1259	-0.4367	0.2142	0.6706	0.0633	-0.2216	-1.0926
69	0.345	-0.00434	0.15457	0.011158	0.105264	0.923636	0.007937	0.02795	5.5617	7.991	0.496225	0.1458	-0.1395	-0.4645	-0.3305	-0.3695	-0.4228	-0.0698	-0.1219	-0.4332	0.2186	0.6727	0.0663	-0.22015	-1.0903
70	0.35	-0.00411	0.15467	0.011179	0.105364	0.923712	0.007985	0.02832	5.569	8.0035	0.49634	0.1474	-0.1372	-0.4616	-0.3295	-0.3664	-0.4205	-0.0673	-0.1183	-0.4295	0.2231	0.6749	0.0692	-0.2187	-1.0881
71	0.355	-0.00387	0.154775	0.0112	0.105462	0.923792	0.008035	0.02868	5.5765	8.0165	0.496465	0.149	-0.135	-0.4583	-0.32845	-0.3633	-0.4179	-0.0651	-0.1146	-0.4262	0.2279	0.677	0.0719	-0.21715	-1.0858
72	0.36	-0.00365	0.154875	0.011222	0.105557	0.923868	0.008085	0.02902	5.5838	8.0295	0.49659	0.1505	-0.133	-0.4554	-0.3274	-0.3601	-0.4154	-0.0625	-0.1107	-0.4229	0.2324	0.6791	0.0745	-0.21565	-1.0833
73	0.365	-0.00343	0.154975	0.011243	0.105648	0.923943	0.008133	0.02938	5.5912	8.042	0.49671	0.1521	-0.131	-0.4524	-0.32635	-0.357	-0.4129	-0.0602	-0.1069	-0.4197	0.2373	0.6813	0.0775	-0.214	-1.081
74	0.37	-0.0032	0.155075	0.011264	0.105747	0.924024	0.008186	0.02975	5.5983	8.055	0.496825	0.1538	-0.1289	-0.4495	-0.3253	-0.354	-0.4104	-0.0578	-0.103	-0.4162	0.2416	0.6835	0.0802	-0.2124	-1.0788
75	0.375	-0.00298	0.15518	0.011285	0.105844	0.924102	0.008235	0.03009	5.6061	8.067	0.49694	0.1554	-0.1269	-0.4465	-0.3243	-0.351	-0.4079	-0.0557	-0.0991	-0.4127	0.2464	0.6857	0.0829	-0.2109	-1.0765
76	0.38	-0.00276	0.15528	0.011305	0.105945	0.924174	0.008286	0.03044	5.6132	8.08	0.497065	0.157	-0.125	-0.444	-0.3232	-0.3481	-0.4054	-0.0534	-0.0953	-0.4093	0.251	0.6879	0.0854	-0.20945	-1.0741
77	0.385	-0.00253	0.15538	0.011326	0.106044	0.924249	0.008333	0.03078	5.6203	8.0925	0.49719	0.1587	-0.123	-0.4413	-0.3222	-0.3451	-0.403	-0.0511	-0.0912	-0.4061	0.2554	0.6902	0.088	-0.208	-1.072
78	0.39	-0.00229	0.155475	0.011347	0.106142	0.924318	0.008382	0.03114	5.6275	8.106	0.497295	0.1604	-0.1208	-0.4386	-0.3211	-0.342	-0.4004	-0.049	-0.0874	-0.4028	0.2599	0.6924	0.0906	-0.20645	-1.0695
79	0.395	-0.00206	0.155575	0.011368	0.106238	0.924384	0.008427	0.03148	5.6343	8.119	0.497415	0.1621	-0.1188	-0.4358	-0.32005	-0.3389	-0.3978	-0.0467	-0.0839	-0.3994	0.2647	0.6945	0.0935	-0.20505	-1.0672
80	0.4	-0.00184	0.15567	0.01139	0.106326	0.924459	0.008476	0.03183	5.6409	8.1315	0.49753	0.1637	-0.1169	-0.4331	-0.3191	-0.3358	-0.3952	-0.0442	-0.0804	-0.396	0.2693	0.6966	0.0963	-0.2036	-1.0648
81	0.405	-0.00163	0.15576	0.01141	0.106422	0.924534	0.008523	0.03218	5.6479	8.144	0.49764	0.1652	-0.1146	-0.4306	-0.3181	-0.3329	-0.3928	-0.0418	-0.0769	-0.3927	0.2737	0.6987	0.099	-0.2021	-1.0625
82	0.41	-0.0014	0.155855	0.01143	0.10652	0.924606	0.008571	0.03252	5.6554	8.158	0.49776	0.1669	-0.1127	-0.4277	-0.3171	-0.33	-0.3901	-0.0393	-0.0733	-0.3896	0.2781	0.7011	0.1015	-0.20065	-1.0601
83	0.415	-0.00118	0.15596	0.011449	0.106616	0.924681	0.00862	0.03287	5.662	8.1705	0.49787	0.1685	-0.1105	-0.4251	-0.31605	-0.3267	-0.3874	-0.037	-0.0696	-0.3861	0.2827	0.7033	0.1038	-0.19915	-1.0578
84	0.42	-0.00096	0.15606	0.011469	0.106713	0.924755	0.008667	0.03321	5.6689	8.185	0.49799	0.1702	-0.1084	-0.4223	-0.315	-0.3235	-0.3848	-0.0345	-0.0656	-0.3826	0.2872	0.7058	0.106	-0.1976	-1.0554
85	0.425	-0.00076	0.15617	0.011489	0.106809	0.924828	0.008716	0.03355	5.6758	8.198	0.4981	0.1719	-0.1064	-0.4196	-0.31395	-0.3202	-0.3822	-0.0323	-0.0618	-0.3791	0.2912	0.7083	0.1083	-0.19605	-1.053
86	0.43	-0.00054	0.156275	0.011509	0.106903	0.924899	0.008763	0.03388	5.683	8.2115	0.49822	0.1737	-0.1043	-0.4169	-0.3129	-0.3172	-0.3797	-0.0299	-0.0582	-0.3759	0.2955	0.7106	0.1106	-0.19455	-1.0508
87	0.435	-0.00033	0.15637	0.011529	0.106999	0.924968	0.008811	0.03423	5.6898	8.225	0.49834	0.1754	-0.1023	-0.4142	-0.3118	-0.3143	-0.377	-0.0276	-0.0545	-0.3725	0.2999	0.713	0.1128	-0.19305	-1.0485
88	0.44	-0.00011	0.156465	0.011549	0.107086	0.925035	0.008861	0.03454	5.6964	8.2375	0.49845	0.1772	-0.1003	-0.4115	-0.31075	-0.3113	-0.3745	-0.0253	-0.051	-0.3692	0.3045	0.7155	0.1152	-0.19165	-1.0464
89	0.445	0.00012	0.15656	0.011568	0.107184	0.925102	0.008907	0.0349	5.7034	8.249	0.49856	0.1789	-0.0984	-0.4091	-0.3096	-0.3082	-0.3718	-0.0229	-0.0475	-0.366	0.309	0.7178	0.1175	-0.19025	-1.0441
90	0.45	0.00033	0.156665	0.011588	0.107279	0.925173	0.008954	0.03525	5.71	8.262	0.49868	0.1806	-0.0964	-0.4066	-0.30845	-0.3053	-0.3689	-0.0205	-0.0439	-0.3627	0.313	0.7198	0.1199	-0.1889	-1.0417
91	0.455	0.00053	0.156765	0.011607	0.107372	0.925241	0.009001	0.03558	5.7168	8.274	0.4988	0.1825	-0.0943	-0.4042	-0.3073	-0.3024	-0.3661	-0.0182	-0.0402	-0.3592	0.3166	0.7221	0.1222	-0.18735	-1.0395
92	0.46	0.00075	0.156865	0.011626	0.107471	0.925311	0.009046	0.03592	5.724	8.2875	0.49891	0.1843	-0.0924	-0.4017	-0.30615	-0.2994	-0.3634	-0.0159	-0.0365	-0.3556	0.3205	0.7245	0.1246	-0.18595	-1.0374
93	0.465	0.00096	0.156965	0.011646	0.107562	0.925376	0.00909	0.03628	5.731	8.3005	0.499025	0.1862	-0.0903	-0.3993	-0.30495	-0.2964	-0.3608	-0.0136	-0.0331	-0.3521	0.3248	0.7268	0.1268	-0.18455	-1.0352
94	0.47	0.00117	0.157065	0.011666	0.107659	0.925448	0.009134	0.03664	5.7381	8.3135	0.49914	0.1882	-0.0884	-0.3969	-0.30385	-0.2935	-0.3581	-0.0115	-0.0299	-0.3487	0.3286	0.7292	0.1289	-0.18315	-1.0329
95	0.475	0.00139	0.15716	0.011684	0.107751	0.925516	0.009178	0.03699	5.7451	8.3265	0.499255	0.1901	-0.0863	-0.3945	-0.30265	-0.2905	-0.3555	-0.0092	-0.0263	-0.3453	0.3322	0.7316	0.1309	-0.1818	-1.0307
96	0.48	0.00162	0.157265	0.011703	0.107845	0.925583	0.009224	0.03733	5.7526	8.34	0.499365	0.1921	-0.0843	-0.3922	-0.3016	-0.2874	-0.3528	-0.0069	-0.0225	-0.3414	0.3358	0.7339	0.1329	-0.1804	-1.0284
97	0.485	0.00183	0.15736	0.011722	0.107937	0.925652	0.009269	0.03767	5.7597	8.3535	0.499475	0.1939	-0.0825	-0.3898	-0.30045	-0.2843	-0.3502	-0.0046	-0.0191	-0.3378	0.3393	0.7364	0.135	-0.1791	-1.0264
98	0.49	0.00206	0.15747	0.011741	0.108032	0.92572	0.009315	0.03798	5.7673	8.366	0.499585	0.1958	-0.0806	-0.3874	-0.2993	-0.2815	-0.3475	-0.0024	-0.0155	-0.3344	0.3431	0.7387	0.1371	-0.17775	-1.0242
99	0.495	0.00226	0.15756	0.01176	0.10812	0.92579	0.009363	0.03834	5.7737	8.3795	0.499705	0.1977	-0.0786	-0.3848	-0.29815	-0.2783	-0.3446	0	-0.0119	-0.331	0.3466	0.7411	0.1391	-0.1764	-1.0217
100	0.5	0.00248	0.157665	0.011779	0.10821	0.925861	0.009408	0.03869	5.781	8.392	0.499825	0.1997	-0.0768	-0.3821	-0.297	-0.2753	-0.3418	0.0023	-0.0085	-0.3275	0.3503	0.7437	0.1408	-0.175	-1.0194
101	0.505	0.0027	0.15776	0.011798	0.108301	0.925934	0.009454	0.03903	5.7877	8.405	0.499935	0.2016	-0.0748	-0.3799	-0.2959	-0.2721	-0.3389	0.0046	-0.0052	-0.3241	0.3537	0.7463	0.1428	-0.17365	-1.0174
102	0.51	0.0029	0.15786	0.011818	0.108391	0.926005	0.009501	0.03938	5.7946	8.418	0.500045	0.2036	-0.0727	-0.3775	-0.29485	-0.269	-0.3363	0.0068	-0.0019	-0.3208	0.3574	0.7492	0.1447	-0.17225	-1.0152
103	0.515	0.00313	0.15796	0.011837	0.108484	0.926077	0.009549	0.03974	5.8019	8.4325	0.50015	0.2056	-0.0707	-0.375	-0.29375	-0.2657	-0.3334	0.0093	0.0013	-0.3174	0.3608	0.7518	0.1466	-0.17075	-1.0131
104	0.52	0.00334	0.15805	0.011859	0.108573	0.926142	0.009594	0.04009	5.8093	8.446	0.500255	0.2076	-0.0686	-0.3723	-0.29255	-0.2626	-0.3304	0.0114	0.0048	-0.3138	0.3642	0.7545	0.1484	-0.1693	-1.0111
105	0.525	0.00355	0.15815	0.011878	0.108666	0.92621	0.009638	0.04042	5.8163	8.459	0.50037	0.2097	-0.0666	-0.3698	-0.2915	-0.2595	-0.3274	0.0136	0.008	-0.3101	0.3678	0.7573	0.1504	-0.16785	-1.0089
106	0.53	0.00377	0.158245	0.011899	0.108754	0.926281	0.009683	0.04076	5.8229	8.4725	0.500475	0.2119	-0.0645	-0.3673	-0.29045	-0.2565	-0.3244	0.0159	0.0112	-0.3069	0.3717	0.7601	0.152	-0.16645	-1.0066
107	0.535	0.00399	0.158345	0.011921	0.108848	0.926352	0.00973	0.04113	5.8305	8.4855	0.500585	0.2142	-0.0625	-0.3649	-0.28925	-0.2536	-0.3212	0.018	0.0145	-0.3037	0.3753	0.7626	0.1538	-0.165	-1.0045
108	0.54	0.00423	0.158445	0.011943	0.108935	0.92642	0.009775	0.04148	5.8381	8.499	0.500695	0.2164	-0.0604	-0.3625	-0.2881	-0.2506	-0.3181	0.0203	0.018	-0.3003	0.379	0.7651	0.1557	-0.1635	-1.0022
109	0.545	0.00445	0.15854	0.011964	0.109034	0.926486	0.00982	0.0418	5.8458	8.512	0.50081	0.2187	-0.0583	-0.3603	-0.28705	-0.2479	-0.315	0.0226	0.0213	-0.2969	0.3832	0.7677	0.1575	-0.16195	-0.9998
110	0.55	0.00468	0.15864	0.011985	0.109129	0.926558	0.009867	0.04216	5.853	8.5265	0.50092	0.2208	-0.0561	-0.3576	-0.28595	-0.245	-0.3114	0.0247	0.0248	-0.2934	0.3871	0.7701	0.1595	-0.1605	-0.9975
111	0.555	0.0049	0.15874	0.012006	0.10923	0.92663	0.009913	0.0425	5.8605	8.541	0.50103	0.2229	-0.0539	-0.355	-0.2849	-0.2421	-0.308	0.0268	0.0281	-0.2901	0.3908	0.7727	0.1614	-0.15895	-0.9953
112	0.56	0.00513	0.158835	0.012027	0.109322	0.926701	0.009967	0.04284	5.8685	8.5535	0.50113	0.225	-0.0518	-0.3522	-0.28365	-0.2389	-0.3049	0.0291	0.0315	-0.2864	0.3948	0.7753	0.1633	-0.1574	-0.9932
113	0.565	0.00535	0.158935	0.012047	0.109421	0.926776	0.010015	0.04316	5.8763	8.5675	0.501235	0.2271	-0.0498	-0.3495	-0.28255	-0.2361	-0.3015	0.0314	0.0346	-0.2831	0.3986	0.7779	0.1651	-0.15595	-0.9909
114	0.57	0.00558	0.159035	0.012067	0.109517	0.926851	0.010063	0.04353	5.8841	8.5805	0.50134	0.2293	-0.0478	-0.3469	-0.28125	-0.2334	-0.2984	0.0336	0.0376	-0.2796	0.4026	0.7804	0.167	-0.1544	-0.9887
115	0.575	0.0058	0.159135	0.012087	0.109614	0.926928	0.010113	0.04387	5.8923	8.5955	0.501455	0.2316	-0.0459	-0.3443	-0.28005	-0.2307	-0.2949	0.0358	0.0408	-0.276	0.4062	0.783	0.1688	-0.1529	-0.9865
116	0.58	0.006	0.15924	0.012107	0.109701	0.927001	0.010162	0.04422	5.9002	8.61	0.501575	0.2339	-0.0439	-0.3412	-0.2788	-0.2281	-0.2917	0.0382	0.0441	-0.2722	0.41	0.7856	0.1706	-0.15145	-0.9844
117	0.585	0.00621	0.159335	0.012129	0.109795	0.927075	0.010212	0.04456	5.9079	8.6235	0.50168	0.2362	-0.0418	-0.3384	-0.2776	-0.2252	-0.2885	0.0403	0.0473	-0.2685	0.4138	0.7883	0.1724	-0.14985	-0.9823
118	0.59	0.00646	0.159435	0.012151	0.109887	0.927147	0.010261	0.04491	5.9155	8.637	0.501785	0.2388	-0.0397	-0.3355	-0.27635	-0.2224	-0.2854	0.0424	0.0505	-0.2644	0.4179	0.7909	0.1741	-0.1483	-0.9801
119	0.595	0.00669	0.15954	0.012174	0.109984	0.927215	0.010313	0.04523	5.9235	8.651	0.501895	0.2413	-0.0375	-0.3326	-0.27515	-0.2199	-0.2818	0.0446	0.0535	-0.2604	0.4218	0.7934	0.1759	-0.1469	-0.9778
120	0.6	0.00691	0.15964	0.012195	0.110088	0.927284	0.010366	0.04559	5.9313	8.665	0.502005	0.2437	-0.0352	-0.3296	-0.27395	-0.2172	-0.2783	0.0468	0.0566	-0.2561	0.4256	0.7958	0.1777	-0.14535	-0.9755
121	0.605	0.00714	0.15974	0.012216	0.110185	0.927359	0.010413	0.04594	5.9391	8.68	0.50212	0.2461	-0.0331	-0.3267	-0.2727	-0.2145	-0.2744	0.0493	0.0597	-0.2521	0.4292	0.7983	0.1794	-0.14375	-0.9732
122	0.61	0.00737	0.159845	0.012238	0.11028	0.927439	0.010463	0.04632	5.947	8.694	0.502235	0.2486	-0.0307	-0.3235	-0.2714	-0.2118	-0.2708	0.0518	0.063	-0.2482	0.4332	0.8008	0.1813	-0.14215	-0.9708
123	0.615	0.00759	0.15995	0.01226	0.110374	0.927513	0.01051	0.04669	5.9552	8.71	0.502345	0.2511	-0.0283	-0.3203	-0.27	-0.2092	-0.2671	0.054	0.0662	-0.2436	0.437	0.8033	0.1832	-0.1405	-0.9686
124	0.62	0.00783	0.16006	0.012282	0.110467	0.927584	0.010559	0.04705	5.9631	8.7245	0.502455	0.2536	-0.0259	-0.3171	-0.26875	-0.2066	-0.2634	0.0563	0.0694	-0.2393	0.441	0.806	0.1847	-0.13895	-0.9662
125	0.625	0.00805	0.160165	0.012305	0.110574	0.927651	0.010612	0.04738	5.9716	8.739	0.50256	0.2564	-0.0234	-0.3139	-0.2675	-0.204	-0.2597	0.0585	0.0726	-0.2352	0.4448	0.8083	0.1866	-0.13735	-0.9637
126	0.63	0.00828	0.160265	0.012327	0.110674	0.927723	0.010659	0.04774	5.9802	8.7545	0.50268	0.259	-0.0211	-0.3105	-0.26625	-0.2013	-0.2556	0.0609	0.0758	-0.2311	0.4488	0.8111	0.1884	-0.13565	-0.9612
127	0.635	0.0085	0.16037	0.012351	0.110773	0.927792	0.01071	0.04812	5.9882	8.769	0.502785	0.2616	-0.0187	-0.3073	-0.265	-0.1987	-0.2518	0.0633	0.0791	-0.2268	0.4533	0.8136	0.1903	-0.13415	-0.9588
128	0.64	0.00872	0.16048	0.012373	0.110876	0.927867	0.010762	0.04847	5.9965	8.7835	0.5029	0.2642	-0.0164	-0.3039	-0.26375	-0.1957	-0.2478	0.0658	0.0823	-0.2227	0.4576	0.8165	0.192	-0.13255	-0.9564
129	0.645	0.00894	0.16058	0.012396	0.110979	0.92794	0.010812	0.04883	6.0049	8.7985	0.503015	0.2672	-0.0141	-0.3006	-0.2624	-0.1931	-0.244	0.068	0.0856	-0.2188	0.4617	0.8192	0.1937	-0.1309	-0.9541
130	0.65	0.00917	0.160685	0.012419	0.11109	0.928008	0.010861	0.04917	6.0136	8.8135	0.50313	0.2699	-0.0119	-0.2976	-0.26105	-0.1903	-0.2398	0.0701	0.0887	-0.2148	0.4661	0.8218	0.1954	-0.1293	-0.9515
131	0.655	0.0094	0.160785	0.012442	0.11119	0.928083	0.010911	0.04953	6.0223	8.828	0.503255	0.2726	-0.0095	-0.2945	-0.2597	-0.1874	-0.2355	0.0723	0.0919	-0.2108	0.47	0.8244	0.1971	-0.1276	-0.9492
132	0.66	0.00964	0.160895	0.012464	0.111288	0.928156	0.010962	0.04993	6.031	8.843	0.50338	0.2755	-0.007	-0.2913	-0.2583	-0.1847	-0.2315	0.0748	0.0953	-0.2067	0.4741	0.8271	0.1989	-0.12605	-0.9467
133	0.665	0.00989	0.16101	0.012486	0.111389	0.928229	0.011013	0.05032	6.0398	8.8585	0.503505	0.2784	-0.0046	-0.2876	-0.2569	-0.182	-0.2273	0.0771	0.0988	-0.2017	0.4784	0.8299	0.2006	-0.12435	-0.9442
134	0.67	0.01011	0.16112	0.012512	0.111496	0.9283	0.011064	0.0507	6.0486	8.8735	0.503625	0.2814	-0.002	-0.2838	-0.25545	-0.1791	-0.2232	0.0795	0.1023	-0.1971	0.4823	0.8328	0.2025	-0.12255	-0.9416
135	0.675	0.01036	0.16122	0.012535	0.111618	0.928375	0.011116	0.05109	6.0581	8.888	0.503745	0.2843	0.0004	-0.2799	-0.2539	-0.1761	-0.2191	0.082	0.1054	-0.193	0.4863	0.8354	0.2042	-0.1208	-0.9388
136	0.68	0.0106	0.161335	0.012559	0.11173	0.928453	0.011168	0.05146	6.0671	8.902	0.50387	0.2873	0.0027	-0.2761	-0.25235	-0.1733	-0.2151	0.0845	0.1086	-0.1886	0.4909	0.8382	0.2059	-0.119	-0.9364
137	0.685	0.01085	0.16144	0.012583	0.111838	0.928529	0.011223	0.05188	6.076	8.918	0.50399	0.2903	0.005	-0.2717	-0.2508	-0.1702	-0.211	0.0872	0.112	-0.1842	0.495	0.8409	0.2078	-0.1171	-0.934
138	0.69	0.0111	0.16154	0.012608	0.111945	0.928605	0.011277	0.05228	6.0849	8.9325	0.504125	0.2933	0.0074	-0.2671	-0.24935	-0.1672	-0.2068	0.0896	0.1153	-0.1796	0.4989	0.8439	0.2096	-0.1152	-0.9314
139	0.695	0.01135	0.161655	0.01263	0.112051	0.928684	0.011335	0.05266	6.0939	8.9485	0.504255	0.2962	0.0097	-0.2631	-0.2478	-0.1642	-0.2026	0.092	0.1187	-0.175	0.503	0.8468	0.2114	-0.11315	-0.9288
140	0.7	0.01158	0.161765	0.012653	0.112165	0.928757	0.01139	0.05306	6.103	8.9635	0.504375	0.2995	0.0123	-0.2583	-0.2464	-0.1612	-0.1985	0.0944	0.1219	-0.1705	0.5069	0.8496	0.213	-0.11135	-0.9262
141	0.705	0.01184	0.161865	0.012676	0.112277	0.928837	0.011444	0.05347	6.1116	8.979	0.5045	0.3027	0.0147	-0.2535	-0.24485	-0.1581	-0.1942	0.0969	0.1251	-0.1661	0.5108	0.8528	0.2148	-0.1094	-0.9234
142	0.71	0.01213	0.161975	0.0127	0.112382	0.928919	0.011501	0.05391	6.1216	8.997	0.504635	0.3062	0.0173	-0.2488	-0.2433	-0.1549	-0.1898	0.0995	0.1285	-0.1613	0.5151	0.8559	0.2166	-0.1074	-0.9208
143	0.715	0.0124	0.162085	0.012723	0.112501	0.928998	0.01156	0.05434	6.1312	9.013	0.504765	0.3093	0.02	-0.244	-0.2418	-0.1516	-0.1851	0.1019	0.1317	-0.1565	0.5196	0.859	0.2185	-0.1055	-0.9179
144	0.72	0.01266	0.162195	0.012749	0.112612	0.92908	0.011614	0.05474	6.1402	9.0285	0.50489	0.3126	0.0225	-0.2389	-0.24025	-0.1482	-0.1801	0.1045	0.1351	-0.1519	0.5237	0.8623	0.2203	-0.1036	-0.9151
145	0.725	0.01292	0.162315	0.012774	0.112729	0.929162	0.011673	0.05514	6.15	9.045	0.50502	0.3158	0.0251	-0.2335	-0.23865	-0.145	-0.1755	0.107	0.1385	-0.1475	0.528	0.8656	0.2221	-0.10155	-0.9125
146	0.73	0.0132	0.16243	0.0128	0.112849	0.929243	0.011728	0.05555	6.1593	9.0625	0.505145	0.3189	0.0277	-0.2283	-0.23705	-0.1419	-0.1708	0.1094	0.1419	-0.1429	0.5324	0.869	0.2238	-0.09955	-0.9096
147	0.735	0.01347	0.162545	0.012823	0.112971	0.929319	0.011787	0.05597	6.1689	9.0795	0.505275	0.3224	0.0303	-0.2228	-0.23535	-0.1388	-0.166	0.1122	0.1456	-0.1383	0.5366	0.8724	0.2254	-0.09755	-0.9068
148	0.74	0.01374	0.16266	0.012847	0.113087	0.929401	0.011844	0.05639	6.1784	9.096	0.505415	0.3259	0.033	-0.2173	-0.23375	-0.1355	-0.1609	0.1149	0.1489	-0.1336	0.541	0.8761	0.2272	-0.09555	-0.9038
149	0.745	0.014	0.162785	0.012874	0.113219	0.92948	0.011899	0.0568	6.189	9.1145	0.505545	0.3294	0.0353	-0.2125	-0.23205	-0.1323	-0.1558	0.118	0.1521	-0.129	0.5453	0.88	0.2291	-0.09365	-0.9008
150	0.75	0.01427	0.1629	0.012901	0.11334	0.929566	0.011958	0.05721	6.1994	9.1335	0.505685	0.333	0.0379	-0.2069	-0.23045	-0.1294	-0.1502	0.1211	0.1556	-0.124	0.5497	0.884	0.2308	-0.09155	-0.8977
151	0.755	0.01456	0.163015	0.012927	0.113466	0.929654	0.012012	0.05767	6.2091	9.152	0.505825	0.337	0.0406	-0.202	-0.2287	-0.1262	-0.1449	0.124	0.1595	-0.1187	0.5544	0.8882	0.2326	-0.0895	-0.8948
152	0.76	0.01485	0.16314	0.012954	0.113592	0.929739	0.012073	0.05811	6.2191	9.1705	0.50597	0.3409	0.0433	-0.1971	-0.227	-0.1231	-0.1402	0.127	0.1631	-0.1136	0.5589	0.8923	0.2345	-0.08745	-0.8917
153	0.765	0.01513	0.16326	0.012981	0.113727	0.929824	0.012133	0.05856	6.2296	9.19	0.50611	0.3446	0.046	-0.1915	-0.2251	-0.1198	-0.1346	0.1299	0.1665	-0.1082	0.5636	0.8964	0.2363	-0.08535	-0.8888
154	0.77	0.01542	0.16338	0.01301	0.113855	0.929912	0.01219	0.05898	6.2414	9.2095	0.506265	0.3485	0.0488	-0.1859	-0.2233	-0.1165	-0.1292	0.1331	0.1698	-0.1027	0.5683	0.9005	0.2381	-0.0833	-0.8857
155	0.775	0.01569	0.163495	0.013038	0.113992	0.929996	0.012251	0.05945	6.2523	9.229	0.506405	0.3529	0.0518	-0.1806	-0.2214	-0.1131	-0.1241	0.1362	0.1733	-0.0974	0.5732	0.9049	0.24	-0.0811	-0.8824
156	0.78	0.016	0.16362	0.013067	0.114125	0.93008	0.012312	0.05989	6.2642	9.2495	0.506545	0.3571	0.0547	-0.1747	-0.2195	-0.1096	-0.1181	0.1394	0.1767	-0.0918	0.5781	0.9092	0.2418	-0.07905	-0.8791
157	0.785	0.01631	0.163745	0.013093	0.114269	0.930166	0.012369	0.06037	6.2751	9.2705	0.506695	0.3611	0.0576	-0.1692	-0.2177	-0.1059	-0.1129	0.1426	0.1803	-0.0862	0.5824	0.9133	0.2437	-0.07685	-0.8756
158	0.79	0.01661	0.16388	0.013122	0.114408	0.930259	0.012429	0.06087	6.2864	9.2915	0.50685	0.3653	0.0605	-0.1638	-0.2156	-0.1021	-0.1071	0.1458	0.1839	-0.0805	0.5875	0.9177	0.2456	-0.0747	-0.8722
159	0.795	0.01692	0.16401	0.013153	0.114561	0.930354	0.012497	0.06136	6.2991	9.311	0.507	0.3703	0.0639	-0.1585	-0.21355	-0.0985	-0.1016	0.1489	0.1877	-0.075	0.5925	0.9221	0.2475	-0.07255	-0.8686
160	0.8	0.01721	0.16415	0.013181	0.114709	0.930456	0.01256	0.06184	6.3106	9.332	0.50716	0.3748	0.0673	-0.153	-0.21145	-0.0948	-0.0961	0.152	0.1914	-0.0692	0.5975	0.9267	0.2494	-0.07025	-0.8649
161	0.805	0.01754	0.16429	0.013212	0.114862	0.93055	0.012623	0.06228	6.3227	9.352	0.507315	0.3801	0.0709	-0.1476	-0.20925	-0.091	-0.0907	0.1552	0.1951	-0.0632	0.6025	0.9315	0.2514	-0.06805	-0.8611
162	0.81	0.01786	0.164425	0.013242	0.115015	0.930645	0.012688	0.06278	6.336	9.3735	0.50748	0.3852	0.0745	-0.1423	-0.20705	-0.0871	-0.0852	0.1585	0.1987	-0.0575	0.6074	0.936	0.2534	-0.06575	-0.8571
163	0.815	0.01819	0.164555	0.013274	0.115169	0.930742	0.012759	0.06323	6.348	9.399	0.50765	0.3901	0.078	-0.1363	-0.20465	-0.0832	-0.0796	0.1618	0.2027	-0.0518	0.6121	0.9402	0.2555	-0.0632	-0.8528
164	0.82	0.01854	0.1647	0.013307	0.115329	0.930847	0.012832	0.06372	6.362	9.422	0.50782	0.3958	0.0818	-0.1307	-0.2021	-0.0795	-0.074	0.1651	0.2065	-0.0458	0.6169	0.9446	0.2576	-0.06055	-0.8484
165	0.825	0.01891	0.164845	0.013339	0.115487	0.930953	0.012902	0.06421	6.3743	9.445	0.50798	0.4015	0.0856	-0.1251	-0.19975	-0.0755	-0.0682	0.1685	0.2107	-0.0403	0.6216	0.9493	0.2594	-0.058	-0.8435
166	0.83	0.01925	0.164995	0.01337	0.11565	0.931061	0.012976	0.06477	6.3877	9.4695	0.50815	0.4075	0.09	-0.1198	-0.19735	-0.0719	-0.0626	0.172	0.2148	-0.0342	0.6264	0.9542	0.2615	-0.0554	-0.8387
167	0.835	0.01957	0.16515	0.013407	0.115818	0.931168	0.013053	0.06528	6.4005	9.4935	0.50833	0.4133	0.0939	-0.1144	-0.1949	-0.0678	-0.0569	0.1754	0.219	-0.0278	0.6317	0.9597	0.2635	-0.0527	-0.8341
168	0.84	0.0199	0.16532	0.013442	0.116001	0.931277	0.013125	0.06581	6.414	9.5175	0.50851	0.4191	0.0982	-0.1093	-0.19225	-0.0639	-0.0509	0.1792	0.223	-0.022	0.6365	0.9642	0.2655	-0.05	-0.8293
169	0.845	0.02027	0.165475	0.013477	0.116191	0.931396	0.013207	0.06634	6.4272	9.544	0.508695	0.4255	0.1027	-0.1039	-0.18975	-0.0602	-0.0448	0.183	0.227	-0.0157	0.642	0.9688	0.2675	-0.04705	-0.8237
170	0.85	0.02065	0.16563	0.013514	0.116369	0.931501	0.013291	0.06685	6.4403	9.5695	0.508895	0.432	0.1074	-0.0974	-0.18715	-0.0565	-0.0386	0.1864	0.2311	-0.0096	0.6471	0.9732	0.2697	-0.04415	-0.8182
171	0.855	0.02102	0.165795	0.01355	0.116556	0.931617	0.013373	0.06741	6.4524	9.5955	0.50909	0.4389	0.1123	-0.0906	-0.18465	-0.0522	-0.0321	0.1904	0.2354	-0.0032	0.6524	0.9779	0.2716	-0.0413	-0.8125
172	0.86	0.02138	0.16596	0.013585	0.116742	0.93174	0.013464	0.06792	6.4665	9.6235	0.50929	0.4458	0.1175	-0.0841	-0.18185	-0.0476	-0.026	0.1942	0.2394	0.0037	0.658	0.9833	0.274	-0.03825	-0.8075
173	0.865	0.02176	0.16612	0.013625	0.116932	0.931861	0.013553	0.06848	6.4802	9.649	0.509515	0.4529	0.1231	-0.0779	-0.17905	-0.0433	-0.0192	0.1984	0.2436	0.0107	0.6631	0.9884	0.2763	-0.03515	-0.8021
174	0.87	0.02215	0.16631	0.013664	0.117135	0.931975	0.013651	0.06903	6.4952	9.681	0.509725	0.4606	0.1287	-0.0711	-0.1762	-0.0392	-0.0126	0.2027	0.2475	0.0181	0.6691	0.9939	0.2786	-0.03205	-0.7966
175	0.875	0.02254	0.16648	0.013705	0.117351	0.9321	0.013748	0.06962	6.5106	9.71	0.509945	0.4678	0.1349	-0.0647	-0.17345	-0.0347	-0.0058	0.2069	0.2516	0.0253	0.6745	1	0.281	-0.02885	-0.7909
176	0.88	0.02296	0.166665	0.013747	0.117563	0.932225	0.013842	0.07026	6.526	9.741	0.51018	0.4758	0.1411	-0.0572	-0.17055	-0.0298	0.0003	0.2112	0.2561	0.0334	0.6799	1.0056	0.2835	-0.02525	-0.7847
177	0.885	0.02339	0.16685	0.01379	0.117789	0.932356	0.013941	0.0709	6.5422	9.775	0.510415	0.484	0.1475	-0.0501	-0.16765	-0.0249	0.007	0.2155	0.2605	0.0417	0.6856	1.0129	0.286	-0.02155	-0.7789
178	0.89	0.02384	0.16706	0.013832	0.118003	0.932491	0.014046	0.07157	6.5591	9.8105	0.51064	0.4927	0.1546	-0.0435	-0.1647	-0.0202	0.0143	0.2206	0.2656	0.0492	0.6925	1.0194	0.2885	-0.01785	-0.7723
179	0.895	0.02428	0.167275	0.013876	0.118233	0.932624	0.014147	0.07226	6.5756	9.849	0.51091	0.5017	0.1622	-0.0371	-0.1615	-0.0157	0.0222	0.2258	0.2708	0.0579	0.6986	1.0265	0.2913	-0.01405	-0.7652
180	0.9	0.02476	0.16748	0.013918	0.118467	0.932768	0.014255	0.07295	6.5959	9.8895	0.511165	0.5114	0.1693	-0.0298	-0.1583	-0.0109	0.0299	0.2312	0.2761	0.0668	0.7052	1.0338	0.2938	-0.0094	-0.7582
181	0.905	0.02529	0.16772	0.013965	0.118711	0.932902	0.014372	0.07369	6.6175	9.931	0.51142	0.5218	0.1768	-0.0228	-0.1544	-0.006	0.0374	0.2362	0.2814	0.0776	0.7122	1.0419	0.2966	-0.00445	-0.7506
182	0.91	0.0258	0.16797	0.014019	0.118967	0.933063	0.014488	0.0744	6.6385	9.975	0.511705	0.5321	0.1835	-0.015	-0.15055	-0.0013	0.0454	0.2418	0.2868	0.0888	0.7194	1.051	0.2995	0.0001	-0.7432
183	0.915	0.02633	0.168225	0.014071	0.119209	0.933225	0.014611	0.07521	6.6609	10.0185	0.511985	0.5433	0.1902	-0.0064	-0.14635	0.0037	0.0541	0.2476	0.292	0.1003	0.7267	1.0614	0.3023	0.00485	-0.7353
184	0.92	0.02693	0.1685	0.014123	0.11949	0.933375	0.014744	0.076	6.6853	10.067	0.51228	0.5556	0.1991	0.0023	-0.14205	0.0093	0.0632	0.2542	0.2979	0.114	0.7344	1.0733	0.3052	0.00945	-0.727
185	0.925	0.02755	0.168775	0.014181	0.119746	0.93354	0.01488	0.0769	6.7105	10.115	0.51257	0.5687	0.2069	0.0111	-0.13785	0.0153	0.0739	0.2609	0.3043	0.1273	0.7424	1.0843	0.3081	0.01445	-0.7188
186	0.93	0.02822	0.169065	0.014244	0.120074	0.933718	0.015026	0.07782	6.7378	10.166	0.51289	0.5827	0.2163	0.019	-0.13325	0.0211	0.0845	0.2681	0.311	0.1416	0.7514	1.0981	0.3113	0.02	-0.7098
187	0.935	0.0289	0.169375	0.014311	0.120385	0.933908	0.015188	0.07877	6.766	10.221	0.513225	0.5983	0.2255	0.0278	-0.1278	0.0268	0.095	0.2755	0.3184	0.1577	0.7609	1.1109	0.3147	0.02525	-0.7005
188	0.94	0.02966	0.1697	0.014382	0.120703	0.934122	0.015337	0.07976	6.7955	10.2805	0.513545	0.614	0.2349	0.0363	-0.1226	0.0334	0.107	0.2839	0.327	0.1718	0.7713	1.1258	0.3185	0.0308	-0.691
189	0.945	0.03045	0.17004	0.014453	0.121051	0.934335	0.01551	0.08091	6.8281	10.343	0.51392	0.6322	0.2457	0.0447	-0.1171	0.0403	0.1197	0.2929	0.3361	0.1882	0.7819	1.1427	0.3224	0.03755	-0.6802
190	0.95	0.03133	0.17042	0.014536	0.121435	0.93457	0.015699	0.08214	6.8627	10.4115	0.5143	0.6522	0.2574	0.0534	-0.1109	0.0479	0.1321	0.3026	0.3452	0.2066	0.7931	1.1645	0.3269	0.0438	-0.6685
191	0.955	0.03221	0.170845	0.014623	0.121846	0.934827	0.015903	0.08348	6.9009	10.4825	0.51476	0.6748	0.2719	0.0622	-0.10455	0.0562	0.147	0.3123	0.356	0.2254	0.8037	1.1949	0.3317	0.0517	-0.6536
192	0.96	0.03319	0.171305	0.014733	0.1223	0.935097	0.016154	0.08495	6.9414	10.568	0.51525	0.7	0.2868	0.0722	-0.097	0.0655	0.1622	0.3234	0.3669	0.248	0.8162	1.2338	0.3367	0.06045	-0.6381
193	0.965	0.03434	0.17178	0.014852	0.12279	0.935413	0.016426	0.08656	6.9865	10.671	0.51585	0.73	0.3023	0.083	-0.0899	0.0752	0.1788	0.3353	0.3805	0.2762	0.8292	1.2663	0.3419	0.0696	-0.6228
194	0.97	0.03574	0.1723	0.014979	0.123385	0.935753	0.016731	0.08826	7.039	10.788	0.516515	0.7688	0.3177	0.0953	-0.0823	0.0849	0.1965	0.3489	0.3956	0.3061	0.8439	1.2883	0.3487	0.0804	-0.6052
195	0.975	0.03743	0.17297	0.015109	0.124089	0.936132	0.017075	0.09013	7.1059	10.9215	0.51725	0.8115	0.3374	0.1094	-0.0736	0.096	0.2164	0.3632	0.4126	0.336	0.8595	1.3082	0.356	0.09135	-0.5806
196	0.98	0.03933	0.173715	0.015262	0.124909	0.936631	0.017455	0.09254	7.1934	11.091	0.518135	0.8583	0.3616	0.1274	-0.06365	0.1094	0.2422	0.3804	0.4328	0.3715	0.8795	1.3323	0.3647	0.1038	-0.5549
197	0.985	0.04174	0.174745	0.015462	0.12583	0.937243	0.017951	0.09558	7.293	11.3015	0.519225	0.9176	0.3961	0.1508	-0.04935	0.1282	0.2737	0.4036	0.454	0.4131	0.9039	1.3651	0.3748	0.12315	-0.5223
198	0.99	0.04485	0.17608	0.015728	0.127109	0.937975	0.018688	0.09965	7.4542	11.5575	0.520575	1.0166	0.441	0.1713	-0.0324	0.1546	0.3246	0.4318	0.4783	0.4631	0.9396	1.4016	0.3872	0.14565	-0.4733
199	0.995	0.04967	0.178335	0.016181	0.129222	0.939181	0.019967	0.10621	7.7132	11.892	0.52278	1.1972	0.5066	0.2015	-0.0062	0.2049	0.4313	0.4815	0.5148	0.5615	0.9942	1.4437	0.4069	0.1748	-0.3658
200	1	0	0	0	0	0	0	0	0	0	0	0	0	0	0	0	0	0	0	0	0	0	0	0	0
201	1.005	0	0	0	0	0	0	0	0	0	0	0	0	0	0	0	0	0	0	0	0	0	0	0	0
