# Supplementary material for: Time-varying asymmetry and tail thickness in long series of daily financial returns
Source: publisher site journal article supplement (doi:10.1515/snde-2017-0071), 2018-10-02
Supplement: Supplementary file 361 [file mq_add.xlsx]

## Sheet: 1
	quantile	(a1+a2)/2+b1	a0/[1-(a1+a2)/2-b1]	[a0/(1-(a1+a2)/2-b1)]^0.5	alpha1/alpha2	ni2/ni1	per_1	per_2	per_3	per_4	per_5	per_6
1	0.005	0.97718	0.5982	0.77346	5.45	0.9382	36.576	23.372	12.8001	33.545	7.8831	5.6668
2	0.01	0.978024	0.6148	0.7841	5.83	0.9757	37.01	24.033	12.8832	34.098	7.9282	5.692
3	0.015	0.978531	0.62405	0.78997	6.07	0.9988	37.3155	24.412	12.9301	34.466	7.962	5.7071
4	0.02	0.978916	0.63025	0.79389	6.24	1.0184	37.57	24.663	12.9664	34.7235	7.9877	5.7178
5	0.025	0.979201	0.6355	0.79719	6.38	1.0336	37.816	24.888	12.9932	34.9615	8.0087	5.7275
6	0.03	0.979442	0.63995	0.79998	6.51	1.0475	37.968	25.084	13.0161	35.1715	8.0247	5.736
7	0.035	0.97964	0.6439	0.80246	6.62	1.059	38.1075	25.288	13.0333	35.372	8.0394	5.7434
8	0.04	0.979832	0.64795	0.80495	6.72	1.0695	38.234	25.464	13.0509	35.5465	8.0517	5.7499
9	0.045	0.980008	0.65115	0.80695	6.82	1.0788	38.3235	25.646	13.0685	35.6785	8.0621	5.7556
10	0.05	0.980156	0.65405	0.80874	6.91	1.088	38.4065	25.83	13.0825	35.7905	8.0716	5.7608
11	0.055	0.980292	0.65685	0.81048	7	1.0965	38.475	25.998	13.0936	35.8995	8.0798	5.7657
12	0.06	0.980415	0.6595	0.8121	7.07	1.1046	38.536	26.151	13.1058	35.996	8.088	5.7703
13	0.065	0.980523	0.6618	0.81353	7.16	1.1124	38.595	26.301	13.1169	36.076	8.0956	5.7745
14	0.07	0.980632	0.66405	0.81489	7.22	1.1193	38.645	26.431	13.1287	36.156	8.1023	5.7789
15	0.075	0.980731	0.6661	0.81616	7.3	1.1258	38.6935	26.561	13.139	36.225	8.1089	5.7835
16	0.08	0.980839	0.66815	0.81743	7.37	1.1317	38.744	26.675	13.1478	36.2895	8.1159	5.7875
17	0.085	0.980934	0.67005	0.81857	7.43	1.1379	38.7915	26.789	13.1578	36.3585	8.1223	5.7913
18	0.09	0.981024	0.67185	0.81969	7.49	1.1437	38.837	26.909	13.1661	36.426	8.1278	5.7957
19	0.095	0.981105	0.6735	0.82069	7.55	1.1492	38.88	27.02	13.1745	36.496	8.1332	5.7996
20	0.1	0.981181	0.67505	0.82162	7.61	1.1544	38.92	27.124	13.182	36.563	8.1385	5.8036
21	0.105	0.981257	0.67665	0.82261	7.67	1.1595	38.9605	27.227	13.19	36.6335	8.1437	5.8078
22	0.11	0.981331	0.6784	0.82367	7.72	1.1647	39.0015	27.338	13.1973	36.699	8.1486	5.8117
23	0.115	0.981405	0.6799	0.82458	7.79	1.17	39.038	27.439	13.2049	36.7605	8.1537	5.816
24	0.12	0.981475	0.6814	0.82548	7.84	1.1751	39.073	27.533	13.2124	36.821	8.1584	5.8201
25	0.125	0.981548	0.6829	0.82639	7.9	1.1805	39.107	27.632	13.2195	36.884	8.163	5.8244
26	0.13	0.981616	0.68455	0.82738	7.96	1.1854	39.1435	27.727	13.2259	36.9465	8.1676	5.8291
27	0.135	0.981679	0.6861	0.82832	8.01	1.1903	39.178	27.828	13.2327	37.004	8.1719	5.8336
28	0.14	0.981737	0.6875	0.82916	8.06	1.1951	39.2105	27.915	13.2391	37.057	8.176	5.8384
29	0.145	0.981797	0.68905	0.83009	8.11	1.2002	39.2435	28.01	13.2452	37.113	8.1801	5.843
30	0.15	0.981855	0.6905	0.83097	8.16	1.205	39.274	28.099	13.2516	37.1655	8.1842	5.8479
31	0.155	0.981913	0.69195	0.83184	8.21	1.2097	39.305	28.188	13.2575	37.218	8.1883	5.8529
32	0.16	0.981971	0.69325	0.83262	8.26	1.2144	39.333	28.269	13.263	37.271	8.1925	5.858
33	0.165	0.982024	0.69455	0.8334	8.31	1.2191	39.3615	28.347	13.2684	37.322	8.1965	5.8645
34	0.17	0.98208	0.6959	0.83423	8.35	1.2236	39.3865	28.425	13.2736	37.3745	8.2003	5.8716
35	0.175	0.982134	0.6972	0.835	8.4	1.2279	39.411	28.499	13.279	37.429	8.2042	5.8792
36	0.18	0.982185	0.69855	0.83581	8.45	1.232	39.4355	28.576	13.2844	37.4845	8.208	5.8871
37	0.185	0.982234	0.6999	0.83661	8.5	1.236	39.459	28.656	13.2899	37.5385	8.2115	5.8974
38	0.19	0.982287	0.7012	0.83738	8.54	1.2401	39.482	28.732	13.2952	37.588	8.2151	5.9107
39	0.195	0.982337	0.70235	0.83808	8.59	1.244	39.5055	28.806	13.3003	37.64	8.2188	5.9278
40	0.2	0.982387	0.7037	0.83887	8.64	1.2478	39.5295	28.883	13.3054	37.7	8.2224	5.9621
41	0.205	0.982439	0.70495	0.83963	8.69	1.2519	39.552	28.957	13.3108	37.7555	8.2257	7.1312
42	0.21	0.98249	0.7062	0.84036	8.73	1.256	39.5715	29.026	13.3156	37.815	8.2293	7.2144
43	0.215	0.98254	0.70745	0.8411	8.78	1.2599	39.5905	29.093	13.3202	37.8685	8.2326	7.2585
44	0.22	0.982587	0.70865	0.84183	8.82	1.2638	39.6095	29.156	13.3251	37.918	8.2361	7.2861
45	0.225	0.982637	0.7099	0.84258	8.87	1.2675	39.629	29.22	13.3295	37.966	8.2394	7.305
46	0.23	0.982686	0.7111	0.84328	8.91	1.2712	39.649	29.286	13.3342	38.013	8.2427	7.3197
47	0.235	0.982735	0.7123	0.84398	8.96	1.2749	39.6695	29.353	13.3388	38.053	8.246	7.3329
48	0.24	0.982782	0.71345	0.84466	9	1.2785	39.691	29.411	13.3432	38.0925	8.2493	7.3447
49	0.245	0.982824	0.71465	0.84537	9.04	1.2824	39.711	29.464	13.3478	38.131	8.2527	7.3552
50	0.25	0.982867	0.7159	0.84611	9.09	1.2861	39.733	29.518	13.3523	38.1675	8.2561	7.3642
51	0.255	0.982912	0.71705	0.84679	9.13	1.2896	39.7575	29.576	13.3567	38.2075	8.2597	7.3732
52	0.26	0.982952	0.7182	0.84749	9.17	1.2933	39.7785	29.631	13.3607	38.247	8.263	7.3813
53	0.265	0.982991	0.7193	0.84812	9.22	1.2971	39.798	29.687	13.3647	38.284	8.2663	7.3891
54	0.27	0.983035	0.72035	0.84875	9.26	1.3009	39.8185	29.736	13.3688	38.323	8.2697	7.3968
55	0.275	0.983077	0.7215	0.84943	9.31	1.3046	39.8375	29.793	13.3729	38.3545	8.2728	7.4035
56	0.28	0.983117	0.72265	0.85011	9.35	1.3083	39.8555	29.846	13.377	38.386	8.2763	7.4102
57	0.285	0.98316	0.72375	0.85073	9.39	1.312	39.871	29.901	13.3811	38.4205	8.28	7.417
58	0.29	0.983201	0.72485	0.8514	9.44	1.3156	39.889	29.95	13.3852	38.456	8.2834	7.4232
59	0.295	0.983242	0.72605	0.85209	9.48	1.3191	39.908	30.003	13.389	38.4875	8.2866	7.4296
60	0.3	0.983282	0.7272	0.85276	9.53	1.3227	39.9245	30.06	13.3934	38.518	8.2903	7.4357
61	0.305	0.98332	0.72825	0.85337	9.57	1.3258	39.942	30.112	13.3973	38.547	8.2938	7.4415
62	0.31	0.983358	0.72935	0.85403	9.62	1.3298	39.958	30.166	13.4012	38.579	8.2977	7.4471
63	0.315	0.983393	0.7305	0.8547	9.66	1.3334	39.9755	30.219	13.4051	38.61	8.3013	7.4526
64	0.32	0.983434	0.73165	0.85536	9.7	1.3368	39.99	30.276	13.4087	38.6425	8.305	7.4584
65	0.325	0.983475	0.73265	0.85596	9.75	1.3402	40.0065	30.331	13.413	38.674	8.3085	7.4639
66	0.33	0.983513	0.7337	0.85656	9.79	1.3438	40.022	30.381	13.4167	38.701	8.312	7.4693
67	0.335	0.983551	0.73485	0.85723	9.83	1.3472	40.037	30.433	13.4209	38.73	8.3158	7.4744
68	0.34	0.983589	0.7359	0.85785	9.88	1.3508	40.0525	30.481	13.4247	38.7565	8.3197	7.4795
69	0.345	0.983624	0.7369	0.85845	9.93	1.3543	40.0685	30.533	13.4287	38.7845	8.3232	7.4848
70	0.35	0.983662	0.73805	0.85911	9.97	1.3578	40.0845	30.585	13.4326	38.813	8.327	7.4895
71	0.355	0.983698	0.739	0.85966	10.02	1.3616	40.1	30.63	13.4366	38.8395	8.3308	7.4942
72	0.36	0.983736	0.74005	0.86028	10.07	1.3648	40.114	30.678	13.4404	38.8675	8.3346	7.499
73	0.365	0.983773	0.74115	0.86092	10.11	1.3686	40.128	30.724	13.4444	38.895	8.3387	7.5037
74	0.37	0.983812	0.7422	0.86152	10.16	1.3722	40.1445	30.766	13.4482	38.9205	8.3429	7.5082
75	0.375	0.983847	0.74325	0.86212	10.21	1.3756	40.1615	30.81	13.452	38.9495	8.3469	7.5126
76	0.38	0.983881	0.7443	0.86275	10.25	1.3791	40.178	30.849	13.4554	38.977	8.3506	7.5174
77	0.385	0.983916	0.74545	0.8634	10.3	1.3824	40.1945	30.892	13.4593	39.005	8.3544	7.5218
78	0.39	0.983952	0.7465	0.86402	10.35	1.3857	40.21	30.933	13.463	39.0315	8.3581	7.5263
79	0.395	0.98399	0.74755	0.86462	10.4	1.389	40.226	30.974	13.4672	39.056	8.3616	7.5306
80	0.4	0.984022	0.74855	0.86519	10.44	1.3923	40.243	31.017	13.4707	39.0815	8.3656	7.535
81	0.405	0.984059	0.74955	0.86578	10.49	1.3956	40.26	31.059	13.4743	39.1065	8.3693	7.5391
82	0.41	0.984092	0.7507	0.86643	10.54	1.399	40.276	31.101	13.478	39.134	8.3728	7.5436
83	0.415	0.984127	0.75175	0.86705	10.59	1.4021	40.2915	31.141	13.4817	39.158	8.3771	7.5478
84	0.42	0.984163	0.75285	0.86768	10.64	1.4054	40.3075	31.185	13.4856	39.1855	8.3808	7.5521
85	0.425	0.984199	0.7539	0.8683	10.69	1.4087	40.3235	31.227	13.4894	39.2105	8.3846	7.556
86	0.43	0.984234	0.755	0.86893	10.74	1.4118	40.3385	31.27	13.4932	39.2345	8.3885	7.56
87	0.435	0.984269	0.7561	0.86954	10.79	1.4152	40.352	31.313	13.4967	39.2595	8.3924	7.5641
88	0.44	0.984303	0.75715	0.87015	10.84	1.4187	40.367	31.358	13.5004	39.284	8.3963	7.5685
89	0.445	0.984335	0.75825	0.87078	10.9	1.4221	40.381	31.397	13.5041	39.307	8.3998	7.5724
90	0.45	0.98437	0.7593	0.87138	10.95	1.4256	40.395	31.44	13.5079	39.332	8.4035	7.5767
91	0.455	0.984405	0.7604	0.87202	11	1.429	40.4085	31.481	13.5116	39.3575	8.4071	7.5806
92	0.46	0.984438	0.76155	0.87268	11.05	1.432	40.4215	31.526	13.5151	39.3835	8.4108	7.5848
93	0.465	0.984473	0.76265	0.8733	11.1	1.4355	40.4355	31.568	13.5188	39.4115	8.4145	7.5889
94	0.47	0.984507	0.7637	0.87392	11.15	1.4387	40.45	31.612	13.5225	39.436	8.4182	7.593
95	0.475	0.984546	0.76475	0.8745	11.2	1.4419	40.466	31.655	13.5259	39.4625	8.4223	7.5971
96	0.48	0.984582	0.76575	0.87509	11.25	1.4451	40.48	31.694	13.5293	39.493	8.4259	7.6014
97	0.485	0.984617	0.7668	0.87569	11.31	1.4485	40.4925	31.739	13.5329	39.521	8.4296	7.6054
98	0.49	0.984649	0.7679	0.87631	11.36	1.4517	40.506	31.783	13.5366	39.549	8.4333	7.6098
99	0.495	0.984682	0.76905	0.87698	11.42	1.4549	40.518	31.829	13.5406	39.5755	8.4372	7.614
100	0.5	0.984716	0.7702	0.87763	11.47	1.4579	40.5305	31.876	13.5443	39.5975	8.441	7.6182
101	0.505	0.984747	0.77135	0.87828	11.53	1.4613	40.5445	31.921	13.548	39.6185	8.4447	7.6223
102	0.51	0.984783	0.7725	0.87894	11.59	1.4644	40.5585	31.966	13.5516	39.6415	8.4482	7.6265
103	0.515	0.984818	0.77365	0.87958	11.64	1.4674	40.572	32.008	13.5552	39.6655	8.4519	7.6309
104	0.52	0.984853	0.7748	0.88025	11.7	1.4709	40.583	32.049	13.5587	39.6905	8.4556	7.6352
105	0.525	0.984886	0.77595	0.88088	11.76	1.4742	40.5945	32.095	13.5622	39.713	8.4592	7.6395
106	0.53	0.984919	0.77705	0.88152	11.82	1.4775	40.606	32.14	13.5657	39.738	8.4628	7.6439
107	0.535	0.984954	0.7782	0.88217	11.88	1.4806	40.6165	32.178	13.5694	39.761	8.4665	7.6481
108	0.54	0.984988	0.77925	0.88277	11.94	1.4837	40.6265	32.217	13.5732	39.785	8.4704	7.6527
109	0.545	0.985023	0.7805	0.88347	12	1.487	40.636	32.255	13.5767	39.8065	8.4739	7.6573
110	0.55	0.98506	0.78165	0.88411	12.07	1.4906	40.6455	32.292	13.5805	39.83	8.4777	7.6618
111	0.555	0.985097	0.7828	0.88476	12.13	1.4939	40.655	32.33	13.5843	39.8555	8.4811	7.6661
112	0.56	0.985133	0.78395	0.88542	12.19	1.4973	40.6645	32.366	13.5881	39.8805	8.4846	7.6706
113	0.565	0.98517	0.7852	0.88614	12.26	1.5006	40.6745	32.405	13.5917	39.9085	8.4879	7.6752
114	0.57	0.985208	0.78635	0.88678	12.32	1.5041	40.6845	32.442	13.5955	39.9375	8.4914	7.6795
115	0.575	0.985243	0.7876	0.88748	12.39	1.5076	40.6945	32.48	13.5991	39.964	8.4949	7.6843
116	0.58	0.985282	0.78885	0.88817	12.46	1.5112	40.705	32.52	13.6027	39.9865	8.4983	7.6892
117	0.585	0.985315	0.79005	0.88885	12.53	1.5144	40.7145	32.559	13.6066	40.0095	8.5017	7.6937
118	0.59	0.985351	0.7913	0.88955	12.6	1.518	40.7245	32.6	13.6104	40.0345	8.5054	7.6984
119	0.595	0.985387	0.79255	0.89026	12.67	1.5212	40.735	32.639	13.6144	40.0555	8.5089	7.7034
120	0.6	0.985422	0.7939	0.89101	12.75	1.5248	40.746	32.681	13.6181	40.0745	8.5125	7.7082
121	0.605	0.985458	0.79505	0.89166	12.82	1.5283	40.7565	32.717	13.6219	40.097	8.516	7.713
122	0.61	0.985492	0.79625	0.89234	12.89	1.5318	40.7655	32.759	13.626	40.118	8.5194	7.7179
123	0.615	0.985527	0.79755	0.89307	12.96	1.5355	40.776	32.794	13.6298	40.1435	8.5229	7.7231
124	0.62	0.985563	0.79885	0.89379	13.04	1.5388	40.786	32.831	13.6339	40.169	8.5265	7.728
125	0.625	0.985601	0.80015	0.89451	13.11	1.5421	40.7965	32.865	13.6381	40.1945	8.5299	7.7329
126	0.63	0.985639	0.80135	0.89519	13.19	1.5456	40.806	32.9	13.6421	40.2195	8.5334	7.738
127	0.635	0.985677	0.8026	0.8959	13.27	1.5491	40.815	32.935	13.6461	40.2435	8.5367	7.7432
128	0.64	0.985714	0.804	0.89668	13.35	1.5526	40.824	32.97	13.6501	40.2705	8.5401	7.748
129	0.645	0.985751	0.80535	0.89741	13.43	1.556	40.833	33.008	13.654	40.296	8.5434	7.7529
130	0.65	0.985787	0.80665	0.89814	13.52	1.5595	40.844	33.042	13.6582	40.321	8.5466	7.7575
131	0.655	0.985824	0.8079	0.89885	13.61	1.563	40.8545	33.078	13.6623	40.346	8.5499	7.7628
132	0.66	0.985859	0.8093	0.89961	13.7	1.5667	40.8635	33.112	13.6664	40.3715	8.5535	7.7678
133	0.665	0.985894	0.8106	0.90034	13.8	1.5701	40.8735	33.151	13.6704	40.405	8.5571	7.7735
134	0.67	0.985929	0.812	0.90111	13.89	1.5738	40.8825	33.193	13.6745	40.4315	8.5606	7.7786
135	0.675	0.985965	0.81335	0.90187	13.99	1.5772	40.893	33.232	13.6786	40.4555	8.5639	7.7835
136	0.68	0.986002	0.81485	0.90269	14.08	1.5811	40.903	33.27	13.6825	40.476	8.5673	7.7886
137	0.685	0.986038	0.81635	0.90354	14.18	1.5846	40.9125	33.311	13.6868	40.495	8.5709	7.794
138	0.69	0.986076	0.81775	0.90431	14.28	1.5883	40.921	33.353	13.6909	40.5165	8.5742	7.7993
139	0.695	0.986114	0.8193	0.90515	14.39	1.5922	40.93	33.394	13.6952	40.5405	8.5778	7.8047
140	0.7	0.986153	0.82085	0.906	14.5	1.5962	40.939	33.435	13.6995	40.5615	8.5811	7.8098
141	0.705	0.986194	0.8223	0.90683	14.61	1.6	40.9485	33.473	13.7039	40.58	8.5848	7.8145
142	0.71	0.986233	0.82385	0.90768	14.74	1.604	40.959	33.515	13.7083	40.6015	8.5882	7.8192
143	0.715	0.986269	0.82535	0.90849	14.86	1.608	40.968	33.553	13.7125	40.6255	8.5918	7.8241
144	0.72	0.986307	0.8269	0.90935	14.99	1.6124	40.977	33.595	13.717	40.6485	8.5954	7.8292
145	0.725	0.986347	0.82845	0.9102	15.12	1.6163	40.985	33.635	13.7215	40.6715	8.5988	7.8343
146	0.73	0.986387	0.83	0.91104	15.25	1.6201	40.993	33.679	13.7259	40.6955	8.6024	7.8393
147	0.735	0.98643	0.83155	0.91189	15.38	1.6242	41.002	33.727	13.7303	40.7235	8.6059	7.8444
148	0.74	0.986468	0.83315	0.91278	15.52	1.6286	41.011	33.771	13.7351	40.748	8.6094	7.8496
149	0.745	0.986512	0.83485	0.9137	15.67	1.6327	41.019	33.817	13.7401	40.7675	8.6129	7.8546
150	0.75	0.986554	0.83655	0.91463	15.82	1.6368	41.0275	33.861	13.7443	40.7875	8.6166	7.8594
151	0.755	0.986596	0.83815	0.91551	15.98	1.6409	41.037	33.91	13.749	40.8055	8.6201	7.8642
152	0.76	0.986636	0.84	0.91652	16.16	1.6453	41.045	33.96	13.7539	40.829	8.624	7.8691
153	0.765	0.98668	0.8418	0.91751	16.33	1.6495	41.0535	34.009	13.7584	40.8515	8.6276	7.8737
154	0.77	0.986725	0.84365	0.9185	16.53	1.6542	41.0605	34.065	13.7633	40.873	8.6312	7.8783
155	0.775	0.986768	0.8455	0.91951	16.74	1.659	41.068	34.115	13.7685	40.8945	8.6348	7.8824
156	0.78	0.986813	0.8474	0.92054	16.93	1.6638	41.0765	34.165	13.774	40.917	8.6383	7.887
157	0.785	0.986858	0.84935	0.92162	17.14	1.6688	41.0855	34.212	13.7791	40.9445	8.6419	7.8916
158	0.79	0.986905	0.8513	0.92267	17.35	1.6735	41.096	34.26	13.7846	40.9705	8.6459	7.8962
159	0.795	0.986952	0.85345	0.92382	17.57	1.6783	41.1055	34.313	13.7901	40.992	8.6499	7.901
160	0.8	0.986997	0.85555	0.92496	17.79	1.6833	41.114	34.363	13.7956	41.009	8.6539	7.9054
161	0.805	0.987042	0.8576	0.92608	18.01	1.6885	41.122	34.408	13.801	41.024	8.658	7.9098
162	0.81	0.987089	0.85985	0.92728	18.26	1.6936	41.1305	34.459	13.8072	41.038	8.6623	7.9144
163	0.815	0.987137	0.86195	0.92841	18.53	1.6988	41.1395	34.503	13.8132	41.054	8.6663	7.919
164	0.82	0.987187	0.8643	0.92969	18.81	1.7048	41.1485	34.546	13.8192	41.0695	8.6706	7.9236
165	0.825	0.987235	0.8667	0.93097	19.12	1.7105	41.1585	34.59	13.8257	41.0895	8.6748	7.9279
166	0.83	0.987285	0.8691	0.93227	19.41	1.7168	41.169	34.639	13.8318	41.1065	8.679	7.9324
167	0.835	0.987339	0.87145	0.93352	19.7	1.7228	41.178	34.691	13.8382	41.125	8.6832	7.9371
168	0.84	0.987387	0.8739	0.93484	20.01	1.7292	41.1865	34.739	13.8442	41.141	8.6878	7.9417
169	0.845	0.98744	0.8767	0.93633	20.33	1.7351	41.196	34.793	13.8508	41.155	8.6924	7.9457
170	0.85	0.987493	0.87945	0.93779	20.67	1.7412	41.206	34.849	13.8574	41.1685	8.6976	7.9503
171	0.855	0.987548	0.8821	0.93921	21.02	1.7471	41.215	34.909	13.864	41.181	8.7023	7.9555
172	0.86	0.987602	0.885	0.94074	21.39	1.7534	41.224	34.968	13.8712	41.194	8.7075	7.9606
173	0.865	0.98766	0.88765	0.94216	21.77	1.76	41.2325	35.032	13.8783	41.2065	8.7122	7.9656
174	0.87	0.987719	0.8907	0.94378	22.18	1.767	41.241	35.094	13.8859	41.2175	8.7174	7.9703
175	0.875	0.987781	0.894	0.94552	22.6	1.774	41.2485	35.159	13.8937	41.2275	8.7228	7.975
176	0.88	0.987842	0.89725	0.94724	23.05	1.7809	41.255	35.221	13.9015	41.237	8.7283	7.9804
177	0.885	0.987908	0.9008	0.94912	23.54	1.7881	41.262	35.296	13.909	41.2465	8.7342	7.9853
178	0.89	0.987978	0.90465	0.95114	24.07	1.7952	41.2695	35.365	13.9175	41.2575	8.7406	7.9901
179	0.895	0.988042	0.9088	0.95332	24.63	1.8024	41.276	35.434	13.9264	41.2675	8.7471	7.9956
180	0.9	0.988113	0.9129	0.95546	25.19	1.8097	41.285	35.507	13.9347	41.2775	8.7533	8.0002
181	0.905	0.988188	0.9174	0.95782	25.75	1.8178	41.2945	35.587	13.9447	41.2885	8.7597	8.0059
182	0.91	0.988273	0.922	0.96022	26.36	1.8268	41.3065	35.663	13.9541	41.2985	8.7668	8.0112
183	0.915	0.988363	0.92695	0.96279	27.08	1.8365	41.3155	35.735	13.964	41.308	8.7744	8.0169
184	0.92	0.98846	0.9322	0.96551	27.94	1.8467	41.3235	35.82	13.9739	41.318	8.7818	8.0231
185	0.925	0.988545	0.9375	0.96824	28.87	1.8585	41.332	35.909	13.9845	41.3265	8.7902	8.0295
186	0.93	0.988653	0.94335	0.97127	29.95	1.8707	41.34	35.977	13.9958	41.3365	8.7996	8.0355
187	0.935	0.98876	0.94925	0.9743	31.14	1.8838	41.349	36.056	14.0074	41.348	8.8087	8.0423
188	0.94	0.988873	0.9561	0.97782	32.59	1.8978	41.357	36.138	14.0205	41.3625	8.8194	8.0492
189	0.945	0.988995	0.963	0.98133	34.69	1.9143	41.368	36.228	14.034	41.3765	8.8304	8.0566
190	0.95	0.989112	0.9707	0.98526	36.86	1.933	41.3765	36.328	14.0488	41.3865	8.8433	8.0648
191	0.955	0.989236	0.97975	0.98982	39.8	1.9517	41.3845	36.438	14.0654	41.4015	8.8586	8.074
192	0.96	0.989383	0.99005	0.99502	44.16	1.9726	41.393	36.549	14.0842	41.4145	8.8761	8.084
193	0.965	0.989551	1.00175	1.00087	52.57	1.9948	41.4025	36.662	14.1038	41.4285	8.8949	8.0954
194	0.97	0.989737	1.0155	1.00772	64.27	2.0183	41.416	36.795	14.1237	41.4395	8.9149	8.1082
195	0.975	0.989924	1.03095	1.01538	74.06	2.0464	41.4345	36.932	14.1454	41.448	8.9421	8.1238
196	0.98	0.990152	1.0519	1.02563	82.41	2.085	41.4475	37.083	14.1752	41.4555	8.9782	8.1415
197	0.985	0.990412	1.07725	1.03792	93	2.1345	41.4585	37.238	14.2108	41.4605	9.052	8.1628
198	0.99	0.990777	1.11565	1.05625	107.24	2.1894	41.474	37.48	14.2578	41.466	10.6755	8.1913
199	0.995	0.991403	1.16895	1.08118	135.12	2.2738	41.485	37.973	14.3311	41.474	11.1153	8.2359
200	1	0	0	0	0	0	0	0	0	0	0	0
201	1.005	0	0	0	0	0	0	0	0	0	0	0
