# Supplementary material for: Time-varying asymmetry and tail thickness in long series of daily financial returns
Source: publisher site journal article supplement (doi:10.1515/snde-2017-0071), 2018-10-02
Supplement: Supplementary file 363 [file point_est.xlsx]

## Sheet: 1
	log post kernel	delta	rho	alpha0	alpha1-	beta1	alpha1+	lambda1	ni1	ni2	a00	h0	gamma_s0	gamma_s1	gamma_s2	gamma_s3	gamma_s4	gamma_s5	gamma_s6	gamma_s7	gamma_s8	gamma_c0	gamma_c1	gamma_c2	gamma_c3
1	-16511.9	0.00227102	0.317986	-4.38136	-2.10138	2.50242	-4.60301	0.0388875	1.29497	1.78531	0.00045443	-1.55851	-0.121031	-0.301225	-0.366344	-0.397152	-0.488313	0.0065013	-0.116422	-0.28725	0.615397	0.71227	0.218877	-0.105988	-0.946924
2	-16536.7	0.00464028	0.315633	-4.351	-2.10841	2.51637	-4.757	0.0367824	1.34028	1.79097	0.00196256	-2.32582	-0.152033	-0.576946	-0.377827	-0.0935313	-0.545353	0.0357087	0.20725	-0.277334	0.700144	0.994736	0.00469115	-0.0881054	-1.1475
3	-16520.1	0.00265831	0.317997	-4.44421	-2.10898	2.52601	-4.77851	0.0386589	1.33166	1.8579	-0.00069246	-1.68583	-0.0608695	-0.370403	-0.286816	-0.296872	-0.302669	-0.00205154	-0.0367051	-0.301356	0.307967	0.772021	0.0973209	-0.16404	-1.0049
