# Supplementary material for: Time-varying asymmetry and tail thickness in long series of daily financial returns
Source: publisher site journal article supplement (doi:10.1515/snde-2017-0071), 2018-10-02
Supplement: Supplementary file 365 [file post_es.xlsx]

## Sheet: 1
	delta	rho	alpha0	alpha1-	beta1	alpha1+	lambda1	ni1	ni2	a00	h0	gamma_s0	gamma_s1	gamma_s2	gamma_s3	gamma_s4	gamma_s5	gamma_s6	gamma_s7	gamma_s8	gamma_c0	gamma_c1	gamma_c2	gamma_c3	gamma_c4
1	0.00265831	0.157662	0.0118519	0.108459	0.925757	0.00938784	0.0386589	5.83231	8.49622	0.49978	0.255633	-0.0608695	-0.370403	-0.286816	-0.296872	-0.302669	-0.00205154	-0.0367051	-0.301356	0.307967	0.772021	0.0973209	-0.16404	-1.0049	0.375759
2	0.0174215	0.00779887	0.00157965	0.00757813	0.00551587	0.00385814	0.0269156	0.586923	1.06813	0.0088579	0.209528	0.174145	0.245625	0.0946203	0.235211	0.238141	0.189157	0.261921	0.283225	0.348372	0.207783	0.189152	0.114891	0.188867	0.316385
