# Supplementary material for: Time-varying asymmetry and tail thickness in long series of daily financial returns
Source: publisher site journal article supplement (doi:10.1515/snde-2017-0071), 2018-10-02
Supplement: Supplementary file 375 [file r_1.xlsx]

## Sheet: 1
	Var1	Var2	Var3	Var4	Var5
1	0	0.601504	0.143215	0.0877193	0.0859291
2	0	0.143985	0.144035	0.14411	0.144185
3	0	18	10	7	6
4	0.14397	0.144	0.14407	0.14415	0.14422
