# Supplementary material for: Time-varying asymmetry and tail thickness in long series of daily financial returns
Source: publisher site journal article supplement (doi:10.1515/snde-2017-0071), 2018-10-02
Supplement: Supplementary file 379 [file thres_inm.xlsx]

## Sheet: 1
	Var1	Var2	Var3	Var4	Var5	Var6	Var7	Var8	Var9	Var10	Var11	Var12	Var13	Var14	Var15	Var16	Var17	Var18	Var19	Var20	Var21	Var22	Var23	Var24	Var25
1	0	0	0	0	0	0	0	0	0	0	0	0	0	0	0	0	0	0	0	0	0	0	0	0	0
2	0.05	-0.0497	0.1	-0.02416	0.25	0.01646	0.5	0.07224	0.75	0.16504	0.9	0.25557	0.95	#N/A	111	0.05848	4.72493	30	0.29403	0	0.437574	0	0	0	0
3	0.05	-0.0898	0.1	-0.04895	0.25	0.03435	0.5	0.13815	0.75	0.28805	0.9	0.4217	0.95	#N/A	111	0.08225	2.73144	30	0.041825	0.166025	0	0	0	0	0
4	0.05	-0.1084	0.1	-0.06045	0.25	0.04105	0.5	0.1732	0.75	0.3531	0.9	0.5092	0.95	#N/A	111	0.10025	2.22414	30	0.062825	0.220475	0	0	0	0	0
5	0.05	-0.07645	0.1	-0.0427	0.25	0.027	0.5	0.123	0.75	0.27225	0.9	0.4193	0.95	#N/A	111	0.09845	2.86132	30	-0.0057	0.0216	0.0384	0.1261	0	0.595747	0
6	0.05	-0.05826	0.1	-0.03265	0.25	0.02155	0.5	0.09769	0.75	0.21388	0.9	0.33089	0.95	#N/A	111	0.07165	3.63697	30	-0.007605	0.014725	0.038595	0.106245	0	0.491279	0
7	0.05	-0.05874	0.1	-0.03206	0.25	0.02264	0.5	0.09943	0.75	0.20781	0.9	0.31713	0.95	#N/A	111	0.08601	3.5389	30	-0.00621	0.01023	0.03891	0.11271	0	0.514544	0
8	0.05	-0.0698	0.1	-0.0368	0.25	0.02625	0.5	0.1079	0.75	0.2327	0.9	0.3469	0.95	#N/A	111	0.0737	3.27822	30	0.03325	0.12915	0	0	0	0	0
9	0.05	-0.09135	0.1	-0.04645	0.25	0.03235	0.5	0.1274	0.75	0.2496	0.9	0.368	0.95	#N/A	111	0.10085	2.86303	30	0.046025	0.156725	0	0	0	0	0
10	0.05	-0.08295	0.1	-0.0443	0.25	0.0291	0.5	0.118	0.75	0.23145	0.9	0.3392	0.95	#N/A	111	0.08895	3.18278	30	0.046275	0.141075	0.162675	0.172725	0	0	0
11	0.05	-0.05605	0.1	-0.0314	0.25	0.02015	0.5	0.0952	0.75	0.213	0.9	0.3225	0.95	#N/A	111	0.0543	3.63422	30	-0.00705	0.01495	0.02705	0.07375	0.07885	0.09975	#N/A
