# Supplementary material for: Time-varying asymmetry and tail thickness in long series of daily financial returns
Source: publisher site journal article supplement (doi:10.1515/snde-2017-0071), 2018-10-02
Supplement: Supplementary file 381 [file thres_ni1.xlsx]

## Sheet: 1
	Var1	Var2	Var3	Var4	Var5	Var6	Var7	Var8	Var9	Var10	Var11	Var12	Var13	Var14	Var15	Var16	Var17	Var18	Var19	Var20	Var21	Var22	Var23	Var24	Var25
1	0	0	0	0	0	0	0	0	0	0	0	0	0	0	0	0	0	0	0	0	0	0	0	0	0
2	0.05	3.0647	0.1	3.1852	0.125	3.23	0.2	3.3519	0.25	3.4239	0.5	3.7928	0.75	4.2582	0.8	4.3813	0.875	4.6248	0.9	4.7314	0.95	5.0704	111	3.5602	0.701451
3	0.05	2.9694	0.1	3.0635	0.125	3.1012	0.2	3.2015	0.25	3.2626	0.5	3.5748	0.75	3.9842	0.8	4.1017	0.875	4.3258	0.9	4.4279	0.95	4.746	111	3.2735	0.837252
4	0.05	2.8753	0.1	2.9539	0.125	2.9852	0.2	3.0668	0.25	3.1192	0.5	3.3716	0.75	3.7113	0.8	3.8076	0.875	4.0031	0.9	4.0966	0.95	4.376	111	3.2488	1.01449
5	0.05	2.7886	0.1	2.8563	0.125	2.8818	0.2	2.9536	0.25	2.9967	0.5	3.202	0.75	3.4684	0.8	3.547	0.875	3.7032	0.9	3.778	0.95	4.0109	111	3.068	1.25024
6	0.05	2.714	0.1	2.7736	0.125	2.7969	0.2	2.859	0.25	2.8954	0.5	3.0641	0.75	3.2795	0.8	3.3432	0.875	3.4739	0.9	3.5354	0.95	3.7063	111	2.9671	1.54115
7	0.05	2.6495	0.1	2.703	0.125	2.725	0.2	2.7816	0.25	2.8152	0.5	2.9646	0.75	3.1509	0.8	3.205	0.875	3.3128	0.9	3.3628	0.95	3.5171	111	2.8942	1.70279
8	0.05	2.5967	0.1	2.6491	0.125	2.6707	0.2	2.7284	0.25	2.7619	0.5	2.9031	0.75	3.0767	0.8	3.1272	0.875	3.2301	0.9	3.2796	0.95	3.4318	111	2.8505	1.84029
9	0.05	2.5628	0.1	2.6231	0.125	2.6453	0.2	2.7016	0.25	2.7354	0.5	2.8816	0.75	3.0568	0.8	3.108	0.875	3.2163	0.9	3.266	0.95	3.4118	111	2.8434	1.75781
10	0.05	2.5615	0.1	2.6258	0.125	2.6502	0.2	2.7101	0.25	2.7438	0.5	2.8999	0.75	3.0851	0.8	3.1366	0.875	3.2457	0.9	3.2946	0.95	3.441	111	2.8297	1.63171
11	0.05	2.5995	0.1	2.6666	0.125	2.6922	0.2	2.7558	0.25	2.7927	0.5	2.9556	0.75	3.1513	0.8	3.2074	0.875	3.317	0.9	3.3671	0.95	3.5163	111	2.8915	1.60721
12	0.05	2.6796	0.1	2.7508	0.125	2.7773	0.2	2.8446	0.25	2.8834	0.5	3.0518	0.75	3.2597	0.8	3.3203	0.875	3.4323	0.9	3.4834	0.95	3.6433	111	3.0072	1.55399
13	0.05	2.8064	0.1	2.8786	0.125	2.9067	0.2	2.9761	0.25	3.0168	0.5	3.1919	0.75	3.4131	0.8	3.4777	0.875	3.5991	0.9	3.6542	0.95	3.8212	111	3.1607	1.49347
14	0.05	2.9605	0.1	3.0388	0.125	3.0686	0.2	3.1431	0.25	3.188	0.5	3.3831	0.75	3.6237	0.8	3.6915	0.875	3.8239	0.9	3.8829	0.95	4.0624	111	3.3106	1.29861
15	0.05	3.1178	0.1	3.2111	0.125	3.2486	0.2	3.338	0.25	3.3883	0.5	3.6172	0.75	3.8928	0.8	3.9696	0.875	4.1244	0.9	4.1913	0.95	4.3943	111	3.506	1.10944
16	0.05	3.2714	0.1	3.3895	0.125	3.4332	0.2	3.5408	0.25	3.6023	0.5	3.8763	0.75	4.2116	0.8	4.3037	0.875	4.4868	0.9	4.57	0.95	4.8259	111	3.7711	0.941255
17	0.05	3.4166	0.1	3.556	0.125	3.6078	0.2	3.7383	0.25	3.8116	0.5	4.1466	0.75	4.5473	0.8	4.6611	0.875	4.8862	0.9	4.9867	0.95	5.3065	111	3.9876	0.762939
18	0.05	3.5427	0.1	3.7025	0.125	3.7634	0.2	3.912	0.25	3.9996	0.5	4.3947	0.75	4.8631	0.8	4.9964	0.875	5.2675	0.9	5.3939	0.95	5.7514	111	4.2872	0.645047
19	0.05	3.6487	0.1	3.8196	0.125	3.8861	0.2	4.0543	0.25	4.1516	0.5	4.5925	0.75	5.117	0.8	5.2671	0.875	5.5801	0.9	5.7206	0.95	6.1513	111	4.4071	0.589436
20	0.05	3.7229	0.1	3.9032	0.125	3.9758	0.2	4.1566	0.25	4.2612	0.5	4.7197	0.75	5.29	0.8	5.449	0.875	5.7867	0.9	5.9436	0.95	6.3991	111	4.5753	0.557252
21	0.05	3.7556	0.1	3.9464	0.125	4.021	0.2	4.2089	0.25	4.3106	0.5	4.7724	0.75	5.3674	0.8	5.5322	0.875	5.8676	0.9	6.0307	0.95	6.5346	111	4.5443	0.55485
22	0.05	3.7444	0.1	3.9463	0.125	4.019	0.2	4.2024	0.25	4.3015	0.5	4.7657	0.75	5.3635	0.8	5.5357	0.875	5.8772	0.9	6.0404	0.95	6.5707	111	4.595	0.562359
23	0.05	3.7097	0.1	3.8978	0.125	3.973	0.2	4.1526	0.25	4.2572	0.5	4.7238	0.75	5.3112	0.8	5.4897	0.875	5.8461	0.9	6.0221	0.95	6.5135	111	4.4856	0.556809
24	0.05	3.6513	0.1	3.8345	0.125	3.909	0.2	4.0881	0.25	4.1905	0.5	4.6586	0.75	5.2428	0.8	5.4138	0.875	5.7727	0.9	5.9464	0.95	6.4173	111	4.4391	0.549544
25	0.05	3.6016	0.1	3.7806	0.125	3.8534	0.2	4.027	0.25	4.1242	0.5	4.5853	0.75	5.1739	0.8	5.342	0.875	5.6813	0.9	5.8427	0.95	6.3166	111	4.3514	0.548706
26	0.05	3.56	0.1	3.7375	0.125	3.8076	0.2	3.9759	0.25	4.0712	0.5	4.5296	0.75	5.1091	0.8	5.2808	0.875	5.6126	0.9	5.7585	0.95	6.2462	111	4.2061	0.552049
27	0.05	3.5378	0.1	3.7078	0.125	3.7763	0.2	3.9445	0.25	4.0414	0.5	4.5006	0.75	5.0676	0.8	5.2369	0.875	5.5887	0.9	5.7378	0.95	6.2023	111	4.4585	0.54901
28	0.05	3.538	0.1	3.7059	0.125	3.7732	0.2	3.9419	0.25	4.0403	0.5	4.5007	0.75	5.074	0.8	5.2416	0.875	5.5827	0.9	5.7438	0.95	6.2146	111	4.2916	0.552685
29	0.05	3.574	0.1	3.7427	0.125	3.8078	0.2	3.9762	0.25	4.0732	0.5	4.5441	0.75	5.1328	0.8	5.2971	0.875	5.6272	0.9	5.7763	0.95	6.2682	111	4.2353	0.539407
30	0.05	3.6537	0.1	3.82	0.125	3.8877	0.2	4.0558	0.25	4.1532	0.5	4.6333	0.75	5.2357	0.8	5.3997	0.875	5.733	0.9	5.8807	0.95	6.3321	111	4.4534	0.534222
31	0.05	3.775	0.1	3.9453	0.125	4.0161	0.2	4.1917	0.25	4.2961	0.5	4.7849	0.75	5.3832	0.8	5.5444	0.875	5.8652	0.9	6.0093	0.95	6.429	111	4.5685	0.520916
32	0.05	3.9455	0.1	4.1299	0.125	4.2051	0.2	4.3925	0.25	4.5036	0.5	4.996	0.75	5.5846	0.8	5.7431	0.875	6.0598	0.9	6.2017	0.95	6.6082	111	4.8117	0.525431
33	0.05	4.1756	0.1	4.3712	0.125	4.4537	0.2	4.6568	0.25	4.7726	0.5	5.2768	0.75	5.8663	0.8	6.034	0.875	6.3588	0.9	6.4982	0.95	6.9278	111	5.1296	0.515171
34	0.05	4.4249	0.1	4.6577	0.125	4.746	0.2	4.9654	0.25	5.089	0.5	5.6426	0.75	6.2907	0.8	6.4666	0.875	6.8279	0.9	6.9938	0.95	7.4834	111	5.5738	0.468851
35	0.05	4.6605	0.1	4.9505	0.125	5.0535	0.2	5.311	0.25	5.4545	0.5	6.128	0.75	6.9125	0.8	7.1275	0.875	7.551	0.9	7.749	0.95	8.3	111	5.9825	0.377447
36	0.05	4.885	0.1	5.257	0.125	5.396	0.2	5.714	0.25	5.899	0.5	6.7605	0.75	7.7415	0.8	8.0145	0.875	8.5435	0.9	8.7715	0.95	9.4235	111	6.646	0.294144
37	0.05	5.1845	0.1	5.6305	0.125	5.7995	0.2	6.216	0.25	6.456	0.5	7.537	0.75	8.782	0.8	9.123	0.875	9.7705	0.9	10.051	0.95	10.8935	111	7.281	0.23569
38	0.05	5.626	0.1	6.131	0.125	6.337	0.2	6.856	0.25	7.145	0.5	8.441	0.75	10.002	0.8	10.417	0.875	11.222	0.9	11.583	0.95	12.656	111	7.762	0.197539
39	0.05	6.256	0.1	6.821	0.125	7.037	0.2	7.629	0.25	7.961	0.5	9.464	0.75	11.358	0.8	11.834	0.875	12.819	0.9	13.254	0.95	14.633	111	8.732	0.173132
40	0.05	7.024	0.1	7.667	0.125	7.907	0.2	8.52	0.25	8.881	0.5	10.598	0.75	12.719	0.8	13.294	0.875	14.45	0.9	14.995	0.95	16.585	111	9.91	0.148717
41	0.05	7.796	0.1	8.535	0.125	8.81	0.2	9.471	0.25	9.871	0.5	11.78	0.75	14.067	0.8	14.711	0.875	15.989	0.9	16.615	0.95	18.427	111	10.966	0.135773
42	0.05	8.454	0.1	9.28	0.125	9.59	0.2	10.351	0.25	10.795	0.5	12.845	0.75	15.311	0.8	15.982	0.875	17.375	0.9	18.009	0.95	20.005	111	12.124	0.124956
43	0.05	8.937	0.1	9.798	0.125	10.123	0.2	10.951	0.25	11.429	0.5	13.647	0.75	16.307	0.8	17.046	0.875	18.546	0.9	19.202	0.95	21.374	111	12.999	0.116109
44	0.05	9.157	0.1	10.036	0.125	10.348	0.2	11.175	0.25	11.661	0.5	14.016	0.75	16.899	0.8	17.693	0.875	19.317	0.9	20.052	0.95	22.265	111	12.442	0.107194
45	0.05	9.149	0.1	9.951	0.125	10.255	0.2	11.063	0.25	11.547	0.5	13.913	0.75	16.912	0.8	17.768	0.875	19.464	0.9	20.224	0.95	22.513	111	11.895	0.108985
46	0.05	8.894	0.1	9.638	0.125	9.915	0.2	10.679	0.25	11.148	0.5	13.428	0.75	16.322	0.8	17.12	0.875	18.778	0.9	19.566	0.95	21.885	111	11.551	0.11794
47	0.05	8.455	0.1	9.149	0.125	9.415	0.2	10.122	0.25	10.56	0.5	12.643	0.75	15.262	0.8	15.984	0.875	17.483	0.9	18.183	0.95	20.312	111	11.292	0.123948
48	0.05	7.952	0.1	8.59	0.125	8.837	0.2	9.479	0.25	9.884	0.5	11.68	0.75	13.977	0.8	14.625	0.875	15.945	0.9	16.533	0.95	18.38	111	10.745	0.143277
49	0.05	7.441	0.1	8.009	0.125	8.228	0.2	8.804	0.25	9.135	0.5	10.696	0.75	12.719	0.8	13.308	0.875	14.487	0.9	15.04	0.95	16.84	111	10.088	0.164161
50	0.05	6.958	0.1	7.425	0.125	7.622	0.2	8.134	0.25	8.431	0.5	9.852	0.75	11.69	0.8	12.255	0.875	13.404	0.9	13.939	0.95	15.644	111	9.5	0.179489
51	0.05	6.483	0.1	6.936	0.125	7.117	0.2	7.595	0.25	7.892	0.5	9.227	0.75	10.985	0.8	11.531	0.875	12.655	0.9	13.161	0.95	14.744	111	8.783	0.191395
52	0.05	6.163	0.1	6.616	0.125	6.794	0.2	7.271	0.25	7.563	0.5	8.879	0.75	10.587	0.8	11.094	0.875	12.168	0.9	12.666	0.95	14.182	111	8.484	0.19321
53	0.05	6.09	0.1	6.54	0.125	6.727	0.2	7.188	0.25	7.472	0.5	8.801	0.75	10.458	0.8	10.942	0.875	11.98	0.9	12.434	0.95	13.867	111	8.18	0.190917
54	0.05	6.275	0.1	6.733	0.125	6.912	0.2	7.365	0.25	7.643	0.5	8.97	0.75	10.603	0.8	11.094	0.875	12.076	0.9	12.505	0.95	13.843	111	8.137	0.191854
55	0.05	6.707	0.1	7.177	0.125	7.353	0.2	7.807	0.25	8.084	0.5	9.407	0.75	11.079	0.8	11.568	0.875	12.514	0.9	12.927	0.95	14.144	111	8.374	0.195192
56	0.05	7.292	0.1	7.808	0.125	8.001	0.2	8.486	0.25	8.773	0.5	10.154	0.75	11.891	0.8	12.39	0.875	13.381	0.9	13.796	0.95	15.025	111	9.236	0.185551
57	0.05	7.96	0.1	8.511	0.125	8.728	0.2	9.31	0.25	9.662	0.5	11.256	0.75	13.134	0.8	13.678	0.875	14.755	0.9	15.23	0.95	16.632	111	10.869	0.159584
58	0.05	8.617	0.1	9.27	0.125	9.541	0.2	10.25	0.25	10.663	0.5	12.591	0.75	14.876	0.8	15.492	0.875	16.681	0.9	17.271	0.95	19.016	111	12.024	0.133338
59	0.05	9.309	0.1	10.082	0.125	10.405	0.2	11.229	0.25	11.724	0.5	14.037	0.75	16.908	0.8	17.661	0.875	19.162	0.9	19.839	0.95	21.982	111	13.044	0.110558
60	0.05	10.036	0.1	10.913	0.125	11.28	0.2	12.212	0.25	12.772	0.5	15.452	0.75	18.906	0.8	19.827	0.875	21.613	0.9	22.451	0.95	25.032	111	14.1	0.0946828
61	0.05	10.727	0.1	11.704	0.125	12.091	0.2	13.108	0.25	13.715	0.5	16.631	0.75	20.422	0.8	21.454	0.875	23.502	0.9	24.41	0.95	27.325	111	15.323	0.0874588
62	0.05	11.274	0.1	12.316	0.125	12.727	0.2	13.748	0.25	14.387	0.5	17.365	0.75	21.16	0.8	22.237	0.875	24.375	0.9	25.301	0.95	28.203	111	15.774	0.0860894
63	0.05	11.496	0.1	12.56	0.125	12.973	0.2	13.983	0.25	14.579	0.5	17.409	0.75	21.03	0.8	22.054	0.875	24.164	0.9	25.085	0.95	27.718	111	15.551	0.0903358
64	0.05	11.259	0.1	12.249	0.125	12.631	0.2	13.568	0.25	14.129	0.5	16.753	0.75	20.141	0.8	21.108	0.875	23.114	0.9	24.023	0.95	26.587	111	15.301	0.0997049
65	0.05	10.482	0.1	11.355	0.125	11.694	0.2	12.581	0.25	13.092	0.5	15.562	0.75	18.766	0.8	19.673	0.875	21.598	0.9	22.461	0.95	24.874	111	14.381	0.103859
66	0.05	9.308	0.1	10.14	0.125	10.45	0.2	11.248	0.25	11.726	0.5	14.09	0.75	17.093	0.8	17.94	0.875	19.656	0.9	20.429	0.95	22.728	111	12.173	0.109187
67	0.05	8.091	0.1	8.846	0.125	9.124	0.2	9.852	0.25	10.294	0.5	12.483	0.75	15.218	0.8	15.982	0.875	17.471	0.9	18.132	0.95	20.169	111	11.28	0.11649
68	0.05	7.076	0.1	7.727	0.125	7.966	0.2	8.612	0.25	9.003	0.5	10.908	0.75	13.266	0.8	13.942	0.875	15.186	0.9	15.743	0.95	17.571	111	10.031	0.132237
69	0.05	6.327	0.1	6.855	0.125	7.06	0.2	7.596	0.25	7.915	0.5	9.468	0.75	11.425	0.8	11.979	0.875	13.045	0.9	13.519	0.95	15.052	111	8.306	0.164028
70	0.05	5.771	0.1	6.195	0.125	6.359	0.2	6.793	0.25	7.044	0.5	8.261	0.75	9.83	0.8	10.276	0.875	11.16	0.9	11.569	0.95	12.802	111	7.495	0.211043
71	0.05	5.319	0.1	5.668	0.125	5.805	0.2	6.164	0.25	6.373	0.5	7.33	0.75	8.559	0.8	8.922	0.875	9.634	0.9	9.959	0.95	10.938	111	6.867	0.268106
72	0.05	4.924	0.1	5.232	0.125	5.3505	0.2	5.663	0.25	5.8435	0.5	6.639	0.75	7.6375	0.8	7.9205	0.875	8.4875	0.9	8.745	0.95	9.5185	111	6.3405	0.321305
73	0.05	4.61	0.1	4.8755	0.125	4.984	0.2	5.2605	0.25	5.425	0.5	6.136	0.75	7.013	0.8	7.246	0.875	7.7125	0.9	7.9285	0.95	8.591	111	5.878	0.361782
74	0.05	4.3955	0.1	4.6255	0.125	4.7215	0.2	4.971	0.25	5.1155	0.5	5.7755	0.75	6.574	0.8	6.8005	0.875	7.233	0.9	7.432	0.95	8.0735	111	5.524	0.390309
75	0.05	4.2815	0.1	4.49	0.125	4.573	0.2	4.795	0.25	4.9245	0.5	5.5425	0.75	6.294	0.8	6.5065	0.875	6.941	0.9	7.1345	0.95	7.793	111	5.141	0.41102
76	0.05	4.2474	0.1	4.4474	0.125	4.5259	0.2	4.7277	0.25	4.8509	0.5	5.4294	0.75	6.1494	0.8	6.3438	0.875	6.7577	0.9	6.9513	0.95	7.569	111	5.2322	0.438357
77	0.05	4.2839	0.1	4.4774	0.125	4.5547	0.2	4.7569	0.25	4.8757	0.5	5.4338	0.75	6.1075	0.8	6.2922	0.875	6.6782	0.9	6.8568	0.95	7.4242	111	5.1765	0.457888
78	0.05	4.37	0.1	4.5687	0.125	4.652	0.2	4.8575	0.25	4.9758	0.5	5.5197	0.75	6.1654	0.8	6.3507	0.875	6.7236	0.9	6.896	0.95	7.4215	111	5.3545	0.465397
79	0.05	4.4836	0.1	4.7025	0.125	4.7825	0.2	4.9934	0.25	5.1138	0.5	5.6629	0.75	6.3407	0.8	6.5375	0.875	6.922	0.9	7.0971	0.95	7.6141	111	5.4075	0.463235
80	0.05	4.593	0.1	4.8225	0.125	4.918	0.2	5.1365	0.25	5.261	0.5	5.86	0.75	6.6245	0.8	6.8385	0.875	7.268	0.9	7.4595	0.95	8.026	111	5.5365	0.424131
81	0.05	4.6565	0.1	4.925	0.125	5.0275	0.2	5.2735	0.25	5.418	0.5	6.1035	0.75	6.9765	0.8	7.2195	0.875	7.6995	0.9	7.9345	0.95	8.5975	111	5.734	0.372257
82	0.05	4.691	0.1	5.002	0.125	5.1125	0.2	5.4035	0.25	5.569	0.5	6.347	0.75	7.3295	0.8	7.6025	0.875	8.1545	0.9	8.4135	0.95	9.1945	111	5.9925	0.32895
83	0.05	4.725	0.1	5.0585	0.125	5.183	0.2	5.5	0.25	5.6865	0.5	6.532	0.75	7.5995	0.8	7.8965	0.875	8.5035	0.9	8.7955	0.95	9.637	111	6.1545	0.301793
84	0.05	4.754	0.1	5.081	0.125	5.208	0.2	5.534	0.25	5.7215	0.5	6.595	0.75	7.69	0.8	8.0055	0.875	8.6445	0.9	8.948	0.95	9.827	111	6.1935	0.292808
85	0.05	4.715	0.1	5.034	0.125	5.157	0.2	5.467	0.25	5.652	0.5	6.492	0.75	7.565	0.8	7.88	0.875	8.517	0.9	8.816	0.95	9.702	111	5.961	0.309673
86	0.05	4.5865	0.1	4.874	0.125	4.9885	0.2	5.2815	0.25	5.4525	0.5	6.22	0.75	7.224	0.8	7.523	0.875	8.1275	0.9	8.4075	0.95	9.2145	111	5.864	0.33238
87	0.05	4.338	0.1	4.6035	0.125	4.7085	0.2	4.9695	0.25	5.118	0.5	5.806	0.75	6.7035	0.8	6.97	0.875	7.513	0.9	7.7595	0.95	8.481	111	5.574	0.372682
88	0.05	4.0185	0.1	4.2485	0.125	4.341	0.2	4.569	0.25	4.704	0.5	5.301	0.75	6.0695	0.8	6.2995	0.875	6.738	0.9	6.9545	0.95	7.5985	111	5.0065	0.428258
89	0.05	3.6865	0.1	3.875	0.125	3.9485	0.2	4.1435	0.25	4.2555	0.5	4.7555	0.75	5.391	0.8	5.5735	0.875	5.929	0.9	6.0995	0.95	6.6205	111	4.5415	0.512209
90	0.05	3.3865	0.1	3.5345	0.125	3.5925	0.2	3.7475	0.25	3.8365	0.5	4.24	0.75	4.7375	0.8	4.875	0.875	5.153	0.9	5.284	0.95	5.686	111	4.085	0.637476
91	0.05	3.1352	0.1	3.2513	0.125	3.2978	0.2	3.4142	0.25	3.4833	0.5	3.796	0.75	4.1671	0.8	4.2699	0.875	4.4776	0.9	4.5729	0.95	4.8591	111	3.6834	0.822557
92	0.05	2.9419	0.1	3.0321	0.125	3.0669	0.2	3.1535	0.25	3.2071	0.5	3.4412	0.75	3.715	0.8	3.7896	0.875	3.9399	0.9	4.0074	0.95	4.2143	111	3.3663	1.09802
93	0.05	2.7978	0.1	2.8682	0.125	2.8952	0.2	2.9632	0.25	3.0032	0.5	3.1787	0.75	3.3824	0.8	3.4382	0.875	3.5505	0.9	3.5997	0.95	3.7494	111	3.12	1.45275
94	0.05	2.6949	0.1	2.7516	0.125	2.7739	0.2	2.829	0.25	2.8602	0.5	2.9994	0.75	3.1598	0.8	3.2036	0.875	3.2919	0.9	3.3326	0.95	3.4479	111	2.9663	1.85506
95	0.05	2.6286	0.1	2.6778	0.125	2.6965	0.2	2.7449	0.25	2.772	0.5	2.8925	0.75	3.0288	0.8	3.0661	0.875	3.1408	0.9	3.174	0.95	3.2748	111	2.8803	2.17078
96	0.05	2.5974	0.1	2.6454	0.125	2.6635	0.2	2.7077	0.25	2.7331	0.5	2.8451	0.75	2.9731	0.8	3.007	0.875	3.0748	0.9	3.1059	0.95	3.1976	111	2.8228	2.33029
97	0.05	2.6042	0.1	2.6522	0.125	2.6707	0.2	2.7154	0.25	2.7417	0.5	2.8516	0.75	2.9809	0.8	3.0151	0.875	3.0809	0.9	3.1114	0.95	3.2017	111	2.8158	2.35959
98	0.05	2.6503	0.1	2.7008	0.125	2.7207	0.2	2.7673	0.25	2.7942	0.5	2.9118	0.75	3.0486	0.8	3.0843	0.875	3.1552	0.9	3.1867	0.95	3.2815	111	2.8753	2.17878
99	0.05	2.7361	0.1	2.7909	0.125	2.8118	0.2	2.8638	0.25	2.8934	0.5	3.0268	0.75	3.1781	0.8	3.2204	0.875	3.3011	0.9	3.3365	0.95	3.4435	111	2.9934	1.93076
100	0.05	2.8554	0.1	2.9214	0.125	2.9454	0.2	3.0069	0.25	3.0426	0.5	3.1984	0.75	3.3788	0.8	3.429	0.875	3.5258	0.9	3.5703	0.95	3.7017	111	3.1407	1.64571
101	0.05	3.0054	0.1	3.0856	0.125	3.1169	0.2	3.1918	0.25	3.234	0.5	3.4238	0.75	3.6503	0.8	3.7127	0.875	3.8353	0.9	3.892	0.95	4.0555	111	3.3592	1.35188
102	0.05	3.1762	0.1	3.2748	0.125	3.3132	0.2	3.4037	0.25	3.4564	0.5	3.6922	0.75	3.9733	0.8	4.0539	0.875	4.2114	0.9	4.2802	0.95	4.493	111	3.6163	1.08846
103	0.05	3.3516	0.1	3.4675	0.125	3.5127	0.2	3.6239	0.25	3.686	0.5	3.9746	0.75	4.3104	0.8	4.4073	0.875	4.6014	0.9	4.6924	0.95	4.9484	111	3.8764	0.886037
104	0.05	3.5037	0.1	3.6372	0.125	3.6882	0.2	3.8159	0.25	3.8897	0.5	4.221	0.75	4.6062	0.8	4.7146	0.875	4.9345	0.9	5.0355	0.95	5.3321	111	4.124	0.770313
105	0.05	3.5996	0.1	3.7424	0.125	3.7979	0.2	3.938	0.25	4.0202	0.5	4.3812	0.75	4.7971	0.8	4.9122	0.875	5.139	0.9	5.2435	0.95	5.5536	111	4.2852	0.70768
106	0.05	3.6049	0.1	3.751	0.125	3.8085	0.2	3.952	0.25	4.0356	0.5	4.409	0.75	4.8456	0.8	4.9625	0.875	5.2045	0.9	5.3103	0.95	5.6412	111	4.2809	0.685095
107	0.05	3.5024	0.1	3.6471	0.125	3.7024	0.2	3.8451	0.25	3.9284	0.5	4.3041	0.75	4.7594	0.8	4.8894	0.875	5.1379	0.9	5.2507	0.95	5.5894	111	4.1375	0.677229
108	0.05	3.3133	0.1	3.4519	0.125	3.5068	0.2	3.6475	0.25	3.7301	0.5	4.1104	0.75	4.5728	0.8	4.7007	0.875	4.952	0.9	5.0636	0.95	5.3941	111	3.9518	0.667915
109	0.05	3.091	0.1	3.2237	0.125	3.2783	0.2	3.4178	0.25	3.5012	0.5	3.8756	0.75	4.3117	0.8	4.4307	0.875	4.6641	0.9	4.7687	0.95	5.0716	111	3.7474	0.68133
110	0.05	2.8981	0.1	3.0181	0.125	3.0704	0.2	3.205	0.25	3.2845	0.5	3.6314	0.75	4.0176	0.8	4.1224	0.875	4.3277	0.9	4.4185	0.95	4.681	111	3.565	0.747078
111	0.05	2.7634	0.1	2.8687	0.125	2.9132	0.2	3.0354	0.25	3.1043	0.5	3.4013	0.75	3.7294	0.8	3.8171	0.875	3.9896	0.9	4.065	0.95	4.2861	111	3.369	0.88439
112	0.05	2.6881	0.1	2.7766	0.125	2.8139	0.2	2.9128	0.25	2.9685	0.5	3.2103	0.75	3.4765	0.8	3.5492	0.875	3.6935	0.9	3.756	0.95	3.9357	111	3.1738	1.07982
113	0.05	2.6611	0.1	2.7337	0.125	2.763	0.2	2.8366	0.25	2.8789	0.5	3.067	0.75	3.2818	0.8	3.3417	0.875	3.4589	0.9	3.511	0.95	3.658	111	3.0149	1.36043
114	0.05	2.6625	0.1	2.7214	0.125	2.744	0.2	2.8	0.25	2.8325	0.5	2.9806	0.75	3.1537	0.8	3.2032	0.875	3.3008	0.9	3.3441	0.95	3.472	111	2.9333	1.72292
115	0.05	2.673	0.1	2.7236	0.125	2.7435	0.2	2.7941	0.25	2.8228	0.5	2.9522	0.75	3.1027	0.8	3.1457	0.875	3.2316	0.9	3.2713	0.95	3.3865	111	2.9056	1.97946
116	0.05	2.6823	0.1	2.7359	0.125	2.7575	0.2	2.8107	0.25	2.8406	0.5	2.9757	0.75	3.1342	0.8	3.1782	0.875	3.2654	0.9	3.3057	0.95	3.4281	111	2.9306	1.90385
117	0.05	2.7126	0.1	2.7725	0.125	2.7954	0.2	2.8545	0.25	2.8891	0.5	3.0472	0.75	3.2396	0.8	3.2952	0.875	3.4066	0.9	3.4579	0.95	3.6088	111	2.9528	1.61764
118	0.05	2.7761	0.1	2.8462	0.125	2.8743	0.2	2.9428	0.25	2.9818	0.5	3.174	0.75	3.4247	0.8	3.4963	0.875	3.6402	0.9	3.7081	0.95	3.9035	111	3.0421	1.33637
119	0.05	2.8854	0.1	2.9682	0.125	3.003	0.2	3.0877	0.25	3.1362	0.5	3.3751	0.75	3.6919	0.8	3.7822	0.875	3.9613	0.9	4.04	0.95	4.2844	111	3.2069	1.07801
120	0.05	3.0515	0.1	3.155	0.125	3.1963	0.2	3.3019	0.25	3.3642	0.5	3.6638	0.75	4.0445	0.8	4.1528	0.875	4.3658	0.9	4.4628	0.95	4.7654	111	3.4636	0.854941
121	0.05	3.2849	0.1	3.41	0.125	3.4615	0.2	3.5931	0.25	3.669	0.5	4.0366	0.75	4.4921	0.8	4.6273	0.875	4.898	0.9	5.0235	0.95	5.3991	111	3.8419	0.692105
122	0.05	3.5762	0.1	3.7257	0.125	3.7875	0.2	3.9464	0.25	4.0396	0.5	4.484	0.75	5.0766	0.8	5.2509	0.875	5.6093	0.9	5.7759	0.95	6.2886	111	4.2275	0.572744
123	0.05	3.8775	0.1	4.0595	0.125	4.1315	0.2	4.326	0.25	4.4425	0.5	5.0165	0.75	5.818	0.8	6.055	0.875	6.541	0.9	6.7615	0.95	7.4545	111	4.5965	0.452229
124	0.05	4.135	0.1	4.3625	0.125	4.4575	0.2	4.707	0.25	4.865	0.5	5.6415	0.75	6.6995	0.8	7.0115	0.875	7.631	0.9	7.916	0.95	8.827	111	5.0055	0.330304
125	0.05	4.528	0.1	4.611	0.125	4.744	0.2	5.094	0.25	5.306	0.5	6.319	0.75	7.619	0.8	7.997	0.875	8.74	0.9	9.093	0.95	10.226	111	5.569	0.249648
126	0.05	4.616	0.1	4.841	0.125	5.01	0.2	5.46	0.25	5.727	0.5	6.939	0.75	8.42	0.8	8.856	0.875	9.711	0.9	10.12	0.95	11.408	111	6.475	0.209184
127	0.05	4.647	0.1	5.081	0.125	5.279	0.2	5.785	0.25	6.067	0.5	7.386	0.75	8.983	0.8	9.439	0.875	10.375	0.9	10.808	0.95	12.211	111	6.841	0.193492
128	0.05	4.877	0.1	5.343	0.125	5.534	0.2	6.023	0.25	6.289	0.5	7.592	0.75	9.209	0.8	9.667	0.875	10.604	0.9	11.067	0.95	12.452	111	6.776	0.195255
129	0.05	5.111	0.1	5.544	0.125	5.707	0.2	6.124	0.25	6.371	0.5	7.548	0.75	9.085	0.8	9.533	0.875	10.437	0.9	10.875	0.95	12.219	111	6.742	0.218493
130	0.05	5.242	0.1	5.602	0.125	5.74	0.2	6.091	0.25	6.301	0.5	7.325	0.75	8.708	0.8	9.111	0.875	9.947	0.9	10.342	0.95	11.557	111	6.631	0.249801
131	0.05	5.195	0.1	5.503	0.125	5.623	0.2	5.931	0.25	6.115	0.5	7.007	0.75	8.205	0.8	8.564	0.875	9.278	0.9	9.618	0.95	10.666	111	6.406	0.286328
132	0.05	5.001	0.1	5.287	0.125	5.398	0.2	5.68	0.25	5.847	0.5	6.637	0.75	7.672	0.8	7.974	0.875	8.598	0.9	8.885	0.95	9.755	111	6.184	0.322447
133	0.05	4.756	0.1	5.025	0.125	5.13	0.2	5.393	0.25	5.545	0.5	6.263	0.75	7.177	0.8	7.443	0.875	7.973	0.9	8.22	0.95	8.957	111	5.945	0.35274
134	0.05	4.543	0.1	4.792	0.125	4.89	0.2	5.131	0.25	5.269	0.5	5.925	0.75	6.753	0.8	6.986	0.875	7.474	0.9	7.692	0.95	8.337	111	5.651	0.388525
135	0.05	4.3975	0.1	4.6265	0.125	4.717	0.2	4.9385	0.25	5.0685	0.5	5.669	0.75	6.43	0.8	6.645	0.875	7.1025	0.9	7.308	0.95	7.95	111	5.389	0.424062
136	0.05	4.315	0.1	4.5395	0.125	4.621	0.2	4.832	0.25	4.9565	0.5	5.5295	0.75	6.2595	0.8	6.4765	0.875	6.9225	0.9	7.1315	0.95	7.773	111	5.239	0.444509
137	0.05	4.2935	0.1	4.5155	0.125	4.6	0.2	4.8145	0.25	4.9415	0.5	5.5365	0.75	6.305	0.8	6.534	0.875	7.0005	0.9	7.2215	0.95	7.9085	111	5.2805	0.426858
138	0.05	4.3315	0.1	4.568	0.125	4.662	0.2	4.898	0.25	5.0385	0.5	5.721	0.75	6.609	0.8	6.872	0.875	7.3955	0.9	7.6515	0.95	8.4125	111	5.451	0.373639
139	0.05	4.452	0.1	4.726	0.125	4.837	0.2	5.114	0.25	5.2865	0.5	6.1145	0.75	7.201	0.8	7.5125	0.875	8.1695	0.9	8.483	0.95	9.419	111	5.7715	0.306046
140	0.05	4.705	0.1	5.026	0.125	5.161	0.2	5.509	0.25	5.722	0.5	6.766	0.75	8.143	0.8	8.549	0.875	9.402	0.9	9.807	0.95	11.047	111	6.019	0.24704
141	0.05	5.124	0.1	5.53	0.125	5.694	0.2	6.13	0.25	6.398	0.5	7.721	0.75	9.504	0.8	10.05	0.875	11.197	0.9	11.743	0.95	13.4	111	6.713	0.196787
142	0.05	5.771	0.1	6.272	0.125	6.476	0.2	7.026	0.25	7.358	0.5	9.023	0.75	11.359	0.8	12.105	0.875	13.618	0.9	14.329	0.95	16.54	111	7.774	0.156037
143	0.05	6.665	0.1	7.296	0.125	7.547	0.2	8.233	0.25	8.659	0.5	10.708	0.75	13.736	0.8	14.68	0.875	16.67	0.9	17.596	0.95	20.413	111	9.212	0.126675
144	0.05	7.78	0.1	8.569	0.125	8.896	0.2	9.741	0.25	10.25	0.5	12.759	0.75	16.483	0.8	17.688	0.875	20.152	0.9	21.276	0.95	24.609	111	10.972	0.102936
145	0.05	9.016	0.1	10.022	0.125	10.417	0.2	11.444	0.25	12.051	0.5	15.066	0.75	19.347	0.8	20.721	0.875	23.529	0.9	24.797	0.95	28.606	111	12.923	0.0857688
146	0.05	10.262	0.1	11.436	0.125	11.913	0.2	13.112	0.25	13.811	0.5	17.234	0.75	21.83	0.8	23.293	0.875	26.241	0.9	27.607	0.95	31.712	111	14.779	0.07544
147	0.05	11.294	0.1	12.578	0.125	13.107	0.2	14.428	0.25	15.175	0.5	18.818	0.75	23.45	0.8	24.85	0.875	27.83	0.9	29.181	0.95	33.326	111	16.125	0.0697719
148	0.05	11.965	0.1	13.234	0.125	13.724	0.2	15.056	0.25	15.837	0.5	19.408	0.75	23.857	0.8	25.187	0.875	27.927	0.9	29.21	0.95	33.364	111	17.605	0.0713731
149	0.05	12.054	0.1	13.194	0.125	13.661	0.2	14.89	0.25	15.624	0.5	18.904	0.75	23.038	0.8	24.258	0.875	26.774	0.9	27.881	0.95	31.623	111	16.833	0.079179
150	0.05	11.444	0.1	12.503	0.125	12.932	0.2	14.002	0.25	14.629	0.5	17.552	0.75	21.268	0.8	22.355	0.875	24.559	0.9	25.596	0.95	28.929	111	16.38	0.0875074
151	0.05	10.326	0.1	11.296	0.125	11.664	0.2	12.603	0.25	13.148	0.5	15.736	0.75	19.044	0.8	20.017	0.875	21.933	0.9	22.853	0.95	25.68	111	14.086	0.0990076
152	0.05	9.014	0.1	9.879	0.125	10.198	0.2	10.991	0.25	11.475	0.5	13.778	0.75	16.788	0.8	17.659	0.875	19.382	0.9	20.153	0.95	22.469	111	11.956	0.110658
153	0.05	7.844	0.1	8.548	0.125	8.819	0.2	9.511	0.25	9.913	0.5	11.968	0.75	14.703	0.8	15.503	0.875	17.068	0.9	17.748	0.95	19.753	111	10.412	0.124674
154	0.05	6.983	0.1	7.543	0.125	7.758	0.2	8.336	0.25	8.68	0.5	10.443	0.75	12.939	0.8	13.646	0.875	15.068	0.9	15.724	0.95	17.545	111	8.949	0.148156
155	0.05	6.386	0.1	6.854	0.125	7.038	0.2	7.512	0.25	7.812	0.5	9.309	0.75	11.534	0.8	12.183	0.875	13.462	0.9	14.027	0.95	15.724	111	8.066	0.176295
156	0.05	6.006	0.1	6.42	0.125	6.59	0.2	7.02	0.25	7.276	0.5	8.586	0.75	10.518	0.8	11.105	0.875	12.26	0.9	12.781	0.95	14.415	111	7.508	0.20061
157	0.05	5.785	0.1	6.196	0.125	6.362	0.2	6.77	0.25	7.017	0.5	8.25	0.75	9.96	0.8	10.458	0.875	11.49	0.9	11.999	0.95	13.582	111	7.281	0.209091
158	0.05	5.667	0.1	6.101	0.125	6.272	0.2	6.71	0.25	6.977	0.5	8.216	0.75	9.841	0.8	10.323	0.875	11.306	0.9	11.789	0.95	13.381	111	7.602	0.204809
