# Supplementary material for: Time-varying asymmetry and tail thickness in long series of daily financial returns
Source: publisher site journal article supplement (doi:10.1515/snde-2017-0071), 2018-10-02
Supplement: Supplementary file 383 [file thres_ni2.xlsx]

## Sheet: 1
	Var1	Var2	Var3	Var4	Var5	Var6	Var7	Var8	Var9	Var10	Var11	Var12	Var13	Var14	Var15	Var16	Var17	Var18	Var19	Var20	Var21	Var22	Var23	Var24	Var25
1	0	0	0	0	0	0	0	0	0	0	0	0	0	0	0	0	0	0	0	0	0	0	0	0	0
2	0.05	3.849	0.1	4.1335	0.125	4.252	0.2	4.5825	0.25	4.777	0.5	5.79	0.75	7.081	0.8	7.4295	0.875	8.113	0.9	8.4475	0.95	9.5695	111	4.8585	0.267104
3	0.05	3.9565	0.1	4.257	0.125	4.3765	0.2	4.689	0.25	4.879	0.5	5.8205	0.75	6.956	0.8	7.2875	0.875	7.9385	0.9	8.2415	0.95	9.214	111	4.993	0.276499
4	0.05	4.0495	0.1	4.3395	0.125	4.4525	0.2	4.758	0.25	4.9355	0.5	5.759	0.75	6.783	0.8	7.0725	0.875	7.6515	0.9	7.9235	0.95	8.798	111	5.1405	0.309012
5	0.05	4.0435	0.1	4.317	0.125	4.4295	0.2	4.7115	0.25	4.8715	0.5	5.6435	0.75	6.578	0.8	6.8385	0.875	7.38	0.9	7.642	0.95	8.421	111	5.394	0.330281
6	0.05	3.903	0.1	4.1655	0.125	4.271	0.2	4.547	0.25	4.709	0.5	5.4825	0.75	6.395	0.8	6.6535	0.875	7.168	0.9	7.4125	0.95	8.151	111	4.865	0.331041
7	0.05	3.6695	0.1	3.918	0.125	4.0245	0.2	4.309	0.25	4.478	0.5	5.2575	0.75	6.2005	0.8	6.467	0.875	7.0035	0.9	7.254	0.95	7.991	111	4.6685	0.333695
8	0.05	3.437	0.1	3.68	0.125	3.7835	0.2	4.0635	0.25	4.2285	0.5	5.001	0.75	5.9975	0.8	6.27	0.875	6.8235	0.9	7.0795	0.95	7.901	111	4.4345	0.342481
9	0.05	3.273	0.1	3.504	0.125	3.6055	0.2	3.8615	0.25	4.0135	0.5	4.7565	0.75	5.7605	0.8	6.04	0.875	6.605	0.9	6.876	0.95	7.707	111	4.1205	0.34272
10	0.05	3.2945	0.1	3.4065	0.125	3.501	0.2	3.7345	0.25	3.877	0.5	4.566	0.75	5.5185	0.8	5.7795	0.875	6.339	0.9	6.587	0.95	7.4055	111	4.1035	0.387501
11	0.05	3.441	0.1	3.441	0.125	3.4845	0.2	3.702	0.25	3.8265	0.5	4.4555	0.75	5.3135	0.8	5.5575	0.875	6.0445	0.9	6.2795	0.95	7.0315	111	3.9575	0.412225
12	0.05	3.501	0.1	3.501	0.125	3.5595	0.2	3.762	0.25	3.8755	0.5	4.4365	0.75	5.1835	0.8	5.392	0.875	5.831	0.9	6.043	0.95	6.683	111	3.9485	0.451079
13	0.05	3.529	0.1	3.6645	0.125	3.735	0.2	3.9215	0.25	4.03	0.5	4.5365	0.75	5.178	0.8	5.3645	0.875	5.733	0.9	5.9015	0.95	6.4755	111	4.2295	0.502431
14	0.05	3.7478	0.1	3.9305	0.125	4.0005	0.2	4.1733	0.25	4.2757	0.5	4.7638	0.75	5.3742	0.8	5.5477	0.875	5.8713	0.9	6.0087	0.95	6.4687	111	4.5447	0.520583
15	0.05	4.0491	0.1	4.2389	0.125	4.3107	0.2	4.4991	0.25	4.6103	0.5	5.1455	0.75	5.8193	0.8	6.0058	0.875	6.352	0.9	6.504	0.95	6.9498	111	4.7655	0.476842
16	0.05	4.332	0.1	4.5545	0.125	4.6405	0.2	4.8765	0.25	5.0215	0.5	5.6915	0.75	6.5775	0.8	6.819	0.875	7.274	0.9	7.487	0.95	8.1445	111	5.4015	0.378434
17	0.05	4.581	0.1	4.876	0.125	5.002	0.2	5.319	0.25	5.5075	0.5	6.441	0.75	7.704	0.8	8.0475	0.875	8.7135	0.9	9.0265	0.95	10.0555	111	5.9425	0.283504
18	0.05	4.8445	0.1	5.2515	0.125	5.4155	0.2	5.823	0.25	6.074	0.5	7.362	0.75	9.158	0.8	9.6405	0.875	10.636	0.9	11.115	0.95	12.5295	111	6.345	0.203401
19	0.05	5.171	0.1	5.66	0.125	5.852	0.2	6.372	0.25	6.709	0.5	8.382	0.75	10.785	0.8	11.451	0.875	12.757	0.9	13.369	0.95	15.257	111	7.314	0.158852
20	0.05	5.513	0.1	6.077	0.125	6.308	0.2	6.952	0.25	7.367	0.5	9.332	0.75	12.209	0.8	13.047	0.875	14.676	0.9	15.42	0.95	17.597	111	8.237	0.137554
21	0.05	5.836	0.1	6.488	0.125	6.745	0.2	7.473	0.25	7.926	0.5	10.023	0.75	13.095	0.8	13.987	0.875	15.744	0.9	16.571	0.95	19.163	111	8.607	0.126835
22	0.05	6.1	0.1	6.802	0.125	7.083	0.2	7.817	0.25	8.256	0.5	10.305	0.75	13.229	0.8	14.056	0.875	15.721	0.9	16.525	0.95	19.23	111	9.206	0.124788
23	0.05	6.233	0.1	6.903	0.125	7.183	0.2	7.877	0.25	8.273	0.5	10.1	0.75	12.608	0.8	13.318	0.875	14.755	0.9	15.429	0.95	17.889	111	9.16	0.140499
24	0.05	6.156	0.1	6.738	0.125	6.963	0.2	7.571	0.25	7.92	0.5	9.518	0.75	11.531	0.8	12.15	0.875	13.364	0.9	13.905	0.95	15.786	111	8.559	0.160602
25	0.05	5.786	0.1	6.272	0.125	6.489	0.2	7.013	0.25	7.311	0.5	8.671	0.75	10.386	0.8	10.902	0.875	11.886	0.9	12.318	0.95	13.746	111	7.768	0.192387
26	0.05	5.3025	0.1	5.7355	0.125	5.9025	0.2	6.339	0.25	6.5955	0.5	7.791	0.75	9.2995	0.8	9.7235	0.875	10.5305	0.9	10.904	0.95	12.056	111	7.04	0.212929
27	0.05	4.8545	0.1	5.2215	0.125	5.369	0.2	5.741	0.25	5.955	0.5	7.0195	0.75	8.3375	0.8	8.709	0.875	9.4125	0.9	9.7275	0.95	10.6685	111	6.2415	0.239872
28	0.05	4.5545	0.1	4.863	0.125	4.9895	0.2	5.312	0.25	5.4985	0.5	6.4195	0.75	7.5825	0.8	7.8955	0.875	8.5155	0.9	8.7935	0.95	9.5945	111	5.7515	0.277559
29	0.05	4.442	0.1	4.7005	0.125	4.805	0.2	5.0815	0.25	5.2485	0.5	6.0465	0.75	7.051	0.8	7.325	0.875	7.8705	0.9	8.1115	0.95	8.821	111	5.549	0.31918
30	0.05	4.4745	0.1	4.716	0.125	4.813	0.2	5.0615	0.25	5.2095	0.5	5.9195	0.75	6.8015	0.8	7.0495	0.875	7.529	0.9	7.7425	0.95	8.393	111	5.621	0.35541
31	0.05	4.592	0.1	4.855	0.125	4.9585	0.2	5.214	0.25	5.3615	0.5	6.051	0.75	6.921	0.8	7.1485	0.875	7.6045	0.9	7.812	0.95	8.444	111	5.8185	0.370779
32	0.05	4.8195	0.1	5.0955	0.125	5.206	0.2	5.4875	0.25	5.6525	0.5	6.445	0.75	7.448	0.8	7.726	0.875	8.2835	0.9	8.5555	0.95	9.406	111	5.9325	0.317861
33	0.05	5.184	0.1	5.492	0.125	5.6195	0.2	5.9475	0.25	6.142	0.5	7.079	0.75	8.441	0.8	8.8705	0.875	9.86	0.9	10.3685	0.95	11.181	111	6.505	0.275016
34	0.05	5.711	0.1	6.1005	0.125	6.255	0.2	6.662	0.25	6.908	0.5	8.086	0.75	9.981	0.8	10.697	0.875	11.9495	0.9	11.9495	0.95	11.9495	111	7.353	0.221274
35	0.05	6.4155	0.1	6.954	0.125	7.167	0.2	7.707	0.25	8.0375	0.5	9.615	0.75	12.2655	0.8	13.3355	0.875	15.782	0.9	15.782	0.95	15.782	111	8.7135	0.164961
36	0.05	7.351	0.1	8.103	0.125	8.403	0.2	9.166	0.25	9.594	0.5	11.847	0.75	15.336	0.8	16.634	0.875	20.009	0.9	21.724	0.95	22.145	111	9.915	0.118085
37	0.05	8.58	0.1	9.573	0.125	9.996	0.2	10.999	0.25	11.591	0.5	14.737	0.75	19.093	0.8	20.554	0.875	24.033	0.9	25.849	0.95	30.353	111	11.709	0.0852688
38	0.05	10.052	0.1	11.353	0.125	11.879	0.2	13.157	0.25	13.91	0.5	17.829	0.75	23.099	0.8	24.669	0.875	27.925	0.9	29.473	0.95	34.444	111	14.117	0.067902
39	0.05	11.646	0.1	13.051	0.125	13.678	0.2	15.162	0.25	16.061	0.5	20.585	0.75	26.462	0.8	28.083	0.875	31.502	0.9	33.049	0.95	37.922	111	16.513	0.0584584
40	0.05	12.669	0.1	14.149	0.125	14.8	0.2	16.504	0.25	17.501	0.5	22.291	0.75	28.771	0.8	30.666	0.875	34.506	0.9	36.277	0.95	42.05	111	19.396	0.0536898
41	0.05	12.513	0.1	14.33	0.125	15.009	0.2	16.766	0.25	17.836	0.5	22.806	0.75	30.188	0.8	32.3	0.875	36.519	0.9	38.429	0.95	44.882	111	20.169	0.0514397
42	0.05	11.355	0.1	13.334	0.125	14.133	0.2	16.06	0.25	17.226	0.5	22.535	0.75	29.995	0.8	32.046	0.875	36.389	0.9	38.365	0.95	45.213	111	19.704	0.0483065
43	0.05	10.191	0.1	11.948	0.125	12.733	0.2	14.8	0.25	16.063	0.5	21.18	0.75	27.964	0.8	29.936	0.875	33.919	0.9	35.721	0.95	41.81	111	19.102	0.052615
44	0.05	9.33	0.1	10.771	0.125	11.497	0.2	13.382	0.25	14.493	0.5	19.031	0.75	24.563	0.8	26.193	0.875	29.592	0.9	31.168	0.95	36.108	111	17.808	0.0583445
45	0.05	8.792	0.1	10.042	0.125	10.588	0.2	11.999	0.25	12.836	0.5	16.376	0.75	20.612	0.8	21.897	0.875	24.531	0.9	25.818	0.95	29.514	111	15.402	0.0732741
46	0.05	8.691	0.1	9.512	0.125	9.865	0.2	10.799	0.25	11.343	0.5	13.846	0.75	17.004	0.8	17.904	0.875	19.761	0.9	20.683	0.95	23.448	111	12.615	0.102835
47	0.05	8.206	0.1	8.873	0.125	9.141	0.2	9.786	0.25	10.153	0.5	11.902	0.75	14.134	0.8	14.77	0.875	16.106	0.9	16.744	0.95	18.725	111	10.753	0.147054
48	0.05	7.313	0.1	7.92	0.125	8.149	0.2	8.712	0.25	9.05	0.5	10.57	0.75	12.386	0.8	12.901	0.875	13.952	0.9	14.418	0.95	15.908	111	10.009	0.166731
49	0.05	6.48	0.1	7.019	0.125	7.219	0.2	7.728	0.25	8.026	0.5	9.462	0.75	11.419	0.8	12.019	0.875	13.232	0.9	13.804	0.95	15.508	111	8.756	0.179395
50	0.05	5.968	0.1	6.424	0.125	6.606	0.2	7.067	0.25	7.34	0.5	8.701	0.75	10.816	0.8	11.581	0.875	13.279	0.9	14.036	0.95	16.502	111	7.709	0.19066
51	0.05	5.764	0.1	6.182	0.125	6.353	0.2	6.785	0.25	7.052	0.5	8.408	0.75	10.592	0.8	11.464	0.875	13.569	0.9	14.615	0.95	17.634	111	7.324	0.195064
52	0.05	5.86	0.1	6.291	0.125	6.459	0.2	6.923	0.25	7.193	0.5	8.5875	0.75	10.8165	0.8	11.699	0.875	13.88	0.9	15.0285	0.95	15.802	111	7.417	0.193394
53	0.05	6.266	0.1	6.78	0.125	6.986	0.2	7.495	0.25	7.791	0.5	9.276	0.75	11.546	0.8	12.361	0.875	14.267	0.9	15.281	0.95	16.697	111	8.129	0.179398
54	0.05	7.071	0.1	7.709	0.125	7.954	0.2	8.557	0.25	8.888	0.5	10.513	0.75	12.827	0.8	13.558	0.875	15.062	0.9	15.807	0.95	18.125	111	9.363	0.160159
55	0.05	8.275	0.1	9.047	0.125	9.334	0.2	10.026	0.25	10.435	0.5	12.323	0.75	14.739	0.8	15.403	0.875	16.766	0.9	17.406	0.95	19.284	111	11.318	0.13436
56	0.05	9.605	0.1	10.528	0.125	10.892	0.2	11.777	0.25	12.292	0.5	14.671	0.75	17.629	0.8	18.488	0.875	20.108	0.9	20.846	0.95	23.107	111	13.369	0.10718
57	0.05	10.57	0.1	11.895	0.125	12.385	0.2	13.61	0.25	14.315	0.5	17.69	0.75	21.86	0.8	23.07	0.875	25.49	0.9	26.595	0.95	30.15	111	15.35	0.0749762
58	0.05	11.24	0.1	12.955	0.125	13.67	0.2	15.47	0.25	16.55	0.5	21.41	0.75	27.295	0.8	28.925	0.875	32.275	0.9	33.98	0.95	39.42	111	19.455	0.0524513
59	0.05	12.58	0.1	13.92	0.125	14.87	0.2	17.385	0.25	18.89	0.5	25.17	0.75	32.825	0.8	34.94	0.875	39.415	0.9	41.63	0.95	49.085	111	22.62	0.0409388
60	0.05	12.81	0.1	15.06	0.125	16.14	0.2	19.07	0.25	20.75	0.5	28.03	0.75	36.96	0.8	39.6	0.875	45	0.9	47.7	0.95	56.19	111	25	0.0349876
61	0.05	13.89	0.1	16.23	0.125	17.24	0.2	20.03	0.25	21.62	0.5	29.1	0.75	38.28	0.8	41.16	0.875	47.16	0.9	49.89	0.95	58.72	111	23.45	0.0345893
62	0.05	14.69	0.1	16.81	0.125	17.73	0.2	19.95	0.25	21.27	0.5	27.84	0.75	36.4	0.8	38.98	0.875	44.57	0.9	47.35	0.95	55.65	111	22.78	0.0408212
63	0.05	14.595	0.1	16.295	0.125	16.965	0.2	18.655	0.25	19.705	0.5	24.835	0.75	31.815	0.8	33.935	0.875	38.655	0.9	40.86	0.95	47.73	111	20.83	0.0508479
64	0.05	13.16	0.1	14.445	0.125	14.945	0.2	16.245	0.25	17.035	0.5	20.825	0.75	26.08	0.8	27.72	0.875	31.205	0.9	32.855	0.95	37.815	111	18.565	0.0677931
65	0.05	10.917	0.1	11.85	0.125	12.217	0.2	13.209	0.25	13.817	0.5	16.669	0.75	20.562	0.8	21.744	0.875	24.2	0.9	25.298	0.95	28.738	111	14.691	0.089701
66	0.05	8.582	0.1	9.307	0.125	9.587	0.2	10.315	0.25	10.74	0.5	12.91	0.75	15.85	0.8	16.702	0.875	18.42	0.9	19.183	0.95	21.602	111	11.151	0.119744
67	0.05	6.693	0.1	7.245	0.125	7.457	0.2	8.005	0.25	8.323	0.5	9.964	0.75	12.125	0.8	12.755	0.875	14.042	0.9	14.641	0.95	16.491	111	8.599	0.160612
68	0.05	5.368	0.1	5.779	0.125	5.947	0.2	6.378	0.25	6.632	0.5	7.857	0.75	9.472	0.8	9.941	0.875	10.914	0.9	11.371	0.95	12.765	111	7.111	0.21001
69	0.05	4.5335	0.1	4.85	0.125	4.9835	0.2	5.3315	0.25	5.537	0.5	6.4795	0.75	7.714	0.8	8.0815	0.875	8.831	0.9	9.172	0.95	10.2095	111	5.9695	0.27372
70	0.05	4.065	0.1	4.3335	0.125	4.4395	0.2	4.7205	0.25	4.891	0.5	5.6525	0.75	6.6335	0.8	6.929	0.875	7.5375	0.9	7.7975	0.95	8.5975	111	5.218	0.34005
71	0.05	3.8685	0.1	4.0995	0.125	4.1925	0.2	4.433	0.25	4.58	0.5	5.233	0.75	6.074	0.8	6.319	0.875	6.8365	0.9	7.062	0.95	7.7455	111	4.8155	0.398889
72	0.05	3.8725	0.1	4.0895	0.125	4.182	0.2	4.4065	0.25	4.5365	0.5	5.1435	0.75	5.921	0.8	6.1475	0.875	6.6145	0.9	6.8295	0.95	7.4715	111	4.806	0.421813
73	0.05	4.0705	0.1	4.3	0.125	4.389	0.2	4.6225	0.25	4.756	0.5	5.3795	0.75	6.1625	0.8	6.3905	0.875	6.847	0.9	7.06	0.95	7.715	111	5.0595	0.409456
74	0.05	4.4795	0.1	4.737	0.125	4.8385	0.2	5.1035	0.25	5.2535	0.5	5.9595	0.75	6.8405	0.8	7.0855	0.875	7.5855	0.9	7.815	0.95	8.5185	111	5.6135	0.360775
75	0.05	5.129	0.1	5.448	0.125	5.57	0.2	5.886	0.25	6.073	0.5	6.955	0.75	8.048	0.8	8.356	0.875	8.98	0.9	9.26	0.95	10.107	111	6.476	0.289509
76	0.05	6.014	0.1	6.415	0.125	6.574	0.2	6.988	0.25	7.243	0.5	8.427	0.75	9.912	0.8	10.344	0.875	11.227	0.9	11.63	0.95	12.867	111	7.724	0.216968
77	0.05	7.07	0.1	7.597	0.125	7.822	0.2	8.378	0.25	8.719	0.5	10.369	0.75	12.52	0.8	13.138	0.875	14.447	0.9	15.078	0.95	16.974	111	9.196	0.155422
78	0.05	8.134	0.1	8.846	0.125	9.14	0.2	9.884	0.25	10.334	0.5	12.562	0.75	15.699	0.8	16.61	0.875	18.507	0.9	19.394	0.95	22.204	111	10.987	0.116322
79	0.05	9.013	0.1	9.904	0.125	10.266	0.2	11.195	0.25	11.754	0.5	14.571	0.75	18.813	0.8	20.038	0.875	22.571	0.9	23.777	0.95	27.478	111	12.452	0.0926632
80	0.05	9.5	0.1	10.48	0.125	10.88	0.2	11.925	0.25	12.545	0.5	15.795	0.75	20.835	0.8	22.29	0.875	25.32	0.9	26.805	0.95	31.28	111	13.15	0.0817078
81	0.05	9.42	0.1	10.375	0.125	10.76	0.2	11.785	0.25	12.43	0.5	15.72	0.75	20.87	0.8	22.39	0.875	25.73	0.9	27.185	0.95	31.95	111	13.215	0.0810724
82	0.05	8.725	0.1	9.565	0.125	9.91	0.2	10.845	0.25	11.4	0.5	14.32	0.75	18.905	0.8	20.345	0.875	23.34	0.9	24.745	0.95	29.07	111	11.77	0.0915998
83	0.05	7.549	0.1	8.297	0.125	8.58	0.2	9.335	0.25	9.791	0.5	12.119	0.75	15.733	0.8	16.833	0.875	19.189	0.9	20.304	0.95	23.752	111	10.258	0.115039
84	0.05	6.24	0.1	6.851	0.125	7.077	0.2	7.659	0.25	8.001	0.5	9.737	0.75	12.274	0.8	13.04	0.875	14.66	0.9	15.444	0.95	17.851	111	8.387	0.152146
85	0.05	5.117	0.1	5.544	0.125	5.719	0.2	6.152	0.25	6.398	0.5	7.622	0.75	9.281	0.8	9.782	0.875	10.815	0.9	11.32	0.95	12.877	111	6.732	0.210521
86	0.05	4.261	0.1	4.553	0.125	4.67	0.2	4.968	0.25	5.145	0.5	5.979	0.75	7.07	0.8	7.402	0.875	8.067	0.9	8.373	0.95	9.321	111	5.422	0.308132
87	0.05	3.656	0.1	3.8545	0.125	3.9335	0.2	4.136	0.25	4.257	0.5	4.8285	0.75	5.5935	0.8	5.816	0.875	6.268	0.9	6.4795	0.95	7.106	111	4.479	0.444892
88	0.05	3.235	0.1	3.382	0.125	3.44	0.2	3.586	0.25	3.676	0.5	4.102	0.75	4.6645	0.8	4.835	0.875	5.1725	0.9	5.333	0.95	5.811	111	3.8425	0.599601
89	0.05	2.9516	0.1	3.072	0.125	3.1206	0.2	3.2422	0.25	3.3171	0.5	3.6718	0.75	4.1549	0.8	4.2957	0.875	4.58	0.9	4.7181	0.95	5.1251	111	3.4546	0.723727
90	0.05	2.7891	0.1	2.8916	0.125	2.9342	0.2	3.0433	0.25	3.1113	0.5	3.4399	0.75	3.9119	0.8	4.0487	0.875	4.3303	0.9	4.4647	0.95	4.8729	111	3.2054	0.790854
91	0.05	2.726	0.1	2.8213	0.125	2.8595	0.2	2.9616	0.25	3.0242	0.5	3.351	0.75	3.856	0.8	4.012	0.875	4.3252	0.9	4.4822	0.95	4.9584	111	3.1152	0.824084
92	0.05	2.7499	0.1	2.8458	0.125	2.8839	0.2	2.9889	0.25	3.0512	0.5	3.3842	0.75	3.9456	0.8	4.1252	0.875	4.5304	0.9	4.7214	0.95	5.3393	111	3.1036	0.822948
93	0.05	2.8619	0.1	2.9687	0.125	3.0139	0.2	3.1285	0.25	3.1955	0.5	3.5557	0.75	4.1808	0.8	4.4021	0.875	4.9015	0.9	5.1345	0.95	5.9095	111	3.2508	0.762412
94	0.05	3.0752	0.1	3.2087	0.125	3.2624	0.2	3.4001	0.25	3.4802	0.5	3.9011	0.75	4.5981	0.8	4.84	0.875	5.3995	0.9	5.6748	0.95	6.5443	111	3.5395	0.629963
95	0.05	3.4122	0.1	3.5885	0.125	3.6578	0.2	3.8347	0.25	3.9413	0.5	4.464	0.75	5.2441	0.8	5.4964	0.875	6.0261	0.9	6.2876	0.95	7.0956	111	4.0871	0.494734
96	0.05	3.8895	0.1	4.1215	0.125	4.2125	0.2	4.451	0.25	4.5925	0.5	5.259	0.75	6.1355	0.8	6.3835	0.875	6.8965	0.9	7.127	0.95	7.8135	111	4.775	0.385152
97	0.05	4.46	0.1	4.762	0.125	4.879	0.2	5.174	0.25	5.348	0.5	6.184	0.75	7.229	0.8	7.536	0.875	8.167	0.9	8.456	0.95	9.346	111	5.714	0.304202
98	0.05	4.946	0.1	5.302	0.125	5.445	0.2	5.814	0.25	6.032	0.5	7.126	0.75	8.636	0.8	9.105	0.875	10.072	0.9	10.536	0.95	11.858	111	6.328	0.239601
99	0.05	5.143	0.1	5.578	0.125	5.757	0.2	6.234	0.25	6.53	0.5	8.099	0.75	10.309	0.8	10.955	0.875	12.278	0.9	12.875	0.95	14.732	111	6.645	0.170702
100	0.05	5.271	0.1	5.591	0.125	5.827	0.2	6.461	0.25	6.872	0.5	8.907	0.75	11.647	0.8	12.422	0.875	13.974	0.9	14.709	0.95	16.948	111	7.852	0.126169
101	0.05	5.536	0.1	5.536	0.125	5.758	0.2	6.554	0.25	7.039	0.5	9.256	0.75	12.143	0.8	12.948	0.875	14.553	0.9	15.31	0.95	17.638	111	8.462	0.116364
102	0.05	5.492	0.1	5.492	0.125	5.686	0.2	6.472	0.25	6.95	0.5	9.008	0.75	11.604	0.8	12.304	0.875	13.753	0.9	14.45	0.95	16.558	111	8.221	0.125438
103	0.05	5.206	0.1	5.393	0.125	5.615	0.2	6.232	0.25	6.59	0.5	8.223	0.75	10.247	0.8	10.81	0.875	11.962	0.9	12.509	0.95	14.185	111	7.646	0.157404
104	0.05	4.902	0.1	5.27	0.125	5.427	0.2	5.829	0.25	6.07	0.5	7.187	0.75	8.601	0.8	9.006	0.875	9.839	0.9	10.214	0.95	11.398	111	6.653	0.22915
105	0.05	4.619	0.1	4.894	0.125	4.998	0.2	5.271	0.25	5.427	0.5	6.189	0.75	7.167	0.8	7.451	0.875	8.03	0.9	8.298	0.95	9.115	111	5.701	0.337466
106	0.05	4.0465	0.1	4.268	0.125	4.353	0.2	4.5745	0.25	4.705	0.5	5.323	0.75	6.125	0.8	6.3615	0.875	6.8495	0.9	7.0785	0.95	7.786	111	4.9305	0.412639
107	0.05	3.516	0.1	3.6855	0.125	3.7515	0.2	3.9225	0.25	4.0255	0.5	4.5595	0.75	5.381	0.8	5.6475	0.875	6.226	0.9	6.508	0.95	7.392	111	4.1075	0.495135
108	0.05	3.1488	0.1	3.278	0.125	3.329	0.2	3.4639	0.25	3.5475	0.5	3.9792	0.75	4.7935	0.8	5.1352	0.875	5.9317	0.9	6.2916	0.95	7.3099	111	3.6203	0.625959
109	0.05	2.9191	0.1	3.0289	0.125	3.0716	0.2	3.184	0.25	3.2534	0.5	3.6174	0.75	4.3628	0.8	4.7401	0.875	5.6486	0.9	6.0354	0.95	6.6064	111	3.3118	0.740025
110	0.05	2.8033	0.1	2.8993	0.125	2.9399	0.2	3.0442	0.25	3.1058	0.5	3.4348	0.75	4.1033	0.8	4.4535	0.875	5.2974	0.9	5.6421	0.95	6.2401	111	3.1454	0.825519
111	0.05	2.7778	0.1	2.8717	0.125	2.9113	0.2	3.0151	0.25	3.0768	0.5	3.394	0.75	3.9994	0.8	4.2788	0.875	4.9267	0.9	5.2045	0.95	6.0018	111	3.1338	0.858124
112	0.05	2.8378	0.1	2.942	0.125	2.9833	0.2	3.0948	0.25	3.1595	0.5	3.4861	0.75	4.0369	0.8	4.2369	0.875	4.6646	0.9	4.8691	0.95	5.468	111	3.2265	0.812152
113	0.05	2.9946	0.1	3.1187	0.125	3.1665	0.2	3.2923	0.25	3.3627	0.5	3.7083	0.75	4.2019	0.8	4.3466	0.875	4.6544	0.9	4.7966	0.95	5.229	111	3.4594	0.743722
114	0.05	3.2634	0.1	3.4096	0.125	3.4667	0.2	3.6097	0.25	3.6943	0.5	4.0661	0.75	4.5561	0.8	4.6976	0.875	4.9794	0.9	5.1166	0.95	5.5329	111	3.8939	0.682861
115	0.05	3.5995	0.1	3.7785	0.125	3.8505	0.2	4.031	0.25	4.1385	0.5	4.624	0.75	5.2595	0.8	5.445	0.875	5.8275	0.9	6.0055	0.95	6.5815	111	4.4105	0.524155
116	0.05	3.9445	0.1	4.2055	0.125	4.3085	0.2	4.589	0.25	4.754	0.5	5.5395	0.75	6.497	0.8	6.7675	0.875	7.334	0.9	7.591	0.95	8.404	111	5.1075	0.323706
117	0.05	4.489	0.1	4.746	0.125	4.912	0.2	5.367	0.25	5.656	0.5	6.898	0.75	8.32	0.8	8.716	0.875	9.522	0.9	9.898	0.95	11.082	111	6.662	0.207683
118	0.05	5.332	0.1	5.572	0.125	5.81	0.2	6.482	0.25	6.888	0.5	8.642	0.75	10.664	0.8	11.23	0.875	12.376	0.9	12.936	0.95	14.576	111	8.285	0.147813
119	0.05	6.071	0.1	6.763	0.125	7.079	0.2	7.916	0.25	8.396	0.5	10.604	0.75	13.259	0.8	14.044	0.875	15.595	0.9	16.316	0.95	18.556	111	9.648	0.115206
120	0.05	7.368	0.1	8.221	0.125	8.561	0.2	9.447	0.25	9.97	0.5	12.459	0.75	15.64	0.8	16.593	0.875	18.554	0.9	19.427	0.95	22.199	111	10.937	0.10218
121	0.05	8.641	0.1	9.507	0.125	9.837	0.2	10.72	0.25	11.262	0.5	13.891	0.75	17.309	0.8	18.352	0.875	20.467	0.9	21.469	0.95	24.469	111	11.949	0.0978318
122	0.05	9.261	0.1	10.118	0.125	10.448	0.2	11.327	0.25	11.874	0.5	14.513	0.75	17.959	0.8	19.014	0.875	21.127	0.9	22.097	0.95	25.183	111	12.927	0.0966867
123	0.05	9.029	0.1	9.862	0.125	10.2	0.2	11.052	0.25	11.571	0.5	14.111	0.75	17.467	0.8	18.46	0.875	20.457	0.9	21.384	0.95	24.257	111	12.33	0.100891
124	0.05	8.233	0.1	8.982	0.125	9.277	0.2	10.045	0.25	10.5	0.5	12.796	0.75	15.903	0.8	16.842	0.875	18.711	0.9	19.571	0.95	22.135	111	10.957	0.112461
125	0.05	7.244	0.1	7.848	0.125	8.092	0.2	8.719	0.25	9.101	0.5	10.995	0.75	13.667	0.8	14.496	0.875	16.138	0.9	16.909	0.95	19.244	111	9.581	0.135671
126	0.05	6.3	0.1	6.775	0.125	6.965	0.2	7.449	0.25	7.74	0.5	9.208	0.75	11.312	0.8	11.975	0.875	13.313	0.9	13.962	0.95	15.989	111	8.118	0.176779
127	0.05	5.521	0.1	5.897	0.125	6.043	0.2	6.42	0.25	6.635	0.5	7.735	0.75	9.309	0.8	9.802	0.875	10.821	0.9	11.303	0.95	12.867	111	6.83	0.237702
128	0.05	4.935	0.1	5.236	0.125	5.356	0.2	5.656	0.25	5.829	0.5	6.664	0.75	7.822	0.8	8.183	0.875	8.925	0.9	9.277	0.95	10.389	111	6.13	0.309471
129	0.05	4.54	0.1	4.793	0.125	4.894	0.2	5.145	0.25	5.29	0.5	5.973	0.75	6.868	0.8	7.137	0.875	7.697	0.9	7.953	0.95	8.783	111	5.678	0.370658
130	0.05	4.322	0.1	4.547	0.125	4.64	0.2	4.864	0.25	4.994	0.5	5.605	0.75	6.369	0.8	6.593	0.875	7.055	0.9	7.283	0.95	8.023	111	5.334	0.417142
131	0.05	4.266	0.1	4.492	0.125	4.581	0.2	4.799	0.25	4.928	0.5	5.52	0.75	6.273	0.8	6.493	0.875	6.973	0.9	7.196	0.95	7.957	111	5.233	0.429532
132	0.05	4.384	0.1	4.628	0.125	4.726	0.2	4.961	0.25	5.098	0.5	5.736	0.75	6.581	0.8	6.841	0.875	7.388	0.9	7.665	0.95	8.538	111	5.388	0.395375
133	0.05	4.711	0.1	5	0.125	5.108	0.2	5.387	0.25	5.549	0.5	6.313	0.75	7.349	0.8	7.672	0.875	8.365	0.9	8.69	0.95	9.748	111	5.831	0.334596
134	0.05	5.296	0.1	5.661	0.125	5.801	0.2	6.156	0.25	6.364	0.5	7.349	0.75	8.699	0.8	9.105	0.875	9.964	0.9	10.376	0.95	11.686	111	6.698	0.259659
135	0.05	6.225	0.1	6.696	0.125	6.892	0.2	7.363	0.25	7.648	0.5	8.974	0.75	10.759	0.8	11.289	0.875	12.364	0.9	12.879	0.95	14.573	111	8.207	0.193041
136	0.05	7.536	0.1	8.19	0.125	8.447	0.2	9.1	0.25	9.484	0.5	11.294	0.75	13.651	0.8	14.354	0.875	15.794	0.9	16.494	0.95	18.634	111	10.216	0.141722
137	0.05	9.223	0.1	10.089	0.125	10.447	0.2	11.328	0.25	11.824	0.5	14.25	0.75	17.492	0.8	18.471	0.875	20.4	0.9	21.319	0.95	24.135	111	12.711	0.105683
138	0.05	11.011	0.1	12.148	0.125	12.592	0.2	13.748	0.25	14.417	0.5	17.7	0.75	22.068	0.8	23.364	0.875	26.096	0.9	27.349	0.95	31.206	111	15.426	0.0781212
139	0.05	12.4	0.1	13.875	0.125	14.45	0.2	15.935	0.25	16.845	0.5	21.16	0.75	26.905	0.8	28.625	0.875	32.33	0.9	34.035	0.95	38.945	111	18.445	0.0592492
140	0.05	13.055	0.1	14.83	0.125	15.55	0.2	17.435	0.25	18.555	0.5	23.965	0.75	31.075	0.8	33.315	0.875	37.86	0.9	39.9	0.95	46.09	111	20.445	0.047401
141	0.05	12.975	0.1	14.93	0.125	15.75	0.2	17.845	0.25	19.145	0.5	25.395	0.75	33.605	0.8	36.105	0.875	41.38	0.9	43.64	0.95	51	111	21.315	0.0408081
142	0.05	12.415	0.1	14.325	0.125	15.145	0.2	17.3	0.25	18.63	0.5	25.04	0.75	33.68	0.8	36.325	0.875	41.755	0.9	44.335	0.95	51.96	111	20.5	0.0398777
143	0.05	11.715	0.1	13.375	0.125	14.1	0.2	16.075	0.25	17.3	0.5	23.215	0.75	31.43	0.8	33.97	0.875	39.015	0.9	41.5	0.95	48.57	111	19.015	0.0446497
144	0.05	10.99	0.1	12.375	0.125	12.975	0.2	14.59	0.25	15.605	0.5	20.53	0.75	27.55	0.8	29.655	0.875	34.045	0.9	36.065	0.95	42.09	111	17.055	0.0528146
145	0.05	10.295	0.1	11.415	0.125	11.9	0.2	13.14	0.25	13.915	0.5	17.755	0.75	23.11	0.8	24.74	0.875	28.03	0.9	29.64	0.95	34.43	111	14.93	0.0677222
146	0.05	9.595	0.1	10.523	0.125	10.89	0.2	11.856	0.25	12.424	0.5	15.298	0.75	19.144	0.8	20.319	0.875	22.714	0.9	23.847	0.95	27.271	111	13.056	0.0902861
147	0.05	8.87	0.1	9.615	0.125	9.915	0.2	10.681	0.25	11.142	0.5	13.321	0.75	16.2	0.8	17.05	0.875	18.801	0.9	19.598	0.95	22.055	111	11.917	0.118202
148	0.05	8.084	0.1	8.723	0.125	8.974	0.2	9.616	0.25	10	0.5	11.817	0.75	14.238	0.8	14.967	0.875	16.446	0.9	17.13	0.95	19.255	111	10.708	0.14084
149	0.05	7.316	0.1	7.896	0.125	8.114	0.2	8.691	0.25	9.034	0.5	10.718	0.75	13.101	0.8	13.848	0.875	15.451	0.9	16.217	0.95	18.692	111	9.647	0.152417
150	0.05	6.732	0.1	7.248	0.125	7.449	0.2	7.997	0.25	8.337	0.5	10.04	0.75	12.728	0.8	13.609	0.875	15.487	0.9	16.371	0.95	19.191	111	8.74	0.153431
151	0.05	6.387	0.1	6.862	0.125	7.064	0.2	7.614	0.25	7.965	0.5	9.812	0.75	12.934	0.8	13.935	0.875	15.946	0.9	16.868	0.95	19.775	111	8.09	0.1438
152	0.05	6.296	0.1	6.788	0.125	6.99	0.2	7.578	0.25	7.98	0.5	10.047	0.75	13.398	0.8	14.402	0.875	16.426	0.9	17.354	0.95	20.105	111	7.278	0.1281
153	0.05	6.461	0.1	7.025	0.125	7.266	0.2	7.941	0.25	8.393	0.5	10.671	0.75	13.964	0.8	14.876	0.875	16.807	0.9	17.714	0.95	20.427	111	8.947	0.115451
154	0.05	6.926	0.1	7.606	0.125	7.897	0.2	8.67	0.25	9.155	0.5	11.517	0.75	14.576	0.8	15.441	0.875	17.307	0.9	18.207	0.95	20.97	111	9.867	0.108244
155	0.05	7.645	0.1	8.423	0.125	8.751	0.2	9.582	0.25	10.09	0.5	12.464	0.75	15.503	0.8	16.404	0.875	18.312	0.9	19.234	0.95	22.27	111	11.138	0.10761
156	0.05	8.272	0.1	9.161	0.125	9.508	0.2	10.44	0.25	10.989	0.5	13.564	0.75	16.981	0.8	18.011	0.875	20.203	0.9	21.288	0.95	24.716	111	12.3	0.0986956
157	0.05	8.428	0.1	9.537	0.125	9.977	0.2	11.133	0.25	11.813	0.5	14.903	0.75	19.047	0.8	20.351	0.875	23.037	0.9	24.387	0.95	28.435	111	13.29	0.0818388
158	0.05	8.299	0.1	9.554	0.125	10.094	0.2	11.534	0.25	12.387	0.5	16.392	0.75	21.669	0.8	23.252	0.875	26.546	0.9	28.067	0.95	32.983	111	13.425	0.0647424
