# Supplementary material for: Time-varying asymmetry and tail thickness in long series of daily financial returns
Source: publisher site journal article supplement (doi:10.1515/snde-2017-0071), 2018-10-02
Supplement: Supplementary file 385 [file thres_ucd.xlsx]

## Sheet: 1
	Var1	Var2	Var3	Var4	Var5	Var6	Var7	Var8	Var9	Var10	Var11	Var12	Var13	Var14	Var15	Var16	Var17	Var18	Var19	Var20	Var21	Var22	Var23	Var24	Var25
1	0	0	0	0	0	0	0	0	0	0	0	0	0	0	0	0	0	0	0	0	0	0	0	0	0
2	0.05	1.03735	0.1	1.0808	0.125	1.0969	0.2	1.1353	0.25	1.1564	0.5	1.24975	0.75	1.35735	0.8	1.38665	0.875	1.4428	0.9	1.4687	0.95	1.5402	111	1.2484	2.77604
3	0.05	1.0026	0.1	1.0428	0.125	1.05775	0.2	1.093	0.25	1.1131	0.5	1.19795	0.75	1.297	0.8	1.3243	0.875	1.3772	0.9	1.4007	0.95	1.4663	111	1.1886	3.05927
4	0.05	0.9716	0.1	1.00845	0.125	1.0219	0.2	1.05505	0.25	1.0733	0.5	1.15045	0.75	1.24165	0.8	1.2668	0.875	1.31605	0.9	1.3371	0.95	1.3966	111	1.1327	3.40734
5	0.05	0.94295	0.1	0.9772	0.125	0.9899	0.2	1.02085	0.25	1.03755	0.5	1.1081	0.75	1.1922	0.8	1.2157	0.875	1.2603	0.9	1.27905	0.95	1.3351	111	1.08705	3.70639
6	0.05	0.91765	0.1	0.9496	0.125	0.9613	0.2	0.99015	0.25	1.00595	0.5	1.071	0.75	1.1494	0.8	1.1709	0.875	1.2115	0.9	1.2292	0.95	1.2823	111	1.0507	4.01731
7	0.05	0.895	0.1	0.9253	0.125	0.9365	0.2	0.96315	0.25	0.97785	0.5	1.0396	0.75	1.1126	0.8	1.13235	0.875	1.17055	0.9	1.1867	0.95	1.23855	111	1.02165	4.18844
8	0.05	0.8755	0.1	0.90385	0.125	0.91495	0.2	0.9398	0.25	0.95385	0.5	1.01365	0.75	1.08215	0.8	1.1007	0.875	1.13665	0.9	1.15265	0.95	1.20365	111	0.99095	4.3071
9	0.05	0.85865	0.1	0.88595	0.125	0.8966	0.2	0.92055	0.25	0.9338	0.5	0.9925	0.75	1.05835	0.8	1.07585	0.875	1.1109	0.9	1.12705	0.95	1.17595	111	0.98285	4.40702
10	0.05	0.84485	0.1	0.87135	0.125	0.88145	0.2	0.9051	0.25	0.91805	0.5	0.97585	0.75	1.04025	0.8	1.05745	0.875	1.09205	0.9	1.10785	0.95	1.15615	111	0.9659	4.48432
11	0.05	0.83355	0.1	0.86035	0.125	0.86995	0.2	0.89325	0.25	0.9062	0.5	0.96355	0.75	1.02725	0.8	1.04495	0.875	1.0788	0.9	1.095	0.95	1.14265	111	0.94925	4.48931
12	0.05	0.82525	0.1	0.8523	0.125	0.86155	0.2	0.88495	0.25	0.898	0.5	0.9546	0.75	1.0188	0.8	1.03685	0.875	1.0708	0.9	1.0867	0.95	1.13385	111	0.94285	4.50167
13	0.05	0.82005	0.1	0.84715	0.125	0.85625	0.2	0.8793	0.25	0.8926	0.5	0.94915	0.75	1.01455	0.8	1.03175	0.875	1.0662	0.9	1.08155	0.95	1.1282	111	0.93095	4.54363
14	0.05	0.8169	0.1	0.84395	0.125	0.8535	0.2	0.8764	0.25	0.88965	0.5	0.9463	0.75	1.0124	0.8	1.0295	0.875	1.0642	0.9	1.07915	0.95	1.12485	111	0.92875	4.62386
15	0.05	0.81595	0.1	0.8427	0.125	0.8527	0.2	0.87555	0.25	0.8889	0.5	0.94565	0.75	1.0116	0.8	1.0288	0.875	1.06305	0.9	1.07795	0.95	1.123	111	0.93045	4.63415
16	0.05	0.81695	0.1	0.84325	0.125	0.8528	0.2	0.8764	0.25	0.88965	0.5	0.94625	0.75	1.01125	0.8	1.02835	0.875	1.0624	0.9	1.07695	0.95	1.12165	111	0.9302	4.59277
17	0.05	0.81905	0.1	0.8444	0.125	0.8541	0.2	0.8777	0.25	0.89105	0.5	0.9469	0.75	1.01045	0.8	1.0276	0.875	1.06055	0.9	1.07495	0.95	1.11965	111	0.92915	4.63307
18	0.05	0.8215	0.1	0.84555	0.125	0.8554	0.2	0.8788	0.25	0.89195	0.5	0.94675	0.75	1.00895	0.8	1.0254	0.875	1.0572	0.9	1.0716	0.95	1.11555	111	0.92955	4.74084
19	0.05	0.8228	0.1	0.8462	0.125	0.8557	0.2	0.87865	0.25	0.8915	0.5	0.94485	0.75	1.00545	0.8	1.0213	0.875	1.05225	0.9	1.06625	0.95	1.10955	111	0.92935	4.89114
20	0.05	0.82215	0.1	0.8452	0.125	0.8541	0.2	0.87655	0.25	0.88855	0.5	0.94045	0.75	0.99945	0.8	1.0148	0.875	1.0449	0.9	1.05845	0.95	1.10045	111	0.9293	5.079
21	0.05	0.8192	0.1	0.84105	0.125	0.8499	0.2	0.8712	0.25	0.88295	0.5	0.93325	0.75	0.99005	0.8	1.0055	0.875	1.03475	0.9	1.04815	0.95	1.088	111	0.92635	5.23534
22	0.05	0.81215	0.1	0.8337	0.125	0.84185	0.2	0.86245	0.25	0.87365	0.5	0.9224	0.75	0.9772	0.8	0.9929	0.875	1.02185	0.9	1.03445	0.95	1.07285	111	0.91165	5.35326
23	0.05	0.80085	0.1	0.82175	0.125	0.82985	0.2	0.8495	0.25	0.86065	0.5	0.9076	0.75	0.9611	0.8	0.97635	0.875	1.0055	0.9	1.0179	0.95	1.05525	111	0.8954	5.52584
24	0.05	0.7851	0.1	0.80555	0.125	0.8134	0.2	0.8326	0.25	0.84325	0.5	0.8889	0.75	0.942	0.8	0.95675	0.875	0.9855	0.9	0.99805	0.95	1.0344	111	0.8767	5.66849
25	0.05	0.7648	0.1	0.78525	0.125	0.79305	0.2	0.81155	0.25	0.82185	0.5	0.86655	0.75	0.919	0.8	0.93355	0.875	0.9623	0.9	0.9741	0.95	1.01015	111	0.8523	5.85378
26	0.05	0.7406	0.1	0.76155	0.125	0.769	0.2	0.7871	0.25	0.79705	0.5	0.84115	0.75	0.8926	0.8	0.90715	0.875	0.9355	0.9	0.9476	0.95	0.98195	111	0.8285	5.82062
27	0.05	0.7139	0.1	0.73485	0.125	0.7421	0.2	0.75975	0.25	0.7695	0.5	0.8129	0.75	0.86355	0.8	0.87785	0.875	0.9058	0.9	0.9177	0.95	0.95145	111	0.809	5.94961
28	0.05	0.68565	0.1	0.70625	0.125	0.71305	0.2	0.73045	0.25	0.73985	0.5	0.78255	0.75	0.8321	0.8	0.84615	0.875	0.87325	0.9	0.88475	0.95	0.9181	111	0.7735	6.02074
29	0.05	0.65677	0.1	0.6765	0.125	0.68336	0.2	0.69996	0.25	0.70929	0.5	0.75087	0.75	0.79908	0.8	0.81287	0.875	0.8387	0.9	0.84995	0.95	0.88277	111	0.73952	6.19544
30	0.05	0.62786	0.1	0.6468	0.125	0.65356	0.2	0.66947	0.25	0.67847	0.5	0.7185	0.75	0.76503	0.8	0.7781	0.875	0.80288	0.9	0.81368	0.95	0.84584	111	0.70531	6.43993
31	0.05	0.59976	0.1	0.61778	0.125	0.62428	0.2	0.63955	0.25	0.64829	0.5	0.68639	0.75	0.73089	0.8	0.74328	0.875	0.76659	0.9	0.77711	0.95	0.80829	111	0.66735	6.79502
32	0.05	0.57319	0.1	0.59042	0.125	0.59643	0.2	0.6111	0.25	0.61938	0.5	0.65528	0.75	0.6973	0.8	0.70892	0.875	0.73094	0.9	0.74067	0.95	0.77085	111	0.64261	7.17192
33	0.05	0.54855	0.1	0.56483	0.125	0.57055	0.2	0.58453	0.25	0.59225	0.5	0.62567	0.75	0.66515	0.8	0.67606	0.875	0.69682	0.9	0.7059	0.95	0.73449	111	0.61475	7.69353
34	0.05	0.52658	0.1	0.54157	0.125	0.54715	0.2	0.56019	0.25	0.56745	0.5	0.59866	0.75	0.63533	0.8	0.64547	0.875	0.66462	0.9	0.67329	0.95	0.6996	111	0.58872	8.25385
35	0.05	0.50701	0.1	0.52109	0.125	0.52627	0.2	0.53857	0.25	0.54535	0.5	0.5745	0.75	0.60824	0.8	0.61771	0.875	0.63552	0.9	0.64353	0.95	0.66748	111	0.56553	8.82791
36	0.05	0.49005	0.1	0.50331	0.125	0.50818	0.2	0.51967	0.25	0.52596	0.5	0.55336	0.75	0.58439	0.8	0.59324	0.875	0.60973	0.9	0.61729	0.95	0.63914	111	0.5463	9.44082
37	0.05	0.4759	0.1	0.48838	0.125	0.4929	0.2	0.50366	0.25	0.5097	0.5	0.53543	0.75	0.56425	0.8	0.57232	0.875	0.58806	0.9	0.59506	0.95	0.61497	111	0.52905	10.0981
38	0.05	0.46459	0.1	0.47628	0.125	0.48053	0.2	0.49077	0.25	0.4966	0.5	0.52101	0.75	0.54821	0.8	0.55553	0.875	0.57056	0.9	0.57691	0.95	0.59534	111	0.51576	10.6109
39	0.05	0.45593	0.1	0.46694	0.125	0.47111	0.2	0.48113	0.25	0.48662	0.5	0.51024	0.75	0.53626	0.8	0.54326	0.875	0.55717	0.9	0.56356	0.95	0.58105	111	0.50614	10.9939
40	0.05	0.4498	0.1	0.46075	0.125	0.46476	0.2	0.47445	0.25	0.48	0.5	0.50312	0.75	0.52847	0.8	0.53533	0.875	0.54885	0.9	0.55477	0.95	0.57167	111	0.50088	11.1346
41	0.05	0.44674	0.1	0.45762	0.125	0.46145	0.2	0.47122	0.25	0.47653	0.5	0.49976	0.75	0.52489	0.8	0.53171	0.875	0.54516	0.9	0.55105	0.95	0.56731	111	0.48757	10.9563
42	0.05	0.44666	0.1	0.4574	0.125	0.46145	0.2	0.47123	0.25	0.47644	0.5	0.50007	0.75	0.52556	0.8	0.53267	0.875	0.5459	0.9	0.55188	0.95	0.56806	111	0.50663	10.7711
43	0.05	0.44964	0.1	0.46055	0.125	0.46472	0.2	0.4746	0.25	0.47993	0.5	0.50411	0.75	0.53037	0.8	0.53762	0.875	0.55134	0.9	0.55703	0.95	0.57415	111	0.50117	10.4963
44	0.05	0.45563	0.1	0.46709	0.125	0.47126	0.2	0.48142	0.25	0.48703	0.5	0.51201	0.75	0.53924	0.8	0.54675	0.875	0.56102	0.9	0.56695	0.95	0.58466	111	0.50533	10.2656
45	0.05	0.46511	0.1	0.47705	0.125	0.48124	0.2	0.49193	0.25	0.49778	0.5	0.52354	0.75	0.55223	0.8	0.55997	0.875	0.5747	0.9	0.58093	0.95	0.59899	111	0.51685	10.0065
46	0.05	0.47779	0.1	0.49039	0.125	0.49481	0.2	0.50612	0.25	0.5122	0.5	0.5389	0.75	0.56893	0.8	0.57697	0.875	0.5923	0.9	0.59885	0.95	0.6177	111	0.53173	9.68986
47	0.05	0.49417	0.1	0.50724	0.125	0.51187	0.2	0.52374	0.25	0.5303	0.5	0.55792	0.75	0.58924	0.8	0.59773	0.875	0.61357	0.9	0.62033	0.95	0.64025	111	0.55064	9.37533
48	0.05	0.51373	0.1	0.52759	0.125	0.53247	0.2	0.54487	0.25	0.55177	0.5	0.58033	0.75	0.61287	0.8	0.62173	0.875	0.6381	0.9	0.64524	0.95	0.66596	111	0.57363	9.06607
49	0.05	0.53648	0.1	0.55112	0.125	0.55639	0.2	0.56915	0.25	0.57626	0.5	0.60593	0.75	0.6395	0.8	0.64875	0.875	0.66553	0.9	0.67293	0.95	0.69441	111	0.59945	8.74971
50	0.05	0.56234	0.1	0.57759	0.125	0.58319	0.2	0.59626	0.25	0.60359	0.5	0.63432	0.75	0.66876	0.8	0.67808	0.875	0.69539	0.9	0.70312	0.95	0.72542	111	0.62849	8.48124
51	0.05	0.59065	0.1	0.6063	0.125	0.61219	0.2	0.62581	0.25	0.63325	0.5	0.66503	0.75	0.70004	0.8	0.70948	0.875	0.72725	0.9	0.73519	0.95	0.75837	111	0.65971	8.24773
52	0.05	0.62087	0.1	0.63667	0.125	0.64278	0.2	0.65687	0.25	0.66462	0.5	0.69718	0.75	0.73285	0.8	0.7423	0.875	0.76075	0.9	0.76876	0.95	0.79236	111	0.69167	8.03647
53	0.05	0.65207	0.1	0.66825	0.125	0.67425	0.2	0.68876	0.25	0.69675	0.5	0.73006	0.75	0.76634	0.8	0.77606	0.875	0.7948	0.9	0.80311	0.95	0.82681	111	0.72497	7.88237
54	0.05	0.68303	0.1	0.6996	0.125	0.70575	0.2	0.72049	0.25	0.72879	0.5	0.76304	0.75	0.80006	0.8	0.80996	0.875	0.82887	0.9	0.83733	0.95	0.86215	111	0.75862	7.69705
55	0.05	0.71275	0.1	0.72976	0.125	0.73598	0.2	0.75136	0.25	0.75955	0.5	0.79484	0.75	0.83285	0.8	0.84308	0.875	0.86248	0.9	0.87118	0.95	0.89691	111	0.79038	7.43504
56	0.05	0.7403	0.1	0.75753	0.125	0.76398	0.2	0.77979	0.25	0.78827	0.5	0.82471	0.75	0.86403	0.8	0.87455	0.875	0.89447	0.9	0.90347	0.95	0.93039	111	0.81908	7.17875
57	0.05	0.76415	0.1	0.78207	0.125	0.78878	0.2	0.80507	0.25	0.81405	0.5	0.85164	0.75	0.89253	0.8	0.90321	0.875	0.92406	0.9	0.9335	0.95	0.96147	111	0.84503	6.93237
58	0.05	0.78335	0.1	0.80245	0.125	0.80929	0.2	0.82641	0.25	0.83578	0.5	0.87471	0.75	0.91752	0.8	0.92874	0.875	0.95064	0.9	0.96084	0.95	0.99016	111	0.86507	6.69479
59	0.05	0.79804	0.1	0.81807	0.125	0.82553	0.2	0.84341	0.25	0.85303	0.5	0.89351	0.75	0.9384	0.8	0.95005	0.875	0.97312	0.9	0.98376	0.95	1.0152	111	0.88471	6.42232
60	0.05	0.80785	0.1	0.82891	0.125	0.83686	0.2	0.85544	0.25	0.8655	0.5	0.90753	0.75	0.95469	0.8	0.96663	0.875	0.9908	0.9	1.0018	0.95	1.0351	111	0.89995	6.21248
61	0.05	0.81357	0.1	0.83531	0.125	0.84346	0.2	0.8627	0.25	0.87303	0.5	0.91672	0.75	0.96556	0.8	0.97849	0.875	1.00334	0.9	1.01484	0.95	1.04974	111	0.911	6.0079
62	0.05	0.81485	0.1	0.8374	0.125	0.84565	0.2	0.86517	0.25	0.87586	0.5	0.92084	0.75	0.97141	0.8	0.98474	0.875	1.01037	0.9	1.02224	0.95	1.05856	111	0.91365	5.83986
63	0.05	0.8125	0.1	0.83555	0.125	0.84395	0.2	0.8637	0.25	0.8745	0.5	0.9204	0.75	0.9722	0.8	0.98595	0.875	1.01215	0.9	1.02445	0.95	1.0619	111	0.9123	5.72286
64	0.05	0.8072	0.1	0.83045	0.125	0.83895	0.2	0.85875	0.25	0.8697	0.5	0.91605	0.75	0.9685	0.8	0.9826	0.875	1.00925	0.9	1.0219	0.95	1.0595	111	0.9066	5.66065
65	0.05	0.7996	0.1	0.8229	0.125	0.8313	0.2	0.85105	0.25	0.8622	0.5	0.9085	0.75	0.9611	0.8	0.97525	0.875	1.00225	0.9	1.01465	0.95	1.05265	111	0.89915	5.62932
66	0.05	0.7907	0.1	0.8137	0.125	0.822	0.2	0.84155	0.25	0.8526	0.5	0.89885	0.75	0.9509	0.8	0.965	0.875	0.9922	0.9	1.00425	0.95	1.0421	111	0.889	5.63315
67	0.05	0.78125	0.1	0.80375	0.125	0.8119	0.2	0.83105	0.25	0.84185	0.5	0.8876	0.75	0.939	0.8	0.95295	0.875	0.98	0.9	0.9917	0.95	1.0292	111	0.87735	5.66911
68	0.05	0.77155	0.1	0.7937	0.125	0.80155	0.2	0.8204	0.25	0.83105	0.5	0.8759	0.75	0.9266	0.8	0.9402	0.875	0.9666	0.9	0.9783	0.95	1.01465	111	0.8647	5.74436
69	0.05	0.7628	0.1	0.7841	0.125	0.79185	0.2	0.81015	0.25	0.8206	0.5	0.86475	0.75	0.9145	0.8	0.9279	0.875	0.95385	0.9	0.96535	0.95	1.0003	111	0.85205	5.85229
70	0.05	0.75522	0.1	0.77588	0.125	0.7835	0.2	0.80143	0.25	0.81155	0.5	0.85488	0.75	0.90391	0.8	0.91692	0.875	0.94228	0.9	0.95345	0.95	0.9878	111	0.84362	5.95641
71	0.05	0.74883	0.1	0.76938	0.125	0.77668	0.2	0.79456	0.25	0.80451	0.5	0.84708	0.75	0.89548	0.8	0.90813	0.875	0.93312	0.9	0.94403	0.95	0.9781	111	0.83661	6.03718
72	0.05	0.74451	0.1	0.765	0.125	0.77263	0.2	0.79015	0.25	0.7999	0.5	0.84206	0.75	0.88979	0.8	0.90245	0.875	0.92706	0.9	0.93792	0.95	0.97167	111	0.83148	6.09626
73	0.05	0.74256	0.1	0.76355	0.125	0.77099	0.2	0.78872	0.25	0.7983	0.5	0.84033	0.75	0.88767	0.8	0.90013	0.875	0.92504	0.9	0.93561	0.95	0.96939	111	0.82842	6.12271
74	0.05	0.74408	0.1	0.76501	0.125	0.77271	0.2	0.7905	0.25	0.80021	0.5	0.84236	0.75	0.88967	0.8	0.90225	0.875	0.9272	0.9	0.93794	0.95	0.97193	111	0.82805	6.08381
75	0.05	0.74915	0.1	0.77013	0.125	0.77786	0.2	0.7959	0.25	0.80578	0.5	0.84839	0.75	0.8962	0.8	0.90883	0.875	0.9341	0.9	0.94515	0.95	0.97935	111	0.83384	5.98256
76	0.05	0.75786	0.1	0.77887	0.125	0.78683	0.2	0.80512	0.25	0.81508	0.5	0.85883	0.75	0.90762	0.8	0.92036	0.875	0.94549	0.9	0.95734	0.95	0.99248	111	0.84629	5.86506
77	0.05	0.77031	0.1	0.79153	0.125	0.79961	0.2	0.81837	0.25	0.82866	0.5	0.87362	0.75	0.92373	0.8	0.93648	0.875	0.96232	0.9	0.97474	0.95	1.01121	111	0.85985	5.7152
78	0.05	0.78672	0.1	0.80839	0.125	0.8164	0.2	0.83591	0.25	0.84666	0.5	0.89299	0.75	0.94481	0.8	0.95794	0.875	0.98462	0.9	0.99698	0.95	1.03495	111	0.87986	5.56111
79	0.05	0.80723	0.1	0.82926	0.125	0.83748	0.2	0.85757	0.25	0.86883	0.5	0.91684	0.75	0.97058	0.8	0.98442	0.875	1.01183	0.9	1.02466	0.95	1.06388	111	0.90197	5.37279
80	0.05	0.83153	0.1	0.8541	0.125	0.86244	0.2	0.88337	0.25	0.89509	0.5	0.94498	0.75	1.00095	0.8	1.01549	0.875	1.0438	0.9	1.05752	0.95	1.09824	111	0.92973	5.17074
81	0.05	0.85952	0.1	0.88252	0.125	0.89119	0.2	0.91294	0.25	0.92511	0.5	0.97713	0.75	1.03544	0.8	1.05038	0.875	1.08012	0.9	1.09438	0.95	1.13704	111	0.96368	4.96167
82	0.05	0.89053	0.1	0.91441	0.125	0.92333	0.2	0.9458	0.25	0.95833	0.5	1.01265	0.75	1.07366	0.8	1.08932	0.875	1.12025	0.9	1.13471	0.95	1.1794	111	1.00088	4.76463
83	0.05	0.92385	0.1	0.94875	0.125	0.95835	0.2	0.98115	0.25	0.99425	0.5	1.05105	0.75	1.11445	0.8	1.13085	0.875	1.16335	0.9	1.1783	0.95	1.2254	111	1.0396	4.56562
84	0.05	0.959	0.1	0.98475	0.125	0.9947	0.2	1.01825	0.25	1.03195	0.5	1.0911	0.75	1.15705	0.8	1.17435	0.875	1.20865	0.9	1.2242	0.95	1.2729	111	1.0799	4.37343
85	0.05	0.9947	0.1	1.02155	0.125	1.0317	0.2	1.05625	0.25	1.07045	0.5	1.13195	0.75	1.20035	0.8	1.21855	0.875	1.25435	0.9	1.27095	0.95	1.32095	111	1.11955	4.18607
86	0.05	1.0292	0.1	1.05735	0.125	1.0677	0.2	1.09365	0.25	1.1083	0.5	1.17215	0.75	1.2429	0.8	1.2621	0.875	1.29965	0.9	1.31705	0.95	1.36805	111	1.15785	4.02187
87	0.05	1.0618	0.1	1.09125	0.125	1.10205	0.2	1.12905	0.25	1.14405	0.5	1.21035	0.75	1.2837	0.8	1.3033	0.875	1.3423	0.9	1.36015	0.95	1.4134	111	1.19305	3.8845
88	0.05	1.09065	0.1	1.1218	0.125	1.13255	0.2	1.1606	0.25	1.1764	0.5	1.24485	0.75	1.3209	0.8	1.34115	0.875	1.3811	0.9	1.3997	0.95	1.45505	111	1.2208	3.78888
89	0.05	1.11505	0.1	1.14675	0.125	1.15835	0.2	1.1874	0.25	1.2038	0.5	1.2743	0.75	1.3529	0.8	1.37355	0.875	1.4147	0.9	1.4341	0.95	1.4916	111	1.2508	3.69156
90	0.05	1.1334	0.1	1.16565	0.125	1.1779	0.2	1.2078	0.25	1.2251	0.5	1.29715	0.75	1.378	0.8	1.399	0.875	1.44145	0.9	1.4617	0.95	1.52185	111	1.2785	3.58002
91	0.05	1.1452	0.1	1.1779	0.125	1.19025	0.2	1.2211	0.25	1.2387	0.5	1.31265	0.75	1.39495	0.8	1.41705	0.875	1.46075	0.9	1.4811	0.95	1.54385	111	1.2956	3.48894
92	0.05	1.1488	0.1	1.18245	0.125	1.1952	0.2	1.22665	0.25	1.2443	0.5	1.3197	0.75	1.40345	0.8	1.42605	0.875	1.47055	0.9	1.49105	0.95	1.55595	111	1.3107	3.43612
93	0.05	1.1448	0.1	1.17945	0.125	1.19195	0.2	1.2237	0.25	1.24175	0.5	1.31835	0.75	1.403	0.8	1.426	0.875	1.47105	0.9	1.49155	0.95	1.5585	111	1.30435	3.35557
94	0.05	1.13335	0.1	1.1685	0.125	1.1812	0.2	1.2127	0.25	1.23085	0.5	1.30795	0.75	1.3932	0.8	1.4166	0.875	1.4617	0.9	1.48265	0.95	1.5494	111	1.28875	3.3308
95	0.05	1.11515	0.1	1.15045	0.125	1.163	0.2	1.19425	0.25	1.21225	0.5	1.2892	0.75	1.3747	0.8	1.3981	0.875	1.4432	0.9	1.46415	0.95	1.53135	111	1.26805	3.34192
96	0.05	1.09105	0.1	1.1259	0.125	1.13855	0.2	1.16965	0.25	1.1871	0.5	1.2632	0.75	1.3483	0.8	1.37095	0.875	1.41655	0.9	1.43755	0.95	1.50325	111	1.2414	3.37714
97	0.05	1.06245	0.1	1.09625	0.125	1.1087	0.2	1.1394	0.25	1.1564	0.5	1.23105	0.75	1.3149	0.8	1.33735	0.875	1.3831	0.9	1.4033	0.95	1.4675	111	1.2097	3.4358
98	0.05	1.0298	0.1	1.06305	0.125	1.0751	0.2	1.10475	0.25	1.12145	0.5	1.1944	0.75	1.2765	0.8	1.29865	0.875	1.34335	0.9	1.3632	0.95	1.4258	111	1.17415	3.52143
99	0.05	0.99495	0.1	1.02735	0.125	1.039	0.2	1.0674	0.25	1.0836	0.5	1.1543	0.75	1.23435	0.8	1.2563	0.875	1.29945	0.9	1.3189	0.95	1.37945	111	1.13485	3.63682
100	0.05	0.9592	0.1	0.99045	0.125	1.0016	0.2	1.02885	0.25	1.04445	0.5	1.11255	0.75	1.19035	0.8	1.21155	0.875	1.25335	0.9	1.27265	0.95	1.33105	111	1.09315	3.78303
101	0.05	0.92385	0.1	0.9536	0.125	0.96425	0.2	0.99025	0.25	1.00525	0.5	1.0706	0.75	1.14595	0.8	1.16655	0.875	1.2067	0.9	1.22515	0.95	1.28145	111	1.0512	3.94028
102	0.05	0.8895	0.1	0.91785	0.125	0.9282	0.2	0.953	0.25	0.9674	0.5	1.0299	0.75	1.1026	0.8	1.1222	0.875	1.161	0.9	1.17885	0.95	1.2328	111	1.01	4.10488
103	0.05	0.8572	0.1	0.8843	0.125	0.89435	0.2	0.91785	0.25	0.93155	0.5	0.9916	0.75	1.06155	0.8	1.0804	0.875	1.11785	0.9	1.13485	0.95	1.18665	111	0.97145	4.27676
104	0.05	0.8278	0.1	0.8541	0.125	0.8632	0.2	0.88585	0.25	0.89875	0.5	0.9563	0.75	1.02355	0.8	1.04205	0.875	1.07805	0.9	1.094	0.95	1.14405	111	0.93695	4.45127
105	0.05	0.8018	0.1	0.82695	0.125	0.83565	0.2	0.85725	0.25	0.8697	0.5	0.92485	0.75	0.98955	0.8	1.00765	0.875	1.04215	0.9	1.0582	0.95	1.10655	111	0.90465	4.63413
106	0.05	0.7796	0.1	0.8035	0.125	0.812	0.2	0.8328	0.25	0.84475	0.5	0.8978	0.75	0.96045	0.8	0.97765	0.875	1.01135	0.9	1.0272	0.95	1.07325	111	0.876	4.82767
107	0.05	0.7612	0.1	0.78445	0.125	0.7926	0.2	0.8128	0.25	0.82445	0.5	0.8755	0.75	0.93645	0.8	0.95305	0.875	0.9864	0.9	1.00175	0.95	1.0461	111	0.85505	5.0357
108	0.05	0.74705	0.1	0.7697	0.125	0.7777	0.2	0.79735	0.25	0.80855	0.5	0.8583	0.75	0.91785	0.8	0.93375	0.875	0.9669	0.9	0.9821	0.95	1.0255	111	0.84075	5.17384
109	0.05	0.73709	0.1	0.75945	0.125	0.76727	0.2	0.78648	0.25	0.7974	0.5	0.84638	0.75	0.90473	0.8	0.92065	0.875	0.95308	0.9	0.96834	0.95	1.01112	111	0.83601	5.20842
110	0.05	0.73153	0.1	0.75348	0.125	0.76129	0.2	0.78022	0.25	0.79094	0.5	0.83971	0.75	0.89714	0.8	0.91291	0.875	0.94471	0.9	0.96017	0.95	1.00283	111	0.81809	5.24047
111	0.05	0.73042	0.1	0.75183	0.125	0.75967	0.2	0.77854	0.25	0.7892	0.5	0.83791	0.75	0.89489	0.8	0.91076	0.875	0.94253	0.9	0.95755	0.95	1.00031	111	0.81939	5.32832
112	0.05	0.7329	0.1	0.75415	0.125	0.76205	0.2	0.7812	0.25	0.79195	0.5	0.8406	0.75	0.89815	0.8	0.91405	0.875	0.9461	0.9	0.9606	0.95	1.0034	111	0.8215	5.25998
113	0.05	0.7392	0.1	0.76035	0.125	0.76855	0.2	0.78795	0.25	0.79885	0.5	0.848	0.75	0.9064	0.8	0.9221	0.875	0.9545	0.9	0.969	0.95	1.0124	111	0.8263	5.19537
114	0.05	0.7488	0.1	0.77045	0.125	0.7787	0.2	0.79855	0.25	0.8099	0.5	0.85985	0.75	0.9191	0.8	0.9355	0.875	0.9678	0.9	0.98225	0.95	1.02565	111	0.83025	5.14012
115	0.05	0.7615	0.1	0.78395	0.125	0.7922	0.2	0.8126	0.25	0.8241	0.5	0.8752	0.75	0.936	0.8	0.95285	0.875	0.98545	0.9	0.99985	0.95	1.04365	111	0.84035	5.11861
116	0.05	0.77715	0.1	0.79985	0.125	0.8084	0.2	0.82945	0.25	0.8413	0.5	0.8936	0.75	0.95625	0.8	0.97325	0.875	1.00605	0.9	1.021	0.95	1.06495	111	0.8636	4.89312
117	0.05	0.7945	0.1	0.8183	0.125	0.827	0.2	0.84845	0.25	0.8606	0.5	0.9144	0.75	0.979	0.8	0.99645	0.875	1.02975	0.9	1.04485	0.95	1.0893	111	0.88575	4.73494
118	0.05	0.8135	0.1	0.838	0.125	0.8472	0.2	0.8688	0.25	0.8814	0.5	0.9369	0.75	1.00335	0.8	1.0211	0.875	1.055	0.9	1.07045	0.95	1.11595	111	0.9075	4.59019
119	0.05	0.83345	0.1	0.85845	0.125	0.8678	0.2	0.8899	0.25	0.9029	0.5	0.96	0.75	1.02825	0.8	1.04625	0.875	1.0809	0.9	1.0966	0.95	1.1435	111	0.9238	4.50014
120	0.05	0.8529	0.1	0.8783	0.125	0.88815	0.2	0.9107	0.25	0.92375	0.5	0.9826	0.75	1.0525	0.8	1.0709	0.875	1.10645	0.9	1.12235	0.95	1.17045	111	0.95155	4.33409
121	0.05	0.8708	0.1	0.89705	0.125	0.90695	0.2	0.93015	0.25	0.9433	0.5	1.00365	0.75	1.07485	0.8	1.09375	0.875	1.13025	0.9	1.1461	0.95	1.1952	111	0.9735	4.23075
122	0.05	0.88645	0.1	0.91325	0.125	0.92335	0.2	0.9471	0.25	0.9603	0.5	1.0216	0.75	1.0943	0.8	1.1134	0.875	1.1507	0.9	1.1666	0.95	1.2168	111	0.9925	4.1624
123	0.05	0.8989	0.1	0.92605	0.125	0.93635	0.2	0.9606	0.25	0.9741	0.5	1.036	0.75	1.10975	0.8	1.1289	0.875	1.16685	0.9	1.1835	0.95	1.2335	111	1.0065	4.13267
124	0.05	0.90705	0.1	0.9347	0.125	0.9451	0.2	0.9697	0.25	0.98345	0.5	1.04545	0.75	1.1198	0.8	1.1395	0.875	1.17725	0.9	1.1943	0.95	1.2445	111	1.0146	4.11392
125	0.05	0.9104	0.1	0.93835	0.125	0.94875	0.2	0.97385	0.25	0.9876	0.5	1.04955	0.75	1.1242	0.8	1.1436	0.875	1.18175	0.9	1.1989	0.95	1.24855	111	1.0154	4.12327
126	0.05	0.9081	0.1	0.9364	0.125	0.94705	0.2	0.97225	0.25	0.986	0.5	1.0477	0.75	1.12195	0.8	1.14175	0.875	1.17935	0.9	1.19655	0.95	1.2464	111	1.0131	4.14158
127	0.05	0.9006	0.1	0.9292	0.125	0.9393	0.2	0.96475	0.25	0.9784	0.5	1.0399	0.75	1.1133	0.8	1.133	0.875	1.16985	0.9	1.1865	0.95	1.2357	111	1.00755	4.16474
128	0.05	0.88775	0.1	0.91615	0.125	0.92635	0.2	0.9516	0.25	0.96515	0.5	1.0261	0.75	1.0982	0.8	1.11745	0.875	1.15365	0.9	1.16945	0.95	1.2174	111	0.99555	4.19954
129	0.05	0.87	0.1	0.8981	0.125	0.90835	0.2	0.93325	0.25	0.94675	0.5	1.00665	0.75	1.07705	0.8	1.0953	0.875	1.1309	0.9	1.14605	0.95	1.19225	111	0.97725	4.25511
130	0.05	0.84855	0.1	0.87555	0.125	0.8857	0.2	0.9103	0.25	0.92365	0.5	0.9825	0.75	1.05025	0.8	1.06765	0.875	1.10195	0.9	1.11705	0.95	1.1609	111	0.94915	4.36301
131	0.05	0.82355	0.1	0.84975	0.125	0.8599	0.2	0.8839	0.25	0.8968	0.5	0.954	0.75	1.01905	0.8	1.03595	0.875	1.06845	0.9	1.0833	0.95	1.12455	111	0.92865	4.46805
132	0.05	0.7962	0.1	0.82185	0.125	0.8316	0.2	0.85475	0.25	0.8672	0.5	0.92255	0.75	0.98475	0.8	1.00055	0.875	1.0316	0.9	1.0455	0.95	1.08535	111	0.903	4.63122
133	0.05	0.76785	0.1	0.7926	0.125	0.8018	0.2	0.824	0.25	0.83605	0.5	0.88905	0.75	0.94805	0.8	0.963	0.875	0.9926	0.9	1.0053	0.95	1.0438	111	0.87585	4.84562
134	0.05	0.73954	0.1	0.76311	0.125	0.77195	0.2	0.79286	0.25	0.80436	0.5	0.8549	0.75	0.91048	0.8	0.92482	0.875	0.95227	0.9	0.96472	0.95	1.00102	111	0.84383	5.108
135	0.05	0.71151	0.1	0.73421	0.125	0.74246	0.2	0.7622	0.25	0.77305	0.5	0.82091	0.75	0.87287	0.8	0.88648	0.875	0.91236	0.9	0.92396	0.95	0.95814	111	0.8114	5.41346
136	0.05	0.68538	0.1	0.70659	0.125	0.71422	0.2	0.73287	0.25	0.74325	0.5	0.78796	0.75	0.8365	0.8	0.84942	0.875	0.87377	0.9	0.88458	0.95	0.91631	111	0.77946	5.78114
137	0.05	0.66121	0.1	0.68096	0.125	0.6881	0.2	0.70582	0.25	0.71537	0.5	0.7571	0.75	0.80253	0.8	0.81465	0.875	0.83736	0.9	0.84757	0.95	0.87725	111	0.74941	6.20623
138	0.05	0.63927	0.1	0.65775	0.125	0.66449	0.2	0.68104	0.25	0.69021	0.5	0.729	0.75	0.77148	0.8	0.78257	0.875	0.80402	0.9	0.81345	0.95	0.84103	111	0.72158	6.66296
139	0.05	0.61988	0.1	0.6374	0.125	0.64379	0.2	0.65929	0.25	0.66784	0.5	0.70409	0.75	0.74364	0.8	0.75406	0.875	0.77425	0.9	0.78311	0.95	0.80854	111	0.69719	7.12944
140	0.05	0.60359	0.1	0.62013	0.125	0.62596	0.2	0.64063	0.25	0.64858	0.5	0.68284	0.75	0.71991	0.8	0.72958	0.875	0.74868	0.9	0.75679	0.95	0.7801	111	0.67664	7.60008
141	0.05	0.58991	0.1	0.60558	0.125	0.6115	0.2	0.6252	0.25	0.63293	0.5	0.66556	0.75	0.7004	0.8	0.70956	0.875	0.72733	0.9	0.73504	0.95	0.75678	111	0.66058	8.02121
142	0.05	0.57899	0.1	0.59437	0.125	0.59977	0.2	0.61327	0.25	0.62078	0.5	0.65218	0.75	0.68538	0.8	0.69429	0.875	0.71092	0.9	0.71821	0.95	0.73905	111	0.65206	8.34052
143	0.05	0.57105	0.1	0.5858	0.125	0.59124	0.2	0.60459	0.25	0.612	0.5	0.64264	0.75	0.67495	0.8	0.68337	0.875	0.69946	0.9	0.70662	0.95	0.72644	111	0.63965	8.56982
144	0.05	0.56548	0.1	0.58033	0.125	0.5858	0.2	0.59922	0.25	0.6067	0.5	0.63722	0.75	0.66908	0.8	0.6773	0.875	0.69289	0.9	0.69977	0.95	0.71948	111	0.6343	8.63545
145	0.05	0.5623	0.1	0.57789	0.125	0.58337	0.2	0.59704	0.25	0.60479	0.5	0.63554	0.75	0.66781	0.8	0.67579	0.875	0.69146	0.9	0.69831	0.95	0.71829	111	0.62991	8.55526
146	0.05	0.56174	0.1	0.57806	0.125	0.58402	0.2	0.59806	0.25	0.60587	0.5	0.63759	0.75	0.67054	0.8	0.67894	0.875	0.69485	0.9	0.70178	0.95	0.72191	111	0.6349	8.30938
147	0.05	0.5639	0.1	0.58109	0.125	0.58743	0.2	0.60213	0.25	0.61014	0.5	0.64327	0.75	0.67756	0.8	0.68611	0.875	0.70259	0.9	0.7098	0.95	0.73047	111	0.64091	7.98584
148	0.05	0.56845	0.1	0.58668	0.125	0.59332	0.2	0.60894	0.25	0.61748	0.5	0.6521	0.75	0.68812	0.8	0.69708	0.875	0.71438	0.9	0.72161	0.95	0.74343	111	0.64964	7.59264
149	0.05	0.5758	0.1	0.59518	0.125	0.60191	0.2	0.61845	0.25	0.62749	0.5	0.66422	0.75	0.70178	0.8	0.71135	0.875	0.72927	0.9	0.73719	0.95	0.76022	111	0.66277	7.19662
150	0.05	0.5851	0.1	0.60567	0.125	0.61296	0.2	0.63038	0.25	0.63994	0.5	0.67873	0.75	0.71811	0.8	0.72827	0.875	0.74724	0.9	0.75568	0.95	0.78005	111	0.67887	6.8446
151	0.05	0.59661	0.1	0.61839	0.125	0.62602	0.2	0.64437	0.25	0.65442	0.5	0.69554	0.75	0.73674	0.8	0.7473	0.875	0.76735	0.9	0.77651	0.95	0.80173	111	0.69687	6.53811
152	0.05	0.61001	0.1	0.63272	0.125	0.64067	0.2	0.65999	0.25	0.67044	0.5	0.71383	0.75	0.75677	0.8	0.76774	0.875	0.789	0.9	0.79817	0.95	0.82485	111	0.71588	6.27764
153	0.05	0.62462	0.1	0.64816	0.125	0.65659	0.2	0.67655	0.25	0.68744	0.5	0.7327	0.75	0.7775	0.8	0.78906	0.875	0.81103	0.9	0.82063	0.95	0.84813	111	0.73444	6.05812
154	0.05	0.64027	0.1	0.66404	0.125	0.6728	0.2	0.69355	0.25	0.70495	0.5	0.75174	0.75	0.79817	0.8	0.8102	0.875	0.83292	0.9	0.84283	0.95	0.87116	111	0.75315	5.86163
155	0.05	0.65575	0.1	0.67998	0.125	0.68877	0.2	0.71005	0.25	0.72203	0.5	0.77022	0.75	0.8181	0.8	0.83034	0.875	0.85397	0.9	0.8644	0.95	0.89317	111	0.77237	5.66666
156	0.05	0.67032	0.1	0.69483	0.125	0.70397	0.2	0.72554	0.25	0.73771	0.5	0.78696	0.75	0.8364	0.8	0.84916	0.875	0.87355	0.9	0.88416	0.95	0.91346	111	0.78861	5.50364
157	0.05	0.68341	0.1	0.70791	0.125	0.71702	0.2	0.73907	0.25	0.75113	0.5	0.80127	0.75	0.85237	0.8	0.86554	0.875	0.89072	0.9	0.90182	0.95	0.93138	111	0.80116	5.35835
158	0.05	0.69338	0.1	0.71832	0.125	0.72747	0.2	0.7497	0.25	0.76159	0.5	0.8125	0.75	0.86533	0.8	0.87911	0.875	0.90494	0.9	0.91649	0.95	0.94656	111	0.81081	5.24766
