# Supplementary material for: Time-varying asymmetry and tail thickness in long series of daily financial returns
Source: publisher site journal article supplement (doi:10.1515/snde-2017-0071), 2018-10-02
Supplement: Supplementary file 387 [file thres_ucv.xlsx]

## Sheet: 1
	Var1	Var2	Var3	Var4	Var5	Var6	Var7	Var8	Var9	Var10	Var11	Var12	Var13	Var14	Var15	Var16	Var17	Var18	Var19	Var20	Var21	Var22	Var23	Var24	Var25
1	0	0	0	0	0	0	0	0	0	0	0	0	0	0	0	0	0	0	0	0	0	0	0	0	0
2	0.05	1.0761	0.1	1.1681	0.125	1.2032	0.2	1.2889	0.25	1.3373	0.5	1.5618	0.75	1.8425	0.8	1.9229	0.875	2.0817	0.9	2.1571	0.95	2.3723	111	1.4624	1.14086
3	0.05	1.0052	0.1	1.0874	0.125	1.1189	0.2	1.1946	0.25	1.239	0.5	1.4351	0.75	1.6822	0.8	1.7538	0.875	1.8967	0.9	1.962	0.95	2.1501	111	1.3224	1.29718
4	0.05	0.944	0.1	1.017	0.125	1.0442	0.2	1.1131	0.25	1.152	0.5	1.3235	0.75	1.5417	0.8	1.6048	0.875	1.732	0.9	1.7878	0.95	1.9505	111	1.2723	1.50396
5	0.05	0.8891	0.1	0.9549	0.125	0.9799	0.2	1.0421	0.25	1.0765	0.5	1.2279	0.75	1.4213	0.8	1.478	0.875	1.5884	0.9	1.636	0.95	1.7826	111	1.1685	1.71046
6	0.05	0.8421	0.1	0.9018	0.125	0.9241	0.2	0.9804	0.25	1.0119	0.5	1.147	0.75	1.3211	0.8	1.371	0.875	1.4678	0.9	1.5109	0.95	1.6443	111	1.0957	1.91525
7	0.05	0.801	0.1	0.8561	0.125	0.877	0.2	0.9276	0.25	0.9562	0.5	1.0807	0.75	1.2379	0.8	1.2822	0.875	1.3702	0.9	1.4083	0.95	1.534	111	1.0319	2.05775
8	0.05	0.7665	0.1	0.817	0.125	0.8371	0.2	0.8833	0.25	0.9098	0.5	1.0275	0.75	1.171	0.8	1.2115	0.875	1.292	0.9	1.3286	0.95	1.4488	111	0.968	2.18355
9	0.05	0.7373	0.1	0.7849	0.125	0.8039	0.2	0.8474	0.25	0.8719	0.5	0.9851	0.75	1.1201	0.8	1.1575	0.875	1.2341	0.9	1.2703	0.95	1.3829	111	0.9442	2.25331
10	0.05	0.7137	0.1	0.7592	0.125	0.7769	0.2	0.8192	0.25	0.8428	0.5	0.9523	0.75	1.0821	0.8	1.1182	0.875	1.1926	0.9	1.2273	0.95	1.3367	111	0.9168	2.33192
11	0.05	0.6948	0.1	0.7402	0.125	0.7568	0.2	0.7979	0.25	0.8212	0.5	0.9284	0.75	1.0553	0.8	1.0919	0.875	1.1638	0.9	1.199	0.95	1.3056	111	0.88	2.37708
12	0.05	0.681	0.1	0.7264	0.125	0.7423	0.2	0.7831	0.25	0.8064	0.5	0.9112	0.75	1.0379	0.8	1.075	0.875	1.1466	0.9	1.181	0.95	1.2856	111	0.8669	2.40255
13	0.05	0.6725	0.1	0.7177	0.125	0.7332	0.2	0.7732	0.25	0.7968	0.5	0.9009	0.75	1.0293	0.8	1.0645	0.875	1.1368	0.9	1.1697	0.95	1.2728	111	0.8537	2.45232
14	0.05	0.6673	0.1	0.7122	0.125	0.7285	0.2	0.7681	0.25	0.7915	0.5	0.8955	0.75	1.025	0.8	1.0599	0.875	1.1325	0.9	1.1645	0.95	1.2653	111	0.8569	2.49448
15	0.05	0.6657	0.1	0.7102	0.125	0.7271	0.2	0.7666	0.25	0.7902	0.5	0.8942	0.75	1.0233	0.8	1.0584	0.875	1.1301	0.9	1.162	0.95	1.2611	111	0.8611	2.4954
16	0.05	0.6674	0.1	0.7111	0.125	0.7273	0.2	0.7681	0.25	0.7915	0.5	0.8954	0.75	1.0226	0.8	1.0575	0.875	1.1287	0.9	1.1598	0.95	1.2582	111	0.8557	2.47714
17	0.05	0.6708	0.1	0.713	0.125	0.7294	0.2	0.7704	0.25	0.794	0.5	0.8966	0.75	1.021	0.8	1.0559	0.875	1.1248	0.9	1.1555	0.95	1.2536	111	0.854	2.50272
18	0.05	0.6748	0.1	0.715	0.125	0.7317	0.2	0.7723	0.25	0.7955	0.5	0.8963	0.75	1.018	0.8	1.0514	0.875	1.1176	0.9	1.1484	0.95	1.2445	111	0.8556	2.55924
19	0.05	0.677	0.1	0.716	0.125	0.7322	0.2	0.7721	0.25	0.7947	0.5	0.8927	0.75	1.0109	0.8	1.043	0.875	1.1073	0.9	1.1369	0.95	1.2312	111	0.8558	2.6415
20	0.05	0.6759	0.1	0.7144	0.125	0.7295	0.2	0.7683	0.25	0.7895	0.5	0.8844	0.75	0.9989	0.8	1.0298	0.875	1.0919	0.9	1.1203	0.95	1.211	111	0.858	2.73978
21	0.05	0.6711	0.1	0.7073	0.125	0.7223	0.2	0.759	0.25	0.7796	0.5	0.871	0.75	0.9802	0.8	1.0111	0.875	1.0707	0.9	1.0986	0.95	1.1838	111	0.8518	2.8317
22	0.05	0.6596	0.1	0.695	0.125	0.7087	0.2	0.7438	0.25	0.7633	0.5	0.8508	0.75	0.9549	0.8	0.9859	0.875	1.0442	0.9	1.0701	0.95	1.151	111	0.8222	2.94557
23	0.05	0.6414	0.1	0.6753	0.125	0.6886	0.2	0.7216	0.25	0.7407	0.5	0.8237	0.75	0.9237	0.8	0.9533	0.875	1.011	0.9	1.0362	0.95	1.1136	111	0.7935	3.09509
24	0.05	0.6163	0.1	0.6489	0.125	0.6616	0.2	0.6933	0.25	0.7111	0.5	0.7901	0.75	0.8874	0.8	0.9154	0.875	0.9712	0.9	0.9961	0.95	1.07	111	0.7615	3.24045
25	0.05	0.5849	0.1	0.6166	0.125	0.6289	0.2	0.6586	0.25	0.6754	0.5	0.7509	0.75	0.8445	0.8	0.8715	0.875	0.926	0.9	0.9489	0.95	1.0205	111	0.7238	3.43864
26	0.05	0.5485	0.1	0.5799	0.125	0.5914	0.2	0.6195	0.25	0.6353	0.5	0.7075	0.75	0.7967	0.8	0.8229	0.875	0.8752	0.9	0.898	0.95	0.9642	111	0.6763	3.52661
27	0.05	0.5096	0.1	0.54	0.125	0.5507	0.2	0.5772	0.25	0.5921	0.5	0.6608	0.75	0.7457	0.8	0.7706	0.875	0.8205	0.9	0.8422	0.95	0.9052	111	0.6523	3.6828
28	0.05	0.47015	0.1	0.4988	0.125	0.5084	0.2	0.53355	0.25	0.5474	0.5	0.6124	0.75	0.69245	0.8	0.71595	0.875	0.7626	0.9	0.78275	0.95	0.8429	111	0.59095	3.90203
29	0.05	0.43135	0.1	0.45765	0.125	0.46695	0.2	0.48995	0.25	0.50305	0.5	0.5638	0.75	0.6385	0.8	0.66075	0.875	0.7034	0.9	0.7224	0.95	0.77925	111	0.53915	4.20428
30	0.05	0.3942	0.1	0.41835	0.125	0.4271	0.2	0.44815	0.25	0.4603	0.5	0.5162	0.75	0.58525	0.8	0.6054	0.875	0.6446	0.9	0.66205	0.95	0.7154	111	0.49095	4.58055
31	0.05	0.3597	0.1	0.38165	0.125	0.3897	0.2	0.409	0.25	0.42025	0.5	0.4711	0.75	0.5342	0.8	0.55245	0.875	0.58765	0.9	0.6039	0.95	0.6533	111	0.44275	5.09821
32	0.05	0.32855	0.1	0.34855	0.125	0.3557	0.2	0.37345	0.25	0.3836	0.5	0.42935	0.75	0.4862	0.8	0.50255	0.875	0.53425	0.9	0.54855	0.95	0.5942	111	0.40745	5.60181
33	0.05	0.3009	0.1	0.319	0.125	0.3255	0.2	0.34165	0.25	0.35075	0.5	0.39145	0.75	0.4424	0.8	0.45705	0.875	0.48555	0.9	0.4983	0.95	0.53945	111	0.3743	6.2744
34	0.05	0.27725	0.1	0.2933	0.125	0.29935	0.2	0.3138	0.25	0.322	0.5	0.3584	0.75	0.4036	0.8	0.4166	0.875	0.4417	0.9	0.4533	0.95	0.4894	111	0.34365	7.03035
35	0.05	0.25706	0.1	0.27154	0.125	0.27696	0.2	0.29006	0.25	0.2974	0.5	0.33005	0.75	0.36996	0.8	0.38156	0.875	0.40388	0.9	0.41413	0.95	0.44554	111	0.31681	7.82689
36	0.05	0.24015	0.1	0.25332	0.125	0.25824	0.2	0.27006	0.25	0.27664	0.5	0.30621	0.75	0.34151	0.8	0.35194	0.875	0.37177	0.9	0.38105	0.95	0.4085	111	0.29472	8.67029
37	0.05	0.22649	0.1	0.23851	0.125	0.24295	0.2	0.25368	0.25	0.25979	0.5	0.28669	0.75	0.31838	0.8	0.32755	0.875	0.34582	0.9	0.3541	0.95	0.37819	111	0.27782	9.58243
38	0.05	0.21584	0.1	0.22684	0.125	0.23091	0.2	0.24085	0.25	0.24661	0.5	0.27145	0.75	0.30054	0.8	0.30861	0.875	0.32554	0.9	0.33282	0.95	0.35443	111	0.26334	10.3198
39	0.05	0.20787	0.1	0.21803	0.125	0.22194	0.2	0.23148	0.25	0.2368	0.5	0.26034	0.75	0.28758	0.8	0.29513	0.875	0.31044	0.9	0.3176	0.95	0.33762	111	0.25337	10.8924
40	0.05	0.20232	0.1	0.21229	0.125	0.216	0.2	0.22511	0.25	0.2304	0.5	0.25313	0.75	0.27929	0.8	0.28658	0.875	0.30124	0.9	0.30778	0.95	0.32681	111	0.24672	11.1661
41	0.05	0.19958	0.1	0.20942	0.125	0.21293	0.2	0.22205	0.25	0.22708	0.5	0.24976	0.75	0.27551	0.8	0.28272	0.875	0.2972	0.9	0.30365	0.95	0.32185	111	0.2363	11.2592
42	0.05	0.1995	0.1	0.20922	0.125	0.21294	0.2	0.22206	0.25	0.22699	0.5	0.25007	0.75	0.27621	0.8	0.28373	0.875	0.29801	0.9	0.30458	0.95	0.32269	111	0.23523	10.9549
43	0.05	0.20218	0.1	0.21211	0.125	0.21596	0.2	0.22524	0.25	0.23034	0.5	0.25413	0.75	0.2813	0.8	0.28904	0.875	0.30398	0.9	0.31028	0.95	0.32964	111	0.2382	10.739
44	0.05	0.2076	0.1	0.21817	0.125	0.22209	0.2	0.23177	0.25	0.23719	0.5	0.26215	0.75	0.29078	0.8	0.29893	0.875	0.31475	0.9	0.32143	0.95	0.34183	111	0.25112	10.2045
45	0.05	0.21633	0.1	0.22758	0.125	0.23159	0.2	0.24199	0.25	0.24779	0.5	0.27409	0.75	0.30496	0.8	0.31356	0.875	0.33028	0.9	0.33748	0.95	0.35879	111	0.26411	9.71777
46	0.05	0.22828	0.1	0.24048	0.125	0.24484	0.2	0.25616	0.25	0.26235	0.5	0.29041	0.75	0.32369	0.8	0.3329	0.875	0.35083	0.9	0.35862	0.95	0.38155	111	0.27999	9.14887
47	0.05	0.24421	0.1	0.25729	0.125	0.26202	0.2	0.2743	0.25	0.28122	0.5	0.31127	0.75	0.34721	0.8	0.35729	0.875	0.37648	0.9	0.38481	0.95	0.40992	111	0.30048	8.54191
48	0.05	0.26392	0.1	0.27835	0.125	0.28353	0.2	0.29688	0.25	0.30445	0.5	0.33678	0.75	0.37561	0.8	0.38655	0.875	0.40717	0.9	0.41634	0.95	0.44351	111	0.32621	7.92489
49	0.05	0.28782	0.1	0.30373	0.125	0.30957	0.2	0.32394	0.25	0.33208	0.5	0.36716	0.75	0.40896	0.8	0.42088	0.875	0.44293	0.9	0.45283	0.95	0.4822	111	0.35611	7.32228
50	0.05	0.31623	0.1	0.33361	0.125	0.34011	0.2	0.35552	0.25	0.36432	0.5	0.40237	0.75	0.44725	0.8	0.45979	0.875	0.48357	0.9	0.49438	0.95	0.52624	111	0.39184	6.76739
51	0.05	0.34886	0.1	0.3676	0.125	0.37478	0.2	0.39163	0.25	0.401	0.5	0.44226	0.75	0.49006	0.8	0.50337	0.875	0.52889	0.9	0.5405	0.95	0.57513	111	0.43184	6.26892
52	0.05	0.38549	0.1	0.40535	0.125	0.41317	0.2	0.43148	0.25	0.44172	0.5	0.48607	0.75	0.53707	0.8	0.55101	0.875	0.57875	0.9	0.59099	0.95	0.62783	111	0.47441	5.82867
53	0.05	0.4252	0.1	0.44655	0.125	0.4546	0.2	0.47435	0.25	0.48545	0.5	0.53295	0.75	0.58725	0.8	0.60225	0.875	0.6317	0.9	0.64495	0.95	0.6836	111	0.52135	5.45278
54	0.05	0.4665	0.1	0.4894	0.125	0.49805	0.2	0.5191	0.25	0.5311	0.5	0.5822	0.75	0.6401	0.8	0.656	0.875	0.687	0.9	0.7011	0.95	0.7433	111	0.5718	5.08722
55	0.05	0.508	0.1	0.53255	0.125	0.54165	0.2	0.5645	0.25	0.5769	0.5	0.63175	0.75	0.6936	0.8	0.71075	0.875	0.74385	0.9	0.75895	0.95	0.80445	111	0.61985	4.717
56	0.05	0.548	0.1	0.57385	0.125	0.58365	0.2	0.60805	0.25	0.62135	0.5	0.68015	0.75	0.7465	0.8	0.76485	0.875	0.80005	0.9	0.81625	0.95	0.8656	111	0.6647	4.39487
57	0.05	0.5839	0.1	0.6116	0.125	0.62215	0.2	0.6481	0.25	0.66265	0.5	0.7253	0.75	0.7966	0.8	0.81575	0.875	0.85385	0.9	0.8714	0.95	0.9244	111	0.70725	4.11319
58	0.05	0.6136	0.1	0.6439	0.125	0.65495	0.2	0.68295	0.25	0.6985	0.5	0.7651	0.75	0.84185	0.8	0.86255	0.875	0.9037	0.9	0.9232	0.95	0.9804	111	0.7434	3.87625
59	0.05	0.63685	0.1	0.6692	0.125	0.6815	0.2	0.7113	0.25	0.72765	0.5	0.79835	0.75	0.8806	0.8	0.90255	0.875	0.94695	0.9	0.96775	0.95	1.0306	111	0.7771	3.63847
60	0.05	0.6526	0.1	0.6871	0.125	0.7003	0.2	0.73175	0.25	0.7491	0.5	0.8236	0.75	0.9114	0.8	0.93435	0.875	0.98165	0.9	1.0036	0.95	1.0714	111	0.80555	3.461
61	0.05	0.6619	0.1	0.6977	0.125	0.7114	0.2	0.74425	0.25	0.76215	0.5	0.84035	0.75	0.9323	0.8	0.95745	0.875	1.00665	0.9	1.0299	0.95	1.10195	111	0.8234	3.30361
62	0.05	0.6639	0.1	0.7012	0.125	0.7151	0.2	0.7485	0.25	0.7671	0.5	0.8479	0.75	0.9436	0.8	0.9697	0.875	1.0208	0.9	1.0449	0.95	1.1205	111	0.8282	3.20282
63	0.05	0.6602	0.1	0.6981	0.125	0.7122	0.2	0.7459	0.25	0.7647	0.5	0.8472	0.75	0.9452	0.8	0.9721	0.875	1.0244	0.9	1.0495	0.95	1.1276	111	0.8223	3.14653
64	0.05	0.6516	0.1	0.6897	0.125	0.7038	0.2	0.7375	0.25	0.7564	0.5	0.8392	0.75	0.938	0.8	0.9655	0.875	1.0186	0.9	1.0442	0.95	1.1225	111	0.8155	3.12841
65	0.05	0.6394	0.1	0.6771	0.125	0.691	0.2	0.7243	0.25	0.7434	0.5	0.8254	0.75	0.9237	0.8	0.9511	0.875	1.0045	0.9	1.0296	0.95	1.1081	111	0.8016	3.13838
66	0.05	0.6252	0.1	0.6621	0.125	0.6757	0.2	0.7082	0.25	0.7269	0.5	0.808	0.75	0.9042	0.8	0.9312	0.875	0.9844	0.9	1.0086	0.95	1.086	111	0.7821	3.17923
67	0.05	0.6103	0.1	0.646	0.125	0.6592	0.2	0.6907	0.25	0.7087	0.5	0.7878	0.75	0.8817	0.8	0.9081	0.875	0.9604	0.9	0.9835	0.95	1.0593	111	0.7612	3.24385
68	0.05	0.5953	0.1	0.63	0.125	0.6425	0.2	0.673	0.25	0.6906	0.5	0.7672	0.75	0.8586	0.8	0.884	0.875	0.9344	0.9	0.9571	0.95	1.0295	111	0.7395	3.33419
69	0.05	0.5819	0.1	0.61485	0.125	0.62705	0.2	0.65635	0.25	0.6734	0.5	0.74785	0.75	0.83635	0.8	0.86105	0.875	0.90985	0.9	0.93195	0.95	1.00065	111	0.7185	3.44568
70	0.05	0.57035	0.1	0.60195	0.125	0.61385	0.2	0.64225	0.25	0.6586	0.5	0.7308	0.75	0.81705	0.8	0.8407	0.875	0.88785	0.9	0.90905	0.95	0.97575	111	0.7045	3.54343
71	0.05	0.5607	0.1	0.59195	0.125	0.6032	0.2	0.6313	0.25	0.6472	0.5	0.71755	0.75	0.80185	0.8	0.8247	0.875	0.8707	0.9	0.89115	0.95	0.95665	111	0.69245	3.62223
72	0.05	0.5543	0.1	0.5852	0.125	0.59695	0.2	0.6243	0.25	0.63985	0.5	0.70905	0.75	0.7917	0.8	0.8144	0.875	0.8594	0.9	0.87965	0.95	0.94415	111	0.68285	3.68038
73	0.05	0.5514	0.1	0.583	0.125	0.5944	0.2	0.62205	0.25	0.63725	0.5	0.70615	0.75	0.78795	0.8	0.8102	0.875	0.8557	0.9	0.87535	0.95	0.9397	111	0.6782	3.70913
74	0.05	0.55365	0.1	0.58525	0.125	0.59705	0.2	0.62485	0.25	0.6403	0.5	0.70955	0.75	0.7915	0.8	0.81405	0.875	0.8597	0.9	0.8797	0.95	0.94465	111	0.6778	3.68654
75	0.05	0.5612	0.1	0.5931	0.125	0.60505	0.2	0.63345	0.25	0.64925	0.5	0.71975	0.75	0.80315	0.8	0.82595	0.875	0.87255	0.9	0.8933	0.95	0.9591	111	0.6853	3.60159
76	0.05	0.57435	0.1	0.6066	0.125	0.6191	0.2	0.6482	0.25	0.66435	0.5	0.73755	0.75	0.82375	0.8	0.84705	0.875	0.89395	0.9	0.9165	0.95	0.985	111	0.705	3.47965
77	0.05	0.59335	0.1	0.6265	0.125	0.63935	0.2	0.6697	0.25	0.68665	0.5	0.7632	0.75	0.85325	0.8	0.877	0.875	0.92605	0.9	0.9501	0.95	1.02255	111	0.7267	3.34012
78	0.05	0.6189	0.1	0.6535	0.125	0.6665	0.2	0.69875	0.25	0.7168	0.5	0.7974	0.75	0.89265	0.8	0.91765	0.875	0.96945	0.9	0.99395	0.95	1.0711	111	0.7645	3.17286
79	0.05	0.6516	0.1	0.68765	0.125	0.70135	0.2	0.7354	0.25	0.75485	0.5	0.8406	0.75	0.942	0.8	0.96905	0.875	1.0238	0.9	1.0499	0.95	1.13185	111	0.8052	2.98822
80	0.05	0.6914	0.1	0.72945	0.125	0.7438	0.2	0.7803	0.25	0.80115	0.5	0.89295	0.75	1.0019	0.8	1.0312	0.875	1.0895	0.9	1.11835	0.95	1.2061	111	0.8551	2.78971
81	0.05	0.73875	0.1	0.77885	0.125	0.7942	0.2	0.83345	0.25	0.8558	0.5	0.95475	0.75	1.0721	0.8	1.10325	0.875	1.16665	0.9	1.19765	0.95	1.29285	111	0.9184	2.58388
82	0.05	0.793	0.1	0.8361	0.125	0.8525	0.2	0.8945	0.25	0.9184	0.5	1.0254	0.75	1.1527	0.8	1.1866	0.875	1.2549	0.9	1.2875	0.95	1.391	111	0.9917	2.38907
83	0.05	0.8535	0.1	0.9001	0.125	0.9184	0.2	0.9626	0.25	0.9885	0.5	1.1047	0.75	1.242	0.8	1.2788	0.875	1.3534	0.9	1.3883	0.95	1.5016	111	1.0695	2.2044
84	0.05	0.9197	0.1	0.9697	0.125	0.9894	0.2	1.0368	0.25	1.0649	0.5	1.1905	0.75	1.3387	0.8	1.3791	0.875	1.4608	0.9	1.4987	0.95	1.6202	111	1.1535	2.03331
85	0.05	0.9895	0.1	1.0436	0.125	1.0644	0.2	1.1157	0.25	1.1459	0.5	1.2814	0.75	1.4408	0.8	1.4849	0.875	1.5734	0.9	1.6153	0.95	1.7449	111	1.2359	1.87782
86	0.05	1.0593	0.1	1.118	0.125	1.14	0.2	1.196	0.25	1.2284	0.5	1.374	0.75	1.5448	0.8	1.5929	0.875	1.6891	0.9	1.7346	0.95	1.8716	111	1.3169	1.74485
87	0.05	1.1275	0.1	1.1908	0.125	1.2145	0.2	1.2748	0.25	1.3088	0.5	1.4649	0.75	1.6479	0.8	1.6986	0.875	1.8017	0.9	1.85	0.95	1.9978	111	1.4013	1.63566
88	0.05	1.1895	0.1	1.2585	0.125	1.2827	0.2	1.3469	0.25	1.3839	0.5	1.5496	0.75	1.7448	0.8	1.7987	0.875	1.9075	0.9	1.9592	0.95	2.1172	111	1.4798	1.55293
89	0.05	1.2434	0.1	1.3151	0.125	1.3417	0.2	1.4099	0.25	1.4491	0.5	1.6239	0.75	1.8304	0.8	1.8866	0.875	2.0014	0.9	2.0567	0.95	2.2249	111	1.5517	1.4782
90	0.05	1.2846	0.1	1.3587	0.125	1.3875	0.2	1.4588	0.25	1.5009	0.5	1.6826	0.75	1.8989	0.8	1.9573	0.875	2.0778	0.9	2.1366	0.95	2.3161	111	1.6149	1.40627
91	0.05	1.3115	0.1	1.3875	0.125	1.4167	0.2	1.491	0.25	1.5343	0.5	1.7231	0.75	1.9459	0.8	2.008	0.875	2.1338	0.9	2.1937	0.95	2.3835	111	1.6562	1.35339
92	0.05	1.3198	0.1	1.3982	0.125	1.4285	0.2	1.5047	0.25	1.5483	0.5	1.7416	0.75	1.9697	0.8	2.0337	0.875	2.1626	0.9	2.2233	0.95	2.4211	111	1.7063	1.31365
93	0.05	1.3106	0.1	1.3911	0.125	1.4208	0.2	1.4975	0.25	1.542	0.5	1.7381	0.75	1.9684	0.8	2.0335	0.875	2.1641	0.9	2.2248	0.95	2.4289	111	1.6625	1.29319
94	0.05	1.2845	0.1	1.3654	0.125	1.3952	0.2	1.4707	0.25	1.515	0.5	1.7107	0.75	1.941	0.8	2.0068	0.875	2.1366	0.9	2.1983	0.95	2.4007	111	1.6266	1.29939
95	0.05	1.2435	0.1	1.3235	0.125	1.3526	0.2	1.4262	0.25	1.4695	0.5	1.6621	0.75	1.8899	0.8	1.9547	0.875	2.0829	0.9	2.1438	0.95	2.345	111	1.5804	1.32471
96	0.05	1.1904	0.1	1.2676	0.125	1.2963	0.2	1.3681	0.25	1.4092	0.5	1.5957	0.75	1.818	0.8	1.8796	0.875	2.0067	0.9	2.0665	0.95	2.2599	111	1.5154	1.36799
97	0.05	1.1288	0.1	1.2018	0.125	1.2292	0.2	1.2983	0.25	1.3372	0.5	1.5155	0.75	1.729	0.8	1.7886	0.875	1.913	0.9	1.9693	0.95	2.1535	111	1.4378	1.42834
98	0.05	1.0605	0.1	1.1301	0.125	1.1558	0.2	1.2205	0.25	1.2577	0.5	1.4266	0.75	1.6295	0.8	1.6865	0.875	1.8047	0.9	1.8583	0.95	2.0329	111	1.3528	1.50812
99	0.05	0.9899	0.1	1.0555	0.125	1.0795	0.2	1.1393	0.25	1.1742	0.5	1.3324	0.75	1.5236	0.8	1.5783	0.875	1.6886	0.9	1.7395	0.95	1.9029	111	1.2664	1.61157
100	0.05	0.9201	0.1	0.981	0.125	1.0032	0.2	1.0585	0.25	1.0909	0.5	1.2378	0.75	1.417	0.8	1.4678	0.875	1.5708	0.9	1.6196	0.95	1.7717	111	1.178	1.7398
101	0.05	0.8535	0.1	0.9093	0.125	0.9298	0.2	0.9806	0.25	1.0106	0.5	1.1462	0.75	1.3133	0.8	1.3608	0.875	1.4561	0.9	1.501	0.95	1.6422	111	1.0883	1.88498
102	0.05	0.7912	0.1	0.8424	0.125	0.8616	0.2	0.9082	0.25	0.9359	0.5	1.0607	0.75	1.2157	0.8	1.2594	0.875	1.3479	0.9	1.3896	0.95	1.5198	111	1.004	2.04325
103	0.05	0.7348	0.1	0.782	0.125	0.7998	0.2	0.8425	0.25	0.8678	0.5	0.9833	0.75	1.1268	0.8	1.1673	0.875	1.2495	0.9	1.2879	0.95	1.4081	111	0.9272	2.21354
104	0.05	0.6852	0.1	0.7295	0.125	0.7451	0.2	0.7847	0.25	0.8077	0.5	0.9145	0.75	1.0476	0.8	1.0859	0.875	1.1622	0.9	1.1969	0.95	1.3089	111	0.8584	2.38878
105	0.05	0.6429	0.1	0.6838	0.125	0.6983	0.2	0.7349	0.25	0.7563	0.5	0.8554	0.75	0.9792	0.8	1.0153	0.875	1.0861	0.9	1.1198	0.95	1.2245	111	0.8038	2.57425
106	0.05	0.6078	0.1	0.6456	0.125	0.6593	0.2	0.6936	0.25	0.7136	0.5	0.8061	0.75	0.9224	0.8	0.9558	0.875	1.0229	0.9	1.0551	0.95	1.1518	111	0.7579	2.76853
107	0.05	0.5794	0.1	0.6154	0.125	0.6282	0.2	0.6607	0.25	0.6797	0.5	0.7665	0.75	0.8769	0.8	0.9083	0.875	0.9729	0.9	1.0035	0.95	1.0943	111	0.7257	2.95724
108	0.05	0.55805	0.1	0.5924	0.125	0.60485	0.2	0.63575	0.25	0.65375	0.5	0.7367	0.75	0.84245	0.8	0.87195	0.875	0.93495	0.9	0.96455	0.95	1.05165	111	0.70075	3.08509
109	0.05	0.5433	0.1	0.57675	0.125	0.5887	0.2	0.61855	0.25	0.6358	0.5	0.71635	0.75	0.8185	0.8	0.8476	0.875	0.90835	0.9	0.93765	0.95	1.02235	111	0.67495	3.15833
110	0.05	0.5351	0.1	0.5677	0.125	0.57955	0.2	0.6087	0.25	0.6256	0.5	0.7051	0.75	0.80485	0.8	0.8334	0.875	0.89245	0.9	0.9219	0.95	1.00565	111	0.66345	3.21013
111	0.05	0.5335	0.1	0.56525	0.125	0.5771	0.2	0.6061	0.25	0.6228	0.5	0.70205	0.75	0.8008	0.8	0.82945	0.875	0.88835	0.9	0.9169	0.95	1.0006	111	0.6682	3.25236
112	0.05	0.53715	0.1	0.5687	0.125	0.5807	0.2	0.6103	0.25	0.6272	0.5	0.70665	0.75	0.80665	0.8	0.8355	0.875	0.8951	0.9	0.92275	0.95	1.00685	111	0.66595	3.2174
113	0.05	0.5464	0.1	0.57815	0.125	0.5907	0.2	0.6209	0.25	0.6382	0.5	0.71915	0.75	0.82155	0.8	0.85035	0.875	0.9111	0.9	0.93905	0.95	1.02495	111	0.67355	3.15975
114	0.05	0.5607	0.1	0.5935	0.125	0.6064	0.2	0.6377	0.25	0.656	0.5	0.7393	0.75	0.8448	0.8	0.8751	0.875	0.9366	0.9	0.9648	0.95	1.0519	111	0.685	3.10269
115	0.05	0.5799	0.1	0.6146	0.125	0.6276	0.2	0.6603	0.25	0.6791	0.5	0.7659	0.75	0.8761	0.8	0.908	0.875	0.9711	0.9	0.9997	0.95	1.0892	111	0.7048	3.04198
116	0.05	0.6039	0.1	0.6397	0.125	0.6535	0.2	0.688	0.25	0.7077	0.5	0.7985	0.75	0.9144	0.8	0.9473	0.875	1.0121	0.9	1.0424	0.95	1.1341	111	0.7393	2.84088
117	0.05	0.6312	0.1	0.6696	0.125	0.6839	0.2	0.7198	0.25	0.7406	0.5	0.8361	0.75	0.9584	0.8	0.9929	0.875	1.0604	0.9	1.0918	0.95	1.1866	111	0.7753	2.68377
118	0.05	0.6618	0.1	0.7023	0.125	0.7177	0.2	0.7548	0.25	0.7769	0.5	0.8778	0.75	1.0068	0.8	1.0426	0.875	1.1131	0.9	1.1459	0.95	1.2454	111	0.8135	2.54099
119	0.05	0.6946	0.1	0.7369	0.125	0.7531	0.2	0.7919	0.25	0.8152	0.5	0.9216	0.75	1.0573	0.8	1.0946	0.875	1.1684	0.9	1.2025	0.95	1.3076	111	0.8479	2.43861
120	0.05	0.7274	0.1	0.7714	0.125	0.7888	0.2	0.8293	0.25	0.8533	0.5	0.9655	0.75	1.1077	0.8	1.1468	0.875	1.2243	0.9	1.2597	0.95	1.3699	111	0.8939	2.28884
121	0.05	0.7582	0.1	0.8047	0.125	0.8225	0.2	0.8652	0.25	0.8898	0.5	1.0073	0.75	1.1553	0.8	1.1963	0.875	1.2774	0.9	1.3136	0.95	1.4285	111	0.9338	2.18392
122	0.05	0.7858	0.1	0.834	0.125	0.8525	0.2	0.897	0.25	0.9222	0.5	1.0437	0.75	1.1975	0.8	1.2397	0.875	1.3241	0.9	1.361	0.95	1.4806	111	0.97	2.10765
123	0.05	0.808	0.1	0.8576	0.125	0.8767	0.2	0.9227	0.25	0.9489	0.5	1.0733	0.75	1.2315	0.8	1.2744	0.875	1.3616	0.9	1.4006	0.95	1.5215	111	1.0011	2.06117
124	0.05	0.8227	0.1	0.8737	0.125	0.8932	0.2	0.9403	0.25	0.9672	0.5	1.093	0.75	1.254	0.8	1.2985	0.875	1.3859	0.9	1.4264	0.95	1.5487	111	1.0164	2.03576
125	0.05	0.8288	0.1	0.8805	0.125	0.9001	0.2	0.9483	0.25	0.9753	0.5	1.1015	0.75	1.2639	0.8	1.3078	0.875	1.3965	0.9	1.4374	0.95	1.5589	111	1.0203	2.0381
126	0.05	0.8247	0.1	0.8768	0.125	0.8969	0.2	0.9453	0.25	0.9722	0.5	1.0976	0.75	1.2588	0.8	1.3036	0.875	1.3909	0.9	1.4317	0.95	1.5535	111	1.0172	2.05066
127	0.05	0.811	0.1	0.8634	0.125	0.8823	0.2	0.9307	0.25	0.9573	0.5	1.0814	0.75	1.2394	0.8	1.2837	0.875	1.3686	0.9	1.4078	0.95	1.5269	111	1.0042	2.07374
128	0.05	0.7881	0.1	0.8394	0.125	0.8581	0.2	0.9056	0.25	0.9315	0.5	1.0528	0.75	1.206	0.8	1.2487	0.875	1.3309	0.9	1.3676	0.95	1.4821	111	0.9809	2.11652
129	0.05	0.7569	0.1	0.8065	0.125	0.8251	0.2	0.8709	0.25	0.8964	0.5	1.0134	0.75	1.1601	0.8	1.1997	0.875	1.2789	0.9	1.3135	0.95	1.4215	111	0.9431	2.18561
130	0.05	0.72	0.1	0.7665	0.125	0.7844	0.2	0.8286	0.25	0.8531	0.5	0.9653	0.75	1.1031	0.8	1.1399	0.875	1.2143	0.9	1.2478	0.95	1.3477	111	0.8949	2.30159
131	0.05	0.6782	0.1	0.7221	0.125	0.7394	0.2	0.7813	0.25	0.8042	0.5	0.9101	0.75	1.0384	0.8	1.0732	0.875	1.1416	0.9	1.1735	0.95	1.2646	111	0.8485	2.41786
132	0.05	0.6339	0.1	0.6755	0.125	0.6915	0.2	0.7306	0.25	0.752	0.5	0.8511	0.75	0.9697	0.8	1.0011	0.875	1.0642	0.9	1.093	0.95	1.1779	111	0.7993	2.57935
133	0.05	0.58965	0.1	0.62825	0.125	0.6429	0.2	0.679	0.25	0.699	0.5	0.79045	0.75	0.89885	0.8	0.92735	0.875	0.9853	0.9	1.0107	0.95	1.08955	111	0.7492	2.78224
134	0.05	0.5469	0.1	0.5823	0.125	0.5959	0.2	0.6286	0.25	0.647	0.5	0.73085	0.75	0.82895	0.8	0.8553	0.875	0.9068	0.9	0.93065	0.95	1.00205	111	0.6986	3.04229
135	0.05	0.50625	0.1	0.53905	0.125	0.55125	0.2	0.58095	0.25	0.5976	0.5	0.6739	0.75	0.7619	0.8	0.7858	0.875	0.8324	0.9	0.8537	0.95	0.918	111	0.64475	3.35381
136	0.05	0.4697	0.1	0.49925	0.125	0.5101	0.2	0.5371	0.25	0.5524	0.5	0.62085	0.75	0.6997	0.8	0.7215	0.875	0.76345	0.9	0.78245	0.95	0.8396	111	0.59605	3.72748
137	0.05	0.4372	0.1	0.4637	0.125	0.47345	0.2	0.49815	0.25	0.51175	0.5	0.5732	0.75	0.64405	0.8	0.66365	0.875	0.70115	0.9	0.71835	0.95	0.76955	111	0.55285	4.15994
138	0.05	0.40865	0.1	0.4326	0.125	0.4415	0.2	0.4638	0.25	0.47635	0.5	0.53145	0.75	0.59515	0.8	0.6124	0.875	0.64645	0.9	0.6617	0.95	0.7073	111	0.51355	4.63729
139	0.05	0.38425	0.1	0.40625	0.125	0.41445	0.2	0.43465	0.25	0.446	0.5	0.49575	0.75	0.553	0.8	0.5686	0.875	0.59945	0.9	0.61325	0.95	0.6537	111	0.4798	5.13457
140	0.05	0.36432	0.1	0.38457	0.125	0.39183	0.2	0.41041	0.25	0.42066	0.5	0.46627	0.75	0.51827	0.8	0.53229	0.875	0.56053	0.9	0.57274	0.95	0.60856	111	0.45249	5.63647
141	0.05	0.34799	0.1	0.36673	0.125	0.37394	0.2	0.39088	0.25	0.4006	0.5	0.44297	0.75	0.49057	0.8	0.50348	0.875	0.52901	0.9	0.54028	0.95	0.57272	111	0.43098	6.09456
142	0.05	0.33523	0.1	0.35328	0.125	0.35972	0.2	0.3761	0.25	0.38537	0.5	0.42534	0.75	0.46974	0.8	0.48204	0.875	0.50542	0.9	0.51583	0.95	0.54619	111	0.41668	6.41843
143	0.05	0.3261	0.1	0.34316	0.125	0.34956	0.2	0.36553	0.25	0.37454	0.5	0.41299	0.75	0.45556	0.8	0.46699	0.875	0.48924	0.9	0.49931	0.95	0.52771	111	0.4051	6.72146
144	0.05	0.31977	0.1	0.33679	0.125	0.34316	0.2	0.35907	0.25	0.36808	0.5	0.40605	0.75	0.44767	0.8	0.45873	0.875	0.48009	0.9	0.48968	0.95	0.51765	111	0.39772	6.83188
145	0.05	0.31618	0.1	0.33395	0.125	0.34032	0.2	0.35646	0.25	0.36577	0.5	0.40391	0.75	0.44598	0.8	0.4567	0.875	0.47812	0.9	0.48763	0.95	0.51594	111	0.3929	6.81203
146	0.05	0.31555	0.1	0.33415	0.125	0.34105	0.2	0.35765	0.25	0.36705	0.5	0.4065	0.75	0.4496	0.8	0.46095	0.875	0.4828	0.9	0.4925	0.95	0.52115	111	0.3989	6.56769
147	0.05	0.31795	0.1	0.33765	0.125	0.34505	0.2	0.36255	0.25	0.37225	0.5	0.4138	0.75	0.45905	0.8	0.47075	0.875	0.4936	0.9	0.5038	0.95	0.53355	111	0.40605	6.255
148	0.05	0.3231	0.1	0.3442	0.125	0.352	0.2	0.3708	0.25	0.38125	0.5	0.4252	0.75	0.4735	0.8	0.4859	0.875	0.5103	0.9	0.5207	0.95	0.5527	111	0.4166	5.86829
149	0.05	0.33155	0.1	0.3542	0.125	0.3623	0.2	0.38245	0.25	0.3937	0.5	0.44115	0.75	0.4925	0.8	0.506	0.875	0.5318	0.9	0.54345	0.95	0.5779	111	0.4317	5.45262
150	0.05	0.3423	0.1	0.3668	0.125	0.3757	0.2	0.39735	0.25	0.4095	0.5	0.46065	0.75	0.51565	0.8	0.53035	0.875	0.55835	0.9	0.57105	0.95	0.60845	111	0.45325	5.06163
151	0.05	0.3559	0.1	0.3824	0.125	0.3919	0.2	0.4152	0.25	0.42825	0.5	0.48375	0.75	0.54275	0.8	0.55845	0.875	0.5888	0.9	0.60295	0.95	0.64275	111	0.47865	4.70991
152	0.05	0.3721	0.1	0.4003	0.125	0.41045	0.2	0.43555	0.25	0.4495	0.5	0.50955	0.75	0.5727	0.8	0.5894	0.875	0.6225	0.9	0.63705	0.95	0.68035	111	0.5058	4.4002
153	0.05	0.39015	0.1	0.4201	0.125	0.4311	0.2	0.4577	0.25	0.47255	0.5	0.53685	0.75	0.6045	0.8	0.6226	0.875	0.65775	0.9	0.6734	0.95	0.7193	111	0.533	4.14044
154	0.05	0.40995	0.1	0.44095	0.125	0.45265	0.2	0.481	0.25	0.49695	0.5	0.5651	0.75	0.63705	0.8	0.6564	0.875	0.69375	0.9	0.71035	0.95	0.7589	111	0.5608	3.90698
155	0.05	0.43	0.1	0.46235	0.125	0.4744	0.2	0.50415	0.25	0.5213	0.5	0.5932	0.75	0.66925	0.8	0.68945	0.875	0.72925	0.9	0.74715	0.95	0.79775	111	0.5893	3.68214
156	0.05	0.4493	0.1	0.48275	0.125	0.49555	0.2	0.5264	0.25	0.5442	0.5	0.6193	0.75	0.69955	0.8	0.72105	0.875	0.76305	0.9	0.7817	0.95	0.8344	111	0.61385	3.50382
157	0.05	0.46705	0.1	0.5011	0.125	0.5141	0.2	0.5462	0.25	0.5642	0.5	0.642	0.75	0.7265	0.8	0.74915	0.875	0.79335	0.9	0.81325	0.95	0.86745	111	0.6322	3.35842
158	0.05	0.48075	0.1	0.51595	0.125	0.5292	0.2	0.56205	0.25	0.58	0.5	0.66015	0.75	0.74875	0.8	0.7728	0.875	0.8189	0.9	0.83995	0.95	0.89595	111	0.6462	3.25022
