# Supplementary material for: Time-varying asymmetry and tail thickness in long series of daily financial returns
Source: publisher site journal article supplement (doi:10.1515/snde-2017-0071), 2018-10-02
Supplement: Supplementary file 389 [file cvm_c1.xlsx]

## Sheet: 1
	Var1	Var2	Var3	Var4	Var5	Var6	Var7	Var8	Var9	Var10	Var11	Var12	Var13	Var14	Var15	Var16	Var17	Var18
1	0.034781	-0.0367696	-0.00198987	-0.00836678	0.000140376	0.000812402	-0.00795917	0.00279831	0.00135749	0.0233603	-0.0186036	0.00130831	0.0008397	0.00061466	-0.000928233	0.00329517	-0.00324641	-0.00960878
2	-0.0367696	0.0647149	0.00166928	-0.0118082	0.00533132	0.00450894	-0.00656719	-0.00599715	-0.00479302	-0.0509017	0.0306112	-0.00272744	0.0199854	-0.00367824	-7.83614e-05	0.0156982	0.0118559	0.00320417
3	-0.00198987	0.00166928	0.00443782	0.00165583	0.0016652	1.89444e-05	0.000801854	-0.00245723	-0.00092912	-0.00201574	0.000520473	-0.00336559	-0.00201778	0.00332018	-0.000134767	-0.000408654	0.00382571	0.0014123
4	-0.00836678	-0.0118082	0.00165583	0.0616398	-0.000966963	-0.00200497	0.0488914	0.0101216	-0.00229258	0.0247112	-0.00180153	0.00324292	-0.0437815	-0.00417721	0.00464491	-0.0370711	-0.0094948	0.0188571
5	0.000140376	0.00533132	0.0016652	-0.000966963	0.0204159	-5.71616e-05	0.00296217	-0.00948294	0.00212055	-0.006097	0.0020997	-0.00418891	0.000937974	0.0071013	-0.00460335	-0.000392597	0.00971685	-0.0116477
6	0.000812402	0.00450894	1.89444e-05	-0.00200497	-5.71616e-05	0.0225571	0.00547407	0.0131763	-0.0102574	-0.00849962	0.00136883	-0.00221626	0.00559382	-0.0147428	0.00295934	0.00456266	-0.00309188	0.0213699
7	-0.00795917	-0.00656719	0.000801854	0.0488914	0.00296217	0.00547407	0.0699974	0.00835334	-0.00561406	0.0187712	0.000883089	0.00103283	-0.043658	-0.00593917	0.00174757	-0.0350265	-0.0047856	0.0249544
8	0.00279831	-0.00599715	-0.00245723	0.0101216	-0.00948294	0.0131763	0.00835334	0.0503016	-0.0125855	0.00369267	-0.0029836	0.0020431	-0.00245166	-0.0254463	0.0140888	-0.00269089	-0.0100639	0.0335304
9	0.00135749	-0.00479302	-0.00092912	-0.00229258	0.00212055	-0.0102574	-0.00561406	-0.0125855	0.0474749	0.0095514	-0.00558891	0.0032642	-0.00691017	0.00423614	-0.00584173	-0.00751243	-0.00892791	-0.0285517
10	0.0233603	-0.0509017	-0.00201574	0.0247112	-0.006097	-0.00849962	0.0187712	0.00369267	0.0095514	0.052727	-0.0240023	0.00519572	-0.0337508	0.00448787	-0.000182591	-0.0293435	-0.0126046	0.00271839
11	-0.0186036	0.0306112	0.000520473	-0.00180153	0.0020997	0.00136883	0.000883089	-0.0029836	-0.00558891	-0.0240023	0.0250094	0.00077117	0.00132196	0.00175494	0.000565163	-4.81735e-05	0.00718661	0.00718875
12	0.00130831	-0.00272744	-0.00336559	0.00324292	-0.00418891	-0.00221626	0.00103283	0.0020431	0.0032642	0.00519572	0.00077117	0.00894576	-0.00509804	-0.00183097	0.000740601	-0.00253344	-0.00590259	-0.00209643
13	0.0008397	0.0199854	-0.00201778	-0.0437815	0.000937974	0.00559382	-0.043658	-0.00245166	-0.00691017	-0.0337508	0.00132196	-0.00509804	0.0612638	-0.00655572	-0.00318539	0.0432169	0.00395701	-0.0162507
14	0.00061466	-0.00367824	0.00332018	-0.00417721	0.0071013	-0.0147428	-0.00593917	-0.0254463	0.00423614	0.00448787	0.00175494	-0.00183097	-0.00655572	0.0357575	-0.00988035	-0.00735411	0.0110903	-0.0161194
15	-0.000928233	-7.83614e-05	-0.000134767	0.00464491	-0.00460335	0.00295934	0.00174757	0.0140888	-0.00584173	-0.000182591	0.000565163	0.000740601	-0.00318539	-0.00988035	0.012098	-0.000813359	-0.00211613	0.00877234
16	0.00329517	0.0156982	-0.000408654	-0.0370711	-0.000392597	0.00456266	-0.0350265	-0.00269089	-0.00751243	-0.0293435	-4.81735e-05	-0.00253344	0.0432169	-0.00735411	-0.000813359	0.0569964	0.0062539	-0.0233867
17	-0.00324641	0.0118559	0.00382571	-0.0094948	0.00971685	-0.00309188	-0.0047856	-0.0100639	-0.00892791	-0.0126046	0.00718661	-0.00590259	0.00395701	0.0110903	-0.00211613	0.0062539	0.0326284	-0.0106738
18	-0.00960878	0.00320417	0.0014123	0.0188571	-0.0116477	0.0213699	0.0249544	0.0335304	-0.0285517	0.00271839	0.00718875	-0.00209643	-0.0162507	-0.0161194	0.00877234	-0.0233867	-0.0106738	0.0862911
