# Supplementary material for: Time-varying asymmetry and tail thickness in long series of daily financial returns
Source: publisher site journal article supplement (doi:10.1515/snde-2017-0071), 2018-10-02
Supplement: Supplementary file 391 [file cvm_c2.xlsx]

## Sheet: 1
	Var1	Var2	Var3
1	1.22552	-0.113018	0.00395482
2	-0.113018	0.235649	-0.0280758
3	0.00395482	-0.0280758	0.00466007
