# Supplementary material for: Time-varying asymmetry and tail thickness in long series of daily financial returns
Source: publisher site journal article supplement (doi:10.1515/snde-2017-0071), 2018-10-02
Supplement: Supplementary file 393 [file cvm_c3.xlsx]

## Sheet: 1
	Var1	Var2	Var3
1	0.54705	-0.00985251	0.00278641
2	-0.00985251	0.000955912	-0.00342161
3	0.00278641	-0.00342161	0.0696506
