# Supplementary material for: Time-varying asymmetry and tail thickness in long series of daily financial returns
Source: publisher site journal article supplement (doi:10.1515/snde-2017-0071), 2018-10-02
Supplement: Supplementary file 395 [file cvm_s0.xlsx]

## Sheet: 1
	Var1	Var2	Var3	Var4	Var5	Var6	Var7	Var8	Var9	Var10	Var11	Var12
1	0.0161923	0	0	0	0	0	0	0	0	0	0	0
2	-0.176985	1.95937	0	0	0	0	0	0	0	0	0	0
3	0.000714752	-0.000513808	0.0142044	0	0	0	0	0	0	0	0	0
4	0.01635	0.00633368	-0.0251102	0.143791	0	0	0	0	0	0	0	0
5	0.0140067	0.00600095	0.00229416	0.0576176	0.0513149	0	0	0	0	0	0	0
6	-0.0118997	-0.00477277	0.0068692	-0.0700076	-0.0310106	0.0347318	0	0	0	0	0	0
7	0.0383429	-0.0218352	-0.00841284	0.0259361	0.0735522	-0.264783	0.200148	0	0	0	0	0
8	0.0684415	-0.377834	-0.12628	0.0803113	0.0783312	-0.343748	0.141606	0.672075	0	0	0	0
9	-0.00223396	0.00156899	-0.0195227	0.000372318	-0.000792241	-0.00359332	-0.00144976	0.000135577	0.00821502	0	0	0
10	-0.0185997	0.0313048	-5.1006e-05	-0.0299128	-0.000333547	-0.0398769	-0.0352841	-0.0176676	0.0116416	0.106278	0	0
11	-0.00228626	-0.0470222	0.0189862	-0.00752914	-0.0055651	-0.0102379	-0.0047764	-0.0195113	-0.0343125	-0.0878711	0.136287	0
12	-0.000570495	0.00543651	-0.000199255	-0.00452899	-0.00162824	-0.00325119	-0.00289864	-0.000110384	-0.000952182	0.0172334	-0.0122832	0.0131391
