# Supplementary material for: Time-varying asymmetry and tail thickness in long series of daily financial returns
Source: publisher site journal article supplement (doi:10.1515/snde-2017-0071), 2018-10-02
Supplement: Supplementary file 397 [file cvm_s1.xlsx]

## Sheet: 1
	Var1	Var2	Var3	Var4	Var5	Var6	Var7	Var8	Var9	Var10	Var11	Var12	Var13	Var14	Var15	Var16	Var17	Var18
1	0.186497	0	0	0	0	0	0	0	0	0	0	0	0	0	0	0	0	0
2	-0.197159	0.160758	0	0	0	0	0	0	0	0	0	0	0	0	0	0	0	0
3	-0.0106698	-0.00270195	0.0657014	0	0	0	0	0	0	0	0	0	0	0	0	0	0	0
4	-0.0448629	-0.128475	0.0126332	0.207272	0	0	0	0	0	0	0	0	0	0	0	0	0	0
5	0.000752698	0.0340868	0.0268691	0.0149883	0.135303	0	0	0	0	0	0	0	0	0	0	0	0	0
6	0.00435612	0.0333905	0.00236894	0.0118219	-0.0106388	0.145481	0	0	0	0	0	0	0	0	0	0	0	0
7	-0.0426773	-0.0931925	0.00144132	0.168791	0.0266242	0.0485021	0.167145	0	0	0	0	0	0	0	0	0	0	0
8	0.0150046	-0.0189033	-0.0357406	0.0425413	-0.063023	0.0869762	-0.0145838	0.186769	0	0	0	0	0	0	0	0	0	0
9	0.00727891	-0.020888	-0.0138185	-0.0215901	0.0260303	-0.0620479	-0.00759505	-0.0307255	0.201988	0	0	0	0	0	0	0	0	0
10	0.125259	-0.163014	-0.0170425	0.0463293	-0.00643838	-0.0287183	0.0161187	-0.00814482	0.0210765	0.0799385	0	0	0	0	0	0	0	0
11	-0.099753	0.0680775	-0.00547817	0.0122481	-0.00134622	-0.00423368	0.00689175	-0.00285333	-0.0174022	-0.0121139	0.0985863	0	0	0	0	0	0	0
12	0.00701518	-0.00836243	-0.0504302	0.0150545	-0.0205448	-0.0154294	-0.00371014	-0.00358733	0.0104246	0.00791087	0.018047	0.0698071	0	0	0	0	0	0
13	0.00450249	0.129842	-0.0246405	-0.12827	-0.00670121	0.0188492	-0.0623113	0.00824999	-0.0307763	-0.0676468	-0.0655609	-0.0195493	0.113003	0	0	0	0	0
14	0.00329582	-0.0188385	0.0502949	-0.0341822	0.051011	-0.0914242	0.00729404	-0.0606481	-0.0249168	0.0132774	0.0329245	0.000669903	-0.0172284	0.121751	0	0	0	0
15	-0.00497721	-0.00659169	-0.00313057	0.0174375	-0.0336442	0.0181774	-0.0119884	0.0498424	-0.0107232	-0.00455724	0.00305702	0.00166525	-0.0201691	-0.0279436	0.0793097	0	0	0
16	0.0176688	0.119321	0.00155654	-0.101164	-0.022163	0.0100219	-0.0357494	0.00465292	-0.0308983	-0.07483	-0.0642387	0.0229007	0.0205867	-0.028197	-0.00813414	0.133524	0	0
17	-0.0174073	0.052401	0.0575569	-0.0206042	0.0495636	-0.028397	0.0167964	-0.000214229	-0.0509301	0.00447851	0.0146938	-0.0180138	-0.0241646	0.00870025	0.00369388	0.00756593	0.135692	0
18	-0.0515225	-0.0432575	0.0113497	0.0523212	-0.0829513	0.14786	0.0293971	0.0749921	-0.0689775	0.0649606	0.0459262	-0.0283701	-0.00719595	0.0192028	-0.0208711	-0.0584787	-0.043171	0.160112
