# Supplementary material for: Time-varying asymmetry and tail thickness in long series of daily financial returns
Source: publisher site journal article supplement (doi:10.1515/snde-2017-0071), 2018-10-02
Supplement: Supplementary file 399 [file cvm_s2.xlsx]

## Sheet: 1
	Var1	Var2	Var3
1	1.10703	0	0
2	-0.102091	0.474581	0
3	0.00357245	-0.0583906	0.035183
