# Supplementary material for: Time-varying asymmetry and tail thickness in long series of daily financial returns
Source: publisher site journal article supplement (doi:10.1515/snde-2017-0071), 2018-10-02
Supplement: Supplementary file 403 [file cvm_sp.xlsx]

## Sheet: 1
	Var1	Var2	Var3	Var4	Var5	Var6	Var7	Var8	Var9	Var10	Var11	Var12
1	0.000316806	0.000155425	-4.55616e-05	0.000207981	0.000149856	-9.9766e-05	-0.000223204	-3.75839e-06	6.46201e-05	1.33764e-05	4.20465e-05	-4.53968e-05
2	0.000155425	3.07209	4.65725e-05	-0.0013613	-0.000603838	0.00450086	-0.0315123	-0.130345	-0.000384915	0.000213184	0.00601461	1.78611e-05
3	-4.55616e-05	4.65725e-05	0.000383886	-0.00124936	-8.1499e-05	0.00028986	0.000133711	-4.78297e-05	-0.000565421	-7.13789e-05	-8.28674e-05	-2.23346e-06
4	0.000207981	-0.0013613	-0.00124936	0.0304266	0.00709969	-0.0103757	0.00461223	0.00825888	0.00187232	-9.98742e-06	-0.000692125	4.53258e-06
5	0.000149856	-0.000603838	-8.1499e-05	0.00709969	0.00731434	-0.00589641	0.00448606	0.00275657	2.62693e-05	-0.00111569	-0.000417556	4.64674e-08
6	-9.9766e-05	0.00450086	0.00028986	-0.0103757	-0.00589641	0.0068961	-0.00981745	-0.00373036	-0.000482453	-0.000402126	0.000106813	-1.35933e-05
7	-0.000223204	-0.0315123	0.000133711	0.00461223	0.00448606	-0.00981745	0.049111	0.00468234	-0.000165774	-0.000274631	-0.00169938	0.000140238
8	-3.75839e-06	-0.130345	-4.78297e-05	0.00825888	0.00275657	-0.00373036	0.00468234	0.348863	0.00018783	0.000571716	-0.00279008	0.000626062
9	6.46201e-05	-0.000384915	-0.000565421	0.00187232	2.62693e-05	-0.000482453	-0.000165774	0.00018783	0.00094165	0.000268386	6.84696e-05	-3.75364e-05
10	1.33764e-05	0.000213184	-7.13789e-05	-9.98742e-06	-0.00111569	-0.000402126	-0.000274631	0.000571716	0.000268386	0.0146692	-0.00402249	0.00197336
11	4.20465e-05	0.00601461	-8.28674e-05	-0.000692125	-0.000417556	0.000106813	-0.00169938	-0.00279008	6.84696e-05	-0.00402249	0.0199171	-0.00247802
12	-4.53968e-05	1.78611e-05	-2.23346e-06	4.53258e-06	4.64674e-08	-1.35933e-05	0.000140238	0.000626062	-3.75364e-05	0.00197336	-0.00247802	0.000802283
