# Supplementary material for: Time-varying asymmetry and tail thickness in long series of daily financial returns
Source: publisher site journal article supplement (doi:10.1515/snde-2017-0071), 2018-10-02
Supplement: Supplementary file 407 [file drawcvm0.xlsx]

## Sheet: 1
	Var1	Var2	Var3	Var4	Var5	Var6	Var7	Var8	Var9	Var10	Var11	Var12
1	0.000283001	0.000464508	-4.11155e-05	0.000241428	9.65836e-05	-2.61597e-05	-0.00114549	0.00044388	-7.56278e-05	-3.64143e-06	8.82746e-06	0.000272953
2	0.000464508	0.0266317	-0.000182621	0.00891323	0.00282543	-0.00362965	0.00236883	0.00381388	0.00229258	-0.00244596	-0.00767687	-0.00416259
3	-4.11155e-05	-0.000182621	0.000295241	-0.00138205	-0.000201448	0.000281046	0.000461322	-0.00242726	-0.00050832	0.000480235	0.000198892	0.000211202
4	0.000241428	0.00891323	-0.00138205	0.0297909	0.00811405	-0.011014	0.00633954	0.0266454	0.00563462	-0.00188122	-0.00764801	-0.00705972
5	9.65836e-05	0.00282543	-0.000201448	0.00811405	0.00582247	-0.0050934	0.00417421	0.00556918	0.000668901	-0.000924325	-0.00105891	-0.000909049
6	-2.61597e-05	-0.00362965	0.000281046	-0.011014	-0.0050934	0.00720336	-0.0171795	-0.00561411	-0.000983219	-0.00045447	0.000321118	0.000589324
7	-0.00114549	0.00236883	0.000461322	0.00633954	0.00417421	-0.0171795	0.14394	-0.013098	-0.00798638	-0.00302665	0.0189676	0.0173266
8	0.00044388	0.00381388	-0.00242726	0.0266454	0.00556918	-0.00561411	-0.013098	0.101192	0.00555961	-0.00638786	-0.00349788	-0.00439379
9	-7.56278e-05	0.00229258	-0.00050832	0.00563462	0.000668901	-0.000983219	-0.00798638	0.00555961	0.00609563	0.0015124	-0.00783946	-0.010101
10	-3.64143e-06	-0.00244596	0.000480235	-0.00188122	-0.000924325	-0.00045447	-0.00302665	-0.00638786	0.0015124	0.0170326	-0.00742027	-0.0011204
11	8.82746e-06	-0.00767687	0.000198892	-0.00764801	-0.00105891	0.000321118	0.0189676	-0.00349788	-0.00783946	-0.00742027	0.0265526	0.0129327
12	0.000272953	-0.00416259	0.000211202	-0.00705972	-0.000909049	0.000589324	0.0173266	-0.00439379	-0.010101	-0.0011204	0.0129327	0.0216043
