# Supplementary material for: Time-varying asymmetry and tail thickness in long series of daily financial returns
Source: publisher site journal article supplement (doi:10.1515/snde-2017-0071), 2018-10-02
Supplement: Supplementary file 409 [file es.xlsx]

## Sheet: 1
	Var1
1	-0.787403
2	2
3	-0.931793
4	-3.56645
5	-1.07912
6	-2.39505
7	-1.1093
8	-1.03005
9	-1.04147
10	-0.873645
11	-0.827127
12	-1.31795
13	-0.834685
14	-2.7608
15	-0.893289
16	-1.27437
17	-1.24493
18	-0.8205
19	-1.54567
20	-3.23934
21	-1.75248
22	-1.07219
23	-0.925672
24	-2.20652
25	-1.18514
26	-0.792192
27	-1.14141
28	-0.870838
29	-3.59998
30	-1.1127
31	-0.90089
32	-0.860478
33	-2.12699
34	-0.881255
35	-1.24641
36	-1.01943
37	-0.811739
38	-1.43251
39	-1.59283
40	-0.851337
41	-1.64051
42	-1.30689
43	-1.38595
44	-0.873303
45	-1.70454
46	-2.60394
47	-1.0791
48	-1.28895
49	-1.09544
50	-1.3724
51	-1.52867
52	-1.29298
53	-0.87273
54	-1.04578
55	-1.57251
56	-1.14325
57	-0.916974
58	-1.2732
59	-1.04091
60	-1.44131
61	-0.856845
62	-0.968092
63	-0.903119
64	-1.01349
65	-2.27433
66	-1.19009
67	-1.38474
68	-0.996762
69	-1.06963
70	-1.1547
71	-1.4577
72	-0.900418
73	-1.05478
74	-1.81063
75	-1.84301
76	-1.10258
77	-1.00259
78	-0.896933
79	-1.75449
80	-0.804512
81	-1.01906
82	-0.942367
83	-2.28913
84	-1.45907
85	-1.63151
86	-0.825257
87	-0.886956
88	-1.33721
89	-0.958922
90	-0.914817
91	-1.02859
92	-0.813513
93	-1.29764
94	-1.6321
95	-1.92205
96	-0.795302
97	-1.02669
98	-2.42859
99	-4.00026
100	-1.72173
101	-0.812833
102	-1.4761
103	-0.898217
104	-1.06925
105	-1.03601
106	-0.898067
107	-0.968324
108	-1.46559
109	-1.11097
110	-0.921955
111	-0.995003
112	-0.90101
113	-1.25246
114	-0.991858
115	-0.925186
116	-1.13955
117	-2.38893
118	-0.934871
119	-0.813839
120	-1.66222
121	-1.05691
122	-1.35594
123	-0.810857
124	-0.944841
125	-1.03633
126	-1.92971
127	-1.17019
128	-2.76478
129	-1.3552
130	-1.01115
131	-1.5492
132	-1.09743
133	-1.00278
134	-0.807373
135	-0.960313
136	-1.41449
137	-0.879613
138	-1.22239
139	-1.17193
140	-0.928483
141	-1.40806
142	-0.862568
143	-0.886357
144	-1.31917
145	-2.22266
146	-0.817309
147	-1.67293
148	-2.08653
149	-0.86618
150	-1.12812
151	-2.32294
152	-0.797382
153	-0.864689
154	-1.4513
155	-1.21673
156	-2.36697
157	-1.17712
158	-1.10886
159	-1.30466
160	-0.872215
161	-0.811179
162	-1.10692
163	-0.858335
164	-1.30362
165	-1.6478
166	-1.12718
167	-0.887968
168	-0.885643
169	-1.48563
170	-0.844931
171	-1.67451
172	-0.818813
173	-0.909566
174	-1.16594
175	-0.847383
176	-0.850783
177	-1.37611
178	-1.32055
179	-1.51137
180	-1.42238
181	-1.10129
182	-1.86806
183	-0.812311
184	-0.809467
185	-0.857736
186	-0.876441
187	-1.04752
188	-1.18333
189	-0.869402
190	-0.789663
191	-0.806148
192	-2.06498
193	-0.953378
194	-1.46325
195	-1.45337
196	-0.880784
197	-1.81546
198	-1.67146
199	-1.8533
200	-1.0998
201	-1.53213
202	-1.30789
203	-1.20681
204	-0.882167
205	-1.07674
206	-0.813067
207	-3.08781
208	-0.921374
209	-0.950381
210	-1.79456
211	-1.26387
212	-1.94681
213	-1.40578
214	-1.10526
215	-1.94223
216	-0.926752
217	-1.48254
218	-1.79613
219	-0.844956
220	-0.992059
221	-0.851916
222	-1.02815
223	-1.02492
224	-2.99731
225	-0.955035
226	-1.18465
227	-1.3098
228	-1.14974
229	-0.810906
230	-1.31453
231	-1.27662
232	-1.40812
233	-1.10862
234	-0.831923
235	-0.902911
236	-0.804944
237	-1.13739
238	-1.36126
239	-0.945926
240	-3.4476
241	-0.815893
242	-1.17652
243	-0.792235
244	-0.848116
245	-0.867828
246	-0.905753
247	-0.84163
248	-1.31368
249	-1.71071
250	-0.840133
251	-0.833593
252	-1.40725
253	-2.21849
254	-1.23182
255	-1.26412
256	-0.99275
257	-1.04654
258	-1.98974
259	-0.847877
260	-2.9762
261	-1.54301
262	-1.16008
263	-1.28207
264	-1.27156
265	-2.53426
266	-1.6417
267	-1.33346
268	-1.11105
269	-1.06064
270	-2.84775
271	-1.25768
272	-0.915408
273	-0.913907
274	-1.0978
275	-1.07828
276	-1.09792
277	-0.858864
278	-0.798673
279	-1.61222
280	-2.0397
281	-0.839652
282	-3.00782
283	-0.976627
284	-1.04805
285	-1.24057
286	-1.07217
287	-1.12302
288	-0.881676
289	-3.12401
290	-0.833392
291	-1.24657
292	-1.29067
293	-1.40522
294	-2.12196
295	-1.61974
296	-1.37341
297	-1.2284
298	-1.20784
299	-1.07457
300	-1.3545
301	-0.861089
302	-1.7431
303	-1.39567
304	-1.3449
305	-1.2764
306	-1.171
307	-1.69866
308	-1.1098
309	-1.04383
310	-1.25093
311	-1.03332
312	-2.01847
313	-0.927996
314	-1.51895
315	-1.00779
316	-0.855436
317	-1.04133
318	-3.06943
319	-3.38601
320	-1.27484
321	-2.07295
322	-0.824727
323	-1.476
324	-0.988033
325	-2.08636
326	-0.875277
327	-0.797639
328	-0.927522
329	-1.91956
330	-0.905948
331	-1.02461
332	-1.06923
333	-1.03907
334	-1.10879
335	-0.910532
336	-1.04318
337	-1.4442
338	-1.74227
339	-1.08777
340	-1.8764
341	-1.17297
342	-2.95172
343	-0.81887
344	-0.916479
345	-2.1577
346	-1.35303
347	-1.77392
348	-1.05661
349	-0.876132
350	-3.49814
351	-2.68005
352	-2.2008
353	-1.17489
354	-0.855749
355	-0.915667
356	-1.06512
357	-1.30741
358	-0.865868
359	-2.49394
360	-1.03222
361	-1.93119
362	-1.08054
363	-0.857671
364	-1.41656
365	-0.823287
366	-1.40095
367	-0.8737
368	-1.53968
369	-1.02556
370	-1.49915
371	-0.826901
372	-1.03603
373	-0.908046
374	-0.788362
375	-0.876858
376	-0.910701
377	-1.20548
378	-1.38906
379	-1.47734
380	-1.1423
381	-0.873135
382	-1.30726
383	-1.03547
384	-0.976878
385	-1.27753
386	-1.3314
387	-1.91646
388	-0.983121
389	-3.27414
390	-1.98592
391	-1.82541
392	-0.975385
393	-1.64647
394	-0.800652
395	-0.832925
396	-1.10631
397	-0.963719
398	-0.846596
399	-1.74671
400	-1.04694
401	-2.64413
402	-1.82688
403	-1.69941
404	-1.00231
405	-1.5475
406	-1.3072
407	-2.2773
408	-0.934611
409	-1.02138
410	-1.24825
411	-1.25034
412	-0.841045
413	-0.800511
414	-1.02493
415	-0.869925
416	-2.41294
417	-1.31456
418	-1.50385
419	-1.40121
420	-1.42158
421	-1.08658
422	-1.06492
423	-1.19452
424	-1.416
425	-1.91874
426	-1.5001
427	-0.876324
428	-2.71029
429	-0.82279
430	-1.00678
431	-2.00667
432	-1.51758
433	-0.890691
434	-0.803783
435	-1.98484
436	-0.974864
437	-0.900958
438	-1.17815
439	-1.67686
440	-1.47505
441	-1.35336
442	-1.13557
443	-1.75116
444	-1.06949
445	-1.01426
446	-1.57892
447	-2.32677
448	-1.13541
449	-0.847229
450	-1.10492
451	-1.53474
452	-2.57519
453	-1.69965
454	-1.09373
455	-1.10161
456	-0.87656
457	-0.886693
458	-2.45071
459	-1.07006
460	-1.87119
461	-0.952321
462	-1.07223
463	-2.82828
464	-1.07262
465	-1.06528
466	-2.24318
467	-0.910426
468	-1.42487
469	-1.25639
470	-2.17883
471	-0.978135
472	-1.60099
473	-0.899824
474	-0.935021
475	-2.05692
476	-0.910124
477	-1.38738
478	-1.25797
479	-1.24797
480	-1.15929
481	-1.08598
482	-1.61741
483	-0.855492
484	-0.820037
485	-1.37239
486	-1.44369
487	-1.10883
488	-1.69379
489	-0.805652
490	-1.19546
491	-1.59681
492	-1.16939
493	-0.914628
494	-0.807392
495	-0.848952
496	-1.04623
497	-0.972679
498	-1.41656
499	-0.801343
500	-0.813394
501	-1.85077
502	-1.6571
503	-1.00485
504	-1.16673
505	-1.30306
506	-0.878066
507	-1.27167
508	-4.87993
509	-1.19109
510	-1.24531
511	-1.18938
512	-1.32513
513	-1.22387
514	-0.886393
515	-1.2812
516	-2.49015
517	-0.831231
518	-0.90802
519	-1.7189
520	-1.42777
521	-0.954917
522	-1.20712
523	-2.05701
524	-0.925022
525	-0.869289
526	-0.979269
527	-0.837126
528	-1.64529
529	-1.5573
530	-1.37609
531	-1.2932
532	-1.57048
533	-0.837292
534	-1.39228
535	-1.12875
536	-0.952157
537	-1.37297
538	-1.46039
539	-0.903595
540	-1.25713
541	-1.45368
542	-0.805409
543	-0.82186
544	-1.09534
545	-1.26191
546	-0.994953
547	-1.81107
548	-0.883025
549	-1.34137
550	-1.51706
551	-1.3473
552	-1.47864
553	-1.99793
554	-1.6359
555	-0.839283
556	-0.827454
557	-1.08961
558	-1.08188
559	-0.901756
560	-0.847022
561	-0.861693
562	-0.872291
563	-1.46545
564	-0.823305
565	-0.856239
566	-1.07164
567	-1.97312
568	-1.29634
569	-0.953468
570	-1.56042
571	-0.810903
572	-1.04011
573	-0.937699
574	-0.848267
575	-1.34518
576	-0.892047
577	-1.0338
578	-1.0158
579	-1.05253
580	-1.27534
581	-1.49013
582	-1.24203
583	-1.57354
584	-1.03287
585	-0.860244
586	-1.41924
587	-0.788939
588	-2.1331
589	-1.91694
590	-1.47295
591	-1.377
592	-1.81137
593	-1.43462
594	-0.86188
595	-0.840205
596	-1.38055
597	-1.13672
598	-1.23142
599	-1.3517
600	-0.930313
601	-1.73727
602	-1.03137
603	-1.52893
604	-1.59261
605	-1.34764
606	-1.31256
607	-1.33934
608	-0.905085
609	-1.12554
610	-0.912053
611	-0.817305
612	-1.6466
613	-1.13001
614	-0.83576
615	-2.01907
616	-2.72321
617	-0.838567
618	-1.38392
619	-0.817018
620	-1.04598
621	-0.936911
622	-1.91191
623	-2.95656
624	-0.905912
625	-1.55072
626	-1.52066
627	-2.42837
628	-1.46284
629	-0.833859
630	-1.0444
631	-2.13003
632	-1.08829
633	-1.43566
634	-2.03071
635	-1.61484
636	-1.06201
637	-1.76945
638	-0.899255
639	-0.806219
640	-1.10272
641	-0.824623
642	-1.38576
643	-1.12243
644	-1.1175
645	-1.21319
646	-0.958395
647	-1.04248
648	-1.48978
649	-0.822676
650	-1.00916
651	-1.22695
652	-1.59279
653	-1.78765
654	-2.12964
655	-1.08096
656	-1.1354
657	-1.61307
658	-1.24389
659	-0.787648
660	-1.22169
661	-2.14022
662	-0.985014
663	-1.94738
664	-1.70975
665	-0.886778
666	-1.24068
667	-1.46138
668	-2.45129
669	-0.83582
670	-1.07366
671	-1.86928
672	-0.820952
673	-0.971359
674	-1.46526
675	-1.19595
676	-1.03892
677	-1.37986
678	-1.07105
679	-3.08584
680	-1.31451
681	-1.14107
682	-0.897586
683	-2.96022
684	-1.15268
685	-0.828429
686	-3.02766
687	-1.23124
688	-1.27239
689	-1.49067
690	-0.99647
691	-1.17611
692	-0.898588
693	-1.13697
694	-1.09557
695	-3.04861
696	-0.954025
697	-1.17009
698	-1.37911
699	-1.12013
700	-3.934
701	-0.954369
702	-0.818446
703	-0.919806
704	-1.18847
705	-0.913788
706	-1.05977
707	-0.99138
708	-1.64234
709	-1.51407
710	-1.42461
711	-1.58842
712	-1.93286
713	-0.89367
714	-1.59978
715	-1.83464
716	-1.83326
717	-1.85439
718	-1.18765
719	-1.07003
720	-1.6977
721	-0.789018
722	-1.34442
723	-1.00544
724	-0.866925
725	-1.50412
726	-0.994358
727	-0.92387
728	-1.4639
729	-0.951703
730	-1.33916
731	-0.816375
732	-1.12421
733	-1.2184
734	-1.01338
735	-1.11171
736	-0.834073
737	-1.00734
738	-0.82617
739	-1.11003
740	-0.907859
741	-1.13528
742	-1.91726
743	-1.15649
744	-0.862613
745	-1.97511
746	-0.809876
747	-0.926822
748	-0.834542
749	-2.24587
750	-1.18802
751	-0.809274
752	-0.870589
753	-0.948559
754	-1.3333
755	-0.857035
756	-2.02609
757	-0.816888
758	-1.12239
759	-1.36861
760	-1.4451
761	-1.06872
762	-1.6412
763	-0.908687
764	-1.29876
765	-1.29142
766	-1.12584
767	-1.00513
768	-1.07451
769	-1.52278
770	-1.16022
771	-1.48013
772	-1.94705
773	-1.38197
774	-0.967501
775	-1.23271
776	-1.47056
777	-0.895555
778	-1.0634
779	-0.795972
780	-0.845968
781	-1.41294
782	-2.29364
783	-1.38119
784	-1.06199
785	-1.18474
786	-1.66486
787	-3.34264
788	-2.24652
789	-1.44652
790	-1.1333
791	-2.03217
792	-1.49851
793	-0.917568
794	-0.883301
795	-1.42296
796	-1.7198
797	-1.11063
798	-1.38395
799	-1.65397
800	-1.6979
801	-0.829916
802	-1.18695
803	-0.980232
804	-1.37126
805	-0.877909
806	-1.19014
807	-0.848172
808	-1.13963
809	-1.2565
810	-0.912992
811	-1.26708
812	-1.15721
813	-1.10294
814	-2.5751
815	-2.01412
816	-1.00193
817	-1.27314
818	-1.47524
819	-1.57787
820	-0.863381
821	-0.962173
822	-1.11259
823	-0.946017
824	-1.0231
825	-1.12648
826	-0.946642
827	-1.09422
828	-2.92506
829	-2.22541
830	-2.20246
831	-0.986312
832	-1.26365
833	-1.09125
834	-1.03947
835	-0.854311
836	-1.00831
837	-0.896324
838	-0.900109
839	-0.794639
840	-1.27312
841	-1.13041
842	-1.15854
843	-0.990235
844	-0.931636
845	-1.22404
846	-2.20403
847	-0.967199
848	-1.55564
849	-1.00207
850	-0.97928
851	-1.15045
852	-1.2924
853	-1.37188
854	-1.12491
855	-3.37683
856	-2.83769
857	-0.800181
858	-2.57665
859	-0.891745
860	-1.34481
861	-1.99153
862	-2.01732
863	-1.60522
864	-1.06842
865	-1.47763
866	-0.809897
867	-2.64378
868	-1.42181
869	-1.31949
870	-1.06836
871	-1.18004
872	-1.10033
873	-1.77669
874	-1.10128
875	-0.902073
876	-1.60819
877	-2.02051
878	-0.796807
879	-1.85244
880	-1.42503
881	-0.964659
882	-0.921458
883	-2.27488
884	-1.66443
885	-1.59185
886	-1.50814
887	-1.3559
888	-0.806299
889	-1.25379
890	-1.00901
891	-1.34891
892	-0.855732
893	-1.88421
894	-1.0154
895	-1.34725
896	-0.950989
897	-1.00305
898	-1.87874
899	-1.36447
900	-1.40463
901	-1.68921
902	-1.05178
903	-0.813519
904	-0.988118
905	-1.44424
906	-0.992079
907	-9.2797
908	-0.954311
909	-1.13849
910	-1.52041
911	-0.837965
