# Supplementary material for: Time-varying asymmetry and tail thickness in long series of daily financial returns
Source: publisher site journal article supplement (doi:10.1515/snde-2017-0071), 2018-10-02
Supplement: Supplementary file 411 [file l_1.xlsx]

## Sheet: 1
	Var1	Var2	Var3	Var4	Var5	Var6	Var7	Var8	Var9	Var10	Var11	Var12	Var13	Var14	Var15	Var16	Var17	Var18	Var19	Var20	Var21	Var22	Var23	Var24	Var25
1	1.43105e-05	1.9217e-05	2.16966e-05	3.47893e-05	2.55415e-05	2.10185e-05	1.20106e-05	1.01396e-05	3.41997e-05	2.05896e-05	4.20371e-05	2.52223e-05	3.88035e-05	4.92142e-05	1.95901e-05	2.14658e-05	1.97822e-05	4.11792e-05	2.84194e-05	5.93465e-05	3.88035e-05	0.000100889	3.95643e-05	5.76509e-05	2.91727e-05
2	-7.06675	-7.00525	-6.95575	-6.918	-6.88375	-6.84	-6.774	-6.68225	-6.61775	-6.5785	-6.542	-6.51	-6.477	-6.45375	-6.41775	-6.3685	-6.3195	-6.28175	-6.25175	-6.2255	-6.204	-6.186	-6.16825	-6.14675	-6.11725
3	5	5	5	5	5	5	5	5	5	5	5	5	5	5	5	5	5	5	5	5	5	5	5	5	6
4	-7.102	-7.0315	-6.979	-6.9325	-6.9035	-6.864	-6.816	-6.732	-6.6325	-6.603	-6.554	-6.53	-6.49	-6.464	-6.4435	-6.392	-6.345	-6.294	-6.2695	-6.234	-6.217	-6.191	-6.181	-6.1555	-6.138
