# Supplementary material for: Time-varying asymmetry and tail thickness in long series of daily financial returns
Source: publisher site journal article supplement (doi:10.1515/snde-2017-0071), 2018-10-02
Supplement: Supplementary file 413 [file l_2.xlsx]

## Sheet: 1
	Var1	Var2	Var3	Var4	Var5	Var6	Var7	Var8	Var9	Var10	Var11	Var12	Var13	Var14	Var15	Var16	Var17	Var18	Var19	Var20	Var21
1	9.52873e-08	4.84165e-07	6.79097e-07	2.50559e-06	1.95583e-06	4.52852e-06	1.12596e-05	1.61575e-05	3.87161e-06	2.63955e-06	7.48363e-06	6.24399e-06	7.48724e-06	9.31498e-06	1.63914e-05	9.20761e-06	3.06657e-05	1.22051e-05	2.55589e-05	1.12765e-05	0
2	-19.5239	-13.188	-11.4033	-10.4592	-9.99995	-9.63064	-9.47445	-9.39843	-9.23691	-8.87729	-8.56706	-8.37307	-8.16564	-7.98467	-7.84879	-7.70093	-7.57271	-7.46044	-7.3383	-7.20042	0
3	5	5	5	5	5	5	5	5	5	6	6	7	7	8	8	9	9	10	10	11	0
4	-24.8178	-14.2299	-12.1462	-10.6605	-10.2579	-9.74203	-9.51925	-9.42965	-9.36721	-9.10662	-8.64795	-8.48618	-8.25997	-8.07132	-7.89803	-7.79955	-7.60232	-7.5431	-7.37778	-7.29883	-7.102
