# Supplementary material for: Time-varying asymmetry and tail thickness in long series of daily financial returns
Source: publisher site journal article supplement (doi:10.1515/snde-2017-0071), 2018-10-02
Supplement: Supplementary file 415 [file mpes.xlsx]

## Sheet: 1
	Var1	Var2
1	0	-0.590667
2	0	1.38142
3	0	0.490925
4	0	0.252718
5	0	0.558999
6	0	-0.00929021
7	0	0.395643
8	0	0.334023
9	0	-0.671437
10	0	-0.32279
11	0	0.147139
12	1	-1.13041
13	0	-0.281164
14	0	0.521334
15	1	-1.27312
16	0	0.168327
17	0	0.151584
18	0	-0.610553
19	1	-1.15045
20	0	-0.146074
21	0	-0.042998
22	0	-0.524968
23	0	-0.628448
24	0	0.966605
25	0	0.194503
26	0	0.94382
27	0	0.354175
28	0	-0.700414
29	0	-0.610062
30	0	-0.161438
31	1	-1.26365
32	0	0.144559
33	0	-0.376044
34	0	1.15045
35	0	0.901912
36	1	-2.22541
37	0	-0.00606105
38	0	0.709733
39	1	-0.794639
40	0	-0.361586
41	0	2.33775
42	0	0.0276709
43	0	0.204914
44	0	0.630657
45	0	-0.408128
46	0	-0.391339
47	0	1.11816
48	0	0.186182
49	0	0.0915633
50	0	0.146668
51	0	0.792724
52	0	1.0708
53	0	1.63413
54	0	0.106375
55	0	-0.141052
56	0	-0.00190051
57	0	-0.37614
58	1	-1.10033
59	0	0.20491
60	0	-0.0689489
61	0	0.753673
62	0	-0.500285
63	0	1.42154
64	0	0.551965
65	1	-1.06836
66	0	1.56733
67	0	1.01002
68	1	-0.921458
69	1	-0.964659
70	1	-1.42503
71	1	-1.85244
72	0	0.856587
73	1	-0.796807
74	1	-1.99153
75	0	0.457125
76	0	-0.371531
77	0	1.1256
78	0	0.183539
79	0	0.224
80	0	0.156669
81	0	1.05488
82	0	0.28762
83	0	0.912935
84	0	-0.0153043
85	0	0.173378
86	0	1.01534
87	0	0.309016
88	0	-0.32892
89	1	-3.37683
90	0	0.246992
91	0	0.351771
92	0	-0.185087
93	0	-0.305938
94	1	-0.809897
95	1	-1.06842
96	0	-0.635234
97	0	-0.619836
98	0	-0.490843
99	0	0.385095
100	1	-2.24652
101	0	-0.00519711
102	0	-0.139993
103	0	-0.445647
104	0	-0.0104357
105	0	-0.655235
106	0	-0.647968
107	0	-0.30009
108	0	-0.337861
109	0	-0.0149655
110	0	-0.46145
111	0	1.07917
112	0	-0.682167
113	0	-0.779954
114	0	0.661902
115	0	0.405596
116	0	-0.184643
117	0	0.00302893
118	0	0.00891362
119	1	-1.49851
120	1	-1.1333
121	0	-0.240102
122	0	0.418544
123	0	-0.0569515
124	0	0.204331
125	0	0.776952
126	1	-1.38197
127	0	0.609668
128	0	-0.087169
129	0	0.417446
130	0	0.732135
131	0	0.258911
132	0	0.0785565
133	0	0.564248
134	0	0.0940423
135	0	-0.25663
136	0	0.447731
137	1	-0.895555
138	0	0.109462
139	0	-0.0165071
140	0	0.166383
141	0	-0.317223
142	0	0.343723
143	1	-1.00193
144	0	-0.571798
145	0	0.0455343
146	0	0.210217
147	0	0.421858
148	0	2.25401
149	0	0.172074
150	0	-0.254471
151	0	-0.3901
152	0	-0.637869
153	0	0.283526
154	0	-0.759794
155	1	-1.10294
156	0	0.513581
157	0	0.361442
158	0	-0.702144
159	0	-0.574287
160	1	-1.26708
161	0	-0.648331
162	0	-0.016611
163	0	-0.311801
164	0	-0.417512
165	0	-0.0697257
166	0	-0.429497
167	1	-0.946017
168	0	-0.517343
169	0	0.560385
170	1	-1.11259
171	0	0.938175
172	0	-0.782778
173	0	0.555441
174	0	1.54423
175	0	-0.217189
176	0	1.51676
177	0	0.318926
178	0	-0.183694
179	1	-1.57787
180	0	0.439201
181	0	0.28811
182	0	0.410955
183	1	-1.47524
184	0	-0.0240608
185	1	-0.980232
186	1	-1.18695
187	0	0.867923
188	1	-1.6979
189	0	0.0926455
190	0	0.591109
191	1	-1.38395
192	0	0.983345
193	0	0.320479
194	0	1.12887
195	1	-1.2565
196	0	-0.392216
197	0	-0.588475
198	0	-0.244221
199	0	0.275058
200	1	-1.19014
201	0	0.527722
202	1	-0.877909
203	1	-1.37126
204	0	0.706485
205	0	0.939203
206	0	0.450087
207	0	0.00360212
208	0	1.21999
209	0	0.492441
210	0	0.609789
211	0	-0.650091
212	0	-0.0463715
213	0	0.125359
214	1	-0.806299
215	0	-0.625159
216	0	1.80386
217	0	0.292276
218	0	0.725828
219	0	-0.00319437
220	0	1.18413
221	0	-0.647874
222	0	-0.0832368
223	0	0.681205
224	0	0.0118902
225	0	-0.434647
226	0	-0.0444767
227	0	0.255062
228	0	-0.387728
229	0	-0.0620486
230	0	0.045674
231	0	-0.722662
232	0	0.649342
233	0	0.451052
234	0	0.194361
235	0	1.01872
236	0	0.369519
237	0	0.0374914
238	1	-1.13849
239	0	1.08789
240	0	-0.744946
241	0	-0.0534569
242	0	0.580904
243	0	0.10184
244	0	2.11894
245	0	0.185151
246	0	0.402959
247	0	0.321578
248	0	-0.0892069
249	0	0.743069
250	0	1.44414
251	0	1.29718
252	1	-9.2797
253	0	-0.758439
254	0	-0.748894
255	0	-0.506593
256	0	-0.281346
257	0	1.80308
258	1	-0.813519
259	1	-0.950989
260	0	0.314425
261	0	1.43001
262	1	-1.34725
263	0	-0.00366587
264	0	0.416808
265	0	1.22355
266	0	1.00631
267	1	-1.00901
268	0	0.143609
269	1	-1.44424
270	0	2.05115
271	0	0.341683
272	0	0.345138
273	0	-0.2865
274	0	1.87225
275	0	-0.201467
276	0	0.311627
277	0	0.0589624
278	0	-0.661115
279	0	0.0680758
280	1	-0.901756
281	0	0.366558
282	0	-0.191511
283	0	0.26173
284	0	0.0106806
285	0	0.527636
286	1	-1.6359
287	0	-0.603157
288	0	0.435331
289	0	1.89688
290	0	-0.176883
291	0	0.0346051
292	0	0.860239
293	0	-0.302343
294	0	0.331247
295	0	0.0676209
296	0	0.00489594
297	1	-1.37297
298	0	-0.352545
299	0	0.671121
300	0	0.367376
301	0	1.02518
302	0	0.499307
303	0	0.45676
304	0	0.281872
305	1	-1.2932
306	0	0.338117
307	0	0.139317
308	0	-0.731135
309	1	-0.994953
310	1	-1.81107
311	0	-0.26885
312	0	-0.0670297
313	1	-0.82186
314	0	0.399493
315	0	-0.329792
316	0	-0.580216
317	1	-0.840205
318	0	0.0029024
319	1	-1.38055
320	0	0.956659
321	0	1.08271
322	0	0.191923
323	0	0.43734
324	0	0.598617
325	0	0.118996
326	1	-1.3517
327	0	0.711607
328	0	0.433722
329	0	0.812604
330	1	-1.81137
331	0	0.785777
332	0	0.60866
333	0	-0.23384
334	0	0.114015
335	1	-1.31256
336	0	0.546667
337	0	-0.101509
338	0	0.587349
339	0	0.957945
340	1	-1.12554
341	0	-0.0328497
342	0	-0.0112003
343	0	-0.413955
344	0	0.085322
345	0	0.246237
346	0	0.0667505
347	0	0.509253
348	0	0.0372407
349	1	-1.0338
350	0	0.264551
351	0	1.21273
352	0	0.961314
353	0	-0.29667
354	0	0.354124
355	1	-1.04011
356	1	-0.937699
357	0	-0.655595
358	0	0.0804575
359	0	0.0671526
360	0	-0.424557
361	1	-2.1331
362	1	-1.91694
363	0	0.802351
364	0	0.530182
365	1	-1.24203
366	0	0.4301
367	0	0.523185
368	1	-1.38738
369	0	-0.377473
370	0	0.0140752
371	1	-1.15929
372	0	-0.779765
373	1	-1.08598
374	1	-1.60099
375	0	0.08673
376	0	2.02137
377	0	0.773924
378	0	0.258828
379	0	0.604402
380	0	1.17087
381	0	-0.448452
382	0	1.05299
383	1	-0.910124
384	0	-0.358865
385	0	-0.427174
386	0	0.677293
387	0	-0.371983
388	0	0.477325
389	0	0.562546
390	0	0.929509
391	0	-0.735515
392	0	0.312657
393	0	0.580884
394	0	0.299646
395	0	0.708898
396	1	-1.61741
397	0	0.125996
398	1	-0.820037
399	0	0.689222
400	0	-0.738789
401	0	-0.405663
402	0	0.132485
403	1	-1.44369
404	0	-0.196582
405	0	-0.608077
406	0	0.965333
407	0	-0.282971
408	0	0.0360946
409	1	-1.07006
410	0	0.244371
411	0	-0.0228397
412	0	0.960272
413	0	0.189152
414	1	-1.10161
415	0	0.258347
416	0	1.54708
417	0	0.209561
418	0	0.322713
419	0	0.552795
420	0	-0.536466
421	0	-0.0163285
422	0	-0.0138422
423	0	-0.200597
424	0	0.663801
425	0	0.258361
426	0	-0.37916
427	0	0.830101
428	0	0.770304
429	1	-2.17883
430	0	0.251363
431	0	1.04995
432	0	-0.717643
433	1	-2.82828
434	0	0.0108746
435	0	0.168871
436	0	0.548389
437	0	0.861634
438	0	0.398323
439	0	0.563101
440	0	0.795899
441	0	0.221572
442	0	-0.612049
443	0	0.852268
444	0	-0.158275
445	0	1.10892
446	0	-0.390632
447	1	-1.22387
448	0	1.05221
449	0	-0.536963
450	0	0.386706
451	0	-0.325051
452	1	-1.64529
453	0	0.308979
454	0	-0.316657
455	0	0.377056
456	1	-1.5573
457	0	0.929711
458	0	-0.133926
459	0	-0.712759
460	0	-0.308845
461	0	1.59439
462	1	-0.954917
463	0	-0.358178
464	1	-1.20712
465	0	-0.394691
466	0	-0.240022
467	0	-0.548095
468	0	0.651338
469	0	0.0994818
470	0	0.00945244
471	0	0.265302
472	1	-0.972679
473	0	-0.021951
474	0	1.40669
475	0	-0.153557
476	0	-0.0792155
477	0	0.00907261
478	0	1.57049
479	0	-0.546742
480	0	0.360963
481	1	-0.807392
482	0	-0.19878
483	1	-0.914628
484	0	-0.761483
485	0	0.362939
486	0	0.500117
487	0	0.806139
488	0	-0.12166
489	0	0.144801
490	0	-0.175083
491	0	-0.4204
492	0	-0.650521
493	0	-0.0513714
494	0	1.76701
495	0	-0.509292
496	0	-0.200549
497	0	-0.223465
498	0	-0.0775795
499	0	-0.408737
500	0	0.569778
501	0	0.243966
502	0	-0.152366
503	0	2.13882
504	1	-1.16673
505	0	0.72977
506	0	-0.378334
507	1	-1.30306
508	0	0.137095
509	0	-0.531685
510	1	-1.59978
511	0	0.30329
512	0	-0.719762
513	0	0.0391755
514	0	1.14269
515	1	-1.85439
516	0	0.920759
517	1	-1.42461
518	0	0.617314
519	0	-0.0166401
520	0	0.524542
521	0	0.185675
522	1	-1.00544
523	0	1.20398
524	0	0.046017
525	0	0.323642
526	0	0.886514
527	0	-0.266794
528	0	0.74205
529	0	-0.287365
530	0	0.536903
531	0	-0.118867
532	0	1.3236
533	0	0.202947
534	0	0.0143338
535	0	-0.2272
536	0	0.0676253
537	0	-0.474872
538	0	1.26385
539	0	-0.243655
540	0	0.208294
541	0	0.112416
542	0	1.06641
543	1	-1.07003
544	0	0.609919
545	0	0.377721
546	0	0.421712
547	1	-1.34442
548	0	-0.405188
549	0	3.25056
550	0	1.97651
551	0	0.23265
552	0	-0.0161046
553	1	-3.04861
554	0	1.64025
555	0	0.0960459
556	0	-0.402878
557	0	0.370942
558	0	-0.244924
559	0	0.41274
560	0	0.300523
561	0	0.256604
562	0	0.155681
563	0	-0.467149
564	0	0.212631
565	0	0.503843
566	0	0.0844537
567	1	-0.919806
568	0	-0.732584
569	0	-0.0383892
570	0	-0.0275125
571	0	-0.0729679
572	0	0.902043
573	0	0.695642
574	1	-1.05977
575	1	-0.99138
576	0	-0.0238273
577	1	-1.12013
578	0	0.932404
579	0	0.988127
580	0	-0.452068
581	0	-0.0805716
582	0	4.77457
583	0	0.929981
584	0	0.0411529
585	0	0.391338
586	0	0.0130462
587	0	0.885086
588	0	0.553129
589	1	-2.02609
590	0	-0.493064
591	0	-0.400208
592	1	-2.24587
593	0	-0.255887
594	0	0.868934
595	0	0.493074
596	0	-0.0364825
597	0	0.219075
598	0	0.848117
599	0	0.377554
600	0	0.146162
601	0	-0.641682
602	0	0.854076
603	0	-0.566775
604	0	0.409518
605	0	0.562313
606	1	-1.29142
607	0	0.325398
608	0	-0.678199
609	0	0.788749
610	0	0.0453106
611	0	0.166256
612	0	0.613426
613	0	-0.114948
614	0	0.0110426
615	0	0.126259
616	0	0.0779887
617	0	-0.13524
618	0	0.208581
619	1	-1.6412
620	0	0.704327
621	0	1.32605
622	0	-0.228312
623	0	-0.266145
624	0	0.689005
625	0	-0.413344
626	0	-0.0918043
627	0	-0.259029
628	1	-1.11171
629	0	-0.300626
630	0	0.973161
631	0	-0.581707
632	0	-0.721033
633	0	0.622191
634	0	-0.325884
635	0	0.0918346
636	1	-1.33916
637	1	-0.816375
638	0	0.722618
639	0	1.53646
640	0	0.114464
641	1	-0.862613
642	0	0.353645
643	0	-0.435448
644	0	-0.594999
645	0	0.410147
646	0	0.734969
647	0	0.568899
648	0	0.0623207
649	0	-0.0904544
650	0	0.214124
651	1	-0.82617
652	0	1.25468
653	0	0.0828995
654	0	-0.12074
655	0	-0.697838
656	0	1.50797
657	1	-0.907859
658	1	-1.13528
659	0	-0.446977
660	0	0.18793
661	0	0.0159637
662	0	0.380259
663	0	-0.281975
664	0	0.294065
665	0	-0.172825
666	0	0.0496148
667	0	-0.273221
668	1	-2.03071
669	0	-0.127215
670	0	-0.0163543
671	0	-0.074406
672	1	-1.61484
673	0	-0.0763158
674	0	-0.0818365
675	0	-0.650956
676	0	0.394154
677	0	-0.324985
678	0	-0.459495
679	0	-0.570044
680	1	-1.0444
681	0	0.238288
682	0	0.374405
683	0	0.646358
684	0	0.15929
685	0	-0.475954
686	1	-2.03217
687	0	0.813732
688	0	-0.208182
689	0	0.13988
690	1	-1.43566
691	0	0.180559
692	0	-0.175111
693	0	-0.173446
694	0	0.892529
695	0	0.921444
696	0	1.11062
697	0	-0.138736
698	0	0.919823
699	1	-0.958395
700	0	0.586676
701	0	0.34149
702	0	-0.164574
703	1	-0.824623
704	0	-0.408918
705	1	-1.12243
706	0	2.22733
707	0	0.316794
708	0	0.0337147
709	1	-0.83576
710	1	-2.01907
711	0	-0.691833
712	0	0.754838
713	0	-0.12896
714	1	-1.13001
715	0	0.0787635
716	0	-0.165087
717	0	0.111447
718	0	0.0474589
719	0	-0.00109
720	0	-0.16968
721	0	0.441116
722	0	-0.10799
723	0	-0.710656
724	0	0.07445
725	0	-0.0702765
726	0	1.27055
727	0	0.0860591
728	0	-0.711649
729	0	0.21085
730	0	0.594882
731	1	-1.52066
732	0	1.00072
733	0	0.58645
734	0	0.368188
735	0	0.412714
736	1	-2.42837
737	0	-0.521085
738	0	2.2684
739	0	-0.530345
740	0	0.223867
741	0	0.119044
742	0	-0.709754
743	1	-2.95656
744	1	-1.46526
745	0	-0.0348567
746	0	1.24954
747	0	0.147551
748	0	0.390254
749	0	-0.165842
750	0	-0.391067
751	0	0.120193
752	0	0.101595
753	1	-1.86928
754	0	0.481661
755	0	-0.608916
756	0	0.445886
757	1	-0.820952
758	0	-0.00461859
759	0	0.243689
760	0	-0.115103
761	0	0.221711
762	0	-0.0818705
763	0	0.293094
764	0	-0.476294
765	0	0.386236
766	0	0.575211
767	1	-0.828429
768	0	1.22983
769	1	-3.08584
770	0	-0.708033
771	0	1.46933
772	0	-0.375651
773	0	0.210421
774	0	0.92141
775	0	0.531471
776	0	0.220189
777	0	-0.437708
778	0	-0.277236
779	0	0.185791
780	0	-0.0449888
781	0	-0.630369
782	0	0.470276
783	0	0.0905678
784	1	-1.70975
785	0	-0.215474
786	0	0.361493
787	0	0.253171
788	0	0.71316
789	0	0.260554
790	1	-1.24068
791	1	-1.46138
792	0	0.0756071
793	0	1.39194
794	1	-0.787648
795	0	-0.37921
796	0	1.00028
797	0	-0.779015
798	0	-0.296512
799	0	0.539478
800	1	-2.14022
801	0	0.403107
802	0	1.31684
803	1	-1.94738
804	0	-0.488879
805	1	-0.985014
806	0	0.949597
807	0	1.16862
808	0	0.458031
809	0	0.55269
810	1	-2.45129
811	0	-0.375185
812	0	-0.441078
813	0	-0.488919
814	0	-0.241216
815	0	0.0950462
816	0	-0.182154
817	0	-0.644543
818	0	0.2366
819	0	0.688702
820	1	-1.00916
821	0	0.199925
822	1	-1.61307
823	0	-0.409935
824	1	-1.08096
825	0	-0.363222
826	0	-0.334276
827	0	-0.248847
828	0	0.45223
829	0	-0.485583
830	0	0.360045
831	0	0.951526
832	0	1.15984
833	0	1.95983
834	0	0.396037
835	0	0.712478
836	0	0.34646
837	0	-0.154163
838	0	-0.65687
839	1	-1.37986
840	0	0.505368
841	1	-1.03892
842	0	0.0376144
843	1	-1.91191
844	0	0.188002
845	0	0.64074
846	0	-0.306137
847	1	-1.04598
848	0	0.449683
849	0	-0.466027
850	0	0.0530112
851	0	1.20264
852	0	-0.483382
853	0	0.852213
854	0	-0.674734
855	0	0.759748
856	0	0.272658
857	1	-1.55072
858	0	0.168332
859	0	0.261989
860	1	-0.912053
861	0	0.331994
862	0	0.426032
863	0	-0.0678624
864	0	1.03032
865	0	0.357009
866	0	1.01035
867	0	-0.331639
868	0	0.31437
869	1	-0.838567
870	0	0.48239
871	0	1.67162
872	0	0.765021
873	0	-0.766648
874	0	1.16315
875	0	0.835735
876	0	1.92829
877	0	-0.694026
878	0	0.944977
879	0	2.04972
880	0	0.334207
881	0	-0.487065
882	0	0.795819
883	0	-0.738497
884	0	1.10974
885	0	-0.467924
886	0	-0.343694
887	1	-1.08829
888	0	-0.130595
889	0	0.45148
890	0	0.158388
891	0	1.18223
892	1	-0.833859
893	0	0.630096
894	1	-1.76945
895	0	-0.299762
896	0	-0.36237
897	0	-0.267055
898	0	-0.436198
899	0	0.963498
900	0	1.03102
901	0	0.474182
902	0	1.68479
903	0	-0.356791
904	0	0.164637
905	0	-0.0967954
906	0	0.658988
907	0	0.868
908	0	0.874471
909	0	0.91486
910	1	-1.11003
911	0	1.16042
912	0	-0.144489
913	0	-0.317229
914	0	-0.550973
915	0	-0.007347
916	0	0.353726
917	0	-0.0984409
918	1	-0.809876
919	1	-1.97511
920	0	-0.0592171
921	0	0.282764
922	0	-0.771665
923	0	0.58565
924	0	-0.627031
925	1	-1.00734
926	0	1.15881
927	1	-0.834073
928	0	-0.202078
929	0	0.315684
930	0	-0.733653
931	0	-0.615704
932	0	-0.46849
933	0	0.163532
934	0	0.0290196
935	0	0.126542
936	0	-0.74473
937	0	-0.146348
938	0	0.233285
939	0	-0.64256
940	0	0.885844
941	0	0.275423
942	0	0.238515
943	0	-0.0217398
944	0	0.115759
945	1	-1.12584
946	1	-1.29876
947	0	0.282811
948	0	-0.0602591
949	1	-0.870589
950	0	-0.628304
951	0	1.61238
952	0	0.458835
953	0	-0.216344
954	0	0.121195
955	0	1.03401
956	0	0.570447
957	1	-0.857035
958	0	-0.110039
959	0	-0.188833
960	1	-0.948559
961	0	-0.254467
962	0	-0.28158
963	0	0.830524
964	0	-0.160704
965	0	0.0145988
966	1	-1.37911
967	0	-0.419414
968	1	-0.913788
969	0	-0.577959
970	0	-0.551682
971	0	-0.585528
972	0	0.860814
973	1	-1.49067
974	0	0.14603
975	0	0.565038
976	0	0.111994
977	0	0.845496
978	0	-0.294367
979	0	0.291344
980	0	0.386687
981	0	0.257727
982	0	-0.731249
983	0	-0.00115401
984	0	0.646024
985	0	-0.692077
986	0	1.54399
987	0	-0.177938
988	1	-1.13697
989	0	-0.0310541
990	0	0.285008
991	1	-1.6977
992	0	2.31212
993	0	1.3772
994	0	-0.0598232
995	0	0.928438
996	0	0.000451939
997	0	-0.576738
998	0	0.959313
999	0	-0.514192
1000	0	-0.707227
1001	0	0.545641
1002	0	-0.774525
1003	0	-0.339756
1004	0	0.100636
1005	1	-1.50412
1006	0	0.272101
1007	0	-0.47884
1008	0	2.37426
1009	0	-0.55266
1010	0	0.983574
1011	0	-0.0555793
1012	1	-1.93286
1013	0	1.23054
1014	0	1.32242
1015	0	0.259775
1016	1	-1.83326
1017	0	-0.353874
1018	0	-0.462872
1019	0	0.970439
1020	0	-0.414033
1021	0	-0.226184
1022	0	0.301766
1023	1	-1.00485
1024	0	0.702637
1025	0	1.08279
1026	0	-0.0621594
1027	1	-1.6571
1028	0	-0.46277
1029	0	0.35309
1030	0	0.669925
1031	0	-0.326872
1032	0	-0.145448
1033	0	1.58217
1034	0	-0.228512
1035	0	-0.0388245
1036	0	-0.735081
1037	0	0.672375
1038	0	0.53529
1039	1	-0.878066
1040	0	0.607497
1041	0	0.143045
1042	0	0.277966
1043	0	0.435711
1044	0	-0.395324
1045	0	0.192645
1046	0	0.729945
1047	0	0.0234421
1048	0	0.412622
1049	1	-0.869289
1050	0	0.111635
1051	0	2.37895
1052	0	-0.268499
1053	0	0.115166
1054	0	0.200326
1055	0	-0.106933
1056	0	0.170785
1057	0	0.0102223
1058	0	-0.318608
1059	0	0.0570956
1060	0	-0.333761
1061	0	-0.446474
1062	0	-0.141922
1063	1	-0.837126
1064	0	1.47519
1065	1	-1.2812
1066	0	-0.389955
1067	0	0.408537
1068	0	0.780539
1069	1	-1.32513
1070	1	-1.18938
1071	0	0.596512
1072	0	0.607189
1073	0	0.565566
1074	0	-0.474795
1075	0	-0.640358
1076	0	-0.3192
1077	0	0.111465
1078	0	0.250173
1079	0	0.0943673
1080	0	-0.281327
1081	0	0.533077
1082	0	-0.686012
1083	0	0.686603
1084	1	-1.42487
1085	0	0.685255
1086	0	0.431079
1087	0	0.0470682
1088	0	0.00296859
1089	0	-0.293495
1090	0	0.422034
1091	0	-0.0399158
1092	0	-0.505647
1093	1	-0.952321
1094	0	0.665033
1095	0	-0.730482
1096	1	-2.45071
1097	0	-0.609624
1098	0	-0.509221
1099	0	-0.0205593
1100	0	-0.0902478
1101	0	-0.474492
1102	0	-0.34725
1103	1	-1.59681
1104	1	-1.19546
1105	1	-1.69379
1106	0	-0.449205
1107	0	-0.48434
1108	1	-1.10883
1109	0	-0.0843878
1110	0	0.558269
1111	0	-0.66647
1112	0	0.951539
1113	0	-0.544174
1114	0	0.0269151
1115	0	0.183894
1116	0	-0.715919
1117	0	0.254574
1118	0	-0.693599
1119	0	0.982171
1120	0	0.00320137
1121	0	-0.139378
1122	0	0.185161
1123	0	-0.0869242
1124	0	0.955345
1125	0	-0.549472
1126	0	-0.452114
1127	0	0.177885
1128	0	-0.603196
1129	0	-0.27462
1130	0	-0.16138
1131	0	-0.746852
1132	0	-0.424572
1133	0	-0.566549
1134	0	0.453175
1135	1	-0.892047
1136	1	-1.34518
1137	0	0.600385
1138	1	-1.73727
1139	0	0.211921
1140	0	0.362242
1141	0	2.34124
1142	0	1.2667
1143	0	-0.073603
1144	0	-0.388096
1145	0	0.92512
1146	0	0.336417
1147	0	-0.205086
1148	0	0.933499
1149	0	0.126498
1150	0	-0.115973
1151	0	-0.14939
1152	0	2.04254
1153	0	-0.394821
1154	0	-0.0846071
1155	0	-0.575439
1156	0	-0.445161
1157	1	-0.805409
1158	1	-1.34137
1159	0	-0.519328
1160	0	0.266101
1161	0	0.916453
1162	0	-0.545011
1163	0	0.25073
1164	1	-0.837292
1165	0	0.782688
1166	1	-1.39228
1167	1	-1.46039
1168	0	-0.688798
1169	1	-1.46545
1170	0	-0.0763858
1171	0	0.891519
1172	1	-1.97312
1173	0	1.35152
1174	0	-0.761754
1175	0	0.623795
1176	1	-1.08188
1177	1	-1.08961
1178	0	0.391003
1179	0	0.563432
1180	0	-0.418268
1181	0	1.64679
1182	0	-0.107763
1183	1	-0.839283
1184	0	-0.15197
1185	0	1.74989
1186	0	0.464566
1187	0	-0.191694
1188	0	0.93291
1189	0	0.0978402
1190	0	1.13527
1191	0	1.4499
1192	0	1.25617
1193	0	0.762044
1194	0	-0.231106
1195	0	0.477037
1196	0	-0.577942
1197	0	-0.0394399
1198	1	-1.50814
1199	0	-0.339683
1200	0	-0.333689
1201	0	0.188059
1202	1	-1.87874
1203	0	0.769652
1204	0	0.767521
1205	0	-0.331099
1206	0	0.885952
1207	0	0.432129
1208	0	-0.358286
1209	0	-0.644122
1210	0	0.0669086
1211	0	-0.208503
1212	0	-0.169698
1213	0	0.382485
1214	0	-0.00184902
1215	0	-0.292521
1216	1	-1.88421
1217	0	-0.403491
1218	0	-0.622927
1219	0	-0.381802
1220	0	-0.260441
1221	0	-0.441277
1222	0	0.90556
1223	0	0.458601
1224	0	-0.0228692
1225	0	1.12592
1226	0	0.653174
1227	0	0.132684
1228	1	-1.25379
1229	0	0.41312
1230	0	0.145675
1231	0	-0.690621
1232	0	0.553028
1233	0	1.15749
1234	0	0.299046
1235	0	0.197871
1236	0	-0.574737
1237	0	0.0658038
1238	0	-0.700458
1239	0	-0.284663
1240	1	-0.848172
1241	0	0.356298
1242	1	-0.912992
1243	0	1.15159
1244	0	0.243827
1245	0	-0.505677
1246	0	-0.231734
1247	0	-0.613631
1248	0	0.767977
1249	0	0.0271132
1250	0	0.959594
1251	0	-0.185586
1252	0	-0.504398
1253	0	-0.121081
1254	0	-0.632233
1255	0	0.365595
1256	0	-0.232807
1257	0	-0.189629
1258	0	0.799247
1259	0	0.271483
1260	0	0.187846
1261	0	-0.365739
1262	0	0.519008
1263	0	1.09958
1264	0	0.129654
1265	0	-0.555056
1266	0	-0.708265
1267	0	-0.331054
1268	1	-1.15721
1269	0	-0.76719
1270	0	0.855742
1271	0	0.812144
1272	1	-2.5751
1273	0	-0.0972225
1274	0	-0.0590921
1275	0	0.113095
1276	0	-0.152984
1277	0	-0.231903
1278	0	0.719809
1279	0	0.0314577
1280	1	-1.27314
1281	1	-1.47056
1282	0	-0.0157792
1283	0	1.4116
1284	0	0.488767
1285	0	0.0888295
1286	0	-0.432304
1287	1	-1.41294
1288	1	-1.48013
1289	0	0.363944
1290	0	0.0220982
1291	1	-1.94705
1292	0	0.970019
1293	0	0.734171
1294	0	0.604282
1295	0	0.529216
1296	0	-0.445149
1297	0	-0.637794
1298	0	2.40538
1299	0	1.6755
1300	0	-0.441657
1301	0	0.345958
1302	0	-0.0578229
1303	0	-0.212551
1304	0	-0.723703
1305	0	0.415096
1306	1	-1.18474
1307	0	-0.345767
1308	0	1.24233
1309	0	-0.388221
1310	0	-0.269018
1311	0	-0.30788
1312	0	0.564503
1313	1	-2.64378
1314	0	0.217065
1315	0	0.282214
1316	0	0.955332
1317	0	-0.596053
1318	0	0.314444
1319	1	-2.83769
1320	0	-0.585939
1321	0	0.615429
1322	0	-0.0635322
1323	0	1.46932
1324	0	0.6783
1325	0	0.338165
1326	0	0.374479
1327	0	0.548937
1328	0	0.0694911
1329	0	0.172554
1330	0	-0.286047
1331	0	0.588996
1332	1	-1.18004
1333	0	-0.396295
1334	0	-0.725168
1335	0	-0.619097
1336	0	0.156946
1337	0	0.409457
1338	0	0.149149
1339	0	-0.00812169
1340	0	-0.00703357
1341	0	0.288118
1342	0	-0.192597
1343	0	-0.328796
1344	0	0.664769
1345	0	0.250713
1346	0	0.304483
1347	0	0.489322
1348	0	-0.279668
1349	0	0.299143
1350	0	-0.0841116
1351	0	0.77972
1352	1	-0.946642
1353	0	-0.284707
1354	1	-0.986312
1355	0	1.20788
1356	0	0.207425
1357	0	0.209684
1358	1	-1.55564
1359	0	-0.248764
1360	1	-1.00207
1361	0	0.442631
1362	0	0.932253
1363	0	0.0289102
1364	0	-0.447193
1365	0	-0.333136
1366	0	0.178757
1367	1	-1.12491
1368	0	-0.18744
1369	0	-0.142872
1370	0	1.47057
1371	0	0.631509
1372	0	-0.634145
1373	0	0.0544215
1374	0	0.25102
1375	0	0.691577
1376	0	0.188311
1377	0	0.0244424
1378	1	-2.20403
1379	0	0.471948
1380	0	0.449579
1381	0	0.292267
1382	1	-0.931636
1383	0	-0.0848131
1384	0	0.441779
1385	0	0.22218
1386	0	0.137843
1387	0	-0.196132
1388	0	0.310383
1389	0	0.900298
1390	0	0.103361
1391	0	-0.485466
1392	0	-0.109086
1393	0	0.179257
1394	0	0.107345
1395	0	0.29527
1396	0	-0.783046
1397	0	0.33031
1398	0	0.0234482
1399	0	-0.275674
1400	0	0.269478
1401	0	0.325693
1402	0	-0.081911
1403	0	0.514455
1404	1	-0.967199
1405	0	-0.474999
1406	0	0.0777072
1407	0	0.073686
1408	0	-0.770364
1409	1	-2.20246
1410	0	1.26711
1411	0	-0.645957
1412	0	0.611385
1413	0	0.76429
1414	1	-0.896324
1415	0	-0.512326
1416	1	-0.854311
1417	1	-1.03947
1418	0	0.531799
1419	0	-0.511646
1420	0	0.0498581
1421	0	-0.599623
1422	0	0.0804754
1423	0	-0.297074
1424	0	0.417826
1425	0	0.659952
1426	0	-0.160569
1427	0	0.711946
1428	0	-0.155972
1429	0	1.13113
1430	0	0.511089
1431	0	-0.328268
1432	0	-0.0779292
1433	0	1.12468
1434	0	0.705
1435	0	0.594211
1436	1	-1.66443
1437	1	-2.27488
1438	0	0.512452
1439	0	1.42293
1440	0	-0.354711
1441	0	0.168676
1442	0	0.441445
1443	0	0.943041
1444	1	-0.891745
1445	0	0.203572
1446	0	-0.0359857
1447	0	-0.249416
1448	0	-0.419445
1449	0	0.985687
1450	0	-0.277777
1451	0	1.04067
1452	0	0.187773
1453	0	0.470964
1454	0	1.07417
1455	0	0.0438214
1456	0	-0.489862
1457	1	-1.60522
1458	0	-0.125624
1459	1	-2.01732
1460	0	0.609531
1461	0	0.316655
1462	0	0.203937
1463	0	-0.466563
1464	1	-1.66486
1465	0	-0.591723
1466	0	-0.639019
1467	0	0.0135816
1468	1	-1.38119
1469	0	-0.71647
1470	0	-0.385544
1471	0	0.435242
1472	0	0.877736
1473	0	-0.430255
1474	1	-1.42296
1475	0	-0.782935
1476	1	-0.883301
1477	0	1.4713
1478	0	0.456219
1479	1	-1.44652
1480	0	0.391997
1481	0	0.127641
1482	0	-0.210908
1483	0	1.66576
1484	0	-0.437693
1485	0	-0.744279
1486	0	-0.467144
1487	0	0.451773
1488	1	-1.52278
1489	1	-1.07451
1490	0	0.755803
1491	0	0.621801
1492	0	-0.215562
1493	0	0.0863699
1494	0	0.15251
1495	0	-0.154033
1496	0	-0.0425903
1497	0	1.11615
1498	0	1.12919
1499	1	-2.01412
1500	0	0.50762
1501	0	0.637478
1502	0	0.32666
1503	0	1.64686
1504	0	-0.349291
1505	0	-0.185674
1506	0	0.704395
1507	0	0.595544
1508	0	0.0163014
1509	0	0.177279
1510	0	-0.0434964
1511	0	-0.367602
1512	0	0.38775
1513	0	-0.0441203
1514	0	0.521998
1515	0	0.24227
1516	0	-0.721847
1517	1	-1.0231
1518	0	-0.0553806
1519	0	0.553026
1520	0	0.576658
1521	0	1.66091
1522	0	-0.777543
1523	0	0.882747
1524	0	0.71562
1525	0	-0.78535
1526	0	-0.00724108
1527	0	0.225977
1528	1	-0.863381
1529	0	1.06105
1530	0	0.276959
1531	0	-0.151528
1532	0	0.888137
1533	0	0.487069
1534	0	0.288763
1535	1	-1.65397
1536	0	0.0613817
1537	0	0.318757
1538	0	0.117854
1539	0	0.13693
1540	0	0.279757
1541	0	-0.506415
1542	0	0.134609
1543	0	-0.785584
1544	0	0.524591
1545	0	0.286404
1546	0	0.120231
1547	1	-0.954311
1548	0	-0.072605
1549	0	1.12635
1550	0	0.819275
1551	0	-0.145199
1552	0	-0.394853
1553	1	-1.59185
1554	0	0.172628
1555	0	0.730842
1556	0	0.660822
1557	0	-0.534934
1558	0	-0.359428
1559	0	0.168941
1560	0	0.514422
1561	0	-0.614766
1562	0	0.191303
1563	0	-0.372995
1564	0	-0.196352
1565	0	0.697153
1566	0	-0.517289
1567	0	0.196428
1568	0	0.129403
1569	0	0.022102
1570	1	-1.36447
1571	0	-0.620092
1572	0	-0.243083
1573	0	-0.426404
1574	0	-0.111433
1575	0	0.718248
1576	0	-0.731389
1577	0	-0.0756781
1578	0	-0.0800523
1579	0	-0.119206
1580	0	0.577946
1581	1	-0.855732
1582	0	0.0766149
1583	0	-0.679997
1584	0	-0.479256
1585	0	0.871179
1586	0	1.96423
1587	0	-0.0669655
1588	0	0.488862
1589	0	0.322252
1590	1	-0.992079
1591	0	0.0564819
1592	0	1.27278
1593	0	0.533656
1594	0	0.241524
1595	0	1.8174
1596	0	-0.101805
1597	1	-1.00305
1598	0	0.351017
1599	0	0.0517587
1600	0	0.74309
1601	0	0.1123
1602	0	-0.658182
1603	0	-0.0521325
1604	0	0.782714
1605	0	0.171363
1606	1	-0.827454
1607	0	-0.396819
1608	0	-0.130759
1609	0	0.140636
1610	0	-0.318889
1611	0	4.70341
1612	0	0.350105
1613	0	0.0533635
1614	1	-1.47864
1615	1	-1.99793
1616	0	-0.308576
1617	0	0.621098
1618	1	-0.856239
1619	1	-1.07164
1620	0	0.129396
1621	0	-0.565788
1622	1	-0.953468
1623	1	-0.861693
1624	0	0.426239
1625	0	-0.0417304
1626	1	-0.823305
1627	0	-0.0457808
1628	0	1.70426
1629	0	-0.102465
1630	0	0.613329
1631	0	-0.310793
1632	1	-1.57048
1633	0	0.299339
1634	0	-0.674837
1635	0	-0.372302
1636	0	0.216142
1637	0	0.14537
1638	0	0.417564
1639	0	0.464794
1640	0	0.148316
1641	0	-0.248806
1642	0	1.18782
1643	0	1.80317
1644	0	0.0893882
1645	0	0.148528
1646	0	-0.152981
1647	0	-0.385707
1648	0	1.37159
1649	0	0.114925
1650	0	0.885646
1651	1	-1.47295
1652	0	0.367428
1653	0	0.602317
1654	0	0.191223
1655	1	-0.86188
1656	0	-0.744037
1657	0	-0.179783
1658	0	-0.695597
1659	0	0.263346
1660	1	-0.905085
1661	0	0.424695
1662	1	-1.03137
1663	1	-1.52893
1664	0	-0.285231
1665	1	-1.59261
1666	0	1.43583
1667	0	0.562504
1668	0	0.0703878
1669	0	0.386622
1670	1	-1.56042
1671	0	0.23177
1672	0	0.255106
1673	0	-0.531058
1674	1	-0.848267
1675	0	-0.54654
1676	0	-0.565088
1677	0	-0.55429
1678	0	-0.630997
1679	0	0.836197
1680	1	-1.57354
1681	0	0.652923
1682	0	-0.28113
1683	0	0.418547
1684	0	0.034248
1685	0	-0.489295
1686	0	0.151233
1687	0	0.0698164
1688	0	0.0566405
1689	0	-0.216827
1690	1	-2.05692
1691	0	1.21029
1692	0	-0.0736885
1693	0	0.145061
1694	0	0.228729
1695	0	0.0390859
1696	0	0.40496
1697	0	0.732849
1698	0	0.607389
1699	0	-0.664329
1700	0	0.27596
1701	0	-0.707173
1702	1	-0.805652
1703	0	-0.00865218
1704	0	1.6279
1705	1	-0.855492
1706	0	-0.400084
1707	0	-0.130074
1708	1	-1.37239
1709	0	0.161271
1710	1	-0.886693
1711	0	0.0867152
1712	0	0.479436
1713	0	0.649399
1714	0	2.26768
1715	0	0.937155
1716	0	0.272163
1717	0	-0.480053
1718	0	-0.498126
1719	0	-0.139159
1720	0	0.538557
1721	0	0.548833
1722	0	0.278184
1723	0	0.796009
1724	1	-0.910426
1725	0	2.04799
1726	0	-0.0650253
1727	0	0.745621
1728	0	0.638641
1729	0	0.990193
1730	0	-0.146267
1731	1	-1.25639
1732	0	-0.129447
1733	0	-0.0502503
1734	0	0.607366
1735	1	-1.07223
1736	0	0.856704
1737	0	0.769207
1738	0	0.260925
1739	0	0.114308
1740	0	-0.244887
1741	0	0.235095
1742	0	1.95794
1743	1	-1.42777
1744	0	0.982522
1745	0	0.323787
1746	0	-0.747831
1747	0	-0.527746
1748	0	0.0866323
1749	1	-0.886393
1750	0	-0.453797
1751	0	0.681108
1752	0	0.285447
1753	0	-0.544516
1754	0	-0.381719
1755	0	0.278288
1756	0	0.596422
1757	0	0.834043
1758	1	-1.37609
1759	0	0.282961
1760	0	0.408712
1761	0	-0.198287
1762	0	0.420431
1763	0	0.199791
1764	0	-0.669429
1765	0	0.375501
1766	0	2.05874
1767	0	-0.529579
1768	1	-1.04623
1769	0	1.08269
1770	0	0.812847
1771	1	-0.801343
1772	0	0.995361
1773	0	0.786823
1774	0	-0.563292
1775	0	-0.515799
1776	0	-0.327756
1777	0	-0.266006
1778	0	0.562033
1779	1	-1.16939
1780	0	0.691132
1781	0	1.02689
1782	0	-0.270954
1783	0	-0.0864619
1784	0	0.251179
1785	0	0.437125
1786	0	1.0496
1787	0	-0.727874
1788	0	-0.0767996
1789	0	0.590377
1790	0	0.320259
1791	0	0.326787
1792	0	-0.198295
1793	0	-0.210177
1794	0	0.129063
1795	0	0.353767
1796	0	0.250799
1797	0	-0.576169
1798	0	-0.396045
1799	0	-0.473444
1800	0	0.0306213
1801	0	-0.260486
1802	1	-1.83464
1803	0	0.375507
1804	0	0.232953
1805	0	-0.486774
1806	0	0.270577
1807	0	-0.507364
1808	1	-1.58842
1809	0	0.0237239
1810	0	0.000932498
1811	0	0.713317
1812	0	-0.475581
1813	0	0.413836
1814	0	1.15342
1815	0	-0.404689
1816	0	0.200075
1817	0	0.395339
1818	0	0.282899
1819	0	1.48587
1820	0	-0.628855
1821	0	-0.0952654
1822	0	0.398711
1823	0	0.0379975
1824	0	-0.26701
1825	0	-0.302758
1826	0	0.0636672
1827	0	0.179606
1828	0	1.07191
1829	1	-1.18765
1830	0	-0.567763
1831	0	-0.638541
1832	0	-0.530809
1833	0	-0.382149
1834	0	-0.2752
1835	0	-0.326869
1836	0	1.31942
1837	0	0.302582
1838	0	0.259283
1839	0	-0.163026
1840	0	0.418073
1841	0	-0.0729709
1842	1	-1.17009
1843	0	0.250023
1844	0	0.425959
1845	0	0.671782
1846	0	-0.493424
1847	0	-0.171423
1848	0	0.441801
1849	0	0.565422
1850	0	1.19777
1851	0	-0.343443
1852	1	-1.18847
1853	0	-0.116413
1854	0	0.148941
1855	0	-0.212807
1856	0	-0.141463
1857	0	-0.145592
1858	0	0.207347
1859	1	-3.934
1860	0	0.507811
1861	0	-0.312127
1862	1	-0.818446
1863	0	-0.361746
1864	0	-0.0203595
1865	0	-0.354268
1866	0	0.40129
1867	0	0.146856
1868	0	0.0648534
1869	0	1.94753
1870	0	0.945639
1871	1	-0.834542
1872	0	-0.0666201
1873	0	1.7706
1874	1	-1.18802
1875	0	0.526052
1876	0	-0.375065
1877	1	-0.809274
1878	0	-0.624126
1879	0	-0.267152
1880	0	-0.530333
1881	0	0.462523
1882	1	-0.908687
1883	0	1.60039
1884	0	-0.513523
1885	0	0.98336
1886	1	-1.00513
1887	0	-0.215882
1888	0	-0.557568
1889	0	-0.48036
1890	0	1.17183
1891	1	-1.12239
1892	0	0.374423
1893	0	-0.0493194
1894	1	-1.36861
1895	1	-1.06872
1896	0	0.493102
1897	0	0.0390248
1898	0	-0.273513
1899	0	-0.462764
1900	0	-0.350396
1901	0	-0.588323
1902	0	0.587087
1903	0	-0.611424
1904	0	-0.273905
1905	0	-0.072939
1906	0	0.0872588
1907	0	0.949375
1908	0	-0.608091
1909	0	1.1254
1910	0	0.59836
1911	1	-1.4639
1912	0	0.956888
1913	0	1.17169
1914	1	-1.15649
1915	0	-0.0879048
1916	0	1.85752
1917	0	-0.32754
1918	0	0.36615
1919	0	-0.645985
1920	0	0.29396
1921	0	0.201588
1922	1	-0.926822
1923	0	-0.131298
1924	0	0.92726
1925	0	1.05446
1926	0	0.749406
1927	0	0.870959
1928	0	0.118721
1929	1	-1.91726
1930	0	-0.526791
1931	0	-0.506932
1932	0	0.753972
1933	0	0.532572
1934	0	-0.179122
1935	0	-0.195676
1936	0	-0.589775
1937	0	0.826405
1938	0	0.0552542
1939	0	-0.295303
1940	0	-0.1501
1941	0	-0.601112
1942	0	0.603587
1943	0	0.214222
1944	0	-0.172417
1945	0	-0.210756
1946	0	-0.20087
1947	0	0.506636
1948	0	-0.385263
1949	0	1.19753
1950	1	-2.13003
1951	0	0.113569
1952	0	-0.455102
1953	0	0.0520282
1954	0	-0.239918
1955	0	0.290264
1956	0	-0.451736
1957	0	0.771265
1958	0	0.793841
1959	1	-1.1175
1960	0	-0.0268121
1961	0	-0.0671553
1962	0	-0.438257
1963	0	-0.382979
1964	0	0.130382
1965	0	-0.0232715
1966	0	0.253722
1967	0	0.0220528
1968	1	-1.38576
1969	0	0.306357
1970	0	0.490477
1971	0	0.751501
1972	0	0.310055
1973	0	0.488702
1974	0	1.37911
1975	0	-0.32684
1976	0	0.514499
1977	0	0.662748
1978	0	0.0526349
1979	1	-0.817305
1980	0	-0.0892391
1981	0	-0.268383
1982	0	-0.247621
1983	0	-0.215453
1984	1	-0.905912
1985	0	0.313454
1986	0	0.0797597
1987	0	0.867258
1988	0	0.576777
1989	0	0.484613
1990	0	1.10414
1991	0	-0.118063
1992	0	-0.495913
1993	0	1.1218
1994	0	1.64411
1995	0	-0.462824
1996	0	0.665916
1997	0	-0.767712
1998	0	0.629572
1999	0	0.343664
[truncated: 1,001 more rows]
