# Supplementary material for: Time-varying asymmetry and tail thickness in long series of daily financial returns
Source: publisher site journal article supplement (doi:10.1515/snde-2017-0071), 2018-10-02
Supplement: Supplementary file 417 [file r_1.xlsx]

## Sheet: 1
	Var1	Var2	Var3	Var4	Var5	Var6	Var7	Var8	Var9	Var10	Var11	Var12	Var13	Var14	Var15	Var16	Var17	Var18	Var19	Var20	Var21	Var22	Var23	Var24	Var25
1	0	0.000980065	0.000706223	0.000851952	0.0010865	0.00114341	0.000914727	0.000832335	0.00105545	0.000672594	0.000614943	0.000857557	0.000922414	0.000807112	0.000735896	0.000882779	0.000568647	0.00086092	0.000550304	0.000695013	0.000508832	0.000783374	0.000834016	0.00050041	0.000780209
2	0	3.127	3.1355	3.145	3.15275	3.159	3.16575	3.1735	3.18075	3.18925	3.19975	3.209	3.2165	3.224	3.23225	3.2405	3.25	3.25925	3.2685	3.2785	3.28875	3.29875	3.30675	3.31675	3.32675
3	0	34	35	38	35	34	34	33	34	35	32	34	32	32	31	35	31	32	30	31	29	33	31	31	29
4	3.1235	3.1305	3.1405	3.1495	3.156	3.162	3.1695	3.1775	3.184	3.1945	3.205	3.213	3.22	3.228	3.2365	3.2445	3.2555	3.263	3.274	3.283	3.2945	3.303	3.3105	3.323	3.3305
