# Supplementary material for: Time-varying asymmetry and tail thickness in long series of daily financial returns
Source: publisher site journal article supplement (doi:10.1515/snde-2017-0071), 2018-10-02
Supplement: Supplementary file 419 [file r_2.xlsx]

## Sheet: 1
	Var1	Var2	Var3	Var4	Var5	Var6	Var7	Var8	Var9	Var10	Var11	Var12	Var13	Var14	Var15	Var16	Var17	Var18
1	0	2.49332e-05	2.67086e-05	2.64581e-05	1.59345e-05	2.87087e-05	2.11868e-05	1.03566e-05	5.49415e-06	6.4391e-06	1.1371e-05	3.43525e-06	3.59892e-06	2.58733e-06	1.85793e-06	1.8112e-06	1.47945e-06	5.33863e-07
2	0	5.23296	5.3112	5.38329	5.4746	5.55969	5.6259	5.73219	5.92892	6.15147	6.29871	6.49879	6.7858	7.12093	7.58741	8.13743	8.75692	9.8538
3	0	10	10	9	9	8	8	7	7	6	6	5	5	5	5	5	5	4
4	5.1925	5.27343	5.34898	5.41761	5.53158	5.58781	5.664	5.80038	6.05746	6.24548	6.35195	6.64564	6.92597	7.3159	7.85892	8.41595	9.09788	10.6097
