# Supplementary material for: Time-varying asymmetry and tail thickness in long series of daily financial returns
Source: publisher site journal article supplement (doi:10.1515/snde-2017-0071), 2018-10-02
Supplement: Supplementary file 421 [file theta_max.xlsx]

## Sheet: 1
	Var1
1	0.325104
2	1.08263
3	0.0171016
4	-5.28703
5	-2.21436
6	2.66882
7	-3.96377
8	-0.609219
9	0.0210483
10	1.24708
11	1.71841
12	0.00369483
