# Supplementary material for: Time-varying asymmetry and tail thickness in long series of daily financial returns
Source: publisher site journal article supplement (doi:10.1515/snde-2017-0071), 2018-10-02
Supplement: Supplementary file 423 [file theta_max_.xlsx]

## Sheet: 1
	Var1
1	0.324758
2	0.7483
3	0.0157056
4	-5.26816
5	-2.2137
6	2.66221
7	-3.9306
8	-0.728574
9	0.0235787
10	1.24317
11	1.7119
12	0.00237182
