# Supplementary material for: Time-varying asymmetry and tail thickness in long series of daily financial returns
Source: publisher site journal article supplement (doi:10.1515/snde-2017-0071), 2018-10-02
Supplement: Supplementary file 425 [file cvm_c0.xlsx]

## Sheet: 1
	Var1	Var2	Var3	Var4	Var5	Var6	Var7	Var8	Var9	Var10	Var11	Var12
1	0.0287534	0.107433	-0.00711475	-0.0186312	0.0296778	-0.0279361	-0.0137814	0.00337259	0.000950625	0.0115158	0.00524218	-0.00341594
2	0.107433	8.10461	0.0790016	0.231714	-0.131132	-0.540509	-0.569676	-0.43561	-0.0510265	0.555063	-0.0289679	-0.0231553
3	-0.00711475	0.0790016	0.107486	0.0425149	0.0672325	0.0453821	-0.0756905	-0.0970672	-0.0577384	0.0984716	0.0240554	-0.0139528
4	-0.0186312	0.231714	0.0425149	2.45834	0.401589	-0.0389587	0.293431	0.593039	0.0053243	0.408659	0.072069	-0.0143295
5	0.0296778	-0.131132	0.0672325	0.401589	2.00456	0.108681	0.031307	0.0863662	-0.0368939	-0.214191	-0.0613055	-0.0358526
6	-0.0279361	-0.540509	0.0453821	-0.0389587	0.108681	3.25726	-0.0918992	-0.088474	0.00560843	-0.598321	-0.117598	-0.0226466
7	-0.0137814	-0.569676	-0.0756905	0.293431	0.031307	-0.0918992	3.39456	0.530558	0.0296715	-1.077	-0.217069	-0.0879384
8	0.00337259	-0.43561	-0.0970672	0.593039	0.0863662	-0.088474	0.530558	2.28011	0.0561887	-0.199569	-0.104095	-0.00979812
9	0.000950625	-0.0510265	-0.0577384	0.0053243	-0.0368939	0.00560843	0.0296715	0.0561887	0.0420167	-0.0259055	-0.0178281	0.00362505
10	0.0115158	0.555063	0.0984716	0.408659	-0.214191	-0.598321	-1.077	-0.199569	-0.0259055	3.85293	0.212746	0.106791
11	0.00524218	-0.0289679	0.0240554	0.072069	-0.0613055	-0.117598	-0.217069	-0.104095	-0.0178281	0.212746	0.756006	-0.0212328
12	-0.00341594	-0.0231553	-0.0139528	-0.0143295	-0.0358526	-0.0226466	-0.0879384	-0.00979812	0.00362505	0.106791	-0.0212328	0.0561106
