# Supplementary material for: Time-varying asymmetry and tail thickness in long series of daily financial returns
Source: publisher site journal article supplement (doi:10.1515/snde-2017-0071), 2018-10-02
Supplement: Supplementary file 427 [file cvm_c1.xlsx]

## Sheet: 1
	Var1	Var2	Var3	Var4	Var5	Var6	Var7	Var8	Var9	Var10	Var11	Var12	Var13	Var14	Var15	Var16	Var17	Var18
1	1.46765	-0.157355	-0.252114	-0.100144	0.0352865	-0.0594808	0.119353	-0.19885	0.003045	0.094245	-0.534205	0.144229	-0.0997575	-0.0712082	0.189359	-0.318713	-0.353578	-0.14024
2	-0.157355	1.20454	-0.25438	-0.106714	-0.343491	0.129356	0.0196032	-0.131483	-0.219826	-0.140288	-0.276701	0.270165	-0.0367004	0.129736	0.12767	0.193049	-0.236473	0.125125
3	-0.252114	-0.25438	0.691586	0.129284	-0.0249735	-0.168878	-0.0966396	0.141541	-0.0660904	0.13533	0.00976312	0.264809	-0.094992	-0.140289	-0.141674	0.119473	0.197647	0.147491
4	-0.100144	-0.106714	0.129284	1.10978	-0.478394	0.15644	-0.0751258	-0.0701997	0.0626288	-0.276425	0.46032	-0.00431891	-0.380492	-0.108817	-0.0125915	0.377252	0.0853544	0.0841867
5	0.0352865	-0.343491	-0.0249735	-0.478394	1.2316	-0.472291	0.129817	0.167904	0.175691	0.0646735	-0.344985	-0.114242	0.0028684	0.254809	0.0749482	-0.266239	0.0124929	-0.188168
6	-0.0594808	0.129356	-0.168878	0.15644	-0.472291	0.941766	-0.269396	-0.269042	0.0394777	-0.100575	0.13768	0.089477	-0.347746	-0.295468	0.256592	0.309219	0.0551775	0.0393022
7	0.119353	0.0196032	-0.0966396	-0.0751258	0.129817	-0.269396	1.64901	0.146293	-0.0212624	-0.0239739	-0.249034	0.0358343	-0.00409657	0.0464274	-0.0581963	-0.42872	-0.378726	0.426941
8	-0.19885	-0.131483	0.141541	-0.0701997	0.167904	-0.269042	0.146293	1.64623	0.00730837	0.225879	-0.297569	-0.139998	0.343785	0.0732596	0.0107912	-0.322335	-0.152664	0.0465595
9	0.003045	-0.219826	-0.0660904	0.0626288	0.175691	0.0394777	-0.0212624	0.00730837	1.24762	0.295934	-0.1331	-0.079883	-0.152677	-0.162681	0.00256578	-0.117299	0.212559	0.11431
10	0.094245	-0.140288	0.13533	-0.276425	0.0646735	-0.100575	-0.0239739	0.225879	0.295934	3.5783	-1.77079	0.669775	0.0604633	0.0837486	-0.454385	-0.568504	-0.00445457	0.125236
11	-0.534205	-0.276701	0.00976312	0.46032	-0.344985	0.13768	-0.249034	-0.297569	-0.1331	-1.77079	4.80207	-1.59005	1.47547	-0.28447	-0.595385	-0.25692	0.410982	0.299334
12	0.144229	0.270165	0.264809	-0.00431891	-0.114242	0.089477	0.0358343	-0.139998	-0.079883	0.669775	-1.59005	2.04272	-0.896583	0.0357001	-0.517716	0.0189233	0.28597	-0.047554
13	-0.0997575	-0.0367004	-0.094992	-0.380492	0.0028684	-0.347746	-0.00409657	0.343785	-0.152677	0.0604633	1.47547	-0.896583	3.88538	0.438305	-1.22864	-1.39506	0.369041	-0.0377271
14	-0.0712082	0.129736	-0.140289	-0.108817	0.254809	-0.295468	0.0464274	0.0732596	-0.162681	0.0837486	-0.28447	0.0357001	0.438305	2.50322	-0.747024	-0.782879	-0.148014	-0.298384
15	0.189359	0.12767	-0.141674	-0.0125915	0.0749482	0.256592	-0.0581963	0.0107912	0.00256578	-0.454385	-0.595385	-0.517716	-1.22864	-0.747024	2.47638	0.502008	-0.977272	-0.173863
16	-0.318713	0.193049	0.119473	0.377252	-0.266239	0.309219	-0.42872	-0.322335	-0.117299	-0.568504	-0.25692	0.0189233	-1.39506	-0.782879	0.502008	5.43231	1.00653	-0.488345
17	-0.353578	-0.236473	0.197647	0.0853544	0.0124929	0.0551775	-0.378726	-0.152664	0.212559	-0.00445457	0.410982	0.28597	0.369041	-0.148014	-0.977272	1.00653	3.82739	-0.408236
18	-0.14024	0.125125	0.147491	0.0841867	-0.188168	0.0393022	0.426941	0.0465595	0.11431	0.125236	0.299334	-0.047554	-0.0377271	-0.298384	-0.173863	-0.488345	-0.408236	2.59788
