# Supplementary material for: Time-varying asymmetry and tail thickness in long series of daily financial returns
Source: publisher site journal article supplement (doi:10.1515/snde-2017-0071), 2018-10-02
Supplement: Supplementary file 429 [file cvm_c2.xlsx]

## Sheet: 1
	Var1	Var2	Var3
1	3.39432	1.91259	1.9167
2	1.91259	3.75081	1.89021
3	1.9167	1.89021	3.37547
