# Supplementary material for: Time-varying asymmetry and tail thickness in long series of daily financial returns
Source: publisher site journal article supplement (doi:10.1515/snde-2017-0071), 2018-10-02
Supplement: Supplementary file 431 [file cvm_c3.xlsx]

## Sheet: 1
	Var1	Var2	Var3
1	3.32058	1.38218	1.38025
2	1.38218	3.27222	1.44923
3	1.38025	1.44923	3.17114
