# Supplementary material for: Time-varying asymmetry and tail thickness in long series of daily financial returns
Source: publisher site journal article supplement (doi:10.1515/snde-2017-0071), 2018-10-02
Supplement: Supplementary file 433 [file cvm_s0.xlsx]

## Sheet: 1
	Var1	Var2	Var3	Var4	Var5	Var6	Var7	Var8	Var9	Var10	Var11	Var12
1	0.169568	0	0	0	0	0	0	0	0	0	0	0
2	0.633567	2.77546	0	0	0	0	0	0	0	0	0	0
3	-0.0419581	0.0380422	0.322922	0	0	0	0	0	0	0	0	0
4	-0.109874	0.108568	0.104591	1.55677	0	0	0	0	0	0	0	0
5	0.17502	-0.0871994	0.241214	0.260191	1.35663	0	0	0	0	0	0	0
6	-0.164749	-0.157137	0.137641	-0.0349416	0.0734937	1.78322	0	0	0	0	0	0
7	-0.0812736	-0.186702	-0.222958	0.21075	0.0207842	-0.0550141	1.8043	0	0	0	0	0
8	0.0198893	-0.161491	-0.278981	0.41235	0.0212348	-0.0332694	0.19434	1.4023	0	0	0	0
9	0.00560615	-0.0196646	-0.175755	0.0169951	-0.00119222	0.0158784	-0.00854266	-0.000659538	0.100465	0	0	0
10	0.0679125	0.184486	0.292029	0.234811	-0.251747	-0.320562	-0.572971	-0.0573692	0.244203	1.76536	0	0
11	0.0309149	-0.0174942	0.0805708	0.0442827	-0.0731213	-0.0669703	-0.11714	-0.0579248	-0.0497692	0.0463267	0.845435	0
12	-0.0201449	-0.0037443	-0.0453843	-0.00731619	-0.0145968	-0.0109297	-0.0549517	-0.00643302	-0.044845	0.0542321	-0.0355417	0.209687
