# Supplementary material for: Time-varying asymmetry and tail thickness in long series of daily financial returns
Source: publisher site journal article supplement (doi:10.1515/snde-2017-0071), 2018-10-02
Supplement: Supplementary file 435 [file cvm_s1.xlsx]

## Sheet: 1
	Var1	Var2	Var3	Var4	Var5	Var6	Var7	Var8	Var9	Var10	Var11	Var12	Var13	Var14	Var15	Var16	Var17	Var18
1	1.21147	0	0	0	0	0	0	0	0	0	0	0	0	0	0	0	0	0
2	-0.129888	1.0898	0	0	0	0	0	0	0	0	0	0	0	0	0	0	0	0
3	-0.208107	-0.258222	0.762627	0	0	0	0	0	0	0	0	0	0	0	0	0	0	0
4	-0.0826638	-0.107773	0.110476	1.03881	0	0	0	0	0	0	0	0	0	0	0	0	0	0
5	0.0291271	-0.311715	-0.130343	-0.47668	0.943063	0	0	0	0	0	0	0	0	0	0	0	0	0
6	-0.0490982	0.112845	-0.196631	0.179307	-0.398534	0.834851	0	0	0	0	0	0	0	0	0	0	0	0
7	0.0985196	0.0297299	-0.0897688	-0.0518481	0.105824	-0.280401	1.2401	0	0	0	0	0	0	0	0	0	0	0
8	-0.16414	-0.140212	0.0933308	-0.10511	0.0965367	-0.222323	0.0782233	1.23086	0	0	0	0	0	0	0	0	0	0
9	0.00251348	-0.201413	-0.154173	0.0559892	0.126638	0.0867756	-0.0125219	0.00633805	1.07535	0	0	0	0	0	0	0	0	0
10	0.0777941	-0.119456	0.158234	-0.289128	-0.0975811	-0.0469641	-0.0255748	0.144387	0.304515	1.82302	0	0	0	0	0	0	0	0
11	-0.440958	-0.306455	-0.211291	0.398709	-0.28116	-0.0892109	-0.153243	-0.269724	-0.19108	-0.857261	1.83179	0	0	0	0	0	0	0
12	0.119054	0.262092	0.468464	-0.0173133	0.0178105	0.20131	0.0903407	-0.0757846	0.0257475	0.345194	-0.564552	1.11661	0	0	0	0	0	0
13	-0.0823444	-0.0434904	-0.161755	-0.360138	-0.213182	-0.478016	-0.112378	0.182402	-0.0930773	-0.0334477	0.774208	-0.206712	1.65804	0	0	0	0	0
14	-0.0587785	0.11204	-0.162058	-0.0805704	0.245918	-0.275989	-0.0590673	0.00446744	-0.156603	0.0881071	-0.106939	0.0519037	0.228008	1.48859	0	0	0	0
15	0.156305	0.135779	-0.0971442	0.0247347	0.118601	0.326614	-0.004869	0.104559	-0.0287596	-0.223451	-0.339751	-0.626368	-0.561793	-0.38098	1.12804	0	0	0
16	-0.26308	0.145786	0.134233	0.343072	-0.0340384	0.276893	-0.238734	-0.193381	-0.0997527	-0.214368	-0.389301	-0.211664	-0.537007	-0.402171	-0.27479	2.06301	0	0
17	-0.291859	-0.251772	0.0942741	0.0227943	-0.0364063	0.0828888	-0.24655	-0.163338	0.15921	-0.0279841	0.0751787	0.344611	0.252333	-0.0952799	-0.488075	0.439408	1.70856	0
18	-0.115761	0.101017	0.196013	0.061464	-0.104404	0.00974078	0.378925	0.0101493	0.166255	0.0443944	0.217438	-0.0729209	-0.0798234	-0.108644	-0.164279	-0.257457	-0.187118	1.46585
