# Supplementary material for: Time-varying asymmetry and tail thickness in long series of daily financial returns
Source: publisher site journal article supplement (doi:10.1515/snde-2017-0071), 2018-10-02
Supplement: Supplementary file 437 [file cvm_s2.xlsx]

## Sheet: 1
	Var1	Var2	Var3
1	1.84237	0	0
2	1.03811	1.63497	0
3	1.04035	0.495552	1.43094
