# Supplementary material for: Time-varying asymmetry and tail thickness in long series of daily financial returns
Source: publisher site journal article supplement (doi:10.1515/snde-2017-0071), 2018-10-02
Supplement: Supplementary file 439 [file cvm_s3.xlsx]

## Sheet: 1
	Var1	Var2	Var3
1	1.82225	0	0
2	0.758505	1.64222	0
3	0.757446	0.532636	1.52109
