# Supplementary material for: Time-varying asymmetry and tail thickness in long series of daily financial returns
Source: publisher site journal article supplement (doi:10.1515/snde-2017-0071), 2018-10-02
Supplement: Supplementary file 441 [file data1.xlsx]

## Sheet: 1
	s&p500_
1	0
2	-23
3	0
4	0
5	0
6	0
7	0
8	0
9	0
10	0
11	1.134
12	0.473654
13	0.294898
14	0.587201
15	-0.293169
16	0.3517
17	-1.94984
18	-0.53844
19	0.299491
20	0.833834
21	-0.0593296
22	0.118624
23	0.177673
24	0.118273
25	-0.35524
26	-0.714289
27	-0.059755
28	0.536514
29	1.18205
30	0.176108
31	0
32	1.05018
33	0.347625
34	0.17336
35	-0.520985
36	-0.116144
37	0.405915
38	-0.23175
39	-1.04957
40	0
41	-0.411161
42	0.937324
43	0.291121
44	-0.174571
45	0.232694
46	0.405915
47	0
48	-0.347826
49	0.116077
50	-0.0580215
51	0.347625
52	0.17336
53	-0.695252
54	-0.0581564
55	-0.700528
56	0.117096
57	0.175387
58	0.756477
59	1.15275
60	0.228964
61	-0.228964
62	-0.057323
63	0.057323
64	0.57143
65	0.0569638
66	0
67	-0.571104
68	0.400115
69	-0.514728
70	-0.805992
71	-0.0578202
72	1.37854
73	0.114025
74	0.454805
75	0.847223
76	0.392928
77	-0.561799
78	1.06473
79	0.222717
80	-0.111297
81	-0.446429
82	0.835427
83	0.110865
84	-0.66704
85	0.167178
86	-0.726463
87	0
88	-0.393369
89	0.561484
90	0.558349
91	1.43728
92	-0.605562
93	0.87961
94	-0.824407
95	0.550359
96	0.274048
97	0
98	0.109409
99	0
100	-0.603237
101	0.439079
102	0.980934
103	0.432901
104	0.21575
105	0.644471
106	-0.429185
107	0.589656
108	-0.106952
109	0
110	-0.107066
111	0.267451
112	0.32
113	-0.0532623
114	0.106496
115	-1.01632
116	1.49416
117	0.26448
118	1.10324
119	0.625002
120	0.724266
121	-0.776201
122	-1.41253
123	-0.263783
124	0.211082
125	-0.263922
126	-0.476822
127	0.898764
128	0.838579
129	-0.104439
130	-5.53161
131	-1.11051
132	1.11051
133	-3.76979
134	1.42331
135	-0.283046
136	0.959105
137	0.559912
138	-1.34909
139	-0.453773
140	-1.54687
141	-2.6325
142	-1.07272
143	1.07272
144	-1.13265
145	2.25261
146	1.74322
147	1.42982
148	-0.113636
149	-0.627319
150	-1.44053
151	0.231884
152	1.323
153	1.07986
154	0.844362
155	1.00391
156	-0.389214
157	0.222593
158	0.83034
159	1.47746
160	0.271223
161	0.809284
162	-0.701
163	-1.08815
164	0.0546896
165	0.16389
166	0.109111
167	1.08461
168	0.752287
169	0.107009
170	-0.107009
171	0.74667
172	-0.159532
173	-1.33943
174	-0.053952
175	0.053952
176	-0.595079
177	-0.0542741
178	0.703276
179	0.698364
180	-0.752287
181	0.269324
182	0.856995
183	-0.749468
184	1.38743
185	1.15913
186	0.470343
187	0.571876
188	0.413865
189	-0.310238
190	-0.519212
191	0.82945
192	0.360732
193	-0.102934
194	-1.45231
195	1.4008
196	0.0515066
197	0.154361
198	1.22638
199	-0.152478
200	1.71462
201	-0.551518
202	1.14973
203	-0.598207
204	-1.10609
205	0.403633
206	-0.0503651
207	-0.707789
208	0.909097
209	0.601506
210	0.0499625
211	-0.30015
212	0
213	0.599402
214	-0.149514
215	-2.21895
216	0.8126
217	-0.8126
218	-0.40879
219	0.153492
220	0.865366
221	0.606369
222	-2.49949
223	1.02776
224	1.16901
225	0.7551
226	0.350438
227	-0.752449
228	-0.201613
229	-0.505818
230	0.707431
231	0.351848
232	-0.251193
233	1.39862
234	0.790518
235	-0.691361
236	-3.12054
237	-0.976119
238	0.720168
239	0.765896
240	-3.41471
241	1.61841
242	0.722397
243	-0.2574
244	0
245	1.63603
246	-0.203046
247	-0.0508259
248	-1.22764
249	-0.515997
250	2.65457
251	0.552626
252	0.0500877
253	0.0500626
254	0.449439
255	-0.750191
256	1.88966
257	0.393314
258	0.245038
259	1.65052
260	-0.385915
261	0.866223
262	0
263	0.620972
264	0.569802
265	-1.28665
266	1.61754
267	-0.378251
268	0.896021
269	0.748366
270	0.418508
271	-0.698489
272	-0.187091
273	-0.846267
274	0.377003
275	-0.471477
276	-0.616262
277	1.08774
278	1.91014
279	0.322507
280	-0.368664
281	0.506563
282	0.868974
283	1.08697
284	-0.361011
285	-0.589437
286	0.453721
287	0.361501
288	0.0450958
289	-0.270881
290	-0.543972
291	0.58917
292	-1.3649
293	-0.183402
294	0.320733
295	0.274098
296	0.04561
297	-0.778214
298	0.183655
299	0.229095
300	0.365464
301	-0.640441
302	0
303	0.320733
304	0.410866
305	0
306	-1.14549
307	-1.34542
308	-0.750121
309	0.188058
310	1.6306
311	-0.370371
312	-0.185701
313	0.556072
314	0.415034
315	-0.924648
316	-0.0929368
317	-1.16906
318	0.328716
319	0.700774
320	-0.747667
321	-0.281823
322	0.656355
323	1.34604
324	0.138217
325	-0.184332
326	-0.138472
327	-0.0462
328	0.874172
329	1.18398
330	-0.226603
331	0.226603
332	0.180914
333	-0.407517
334	0
335	0.0453618
336	-0.408999
337	0.045527
338	0.861098
339	1.03256
340	0.178492
341	0.444841
342	0.398672
343	0.836457
344	-0.175516
345	-0.616742
346	-0.0884173
347	0.132597
348	-0.57586
349	-0.802859
350	-0.674008
351	-1.91176
352	-0.32221
353	1.00918
354	-1.84252
355	-0.232721
356	-0.467072
357	-0.940741
358	-0.521205
359	-0.095057
360	0.852278
361	0.657897
362	0.7931
363	-0.186047
364	-1.12361
365	0.422834
366	0.700774
367	0.371748
368	-0.325204
369	0.556846
370	-0.417344
371	0.139308
372	1.33673
373	0.911583
374	0.0453618
375	-0.136147
376	-0.500798
377	-0.595104
378	-1.06163
379	-1.21383
380	0.0469594
381	0.3281
382	-1.2715
383	-0.665718
384	0.665718
385	0.614224
386	1.91282
387	0
388	0.415034
389	-0.461255
390	0.230894
391	0.551979
392	0.822298
393	-1.14392
394	0.870567
395	-0.182648
396	-0.182983
397	0.182983
398	1.00046
399	1.52675
400	-0.536194
401	0.669795
402	0.266667
403	0.442871
404	-1.02155
405	0.48987
406	1.36777
407	0.131377
408	0.697779
409	0.086881
410	-0.435162
411	-0.393271
412	-0.219154
413	0.0438693
414	-0.439561
415	0.395692
416	0.350416
417	0.30561
418	-0.0436015
419	-0.437064
420	-0.351032
421	0.657177
422	-0.0873744
423	-0.131205
424	0.218579
425	0.782953
426	0.690849
427	0.171969
428	0
429	0.599574
430	0.213265
431	0.255319
432	0.381761
433	-0.509339
434	0.424629
435	0.465019
436	-0.0843882
437	-0.295921
438	-0.127092
439	0
440	-0.0848176
441	-0.723869
442	-0.428266
443	0.34276
444	0.0855066
445	-0.557105
446	-0.042983
447	0.898786
448	0.721718
449	0.632513
450	-0.294675
451	0.252632
452	-0.126236
453	-0.421942
454	-0.169276
455	0.38047
456	0.630917
457	-0.335994
458	-0.337126
459	-0.0844595
460	-1.48971
461	-2.47462
462	0.394824
463	0.828433
464	-0.304414
465	-0.655454
466	-0.527474
467	-0.132304
468	1.22809
469	0.695051
470	-0.738652
471	-0.480875
472	-1.45666
473	-0.088968
474	1.23841
475	0.17567
476	0.262927
477	-0.0437733
478	-0.087604
479	-0.395171
480	-0.220216
481	-0.176523
482	-1.06573
483	0.133839
484	1.02019
485	-0.220897
486	0.265018
487	0.92207
488	0.566574
489	0.563382
490	-0.302965
491	1.16356
492	0.171233
493	0.17094
494	-0.5137
495	0.299979
496	0.0855432
497	-0.0855432
498	0.171013
499	0.341152
500	0.339992
501	0
502	-0.254885
503	0.127524
504	-0.425714
505	0.891915
506	0.16899
507	0.337126
508	0.12613
509	0.335571
510	0.167364
511	-0.0418148
512	-0.377122
513	-0.336417
514	0.504203
515	0.501673
516	0.747822
517	-0.414766
518	0.124611
519	0.455582
520	0.206398
521	0.862251
522	0.814337
523	-0.487806
524	0.0814664
525	-0.0407249
526	0.244101
527	-0.162668
528	-1.39347
529	-0.372132
530	0.660613
531	-0.743498
532	-0.041468
533	0.289915
534	-0.289915
535	0.537747
536	-0.537747
537	-0.791176
538	-0.209249
539	-0.0419024
540	-0.504203
541	-1.61362
542	-1.16255
543	0.302703
544	0.301789
545	-0.344977
546	0.129506
547	0.473425
548	-0.128894
549	0.128894
550	1.66067
551	0.126609
552	-0.0843882
553	0.126556
554	-0.507186
555	0.0847099
556	0.464626
557	0.084246
558	0
559	0.71324
560	-0.209249
561	-0.209688
562	0.29344
563	0.167294
564	0
565	-0.586758
566	-0.0420433
567	0.879219
568	0.788877
569	0.782702
570	-0.782702
571	-0.248447
572	0
573	-0.415456
574	-0.920124
575	0.46112
576	0.125392
577	0.707599
578	-0.665837
579	-1.26052
580	-0.296422
581	-0.723561
582	0.383714
583	0.80526
584	-0.465412
585	-0.42499
586	-0.213174
587	0.468385
588	0.0424719
589	-0.255102
590	-0.726344
591	-0.645302
592	1.6692
593	0.42355
594	0.0422565
595	0.589724
596	0.209776
597	-0.0838574
598	-0.378231
599	0.126236
600	-0.421408
601	-0.33841
602	-0.169635
603	0.211999
604	0.549104
605	0.16835
606	0.545189
607	-0.083682
608	0.209074
609	-0.250941
610	-0.167645
611	0.0838574
612	-0.251784
613	-0.0840689
614	0.712343
615	0.624352
616	0.661706
617	0.452396
618	-0.576133
619	0.329625
620	0
621	0.246508
622	-0.287652
623	0.123381
624	0.410173
625	0.326931
626	0.325866
627	-0.122075
628	0.162734
629	0.243605
630	0.364299
631	0.322711
632	0.522194
633	0.63898
634	-0.239139
635	-0.0399122
636	-0.319872
637	-0.0400561
638	-0.401446
639	-0.201329
640	0.682871
641	0.19996
642	0.518033
643	0
644	-0.43816
645	-0.801607
646	0.401607
647	0.2002
648	0.439035
649	0.516386
650	-0.317461
651	0.158856
652	0.237812
653	0.434526
654	0.11818
655	0.196657
656	-0.0786164
657	0.117901
658	-0.0785855
659	0.313972
660	0.117486
661	-0.117486
662	-0.826288
663	-0.118601
664	0
665	-0.316957
666	-1.03711
667	-0.200682
668	0.240771
669	0.120168
670	0.040024
671	-0.481349
672	-0.160966
673	0.442034
674	0.120216
675	0.24
676	0.478279
677	0.396826
678	-0.0396118
679	-0.11893
680	-0.397457
681	-1.00061
682	-0.686178
683	0.121433
684	-0.0404613
685	-1.05778
686	0.326664
687	0.203625
688	-0.285191
689	0.244499
690	0.081367
691	0.446339
692	0.36371
693	0.0806452
694	-0.322972
695	-0.202388
696	-0.568876
697	-0.244798
698	0.163265
699	-0.0815994
700	-0.245198
701	-0.1638
702	0.734997
703	-0.0406918
704	-0.0814332
705	-0.28554
706	-1.73057
707	-0.625393
708	1.20559
709	-0.289675
710	-0.248963
711	-1.12807
712	0.293686
713	0.668061
714	0.249377
715	0.165906
716	0.08285
717	0
718	1.52047
719	0.325733
720	0.284149
721	0.404531
722	0.0403633
723	-0.0403633
724	-0.485634
725	0.243112
726	0.161747
727	0.201816
728	1.44118
729	0.673403
730	-0.197589
731	-0.0395648
732	0.591834
733	-0.236314
734	0.628933
735	0.54709
736	0.077912
737	0.233372
738	-0.116618
739	-0.389712
740	0.0390396
741	0.54496
742	0.65777
743	0.192641
744	-0.0770119
745	0.307693
746	0
747	0.115141
748	-0.115141
749	-0.0384098
750	0.459947
751	0.571975
752	-0.419128
753	0.0763359
754	0.152497
755	0.569802
756	0.71712
757	-0.0752445
758	-0.112973
759	0.451129
760	-0.677458
761	-0.416273
762	-0.151803
763	-0.954024
764	-0.847136
765	0.61681
766	0.230326
767	0.191534
768	-0.421861
769	-0.0384394
770	0.498563
771	-0.191461
772	0.114921
773	-0.191608
774	-0.191975
775	0.11523
776	0.306631
777	0.267533
778	0.684674
779	0.491587
780	0.113101
781	-0.453173
782	-1.02721
783	1.36728
784	-3.14202
785	-0.272851
786	0.0780336
787	0.389257
788	-0.350263
789	-0.586512
790	-0.0784621
791	0.352596
792	0.234375
793	0.467109
794	0.619437
795	0.154262
796	-0.192864
797	0.115763
798	0.269594
799	-0.849754
800	0.0387822
801	0.193686
802	-0.0387072
803	0.309239
804	0.807231
805	0.0382775
806	0.191168
807	0.152672
808	0.41865
809	-0.342401
810	-0.0762486
811	-0.152672
812	-0.613029
813	0.574824
814	-0.26784
815	-0.57637
816	0.154024
817	-1.47289
818	-1.25738
819	-0.15829
820	-0.0792393
821	-2.48809
822	0.405516
823	0.886388
824	-0.200763
825	-0.241449
826	-0.201654
827	0.362684
828	0.401446
829	-0.200521
830	-1.17102
831	0.445796
832	-0.242915
833	-0.85488
834	-1.10998
835	0.0413309
836	0.576845
837	0.736802
838	0.650409
839	-0.243408
840	0.445796
841	1.08587
842	0.119928
843	-0.119928
844	-0.400802
845	0
846	0.0401526
847	-0.684796
848	-0.121335
849	0.564973
850	-0.0402495
851	-0.362977
852	-0.202225
853	0.926865
854	0.520105
855	-0.119784
856	-0.159936
857	-0.481349
858	-0.929112
859	-0.733201
860	0.326531
861	-1.60201
862	0.289436
863	-0.165289
864	-0.62228
865	0.249377
866	-0.332641
867	-1.72237
868	-0.254561
869	0.888143
870	0.294303
871	-0.843175
872	-0.296799
873	1.26584
874	-0.0419375
875	0
876	0.502093
877	0.66556
878	-0.124456
879	0.414251
880	0.0826446
881	-0.289556
882	0
883	0.413395
884	0.288363
885	0.205465
886	0.0820681
887	0.531807
888	-0.040808
889	-0.286123
890	-0.0819001
891	-0.988069
892	-0.373057
893	0.290276
894	0.124147
895	0.7006
896	-0.535311
897	-0.248037
898	0.124095
899	0.165221
900	0
901	-0.662528
902	0.166044
903	0.620221
904	0.943597
905	1.05606
906	0.362977
907	-0.241838
908	-0.404368
909	0.485045
910	-0.0806777
911	-0.121139
912	-0.121286
913	0.242424
914	-0.201979
915	-0.445796
916	-0.244002
917	-0.407997
918	-0.615134
919	-0.0823045
920	0.246711
921	-1.0735
922	-0.666391
923	-0.292949
924	-0.293809
925	-0.210394
926	-1.785
927	0.4279
928	0.596
929	-0.21245
930	0.254885
931	0.169563
932	0.169276
933	-1.01998
934	-1.16006
935	-1.87574
936	0.833155
937	0.479199
938	0.260417
939	-0.521514
940	-0.305477
941	1.38891
942	0.129227
943	0.0430385
944	0.257843
945	0.641713
946	0.17043
947	-0.597781
948	0.597781
949	0.424809
950	-0.46739
951	-0.384041
952	0.809031
953	0.169492
954	0.169205
955	-0.381114
956	0.465609
957	1.13375
958	0.790189
959	0.0828157
960	0.0413822
961	0.082713
962	0.453703
963	0.20555
964	-0.164406
965	-0.205888
966	0.123584
967	1.18684
968	-0.162866
969	0.487806
970	-0.61013
971	0.528994
972	-0.121827
973	0.202963
974	-1.18296
975	0.368626
976	0.326531
977	-0.654132
978	-0.534651
979	0.164813
980	0.451839
981	0.1638
982	-0.327869
983	0.573067
984	0.0815994
985	0.569339
986	0.404695
987	0.0807428
988	0.683695
989	0.0801282
990	0.04004
991	-0.120168
992	-0.321156
993	-0.1207
994	-0.241838
995	-0.0807428
996	-0.283114
997	0.0809717
998	1.00665
999	-0.0801603
1000	0.20028
1001	-0.160192
1002	-0.764437
1003	-0.283114
1004	0.444535
1005	-0.363563
1006	-0.649617
1007	0.851759
1008	0.201735
1009	0.562702
1010	0.599402
1011	0.159236
1012	-0.318725
1013	-0.520105
1014	-0.522824
1015	0.522824
1016	0.560001
1017	0.477518
1018	0.948249
1019	0
1020	0.97829
1021	0.272215
1022	0.155219
1023	0.232378
1024	0.309
1025	0.61515
1026	-0.307102
1027	0.0384394
1028	0.230326
1029	-0.345689
1030	-0.269698
1031	0.346621
1032	0.727833
1033	0.380953
1034	-0.266515
1035	-0.229008
1036	-0.114701
1037	-0.306514
1038	0.229973
1039	-0.306749
1040	-0.88718
1041	0.193536
1042	0
1043	0.23175
1044	-0.347826
1045	0
1046	0.309239
1047	0.92202
1048	0.38168
1049	0.266312
1050	0
1051	0.341362
1052	0.415644
1053	-0.264301
1054	0.226586
1055	0.226074
1056	0.45062
1057	0
1058	-0.45062
1059	-0.0376435
1060	0.225649
1061	0.412372
1062	0.298842
1063	-0.0746269
1064	-0.711747
1065	-0.48992
1066	-0.189072
1067	0.528503
1068	0.375799
1069	0.112465
1070	0.932321
1071	0.850125
1072	0.147113
1073	0.183587
1074	-0.921326
1075	0.36955
1076	0.991016
1077	0
1078	0.691541
1079	0.253577
1080	0.756897
1081	0.322639
1082	-0.646322
1083	-0.0360295
1084	-0.397184
1085	0.144613
1086	0.360621
1087	0.359325
1088	-0.611623
1089	0.180278
1090	1.50164
1091	0.283487
1092	-0.177085
1093	0.247832
1094	0.0353544
1095	0.774652
1096	0.489854
1097	-0.104767
1098	-0.455263
1099	0.80406
1100	-0.558661
1101	0.836825
1102	0.138793
1103	0.0346681
1104	-0.451625
1105	0.347585
1106	0.588135
1107	0.0344887
1108	-0.241671
1109	0.826166
1110	-0.41223
1111	0.48077
1112	0
1113	-0.102828
1114	-0.0342994
1115	-0.171674
1116	-0.378723
1117	-2.26767
1118	-0.672688
1119	0.672688
1120	0.843294
1121	0.13986
1122	0.731074
1123	0.725768
1124	-0.275862
1125	0.275862
1126	0.0688468
1127	0.0687995
1128	0.171792
1129	0.445282
1130	-0.205269
1131	0.273598
1132	0.510987
1133	-0.750345
1134	0
1135	1.29254
1136	1.10907
1137	0.0668226
1138	0
1139	0.665781
1140	-0.066379
1141	-0.332558
1142	0.232906
1143	0.331785
1144	-0.431536
1145	-0.266489
1146	-0.468072
1147	0.634711
1148	0.796024
1149	0.132057
1150	0.0989283
1151	0.591523
1152	0.196399
1153	0.359067
1154	0.617186
1155	0.355585
1156	-0.193799
1157	-0.0970403
1158	-0.421599
1159	-1.27557
1160	-0.859509
1161	0.826588
1162	1.14586
1163	-0.424075
1164	0.424075
1165	1.06849
1166	0.225189
1167	-0.0964475
1168	0.2249
1169	0.160334
1170	-0.675135
1171	-0.420237
1172	-0.715218
1173	-0.261353
1174	0.293974
1175	-1.01624
1176	-1.72819
1177	0.701523
1178	0.76273
1179	0.756956
1180	0.523219
1181	0.0652103
1182	0.16284
1183	0.357317
1184	0.903815
1185	0.512822
1186	0.0319642
1187	0.541834
1188	0.791519
1189	-0.442479
1190	0.694447
1191	0.658413
1192	0.560924
1193	0.681328
1194	0.400432
1195	0.490648
1196	-0.582913
1197	-0.586331
1198	-0.0619195
1199	0.5559
1200	0.491552
1201	0.397615
1202	-0.213904
1203	-0.0611995
1204	-0.799021
1205	-0.401917
1206	-0.0309837
1207	-1.21592
1208	-0.534677
1209	0.377715
1210	0.25102
1211	0.81149
1212	-0.124417
1213	0
1214	-0.530505
1215	-0.0625978
1216	0.250156
1217	-0.438185
1218	-0.629329
1219	0.346621
1220	2.02405
1221	1.16459
1222	-0.335724
1223	0.94326
1224	0.392928
1225	0.0904568
1226	0.870223
1227	0.208924
1228	-0.208924
1229	0.29833
1230	0.178571
1231	-0.566574
1232	0.0298998
1233	0.387887
1234	1.33118
1235	0.556778
1236	0.959728
1237	-0.0289477
1238	-0.872352
1239	-0.732819
1240	0.557431
1241	0.902875
1242	0.779787
1243	0.459243
1244	-0.171969
1245	-0.488858
1246	-0.375452
1247	0.0867679
1248	-0.69626
1249	0.609493
1250	1.06491
1251	2.79482
1252	-1.65618
1253	0.141423
1254	-0.113122
1255	0.0848536
1256	-0.851794
1257	1.02129
1258	0.871159
1259	0
1260	0.669272
1261	2.1175
1262	-0.902015
1263	-2.50222
1264	-1.36057
1265	0.82422
1266	1.29361
1267	-0.307822
1268	-0.280663
1269	-0.422476
1270	-0.424269
1271	-2.00408
1272	0.634191
1273	0.458716
1274	0.485092
1275	0.878566
1276	0.225479
1277	-0.0281571
1278	1.23147
1279	0.111204
1280	0.554172
1281	1.20847
1282	0.245399
1283	-0.300014
1284	-0.465435
1285	1.41692
1286	0
1287	-1.36205
1288	0.792246
1289	0.893952
1290	0.188603
1291	-0.702326
1292	0
1293	-0.325822
1294	0.190192
1295	0.13563
1296	-0.108489
1297	-0.0814443
1298	-0.544664
1299	-0.136631
1300	0.518207
1301	0.190243
1302	0.865104
1303	0.376142
1304	0.614893
1305	-0.641713
1306	-1.89553
1307	-0.989019
1308	0.633001
1309	-1.74351
1310	-2.43018
1311	2.12262
1312	0.753247
1313	0.38835
1314	0.165975
1315	-0.63774
1316	0.610096
1317	1.29105
1318	0.788369
1319	0.0812018
1320	-0.352352
1321	0.0542888
1322	-0.899556
1323	0.164159
1324	1.0064
1325	-0.325292
1326	0.40645
1327	0.512476
1328	0.456315
1329	0.267451
1330	0.585887
1331	0.132679
1332	0.211921
1333	0.448846
1334	0.813333
1335	-0.130736
1336	0.156863
1337	0.104439
1338	-0.812267
1339	0.262743
1340	0.523424
1341	-0.523424
1342	-1.13473
1343	0.740352
1344	0.210526
1345	-0.897814
1346	-0.159278
1347	0.477075
1348	0.184916
1349	0.105513
1350	-0.211138
1351	-1.14257
1352	-0.589656
1353	0.643089
1354	-1.12813
1355	-0.135153
1356	0.835022
1357	0.561724
1358	0.664631
1359	-0.691308
1360	-0.053376
1361	0.373035
1362	0.662693
1363	0.211138
1364	-0.0527426
1365	0.131804
1366	0.131631
1367	0.942662
1368	3.38234
1369	0.677969
1370	-1.86921
1371	-0.53688
1372	0.613342
1373	0.93826
1374	0.126119
1375	0.553043
1376	0.175329
1377	0.349738
1378	0.0997009
1379	0.917551
1380	0.221921
1381	0.368777
1382	0.514014
1383	0.0732154
1384	-0.538162
1385	0.0490436
1386	0.586655
1387	0.3892
1388	1.20658
1389	3.51161
1390	-1.39928
1391	0.140812
1392	0.257642
1393	0
1394	-1.20016
1395	0.0236714
1396	0.354401
1397	-0.0943842
1398	-0.615678
1399	0.308313
1400	0.966191
1401	0.840734
1402	1.11009
1403	0.229727
1404	0.412183
1405	-0.595922
1406	0.0459664
1407	-1.36497
1408	0.232666
1409	0.13934
1410	-1.70864
1411	0.471032
1412	-0.589138
1413	-1.3324
1414	-0.023955
1415	0.930017
1416	0.189708
1417	-0.0948092
1418	-0.737835
1419	0.095511
1420	-0.143301
1421	0.429288
1422	-0.0952381
1423	1.34865
1424	0.140911
1425	0.444914
1426	0.442943
1427	-0.069808
1428	-0.0931532
1429	0.603951
1430	0.439053
1431	0.528919
1432	0.594559
1433	-0.0228024
1434	0.0683917
1435	0.0227868
1436	0.681202
1437	1.37096
1438	0.42321
1439	-0.53488
1440	0.756905
1441	0.155125
1442	-0.0664525
1443	0.57446
1444	0
1445	0.527358
1446	-6.84764
1447	2.25094
1448	1.66121
1449	-0.633917
1450	-0.820985
1451	-2.73926
1452	0.773653
1453	0.396225
1454	-0.676861
1455	-0.752237
1456	-2.94526
1457	-0.854185
1458	1.74932
1459	-0.313593
1460	-0.411573
1461	0.314885
1462	0.722895
1463	1.00335
1464	1.22846
1465	0
1466	0.748542
1467	-0.654667
1468	-0.800758
1469	0.118161
1470	0.0708299
1471	-0.0708299
1472	-0.14181
1473	0.165426
1474	2.07976
1475	1.65141
1476	0.43128
1477	1.03651
1478	0.246278
1479	1.15608
1480	2.55333
1481	-0.431873
1482	-0.651327
1483	-0.699456
1484	-0.109733
1485	-0.705159
1486	0.968317
1487	0.13132
1488	-0.0875274
1489	-0.658909
1490	0.395866
1491	-0.109806
1492	-0.352191
1493	0.19826
1494	0.570552
1495	0
1496	-0.328767
1497	0.591005
1498	0.152655
1499	-1.02947
1500	0.0660284
1501	-0.839598
1502	-0.0221902
1503	0.155228
1504	-0.244038
1505	-0.155607
1506	1.96063
1507	-0.942473
1508	0.197998
1509	-0.617286
1510	-0.376648
1511	0.22173
1512	0.728239
1513	-0.706093
1514	-0.354925
1515	-0.111173
1516	0.421801
1517	-1.40549
1518	-0.789448
1519	0.496952
1520	0.830253
1521	-0.178931
1522	-1.19357
1523	0.74484
1524	-0.676898
1525	-1.02402
1526	-1.15023
1527	-0.254836
1528	1.24483
1529	0.160238
1530	-0.596469
1531	-0.253427
1532	0.345423
1533	0.73294
1534	0.478089
1535	0.430596
1536	1.25844
1537	0.0669718
1538	-0.469747
1539	-0.991446
1540	-1.13871
1541	-0.045819
1542	-0.137583
1543	-0.367817
1544	1.41781
1545	-0.500798
1546	1.58482
1547	-0.157356
1548	0.247163
1549	0.871417
1550	0.819768
1551	-0.110387
1552	0.352812
1553	-0.198303
1554	0.440142
1555	0.591135
1556	0.544249
1557	-0.0434311
1558	-0.065182
1559	0.238793
1560	1.24975
1561	0.916558
1562	-0.148636
1563	0.993771
1564	0.963157
1565	0.312078
1566	0.930432
1567	0.574596
1568	-1.31825
1569	1.01084
1570	0.225525
1571	-0.430991
1572	-0.763914
1573	0.537413
1574	-0.061862
1575	0.452769
1576	-0.349687
1577	0.554815
1578	-0.472426
1579	0.574832
1580	-0.492511
1581	-1.40877
1582	0.789697
1583	-0.602099
1584	-0.145879
1585	0.0208529
1586	-0.0625717
1587	-0.397199
1588	-0.356731
1589	0.398616
1590	-0.230584
1591	-0.821836
1592	-0.360361
1593	0.84585
1594	1.04735
1595	0.809385
1596	-0.45577
1597	0.020762
1598	0.352295
1599	0.351059
1600	-0.599609
1601	-0.415628
1602	-0.166736
1603	-1.64042
1604	-0.0848536
1605	-0.553311
1606	-1.05117
1607	-0.692494
1608	1.20873
1609	-0.473119
1610	-0.865994
1611	-1.60003
1612	-0.53168
1613	-0.937298
1614	0.044833
1615	-1.17224
1616	2.26442
1617	0.199314
1618	0.837194
1619	0.590617
1620	0.0218079
1621	-0.502788
1622	0.785859
1623	-1.86552
1624	1.25483
1625	1.41199
1626	0.129338
1627	-0.237248
1628	0.129478
1629	-0.432246
1630	0.108237
1631	0.410235
1632	0.68714
1633	-0.300043
1634	-0.387097
1635	0.665739
1636	0.746352
1637	0.127389
1638	-0.340064
1639	-0.085197
1640	0.827591
1641	1.00926
1642	0.500836
1643	0.436183
1644	0.599237
1645	0.308547
1646	-0.226175
1647	0.28777
1648	0.858374
1649	0.345353
1650	-0.0202819
1651	0.0405597
1652	0.0608088
1653	-0.0405351
1654	0
1655	0.22274
1656	0.0808734
1657	-0.811693
1658	-0.163132
1659	0.792768
1660	0.4646
1661	0.0402982
1662	0
1663	-1.37933
1664	0.407665
1665	0.406009
1666	-0.0810701
1667	-0.467433
1668	-1.04434
1669	-1.20109
1670	2.04152
1671	-0.224788
1672	-0.122825
1673	-1.17442
1674	-0.748911
1675	-0.986263
1676	1.21569
1677	-0.104221
1678	-0.606633
1679	-0.189016
1680	-0.442432
1681	-0.89078
1682	1.207
1683	0.79665
1684	0.271088
1685	0.166459
1686	-0.604735
1687	-0.524275
1688	-0.379187
1689	-0.698933
1690	-2.06149
1691	2.40097
1692	-0.233273
1693	-0.66035
1694	-1.18243
1695	-0.0648999
1696	0.797504
1697	-0.387181
1698	-1.41077
1699	0.152889
1700	-0.481296
1701	-0.549754
1702	-1.44367
1703	1.81783
1704	1.65581
1705	0.0216053
1706	0.345051
1707	-0.0430663
1708	-0.4966
1709	1.37577
1710	-0.0640683
1711	0.405075
1712	-0.298317
1713	-0.51348
1714	-0.775198
1715	0.172786
1716	-0.216029
1717	-0.0216286
1718	-0.238224
1719	-0.41282
1720	-0.17433
1721	0.91186
1722	0.280566
1723	-0.0646761
1724	-1.71837
1725	2.04133
1726	0.983965
1727	1.31108
1728	-1.03475
1729	-0.809894
1730	-0.838084
1731	0.323172
1732	-0.474343
1733	-0.563504
1734	-0.632293
1735	0.043735
1736	-0.988693
1737	-0.88712
1738	-0.491292
1739	1.04666
1740	-0.599935
1741	0.0891067
1742	-1.07456
1743	-0.1126
1744	1.56498
1745	1.97678
1746	-0.304945
1747	1.19268
1748	0.901294
1749	0.490145
1750	-0.51151
1751	-0.686109
1752	-0.755861
1753	0.798882
1754	0.0859845
1755	0
1756	0
1757	-0.236636
1758	-0.778382
1759	0.649072
1760	0.043122
1761	-0.0862627
1762	0.452051
1763	0.235976
1764	-1.01218
1765	0.862074
1766	0.128673
1767	-0.515687
1768	-0.366894
1769	-0.194784
1770	0.238018
1771	-0.1947
1772	-0.695353
1773	-1.49388
1774	0.110607
1775	-0.0221117
1776	-1.29091
1777	-0.539085
1778	0.292365
1779	0.76063
1780	0.355951
1781	-0.467447
1782	-0.739002
1783	0.493275
1784	0.44633
1785	-0.423966
1786	-0.223864
1787	-0.201907
1788	-1.44766
1789	-0.159617
1790	-0.457457
1791	-0.690134
1792	-1.74646
1793	-0.423729
1794	1.52174
1795	-0.116239
1796	1.20233
1797	-0.114982
1798	0.0690052
1799	0.321396
1800	-0.344392
1801	-0.230256
1802	0.161235
1803	-0.0921022
1804	-0.346141
1805	1.10346
1806	0.728933
1807	0.362483
1808	0.0226116
1809	-0.0452284
1810	-0.317173
1811	-0.660219
1812	-0.0685479
1813	0.66067
1814	0.0680967
1815	-0.0453926
1816	-0.455063
1817	0.432359
1818	0.136147
1819	0.0226732
1820	-0.113417
1821	-0.409371
1822	0.0683449
1823	0.409091
1824	0.20392
1825	-0.158568
1826	0.0679887
1827	0.632342
1828	0.269784
1829	-0.22477
1830	0.112448
1831	-0.225023
1832	0.897068
1833	0.423305
1834	0
1835	0
1836	-0.0667186
1837	0.155607
1838	0.133185
1839	0.729366
1840	0.154032
1841	0.373094
1842	0.153223
1843	-0.35057
1844	-0.131781
1845	0.504221
1846	0.0218651
1847	0.61029
1848	0.800783
1849	-0.10784
1850	-0.151172
1851	-0.303031
1852	0.389442
1853	0.10791
1854	0.494891
1855	0.620522
1856	-0.448959
1857	0.342246
1858	0.404902
1859	0.276097
1860	0.423281
1861	-0.0422476
1862	-0.402245
1863	0.0212112
1864	0.127173
1865	-0.914997
1866	-0.192575
1867	0.895528
1868	0.676965
1869	-0.126582
1870	-0.190174
1871	-0.0211528
1872	1.11498
1873	0.104548
1874	0.104439
1875	0.0834725
1876	0.229191
1877	0.18713
1878	0.0207706
1879	0.186741
1880	-0.415456
1881	-0.66834
1882	-0.609566
1883	-0.592093
1884	-0.787825
1885	0.787825
1886	-0.127334
1887	0.360361
1888	0.232485
1889	0.126582
1890	0.986056
1891	1.16232
1892	0.473495
1893	0.430373
1894	0
1895	0.20429
1896	-0.286123
1897	0.449255
1898	0.101823
1899	-0.510153
1900	-0.615639
1901	-0.102976
1902	0.102976
1903	-0.226687
1904	0.18551
1905	0.102912
1906	0
1907	-0.329693
1908	-1.09994
1909	0
1910	-0.0208703
1911	-0.250784
1912	-0.230439
1913	-0.884775
1914	-1.25627
1915	0.768414
1916	-0.276802
1917	0.0426348
1918	-1.26543
1919	-0.0647738
1920	-1.23874
1921	0.0437254
1922	0.174711
1923	-2.02784
1924	0.842577
1925	0.440626
1926	-0.728078
1927	-1.44979
1928	-1.40274
1929	1.62715
1930	0.0672269
1931	-0.404041
1932	1.69496
1933	0.485331
1934	-0.861979
1935	-0.511852
1936	-0.312849
1937	-0.899287
1938	-0.930239
1939	0.885062
1940	1.25731
1941	-0.0446329
1942	-0.492281
1943	0.134499
1944	0.111944
1945	-0.651029
1946	-1.61202
1947	-2.31545
1948	0.677019
1949	0
1950	-0.958511
1951	-0.0469925
1952	-0.305991
1953	0.798314
1954	0.791991
1955	0.0927644
1956	-0.814621
1957	-1.34104
1958	-0.641561
1959	0.0953062
1960	-2.48355
1961	-0.04884
1962	0.730108
1963	1.03728
1964	-0.819282
1965	-1.65898
1966	-0.790323
1967	-2.96952
1968	-0.435173
1969	4.39162
1970	-0.0491159
1971	-0.295203
1972	-0.419702
1973	0.665765
1974	0.807739
1975	0.0974659
1976	-1.5215
1977	-0.173246
1978	0.148515
1979	0.591864
1980	-1.18725
1981	-0.0248849
1982	-1.45402
1983	-0.126342
1984	-0.278516
1985	2.33064
1986	-0.820798
1987	-0.576082
1988	0.275931
1989	1.39306
1990	0.958827
1991	0.75564
1992	-2.68258
1993	2.85242
1994	1.13295
1995	-0.86664
1996	0.024175
1997	0.410084
1998	-0.048158
1999	-0.507064
[truncated: 13,636 more rows]
