# Supplementary material for: Time-varying asymmetry and tail thickness in long series of daily financial returns
Source: publisher site journal article supplement (doi:10.1515/snde-2017-0071), 2018-10-02
Supplement: Supplementary file 443 [file data1_s&p500__L1_pred_H1.xlsx]

## Sheet: 1
	Var1	Var2	Var3	Var4	Var5	Var6	Var7	Var8	Var9	Var10	Var11	Var12	Var13	Var14	Var15	Var16	Var17	Var18	Var19	Var20	Var21	Var22	Var23	Var24	Var25
1	1	154	0.16389	0.0421741	1.85048	0.164	0.196	0.396479	1111	0.109111	#N/A	#N/A	#N/A	0.355593	20	88899	2222	0.025	-3.136	0.05	-2.188	0.075	-1.723	0.1	-1.423
2	1	332	0.836457	0.122407	0.967225	0.154	0.144	0.739909	1111	-0.175516	0.565037	0.277508	0.212642	0.262622	20	65656	2222	0.025	-1.4425	0.05	-1.013	0.075	-0.798	0.1	-0.655
3	1	510	0.862251	0.135638	0.526593	0.1583	0.1796	0.953085	1111	0.814337	0.26236	0.933578	0.443187	0.259798	20	64950	2222	0.025	-0.9067	0.05	-0.6724	0.075	-0.5411	0.1	-0.4479
4	1	688	-0.0815994	-0.00210516	0.438378	0.0255	0.0465	1.30451	1111	-0.245198	0.755082	0.209769	0.161572	0.234262	20	58566	2222	0.025	-0.859	0.05	-0.643	0.075	-0.527	0.1	-0.448
5	1	866	0.66556	0.122048	0.733358	0.161	0.192	0.708083	1111	-0.124456	0.581361	0.311361	0.193772	0.20705	20	51763	2222	0.025	-1.372	0.05	-1.012	0.075	-0.814	0.1	-0.677
6	1	1044	0.226074	0.0529044	0.514083	0.0725	0.07	1.05523	1111	0.45062	0.60538	0.833658	0.230222	0.177247	20	44312	2222	0.025	-0.9245	0.05	-0.688	0.075	-0.56	0.1	-0.472
7	1	1222	0.387887	0.105275	0.621227	0.1265	0.139	0.777416	1111	1.33118	0.0622607	0.981566	0.909248	0.211454	20	52864	2222	0.025	-1.165	0.05	-0.88	0.075	-0.7205	0.1	-0.6075
8	1	1400	0.471032	0.194816	1.04596	0.242	0.311	0.57028	1111	-0.589138	0.23842	0.154051	0.505245	0.144147	20	36037	2222	0.025	-1.875	0.05	-1.345	0.075	-1.062	0.1	-0.869
9	1	1578	0.398616	0.107812	0.653488	0.129	0.166	0.700289	1111	-0.230584	0.537186	0.271828	0.223092	0.103887	20	25972	2222	0.025	-1.237	0.05	-0.96	0.075	-0.797	0.1	-0.679
10	1	1756	-0.515687	-0.0295611	0.776068	-0.0185	0.0045	0.557809	1111	-0.366894	0.484204	0.315259	0.236469	0.126239	20	31560	2222	0.025	-1.6055	0.05	-1.3045	0.075	-1.1215	0.1	-0.988
11	1	1934	-0.651029	-0.0753305	0.653351	-0.0795	-0.0845	0.696182	1111	-1.61202	0.0333834	0.0121062	1.19052	0.0977432	20	24436	2222	0.025	-1.354	0.05	-1.1085	0.075	-0.961	0.1	-0.853
12	1	2112	0.0899281	0.0375788	0.549791	0.0586	0.0654	0.990477	1111	0.112296	#N/A	#N/A	#N/A	0.100475	20	25119	2222	0.025	-1.0373	0.05	-0.7752	0.075	-0.6334	0.1	-0.5357
13	1	2290	0.0184179	0.0348355	0.658822	0.0575	0.067	0.707038	1111	2.18588	0.00323634	0.998896	1.79929	0.127047	20	31762	2222	0.025	-1.3135	0.05	-1.023	0.075	-0.8565	0.1	-0.738
14	1	2468	0.191421	0.0587721	0.584896	0.082	0.0975	0.828776	1111	-0.191421	0.659668	0.290768	0.176799	0.0853033	20	21326	2222	0.025	-1.1495	0.05	-0.8775	0.075	-0.7235	0.1	-0.6155
15	1	2646	-0.6264	-0.0676476	0.625133	-0.0695	-0.058	0.772738	1111	0	0.76466	0.553965	0.129842	0.127239	20	31810	2222	0.025	-1.282	0.05	-1.038	0.075	-0.893	0.1	-0.789
16	1	2824	0.826577	0.159982	0.573042	0.182	0.1943	0.887462	1111	0.0914216	0.855097	0.421378	0.117996	0.121675	20	30419	2222	0.025	-1.0146	0.05	-0.7363	0.075	-0.584	0.1	-0.478
17	1	3002	0.0416696	0.0445684	0.658177	0.0791	0.0931	0.832511	1111	-0.347778	0.488083	0.204208	0.255566	0.0855113	20	21378	2222	0.025	-1.2303	0.05	-0.9225	0.075	-0.7549	0.1	-0.6386
18	1	3180	0.169463	0.0649379	0.79099	0.0615	0.0625	0.545868	1111	0.32119	0.507737	0.638609	0.210796	0.0940032	20	23501	2222	0.025	-1.492	0.05	-1.212	0.075	-1.038	0.1	-0.908
19	1	3358	0.0565052	0.0456105	0.49172	0.055	0.0648	1.14081	1111	-0.254525	0.684077	0.205102	0.186302	0.0981592	20	24540	2222	0.025	-0.8786	0.05	-0.662	0.075	-0.5439	0.1	-0.4611
20	1	3536	0.219965	0.0671411	0.37555	0.0837	0.0933	1.28045	1111	0.232378	1.13626	0.683768	0.103802	0.128859	20	32215	2222	0.025	-0.7179	0.05	-0.5383	0.075	-0.4374	0.1	-0.3672
21	1	3714	-0.327754	-0.0107326	0.328257	0.0001	0.0042	1.45536	1111	-0.352361	0.568733	0.119727	0.22079	0.0974512	20	24363	2222	0.025	-0.6844	0.05	-0.5346	0.075	-0.4499	0.1	-0.3897
22	1	3892	1.89664	0.327104	0.652322	0.3425	0.356	0.675221	1111	0.0118154	0.55506	0.291312	0.212781	0.124211	20	31053	2222	0.025	-1.0145	0.05	-0.746	0.075	-0.587	0.1	-0.471
23	1	4070	-0.813013	-0.0876917	0.702402	-0.0755	-0.0555	0.628682	1111	0.39604	0.466919	0.77028	0.286057	0.0968712	20	24218	2222	0.025	-1.5155	0.05	-1.237	0.075	-1.0705	0.1	-0.948
24	1	4248	0.0122888	0.0333409	0.646043	0.045	0.059	0.673847	1111	-0.270703	0.56657	0.299785	0.206474	0.167151	20	41788	2222	0.025	-1.283	0.05	-1.027	0.075	-0.8735	0.1	-0.761
25	1	4426	-0.716328	-0.0772226	0.595482	-0.0653	-0.0534	0.829834	1111	-0.606126	0.393122	0.149532	0.330374	0.142083	20	35521	2222	0.025	-1.2797	0.05	-1.0126	0.075	-0.862	0.1	-0.7557
26	1	4604	-0.447201	-0.0333203	0.685301	-0.0375	-0.0265	0.653561	1111	0.447201	0.455065	0.782494	0.292009	0.0934593	20	23365	2222	0.025	-1.371	0.05	-1.1235	0.075	-0.972	0.1	-0.8605
27	1	4782	-0.195752	0.00304704	0.762837	0.028	0.0565	0.615565	1111	-1.02413	0.160627	0.0772823	0.695823	0.0910113	20	22753	2222	0.025	-1.571	0.05	-1.2335	0.075	-1.0385	0.1	-0.899
28	1	4960	0.581012	0.129066	0.47604	0.1375	0.1533	0.919932	1111	-0.0813421	0.783861	0.310111	0.14638	0.0941232	20	23531	2222	0.025	-0.839	0.05	-0.6522	0.075	-0.5389	0.1	-0.4566
29	1	5138	-0.995795	-0.148354	0.926371	-0.135	-0.115	0.476327	1111	0.333035	0.402768	0.711543	0.303084	0.164079	20	41020	2222	0.025	-2.0255	0.05	-1.6625	0.075	-1.445	0.1	-1.284
30	1	5316	0.237365	0.072263	0.535324	0.0799	0.0976	0.806517	1111	0.177655	0.794496	0.578897	0.125703	0.118463	20	29616	2222	0.025	-1.0073	0.05	-0.8058	0.075	-0.6827	0.1	-0.5916
31	1	5494	0.886811	0.179198	0.761031	0.174	0.1925	0.592704	1111	1.21042	0.168993	0.923769	0.687692	0.0821713	20	20543	2222	0.025	-1.3045	0.05	-1.03	0.075	-0.862	0.1	-0.737
32	1	5672	-0.260358	-0.0162568	0.658553	-0.0135	0.0055	0.667316	1111	-0.197966	0.626411	0.380675	0.165602	0.133087	20	33272	2222	0.025	-1.3265	0.05	-1.0825	0.075	-0.9335	0.1	-0.823
33	1	5850	0.419054	0.0934148	0.973452	0.1095	0.1435	0.440392	1111	-0.736841	0.270266	0.183525	0.504948	0.105259	20	26315	2222	0.025	-1.8805	0.05	-1.5115	0.075	-1.286	0.1	-1.1195
34	1	6028	-0.525422	-0.0771088	1.06145	-0.0585	-0.033	0.409138	1111	1.11963	0.189565	0.882959	0.739523	0.109355	20	27339	2222	0.025	-2.237	0.05	-1.822	0.075	-1.571	0.1	-1.387
35	1	6206	0.710953	0.102696	1.68427	0.116	0.167	0.259086	1111	3.33319	0.0316243	0.972677	2.34904	0.179415	20	44854	2222	0.025	-3.271	0.05	-2.643	0.075	-2.257	0.1	-1.973
36	1	6384	0.450239	0.0911425	0.997715	0.105	0.129	0.434926	1111	-0.0627025	0.424969	0.42802	0.231106	0.143491	20	35873	2222	0.025	-1.9295	0.05	-1.545	0.075	-1.3115	0.1	-1.141
37	1	6562	-0.0981836	0.00471542	0.871586	0.0205	0.045	0.494649	1111	0.597426	0.378995	0.763018	0.350702	0.0766114	20	19153	2222	0.025	-1.768	0.05	-1.431	0.075	-1.226	0.1	-1.075
38	1	6740	0.369076	0.0900083	0.746172	0.101	0.1355	0.572723	1111	-0.24266	0.492956	0.313865	0.231199	0.133631	20	33408	2222	0.025	-1.4105	0.05	-1.1375	0.075	-0.967	0.1	-0.8405
39	1	6918	-0.584974	-0.082508	0.613307	-0.075	-0.0565	0.690488	1111	-0.232923	0.657064	0.392883	0.154189	0.0699114	20	17478	2222	0.025	-1.319	0.05	-1.094	0.075	-0.954	0.1	-0.85
40	1	7096	-0.649897	-0.101853	0.858282	-0.0955	-0.072	0.542044	1111	0.952438	0.180428	0.909271	0.682723	0.0776314	20	19408	2222	0.025	-1.818	0.05	-1.475	0.075	-1.2715	0.1	-1.1235
41	1	7274	0.889074	0.180785	0.7764	0.1975	0.226	0.559398	1111	0.371468	0.545539	0.596836	0.187453	0.103507	20	25877	2222	0.025	-1.408	0.05	-1.101	0.075	-0.9165	0.1	-0.7805
42	1	7452	-0.967779	-0.157425	0.774199	-0.13	-0.1055	0.584765	1111	0.0183469	0.572566	0.586453	0.177403	0.0728434	20	18211	2222	0.025	-1.7695	0.05	-1.431	0.075	-1.2335	0.1	-1.0915
43	1	7630	0.536434	0.117903	0.779968	0.137	0.1645	0.558704	1111	-0.464743	0.368178	0.207966	0.358413	0.0693114	20	17328	2222	0.025	-1.4885	0.05	-1.173	0.075	-0.9835	0.1	-0.8455
44	1	7808	-0.474174	-0.0724525	0.941799	-0.0405	0.0015	0.475549	1111	0.318955	0.435826	0.666793	0.263041	0.116143	20	29036	2222	0.025	-2.0365	0.05	-1.632	0.075	-1.394	0.1	-1.2225
45	1	7986	0.439124	0.098244	0.830436	0.1275	0.1655	0.529255	1111	-0.488958	0.352641	0.216151	0.367044	0.19359	20	48398	2222	0.025	-1.638	0.05	-1.2855	0.075	-1.077	0.1	-0.9255
46	1	8164	0.335586	0.0803406	0.72814	0.1015	0.1385	0.603921	1111	0.460726	0.521832	0.708113	0.235169	0.106787	20	26697	2222	0.025	-1.425	0.05	-1.1265	0.075	-0.948	0.1	-0.8175
47	1	8342	-0.0455299	0.0133506	0.733104	0.0315	0.0645	0.62303	1111	-0.678898	0.30855	0.150623	0.431134	0.0882073	20	22052	2222	0.025	-1.4945	0.05	-1.1855	0.075	-1.0035	0.1	-0.8725
48	1	8520	0.246787	0.0684357	0.573492	0.0845	0.108	0.78195	1111	-0.198586	0.635547	0.294563	0.183034	0.114647	20	28662	2222	0.025	-1.1185	0.05	-0.878	0.075	-0.735	0.1	-0.632
49	1	8698	1.96909	0.383045	1.01502	0.408	0.461	0.443192	1111	0.344194	0.439179	0.471955	0.218473	0.114303	20	28576	2222	0.025	-1.703	0.05	-1.283	0.075	-1.034	0.1	-0.853
50	1	8876	0.1441	0.050441	0.639343	0.0555	0.084	0.780963	1111	0.293101	0.690762	0.679276	0.169231	0.110455	20	27614	2222	0.025	-1.213	0.05	-0.945	0.075	-0.7905	0.1	-0.6795
51	1	9054	-0.464304	-0.0607889	0.974905	-0.053	-0.018	0.527482	1111	-0.312343	0.47949	0.368928	0.221734	0.176351	20	44088	2222	0.025	-1.988	0.05	-1.56	0.075	-1.32	0.1	-1.15
52	1	9232	-0.123681	0.00115791	1.15989	0.064	0.1	0.51531	1111	0.777916	0.311835	0.815251	0.438806	0.123087	20	30772	2222	0.025	-2.299	0.05	-1.681	0.075	-1.362	0.1	-1.146
53	1	9410	0.288241	0.0799295	0.848008	0.107	0.139	0.604731	1111	0.127478	0.604261	0.512328	0.16311	0.152731	20	38183	2222	0.025	-1.663	0.05	-1.254	0.075	-1.027	0.1	-0.87
54	1	9430	0.240035	0.0702937	0.765161	0.122	0.1435	0.767315	1111	0.561029	0.509917	0.796782	0.269562	0.0860953	20	21524	2222	0.025	-1.491	0.05	-1.061	0.075	-0.8405	0.1	-0.693
