# Supplementary material for: Time-varying asymmetry and tail thickness in long series of daily financial returns
Source: publisher site journal article supplement (doi:10.1515/snde-2017-0071), 2018-10-02
Supplement: Supplementary file 445 [file data1_s&p500__L1_pred_H2.xlsx]

## Sheet: 1
	Var1	Var2	Var3	Var4	Var5	Var6	Var7	Var8	Var9	Var10	Var11	Var12	Var13	Var14	Var15	Var16	Var17	Var18	Var19	Var20	Var21	Var22	Var23	Var24	Var25
1	2	154	0.16389	0.0291473	2.20843	0.166	0.199	0.374073	1111	1.08461	#N/A	#N/A	#N/A	0.355593	20	88899	2222	0.025	-3.47	0.05	-2.406	0.075	-1.886	0.1	-1.554
2	2	332	0.836457	0.093101	0.99557	0.1245	0.1195	0.733232	1111	-0.616742	0.24212	0.119085	0.470839	0.262622	20	65656	2222	0.025	-1.525	0.05	-1.074	0.075	-0.849	0.1	-0.7
3	2	510	0.862251	0.0711098	0.552141	0.0965	0.1245	0.937339	1111	-0.487806	0.331288	0.113254	0.367904	0.259798	20	64950	2222	0.025	-1.0195	0.05	-0.7675	0.075	-0.6285	0.1	-0.53
4	2	688	-0.0815994	0.0103217	0.450775	0.0395	0.066	1.28374	1111	-0.1638	0.91541	0.270169	0.12685	0.234262	20	58566	2222	0.025	-0.8755	0.05	-0.6495	0.075	-0.528	0.1	-0.4455
5	2	866	0.66556	0.0508126	0.773162	0.095	0.129	0.684405	1111	0.414251	0.584084	0.708076	0.211979	0.20705	20	51763	2222	0.025	-1.541	0.05	-1.147	0.075	-0.934	0.1	-0.786
6	2	1044	0.226074	0.0302779	0.52898	0.0535	0.058	1.01926	1111	0	1.00345	0.446127	0.0988053	0.177247	20	44312	2222	0.025	-0.9995	0.05	-0.7475	0.075	-0.6105	0.1	-0.5175
7	2	1222	0.387887	0.0645495	0.655188	0.09	0.108	0.753517	1111	0.556778	0.488175	0.807419	0.283207	0.211454	20	52864	2222	0.025	-1.28	0.05	-0.972	0.075	-0.7995	0.1	-0.679
8	2	1400	0.471032	0.149346	1.04839	0.196	0.26	0.587638	1111	-1.3324	0.072961	0.0519696	1.07893	0.144147	20	36037	2222	0.025	-1.888	0.05	-1.36	0.075	-1.079	0.1	-0.889
9	2	1578	0.398616	0.0695854	0.681343	0.093	0.131	0.681009	1111	-0.821836	0.193746	0.0834003	0.598086	0.103887	20	25972	2222	0.025	-1.339	0.05	-1.041	0.075	-0.868	0.1	-0.743
10	2	1756	-0.515687	0.0416538	0.800001	0.0575	0.075	0.557551	1111	-0.194784	0.513161	0.363499	0.206866	0.126239	20	31560	2222	0.025	-1.599	0.05	-1.269	0.075	-1.073	0.1	-0.931
11	2	1934	-0.651029	0.0138658	0.659496	0.015	0.014	0.704551	1111	-2.31545	0.00462079	0.00239077	1.975	0.0977432	20	24436	2222	0.025	-1.294	0.05	-1.029	0.075	-0.874	0.1	-0.762
12	2	2112	0.0899281	0.0313704	0.587093	0.057	0.071	0.9484	1111	0.201816	0.888115	0.63466	0.123962	0.100475	20	25119	2222	0.025	-1.1175	0.05	-0.829	0.075	-0.676	0.1	-0.5715
13	2	2290	0.0184179	0.0393815	0.682048	0.0675	0.089	0.701283	1111	0.0360295	0.696681	0.478338	0.138813	0.127047	20	31762	2222	0.025	-1.368	0.05	-1.051	0.075	-0.874	0.1	-0.749
14	2	2468	0.191421	0.0416191	0.616424	0.0705	0.0955	0.803497	1111	-0.26162	0.586203	0.261755	0.204871	0.0853033	20	21326	2222	0.025	-1.2455	0.05	-0.946	0.075	-0.7785	0.1	-0.662
15	2	2646	-0.6264	0.0176419	0.622595	0.02	0.028	0.791168	1111	-0.161711	0.719148	0.361183	0.149242	0.127239	20	31810	2222	0.025	-1.2035	0.05	-0.949	0.075	-0.801	0.1	-0.6945
16	2	2824	0.826577	0.0593449	0.61654	0.0865	0.103	0.847783	1111	-0.305064	0.530877	0.217779	0.235308	0.121675	20	30419	2222	0.025	-1.202	0.05	-0.895	0.075	-0.7285	0.1	-0.614
17	2	3002	0.0416696	0.0463875	0.696797	0.086	0.1125	0.82456	1111	-0.699206	0.210053	0.0887319	0.513321	0.0855113	20	21378	2222	0.025	-1.2754	0.05	-0.9469	0.075	-0.7698	0.1	-0.6483
18	2	3180	0.169463	0.0494778	0.802305	0.0535	0.066	0.550372	1111	0.404245	0.4834	0.68535	0.240284	0.0940032	20	23501	2222	0.025	-1.552	0.05	-1.2475	0.075	-1.0635	0.1	-0.9285
19	2	3358	0.0565052	0.0440249	0.519916	0.0569	0.0699	1.0947	1111	-0.2126	0.747506	0.243567	0.164657	0.0981592	20	24540	2222	0.025	-0.942	0.05	-0.7052	0.075	-0.5763	0.1	-0.4871
20	2	3536	0.219965	0.0452672	0.391762	0.065	0.0794	1.25276	1111	-0.309958	0.545361	0.143275	0.229496	0.128859	20	32215	2222	0.025	-0.7809	0.05	-0.5864	0.075	-0.4788	0.1	-0.4037
21	2	3714	-0.327754	0.0358475	0.340677	0.0496	0.0596	1.43676	1111	0.129343	#N/A	#N/A	#N/A	0.0974512	20	24363	2222	0.025	-0.6677	0.05	-0.5058	0.075	-0.4161	0.1	-0.3531
22	2	3892	1.89664	0.0883648	0.645953	0.1095	0.133	0.69619	1111	0.893913	0.260701	0.910685	0.509639	0.124211	20	31053	2222	0.025	-1.255	0.05	-0.975	0.075	-0.812	0.1	-0.695
23	2	4070	-0.813013	0.023402	0.691795	0.042	0.075	0.649666	1111	0.0564493	0.649347	0.509691	0.147906	0.0968712	20	24218	2222	0.025	-1.4005	0.05	-1.1115	0.075	-0.941	0.1	-0.817
24	2	4248	0.0122888	0.0370568	0.652828	0.054	0.077	0.677778	1111	-0.320869	0.527557	0.267009	0.231906	0.167151	20	41788	2222	0.025	-1.3095	0.05	-1.0365	0.075	-0.8755	0.1	-0.759
25	2	4426	-0.716328	0.0244712	0.613603	0.0414	0.0588	0.817278	1111	0.146643	#N/A	#N/A	#N/A	0.142083	20	35521	2222	0.025	-1.2265	0.05	-0.9417	0.075	-0.782	0.1	-0.6698
26	2	4604	-0.447201	0.0313313	0.696538	0.0325	0.0515	0.650196	1111	0.57637	0.415803	0.807894	0.327776	0.0934593	20	23365	2222	0.025	-1.345	0.05	-1.0815	0.075	-0.923	0.1	-0.8065
27	2	4782	-0.195752	0.0342433	0.756579	0.0645	0.1005	0.63278	1111	-0.954756	0.166439	0.0812905	0.670423	0.0910113	20	22753	2222	0.025	-1.5375	0.05	-1.192	0.075	-0.9935	0.1	-0.853
28	2	4960	0.581012	0.0555537	0.489533	0.0674	0.0844	0.906326	1111	0.70951	0.297639	0.921929	0.423755	0.0941232	20	23531	2222	0.025	-0.9502	0.05	-0.7505	0.075	-0.6312	0.1	-0.544
29	2	5138	-0.995795	-0.00784756	0.941136	0.013	0.0495	0.473793	1111	0.395636	0.426519	0.676103	0.271186	0.164079	20	41020	2222	0.025	-1.936	0.05	-1.551	0.075	-1.3225	0.1	-1.156
30	2	5316	0.237365	0.0439818	0.559854	0.0549	0.0739	0.779153	1111	0.687896	0.345821	0.888791	0.400279	0.118463	20	29616	2222	0.025	-1.0965	0.05	-0.8772	0.075	-0.7449	0.1	-0.6472
31	2	5494	0.886811	0.0594439	0.779923	0.0585	0.076	0.583071	1111	0.520001	0.450193	0.748265	0.284476	0.0821713	20	20543	2222	0.025	-1.476	0.05	-1.184	0.075	-1.0075	0.1	-0.8775
32	2	5672	-0.260358	0.0255535	0.674773	0.0333	0.0539	0.657024	1111	0.27884	0.606157	0.657836	0.184975	0.133087	20	33272	2222	0.025	-1.3308	0.05	-1.0716	0.075	-0.9144	0.1	-0.7983
33	2	5850	0.419054	0.036809	0.98356	0.06	0.094	0.44049	1111	-1.32877	0.131767	0.0785069	0.91073	0.105259	20	26315	2222	0.025	-1.9795	0.05	-1.5905	0.075	-1.3565	0.1	-1.1835
34	2	6028	-0.525422	-0.00059239	1.08094	0.026	0.065	0.404791	1111	0.163299	0.402338	0.555781	0.243356	0.109355	20	27339	2222	0.025	-2.2235	0.05	-1.784	0.075	-1.522	0.1	-1.33
35	2	6206	0.710953	-0.00268388	1.70078	0.022	0.069	0.258353	1111	-1.46166	0.152808	0.177942	0.888401	0.179415	20	44854	2222	0.025	-3.448	0.05	-2.787	0.075	-2.387	0.1	-2.092
36	2	6384	0.450239	0.0284279	1.03059	0.0485	0.0805	0.42416	1111	0.198423	0.420565	0.563719	0.23443	0.143491	20	35873	2222	0.025	-2.079	0.05	-1.669	0.075	-1.4225	0.1	-1.241
37	2	6562	-0.0981836	0.0222604	0.895413	0.0445	0.082	0.485817	1111	0.0488114	0.485232	0.502368	0.196284	0.0766114	20	19153	2222	0.025	-1.8135	0.05	-1.4575	0.075	-1.243	0.1	-1.085
38	2	6740	0.369076	0.0404113	0.761322	0.055	0.0905	0.5665	1111	-0.0486027	0.554154	0.442035	0.173997	0.133631	20	33408	2222	0.025	-1.5045	0.05	-1.215	0.075	-1.039	0.1	-0.9075
39	2	6918	-0.584974	0.0084956	0.625875	0.02	0.0385	0.679586	1111	0.435025	0.527642	0.761293	0.252392	0.0699114	20	17478	2222	0.025	-1.264	0.05	-1.0275	0.075	-0.8825	0.1	-0.7745
40	2	7096	-0.649897	-0.00181029	0.868227	0.0085	0.0365	0.536493	1111	1.97005	0.0280094	0.985291	1.51958	0.0776314	20	19408	2222	0.025	-1.752	0.05	-1.3965	0.075	-1.1875	0.1	-1.036
41	2	7274	0.889074	0.0501443	0.79382	0.0715	0.104	0.54934	1111	-0.492241	0.382296	0.22687	0.336747	0.103507	20	25877	2222	0.025	-1.5855	0.05	-1.2655	0.075	-1.0735	0.1	-0.932
42	2	7452	-0.967779	-0.0107916	0.792595	0.021	0.05	0.574366	1111	1.52021	0.0584999	0.979924	1.11586	0.0728434	20	18211	2222	0.025	-1.6645	0.05	-1.3115	0.075	-1.1075	0.1	-0.961
43	2	7630	0.536434	0.0410807	0.799685	0.0645	0.096	0.54852	1111	1.61724	0.0581557	0.978977	1.15033	0.0693114	20	17328	2222	0.025	-1.6165	0.05	-1.288	0.075	-1.09	0.1	-0.946
44	2	7808	-0.474174	0.00107092	0.96177	0.0385	0.086	0.467509	1111	0.387597	0.434098	0.659933	0.262313	0.116143	20	29036	2222	0.025	-2.016	0.05	-1.5965	0.075	-1.35	0.1	-1.1725
45	2	7986	0.439124	0.0362615	0.84569	0.0705	0.114	0.523717	1111	1.77856	0.0431079	0.9845	1.28916	0.19359	20	48398	2222	0.025	-1.7435	0.05	-1.375	0.075	-1.159	0.1	-1.003
46	2	8164	0.335586	0.0332683	0.741391	0.0585	0.0985	0.595352	1111	0.476555	0.491576	0.735587	0.262529	0.106787	20	26697	2222	0.025	-1.5095	0.05	-1.2005	0.075	-1.015	0.1	-0.8805
47	2	8342	-0.0455299	0.0245903	0.748382	0.046	0.0855	0.613715	1111	-0.137646	0.573071	0.390886	0.177722	0.0882073	20	22052	2222	0.025	-1.522	0.05	-1.2015	0.075	-1.013	0.1	-0.878
48	2	8520	0.246787	0.0353473	0.590266	0.054	0.077	0.763665	1111	-0.434652	0.452447	0.188469	0.291289	0.114647	20	28662	2222	0.025	-1.192	0.05	-0.9395	0.075	-0.791	0.1	-0.6835
49	2	8698	1.96909	0.0915859	1.03305	0.121	0.172	0.436576	1111	-0.606098	0.295005	0.223118	0.434123	0.114303	20	28576	2222	0.025	-2.043	0.05	-1.609	0.075	-1.352	0.1	-1.166
50	2	8876	0.1441	0.0330244	0.655685	0.04	0.0695	0.760398	1111	-0.182396	0.662936	0.339643	0.165329	0.110455	20	27614	2222	0.025	-1.271	0.05	-0.9905	0.075	-0.83	0.1	-0.7155
51	2	9054	-0.464304	0.0126473	0.992767	0.023	0.054	0.516727	1111	-0.845804	0.244079	0.150831	0.530883	0.176351	20	44088	2222	0.025	-1.95	0.05	-1.514	0.075	-1.268	0.1	-1.095
52	2	9232	-0.123681	0.025092	1.15259	0.094	0.147	0.505713	1111	-0.347826	0.390386	0.297722	0.291439	0.123087	20	30772	2222	0.025	-2.319	0.05	-1.687	0.075	-1.359	0.1	-1.141
53	2	9410	0.288241	0.0433433	0.868067	0.073	0.106	0.591024	1111	0.274017	0.56556	0.617342	0.190695	0.152731	20	38183	2222	0.025	-1.742	0.05	-1.322	0.075	-1.089	0.1	-0.928
54	2	9430	0.240035	0.0400032	0.81285	0.097	0.125	0.742036	1111	0	0.712273	0.429818	0.141762	0.0860953	20	21524	2222	0.025	-1.578	0.05	-1.131	0.075	-0.902	0.1	-0.7495
