# Supplementary material for: Time-varying asymmetry and tail thickness in long series of daily financial returns
Source: publisher site journal article supplement (doi:10.1515/snde-2017-0071), 2018-10-02
Supplement: Supplementary file 447 [file data1_s&p500__L1_pred_H3.xlsx]

## Sheet: 1
	Var1	Var2	Var3	Var4	Var5	Var6	Var7	Var8	Var9	Var10	Var11	Var12	Var13	Var14	Var15	Var16	Var17	Var18	Var19	Var20	Var21	Var22	Var23	Var24	Var25
1	3	154	0.16389	0.0260066	2.45303	0.167	0.196	0.363894	1111	0.752287	#N/A	#N/A	#N/A	0.355593	20	88899	2222	0.025	-3.648	0.05	-2.517	0.075	-1.97	0.1	-1.619
2	3	332	0.836457	0.0902216	1.0244	0.1215	0.114	0.73022	1111	-0.0884173	0.646969	0.353619	0.170703	0.262622	20	65656	2222	0.025	-1.552	0.05	-1.0905	0.075	-0.8605	0.1	-0.7095
3	3	510	0.862251	0.0637539	0.585215	0.0905	0.119	0.926596	1111	0.0814664	0.92016	0.49227	0.106086	0.259798	20	64950	2222	0.025	-1.0595	0.05	-0.797	0.075	-0.6515	0.1	-0.55
4	3	688	-0.0815994	0.0123575	0.473674	0.042	0.063	1.28012	1111	0.734997	0.124262	0.974506	0.517569	0.234262	20	58566	2222	0.025	-0.888	0.05	-0.655	0.075	-0.531	0.1	-0.447
5	3	866	0.66556	0.0411984	0.806129	0.087	0.125	0.672527	1111	0.0826446	0.66909	0.49694	0.146863	0.20705	20	51763	2222	0.025	-1.593	0.05	-1.186	0.075	-0.966	0.1	-0.815
6	3	1044	0.226074	0.0272068	0.560321	0.0505	0.0535	1.00348	1111	-0.45062	0.389937	0.128152	0.312734	0.177247	20	44312	2222	0.025	-1.0325	0.05	-0.7695	0.075	-0.6285	0.1	-0.532
7	3	1222	0.387887	0.0597721	0.672234	0.086	0.107	0.743755	1111	0.959728	0.189239	0.935686	0.592828	0.211454	20	52864	2222	0.025	-1.3185	0.05	-0.9995	0.075	-0.822	0.1	-0.6985
8	3	1400	0.471032	0.138644	1.02118	0.183	0.239	0.60603	1111	-0.023955	0.540921	0.381255	0.192723	0.144147	20	36037	2222	0.025	-1.86	0.05	-1.336	0.075	-1.059	0.1	-0.873
9	3	1578	0.398616	0.0649001	0.694618	0.089	0.135	0.673648	1111	-0.360361	0.463653	0.235053	0.269929	0.103887	20	25972	2222	0.025	-1.368	0.05	-1.064	0.075	-0.887	0.1	-0.76
10	3	1756	-0.515687	0.053109	0.812261	0.069	0.09	0.559464	1111	0.238018	0.543528	0.594083	0.188219	0.126239	20	31560	2222	0.025	-1.6135	0.05	-1.271	0.075	-1.0695	0.1	-0.924
11	3	1934	-0.651029	0.027996	0.660346	0.029	0.03	0.720148	1111	0.677019	0.333143	0.865801	0.401559	0.0977432	20	24436	2222	0.025	-1.278	0.05	-1.007	0.075	-0.851	0.1	-0.739
12	3	2112	0.0899281	0.0314363	0.627472	0.058	0.072	0.928159	1111	-0.156933	0.762471	0.315074	0.148475	0.100475	20	25119	2222	0.025	-1.164	0.05	-0.86	0.075	-0.699	0.1	-0.5895
13	3	2290	0.0184179	0.0400887	0.704438	0.068	0.087	0.700823	1111	-0.0720721	0.666494	0.403877	0.152331	0.127047	20	31762	2222	0.025	-1.389	0.05	-1.063	0.075	-0.882	0.1	-0.754
14	3	2468	0.191421	0.0397657	0.642542	0.0695	0.0935	0.792518	1111	0.10473	0.790621	0.528195	0.125258	0.0853033	20	21326	2222	0.025	-1.294	0.05	-0.9775	0.075	-0.8025	0.1	-0.6815
15	3	2646	-0.6264	0.0301287	0.617528	0.0325	0.0435	0.81817	1111	-0.921333	0.136017	0.0496031	0.667659	0.127239	20	31810	2222	0.025	-1.1755	0.05	-0.9185	0.075	-0.771	0.1	-0.6655
16	3	2824	0.826577	0.0457417	0.650653	0.074	0.0931	0.825739	1111	0.228885	#N/A	#N/A	#N/A	0.121675	20	30419	2222	0.025	-1.2686	0.05	-0.9451	0.075	-0.7705	0.1	-0.6509
17	3	3002	0.0416696	0.0474404	0.696024	0.0871	0.1109	0.827605	1111	-0.196657	0.628727	0.287412	0.182759	0.0855113	20	21378	2222	0.025	-1.296	0.05	-0.956	0.075	-0.7743	0.1	-0.6502
18	3	3180	0.169463	0.0464599	0.80438	0.0505	0.0605	0.559406	1111	-1.21767	0.116695	0.0534222	0.872713	0.0940032	20	23501	2222	0.025	-1.563	0.05	-1.2475	0.075	-1.0605	0.1	-0.924
19	3	3358	0.0565052	0.0435501	0.54134	0.0574	0.0717	1.07334	1111	0.0425562	#N/A	#N/A	#N/A	0.0981592	20	24540	2222	0.025	-0.9809	0.05	-0.7304	0.075	-0.5955	0.1	-0.503
20	3	3536	0.219965	0.0417896	0.404625	0.0622	0.0768	1.24045	1111	-0.0388123	1.14	0.379152	0.091305	0.128859	20	32215	2222	0.025	-0.8076	0.05	-0.6036	0.075	-0.4918	0.1	-0.4144
21	3	3714	-0.327754	0.0427004	0.352743	0.0568	0.0644	1.42581	1111	0.305057	0.920406	0.808915	0.150841	0.0974512	20	24363	2222	0.025	-0.6751	0.05	-0.5079	0.075	-0.4149	0.1	-0.3505
22	3	3892	1.89664	0.0510769	0.635017	0.072	0.0955	0.723661	1111	0.268959	0.680245	0.640089	0.161204	0.124211	20	31053	2222	0.025	-1.2675	0.05	-0.986	0.075	-0.824	0.1	-0.708
23	3	4070	-0.813013	0.0414851	0.675017	0.0605	0.089	0.67924	1111	0.708545	0.349984	0.861637	0.401391	0.0968712	20	24218	2222	0.025	-1.352	0.05	-1.061	0.075	-0.8915	0.1	-0.7695
24	3	4248	0.0122888	0.0374063	0.651829	0.055	0.073	0.690917	1111	0.172904	0.679375	0.581148	0.148433	0.167151	20	41788	2222	0.025	-1.31	0.05	-1.031	0.075	-0.868	0.1	-0.75
25	3	4426	-0.716328	0.0407136	0.625312	0.0578	0.0741	0.818271	1111	-0.409041	0.456868	0.186738	0.280368	0.142083	20	35521	2222	0.025	-1.2274	0.05	-0.9338	0.075	-0.7704	0.1	-0.6566
26	3	4604	-0.447201	0.0419372	0.701355	0.0435	0.064	0.652229	1111	1.0132	0.173658	0.929746	0.650002	0.0934593	20	23365	2222	0.025	-1.347	0.05	-1.0755	0.075	-0.914	0.1	-0.796
27	3	4782	-0.195752	0.0391364	0.743079	0.069	0.1	0.656681	1111	-0.420589	0.425889	0.224016	0.293394	0.0910113	20	22753	2222	0.025	-1.5025	0.05	-1.156	0.075	-0.96	0.1	-0.821
28	3	4960	0.581012	0.0428351	0.49687	0.0558	0.0785	0.903764	1111	0.221953	0.844638	0.647596	0.131226	0.0941232	20	23531	2222	0.025	-0.9806	0.05	-0.7732	0.075	-0.6505	0.1	-0.5614
29	3	5138	-0.995795	0.0148005	0.942733	0.0365	0.065	0.478407	1111	-0.038219	0.476563	0.464398	0.203455	0.164079	20	41020	2222	0.025	-1.9225	0.05	-1.53	0.075	-1.2985	0.1	-1.13
30	3	5316	0.237365	0.0388883	0.576156	0.051	0.0743	0.765198	1111	0.741539	0.302114	0.902723	0.444197	0.118463	20	29616	2222	0.025	-1.1378	0.05	-0.909	0.075	-0.7704	0.1	-0.6688
31	3	5494	0.886811	0.0385761	0.787522	0.039	0.0585	0.582681	1111	1.27845	0.110999	0.949575	0.862961	0.0821713	20	20543	2222	0.025	-1.515	0.05	-1.215	0.075	-1.0355	0.1	-0.9025
32	3	5672	-0.260358	0.0330936	0.680731	0.042	0.0676	0.658171	1111	0.170518	0.645408	0.584602	0.156888	0.133087	20	33272	2222	0.025	-1.338	0.05	-1.0721	0.075	-0.9111	0.1	-0.7937
33	3	5850	0.419054	0.0266331	0.978709	0.0505	0.0875	0.446437	1111	-1.56806	0.0900507	0.052026	1.11459	0.105259	20	26315	2222	0.025	-1.9855	0.05	-1.5925	0.075	-1.355	0.1	-1.182
34	3	6028	-0.525422	0.0127561	1.08675	0.0405	0.0745	0.407867	1111	-1.46903	0.119326	0.0799013	0.9906	0.109355	20	27339	2222	0.025	-2.225	0.05	-1.7785	0.075	-1.5105	0.1	-1.3165
35	3	6206	0.710953	-0.0214796	1.69259	0.007	0.072	0.262099	1111	-1.88542	0.11348	0.121696	1.17658	0.179415	20	44854	2222	0.025	-3.459	0.05	-2.79	0.075	-2.387	0.1	-2.092
36	3	6384	0.450239	0.0167336	1.04754	0.0385	0.064	0.420153	1111	-0.125274	0.411265	0.431956	0.238331	0.143491	20	35873	2222	0.025	-2.1315	0.05	-1.7085	0.075	-1.455	0.1	-1.2695
37	3	6562	-0.0981836	0.0246838	0.905409	0.048	0.085	0.483335	1111	-1.53426	0.083806	0.0444506	1.10726	0.0766114	20	19153	2222	0.025	-1.8365	0.05	-1.472	0.075	-1.2515	0.1	-1.092
38	3	6740	0.369076	0.0310283	0.765101	0.0465	0.0765	0.565363	1111	0.639661	0.391193	0.80061	0.357524	0.133631	20	33408	2222	0.025	-1.523	0.05	-1.23	0.075	-1.0515	0.1	-0.918
39	3	6918	-0.584974	0.0252355	0.627606	0.037	0.0545	0.682066	1111	0.392928	0.567264	0.72949	0.223371	0.0699114	20	17478	2222	0.025	-1.2545	0.05	-1.014	0.075	-0.867	0.1	-0.758
40	3	7096	-0.649897	0.0159085	0.865001	0.0265	0.0515	0.542439	1111	-0.163549	0.513907	0.399559	0.198077	0.0776314	20	19408	2222	0.025	-1.7285	0.05	-1.371	0.075	-1.161	0.1	-1.01
41	3	7274	0.889074	0.0264636	0.800436	0.0485	0.082	0.548939	1111	0.662453	0.377977	0.801382	0.370514	0.103507	20	25877	2222	0.025	-1.6285	0.05	-1.3	0.075	-1.103	0.1	-0.96
42	3	7452	-0.967779	0.0156003	0.793187	0.0485	0.0835	0.578517	1111	0.800832	0.308358	0.860697	0.465628	0.0728434	20	18211	2222	0.025	-1.6455	0.05	-1.2895	0.075	-1.083	0.1	-0.936
43	3	7630	0.536434	0.0271357	0.807459	0.052	0.0845	0.546219	1111	0.816403	0.307315	0.851653	0.469138	0.0693114	20	17328	2222	0.025	-1.649	0.05	-1.3125	0.075	-1.113	0.1	-0.9665
44	3	7808	-0.474174	0.0137025	0.966114	0.052	0.099	0.468316	1111	-0.139362	0.446962	0.412284	0.222389	0.116143	20	29036	2222	0.025	-2.019	0.05	-1.591	0.075	-1.34	0.1	-1.1605
45	3	7986	0.439124	0.0254858	0.846397	0.0605	0.102	0.527208	1111	2.10772	0.0169661	0.993966	1.62329	0.19359	20	48398	2222	0.025	-1.7565	0.05	-1.3845	0.075	-1.168	0.1	-1.011
46	3	8164	0.335586	0.024788	0.743726	0.0505	0.0905	0.597459	1111	0.268745	0.572034	0.629135	0.188831	0.106787	20	26697	2222	0.025	-1.527	0.05	-1.211	0.075	-1.0245	0.1	-0.889
47	3	8342	-0.0455299	0.026137	0.751999	0.0485	0.0895	0.61412	1111	0.608143	0.409431	0.804805	0.339451	0.0882073	20	22052	2222	0.025	-1.532	0.05	-1.2055	0.075	-1.0155	0.1	-0.8785
48	3	8520	0.246787	0.0288885	0.596569	0.0485	0.0805	0.758695	1111	0.19945	0.73407	0.613738	0.1443	0.114647	20	28662	2222	0.025	-1.2145	0.05	-0.956	0.075	-0.804	0.1	-0.6955
49	3	8698	1.96909	0.0363819	1.03317	0.0675	0.118	0.440499	1111	-0.155085	0.416361	0.404578	0.240562	0.114303	20	28576	2222	0.025	-2.107	0.05	-1.6655	0.075	-1.406	0.1	-1.2185
50	3	8876	0.1441	0.0304814	0.664144	0.0375	0.058	0.758564	1111	0.667165	0.329962	0.871416	0.394894	0.110455	20	27614	2222	0.025	-1.287	0.05	-1.0035	0.075	-0.84	0.1	-0.7245
51	3	9054	-0.464304	0.026242	0.991274	0.037	0.066	0.521943	1111	-0.779617	0.260943	0.162598	0.495897	0.176351	20	44088	2222	0.025	-1.942	0.05	-1.499	0.075	-1.25	0.1	-1.076
52	3	9232	-0.123681	0.0295428	1.14649	0.099	0.152	0.509695	1111	-0.0680099	0.48245	0.41759	0.210589	0.123087	20	30772	2222	0.025	-2.312	0.05	-1.676	0.075	-1.348	0.1	-1.13
53	3	9410	0.288241	0.0363818	0.876461	0.067	0.1	0.592134	1111	1.04672	0.186631	0.912	0.644552	0.152731	20	38183	2222	0.025	-1.76	0.05	-1.336	0.075	-1.101	0.1	-0.938
54	3	9430	0.240035	0.0341602	0.807792	0.0925	0.1255	0.736024	1111	-0.695378	0.220254	0.114344	0.499165	0.0860953	20	21524	2222	0.025	-1.619	0.05	-1.157	0.075	-0.9215	0.1	-0.7655
