# Supplementary material for: Time-varying asymmetry and tail thickness in long series of daily financial returns
Source: publisher site journal article supplement (doi:10.1515/snde-2017-0071), 2018-10-02
Supplement: Supplementary file 449 [file data1_s&p500__L1_pred_H4.xlsx]

## Sheet: 1
	Var1	Var2	Var3	Var4	Var5	Var6	Var7	Var8	Var9	Var10	Var11	Var12	Var13	Var14	Var15	Var16	Var17	Var18	Var19	Var20	Var21	Var22	Var23	Var24	Var25
1	4	154	0.16389	0.0231388	2.37608	0.167	0.196	0.356279	1111	0.107009	#N/A	#N/A	#N/A	0.355593	20	88899	2222	0.025	-3.79	0.05	-2.603	0.075	-2.033	0.1	-1.668
2	4	332	0.836457	0.0912321	1.04934	0.122	0.1135	0.727381	1111	0.132597	#N/A	#N/A	#N/A	0.262622	20	65656	2222	0.025	-1.56	0.05	-1.0955	0.075	-0.8665	0.1	-0.7145
3	4	510	0.862251	0.0637142	0.595203	0.09	0.1137	0.91695	1111	-0.0407249	0.841084	0.384891	0.122662	0.259798	20	64950	2222	0.025	-1.0845	0.05	-0.8127	0.075	-0.6633	0.1	-0.5594
4	4	688	-0.0815994	0.013333	0.475012	0.0425	0.065	1.27898	1111	-0.0406918	1.18091	0.397452	0.0867956	0.234262	20	58566	2222	0.025	-0.896	0.05	-0.658	0.075	-0.533	0.1	-0.4475
5	4	866	0.66556	0.040724	0.828754	0.087	0.118	0.662546	1111	-0.289556	0.491941	0.276167	0.237516	0.20705	20	51763	2222	0.025	-1.624	0.05	-1.204	0.075	-0.982	0.1	-0.829
6	4	1044	0.226074	0.0273434	0.563518	0.0515	0.057	0.991606	1111	-0.0376435	0.954687	0.412954	0.106871	0.177247	20	44312	2222	0.025	-1.053	0.05	-0.7825	0.075	-0.639	0.1	-0.5405
7	4	1222	0.387887	0.0594606	0.689146	0.0855	0.104	0.734804	1111	-0.0289477	0.706011	0.417761	0.142915	0.211454	20	52864	2222	0.025	-1.344	0.05	-1.0165	0.075	-0.836	0.1	-0.7095
8	4	1400	0.471032	0.133112	1.01987	0.176	0.23	0.619835	1111	0.930017	0.268161	0.864349	0.477247	0.144147	20	36037	2222	0.025	-1.835	0.05	-1.317	0.075	-1.044	0.1	-0.86
9	4	1578	0.398616	0.0654195	0.701706	0.089	0.126	0.669594	1111	0.84585	0.279263	0.89326	0.483244	0.103887	20	25972	2222	0.025	-1.381	0.05	-1.073	0.075	-0.894	0.1	-0.767
10	4	1756	-0.515687	0.0553417	0.821576	0.07	0.0825	0.559457	1111	-0.1947	0.508999	0.357032	0.211272	0.126239	20	31560	2222	0.025	-1.6285	0.05	-1.277	0.075	-1.0715	0.1	-0.925
11	4	1934	-0.651029	0.0290547	0.659739	0.029	0.028	0.731109	1111	0	0.729097	0.47875	0.133781	0.0977432	20	24436	2222	0.025	-1.276	0.05	-1.0005	0.075	-0.843	0.1	-0.73
12	4	2112	0.0899281	0.0329979	0.640375	0.06	0.0755	0.910165	1111	-0.202134	0.694922	0.283904	0.168728	0.100475	20	25119	2222	0.025	-1.2005	0.05	-0.884	0.075	-0.718	0.1	-0.605
13	4	2290	0.0184179	0.0413201	0.709284	0.069	0.09	0.700066	1111	-0.433527	0.42585	0.203032	0.300401	0.127047	20	31762	2222	0.025	-1.406	0.05	-1.072	0.075	-0.887	0.1	-0.7575
14	4	2468	0.191421	0.0411395	0.659241	0.0705	0.0945	0.782446	1111	0.487296	0.532198	0.789372	0.254804	0.0853033	20	21326	2222	0.025	-1.3275	0.05	-0.999	0.075	-0.819	0.1	-0.6945
15	4	2646	-0.6264	0.0314323	0.616723	0.0335	0.0485	0.840752	1111	-0.692044	0.245403	0.0888557	0.473596	0.127239	20	31810	2222	0.025	-1.157	0.05	-0.8995	0.075	-0.753	0.1	-0.649
16	4	2824	0.826577	0.0447628	0.670614	0.0732	0.0913	0.807782	1111	0.532037	0.487859	0.816734	0.280537	0.121675	20	30419	2222	0.025	-1.3098	0.05	-0.9748	0.075	-0.7936	0.1	-0.6699
17	4	3002	0.0416696	0.0477448	0.769688	0.0872	0.1118	0.827932	1111	-0.366249	0.454781	0.196469	0.271525	0.0855113	20	21378	2222	0.025	-1.3127	0.05	-0.964	0.075	-0.7789	0.1	-0.6533
18	4	3180	0.169463	0.0454485	0.807597	0.049	0.058	0.565319	1111	-0.289682	0.492855	0.317624	0.233472	0.0940032	20	23501	2222	0.025	-1.5695	0.05	-1.248	0.075	-1.058	0.1	-0.9195
19	4	3358	0.0565052	0.0436282	0.561612	0.0581	0.0726	1.05701	1111	0.24081	#N/A	#N/A	#N/A	0.0981592	20	24540	2222	0.025	-1.0112	0.05	-0.751	0.075	-0.6105	0.1	-0.515
20	4	3536	0.219965	0.0417064	0.414684	0.0623	0.0787	1.22828	1111	-0.0258833	1.1484	0.39513	0.0892624	0.128859	20	32215	2222	0.025	-0.8259	0.05	-0.6145	0.075	-0.5006	0.1	-0.4217
21	4	3714	-0.327754	0.043645	0.356793	0.058	0.0677	1.41754	1111	0.245715	#N/A	#N/A	#N/A	0.0974512	20	24363	2222	0.025	-0.6876	0.05	-0.5147	0.075	-0.42	0.1	-0.3538
22	4	3892	1.89664	0.0457041	0.622316	0.0655	0.087	0.750141	1111	-0.573873	0.329143	0.13413	0.393785	0.124211	20	31053	2222	0.025	-1.244	0.05	-0.965	0.075	-0.8055	0.1	-0.692
23	4	4070	-0.813013	0.0442839	0.657886	0.0625	0.09	0.709537	1111	0.558786	0.462028	0.808975	0.300838	0.0968712	20	24218	2222	0.025	-1.312	0.05	-1.025	0.075	-0.858	0.1	-0.739
24	4	4248	0.0122888	0.0375356	0.651142	0.055	0.075	0.70287	1111	0.308015	0.635206	0.672501	0.181324	0.167151	20	41788	2222	0.025	-1.3085	0.05	-1.0235	0.075	-0.8595	0.1	-0.7415
25	4	4426	-0.716328	0.0432705	0.634313	0.061	0.0817	0.817575	1111	0.188996	0.787239	0.604004	0.134342	0.142083	20	35521	2222	0.025	-1.242	0.05	-0.9405	0.075	-0.7743	0.1	-0.6586
26	4	4604	-0.447201	0.0431512	0.70441	0.045	0.063	0.657514	1111	-1.0838	0.122631	0.0492856	0.78448	0.0934593	20	23365	2222	0.025	-1.3545	0.05	-1.0775	0.075	-0.913	0.1	-0.794
27	4	4782	-0.195752	0.040502	0.728176	0.07	0.105	0.683814	1111	-0.553461	0.339865	0.165405	0.375771	0.0910113	20	22753	2222	0.025	-1.467	0.05	-1.123	0.075	-0.929	0.1	-0.793
28	4	4960	0.581012	0.0411356	0.503591	0.0539	0.0739	0.899293	1111	-0.4444	0.437166	0.146236	0.303554	0.0941232	20	23531	2222	0.025	-0.9965	0.05	-0.7832	0.075	-0.6579	0.1	-0.5677
29	4	5138	-0.995795	0.0196335	0.944666	0.0415	0.0795	0.483033	1111	-0.267943	0.436414	0.356494	0.244761	0.164079	20	41020	2222	0.025	-1.92	0.05	-1.5225	0.075	-1.2885	0.1	-1.1195
30	4	5316	0.237365	0.0374908	0.590576	0.0502	0.0742	0.753516	1111	-0.00972148	0.742231	0.455628	0.130027	0.118463	20	29616	2222	0.025	-1.1699	0.05	-0.9317	0.075	-0.7887	0.1	-0.6848
31	4	5494	0.886811	0.035329	0.794117	0.036	0.0625	0.582917	1111	0.245882	0.555249	0.620878	0.191431	0.0821713	20	20543	2222	0.025	-1.533	0.05	-1.2275	0.075	-1.044	0.1	-0.9095
32	4	5672	-0.260358	0.0344677	0.687133	0.0435	0.071	0.658292	1111	0.536578	0.455181	0.790131	0.2982	0.133087	20	33272	2222	0.025	-1.35	0.05	-1.078	0.075	-0.9155	0.1	-0.796
33	4	5850	0.419054	0.025905	0.974046	0.05	0.091	0.453459	1111	1.21643	0.179275	0.903539	0.751075	0.105259	20	26315	2222	0.025	-1.976	0.05	-1.581	0.075	-1.344	0.1	-1.1705
34	4	6028	-0.525422	0.0152936	1.09018	0.0435	0.077	0.410613	1111	-1.81709	0.0712852	0.0468956	1.29898	0.109355	20	27339	2222	0.025	-2.2325	0.05	-1.775	0.075	-1.506	0.1	-1.312
35	4	6206	0.710953	-0.0232248	1.68295	0.003	0.05	0.266208	1111	0.0277816	0.265909	0.506826	0.361322	0.179415	20	44854	2222	0.025	-3.442	0.05	-2.769	0.075	-2.366	0.1	-2.072
36	4	6384	0.450239	0.0138409	1.06289	0.037	0.071	0.41781	1111	-0.860265	0.248946	0.184394	0.53603	0.143491	20	35873	2222	0.025	-2.168	0.05	-1.7325	0.075	-1.4735	0.1	-1.286
37	4	6562	-0.0981836	0.0248937	0.915381	0.0485	0.0875	0.481885	1111	0.346278	0.45424	0.641399	0.241304	0.0766114	20	19153	2222	0.025	-1.855	0.05	-1.4815	0.075	-1.26	0.1	-1.098
38	4	6740	0.369076	0.0292887	0.768107	0.0455	0.0815	0.566454	1111	-0.0483162	0.556004	0.447711	0.173173	0.133631	20	33408	2222	0.025	-1.534	0.05	-1.236	0.075	-1.055	0.1	-0.9215
39	4	6918	-0.584974	0.0282085	0.630282	0.0405	0.061	0.683216	1111	-0.949694	0.163419	0.0596397	0.67056	0.0699114	20	17478	2222	0.025	-1.258	0.05	-1.014	0.075	-0.8655	0.1	-0.7555
40	4	7096	-0.649897	0.0197666	0.860905	0.031	0.0675	0.550332	1111	-0.842413	0.243669	0.133456	0.538659	0.0776314	20	19408	2222	0.025	-1.717	0.05	-1.358	0.075	-1.148	0.1	-0.9965
41	4	7274	0.889074	0.0212336	0.804347	0.044	0.086	0.549748	1111	-0.210305	0.502874	0.365244	0.208809	0.103507	20	25877	2222	0.025	-1.642	0.05	-1.31	0.075	-1.1115	0.1	-0.9665
42	4	7452	-0.967779	0.0204076	0.796161	0.054	0.0935	0.581985	1111	-0.611293	0.328085	0.182172	0.397322	0.0728434	20	18211	2222	0.025	-1.647	0.05	-1.2855	0.075	-1.0785	0.1	-0.9305
43	4	7630	0.536434	0.0241659	0.813636	0.049	0.081	0.544908	1111	-0.324007	0.457681	0.30931	0.24896	0.0693114	20	17328	2222	0.025	-1.6675	0.05	-1.324	0.075	-1.1215	0.1	-0.9735
44	4	7808	-0.474174	0.0169849	0.969076	0.055	0.104	0.469506	1111	-1.10627	0.170859	0.108421	0.733084	0.116143	20	29036	2222	0.025	-2.019	0.05	-1.588	0.075	-1.338	0.1	-1.158
45	4	7986	0.439124	0.0236165	0.846139	0.0585	0.1025	0.530607	1111	0.3032	0.508311	0.628444	0.212837	0.19359	20	48398	2222	0.025	-1.7605	0.05	-1.3855	0.075	-1.166	0.1	-1.009
46	4	8164	0.335586	0.0241601	0.745883	0.05	0.0925	0.600834	1111	-0.197009	0.539512	0.357803	0.195692	0.106787	20	26697	2222	0.025	-1.5335	0.05	-1.214	0.075	-1.025	0.1	-0.888
47	4	8342	-0.0455299	0.0272458	0.755059	0.049	0.086	0.616592	1111	1.05704	0.171009	0.930534	0.677531	0.0882073	20	22052	2222	0.025	-1.537	0.05	-1.207	0.075	-1.0145	0.1	-0.876
48	4	8520	0.246787	0.0284436	0.602895	0.0485	0.085	0.757264	1111	0.00603774	0.747652	0.468424	0.128931	0.114647	20	28662	2222	0.025	-1.2295	0.05	-0.966	0.075	-0.812	0.1	-0.7015
49	4	8698	1.96909	0.027528	1.03465	0.058	0.113	0.44189	1111	-0.00596961	0.437435	0.472041	0.220057	0.114303	20	28576	2222	0.025	-2.117	0.05	-1.673	0.075	-1.413	0.1	-1.225
50	4	8876	0.1441	0.0298188	0.667955	0.037	0.064	0.756283	1111	1.51076	0.0357235	0.983503	1.14873	0.110455	20	27614	2222	0.025	-1.3	0.05	-1.011	0.075	-0.847	0.1	-0.729
51	4	9054	-0.464304	0.0284794	0.988801	0.04	0.07	0.524742	1111	0.973575	0.218121	0.874833	0.588143	0.176351	20	44088	2222	0.025	-1.936	0.05	-1.492	0.075	-1.243	0.1	-1.069
52	4	9232	-0.123681	0.0286233	1.15705	0.098	0.149	0.51537	1111	0.703363	0.35997	0.780112	0.375456	0.123087	20	30772	2222	0.025	-2.314	0.05	-1.676	0.075	-1.345	0.1	-1.126
53	4	9410	0.288241	0.0353728	0.876894	0.066	0.1	0.591907	1111	0.0225635	0.585902	0.474949	0.168257	0.152731	20	38183	2222	0.025	-1.77	0.05	-1.341	0.075	-1.105	0.1	-0.941
54	4	9430	0.240035	0.0334999	0.838186	0.092	0.123	0.731329	1111	-1.05869	0.102031	0.0601842	0.80025	0.0860953	20	21524	2222	0.025	-1.639	0.05	-1.171	0.075	-0.933	0.1	-0.774
