# Supplementary material for: Time-varying asymmetry and tail thickness in long series of daily financial returns
Source: publisher site journal article supplement (doi:10.1515/snde-2017-0071), 2018-10-02
Supplement: Supplementary file 451 [file data1_s&p500__L1_pred_H5.xlsx]

## Sheet: 1
	Var1	Var2	Var3	Var4	Var5	Var6	Var7	Var8	Var9	Var10	Var11	Var12	Var13	Var14	Var15	Var16	Var17	Var18	Var19	Var20	Var21	Var22	Var23	Var24	Var25
1	5	154	0.16389	0.020916	2.73934	0.169	0.201	0.350229	1111	-0.107009	0.325748	0.406463	0.322471	0.355593	20	88899	2222	0.025	-3.905	0.05	-2.677	0.075	-2.084	0.1	-1.707
2	5	332	0.836457	0.0914478	1.01684	0.1225	0.1135	0.72715	1111	-0.57586	0.266602	0.132771	0.437988	0.262622	20	65656	2222	0.025	-1.5755	0.05	-1.1035	0.075	-0.87	0.1	-0.717
3	5	510	0.862251	0.0640368	0.612556	0.0905	0.113	0.909174	1111	0.244101	0.854934	0.637559	0.130169	0.259798	20	64950	2222	0.025	-1.1095	0.05	-0.828	0.075	-0.675	0.1	-0.569
4	5	688	-0.0815994	0.0138591	0.476897	0.043	0.066	1.2801	1111	-0.0814332	1.1007	0.350611	0.0973	0.234262	20	58566	2222	0.025	-0.903	0.05	-0.6625	0.075	-0.535	0.1	-0.449
5	5	866	0.66556	0.0406286	0.833643	0.087	0.121	0.656559	1111	0	0.638435	0.443862	0.155613	0.20705	20	51763	2222	0.025	-1.647	0.05	-1.223	0.075	-0.994	0.1	-0.838
6	5	1044	0.226074	0.0274904	0.575414	0.052	0.0545	0.980408	1111	0.225649	0.880768	0.664646	0.129373	0.177247	20	44312	2222	0.025	-1.0685	0.05	-0.793	0.075	-0.647	0.1	-0.547
7	5	1222	0.387887	0.0609298	0.696921	0.087	0.105	0.726512	1111	-0.872352	0.15687	0.0705319	0.645598	0.211454	20	52864	2222	0.025	-1.362	0.05	-1.029	0.075	-0.8445	0.1	-0.7165
8	5	1400	0.471032	0.130992	1.00644	0.173	0.229	0.628174	1111	0.189708	0.625038	0.511481	0.162794	0.144147	20	36037	2222	0.025	-1.816	0.05	-1.302	0.075	-1.032	0.1	-0.85
9	5	1578	0.398616	0.0653991	0.726487	0.09	0.127	0.668493	1111	1.04735	0.171594	0.937243	0.650801	0.103887	20	25972	2222	0.025	-1.39	0.05	-1.079	0.075	-0.898	0.1	-0.769
10	5	1756	-0.515687	0.0557913	0.828422	0.071	0.0835	0.559489	1111	-0.695353	0.28529	0.155387	0.465706	0.126239	20	31560	2222	0.025	-1.6445	0.05	-1.286	0.075	-1.0775	0.1	-0.929
11	5	1934	-0.651029	0.029429	0.67765	0.029	0.0265	0.741445	1111	-0.958511	0.140313	0.0552415	0.683307	0.0977432	20	24436	2222	0.025	-1.2735	0.05	-0.9965	0.075	-0.8375	0.1	-0.7245
12	5	2112	0.0899281	0.0338167	0.668236	0.061	0.076	0.896719	1111	0.0224795	0.886006	0.466023	0.112553	0.100475	20	25119	2222	0.025	-1.229	0.05	-0.903	0.075	-0.7315	0.1	-0.616
13	5	2290	0.0184179	0.0423897	0.726578	0.0695	0.092	0.698596	1111	0.180865	0.687093	0.577678	0.148749	0.127047	20	31762	2222	0.025	-1.419	0.05	-1.0795	0.075	-0.8925	0.1	-0.762
14	5	2468	0.191421	0.0420989	0.675718	0.0715	0.095	0.77378	1111	-0.173762	0.644353	0.322865	0.172783	0.0853033	20	21326	2222	0.025	-1.355	0.05	-1.0165	0.075	-0.832	0.1	-0.705
15	5	2646	-0.6264	0.0306123	0.603003	0.032	0.042	0.858195	1111	-0.991744	0.101668	0.0375514	0.740152	0.127239	20	31810	2222	0.025	-1.1445	0.05	-0.887	0.075	-0.741	0.1	-0.6375
16	5	2824	0.826577	0.0458274	0.695726	0.074	0.09	0.793125	1111	0.860448	#N/A	#N/A	#N/A	0.121675	20	30419	2222	0.025	-1.345	0.05	-0.9965	0.075	-0.81	0.1	-0.683
17	5	3002	0.0416696	0.0484203	0.74638	0.0871	0.1097	0.82557	1111	0.0705368	#N/A	#N/A	#N/A	0.0855113	20	21378	2222	0.025	-1.3241	0.05	-0.9703	0.075	-0.7836	0.1	-0.6568
18	5	3180	0.169463	0.0456375	0.809355	0.0495	0.066	0.570196	1111	0.510639	0.441623	0.742673	0.286431	0.0940032	20	23501	2222	0.025	-1.5715	0.05	-1.2465	0.075	-1.055	0.1	-0.916
19	5	3358	0.0565052	0.0439602	0.590527	0.0587	0.074	1.04144	1111	-0.21245	0.720099	0.2532	0.167572	0.0981592	20	24540	2222	0.025	-1.0359	0.05	-0.7675	0.075	-0.623	0.1	-0.5251
20	5	3536	0.219965	0.0414681	0.425648	0.0621	0.0742	1.21627	1111	0.32306	0.851607	0.784643	0.159804	0.128859	20	32215	2222	0.025	-0.8436	0.05	-0.6273	0.075	-0.5091	0.1	-0.4282
21	5	3714	-0.327754	0.0441167	0.363287	0.0586	0.0669	1.41011	1111	0.0817709	1.40579	0.533043	0.0703952	0.0974512	20	24363	2222	0.025	-0.6989	0.05	-0.5215	0.075	-0.4246	0.1	-0.3574
22	5	3892	1.89664	0.0438338	0.613035	0.0635	0.0825	0.775944	1111	0.538832	0.484083	0.819355	0.288853	0.124211	20	31053	2222	0.025	-1.225	0.05	-0.9455	0.075	-0.7865	0.1	-0.674
23	5	4070	-0.813013	0.0443482	0.642941	0.062	0.0875	0.736955	1111	0.611079	0.414822	0.840533	0.336346	0.0968712	20	24218	2222	0.025	-1.281	0.05	-0.9935	0.075	-0.829	0.1	-0.7125
24	5	4248	0.0122888	0.0366903	0.649395	0.0545	0.0705	0.716258	1111	-0.592229	0.330561	0.140744	0.396266	0.167151	20	41788	2222	0.025	-1.3065	0.05	-1.0175	0.075	-0.853	0.1	-0.735
25	5	4426	-0.716328	0.0442499	0.644535	0.0615	0.0775	0.816906	1111	0.0734022	#N/A	#N/A	#N/A	0.142083	20	35521	2222	0.025	-1.2538	0.05	-0.9473	0.075	-0.7782	0.1	-0.6608
26	5	4604	-0.447201	0.0425011	0.707903	0.0445	0.0545	0.660464	1111	0.483141	0.485265	0.763118	0.268041	0.0934593	20	23365	2222	0.025	-1.36	0.05	-1.0805	0.075	-0.9145	0.1	-0.7945
27	5	4782	-0.195752	0.0403735	0.715015	0.0685	0.0995	0.710701	1111	-0.100959	0.652653	0.384051	0.158586	0.0910113	20	22753	2222	0.025	-1.437	0.05	-1.094	0.075	-0.902	0.1	-0.769
28	5	4960	0.581012	0.0410691	0.509182	0.0541	0.0756	0.897458	1111	-0.0708825	0.842305	0.391013	0.121212	0.0941232	20	23531	2222	0.025	-1.0078	0.05	-0.7905	0.075	-0.6632	0.1	-0.5719
29	5	5138	-0.995795	0.0198873	0.946742	0.042	0.079	0.487429	1111	0.102158	0.486565	0.52962	0.20019	0.164079	20	41020	2222	0.025	-1.9245	0.05	-1.5205	0.075	-1.284	0.1	-1.114
30	5	5316	0.237365	0.0370825	0.604429	0.0499	0.0744	0.740907	1111	0.658917	0.370727	0.867062	0.378269	0.118463	20	29616	2222	0.025	-1.1989	0.05	-0.9524	0.075	-0.8066	0.1	-0.6994
31	5	5494	0.886811	0.0339932	0.798276	0.0355	0.061	0.583604	1111	-0.6109	0.346571	0.183852	0.387608	0.0821713	20	20543	2222	0.025	-1.5475	0.05	-1.2355	0.075	-1.0495	0.1	-0.9145
32	5	5672	-0.260358	0.0348828	0.691639	0.0436	0.0672	0.658367	1111	-0.0356824	0.646991	0.448605	0.150516	0.133087	20	33272	2222	0.025	-1.3618	0.05	-1.0828	0.075	-0.918	0.1	-0.7979
33	5	5850	0.419054	0.0253037	0.968833	0.05	0.089	0.460245	1111	0.0571048	0.459443	0.503946	0.208551	0.105259	20	26315	2222	0.025	-1.969	0.05	-1.5675	0.075	-1.3305	0.1	-1.159
34	5	6028	-0.525422	0.0156237	1.09306	0.044	0.0805	0.412542	1111	-0.761667	0.270599	0.212127	0.48071	0.109355	20	27339	2222	0.025	-2.2375	0.05	-1.7765	0.075	-1.5045	0.1	-1.309
35	5	6206	0.710953	-0.0236102	1.67531	0.005	0.065	0.269647	1111	1.844	0.116286	0.886509	1.16344	0.179415	20	44854	2222	0.025	-3.435	0.05	-2.751	0.075	-2.347	0.1	-2.053
36	5	6384	0.450239	0.0142753	1.07789	0.0375	0.0635	0.414945	1111	0.136878	0.413437	0.541595	0.235542	0.143491	20	35873	2222	0.025	-2.1985	0.05	-1.754	0.075	-1.49	0.1	-1.2985
37	5	6562	-0.0981836	0.0252562	0.922743	0.049	0.0845	0.481178	1111	0.747814	0.329778	0.80006	0.422206	0.0766114	20	19153	2222	0.025	-1.8725	0.05	-1.4935	0.075	-1.2675	0.1	-1.1035
38	5	6740	0.369076	0.0286848	0.77113	0.0445	0.085	0.567732	1111	-0.717822	0.295733	0.151602	0.461575	0.133631	20	33408	2222	0.025	-1.54	0.05	-1.239	0.075	-1.0565	0.1	-0.922
39	5	6918	-0.584974	0.0288052	0.631822	0.041	0.061	0.683954	1111	0.0507434	0.682648	0.506809	0.139033	0.0699114	20	17478	2222	0.025	-1.2615	0.05	-1.0145	0.075	-0.865	0.1	-0.755
40	5	7096	-0.649897	0.0203724	0.857733	0.031	0.064	0.554749	1111	0.175231	0.54482	0.579959	0.187134	0.0776314	20	19408	2222	0.025	-1.7105	0.05	-1.349	0.075	-1.1395	0.1	-0.989
41	5	7274	0.889074	0.0203973	0.808798	0.0435	0.085	0.550459	1111	-0.341434	0.455728	0.302552	0.252592	0.103507	20	25877	2222	0.025	-1.6525	0.05	-1.3145	0.075	-1.1155	0.1	-0.971
42	5	7452	-0.967779	0.0215336	0.798679	0.0545	0.0905	0.583598	1111	-0.642275	0.311883	0.170922	0.418147	0.0728434	20	18211	2222	0.025	-1.6505	0.05	-1.2855	0.075	-1.0755	0.1	-0.9265
43	5	7630	0.536434	0.0234582	0.820576	0.0485	0.0805	0.544107	1111	0.437599	0.472797	0.702857	0.257227	0.0693114	20	17328	2222	0.025	-1.682	0.05	-1.3345	0.075	-1.1295	0.1	-0.9805
44	5	7808	-0.474174	0.0166418	0.972226	0.055	0.101	0.471532	1111	0.492323	0.414273	0.698379	0.293231	0.116143	20	29036	2222	0.025	-2.029	0.05	-1.592	0.075	-1.339	0.1	-1.157
45	5	7986	0.439124	0.0234383	0.845953	0.058	0.1025	0.535004	1111	0.38168	0.490716	0.669165	0.235725	0.19359	20	48398	2222	0.025	-1.7605	0.05	-1.383	0.075	-1.1635	0.1	-1.005
46	5	8164	0.335586	0.0240672	0.746708	0.05	0.0905	0.603833	1111	0.74124	0.336367	0.851564	0.42549	0.106787	20	26697	2222	0.025	-1.533	0.05	-1.212	0.075	-1.023	0.1	-0.886
47	5	8342	-0.0455299	0.0274835	0.756998	0.0495	0.082	0.618626	1111	-1.29855	0.0864171	0.0412826	0.958177	0.0882073	20	22052	2222	0.025	-1.5415	0.05	-1.208	0.075	-1.0145	0.1	-0.8755
48	5	8520	0.246787	0.0275741	0.609017	0.0475	0.0755	0.753545	1111	-0.423524	0.46274	0.200381	0.280596	0.114647	20	28662	2222	0.025	-1.2435	0.05	-0.9755	0.075	-0.8195	0.1	-0.707
49	5	8698	1.96909	0.0253137	1.03549	0.056	0.11	0.443507	1111	-0.0477698	0.435482	0.454665	0.222249	0.114303	20	28576	2222	0.025	-2.118	0.05	-1.672	0.075	-1.411	0.1	-1.223
50	5	8876	0.1441	0.0295214	0.673053	0.0375	0.0645	0.754197	1111	-0.0703939	0.72295	0.420727	0.139333	0.110455	20	27614	2222	0.025	-1.3125	0.05	-1.0195	0.075	-0.8515	0.1	-0.733
51	5	9054	-0.464304	0.0279073	0.99338	0.04	0.067	0.528559	1111	0.608521	0.3717	0.769649	0.34988	0.176351	20	44088	2222	0.025	-1.937	0.05	-1.489	0.075	-1.24	0.1	-1.066
52	5	9232	-0.123681	0.0301898	1.17704	0.098	0.145	0.521259	1111	0.572585	0.416407	0.731231	0.307732	0.123087	20	30772	2222	0.025	-2.301	0.05	-1.661	0.075	-1.332	0.1	-1.114
53	5	9410	0.288241	0.0351428	0.881841	0.066	0.098	0.592394	1111	-0.439291	0.399137	0.240001	0.306953	0.152731	20	38183	2222	0.025	-1.78	0.05	-1.344	0.075	-1.107	0.1	-0.942
54	5	9430	0.240035	0.0338225	0.843572	0.093	0.126	0.725007	1111	0.164849	0.720803	0.552417	0.142463	0.0860953	20	21524	2222	0.025	-1.658	0.05	-1.185	0.075	-0.942	0.1	-0.783
