# Supplementary material for: Time-varying asymmetry and tail thickness in long series of daily financial returns
Source: publisher site journal article supplement (doi:10.1515/snde-2017-0071), 2018-10-02
Supplement: Supplementary file 453 [file data1_s&p500__Tpar_expect_alpha (t).xlsx]

## Sheet: 1
	T	alpha (t)	Var3	Var4	Var5	Var6	Var7	Var8	Var9	Var10	Var11	Var12	Var13	Var14	Var15	Var16	Var17	Var18	Var19	Var20	Var21	Var22	Var23	Var24	Var25
1	154	0.500239	0.500239	0	0	0	0	0	0	0	0	0	0	0	0	0	0	0	0	0	0	0	0	0	0
2	332	0.483395	0.483395	0.483395	0.483395	0	0	0	0	0	0	0	0	0	0	0	0	0	0	0	0	0	0	0	0
3	510	0.526088	0.526088	0.526088	0.526088	0.526088	0.526088	0	0	0	0	0	0	0	0	0	0	0	0	0	0	0	0	0	0
4	688	0.527781	0.527781	0.527781	0.527781	0.527781	0.527781	0.527781	0	0	0	0	0	0	0	0	0	0	0	0	0	0	0	0	0
5	866	0.522078	0.522078	0.522078	0.522078	0.522078	0.522078	0.522078	0.522078	0.522078	0	0	0	0	0	0	0	0	0	0	0	0	0	0	0
6	1044	0.491221	0.491221	0.491221	0.491221	0.491221	0.491221	0.491221	0.491221	0.491221	0.491221	0.491221	0	0	0	0	0	0	0	0	0	0	0	0	0
7	1222	0.511587	0.511587	0.511587	0.511587	0.511587	0.511587	0.511587	0.511587	0.511587	0.511587	0.511587	0.511587	0.511587	0	0	0	0	0	0	0	0	0	0	0
8	1400	0.547017	0.547017	0.547017	0.547017	0.547017	0.547017	0.547017	0.547017	0.547017	0.547017	0.547017	0.547017	0.547017	0.547017	0.547017	0	0	0	0	0	0	0	0	0
9	1578	0.532319	0.532319	0.532319	0.532319	0.532319	0.532319	0.532319	0.532319	0.532319	0.532319	0.532319	0.532319	0.532319	0.532319	0.532319	0.532319	0	0	0	0	0	0	0	0
10	1756	0.509677	0.509677	0.509677	0.509677	0.509677	0.509677	0.509677	0.509677	0.509677	0.509677	0.509677	0.509677	0.509677	0.509677	0.509677	0.509677	0.509677	0.509677	0	0	0	0	0	0
11	1934	0.493769	0.493769	0.493769	0.493769	0.493769	0.493769	0.493769	0.493769	0.493769	0.493769	0.493769	0.493769	0.493769	0.493769	0.493769	0.493769	0.493769	0.493769	0.493769	0.493769	0	0	0	0
12	2112	0.501106	0.501106	0.501106	0.501106	0.501106	0.501106	0.501106	0.501106	0.501106	0.501106	0.501106	0.501106	0.501106	0.501106	0.501106	0.501106	0.501106	0.501106	0.501106	0.501106	0.501106	0.501106	0	0
13	2290	0.507141	0.507141	0.507141	0.507141	0.507141	0.507141	0.507141	0.507141	0.507141	0.507141	0.507141	0.507141	0.507141	0.507141	0.507141	0.507141	0.507141	0.507141	0.507141	0.507141	0.507141	0.507141	0.507141	0
14	2468	0.511635	0.511635	0.511635	0.511635	0.511635	0.511635	0.511635	0.511635	0.511635	0.511635	0.511635	0.511635	0.511635	0.511635	0.511635	0.511635	0.511635	0.511635	0.511635	0.511635	0.511635	0.511635	0.511635	0.511635
15	2646	0.509387	0.509387	0.509387	0.509387	0.509387	0.509387	0.509387	0.509387	0.509387	0.509387	0.509387	0.509387	0.509387	0.509387	0.509387	0.509387	0.509387	0.509387	0.509387	0.509387	0.509387	0.509387	0.509387	0.509387
16	2824	0.508182	0.508182	0.508182	0.508182	0.508182	0.508182	0.508182	0.508182	0.508182	0.508182	0.508182	0.508182	0.508182	0.508182	0.508182	0.508182	0.508182	0.508182	0.508182	0.508182	0.508182	0.508182	0.508182	0.508182
17	3002	0.504433	0.504433	0.504433	0.504433	0.504433	0.504433	0.504433	0.504433	0.504433	0.504433	0.504433	0.504433	0.504433	0.504433	0.504433	0.504433	0.504433	0.504433	0.504433	0.504433	0.504433	0.504433	0.504433	0.504433
18	3180	0.500964	0.500964	0.500964	0.500964	0.500964	0.500964	0.500964	0.500964	0.500964	0.500964	0.500964	0.500964	0.500964	0.500964	0.500964	0.500964	0.500964	0.500964	0.500964	0.500964	0.500964	0.500964	0.500964	0.500964
19	3358	0.50907	0.50907	0.50907	0.50907	0.50907	0.50907	0.50907	0.50907	0.50907	0.50907	0.50907	0.50907	0.50907	0.50907	0.50907	0.50907	0.50907	0.50907	0.50907	0.50907	0.50907	0.50907	0.50907	0.50907
20	3536	0.509604	0.509604	0.509604	0.509604	0.509604	0.509604	0.509604	0.509604	0.509604	0.509604	0.509604	0.509604	0.509604	0.509604	0.509604	0.509604	0.509604	0.509604	0.509604	0.509604	0.509604	0.509604	0.509604	0.509604
21	3714	0.503588	0.503588	0.503588	0.503588	0.503588	0.503588	0.503588	0.503588	0.503588	0.503588	0.503588	0.503588	0.503588	0.503588	0.503588	0.503588	0.503588	0.503588	0.503588	0.503588	0.503588	0.503588	0.503588	0.503588
22	3892	0.510224	0.510224	0.510224	0.510224	0.510224	0.510224	0.510224	0.510224	0.510224	0.510224	0.510224	0.510224	0.510224	0.510224	0.510224	0.510224	0.510224	0.510224	0.510224	0.510224	0.510224	0.510224	0.510224	0.510224
23	4070	0.515182	0.515182	0.515182	0.515182	0.515182	0.515182	0.515182	0.515182	0.515182	0.515182	0.515182	0.515182	0.515182	0.515182	0.515182	0.515182	0.515182	0.515182	0.515182	0.515182	0.515182	0.515182	0.515182	0.515182
24	4248	0.508759	0.508759	0.508759	0.508759	0.508759	0.508759	0.508759	0.508759	0.508759	0.508759	0.508759	0.508759	0.508759	0.508759	0.508759	0.508759	0.508759	0.508759	0.508759	0.508759	0.508759	0.508759	0.508759	0.508759
25	4426	0.509805	0.509805	0.509805	0.509805	0.509805	0.509805	0.509805	0.509805	0.509805	0.509805	0.509805	0.509805	0.509805	0.509805	0.509805	0.509805	0.509805	0.509805	0.509805	0.509805	0.509805	0.509805	0.509805	0.509805
26	4604	0.511174	0.511174	0.511174	0.511174	0.511174	0.511174	0.511174	0.511174	0.511174	0.511174	0.511174	0.511174	0.511174	0.511174	0.511174	0.511174	0.511174	0.511174	0.511174	0.511174	0.511174	0.511174	0.511174	0.511174
27	4782	0.516702	0.516702	0.516702	0.516702	0.516702	0.516702	0.516702	0.516702	0.516702	0.516702	0.516702	0.516702	0.516702	0.516702	0.516702	0.516702	0.516702	0.516702	0.516702	0.516702	0.516702	0.516702	0.516702	0.516702
28	4960	0.514123	0.514123	0.514123	0.514123	0.514123	0.514123	0.514123	0.514123	0.514123	0.514123	0.514123	0.514123	0.514123	0.514123	0.514123	0.514123	0.514123	0.514123	0.514123	0.514123	0.514123	0.514123	0.514123	0.514123
29	5138	0.512835	0.512835	0.512835	0.512835	0.512835	0.512835	0.512835	0.512835	0.512835	0.512835	0.512835	0.512835	0.512835	0.512835	0.512835	0.512835	0.512835	0.512835	0.512835	0.512835	0.512835	0.512835	0.512835	0.512835
30	5316	0.516075	0.516075	0.516075	0.516075	0.516075	0.516075	0.516075	0.516075	0.516075	0.516075	0.516075	0.516075	0.516075	0.516075	0.516075	0.516075	0.516075	0.516075	0.516075	0.516075	0.516075	0.516075	0.516075	0.516075
31	5494	0.51469	0.51469	0.51469	0.51469	0.51469	0.51469	0.51469	0.51469	0.51469	0.51469	0.51469	0.51469	0.51469	0.51469	0.51469	0.51469	0.51469	0.51469	0.51469	0.51469	0.51469	0.51469	0.51469	0.51469
32	5672	0.514611	0.514611	0.514611	0.514611	0.514611	0.514611	0.514611	0.514611	0.514611	0.514611	0.514611	0.514611	0.514611	0.514611	0.514611	0.514611	0.514611	0.514611	0.514611	0.514611	0.514611	0.514611	0.514611	0.514611
33	5850	0.514816	0.514816	0.514816	0.514816	0.514816	0.514816	0.514816	0.514816	0.514816	0.514816	0.514816	0.514816	0.514816	0.514816	0.514816	0.514816	0.514816	0.514816	0.514816	0.514816	0.514816	0.514816	0.514816	0.514816
34	6028	0.508887	0.508887	0.508887	0.508887	0.508887	0.508887	0.508887	0.508887	0.508887	0.508887	0.508887	0.508887	0.508887	0.508887	0.508887	0.508887	0.508887	0.508887	0.508887	0.508887	0.508887	0.508887	0.508887	0.508887
35	6206	0.511369	0.511369	0.511369	0.511369	0.511369	0.511369	0.511369	0.511369	0.511369	0.511369	0.511369	0.511369	0.511369	0.511369	0.511369	0.511369	0.511369	0.511369	0.511369	0.511369	0.511369	0.511369	0.511369	0.511369
36	6384	0.509821	0.509821	0.509821	0.509821	0.509821	0.509821	0.509821	0.509821	0.509821	0.509821	0.509821	0.509821	0.509821	0.509821	0.509821	0.509821	0.509821	0.509821	0.509821	0.509821	0.509821	0.509821	0.509821	0.509821
37	6562	0.512887	0.512887	0.512887	0.512887	0.512887	0.512887	0.512887	0.512887	0.512887	0.512887	0.512887	0.512887	0.512887	0.512887	0.512887	0.512887	0.512887	0.512887	0.512887	0.512887	0.512887	0.512887	0.512887	0.512887
38	6740	0.519845	0.519845	0.519845	0.519845	0.519845	0.519845	0.519845	0.519845	0.519845	0.519845	0.519845	0.519845	0.519845	0.519845	0.519845	0.519845	0.519845	0.519845	0.519845	0.519845	0.519845	0.519845	0.519845	0.519845
39	6918	0.513039	0.513039	0.513039	0.513039	0.513039	0.513039	0.513039	0.513039	0.513039	0.513039	0.513039	0.513039	0.513039	0.513039	0.513039	0.513039	0.513039	0.513039	0.513039	0.513039	0.513039	0.513039	0.513039	0.513039
40	7096	0.519026	0.519026	0.519026	0.519026	0.519026	0.519026	0.519026	0.519026	0.519026	0.519026	0.519026	0.519026	0.519026	0.519026	0.519026	0.519026	0.519026	0.519026	0.519026	0.519026	0.519026	0.519026	0.519026	0.519026
41	7274	0.515989	0.515989	0.515989	0.515989	0.515989	0.515989	0.515989	0.515989	0.515989	0.515989	0.515989	0.515989	0.515989	0.515989	0.515989	0.515989	0.515989	0.515989	0.515989	0.515989	0.515989	0.515989	0.515989	0.515989
42	7452	0.511216	0.511216	0.511216	0.511216	0.511216	0.511216	0.511216	0.511216	0.511216	0.511216	0.511216	0.511216	0.511216	0.511216	0.511216	0.511216	0.511216	0.511216	0.511216	0.511216	0.511216	0.511216	0.511216	0.511216
43	7630	0.515085	0.515085	0.515085	0.515085	0.515085	0.515085	0.515085	0.515085	0.515085	0.515085	0.515085	0.515085	0.515085	0.515085	0.515085	0.515085	0.515085	0.515085	0.515085	0.515085	0.515085	0.515085	0.515085	0.515085
44	7808	0.521078	0.521078	0.521078	0.521078	0.521078	0.521078	0.521078	0.521078	0.521078	0.521078	0.521078	0.521078	0.521078	0.521078	0.521078	0.521078	0.521078	0.521078	0.521078	0.521078	0.521078	0.521078	0.521078	0.521078
45	7986	0.520806	0.520806	0.520806	0.520806	0.520806	0.520806	0.520806	0.520806	0.520806	0.520806	0.520806	0.520806	0.520806	0.520806	0.520806	0.520806	0.520806	0.520806	0.520806	0.520806	0.520806	0.520806	0.520806	0.520806
46	8164	0.523234	0.523234	0.523234	0.523234	0.523234	0.523234	0.523234	0.523234	0.523234	0.523234	0.523234	0.523234	0.523234	0.523234	0.523234	0.523234	0.523234	0.523234	0.523234	0.523234	0.523234	0.523234	0.523234	0.523234
47	8342	0.523664	0.523664	0.523664	0.523664	0.523664	0.523664	0.523664	0.523664	0.523664	0.523664	0.523664	0.523664	0.523664	0.523664	0.523664	0.523664	0.523664	0.523664	0.523664	0.523664	0.523664	0.523664	0.523664	0.523664
48	8520	0.522547	0.522547	0.522547	0.522547	0.522547	0.522547	0.522547	0.522547	0.522547	0.522547	0.522547	0.522547	0.522547	0.522547	0.522547	0.522547	0.522547	0.522547	0.522547	0.522547	0.522547	0.522547	0.522547	0.522547
49	8698	0.525101	0.525101	0.525101	0.525101	0.525101	0.525101	0.525101	0.525101	0.525101	0.525101	0.525101	0.525101	0.525101	0.525101	0.525101	0.525101	0.525101	0.525101	0.525101	0.525101	0.525101	0.525101	0.525101	0.525101
50	8876	0.525047	0.525047	0.525047	0.525047	0.525047	0.525047	0.525047	0.525047	0.525047	0.525047	0.525047	0.525047	0.525047	0.525047	0.525047	0.525047	0.525047	0.525047	0.525047	0.525047	0.525047	0.525047	0.525047	0.525047
51	9054	0.518172	0.518172	0.518172	0.518172	0.518172	0.518172	0.518172	0.518172	0.518172	0.518172	0.518172	0.518172	0.518172	0.518172	0.518172	0.518172	0.518172	0.518172	0.518172	0.518172	0.518172	0.518172	0.518172	0.518172
52	9232	0.519485	0.519485	0.519485	0.519485	0.519485	0.519485	0.519485	0.519485	0.519485	0.519485	0.519485	0.519485	0.519485	0.519485	0.519485	0.519485	0.519485	0.519485	0.519485	0.519485	0.519485	0.519485	0.519485	0.519485
53	9410	0.519697	0.519697	0.519697	0.519697	0.519697	0.519697	0.519697	0.519697	0.519697	0.519697	0.519697	0.519697	0.519697	0.519697	0.519697	0.519697	0.519697	0.519697	0.519697	0.519697	0.519697	0.519697	0.519697	0.519697
54	9430	0.516187	0.516187	0.516187	0.516187	0.516187	0.516187	0.516187	0.516187	0.516187	0.516187	0.516187	0.516187	0.516187	0.516187	0.516187	0.516187	0.516187	0.516187	0.516187	0.516187	0.516187	0.516187	0.516187	0.516187
55	8528	0.523863	0.523863	0.523863	0.523863	0.523863	0.523863	0.523863	0.523863	0.523863	0.523863	0.523863	0.523863	0.523863	0.523863	0.523863	0.523863	0.523863	0.523863	0.523863	0.523863	0.523863	0.523863	0.523863	0.523863
56	8576	0.524487	0.524487	0.524487	0.524487	0.524487	0.524487	0.524487	0.524487	0.524487	0.524487	0.524487	0.524487	0.524487	0.524487	0.524487	0.524487	0.524487	0.524487	0.524487	0.524487	0.524487	0.524487	0.524487	0.524487
57	8624	0.522953	0.522953	0.522953	0.522953	0.522953	0.522953	0.522953	0.522953	0.522953	0.522953	0.522953	0.522953	0.522953	0.522953	0.522953	0.522953	0.522953	0.522953	0.522953	0.522953	0.522953	0.522953	0.522953	0.522953
58	8672	0.523149	0.523149	0.523149	0.523149	0.523149	0.523149	0.523149	0.523149	0.523149	0.523149	0.523149	0.523149	0.523149	0.523149	0.523149	0.523149	0.523149	0.523149	0.523149	0.523149	0.523149	0.523149	0.523149	0.523149
59	8720	0.521788	0.521788	0.521788	0.521788	0.521788	0.521788	0.521788	0.521788	0.521788	0.521788	0.521788	0.521788	0.521788	0.521788	0.521788	0.521788	0.521788	0.521788	0.521788	0.521788	0.521788	0.521788	0.521788	0.521788
60	8768	0.521963	0.521963	0.521963	0.521963	0.521963	0.521963	0.521963	0.521963	0.521963	0.521963	0.521963	0.521963	0.521963	0.521963	0.521963	0.521963	0.521963	0.521963	0.521963	0.521963	0.521963	0.521963	0.521963	0.521963
61	8816	0.519851	0.519851	0.519851	0.519851	0.519851	0.519851	0.519851	0.519851	0.519851	0.519851	0.519851	0.519851	0.519851	0.519851	0.519851	0.519851	0.519851	0.519851	0.519851	0.519851	0.519851	0.519851	0.519851	0.519851
62	8864	0.521854	0.521854	0.521854	0.521854	0.521854	0.521854	0.521854	0.521854	0.521854	0.521854	0.521854	0.521854	0.521854	0.521854	0.521854	0.521854	0.521854	0.521854	0.521854	0.521854	0.521854	0.521854	0.521854	0.521854
63	8912	0.524085	0.524085	0.524085	0.524085	0.524085	0.524085	0.524085	0.524085	0.524085	0.524085	0.524085	0.524085	0.524085	0.524085	0.524085	0.524085	0.524085	0.524085	0.524085	0.524085	0.524085	0.524085	0.524085	0.524085
64	8960	0.521217	0.521217	0.521217	0.521217	0.521217	0.521217	0.521217	0.521217	0.521217	0.521217	0.521217	0.521217	0.521217	0.521217	0.521217	0.521217	0.521217	0.521217	0.521217	0.521217	0.521217	0.521217	0.521217	0.521217
65	9008	0.520871	0.520871	0.520871	0.520871	0.520871	0.520871	0.520871	0.520871	0.520871	0.520871	0.520871	0.520871	0.520871	0.520871	0.520871	0.520871	0.520871	0.520871	0.520871	0.520871	0.520871	0.520871	0.520871	0.520871
66	9056	0.520087	0.520087	0.520087	0.520087	0.520087	0.520087	0.520087	0.520087	0.520087	0.520087	0.520087	0.520087	0.520087	0.520087	0.520087	0.520087	0.520087	0.520087	0.520087	0.520087	0.520087	0.520087	0.520087	0.520087
67	9104	0.521066	0.521066	0.521066	0.521066	0.521066	0.521066	0.521066	0.521066	0.521066	0.521066	0.521066	0.521066	0.521066	0.521066	0.521066	0.521066	0.521066	0.521066	0.521066	0.521066	0.521066	0.521066	0.521066	0.521066
68	9152	0.524143	0.524143	0.524143	0.524143	0.524143	0.524143	0.524143	0.524143	0.524143	0.524143	0.524143	0.524143	0.524143	0.524143	0.524143	0.524143	0.524143	0.524143	0.524143	0.524143	0.524143	0.524143	0.524143	0.524143
69	9200	0.520742	0.520742	0.520742	0.520742	0.520742	0.520742	0.520742	0.520742	0.520742	0.520742	0.520742	0.520742	0.520742	0.520742	0.520742	0.520742	0.520742	0.520742	0.520742	0.520742	0.520742	0.520742	0.520742	0.520742
70	9248	0.517789	0.517789	0.517789	0.517789	0.517789	0.517789	0.517789	0.517789	0.517789	0.517789	0.517789	0.517789	0.517789	0.517789	0.517789	0.517789	0.517789	0.517789	0.517789	0.517789	0.517789	0.517789	0.517789	0.517789
71	9296	0.524889	0.524889	0.524889	0.524889	0.524889	0.524889	0.524889	0.524889	0.524889	0.524889	0.524889	0.524889	0.524889	0.524889	0.524889	0.524889	0.524889	0.524889	0.524889	0.524889	0.524889	0.524889	0.524889	0.524889
