# Supplementary material for: Time-varying asymmetry and tail thickness in long series of daily financial returns
Source: publisher site journal article supplement (doi:10.1515/snde-2017-0071), 2018-10-02
Supplement: Supplementary file 455 [file data1_s&p500__Tpar_expect_exp(f_v(t)).xlsx]

## Sheet: 1
	T	exp(f_v(t))	Var3	Var4	Var5	Var6	Var7	Var8	Var9	Var10	Var11	Var12	Var13	Var14	Var15	Var16	Var17	Var18	Var19	Var20	Var21	Var22	Var23	Var24	Var25
1	154	0.225345	0.253048	0	0	0	0	0	0	0	0	0	0	0	0	0	0	0	0	0	0	0	0	0	0
2	332	0.36575	0.438978	0.645504	0.453937	0	0	0	0	0	0	0	0	0	0	0	0	0	0	0	0	0	0	0	0
3	510	0.176121	0.2665	0.397616	0.26066	0.123576	0.114716	0	0	0	0	0	0	0	0	0	0	0	0	0	0	0	0	0	0
4	688	0.591731	1.20148	1.78769	1.09577	0.66781	0.604376	0.453493	0	0	0	0	0	0	0	0	0	0	0	0	0	0	0	0	0
5	866	0.767727	1.19581	1.45106	1.04384	0.65036	0.463821	0.387581	0.425661	0.610346	0	0	0	0	0	0	0	0	0	0	0	0	0	0	0
6	1044	0.795008	1.48663	2.00019	1.47431	0.920421	0.700668	0.642608	0.726467	0.91949	0.911649	0.670055	0	0	0	0	0	0	0	0	0	0	0	0	0
7	1222	0.792616	1.22428	1.58734	1.20173	0.772984	0.577577	0.500917	0.548675	0.63128	0.608412	0.56972	0.640354	0.784337	0	0	0	0	0	0	0	0	0	0	0
8	1400	0.821591	1.40357	1.77026	1.33327	0.863938	0.657268	0.605337	0.637558	0.682266	0.646883	0.605987	0.72759	1.09155	1.547	1.69184	0	0	0	0	0	0	0	0	0
9	1578	1.11643	1.84884	2.19907	1.60399	1.00314	0.764315	0.726062	0.79976	0.828223	0.725959	0.652442	0.784477	1.2303	1.90799	2.19044	1.67855	0	0	0	0	0	0	0	0
10	1756	1.47658	1.98306	2.03033	1.37216	0.913588	0.731538	0.754127	0.939452	0.929425	0.761551	0.729855	0.902526	1.38337	2.02121	2.09281	1.65409	1.21569	1.11243	0	0	0	0	0	0
11	1934	1.58685	2.19598	2.03361	1.31973	0.836301	0.693119	0.772877	0.915522	0.897147	0.744951	0.670231	0.799283	1.23764	1.96722	2.37474	1.8891	1.15023	0.712256	0.559388	0.615354	0	0	0	0
12	2112	1.52592	2.07491	1.99617	1.32007	0.809213	0.630189	0.67186	0.820662	0.877732	0.775728	0.706913	0.844244	1.3235	2.20197	2.71099	2.05435	1.15618	0.692122	0.582652	0.699672	0.898715	0.956806	0	0
13	2290	1.29166	1.83498	1.81251	1.32642	0.93557	0.759043	0.753712	0.806822	0.779193	0.729732	0.806741	1.06874	1.4989	2.00153	2.18247	1.71486	1.09762	0.73602	0.618929	0.682223	0.84789	0.938904	0.909912	0
14	2468	1.64916	2.14799	1.96674	1.31521	0.832424	0.650367	0.672169	0.783012	0.812075	0.717354	0.655932	0.763339	1.17372	1.96462	2.49533	1.98074	1.187	0.776023	0.679745	0.787925	1.00053	1.07651	0.921844	0.76511
15	2646	1.89355	2.17291	2.15507	1.8474	1.42607	1.07207	0.858047	0.778941	0.826913	1.03407	1.44263	2.01949	2.5685	2.80761	2.61294	2.13002	1.62845	1.2685	1.06913	1.00144	1.03444	1.12277	1.18996	1.18043
16	2824	1.22326	1.56187	1.65591	1.4013	1.05015	0.808744	0.709863	0.703834	0.707547	0.697472	0.743537	0.914518	1.25619	1.76706	2.11358	1.80945	1.22813	0.867339	0.74545	0.801959	0.998568	1.152	1.04689	0.824127
17	3002	1.54872	2.02182	1.9034	1.3857	0.949631	0.718851	0.661098	0.7037	0.731224	0.725907	0.812343	1.07776	1.53014	2.12819	2.49593	2.04985	1.2915	0.854137	0.724416	0.809699	1.07184	1.29305	1.18015	0.905354
18	3180	1.5294	2.05773	1.93517	1.3187	0.866623	0.706611	0.714203	0.798646	0.809316	0.716272	0.672606	0.793246	1.16217	1.871	2.43674	2.03895	1.25004	0.783639	0.631418	0.735969	1.03515	1.25282	1.12587	0.87169
19	3358	1.23766	1.86777	2.04607	1.54552	1.05095	0.81517	0.864983	1.22338	1.47587	1.21584	0.962409	1.00989	1.29576	1.73485	2.05845	1.83517	1.31657	0.964015	0.837975	0.901871	1.08071	1.15563	1.00919	0.833242
20	3536	1.53031	1.93782	2.04654	1.74455	1.34584	1.08611	1.0077	1.07113	1.15681	1.16304	1.17655	1.32477	1.64272	2.09166	2.44068	2.29568	1.77972	1.34793	1.13836	1.10729	1.16011	1.14885	1.03892	0.944392
21	3714	1.65287	2.22299	2.54228	2.38801	1.89821	1.38799	1.0382	0.870385	0.859445	0.999536	1.30979	1.7912	2.34319	2.73845	2.78077	2.4947	2.07534	1.69806	1.43614	1.2914	1.23693	1.23572	1.24867	1.24711
22	3892	1.87872	2.23062	2.3385	2.10853	1.68686	1.29217	1.03337	0.919545	0.935385	1.08111	1.37371	1.81315	2.31706	2.69616	2.77367	2.54648	2.16343	1.77857	1.47493	1.27444	1.16596	1.12334	1.11639	1.12222
23	4070	2.15992	1.98807	1.74493	1.48632	1.25967	1.09207	0.992645	0.961319	0.99627	1.09663	1.26025	1.47717	1.72121	1.94563	2.09156	2.11204	1.99866	1.78786	1.53993	1.30932	1.12831	1.00838	0.949286	0.946766
24	4248	1.65206	1.59946	1.49933	1.3772	1.26321	1.17986	1.139	1.14502	1.19855	1.29758	1.43549	1.59734	1.75677	1.87735	1.92201	1.86959	1.72832	1.53336	1.32866	1.14811	1.0084	0.912896	0.858814	0.842236
25	4426	2.19611	2.07224	1.83429	1.55881	1.31002	1.12319	1.0096	0.969246	1.00088	1.10581	1.28535	1.5318	1.81521	2.0753	2.23382	2.23178	2.06675	1.79502	1.49578	1.23147	1.03255	0.904865	0.843293	0.841227
26	4604	2.1339	1.84553	1.537	1.25868	1.04089	0.893145	0.812688	0.79383	0.833428	0.931752	1.08895	1.29709	1.52987	1.73759	1.85874	1.84966	1.712	1.49203	1.2519	1.03962	0.878216	0.771709	0.715561	0.703761
27	4782	1.97067	2.24019	2.22708	1.9383	1.53754	1.18902	0.963323	0.862421	0.874859	1.005	1.27294	1.6831	2.16407	2.5423	2.64164	2.43822	2.06839	1.69273	1.39932	1.20648	1.09963	1.05511	1.048	1.05492
28	4960	2.16189	2.04739	1.82398	1.55619	1.30495	1.10832	0.981004	0.924401	0.936518	1.01688	1.1655	1.37614	1.62561	1.86603	2.03195	2.06781	1.96041	1.74761	1.49441	1.25899	1.07469	0.952143	0.889574	0.881276
29	5138	1.36687	1.24974	1.15211	1.0727	1.00999	0.962412	0.928409	0.906496	0.895262	0.893342	0.899367	0.911902	0.929377	0.950033	0.97189	0.992756	1.01028	1.02209	1.02597	1.02007	1.00314	0.974757	0.935361	0.886284
30	5316	1.81875	1.63476	1.41291	1.19479	1.01176	0.880198	0.804787	0.784773	0.818479	0.904392	1.03861	1.20943	1.39184	1.54707	1.63264	1.62107	1.51517	1.34669	1.15922	0.989213	0.857289	0.770143	0.72657	0.722209
31	5494	1.73253	1.65793	1.5207	1.34984	1.17908	1.035	0.932746	0.878159	0.872382	0.915421	1.00663	1.14148	1.30554	1.46969	1.59346	1.64008	1.59545	1.47608	1.31879	1.16141	1.02926	0.932727	0.871953	0.842902
32	5672	1.97256	1.77095	1.50537	1.29106	1.16834	1.13722	1.1765	1.22229	1.21271	1.17872	1.19459	1.28953	1.45539	1.6608	1.81997	1.81954	1.66466	1.47186	1.32576	1.25786	1.26778	1.29302	1.23064	1.08481
33	5850	1.70001	1.71889	1.68551	1.58377	1.43443	1.28911	1.19451	1.17378	1.23325	1.3707	1.57021	1.78666	1.94512	1.98191	1.89483	1.73579	1.56193	1.41054	1.30287	1.24919	1.24396	1.25806	1.24769	1.18958
34	6028	1.56746	1.67319	1.71116	1.64115	1.50243	1.37805	1.32851	1.37626	1.53045	1.80734	2.22089	2.72166	3.11834	3.15365	2.77171	2.19629	1.68209	1.33265	1.1371	1.05309	1.03969	1.05564	1.05794	1.01945
35	6206	1.53765	1.38161	1.25889	1.18297	1.16058	1.1945	1.28508	1.42963	1.6196	1.83696	2.05172	2.22388	2.31187	2.28685	2.14622	1.91702	1.64533	1.37796	1.14808	0.971098	0.848775	0.775965	0.745658	0.751164
36	6384	1.70944	1.4908	1.31075	1.18518	1.12063	1.11918	1.18176	1.30842	1.49515	1.72796	1.97673	2.19443	2.32708	2.3337	2.20568	1.9717	1.68406	1.39635	1.14667	0.952999	0.817919	0.736215	0.700705	0.70492
37	6562	1.78302	1.59175	1.39254	1.21856	1.08928	1.0129	0.991631	1.02605	1.11661	1.26183	1.45336	1.66951	1.87178	2.01074	2.04349	1.95473	1.76592	1.52413	1.27966	1.06823	0.906411	0.796606	0.734427	0.713838
38	6740	1.5228	1.47219	1.39087	1.30075	1.22127	1.16489	1.13766	1.14215	1.18001	1.25294	1.36151	1.50163	1.65941	1.80804	1.91188	1.9401	1.88284	1.75685	1.59533	1.43104	1.28532	1.16698	1.0769	1.01292
39	6918	1.90243	1.71508	1.49416	1.28357	1.11242	0.993948	0.931285	0.92404	0.972347	1.07754	1.23929	1.44939	1.68411	1.90062	2.04516	2.07452	1.97878	1.78716	1.55164	1.3221	1.13068	0.990413	0.901836	0.86016
40	7096	1.67451	1.58569	1.45774	1.31064	1.17492	1.08028	1.04509	1.07785	1.18413	1.3704	1.63883	1.96652	2.27959	2.46494	2.4461	2.24533	1.95035	1.64507	1.38024	1.17701	1.03732	0.951705	0.905454	0.885877
41	7274	1.53338	1.78365	1.91107	1.84146	1.60895	1.3312	1.11433	1.00629	1.01934	1.16489	1.46376	1.91748	2.44255	2.83863	2.90745	2.64248	2.22272	1.83021	1.54625	1.37327	1.27944	1.2216	1.1591	1.07049
42	7452	1.49601	1.69773	1.80891	1.74681	1.53164	1.27143	1.07233	0.990155	1.05166	1.29069	1.74919	2.40775	3.06601	3.36511	3.10385	2.47423	1.83155	1.37518	1.12211	1.02131	1.01829	1.05983	1.08751	1.05439
43	7630	2.48017	2.53236	2.25832	1.82643	1.42336	1.14099	0.988868	0.949966	1.01587	1.19721	1.51746	1.98623	2.54814	3.04313	3.26007	3.09166	2.63022	2.08018	1.60368	1.26101	1.04392	0.923322	0.873652	0.877628
44	7808	2.16227	1.97128	1.72605	1.48224	1.27912	1.13573	1.0573	1.0437	1.09468	1.21072	1.38901	1.61548	1.85629	2.05681	2.15679	2.11858	1.94946	1.69794	1.42672	1.18479	0.99643	0.866024	0.788224	0.755621
45	7986	1.80897	1.64189	1.44818	1.27069	1.13718	1.06129	1.04883	1.10349	1.229	1.42653	1.68703	1.98101	2.25289	2.43087	2.45555	2.31235	2.0413	1.71465	1.40119	1.14342	0.956111	0.836784	0.776687	0.767044
46	8164	1.75576	1.52037	1.29343	1.10731	0.97736	0.907555	0.897745	0.948368	1.06142	1.23732	1.46782	1.72706	1.96711	2.12672	2.15564	2.04156	1.81801	1.54576	1.28307	1.06656	0.90978	0.811772	0.766195	0.766429
47	8342	2.07217	1.94045	1.72902	1.4986	1.299	1.1548	1.07156	1.04731	1.08012	1.16993	1.31576	1.5084	1.72112	1.90631	2.00876	1.9941	1.87008	1.67954	1.47324	1.28753	1.13896	1.03023	0.957878	0.917122
48	8520	1.83507	1.62365	1.4157	1.24072	1.11262	1.03699	1.01835	1.05789	1.15171	1.29362	1.47495	1.67463	1.85326	1.96324	1.97149	1.8729	1.69081	1.46628	1.24304	1.05337	0.911555	0.81802	0.768032	0.756873
49	8698	1.77523	1.55453	1.33129	1.12872	0.981095	0.886574	0.828233	0.82323	0.867716	0.948111	1.07933	1.24493	1.40963	1.55525	1.63794	1.63416	1.56148	1.42063	1.24768	1.09904	0.976597	0.885489	0.837127	0.809109
50	8876	1.90485	1.72134	1.52258	1.3238	1.14944	1.02365	0.960339	0.964001	1.03638	1.17899	1.38564	1.62427	1.8241	1.90295	1.83043	1.65004	1.43189	1.22618	1.05684	0.931909	0.850917	0.807713	0.792083	0.793098
51	9054	1.80698	1.60025	1.40901	1.25243	1.14069	1.07897	1.06884	1.10953	1.19873	1.33105	1.49386	1.66288	1.80234	1.87437	1.85512	1.7465	1.57445	1.37654	1.18726	1.0292	0.912018	0.836116	0.797069	0.78927
52	9232	1.91341	1.69415	1.4817	1.3037	1.17594	1.10621	1.09737	1.1497	1.26153	1.42676	1.62936	1.83797	2.00667	2.08771	2.05252	1.90641	1.6856	1.43963	1.21151	1.02694	0.894387	0.81091	0.768684	0.760205
53	9410	1.30571	1.28591	1.27489	1.27217	1.27707	1.28872	1.30604	1.32776	1.35241	1.3783	1.40357	1.42623	1.44423	1.4556	1.45854	1.45157	1.43367	1.4044	1.36391	1.31301	1.25304	1.18582	1.11346	1.03819
54	9430	1.74583	1.53254	1.33309	1.17264	1.06416	1.01218	1.01738	1.0793	1.19615	1.36178	1.56067	1.7639	1.93037	2.01684	1.99485	1.86478	1.65674	1.41653	1.18682	0.995217	0.852881	0.759802	0.710841	0.699485
55	8528	1.77626	1.78675	1.73452	1.5932	1.39106	1.19585	1.06755	1.03503	1.10469	1.27529	1.5386	1.84973	2.0976	2.15388	1.98882	1.69917	1.40978	1.19268	1.06556	1.02105	1.03955	1.08398	1.10586	1.07164
56	8576	1.7701	1.57429	1.38288	1.21943	1.09629	1.0172	0.981689	0.988393	1.03627	1.12362	1.24522	1.38849	1.53122	1.64406	1.69945	1.68343	1.60245	1.47962	1.34337	1.21651	1.11178	1.03326	0.980151	0.949782
57	8624	1.77907	1.56914	1.36769	1.20093	1.08217	1.01545	1.00046	1.0358	1.11945	1.24656	1.40539	1.57346	1.71796	1.8033	1.80442	1.71824	1.56505	1.37885	1.19342	1.03273	0.908643	0.823922	0.776538	0.762697
58	8672	1.92624	1.7571	1.5684	1.38529	1.23035	1.12019	1.06293	1.06009	1.11005	1.20883	1.34702	1.50479	1.65043	1.74809	1.77182	1.71558	1.59409	1.43627	1.27436	1.13375	1.02751	0.955961	0.911198	0.885566
59	8720	1.94253	1.71464	1.47827	1.26761	1.10289	0.991776	0.934589	0.929174	0.9734	1.06495	1.19865	1.36222	1.53257	1.67647	1.75861	1.7555	1.667	1.51653	1.33966	1.16939	1.02741	0.923317	0.858352	0.829496
60	8768	1.75938	1.54966	1.33646	1.15041	1.00925	0.91959	0.88185	0.894689	0.95693	1.06667	1.21789	1.39563	1.57254	1.71114	1.77463	1.74283	1.62291	1.44613	1.25268	1.07599	0.935344	0.837308	0.780779	0.761355
61	8816	1.75376	1.52142	1.30778	1.13582	1.01551	0.948637	0.933833	0.969508	1.05418	1.18418	1.3494	1.52881	1.68945	1.79309	1.81025	1.73416	1.58438	1.39697	1.20876	1.04602	0.921815	0.839261	0.796217	0.788418
62	8864	1.81311	1.58805	1.36876	1.18456	1.05058	0.971511	0.947099	0.97604	1.05701	1.18674	1.35568	1.543	1.71479	1.82992	1.85455	1.77799	1.61872	1.41516	1.20837	1.02835	0.890077	0.796987	0.746442	0.733669
63	8912	1.85239	1.59891	1.36551	1.17749	1.04552	0.970842	0.951032	0.983297	1.06498	1.19143	1.35189	1.52545	1.68018	1.77932	1.79438	1.71847	1.57015	1.3845	1.1979	1.03667	0.914106	0.833481	0.792685	0.787368
64	8960	1.73504	1.52674	1.33629	1.18375	1.07783	1.02018	1.00977	1.0454	1.12572	1.24693	1.3987	1.5603	1.70048	1.78445	1.7873	1.70606	1.56139	1.38717	1.21592	1.06944	0.957435	0.881228	0.838115	0.824081
65	9008	1.72836	1.5204	1.32868	1.17569	1.07237	1.02209	1.02505	1.08064	1.18722	1.33924	1.52254	1.71059	1.8656	1.94792	1.93161	1.81716	1.63174	1.41638	1.20923	1.03529	0.905299	0.820159	0.776088	0.767755
66	9056	1.58744	1.41159	1.25988	1.14484	1.0711	1.03879	1.04654	1.09283	1.17548	1.28941	1.4235	1.55834	1.66745	1.72397	1.71117	1.63047	1.50093	1.35033	1.20416	1.07908	0.982463	0.915427	0.876044	0.861199
67	9104	1.82856	1.58628	1.36834	1.19633	1.07855	1.01558	1.00543	1.04609	1.1354	1.26833	1.43263	1.60501	1.75168	1.83637	1.83432	1.74396	1.58791	1.40204	1.22071	1.06709	0.951616	0.875602	0.835836	0.827687
68	9152	1.88478	1.64297	1.40905	1.21254	1.06702	0.974862	0.93353	0.940049	0.992612	1.0895	1.22562	1.38752	1.54963	1.67639	1.73324	1.70233	1.59208	1.43243	1.25969	1.10249	0.97646	0.886342	0.830931	0.806836
69	9200	1.36066	1.33365	1.31382	1.30148	1.29663	1.29899	1.308	1.32284	1.34245	1.36549	1.3904	1.41536	1.43839	1.45742	1.47033	1.47514	1.47015	1.45406	1.42614	1.38632	1.3352	1.27409	1.20484	1.12971
70	9248	1.67823	1.44157	1.23351	1.07406	0.97108	0.925586	0.93667	1.00375	1.12566	1.29663	1.50043	1.70601	1.86989	1.94844	1.9163	1.77927	1.57172	1.34014	1.12464	0.949201	0.82234	0.74294	0.705956	0.705493
71	9296	2.28852	2.09052	1.85069	1.61256	1.40796	1.25371	1.15523	1.11205	1.12178	1.18131	1.28505	1.42116	1.56773	1.69293	1.7625	1.75313	1.66366	1.51551	1.34174	1.17328	1.03048	0.922346	0.850063	0.811039
