# Supplementary material for: Time-varying asymmetry and tail thickness in long series of daily financial returns
Source: publisher site journal article supplement (doi:10.1515/snde-2017-0071), 2018-10-02
Supplement: Supplementary file 459 [file data1_s&p500__Tpar_expect_ni1 (t).xlsx]

## Sheet: 1
	T	ni1 (t)	Var3	Var4	Var5	Var6	Var7	Var8	Var9	Var10	Var11	Var12	Var13	Var14	Var15	Var16	Var17	Var18	Var19	Var20	Var21	Var22	Var23	Var24	Var25
1	154	4.29941	2.62847	0	0	0	0	0	0	0	0	0	0	0	0	0	0	0	0	0	0	0	0	0	0
2	332	3.41261	3.01931	3.43606	9.01274	0	0	0	0	0	0	0	0	0	0	0	0	0	0	0	0	0	0	0	0
3	510	11.2236	4.05182	5.92362	34.2368	49.2531	34.0338	0	0	0	0	0	0	0	0	0	0	0	0	0	0	0	0	0	0
4	688	9.06106	4.65121	5.40226	17.147	19.7742	14.5913	12.806	0	0	0	0	0	0	0	0	0	0	0	0	0	0	0	0	0
5	866	10.6009	3.9587	5.49344	13.8904	14.2971	12.719	14.0801	4.30049	3.69817	0	0	0	0	0	0	0	0	0	0	0	0	0	0	0
6	1044	4.1125	3.75866	4.53045	6.28089	6.52482	5.97172	5.2448	3.35134	3.32089	5.37977	6.07686	0	0	0	0	0	0	0	0	0	0	0	0	0
7	1222	4.91183	3.89373	5.85179	11.6106	10.9767	7.54894	7.71887	4.05753	3.87972	6.5178	6.9624	6.48112	7.90241	0	0	0	0	0	0	0	0	0	0	0
8	1400	4.71135	4.45685	6.79358	10.0284	11.1009	11.4084	7.80979	4.02091	4.3374	9.24976	9.36675	9.25161	10.0291	5.7699	4.19121	0	0	0	0	0	0	0	0	0
9	1578	4.11744	3.71584	6.24147	16.2948	18.4311	8.43691	4.78414	3.29492	3.84319	9.16309	19.171	14.5701	6.99117	3.67528	3.19962	5.41447	0	0	0	0	0	0	0	0
10	1756	2.98042	3.09938	4.90984	11.8302	16.0641	7.68209	3.49992	2.77004	3.1074	5.98203	15.4431	14.7206	5.36372	2.97385	2.89681	4.57481	14.7017	28.8452	0	0	0	0	0	0
11	1934	2.66858	2.88933	4.37532	7.83776	8.9563	5.66683	3.58328	2.82893	2.9733	4.1377	6.51637	6.52056	4.11397	2.9805	2.79624	3.7228	8.7375	21.9666	28.3083	18.2976	0	0	0	0
12	2112	3.07867	3.1198	5.10966	18.6817	21.2192	9.71501	6.20386	3.57947	3.16664	7.81385	9.18434	6.91603	5.61407	3.03538	2.67787	3.96207	7.96774	16.1347	26.9805	13.4091	6.17491	5.249	0	0
13	2290	2.98304	3.29923	4.55317	7.22931	7.6381	4.99569	3.62736	3.17828	3.29437	4.77862	9.19974	9.11391	4.51639	3.05046	3.02695	3.99096	8.1397	19.8197	22.172	11.7488	6.93261	5.83668	7.20335	0
14	2468	2.93506	3.3378	6.61324	13.5376	23.5597	18.6366	5.74719	3.07961	3.78791	8.93371	10.178	8.95526	5.85567	3.30149	2.6324	3.97664	16.308	21.9079	15.8187	10.0828	4.90652	3.57494	4.61453	9.84253
15	2646	4.24699	3.94313	5.70339	10.342	12.576	8.64303	6.55218	4.61782	4.1584	5.29109	7.04686	6.99805	4.79461	3.64862	3.44147	4.97333	9.61176	11.7354	11.2436	10.039	7.213	6.18799	6.72453	7.0397
16	2824	4.25997	3.76965	6.00282	10.733	9.40623	6.37367	6.56759	3.88001	3.88931	7.82639	9.35852	7.48368	6.18403	4.37361	3.26108	4.69683	10.5149	12.0756	12.3231	9.25003	5.4914	4.34771	5.23646	7.42648
17	3002	3.68975	3.63548	5.30327	11.8035	16.6717	10.4921	5.90064	4.22731	3.91703	5.33603	9.90468	10.1931	5.31283	3.20671	2.9279	3.71014	7.06782	16.522	20.7121	10.7734	5.14313	3.87249	3.63705	4.75671
18	3180	2.868	3.17795	4.98306	10.1683	10.7787	5.74718	3.66527	3.19508	3.31698	4.76146	8.87694	9.25954	5.00839	3.27143	3.08473	3.64991	6.47338	15.9756	19.8706	10.7491	6.24546	5.13971	5.05847	7.16308
19	3358	3.74056	3.5598	4.64383	7.15006	8.26093	5.49431	3.49169	3.04273	3.20896	4.02778	5.98035	7.06721	4.96234	3.38889	3.15626	3.92842	7.28149	16.4279	20.4865	11.9335	6.511	5.27404	6.43916	12.4538
20	3536	4.17081	4.12122	5.64198	10.0652	13.2014	9.10824	5.49875	4.21478	4.09853	5.75701	11.2169	14.0783	7.72541	4.01598	3.41262	4.39302	7.91621	12.8779	12.944	8.32939	5.84131	5.31617	5.08174	6.49151
21	3714	3.59425	4.16446	5.23602	6.02027	5.7071	4.86027	4.49591	4.21433	4.23207	4.94413	5.65316	5.90114	4.97247	3.84972	3.67944	4.71917	7.12174	9.44206	9.72638	8.23607	7.11925	6.66775	6.10459	6.81468
22	3892	3.67328	4.13964	5.51913	7.38831	6.82526	5.37078	4.68326	4.14929	4.11676	4.69099	5.20963	5.45852	4.64241	3.7414	3.60575	4.53178	6.95907	10.3103	11.3564	9.80921	8.25258	7.94203	7.77924	8.66413
23	4070	4.31223	4.78476	6.67586	10.3239	11.8225	8.34835	5.11946	3.9592	3.98002	5.02603	6.81949	7.04342	5.26465	3.98198	3.73064	4.3723	6.85188	12.9076	17.386	13.0707	8.14189	6.3415	6.23922	7.52043
24	4248	3.89069	4.36084	5.41347	6.57392	6.13375	4.47911	3.43905	3.07914	3.12281	3.57927	4.30084	4.39363	3.79343	3.45379	3.58195	4.17677	5.67184	8.78149	11.6166	10.6443	8.19182	6.84224	6.7212	8.07418
25	4426	3.31335	4.02322	5.61952	7.26978	6.75871	4.93579	3.78736	3.40595	3.58365	4.45457	5.66524	5.53412	4.25107	3.41858	3.27367	3.7785	5.58159	9.83462	13.9079	12.2635	8.45367	6.46563	6.18303	7.49395
26	4604	3.16702	3.75916	5.47738	7.88127	8.00327	5.60901	3.822	3.26024	3.519	4.70453	6.54661	6.81273	5.00746	3.61132	3.19725	3.5782	5.28613	9.28546	12.8514	10.9579	7.36136	5.66302	5.91044	8.49952
27	4782	3.84609	4.28116	5.5378	9.70743	10.6883	7.49935	6.58504	4.77216	4.79256	7.63609	8.68071	8.26355	6.76659	4.18279	3.5877	4.31032	6.17844	9.28421	11.447	8.82866	6.72008	5.41308	5.47443	8.83428
28	4960	3.72134	4.12534	5.61557	6.41777	5.9363	5.2741	4.46185	3.86313	3.89671	4.82525	5.17257	5.24873	5.3328	4.34171	3.42577	4.04942	6.6284	7.97536	8.34002	8.30963	7.58744	6.8205	6.6259	7.7336
29	5138	3.2455	4.104	5.08318	5.17631	4.82523	4.48101	3.54765	3.1118	3.52706	4.81967	5.09325	5.21349	5.61425	4.54435	3.50641	4.20653	6.60819	6.89672	6.80459	6.95111	5.99108	4.78861	5.15493	8.11465
30	5316	3.95317	4.43411	5.3457	5.66541	5.81368	5.35761	4.18024	3.52397	3.61867	4.59884	5.17206	5.35629	5.02289	4.03222	3.56998	4.19734	6.34082	7.47394	7.79802	7.92145	7.23183	6.4441	6.51092	8.4229
31	5494	3.35324	4.21862	5.45621	5.6167	6.27639	6.09246	3.99625	3.23348	3.86569	5.55644	5.50363	5.716	6.12522	4.41715	3.47916	4.21014	7.06778	7.61391	7.33095	7.76001	6.01263	4.24141	4.82297	8.98798
32	5672	3.75126	4.07689	5.23545	6.44161	6.09119	5.03158	4.04063	3.24926	3.43809	4.41037	5.43904	5.91355	4.94106	3.95786	3.44637	3.90556	5.56137	7.37566	8.50624	7.90621	6.63609	5.09519	5.33606	7.15259
33	5850	3.97526	4.57966	5.03711	5.26676	5.46839	4.95599	3.71365	3.15639	3.33949	3.62848	3.8437	4.15266	4.32512	4.02371	3.7375	4.55477	6.28396	7.13156	7.79184	7.6881	6.52089	5.17345	5.22779	6.6129
34	6028	3.89731	4.20932	4.71155	5.24997	5.37599	4.9254	4.22128	3.5967	3.17792	2.93887	2.86806	2.87463	2.90999	3.06462	3.40283	4.02397	5.01456	6.28571	7.30852	7.62527	7.47555	7.11449	6.62137	6.18674
35	6206	4.93316	4.86492	4.99207	5.09508	4.66582	3.80108	3.13579	2.81613	2.73296	2.83568	3.05631	3.17245	3.11256	3.11987	3.36631	3.95662	5.11124	6.97064	8.58892	8.68506	7.94456	7.33987	7.10306	7.31721
36	6384	4.60306	4.52021	4.82994	5.2893	5.07721	4.05537	3.20535	2.82352	2.72196	2.8253	3.14062	3.38639	3.2923	3.18084	3.33044	3.90849	5.25493	7.65311	9.76193	9.5918	8.35905	7.5946	7.31063	7.60822
37	6562	3.81167	4.16968	5.55912	7.3619	7.06253	4.96758	3.54277	3.10678	3.16012	3.60824	4.42174	4.69706	4.07169	3.42258	3.19427	3.64408	5.42637	9.23068	12.5113	10.8839	7.55259	5.84681	5.64362	6.77702
38	6740	4.27683	4.67994	5.78595	6.36615	6.53323	6.30026	4.4946	3.29118	3.45306	5.17383	7.46301	8.33743	6.12802	4.10387	3.31584	4.12441	6.80731	7.76815	7.47619	7.43591	6.0205	4.81677	4.79307	6.57682
39	6918	4.37156	4.60803	5.42579	6.08198	5.8186	4.73214	4.04918	3.86345	4.08555	4.88767	5.30278	5.45114	5.50159	4.19994	3.57024	4.00482	5.0222	6.33623	6.60771	5.67426	5.48251	4.82504	4.69797	5.8895
40	7096	5.86701	5.65366	5.09629	5.75218	5.25747	4.57853	4.2872	3.55257	3.42942	3.75579	3.77458	4.05802	4.05049	3.53586	3.77134	4.408	4.8374	6.25183	7.05838	6.74538	7.86985	7.30253	6.60467	8.14041
41	7274	4.101	4.26052	5.16039	4.64275	3.75838	4.10482	4.25357	3.49197	3.88284	4.8676	4.17817	3.71078	4.68952	4.75075	3.40029	3.78637	5.80257	5.27181	4.5055	5.22876	5.77364	4.59577	4.88147	6.44644
42	7452	4.40334	4.80079	4.95746	4.6528	4.09732	3.65435	3.37458	3.20909	3.16089	3.21548	3.2564	3.15546	3.01857	3.05022	3.33786	3.95396	4.96897	6.19112	6.9628	6.85059	6.38621	6.05745	6.02373	6.5344
43	7630	3.27253	3.86757	4.94145	5.71031	5.37013	4.49171	3.84814	3.60086	3.75504	4.10496	4.19183	3.8406	3.42052	3.14609	3.04851	3.45848	4.62994	6.45952	8.16574	8.0675	6.58622	5.39289	5.06769	5.50823
44	7808	3.98443	4.37875	5.48627	5.71845	4.56456	4.26522	3.95776	3.35628	3.35062	4.43338	5.31522	5.39974	4.80488	3.85529	3.27297	3.90939	5.94726	6.55842	6.43941	7.06722	6.23875	5.55314	5.73016	6.75902
45	7986	5.14729	5.15645	5.10147	4.92968	4.64589	4.30159	3.94604	3.62587	3.37966	3.22662	3.15689	3.15263	3.23291	3.43555	3.79681	4.35728	5.14466	6.11161	7.06929	7.77636	8.10016	8.03721	7.70098	7.2713
46	8164	5.35676	5.43079	5.43035	5.31176	5.06076	4.70128	4.28845	3.88943	3.5603	3.33176	3.21205	3.2012	3.30488	3.54218	3.9458	4.55084	5.36527	6.32507	7.26387	7.94981	8.20551	8.02317	7.55757	7.01409
47	8342	3.79138	4.27028	5.28021	6.43208	6.41882	5.07318	3.9485	3.54902	3.65757	4.19158	4.89038	4.92507	4.19816	3.58635	3.47681	3.95509	5.35469	7.73388	9.07461	7.64385	5.66772	4.70544	4.62309	5.43763
48	8520	5.29304	5.08084	4.98806	4.87474	4.59782	4.21161	3.84643	3.59476	3.47974	3.46435	3.54624	3.67521	3.76538	3.83147	4.0163	4.58559	5.54047	6.51135	7.25066	7.63431	7.65187	7.50543	7.46616	7.66694
49	8698	4.40466	4.81471	5.71192	6.48266	6.6892	5.94782	4.82752	4.07566	4.07022	4.61167	5.11054	5.22092	4.72113	4.11868	3.8125	4.25297	5.58598	7.0624	7.99167	7.48779	6.24584	5.31311	5.3594	6.35185
50	8876	5.52781	5.49003	6.12163	7.29019	7.36777	5.76055	4.3455	3.70262	3.57512	3.91289	4.67097	4.98372	4.35513	3.77961	3.73538	4.2351	5.54418	7.91015	9.48477	8.49637	7.14475	6.68759	7.03492	8.44146
51	9054	6.40105	5.80363	5.20432	4.66685	4.22245	3.87732	3.62414	3.45141	3.34893	3.31049	3.33484	3.42593	3.59254	3.84667	4.20017	4.65848	5.21205	5.82829	6.44904	6.9989	7.40437	7.61677	7.62745	7.46783
52	9232	5.85558	5.34277	4.83235	4.37506	3.99397	3.69275	3.46582	3.30514	3.20384	3.15778	3.16644	3.23334	3.36608	3.57561	3.874	4.27012	4.76318	5.33551	5.94751	6.53868	7.03749	7.37879	7.52297	7.46836
53	9410	4.85229	5.27183	5.80256	6.04721	5.44361	4.28469	3.52349	3.29966	3.45796	3.91886	4.4621	4.49392	3.92926	3.47948	3.45113	3.91626	5.11372	7.06466	8.25977	7.39494	6.03504	5.38956	5.6044	6.84229
54	9430	5.4288	5.10814	4.8115	4.54024	4.22507	3.8563	3.52966	3.2956	3.1498	3.08786	3.10652	3.17789	3.27303	3.42654	3.69201	4.09928	4.67734	5.42884	6.19044	6.71292	7.02872	7.25519	7.40371	7.48786
55	8528	4.16338	4.50553	4.95008	5.35958	5.31423	4.7989	4.14985	3.6698	3.65181	3.9905	4.46811	4.55768	4.08779	3.62664	3.58085	4.33301	5.84932	7.13482	7.43287	6.68415	5.95131	5.7399	5.52597	5.52394
56	8576	4.91666	4.88426	5.38562	6.11842	5.65987	4.93584	4.5233	3.8908	3.89982	4.52726	4.84609	4.87328	4.57515	4.08868	4.01768	4.43742	5.37919	6.63663	7.15932	6.90008	6.5143	5.7204	5.85265	6.94098
57	8624	6.62509	5.35119	5.32088	5.48752	4.88932	4.80636	5.48992	3.89152	3.44583	4.17664	5.08338	4.43545	4.38798	4.23055	3.83858	4.53349	6.71893	6.52218	6.58236	7.08366	8.09867	6.84763	6.88214	7.6345
58	8672	4.77095	4.63613	5.00258	5.55245	5.14761	4.55069	4.28194	3.73804	3.64938	4.00743	4.31745	4.5063	4.37353	4.19552	4.16692	4.5955	5.71925	6.85758	7.5634	7.53128	6.77889	5.97204	6.2375	7.13886
59	8720	5.3528	4.8541	4.95574	4.97296	4.55204	4.4061	4.29112	3.69385	3.67029	4.13393	4.18203	4.24871	4.49958	4.42335	4.10424	4.54893	5.52688	5.7418	5.95085	6.56694	6.65559	6.29336	6.73577	7.4826
60	8768	5.51256	5.09522	4.8873	4.85385	4.57757	4.37958	4.18575	3.87148	3.83622	3.86697	3.86995	4.03822	4.06691	4.11188	4.42637	4.77479	5.34793	6.04518	6.4366	6.76848	7.00831	6.94688	7.16667	7.45718
61	8816	5.86094	5.40363	5.03209	4.72513	4.42362	4.09612	3.8039	3.59587	3.47701	3.45806	3.53835	3.6509	3.74203	3.89003	4.1853	4.66417	5.31967	6.07482	6.74994	7.22137	7.59717	7.91268	8.08563	8.2026
62	8864	5.39744	5.06649	5.98864	7.42539	7.60506	6.01478	4.45192	3.84939	3.58492	3.66788	4.36587	4.99177	4.69064	3.87601	3.48077	3.85629	5.3458	7.85266	9.32791	8.2231	6.81961	6.68295	6.83356	7.99247
63	8912	5.79557	5.33842	5.71352	6.79086	7.24234	5.80545	4.1662	3.4192	3.29649	3.64717	4.45606	5.02999	4.58778	3.93692	3.77415	4.1694	5.41878	7.90816	9.9381	9.07553	7.28981	6.47439	6.74092	8.3013
64	8960	6.04824	5.85737	5.79045	5.6968	5.30297	4.56623	3.92623	3.59916	3.5099	3.59252	3.76817	3.86028	3.79893	3.78044	3.9599	4.37707	5.11525	6.2231	7.17604	7.26002	6.92401	6.76452	6.8849	7.35202
65	9008	6.91768	6.22216	5.52991	4.90925	4.39564	3.9974	3.70677	3.50987	3.3934	3.34807	3.37004	3.46128	3.62917	3.88518	4.24168	4.70602	5.27178	5.9094	6.56106	7.14647	7.58186	7.80659	7.80413	7.60583
66	9056	5.93444	5.49498	5.53871	5.96518	5.94559	4.98967	4.02735	3.53651	3.40658	3.57435	3.9929	4.26124	4.10465	3.93937	4.04852	4.47533	5.35289	6.74312	7.74385	7.46802	6.81465	6.51838	6.65652	7.32998
67	9104	5.78921	5.47908	5.49065	5.71805	5.46686	4.56597	3.79889	3.43714	3.3659	3.55557	3.94679	4.14225	3.96518	3.83039	3.97308	4.41847	5.29462	6.64484	7.58727	7.35097	6.81406	6.60205	6.74874	7.39822
68	9152	5.20093	4.8968	5.81465	7.73276	8.55875	6.58966	4.39695	3.42981	3.28839	3.73803	4.71643	5.35667	4.74213	3.82962	3.47076	3.8053	5.27244	8.41719	10.9273	9.5437	6.96913	5.82145	6.35652	8.92137
69	9200	5.26321	5.19918	5.34518	5.46839	5.07238	4.25587	3.67586	3.47004	3.54872	3.8882	4.35494	4.48299	4.18121	3.97109	4.05656	4.43169	5.19986	6.34044	6.957	6.44546	5.74303	5.4381	5.57974	6.28256
70	9248	6.0546	5.78418	5.36432	4.85948	4.35102	3.90536	3.55656	3.30963	3.15445	3.07844	3.07347	3.13892	3.28273	3.52139	3.87797	4.37538	5.02188	5.79113	6.60929	7.36497	7.9433	8.2669	8.3208	8.14952
71	9296	3.59359	3.69474	4.60005	5.93071	6.11992	5.00611	3.86844	3.38973	3.62362	4.44079	5.66379	6.09107	4.96159	3.91646	3.5967	3.85568	5.10125	7.1182	7.59587	6.14988	4.67702	4.07641	4.64676	6.62111
