# Supplementary material for: Time-varying asymmetry and tail thickness in long series of daily financial returns
Source: publisher site journal article supplement (doi:10.1515/snde-2017-0071), 2018-10-02
Supplement: Supplementary file 461 [file data1_s&p500__Tpar_expect_ni2 (t).xlsx]

## Sheet: 1
	T	ni2 (t)	Var3	Var4	Var5	Var6	Var7	Var8	Var9	Var10	Var11	Var12	Var13	Var14	Var15	Var16	Var17	Var18	Var19	Var20	Var21	Var22	Var23	Var24	Var25
1	154	59.7739	74.4471	0	0	0	0	0	0	0	0	0	0	0	0	0	0	0	0	0	0	0	0	0	0
2	332	51.3424	77.1271	70.8114	44.1146	0	0	0	0	0	0	0	0	0	0	0	0	0	0	0	0	0	0	0	0
3	510	29.1392	53.108	76.0865	67.8217	82.0078	66.6973	0	0	0	0	0	0	0	0	0	0	0	0	0	0	0	0	0	0
4	688	19.0322	31.6782	41.4568	34.9048	58.833	30.6926	26.4004	0	0	0	0	0	0	0	0	0	0	0	0	0	0	0	0	0
5	866	24.8806	41.7655	42.7125	41.3593	36.7348	31.5641	15.9998	10.1386	20.5109	0	0	0	0	0	0	0	0	0	0	0	0	0	0	0
6	1044	28.7222	38.1895	41.4164	41.4975	38.1393	27.0871	14.3096	12.5689	20.9592	34.0474	35.7122	0	0	0	0	0	0	0	0	0	0	0	0	0
7	1222	20.2257	32.3741	49.7822	42.5723	38.941	34.3551	12.9439	10.4491	24.1422	29.5054	38.119	49.8786	36.4674	0	0	0	0	0	0	0	0	0	0	0
8	1400	6.73701	13.5078	20.1384	19.6735	20.2331	17.4962	5.66344	5.09797	10.9085	18.5729	20.6137	21.8604	13.2522	4.5278	4.23229	0	0	0	0	0	0	0	0	0
9	1578	7.99373	11.4827	28.4822	54.6052	44.0878	13.1685	6.23411	4.92261	8.32764	25.6605	58.2083	44.0603	11.4928	4.59928	4.13371	8.12437	0	0	0	0	0	0	0	0
10	1756	10.2869	14.6297	32.9684	69.9933	56.0451	18.6504	8.11097	7.13413	10.9348	32.6969	72.378	52.5891	12.7282	4.82527	4.29935	8.26995	36.2988	70.3548	0	0	0	0	0	0
11	1934	11.6241	19.757	52.4204	94.8593	82.5389	32.6516	10.7325	7.10761	10.7427	29.3493	63.6459	47.3005	14.4741	5.44593	4.47078	7.91845	26.8687	61.4418	51.9495	22.6254	0	0	0	0
12	2112	8.30159	12.3649	33.4394	63.2159	71.551	36.4174	15.8879	14.0837	16.3548	33.8309	64.4937	48.6736	16.8111	6.78819	4.59996	7.93978	21.8192	50.4519	69.309	42.9913	24.0873	18.1625	0	0
13	2290	13.5366	19.3496	30.2655	44.2005	36.3157	17.8645	13.7969	12.5993	11.9817	20.7014	34.8315	27.3354	10.8359	5.53376	5.09302	8.3792	23.6464	49.3065	50.7772	34.6948	26.1544	24.1533	28.3279	0
14	2468	5.44248	9.68031	22.5375	35.7244	40.5252	32.5304	9.91223	6.96897	22.8984	66.4981	64.3072	41.2495	15.2228	5.56509	4.41039	9.37313	34.0264	45.772	39.9757	22.6025	14.998	21.1978	27.4699	45.8172
15	2646	20.4276	22.9962	26.7278	21.8922	16.8349	15.6185	13.1686	13.6274	19.5398	24.472	26.4189	20.2837	11.2124	5.68575	5.20604	8.57004	16.8324	18.6489	23.7277	25.1847	28.335	35.392	34.5963	30.5957
16	2824	13.0116	19.4007	32.7089	25.6663	19.7416	14.7623	9.59367	8.66354	17.5736	31.5213	41.1964	32.9908	19.1671	7.26941	5.45462	11.9761	17.8095	18.9521	33.3965	22.8717	13.8912	18.5187	18.6842	15.4721
17	3002	18.0971	39.1403	58.4082	71.3667	42.6674	16.7006	9.42309	8.78685	12.0454	32.5685	59.8338	51.8676	15.5291	5.33846	4.34472	6.83917	21.0585	47.9215	51.8459	38.2751	29.4525	25.1903	23.6631	32.4886
18	3180	11.3542	16.5702	28.0327	39.2255	35.6886	26.1841	20.4249	17.1928	18.0744	26.4801	31.4112	20.3772	9.50865	6.07979	5.89284	8.24435	15.3451	26.4485	28.7529	22.3582	18.6664	17.837	18.8973	23.3691
19	3358	12.3357	16.2002	26.3239	34.8917	27.8148	14.6667	8.83348	7.56292	8.94947	12.9766	16.316	12.774	7.5386	5.27175	5.24793	7.73902	16.1369	29.0946	30.4285	20.9578	13.4832	11.5453	15.0798	24.8096
20	3536	14.9552	18.5544	25.3988	28.2436	24.1037	18.9367	16.2531	14.3408	13.538	17.8423	25.9831	26.2728	12.353	5.785	5.27472	8.90601	18.8964	19.1447	13.2065	11.1808	13.2902	17.2393	16.9938	16.7129
21	3714	19.0537	23.8746	22.9198	20.695	21.5968	23.695	24.5513	23.953	19.7348	19.7183	20.7586	18.9895	11.6333	6.93143	5.60858	8.90768	14.9913	15.2693	17.9847	18.6617	16.7232	18.9649	14.8067	13.4492
22	3892	12.5773	14.5791	20.4843	24.917	26.224	25.7914	24.5707	24.0206	21.4949	17.301	13.1695	10.9342	8.83117	5.95114	5.3018	6.7775	9.63508	11.8421	15.2777	17.9759	19.7969	22.0593	20.3537	17.3955
23	4070	24.103	26.4332	28.3089	27.2063	22.4706	16.3332	11.8289	9.58329	8.99685	9.44145	9.7941	8.75656	6.9868	5.92559	5.91345	6.97781	9.64278	14.4569	19.7799	21.9985	21.1717	20.3491	20.7198	20.8235
24	4248	20.1657	23.6284	31.6255	37.8162	35.0888	27.3046	21.5899	17.9362	15.0576	12.8911	11.1215	9.04521	6.97183	5.71714	5.43347	6.25956	9.2433	16.7205	26.4957	29.8563	26.1364	22.7931	20.7366	19.0301
25	4426	12.6956	17.2721	25.9797	33.8786	33.0512	24.7672	17.2177	13.6139	12.8486	13.6423	13.9402	11.6852	8.08482	5.73117	5.00208	5.74675	9.17128	18.1041	29.9326	33.0296	26.5204	20.6691	18.4811	18.6748
26	4604	15.2671	19.8954	30.1137	41.0268	40.159	27.4671	16.4167	11.1352	9.55661	9.91395	10.667	10.0376	7.86778	6.03648	5.46121	6.48388	10.5199	20.3936	34.8431	39.8984	31.834	22.7451	18.0979	17.293
27	4782	9.33336	17.1042	14.8133	18.4074	31.0661	14.4198	13.4033	20.9969	11.4674	14.6664	17.6335	9.25347	9.70642	7.88599	5.15972	8.81918	10.8242	9.08268	21.6979	16.969	11.9789	25.8837	17.8878	17.362
28	4960	10.3021	13.7107	16.5288	18.1766	19.0343	18.7358	16.962	14.8064	12.7818	11.9437	10.9283	10.7993	9.98584	6.59338	5.47142	7.87145	10.9189	11.4411	13.975	16.2401	16.6903	15.8616	14.611	14.8487
29	5138	8.52714	13.0345	13.8602	12.8247	13.8909	12.5503	8.9478	8.53775	10.0044	11.8891	11.7607	12.0291	13.2473	7.98413	5.52308	8.30495	11.2947	9.26418	11.7797	12.9663	9.85431	9.13676	9.38912	11.8213
30	5316	10.8838	16.0342	19.4623	18.9676	20.9556	18.6059	14.1452	11.7124	10.9485	12.2095	11.3937	9.40278	9.12484	7.32707	5.84708	7.97182	12.4324	11.6613	13.9891	17.5039	18.3204	19.0359	18.603	18.7275
31	5494	7.44101	14.4955	16.7176	9.77034	11.3313	12.6496	7.75582	7.11574	13.9023	22.54	12.4367	11.5378	13.776	8.591	5.83921	9.93919	24.3039	11.6365	8.69673	12.4343	11.8273	8.94653	12.1079	29.5982
32	5672	8.00185	12.8744	15.2664	13.4585	15.4675	14.7285	10.3568	10.6559	10.7889	12.8435	12.7573	9.43968	9.59601	8.45196	5.37778	7.69928	12.0275	10.6094	10.8677	13.1496	12.9953	10.1397	11.1665	15.6135
33	5850	11.6652	15.4589	14.0396	13.5475	15.0416	15.1661	9.51382	9.46112	16.492	13.6818	9.5475	10.13	11.0676	6.98035	6.06924	9.24846	13.6674	14.8653	15.101	19.0131	15.8552	11.8239	15.2097	20.0327
34	6028	15.1508	14.6638	16.2225	18.5812	20.1869	22.0639	23.7022	23.3731	19.8728	15.6847	12.2655	9.76276	7.87285	6.56877	6.21525	6.87132	8.58252	11.1411	15.1057	21.0512	27.7401	31.4421	29.4631	23.7645
35	6206	18.8332	20.2587	20.9057	20.492	18.254	15.2608	12.6	10.7416	9.57777	8.82633	8.26036	7.45386	6.57061	6.13538	6.3838	7.63924	10.2595	14.1013	17.9303	20.8547	23.4681	25.6191	25.5362	22.4313
36	6384	19.494	20.186	21.2606	20.3701	16.6387	12.7408	10.4115	9.13539	8.40671	8.23423	8.1279	7.49924	6.60954	6.11705	6.52828	8.42908	12.1645	15.9871	18.0162	19.9582	23.2305	25.843	26.7659	25.1059
37	6562	12.3101	14.9198	19.0032	21.4524	19.9384	16.0956	12.8688	10.9399	9.75831	9.16383	8.76799	8.17484	7.08579	6.0568	6.08122	7.6582	10.4952	13.5138	16.7319	18.3305	17.0196	14.7066	13.6189	13.6312
38	6740	12.0894	14.8516	14.5487	12.7979	12.4127	11.7025	9.54591	8.02972	9.27556	11.5423	12.9958	12.6743	9.61955	6.21737	5.9794	9.485	12.7839	10.2039	8.92636	9.29063	8.25679	8.68887	8.59967	9.16333
39	6918	7.71467	26.5244	17.146	10.9561	33.2532	11.2386	9.19745	29.4924	8.6002	10.8904	24.0806	9.16689	15.3924	17.0599	5.56046	14.22	19.0653	6.70842	17.3967	15.3312	6.88253	18.4654	9.13015	6.95504
40	7096	10.2889	25.3565	16.4216	9.82124	22.7925	10.7072	7.95154	14.1638	7.13892	6.92607	9.8907	5.81511	6.62208	8.70399	5.22773	8.8753	11.9868	7.67579	16.7507	15.9721	10.1827	27.0498	15.3313	10.8606
41	7274	10.3936	13.9702	12.5465	9.3088	10.4022	11.3634	8.44776	7.91933	10.6335	10.0096	8.12195	9.34712	10.9144	7.47178	6.28615	8.84107	10.5396	8.20534	8.49989	10.222	9.23006	7.22093	7.86873	9.20699
42	7452	18.8426	16.6185	16.1073	15.2352	13.6438	13.0854	14.0785	15.5975	16.4049	15.9803	14.4662	12.124	9.40173	7.1577	5.9165	5.66664	6.46271	8.65069	11.8245	13.706	13.5333	13.0528	12.7945	12.3139
43	7630	6.6238	7.97108	11.7607	16.8895	20.7252	20.8188	17.6714	14.4925	12.862	12.5197	11.7916	10.2628	7.91473	5.91216	5.05734	5.3687	6.70812	9.58463	15.4437	21.6511	21.9827	17.3619	13.0347	10.5029
44	7808	11.5493	13.9983	16.1502	13.7386	12.111	12.4963	9.99946	8.22163	8.62733	8.8687	8.12658	9.32884	9.97769	6.86151	6.06428	7.93368	9.34303	9.93642	11.4452	12.3664	10.86	10.5056	10.6168	9.48758
45	7986	18.0379	16.3469	15.3062	14.7171	14.3833	14.1524	13.8608	13.281	12.2091	10.6837	9.02825	7.60438	6.60515	6.08045	6.05208	6.5918	7.87742	10.2272	14.0354	19.4653	25.7676	30.4842	30.4304	25.4598
46	8164	17.3477	14.8546	13.3312	12.5525	12.1999	12.0316	11.8866	11.6196	11.0857	10.2128	9.07802	7.89295	6.89978	6.27741	6.13464	6.58052	7.80845	10.1246	13.825	18.8148	24.0627	27.4908	27.1002	22.8252
47	8342	8.82946	8.85662	9.89104	11.1987	11.3713	10.8886	11.2447	12.5353	14.4873	16.1405	15.5223	12.1204	8.38461	6.18605	5.33681	5.38909	6.30352	8.57316	12.4218	15.5505	16.014	15.5345	15.0586	14.0679
48	8520	15.463	13.8419	12.4965	11.8174	11.2425	9.87217	9.18241	9.20835	9.13003	8.74622	8.44078	8.08056	7.31896	6.44329	6.21938	6.73837	7.3525	7.76089	8.73751	10.109	11.426	12.1558	12.5589	12.0473
49	8698	7.13118	8.33362	9.60302	10.6085	11.4642	11.1592	10.3347	10.626	11.6935	13.0264	12.6937	10.4342	8.05397	6.15469	5.14518	5.58103	6.69852	8.25197	11.0106	13.2588	13.2169	12.3921	12.2287	12.0434
50	8876	12.2455	12.5625	12.2085	10.6369	8.38014	6.56624	5.54844	5.09487	5.01301	5.15008	5.2755	5.23898	5.15698	5.29145	5.91184	7.34296	9.79393	12.6526	14.6971	15.5178	15.5737	15.3507	14.7281	13.2915
51	9054	12.9243	13.1883	12.7677	11.7948	10.5032	9.12873	7.8488	6.76874	5.93425	5.35129	5.00687	4.88795	4.99605	5.3558	6.01574	7.03559	8.45062	10.2092	12.1068	13.7774	14.8001	14.8944	14.0665	12.5917
52	9232	12.194	12.5792	12.3265	11.4928	10.2697	8.90234	7.60449	6.51098	5.67607	5.09943	4.75766	4.62825	4.70388	4.99871	5.54774	6.3963	7.5735	9.04706	10.6738	12.1838	13.2413	13.5776	13.1197	12.0222
53	9410	10.9061	11.9204	12.7583	11.794	9.05874	6.3879	4.78034	4.0686	3.93594	4.24241	4.86047	5.43224	5.59242	5.52589	5.7799	6.87534	9.40374	13.9015	19.5059	22.2387	19.6713	15.3277	12.2981	10.6546
54	9430	10.3246	10.4212	10.0674	9.36589	8.52576	7.71467	6.98824	6.34241	5.78324	5.33472	5.01709	4.86662	4.93336	5.26792	5.92891	6.9574	8.29427	9.79403	11.3423	12.7635	13.7507	14.0097	13.4359	12.1662
55	8528	8.92645	9.90452	10.4617	10.1631	10.1408	10.5154	10.4603	10.6582	11.0892	11.5354	12.1398	11.6343	8.99671	6.33534	5.45761	6.1689	7.45958	8.51161	9.42521	10.3794	11.0337	11.2416	10.6475	9.60136
56	8576	8.94412	13.5747	13.3628	9.20008	14.6491	10.6806	8.55996	13.9634	8.9501	9.48841	14.1629	7.87698	8.05841	9.93694	5.39859	7.61782	10.7587	7.03323	11.8251	12.7475	8.85698	15.1785	12.0419	9.49029
57	8624	11.2663	13.0937	13.4843	9.89222	11.0822	10.8213	10.1434	10.3219	8.49979	8.24642	9.23986	7.80749	7.32808	7.66398	5.90545	7.79715	10.7445	8.6565	10.668	12.501	11.5039	15.5487	14.4406	11.818
58	8672	11.5227	13.7696	12.9403	10.1766	13.3507	11.5785	9.99865	15.1469	11.1704	10.7335	12.808	8.40701	7.96251	8.33246	5.78779	7.01956	8.37824	6.59706	10.11	11.0858	8.27807	14.5849	11.7685	8.94063
59	8720	10.3987	11.989	13.0461	10.6794	11.4806	11.978	10.4496	10.7288	9.94152	8.92743	8.89116	7.70744	7.70322	7.54995	6.09906	7.21047	7.91348	6.75612	7.94129	8.50809	7.80358	9.31921	9.22154	7.96486
60	8768	11.1182	12.3108	13.0524	11.9201	13.7211	13.9358	13.6843	15.501	13.6966	11.7542	11.7365	8.71788	7.48449	7.92931	5.94205	6.81299	8.55349	7.96062	9.32164	9.57881	8.44092	10.1483	9.88235	9.00865
61	8816	11.816	12.4909	12.9722	13.2119	13.2297	13.0702	12.6904	11.8949	10.6938	9.3414	8.07056	7.02816	6.2492	5.83499	5.85484	6.25199	6.91256	7.66536	8.49655	9.34793	10.0329	10.329	10.0941	9.42551
62	8864	12.5688	15.9412	17.9764	15.176	11.4194	8.92073	7.82939	6.19044	5.1696	5.35785	5.8945	5.91679	5.19452	4.95657	5.9533	9.0327	13.5525	16.1668	15.9413	15.7074	17.5108	16.6557	15.5389	15.9945
63	8912	10.0659	10.8794	12.0057	12.0763	10.2116	8.06797	6.81252	6.19208	5.93422	5.96716	6.01299	5.66181	5.22177	5.21641	5.91907	7.77372	11.2424	14.6817	15.0552	13.9722	13.5955	13.8547	14.3783	14.3743
64	8960	13.0842	13.6949	13.3922	11.796	9.5405	7.64562	6.45138	5.8114	5.5392	5.47219	5.45094	5.38063	5.30883	5.4122	5.9632	7.32242	9.73166	12.7192	15.3778	16.9474	16.9979	16.1217	14.8543	13.1367
65	9008	13.2274	13.6815	13.357	12.3477	10.9173	9.37302	7.95437	6.79073	5.91982	5.32795	4.98535	4.86904	4.97563	5.32735	5.97181	6.97003	8.36279	10.1101	12.0233	13.7466	14.8513	15.0271	14.2461	12.7705
66	9056	12.0766	12.6347	12.8768	12.1528	10.3276	8.38191	7.04529	6.2441	5.78572	5.5503	5.4012	5.21277	5.09134	5.29361	6.02466	7.55806	10.1043	12.8868	14.227	14.3973	14.6154	14.9309	15.0572	14.3977
67	9104	13.5992	14.0624	13.725	12.4322	10.5041	8.66009	7.25144	6.28515	5.70465	5.44316	5.30755	5.13919	5.1266	5.44929	6.23464	7.67094	9.72898	11.6533	12.825	13.5469	13.9375	13.9442	13.517	12.4768
68	9152	12.7229	14.6801	16.8278	15.8396	11.3355	7.25424	5.2835	4.70526	4.8807	5.41911	5.706	5.37152	4.94727	5.06121	6.20954	9.30633	14.9378	19.7947	19.2987	16.1063	14.2691	14.6547	16.6418	17.5164
69	9200	9.68969	10.5945	11.5637	11.7534	10.7509	9.24848	7.93186	6.95558	6.29932	5.9246	5.73118	5.57537	5.41267	5.36431	5.62564	6.41217	7.94413	10.1369	12.4595	14.1404	14.4331	13.7188	12.8082	11.9064
70	9248	15.369	15.4168	14.478	12.8946	11.0949	9.39774	7.96815	6.85333	6.03475	5.47342	5.13925	5.02385	5.14492	5.55021	6.31983	7.55408	9.3267	11.5972	14.1178	16.4071	17.8561	17.9815	16.7151	14.4799
71	9296	4.74726	5.91882	6.98203	7.21284	7.24974	5.80411	4.79204	4.83309	4.84686	5.49849	6.57054	6.33847	6.61216	6.8859	5.99808	5.72606	5.76306	5.83198	6.67299	6.7636	6.70697	8.26189	8.57682	7.91247
