# Supplementary material for: Time-varying asymmetry and tail thickness in long series of daily financial returns
Source: publisher site journal article supplement (doi:10.1515/snde-2017-0071), 2018-10-02
Supplement: Supplementary file 463 [file data1_s&p500__post_expect.xlsx]

## Sheet: 1
	T	log post kernel	Var3	Var4	Var5	Var6	Var7	Var8	Var9	Var10	Var11	Var12	Var13	Var14	Var15	Var16	Var17	Var18	Var19	Var20	Var21	Var22	Var23	Var24	Var25
1	154	-193.056	0.198794	0.240015	0.0714636	3.38494	-0.279389	-0.493309	-1.09637	4.44521	-0.016938	0.385696	2.21584	0.00135969	-0.34654	-0.188334	-0.164652	-0.0918004	-0.0621311	-0.00361986	0.29816	0.365829	0.0684424	-1.54212	-1.34313
2	332	-440.767	0.0943485	1.08535	0.0399064	1.7202	-0.894136	-1.09441	-2.30542	4.29511	0.0337648	-0.10554	2.22089	-0.0540581	-0.418726	-0.0523405	-0.0788049	-0.0848708	-0.133205	0.304772	0.0686629	0.416468	0.149436	-1.54534	-0.421531
3	510	-602.222	0.186836	0.471393	0.0264005	1.14235	-1.38056	1.16636	-4.18427	3.52632	0.0570597	1.61838	2.40243	0.0841833	-1.67256	-0.118678	0.302376	-0.189101	-0.12528	0.307128	-0.102795	0.543832	0.193902	-2.62605	-0.777945
4	688	-763.693	0.285798	0.925425	-0.0495274	-1.51547	-1.52705	0.888434	-4.38511	2.01015	0.133559	1.23586	2.36943	0.0890039	-0.234495	-0.0532776	0.193837	-0.0923278	0.266142	0.11828	0.214785	0.102099	-0.093133	-0.670627	-0.309527
5	866	-905.752	0.274012	0.943849	-0.00734358	-0.964363	-1.35649	0.0434232	-4.12942	2.50186	0.068184	1.28307	2.33475	0.0706773	-0.41965	0.0285281	0.383141	-0.0881323	-0.159052	0.162594	0.138476	0.262689	0.182694	-0.563857	-0.39937
6	1044	-1008.18	0.280215	0.726157	-0.00484915	-1.93823	-1.36722	0.873307	-4.55689	1.3253	0.0660281	0.31504	2.50293	-0.0284033	-0.16484	0.295887	0.280432	0.0203771	-0.0425111	0.00494393	0.246681	0.0822082	0.167517	-0.22216	-0.108994
7	1222	-1149.52	0.319631	1.11065	-0.0390883	-1.63022	-1.42155	0.513114	-4.68321	1.22587	0.147074	1.05317	2.49844	0.0370156	-0.489805	0.141089	0.217668	-0.0287321	-0.133764	0.0189598	0.0287516	0.286127	0.116358	-0.211296	-0.23418
8	1400	-1381.99	0.308196	0.930819	-0.0848274	-1.73426	-1.4619	0.284468	-4.24639	1.65872	0.227616	1.21677	1.70655	0.150639	-0.00394801	0.350513	0.236942	0.0459441	-0.103941	-0.142028	0.225115	-0.0114923	0.197179	-0.410321	-0.0895929
9	1578	-1577.85	0.291442	0.150177	-0.0568959	-1.98051	-1.4955	0.275591	-4.35103	0.956506	0.179965	1.28437	2.066	0.102526	0.230824	0.266688	0.207176	0.0107792	-0.118217	-0.218951	0.193434	-0.0222821	0.146542	-0.100701	0.125875
10	1756	-1796.04	0.298216	0.746201	-0.0451485	-2.03481	-1.00137	0.429732	-4.4953	1.04917	0.13488	1.1845	2.22974	0.0305936	0.0520044	0.206089	0.124359	-0.157891	-0.000558883	-0.199982	0.0441643	0.290293	0.0575492	0.252307	-0.00614447
11	1934	-1917.19	0.326551	0.949581	-0.0586986	-2.35438	-1.03946	0.849754	-4.85217	0.626891	0.142296	1.55285	2.24319	-0.0196635	0.244411	0.180604	0.197904	-0.145604	0.198645	-0.0696535	0.0308913	0.0753052	0.159325	0.205128	-0.30244
12	2112	-2143.33	0.308789	1.25749	-0.0204003	-2.66279	-1.20025	1.1668	-5.07249	0.569465	0.08945	1.00661	2.44475	0.00350814	-0.00282602	0.291955	0.259867	0.254131	0.0186732	0.0274623	0.185204	0.270172	-0.0486002	0.151178	0.0762482
13	2290	-2308.41	0.308341	0.824332	-0.0415576	-2.46204	-1.06754	0.958148	-4.98674	0.381989	0.121395	1.04547	2.60682	0.0225219	0.0417294	0.162056	0.365416	-0.194589	0.423725	-0.0231627	-0.34303	0.21684	0.223928	0.0182229	-0.107031
14	2468	-2488.94	0.314413	0.53204	-0.0283114	-2.44175	-1.06619	0.874152	-5.07204	0.487584	0.110093	1.11631	2.38438	0.0367538	0.270712	-0.0510154	0.27222	0.377296	-0.341718	-0.107139	-0.101078	-0.0199796	0.207257	0.288223	0.0136677
15	2646	-2593.6	0.318701	1.21029	-0.035016	-2.80737	-1.11695	1.01972	-5.28118	-0.441769	0.11626	1.16958	2.3132	0.0296382	0.134649	-0.0113364	0.220615	-0.150641	0.1602	-0.00648078	0.00470879	-0.00221003	-0.0145414	0.251857	0.00586563
16	2824	-2786.63	0.312197	1.75357	-0.0156152	-2.54531	-1.08513	0.952599	-5.13103	0.127561	0.0916767	1.27045	2.28118	0.0257855	-0.187006	0.212216	0.302505	-0.199672	-0.0224669	-0.130565	0.08188	0.227287	-0.0452271	0.355735	-0.302026
17	3002	-2940.86	0.303629	1.53451	-0.0203337	-2.51607	-1.00975	0.885682	-4.89232	0.228049	0.0980041	1.07028	2.4252	0.0139843	-0.0990532	0.216561	0.356696	0.110523	-0.389558	0.0286216	0.168225	0.310787	0.188521	0.183688	0.0206816
18	3180	-3141.64	0.303979	0.363001	-0.0017677	-2.6765	-1.03626	1.04255	-4.71578	0.316873	0.0620748	1.13164	2.29531	0.00302459	-0.0224648	0.227042	0.285936	-0.00449713	-0.0356412	0.24693	-0.150509	-0.0393575	0.49993	0.238804	-0.025154
19	3358	-3261.12	0.292815	1.62432	0.0441867	-2.87139	-1.07302	1.12655	-4.35994	0.0555127	0.00114098	1.17578	2.0621	0.028574	0.123958	0.28519	0.307628	-0.0846962	-0.261049	-0.26974	-0.0243402	-0.0816516	0.134355	0.0490776	-0.204543
20	3536	-3365.85	0.296885	1.11396	0.030314	-3.24092	-1.25068	1.293	-4.35799	-0.151106	0.028091	1.27542	2.10794	0.0303144	0.330308	0.225514	0.182102	-0.102288	-0.0335824	-0.0831884	0.00924561	0.0803137	0.176709	-0.040043	0.306503
21	3714	-3381.22	0.295175	1.39781	0.0383898	-3.39693	-1.31105	1.31034	-4.58017	-0.3988	0.0149016	1.07825	2.3369	0.0113132	0.479398	0.433249	0.177174	0.0453279	0.174715	0.191829	-0.144628	0.101172	0.323948	0.103522	0.0998429
22	3892	-3460.4	0.30739	1.19348	0.031751	-3.41383	-1.28491	1.33313	-4.68317	-0.479826	0.0209033	1.10674	2.24447	0.0322238	0.440943	0.217538	0.159343	0.0981549	0.329997	0.142911	-0.14697	0.391086	-0.02304	0.188365	0.194277
23	4070	-3541.6	0.310931	1.49768	0.0441792	-3.37056	-1.31802	1.38819	-4.65158	-0.734741	0.000925173	1.38454	2.09736	0.047912	0.235673	-0.0887648	-0.175012	-0.0061349	0.0941464	0.0250775	0.058124	0.0665055	0.166112	0.465869	-0.0334895
24	4248	-3742.23	0.325908	1.5141	0.0425333	-3.34421	-1.35186	1.54691	-4.7629	-0.743186	-0.00793732	1.22298	2.54415	0.0276121	-0.0435222	0.226856	-0.23809	-0.0742417	0.285516	0.172301	-0.51321	0.312889	0.0984619	0.127111	0.132521
25	4426	-3932.77	0.322003	1.36824	0.0399453	-3.49509	-1.38061	1.51584	-4.63947	-0.976872	0.00625939	1.24675	2.29365	0.0308999	0.372885	0.0895611	-0.237529	0.0880366	0.324167	0.298283	-0.165779	0.497143	0.136096	0.203403	0.0821498
26	4604	-4089.05	0.317293	1.14339	0.0369842	-3.33232	-1.42256	1.5483	-4.37889	-0.937039	0.00930724	1.4087	2.29272	0.0352101	-0.0798908	-0.221344	-0.179334	0.0993732	0.303451	0.143373	-0.114941	0.624395	-0.0317624	0.47175	-0.0702116
27	4782	-4212.73	0.324236	1.91306	0.0403336	-3.59008	-1.41897	1.51382	-4.18198	-0.728929	0.00177151	1.43924	2.18255	0.0526415	0.421538	0.191235	0.0632619	0.0184127	0.0744453	0.173266	0.174488	-0.0631015	0.231993	0.122063	0.430614
28	4960	-4311.1	0.326723	1.11592	0.0498403	-3.61853	-1.5361	1.65117	-4.46631	-1.19804	-0.0183094	1.49723	2.21453	0.0445212	0.331712	-0.153066	-0.0564091	-0.15037	0.170497	-0.0251246	-0.229665	0.287057	0.16441	0.356185	0.0115203
29	5138	-4550.08	0.331974	1.03538	0.0578073	-3.46656	-1.54665	1.78957	-3.85579	-0.510899	-0.0414269	1.44119	2.14174	0.0404424	-0.454034	-0.0587746	-0.292883	-0.0804187	0.27117	0.140262	-0.265345	0.181254	0.256283	0.559676	0.147909
30	5316	-4705.25	0.340214	1.09311	0.0472874	-3.50924	-1.55294	1.74362	-4.16048	-1.2534	-0.016944	1.61005	2.21232	0.0506605	-0.218039	-0.129538	-0.102114	-0.212382	0.125985	0.114355	-0.234514	0.218759	0.312062	0.497228	-0.247795
31	5494	-4919.15	0.344272	1.73295	0.0514703	-3.60951	-1.57982	1.75619	-4.07179	-0.984867	-0.0222373	1.69315	1.96864	0.0462883	-0.0568154	-0.1067	-0.0258712	-0.220855	0.0855927	0.146315	0.0756922	0.0922442	0.318292	0.42992	-0.124989
32	5672	-5036.8	0.348316	1.52059	0.046312	-3.92163	-1.66208	1.91198	-4.14793	-0.894897	-0.0182919	1.66923	1.99159	0.0460198	0.0828059	-0.204628	-0.0408579	-0.3465	0.0865444	0.020189	-0.0597727	0.127048	0.136507	0.454651	-0.0371036
33	5850	-5207.56	0.350804	1.39137	0.0475672	-3.94822	-1.64385	1.8833	-4.15574	-0.928304	-0.0231013	1.58568	2.10782	0.0466856	0.404121	-0.0530845	-0.0281798	-0.234387	0.242812	0.0642055	-0.10511	-0.0267612	0.30427	0.267451	0.0944467
34	6028	-5478.01	0.343804	1.51339	0.0490646	-3.9608	-1.70677	1.96421	-4.50308	-0.970412	-0.0322703	1.47107	2.2129	0.0279842	0.474375	-0.146424	0.127557	-0.361058	0.264974	0.295292	-0.0989624	0.402104	-0.203846	0.24821	0.196103
35	6206	-5758.69	0.352672	1.39014	0.0562957	-3.98348	-1.72417	2.0519	-4.55059	-1.14176	-0.0492743	1.64758	2.10209	0.0358224	0.0212558	0.161079	-0.334548	-0.464811	-0.00482152	0.0340174	-0.0499105	0.334999	0.0154987	0.446452	-0.0645431
36	6384	-6045.61	0.350012	1.39637	0.0501586	-4.08743	-1.82556	2.13279	-4.48812	-1.36949	-0.0340632	1.65851	2.22764	0.0309169	0.101547	0.0381487	-0.390249	-0.321254	0.0906547	-0.0725606	-0.175374	0.195916	-0.0422308	0.793455	-0.336737
37	6562	-6297.91	0.353572	1.11718	0.048996	-4.16434	-1.87925	2.16296	-4.51911	-1.20449	-0.0260666	1.84709	2.22532	0.0405921	0.0586445	-0.012661	-0.25774	-0.346191	0.256997	0.058209	-0.287384	0.266108	0.0901785	0.597025	-0.280831
38	6740	-6460.62	0.361251	1.50724	0.046666	-4.49277	-1.97593	2.29016	-4.38852	-1.34158	-0.0235079	2.04668	2.18533	0.0625464	0.323626	-0.124169	-0.0889516	-0.535627	0.0932221	0.0205501	-0.430565	0.203578	0.158479	0.300992	-0.0711963
39	6918	-6640.29	0.366098	1.02479	0.0463513	-4.33076	-1.94386	2.212	-4.26058	-1.35073	-0.0286377	1.92758	2.45196	0.0410708	0.256136	-0.218179	-0.180046	-0.634163	0.0708689	0.0124039	-0.422951	0.0319445	0.197572	0.43199	-0.113955
40	7096	-6788.04	0.367931	1.51681	0.0420412	-4.24501	-1.93939	2.15105	-3.92205	-1.35972	-0.0255037	1.83953	2.18232	0.0599467	0.42603	-0.123432	-0.177595	-0.548935	0.0679515	0.104046	-0.240298	0.183282	0.0582719	0.283038	0.00277739
41	7274	-7014.68	0.372051	0.969149	0.0467832	-4.29803	-1.96859	2.16622	-3.95116	-1.36279	-0.0333008	1.81168	2.13787	0.050365	0.583549	0.0762076	0.101263	-0.570693	-0.0381503	0.041594	-0.376779	0.277413	-0.0136127	0.0704328	0.343431
42	7452	-7225.64	0.365057	1.2571	0.0403061	-4.22844	-2.03843	2.23078	-4.60086	-1.16364	-0.0239032	1.85262	2.30924	0.0353203	0.46915	-0.21539	0.270869	-0.818619	-0.316304	0.412868	-0.360748	0.0147235	-0.156051	0.229747	0.222148
43	7630	-7415.52	0.368564	1.19133	0.0389199	-4.48008	-2.04689	2.29894	-4.11831	-1.95783	-0.0181489	1.82385	2.2521	0.0474831	0.541561	0.389098	-0.309402	-0.485216	0.385049	0.254959	-0.33414	0.208079	0.0541996	0.176847	0.422023
44	7808	-7679.07	0.371548	0.885648	0.0510179	-4.38668	-2.05932	2.28708	-4.01287	-1.75183	-0.0352209	1.88218	2.11714	0.0664161	0.0243596	0.135225	-0.202302	-0.408576	0.219105	-0.0119254	-0.38715	0.0490527	0.0867409	0.298908	0.113363
45	7986	-7882.35	0.365429	1.32139	0.0382695	-4.33659	-2.0336	2.25163	-4.04423	-1.65118	-0.0182882	1.91316	2.25581	0.0655442	0.220466	0.0853042	-0.277366	-0.534333	0.0048809	0.114393	-0.276009	0.0926423	-0.246286	0.33439	-0.0421261
46	8164	-8068.74	0.369247	1.02232	0.0396055	-4.2666	-2.06609	2.2692	-4.03199	-1.7432	-0.0227564	1.90622	2.24546	0.0732389	-0.0209642	-0.0131787	-0.311388	-0.49656	0.0425415	0.144207	-0.293398	-0.00384811	-0.350098	0.478243	-0.187909
47	8342	-8340.97	0.373557	1.38155	0.0311025	-4.54649	-2.10449	2.35479	-3.77281	-1.51024	-0.00522935	1.95876	2.1703	0.0746038	0.186779	-0.0299614	-0.194276	-0.516002	0.158884	0.119268	-0.354876	-0.278958	0.177149	0.419755	0.200672
48	8520	-8540.12	0.374742	1.09304	0.0293656	-4.35557	-2.09225	2.29969	-3.76073	-1.60282	-0.00295087	2.00866	2.1076	0.0710562	-0.0592657	-0.00764681	-0.251049	-0.718118	-0.267396	0.0726888	-0.355407	-0.0166628	-0.161386	0.369404	-0.00396548
49	8698	-8747.55	0.372991	1.23076	0.0326336	-4.22137	-2.08573	2.25737	-3.69359	-1.76189	-0.00742347	2.082	2.08477	0.0791272	-0.241377	-0.223469	-0.155655	-0.614006	0.153034	0.0253934	-0.243913	-0.0760714	0.169973	0.562307	-0.250888
50	8876	-8902.87	0.36848	0.61887	0.029969	-4.35945	-2.12903	2.31663	-3.76328	-1.85044	-0.000860997	2.09695	1.95814	0.0789599	-0.0604516	-0.25842	-0.0987955	-0.547745	0.0621368	-0.0743249	-0.136342	-0.106562	0.0845876	0.592052	-0.0647596
51	9054	-9086.11	0.368076	1.09645	0.0314286	-4.3488	-2.1223	2.30222	-3.69335	-1.7859	-0.00305197	1.991	2.02601	0.0572331	-0.0491058	-0.0979986	-0.21925	-0.632893	-0.123312	-0.126168	-0.203291	-0.0736088	0.321469	0.606945	-0.19468
52	9232	-9315.11	0.365965	0.951757	0.0269348	-4.38439	-2.16261	2.34902	-3.72596	-1.85594	0.00267523	2.00957	2.01521	0.0613695	0.0225689	-0.0716837	-0.271701	-0.727302	-0.182862	-0.0216209	-0.265997	-0.0565175	0.333567	0.528426	-0.0938811
53	9410	-9521.54	0.364443	0.529434	0.0218735	-4.581	-2.17389	2.41542	-3.70507	-1.07892	0.0157679	1.9434	2.0291	0.0620366	-0.156871	-0.302548	0.252956	-0.527949	0.0227733	0.143366	-0.154906	-0.156494	0.145148	0.608413	-0.0138631
54	9430	-9528.28	0.362437	1.34444	0.0236523	-4.19485	-2.12672	2.26414	-3.68594	-1.80721	0.0124282	1.92394	1.95437	0.0509734	-0.178281	0.0184505	-0.284373	-0.543756	0.100818	-0.171478	-0.1233	-0.1295	0.273849	0.595199	-0.242679
55	8528	-8548.08	0.372471	1.11073	0.0329939	-4.41587	-2.06308	2.29032	-3.76411	-1.45081	-0.00980365	1.9281	2.13089	0.0752132	0.121202	-0.227591	0.117513	-0.450238	0.312181	0.0330996	-0.413126	-0.137517	0.158145	0.492458	0.00787765
56	8576	-8610.37	0.371823	1.16539	0.0330559	-4.43491	-2.10989	2.32322	-3.75283	-1.49972	-0.00860746	2.01232	2.19024	0.0771863	-0.0560842	-0.106002	-0.227625	-0.586419	0.0147153	0.0581587	-0.365261	0.01593	-0.056483	0.484507	-0.100013
57	8624	-8686.56	0.368714	1.43301	0.0328669	-4.37182	-2.09746	2.32828	-3.82751	-1.66539	-0.0083277	2.0616	2.15453	0.0723331	-0.173825	-0.0365907	-0.234036	-0.613623	0.0454394	-0.108186	-0.351804	0.0837539	-0.132938	0.330018	0.0494028
58	8672	-8709.98	0.372108	0.831789	0.0312358	-4.44694	-2.08665	2.31618	-3.74162	-1.79973	-0.00974888	2.05099	2.18268	0.0729516	-0.0139609	-0.0459359	-0.167329	-0.726674	-0.145362	-0.0169538	-0.414506	-0.0393322	-0.0965592	0.427693	0.00536764
59	8720	-8766.99	0.370926	1.1516	0.0338947	-4.33509	-2.12963	2.30506	-3.67479	-1.6141	-0.00957221	2.07073	2.0619	0.0686668	-0.0864233	-0.203846	-0.167498	-0.743053	-0.260079	-0.133586	-0.325439	0.0302733	0.0136325	0.583931	-0.179921
60	8768	-8817	0.369705	0.741294	0.0304643	-4.29829	-2.12414	2.29654	-3.65438	-1.57546	-0.00546943	2.08574	2.11522	0.069209	-0.193902	-0.115239	-0.20415	-0.846391	-0.256507	0.0410538	-0.262612	0.0592935	-0.0870211	0.527055	-0.227143
61	8816	-8860.11	0.370715	0.79116	0.0276422	-4.29629	-2.10714	2.2876	-3.70063	-1.7227	0.00128779	2.03426	2.0276	0.0625278	-0.0973777	-0.136918	-0.260268	-0.825066	-0.359272	0.0377927	-0.235989	0.21828	0.153407	0.547636	-0.186073
62	8864	-8905.34	0.364416	1.09057	0.0353842	-4.35988	-2.11325	2.30507	-3.7219	-1.5782	-0.00946559	2.12946	2.0549	0.0688668	-0.138894	-0.051745	-0.24857	-0.617661	0.0864469	-0.265126	-0.117844	0.0276531	0.159741	0.495375	-0.151743
63	8912	-8933.56	0.370311	1.24745	0.0284131	-4.34068	-2.12978	2.31523	-3.78976	-1.6908	0.00218285	2.12049	1.96762	0.0758974	-0.0671381	-0.154118	-0.264808	-0.580587	-0.0123409	-0.253058	-0.121227	-0.143887	0.213849	0.577096	-0.168052
64	8960	-9011.28	0.365275	0.887381	0.0307895	-4.36405	-2.12529	2.32274	-3.78282	-1.6417	-0.00405823	2.0114	2.0453	0.0668386	-0.070233	-0.0772743	-0.27711	-0.617536	0.0272337	-0.0607179	-0.183772	-0.17162	0.303366	0.538927	-0.148071
65	9008	-9020.2	0.365159	1.31325	0.0299217	-4.35369	-2.11254	2.30389	-3.72371	-1.60257	-0.0018863	2.04175	2.01128	0.0657516	-0.0616478	-0.0259395	-0.282383	-0.702148	-0.13585	-0.116446	-0.186764	-0.069972	0.343937	0.45842	-0.0890267
66	9056	-9108.49	0.366661	1.06545	0.0271243	-4.39438	-2.13535	2.32779	-3.71626	-1.6818	0.00449004	2.01343	2.02062	0.0632711	-0.130689	-0.0448324	-0.249737	-0.628165	-0.0235987	-0.174198	-0.168489	-0.0687803	0.206255	0.433895	-0.0520065
67	9104	-9155.15	0.366673	0.882963	0.032456	-4.35517	-2.14371	2.31796	-3.72356	-1.82688	-0.00399123	2.02097	2.01267	0.0663755	-0.0210025	-0.148609	-0.275991	-0.597264	0.0230701	-0.153261	-0.194405	0.0516956	0.120494	0.557737	-0.121293
68	9152	-9210.03	0.369088	1.20845	0.0267671	-4.36748	-2.15575	2.34089	-3.84048	-1.84066	0.00637863	2.15658	2.0187	0.0760887	-0.0987976	-0.165066	-0.215827	-0.572388	0.0848575	-0.295585	-0.0814474	-0.0928279	0.158329	0.576167	-0.162006
69	9200	-9264.93	0.366056	1.24385	0.0243893	-4.66358	-2.17704	2.4235	-3.69939	-1.25339	0.0101833	1.96134	1.9833	0.0653344	-0.0834404	-0.00153965	-0.0303372	-0.605193	-0.00756378	-0.0563172	-0.177354	0.00628452	0.257941	0.343618	0.145924
70	9248	-9286.56	0.364216	1.03388	0.0303626	-4.23743	-2.15326	2.30748	-3.79621	-1.48307	-0.00127427	1.9894	2.07385	0.0560123	-0.216733	-0.0237931	-0.323726	-0.5468	0.0387627	-0.0349591	-0.156163	-0.0281515	0.19371	0.583827	-0.245964
71	9296	-9407.86	0.368584	1.10382	0.0261009	-4.46768	-2.12949	2.35109	-3.79215	-2.09741	0.00831059	2.06594	1.80775	0.0784773	0.105777	-0.179443	-0.148831	-0.541687	-0.0702168	0.00246998	-0.201331	0.226186	0.0915589	0.296912	0.272337
