# Supplementary material for: Time-varying asymmetry and tail thickness in long series of daily financial returns
Source: publisher site journal article supplement (doi:10.1515/snde-2017-0071), 2018-10-02
Supplement: Supplementary file 465 [file data1_s&p500__post_mode.xlsx]

## Sheet: 1
	T	log post kernel	Var3	Var4	Var5	Var6	Var7	Var8	Var9	Var10	Var11	Var12	Var13	Var14	Var15	Var16	Var17	Var18	Var19	Var20	Var21	Var22	Var23	Var24	Var25
1	154	-249.681	0.305971	-0.510479	-0.00640806	-4.66455	-1.871	2.32339	-4.91248	-1.76172	0.0173409	1.33063	1.67038	0.163943	-0.0993015	-0.224186	-0.201317	-0.886893	1.39058	-0.881022	0.361138	-0.516529	-0.278731	0.867986	0.456349
2	332	-475.482	0.283122	-0.452706	0.0199372	-4.36053	-2.09782	2.29272	-4.93407	-1.51304	-0.0017955	1.50221	1.65647	0.0279759	-0.117088	-0.260025	-0.149112	-1.09165	1.38869	-1.03801	-0.0205551	-0.371832	-0.33347	0.955321	0.360897
3	510	-644.237	0.283122	-0.452706	0.0199372	-4.36053	-2.09782	2.29272	-4.93407	-1.51304	-0.0017955	1.50221	1.65647	0.0279759	-0.117088	-0.260025	-0.149112	-1.09165	1.38869	-1.03801	-0.0205551	-0.371832	-0.33347	0.955321	0.360897
4	688	-764.494	0.283122	-0.452706	0.0199372	-4.36053	-2.09782	2.29272	-4.93407	-1.51304	-0.0017955	1.50221	1.65647	0.0279759	-0.117088	-0.260025	-0.149112	-1.09165	1.38869	-1.03801	-0.0205551	-0.371832	-0.33347	0.955321	0.360897
5	866	-917.512	0.301777	-0.970669	0.0216245	-4.40111	-1.97039	2.31672	-4.94725	-1.71783	0.00655147	1.53668	1.53864	0.0608001	0.0324777	-0.0551746	-0.274232	-0.688335	1.48152	-1.17365	0.184834	-0.40545	-0.379034	1.07563	0.140765
6	1044	-1044.82	0.295862	-1.13104	0.0156526	-4.38208	-2.01218	2.28819	-5.08633	-1.58794	0.0132631	1.57461	1.53238	0.057572	0.0258859	-0.0672977	-0.284698	-0.680318	1.48895	-1.16283	0.142158	-0.37256	-0.421169	1.08104	0.143644
7	1222	-1192.55	0.288123	0.734092	0.0340052	-4.70475	-2.16394	2.53767	-4.48228	-0.277881	-0.0103242	1.32326	1.49198	0.0158508	0.0731455	-0.146986	-0.482145	-0.4781	1.43673	-1.16525	-0.119145	-0.18298	-0.419706	0.991199	0.164319
8	1400	-1414.45	0.290799	0.819617	0.0340956	-4.70064	-2.12148	2.58622	-4.33531	-0.544878	-0.0179927	1.30354	1.35923	0.0236703	0.0741871	-0.146839	-0.485952	-0.597123	1.4921	-1.16513	-0.111763	-0.211905	-0.382338	0.999056	0.169307
9	1578	-1631.32	0.293383	0.95969	0.0334714	-4.73258	-2.14928	2.61356	-4.42143	-0.486719	-0.0145263	1.32653	1.3618	0.0288442	0.0412521	-0.142441	-0.483009	-0.613838	1.51132	-1.13299	-0.0902488	-0.194043	-0.387819	1.02357	0.167378
10	1756	-1843.22	0.294194	2.32277	0.0408884	-4.80921	-2.07637	2.62158	-4.43667	-0.683074	-0.0262112	1.28647	1.40342	0.040455	0.0347049	-0.143362	-0.475823	-0.498942	1.58405	-1.15728	-0.0186662	-0.147226	-0.378563	1.02803	0.161621
11	1934	-1994.15	0.293101	2.42577	0.0439743	-4.80876	-2.06142	2.62215	-4.43146	-0.678805	-0.0280436	1.29684	1.38866	0.0392197	0.00648062	-0.155311	-0.481768	-0.47844	1.58674	-1.19665	-0.124455	-0.312182	-0.147463	1.08085	0.149704
12	2112	-2193.57	0.290137	2.42687	0.0432692	-4.80842	-2.0661	2.62813	-4.42951	-0.676964	-0.0277062	1.29612	1.38557	0.0392121	-0.0591052	-0.11401	-0.504876	-0.401434	1.39648	-1.15342	-0.0978389	-0.420268	-0.0804139	1.06126	0.169318
13	2290	-2356.15	0.290136	2.42862	0.0446457	-4.80916	-2.06336	2.62326	-4.42616	-0.67844	-0.0267647	1.29473	1.38172	0.0362607	-0.00197158	-0.356288	-0.469917	-0.337263	1.41881	-1.07439	-0.28544	-0.527177	-0.27994	1.16413	0.197117
14	2468	-2517	0.290136	2.42862	0.0446457	-4.80916	-2.06336	2.62326	-4.42616	-0.67844	-0.0267647	1.29473	1.38172	0.0362607	-0.00197158	-0.356288	-0.469917	-0.337263	1.41881	-1.07439	-0.28544	-0.527177	-0.27994	1.16413	0.197117
15	2646	-2664.33	0.289025	2.56838	0.0502242	-4.79674	-2.00299	2.59937	-4.39482	-0.654453	-0.0416411	1.23838	1.40939	0.032522	-0.00320743	-0.35443	-0.469026	-0.330316	1.41772	-1.07296	-0.283644	-0.52354	-0.277775	1.15836	0.199243
16	2824	-2836.05	0.288949	2.57327	0.0503107	-4.79071	-1.9991	2.59435	-4.3873	-0.656887	-0.0419183	1.23398	1.40888	0.0315145	-0.00753324	-0.353199	-0.468057	-0.295013	1.40963	-1.07045	-0.266333	-0.514272	-0.264484	1.159	0.192535
17	3002	-3000.46	0.288949	2.57327	0.0503107	-4.79071	-1.9991	2.59435	-4.3873	-0.656887	-0.0419183	1.23398	1.40888	0.0315145	-0.00753324	-0.353199	-0.468057	-0.295013	1.40963	-1.07045	-0.266333	-0.514272	-0.264484	1.159	0.192535
18	3180	-3203.98	0.2893	2.53873	0.0499629	-4.79612	-1.99229	2.59812	-4.39465	-0.648527	-0.0415235	1.29147	1.39198	0.036899	0.0104816	-0.348019	-0.473952	-0.310432	1.38053	-1.02749	-0.307305	-0.530378	-0.224923	1.14859	0.208715
19	3358	-3332.53	0.2893	2.53873	0.0499629	-4.79612	-1.99229	2.59812	-4.39465	-0.648527	-0.0415235	1.29147	1.39198	0.036899	0.0104816	-0.348019	-0.473952	-0.310432	1.38053	-1.02749	-0.307305	-0.530378	-0.224923	1.14859	0.208715
20	3536	-3424.44	0.2893	2.53873	0.0499629	-4.79612	-1.99229	2.59812	-4.39465	-0.648527	-0.0415235	1.29147	1.39198	0.036899	0.0104816	-0.348019	-0.473952	-0.310432	1.38053	-1.02749	-0.307305	-0.530378	-0.224923	1.14859	0.208715
21	3714	-3468.14	0.2893	2.53873	0.0499629	-4.79612	-1.99229	2.59812	-4.39465	-0.648527	-0.0415235	1.29147	1.39198	0.036899	0.0104816	-0.348019	-0.473952	-0.310432	1.38053	-1.02749	-0.307305	-0.530378	-0.224923	1.14859	0.208715
22	3892	-3550.9	0.291353	2.53173	0.0490703	-4.8309	-1.99733	2.61217	-4.57376	-0.83419	-0.0390101	1.22511	1.39782	0.0355322	0.00601164	-0.354768	-0.483951	-0.328767	1.38701	-1.03738	-0.25348	-0.540292	-0.248257	1.15135	0.217053
23	4070	-3614.36	0.291353	2.53173	0.0490703	-4.8309	-1.99733	2.61217	-4.57376	-0.83419	-0.0390101	1.22511	1.39782	0.0355322	0.00601164	-0.354768	-0.483951	-0.328767	1.38701	-1.03738	-0.25348	-0.540292	-0.248257	1.15135	0.217053
24	4248	-3794.42	0.291343	2.63261	0.048968	-4.80766	-1.96759	2.59066	-4.45322	-1.27514	-0.040161	1.16745	1.39681	0.0258416	0.0974772	-0.426885	-0.488478	-0.272644	1.39853	-1.06275	-0.31568	-0.536456	-0.210004	1.1867	0.183891
25	4426	-3941.12	0.291343	2.63261	0.048968	-4.80766	-1.96759	2.59066	-4.45322	-1.27514	-0.040161	1.16745	1.39681	0.0258416	0.0974772	-0.426885	-0.488478	-0.272644	1.39853	-1.06275	-0.31568	-0.536456	-0.210004	1.1867	0.183891
26	4604	-4105.3	0.291343	2.63261	0.048968	-4.80766	-1.96759	2.59066	-4.45322	-1.27514	-0.040161	1.16745	1.39681	0.0258416	0.0974772	-0.426885	-0.488478	-0.272644	1.39853	-1.06275	-0.31568	-0.536456	-0.210004	1.1867	0.183891
27	4782	-4223.19	0.293514	1.73576	0.0470625	-4.81219	-1.97828	2.60035	-4.4587	-1.16086	-0.0363402	1.13901	1.39943	0.0202344	0.109737	-0.416312	-0.486875	-0.184101	1.33988	-1.08555	-0.242514	-0.521339	-0.193001	1.1555	0.201046
28	4960	-4386.1	0.293176	1.74115	0.0476559	-4.81274	-1.9787	2.60227	-4.46257	-1.14628	-0.0371882	1.13802	1.3977	0.0206193	0.110226	-0.416177	-0.486571	-0.182147	1.33616	-1.08386	-0.237887	-0.524292	-0.191504	1.15516	0.205541
29	5138	-4618.69	0.292994	1.67773	0.0473933	-4.81369	-1.98105	2.60487	-4.47887	-1.14498	-0.0369546	1.13888	1.3981	0.020727	0.104214	-0.415107	-0.487753	-0.181407	1.33519	-1.08093	-0.238999	-0.521285	-0.195035	1.16182	0.198334
30	5316	-4788.44	0.292646	1.7308	0.0471506	-4.8171	-1.98713	2.60876	-4.46774	-1.14781	-0.0355523	1.13616	1.39326	0.0202132	0.107646	-0.432513	-0.476214	-0.168633	1.3266	-1.08042	-0.248001	-0.509268	-0.184578	1.17831	0.19556
31	5494	-4968.47	0.292646	1.7308	0.0471506	-4.8171	-1.98713	2.60876	-4.46774	-1.14781	-0.0355523	1.13616	1.39326	0.0202132	0.107646	-0.432513	-0.476214	-0.168633	1.3266	-1.08042	-0.248001	-0.509268	-0.184578	1.17831	0.19556
32	5672	-5104.16	0.292775	1.72471	0.0480045	-4.81761	-1.99088	2.6084	-4.47099	-1.15336	-0.0312373	1.12944	1.39603	0.0208243	0.0650485	-0.415515	-0.527656	-0.0903421	1.42934	-1.12471	-0.219909	-0.445648	-0.0580066	1.21294	0.138026
33	5850	-5279.69	0.292037	1.55089	0.0495975	-4.82699	-1.97729	2.60249	-4.43467	-1.14109	-0.0331257	1.1204	1.41717	0.0190396	0.0944262	-0.426188	-0.516846	-0.156065	1.49835	-1.1245	-0.171647	-0.295492	-0.0792714	1.1576	0.199928
34	6028	-5527.99	0.292769	1.6102	0.0489693	-4.82323	-1.96986	2.59769	-4.41126	-1.14068	-0.0323291	1.12171	1.41945	0.0198801	0.0903645	-0.42809	-0.522374	-0.138863	1.51955	-1.1292	-0.178171	-0.293273	-0.0776379	1.16945	0.188396
35	6206	-5819.53	0.292769	1.6102	0.0489693	-4.82323	-1.96986	2.59769	-4.41126	-1.14068	-0.0323291	1.12171	1.41945	0.0198801	0.0903645	-0.42809	-0.522374	-0.138863	1.51955	-1.1292	-0.178171	-0.293273	-0.0776379	1.16945	0.188396
36	6384	-6118.65	0.292969	1.66912	0.0493806	-4.82184	-1.96828	2.59634	-4.40627	-1.15433	-0.0329142	1.12899	1.41899	0.0202716	0.0899944	-0.44724	-0.522876	-0.133031	1.51516	-1.12643	-0.178229	-0.306933	-0.0788977	1.18875	0.175566
37	6562	-6350.45	0.292969	1.66912	0.0493806	-4.82184	-1.96828	2.59634	-4.40627	-1.15433	-0.0329142	1.12899	1.41899	0.0202716	0.0899944	-0.44724	-0.522876	-0.133031	1.51516	-1.12643	-0.178229	-0.306933	-0.0788977	1.18875	0.175566
38	6740	-6522.72	0.292969	1.66912	0.0493806	-4.82184	-1.96828	2.59634	-4.40627	-1.15433	-0.0329142	1.12899	1.41899	0.0202716	0.0899944	-0.44724	-0.522876	-0.133031	1.51516	-1.12643	-0.178229	-0.306933	-0.0788977	1.18875	0.175566
39	6918	-6662.43	0.292969	1.66912	0.0493806	-4.82184	-1.96828	2.59634	-4.40627	-1.15433	-0.0329142	1.12899	1.41899	0.0202716	0.0899944	-0.44724	-0.522876	-0.133031	1.51516	-1.12643	-0.178229	-0.306933	-0.0788977	1.18875	0.175566
40	7096	-6834.86	0.292573	1.77742	0.0497311	-4.82074	-1.97118	2.59515	-4.40049	-1.12157	-0.0325405	1.13739	1.39688	0.0205994	0.0898361	-0.464894	-0.512122	-0.134429	1.52123	-1.14145	-0.20407	-0.298388	-0.0683729	1.19767	0.176921
41	7274	-7051.94	0.292573	1.77742	0.0497311	-4.82074	-1.97118	2.59515	-4.40049	-1.12157	-0.0325405	1.13739	1.39688	0.0205994	0.0898361	-0.464894	-0.512122	-0.134429	1.52123	-1.14145	-0.20407	-0.298388	-0.0683729	1.19767	0.176921
42	7452	-7216.32	0.291948	1.19646	0.0495049	-4.85901	-1.98214	2.58878	-4.16206	-1.08106	-0.0281106	1.26038	1.33556	0.049423	0.113664	-0.473501	-0.53346	-0.191241	1.5259	-1.17492	-0.232282	-0.29102	-0.12615	1.15975	-0.0343031
43	7630	-7460.63	0.291948	1.19646	0.0495049	-4.85901	-1.98214	2.58878	-4.16206	-1.08106	-0.0281106	1.26038	1.33556	0.049423	0.113664	-0.473501	-0.53346	-0.191241	1.5259	-1.17492	-0.232282	-0.29102	-0.12615	1.15975	-0.0343031
44	7808	-7721.86	0.291948	1.19646	0.0495049	-4.85901	-1.98214	2.58878	-4.16206	-1.08106	-0.0281106	1.26038	1.33556	0.049423	0.113664	-0.473501	-0.53346	-0.191241	1.5259	-1.17492	-0.232282	-0.29102	-0.12615	1.15975	-0.0343031
45	7986	-7923.91	0.291948	1.19646	0.0495049	-4.85901	-1.98214	2.58878	-4.16206	-1.08106	-0.0281106	1.26038	1.33556	0.049423	0.113664	-0.473501	-0.53346	-0.191241	1.5259	-1.17492	-0.232282	-0.29102	-0.12615	1.15975	-0.0343031
46	8164	-8138.79	0.293246	1.33636	0.0510102	-4.86321	-1.9804	2.59144	-4.17303	-1.13997	-0.0320292	1.26073	1.32815	0.0517719	0.098887	-0.437873	-0.529823	-0.186725	1.51404	-1.14131	-0.198788	-0.275021	-0.129973	1.15571	-0.0396245
47	8342	-8418.18	0.293246	1.33636	0.0510102	-4.86321	-1.9804	2.59144	-4.17303	-1.13997	-0.0320292	1.26073	1.32815	0.0517719	0.098887	-0.437873	-0.529823	-0.186725	1.51404	-1.14131	-0.198788	-0.275021	-0.129973	1.15571	-0.0396245
48	8520	-8616.19	0.293246	1.33636	0.0510102	-4.86321	-1.9804	2.59144	-4.17303	-1.13997	-0.0320292	1.26073	1.32815	0.0517719	0.098887	-0.437873	-0.529823	-0.186725	1.51404	-1.14131	-0.198788	-0.275021	-0.129973	1.15571	-0.0396245
49	8698	-8818.28	0.293246	1.33636	0.0510102	-4.86321	-1.9804	2.59144	-4.17303	-1.13997	-0.0320292	1.26073	1.32815	0.0517719	0.098887	-0.437873	-0.529823	-0.186725	1.51404	-1.14131	-0.198788	-0.275021	-0.129973	1.15571	-0.0396245
50	8876	-8987.66	0.29329	1.26748	0.049281	-4.8579	-1.97528	2.5926	-4.21219	-1.17573	-0.0305543	1.28596	1.3438	0.053142	0.11843	-0.444724	-0.518654	-0.173663	1.52287	-1.14255	-0.189425	-0.29259	-0.147316	1.15557	-0.0177808
51	9054	-9150.69	0.292584	1.23967	0.0525069	-4.79298	-2.10786	2.63036	-4.17889	-1.17964	-0.0366743	1.24501	1.33976	0.0459357	0.127884	-0.434713	-0.516247	-0.153597	1.52609	-1.16906	-0.156965	-0.263452	-0.205422	1.155	-0.0191358
52	9232	-9360.78	0.294242	1.24448	0.0549683	-4.7951	-2.10599	2.63087	-4.17785	-1.18	-0.0348689	1.24133	1.33988	0.0462501	0.135141	-0.411675	-0.508593	-0.117514	1.50461	-1.19485	-0.172728	-0.267322	-0.215286	1.15373	-0.000800571
53	9410	-9588.59	0.294242	1.24448	0.0549683	-4.7951	-2.10599	2.63087	-4.17785	-1.18	-0.0348689	1.24133	1.33988	0.0462501	0.135141	-0.411675	-0.508593	-0.117514	1.50461	-1.19485	-0.172728	-0.267322	-0.215286	1.15373	-0.000800571
54	9430	-9604.33	0.294242	1.24448	0.0549683	-4.7951	-2.10599	2.63087	-4.17785	-1.18	-0.0348689	1.24133	1.33988	0.0462501	0.135141	-0.411675	-0.508593	-0.117514	1.50461	-1.19485	-0.172728	-0.267322	-0.215286	1.15373	-0.000800571
55	8528	-8615.7	0.294242	1.24448	0.0549683	-4.7951	-2.10599	2.63087	-4.17785	-1.18	-0.0348689	1.24133	1.33988	0.0462501	0.135141	-0.411675	-0.508593	-0.117514	1.50461	-1.19485	-0.172728	-0.267322	-0.215286	1.15373	-0.000800571
56	8576	-8666.95	0.294242	1.24448	0.0549683	-4.7951	-2.10599	2.63087	-4.17785	-1.18	-0.0348689	1.24133	1.33988	0.0462501	0.135141	-0.411675	-0.508593	-0.117514	1.50461	-1.19485	-0.172728	-0.267322	-0.215286	1.15373	-0.000800571
57	8624	-8720.03	0.294242	1.24448	0.0549683	-4.7951	-2.10599	2.63087	-4.17785	-1.18	-0.0348689	1.24133	1.33988	0.0462501	0.135141	-0.411675	-0.508593	-0.117514	1.50461	-1.19485	-0.172728	-0.267322	-0.215286	1.15373	-0.000800571
58	8672	-8768.79	0.294242	1.24448	0.0549683	-4.7951	-2.10599	2.63087	-4.17785	-1.18	-0.0348689	1.24133	1.33988	0.0462501	0.135141	-0.411675	-0.508593	-0.117514	1.50461	-1.19485	-0.172728	-0.267322	-0.215286	1.15373	-0.000800571
59	8720	-8834.18	0.29432	1.29492	0.0546227	-4.78054	-2.09854	2.62239	-4.17249	-1.19128	-0.0345263	1.23836	1.34325	0.0459801	0.113822	-0.408727	-0.524	-0.11586	1.45674	-1.19824	-0.15812	-0.271372	-0.213548	1.14535	-0.00224137
60	8768	-8885.98	0.29432	1.29492	0.0546227	-4.78054	-2.09854	2.62239	-4.17249	-1.19128	-0.0345263	1.23836	1.34325	0.0459801	0.113822	-0.408727	-0.524	-0.11586	1.45674	-1.19824	-0.15812	-0.271372	-0.213548	1.14535	-0.00224137
61	8816	-8928.64	0.29432	1.29492	0.0546227	-4.78054	-2.09854	2.62239	-4.17249	-1.19128	-0.0345263	1.23836	1.34325	0.0459801	0.113822	-0.408727	-0.524	-0.11586	1.45674	-1.19824	-0.15812	-0.271372	-0.213548	1.14535	-0.00224137
62	8864	-8971.24	0.29432	1.29492	0.0546227	-4.78054	-2.09854	2.62239	-4.17249	-1.19128	-0.0345263	1.23836	1.34325	0.0459801	0.113822	-0.408727	-0.524	-0.11586	1.45674	-1.19824	-0.15812	-0.271372	-0.213548	1.14535	-0.00224137
63	8912	-9012.6	0.29432	1.29492	0.0546227	-4.78054	-2.09854	2.62239	-4.17249	-1.19128	-0.0345263	1.23836	1.34325	0.0459801	0.113822	-0.408727	-0.524	-0.11586	1.45674	-1.19824	-0.15812	-0.271372	-0.213548	1.14535	-0.00224137
64	8960	-9046.14	0.29432	1.29492	0.0546227	-4.78054	-2.09854	2.62239	-4.17249	-1.19128	-0.0345263	1.23836	1.34325	0.0459801	0.113822	-0.408727	-0.524	-0.11586	1.45674	-1.19824	-0.15812	-0.271372	-0.213548	1.14535	-0.00224137
65	9008	-9087.64	0.294582	1.28657	0.0547008	-4.77874	-2.09733	2.62088	-4.17302	-1.18372	-0.0347577	1.24203	1.33822	0.0441525	0.151359	-0.412154	-0.524481	-0.133539	1.43295	-1.19156	-0.167941	-0.267475	-0.236073	1.10087	0.0631286
66	9056	-9143.45	0.294582	1.28657	0.0547008	-4.77874	-2.09733	2.62088	-4.17302	-1.18372	-0.0347577	1.24203	1.33822	0.0441525	0.151359	-0.412154	-0.524481	-0.133539	1.43295	-1.19156	-0.167941	-0.267475	-0.236073	1.10087	0.0631286
67	9104	-9198.35	0.295049	1.30847	0.0550369	-4.77592	-2.10245	2.62253	-4.17664	-1.20876	-0.0356084	1.22798	1.34516	0.0424831	0.151485	-0.413178	-0.525051	-0.13276	1.43691	-1.19614	-0.165759	-0.265749	-0.234698	1.10032	0.0612533
68	9152	-9258.76	0.295049	1.30847	0.0550369	-4.77592	-2.10245	2.62253	-4.17664	-1.20876	-0.0356084	1.22798	1.34516	0.0424831	0.151485	-0.413178	-0.525051	-0.13276	1.43691	-1.19614	-0.165759	-0.265749	-0.234698	1.10032	0.0612533
69	9200	-9312.53	0.295049	1.30847	0.0550369	-4.77592	-2.10245	2.62253	-4.17664	-1.20876	-0.0356084	1.22798	1.34516	0.0424831	0.151485	-0.413178	-0.525051	-0.13276	1.43691	-1.19614	-0.165759	-0.265749	-0.234698	1.10032	0.0612533
70	9248	-9373.42	0.295049	1.30847	0.0550369	-4.77592	-2.10245	2.62253	-4.17664	-1.20876	-0.0356084	1.22798	1.34516	0.0424831	0.151485	-0.413178	-0.525051	-0.13276	1.43691	-1.19614	-0.165759	-0.265749	-0.234698	1.10032	0.0612533
71	9296	-9427.5	0.295049	1.30847	0.0550369	-4.77592	-2.10245	2.62253	-4.17664	-1.20876	-0.0356084	1.22798	1.34516	0.0424831	0.151485	-0.413178	-0.525051	-0.13276	1.43691	-1.19614	-0.165759	-0.265749	-0.234698	1.10032	0.0612533
