# Supplementary material for: Time-varying asymmetry and tail thickness in long series of daily financial returns
Source: publisher site journal article supplement (doi:10.1515/snde-2017-0071), 2018-10-02
Supplement: Supplementary file 471 [file l_1.xlsx]

## Sheet: 1
	Var1	Var2	Var3	Var4	Var5	Var6	Var7	Var8	Var9	Var10	Var11	Var12	Var13	Var14	Var15	Var16	Var17	Var18	Var19	Var20	Var21	Var22	Var23	Var24	Var25
1	2.54402e-05	9.72534e-06	1.54109e-05	1.44131e-05	2.25103e-05	8.0783e-06	1.2216e-05	1.69781e-05	1.21419e-05	1.44131e-05	6.46264e-05	1.69781e-05	1.16478e-05	1.24436e-05	1.51774e-05	1.96414e-05	2.00342e-05	2.17763e-05	1.34458e-05	2.1313e-05	1.838e-05	1.92636e-05	3.13034e-05	2.90351e-05	2.86203e-05
2	-10.6178	-10.5505	-10.4665	-10.3993	-10.3423	-10.258	-10.155	-10.0845	-10.0138	-9.93775	-9.89525	-9.858	-9.7855	-9.70225	-9.629	-9.5705	-9.52	-9.472	-9.41175	-9.351	-9.30025	-9.247	-9.205	-9.17175	-9.1335
3	4	5	5	5	5	5	5	5	5	5	5	5	5	5	5	5	5	5	5	5	5	5	5	5	6
4	-10.6335	-10.602	-10.499	-10.434	-10.3645	-10.32	-10.196	-10.114	-10.055	-9.9725	-9.903	-9.8875	-9.8285	-9.7425	-9.662	-9.596	-9.545	-9.495	-9.449	-9.3745	-9.3275	-9.273	-9.221	-9.189	-9.1545
