# Supplementary material for: Time-varying asymmetry and tail thickness in long series of daily financial returns
Source: publisher site journal article supplement (doi:10.1515/snde-2017-0071), 2018-10-02
Supplement: Supplementary file 473 [file l_2.xlsx]

## Sheet: 1
	Var1	Var2	Var3	Var4	Var5	Var6	Var7	Var8	Var9	Var10	Var11	Var12	Var13	Var14	Var15	Var16	Var17	Var18	Var19	Var20	Var21	Var22	Var23	Var24	Var25
1	3.4136e-10	5.99876e-09	7.21267e-09	2.47228e-08	3.4102e-08	5.8886e-08	1.3535e-07	1.19513e-07	9.01504e-08	1.25117e-07	1.89412e-07	1.45146e-07	3.25965e-07	1.01496e-07	1.55047e-07	1.26585e-07	1.44683e-07	1.66188e-07	4.71739e-07	3.76935e-07	4.53548e-07	6.91875e-07	4.30278e-07	7.10313e-07	4.32815e-07
2	-1774.58	-517.3	-364.366	-274.667	-239.721	-216.528	-204.322	-196.431	-186.684	-177.126	-170.478	-164.383	-159.396	-152.925	-144.76	-137.573	-130.154	-123.679	-119.603	-117.213	-114.78	-112.952	-111.064	-109.194	-107.332
3	4	5	5	5	5	5	5	5	5	5	5	5	5	5	5	5	5	5	5	5	5	5	5	5	5
4	-2948.37	-600.793	-433.807	-294.925	-254.408	-225.034	-208.023	-200.622	-192.24	-181.129	-173.123	-167.834	-160.933	-157.86	-147.99	-141.529	-133.616	-126.693	-120.665	-118.542	-115.884	-113.675	-112.228	-109.9	-108.489
