# Supplementary material for: Time-varying asymmetry and tail thickness in long series of daily financial returns
Source: publisher site journal article supplement (doi:10.1515/snde-2017-0071), 2018-10-02
Supplement: Supplementary file 475 [file pred_es_H1.xlsx]

## Sheet: 1
	Var1	Var2	Var3	Var4	Var5	Var6	Var7	Var8	Var9	Var10	Var11	Var12	Var13	Var14	Var15	Var16	Var17	Var18	Var19	Var20	Var21	Var22	Var23	Var24	Var25
1	154	-12.2976	-8.94788	-6.50279	-5.38493	-4.70172	-4.2255	-3.867	-3.58346	-3.46186	-3.35093	-3.15532	-2.9873	-2.39445	-2.01723	1.75545	1.96289	2.25302	2.32865	2.41352	2.46021	2.51028	2.6229	2.75781	2.92607
2	332	-5.69111	-4.12627	-2.99243	-2.4776	-2.16421	-1.94595	-1.78168	-1.6516	-1.59578	-1.54483	-1.45475	-1.3772	-1.10165	-0.924012	1.07227	1.19935	1.38231	1.4312	1.48671	1.51756	1.55093	1.62707	1.72038	1.84026
3	510	-2.53812	-1.97064	-1.53721	-1.32795	-1.19403	-1.09678	-1.02097	-0.959059	-0.931922	-0.906832	-0.861714	-0.822006	-0.673732	-0.571272	0.783933	0.861105	0.966898	0.994078	1.02438	1.04098	1.05872	1.09843	1.14557	1.20375
4	688	-2.51727	-1.93477	-1.49268	-1.28237	-1.14963	-1.05463	-0.981438	-0.922308	-0.896586	-0.872915	-0.830636	-0.79375	-0.658579	-0.567766	0.491194	0.550268	0.632307	0.653595	0.677457	0.690565	0.70462	0.736232	0.774084	0.821301
5	866	-3.79296	-2.9749	-2.32905	-2.0112	-1.80688	-1.65843	-1.54275	-1.44842	-1.40715	-1.36905	-1.30069	-1.24072	-1.01858	-0.86723	1.00566	1.10981	1.25234	1.28888	1.32958	1.35185	1.37563	1.42877	1.49181	1.56943
6	1044	-2.72191	-2.08902	-1.61208	-1.384	-1.23985	-1.13641	-1.05661	-0.992024	-0.963894	-0.937988	-0.891684	-0.851253	-0.702894	-0.602846	0.651136	0.722371	0.819357	0.844137	0.871698	0.886757	0.90283	0.938666	0.981007	1.03295
7	1222	-2.8366	-2.29008	-1.84528	-1.61948	-1.47094	-1.36129	-1.27488	-1.2037	-1.17236	-1.1433	-1.09087	-1.04455	-0.870149	-0.748625	0.901423	0.996701	1.12653	1.1597	1.1966	1.21676	1.23828	1.28625	1.34288	1.41229
8	1400	-5.45063	-4.24513	-3.29143	-2.82133	-2.51878	-2.29954	-2.12925	-1.99089	-1.93047	-1.87476	-1.77503	-1.68784	-1.36798	-1.153	1.43122	1.60343	1.85648	1.92488	2.00287	2.04635	2.09346	2.20115	2.33319	2.50252
9	1578	-2.56505	-2.16065	-1.80802	-1.61846	-1.48949	-1.39197	-1.31355	-1.24795	-1.21874	-1.1915	-1.14194	-1.0977	-0.927569	-0.805539	0.970878	1.07381	1.21463	1.25075	1.29102	1.31306	1.33661	1.38924	1.45168	1.52865
10	1756	-2.80895	-2.46838	-2.14916	-1.96862	-1.84192	-1.74378	-1.66353	-1.59544	-1.56487	-1.53621	-1.48375	-1.43657	-1.25165	-1.11596	1.0291	1.15277	1.31818	1.35978	1.40578	1.43076	1.45733	1.51618	1.585	1.66817
11	1934	-2.45842	-2.12856	-1.83595	-1.67609	-1.56613	-1.48227	-1.41432	-1.3571	-1.33152	-1.30758	-1.26387	-1.2247	-1.07242	-0.961699	0.820289	0.934487	1.09211	1.13277	1.17821	1.20314	1.2298	1.28953	1.36063	1.4486
12	2112	-2.9479	-2.28897	-1.77943	-1.53307	-1.37658	-1.264	-1.1769	-1.10631	-1.07554	-1.04718	-0.996473	-0.952132	-0.788979	-0.678884	0.695106	0.777355	0.892134	0.922027	0.955576	0.974043	0.993844	1.03842	1.09184	1.15853
13	2290	-2.99027	-2.44283	-1.99671	-1.76993	-1.62042	-1.50969	-1.42212	-1.34976	-1.31781	-1.28815	-1.2345	-1.18696	-1.00686	-0.880066	0.887755	0.986364	1.11882	1.15231	1.18938	1.20956	1.23104	1.27867	1.33455	1.40254
14	2468	-2.68545	-2.19123	-1.78266	-1.57262	-1.43367	-1.3307	-1.24919	-1.18187	-1.15217	-1.12462	-1.07485	-1.03087	-0.865041	-0.749218	0.804399	0.892493	1.0119	1.04227	1.07597	1.09435	1.11393	1.1575	1.20874	1.27128
15	2646	-2.43715	-2.08711	-1.78037	-1.61523	-1.50273	-1.41743	-1.34862	-1.29094	-1.26524	-1.24126	-1.1976	-1.15863	-1.0085	-0.900611	0.772905	0.88566	1.04524	1.08718	1.13444	1.16055	1.18862	1.25202	1.3284	1.42451
16	2824	-2.76079	-2.18483	-1.7178	-1.48447	-1.33273	-1.22174	-1.13488	-1.06381	-1.03266	-1.00387	-0.952102	-0.90659	-0.737253	-0.621128	0.881203	0.969652	1.0916	1.12307	1.15826	1.17755	1.19819	1.24442	1.29944	1.36763
17	3002	-3.54681	-2.73058	-2.11519	-1.82153	-1.63571	-1.50216	-1.39898	-1.31537	-1.27892	-1.24534	-1.18523	-1.13265	-0.938872	-0.807331	0.802406	0.890664	1.01031	1.04075	1.07453	1.09295	1.11259	1.15631	1.20778	1.27064
18	3180	-2.53407	-2.248	-1.97226	-1.8128	-1.69942	-1.61074	-1.5376	-1.47512	-1.44695	-1.42047	-1.37175	-1.32772	-1.15341	-1.0238	1.16297	1.297	1.47872	1.52499	1.57634	1.60433	1.63419	1.70063	1.77885	1.8745
19	3358	-2.408	-1.88394	-1.47663	-1.27832	-1.15167	-1.06013	-0.989159	-0.931484	-0.9063	-0.883055	-0.841374	-0.804839	-0.669629	-0.577407	0.644796	0.726859	0.845118	0.87665	0.912424	0.932278	0.953707	1.00249	1.06201	1.13791
20	3536	-1.7386	-1.41374	-1.1414	-1.0011	-0.908421	-0.83986	-0.785698	-0.741024	-0.721344	-0.7031	-0.670203	-0.641168	-0.53207	-0.456256	0.546133	0.601907	0.67721	0.696324	0.717521	0.729071	0.741373	0.768692	0.80081	0.839921
21	3714	-1.55105	-1.27121	-1.04025	-0.922199	-0.844467	-0.787053	-0.741709	-0.704303	-0.687815	-0.672524	-0.644891	-0.620467	-0.528402	-0.464158	0.412654	0.46291	0.531134	0.548508	0.567814	0.578348	0.589578	0.614587	0.64411	0.680197
22	3892	-2.20276	-1.85184	-1.53621	-1.36308	-1.24383	-1.15264	-1.07879	-1.01664	-0.988904	-0.962962	-0.915645	-0.873282	-0.709104	-0.590201	1.20327	1.30438	1.4397	1.47375	1.51138	1.53181	1.55353	1.60161	1.65779	1.72577
23	4070	-2.69298	-2.35294	-2.03986	-1.86592	-1.74493	-1.65194	-1.57641	-1.51263	-1.48408	-1.45736	-1.4085	-1.36466	-1.19379	-1.06908	0.863174	0.975843	1.12799	1.1666	1.20944	1.23278	1.25766	1.31295	1.37791	1.4571
24	4248	-2.36396	-2.05264	-1.76584	-1.60578	-1.49439	-1.40886	-1.33934	-1.28065	-1.25436	-1.22976	-1.1848	-1.14448	-0.987292	-0.872652	0.908629	1.01031	1.14646	1.18077	1.21871	1.23933	1.26125	1.3098	1.36655	1.43522
25	4426	-2.73722	-2.27857	-1.88932	-1.68711	-1.55276	-1.45287	-1.37364	-1.30819	-1.27928	-1.25244	-1.20391	-1.161	-0.998948	-0.885647	0.700384	0.800589	0.941073	0.977771	1.019	1.0417	1.06607	1.12093	1.18672	1.26891
26	4604	-2.35276	-2.07524	-1.81561	-1.668	-1.56415	-1.48374	-1.41785	-1.3619	-1.33675	-1.31316	-1.26992	-1.23099	-1.07794	-0.964963	0.911899	1.03277	1.20042	1.24384	1.29243	1.31911	1.34771	1.41189	1.48843	1.58342
27	4782	-3.31362	-2.76915	-2.30483	-2.06103	-1.89736	-1.77478	-1.67695	-1.59552	-1.55945	-1.52589	-1.465	-1.41091	-1.20472	-1.05857	1.00108	1.12066	1.28373	1.3254	1.37179	1.39715	1.42422	1.48456	1.55593	1.64351
28	4960	-1.60659	-1.38783	-1.18433	-1.06975	-0.989659	-0.928	-0.877665	-0.835073	-0.815967	-0.798078	-0.765365	-0.735984	-0.621227	-0.537222	0.775482	0.851787	0.954515	0.980542	1.00938	1.02508	1.04179	1.0789	1.12244	1.17537
29	5138	-3.5254	-3.09779	-2.69973	-2.47606	-2.3201	-2.19985	-2.1019	-2.01915	-1.98208	-1.94736	-1.88383	-1.82675	-1.60387	-1.44084	1.11137	1.26184	1.46526	1.51704	1.57451	1.60583	1.6392	1.71341	1.80069	1.90704
30	5316	-1.78486	-1.56813	-1.3623	-1.24443	-1.16121	-1.09648	-1.04332	-0.998098	-0.977771	-0.958692	-0.923685	-0.892129	-0.767891	-0.675996	0.803602	0.889736	1.0056	1.03493	1.06744	1.08513	1.10396	1.14579	1.1949	1.25458
31	5494	-2.33432	-2.05148	-1.77902	-1.62149	-1.50949	-1.42218	-1.35042	-1.28927	-1.26173	-1.23587	-1.18837	-1.14551	-0.976637	-0.851753	1.2297	1.3661	1.5564	1.60586	1.66134	1.69185	1.72455	1.79807	1.886	1.99539
32	5672	-2.27774	-2.01188	-1.75993	-1.61614	-1.51471	-1.43594	-1.37133	-1.31641	-1.29172	-1.26855	-1.22605	-1.18773	-1.03702	-0.92583	0.888874	1.00009	1.1521	1.19102	1.23438	1.25808	1.28339	1.33988	1.40674	1.48887
33	5850	-3.2926	-2.89943	-2.52615	-2.31193	-2.16013	-2.04209	-1.94503	-1.86247	-1.82532	-1.79045	-1.72647	-1.66881	-1.44169	-1.27358	1.42279	1.57681	1.78265	1.83447	1.89172	1.9228	1.95582	2.02892	2.1144	2.21787
34	6028	-3.95162	-3.46043	-3.00601	-2.7509	-2.57286	-2.43566	-2.3237	-2.22904	-2.1866	-2.14683	-2.07401	-2.00862	-1.75318	-1.56602	1.36444	1.5321	1.75676	1.81339	1.87598	1.90999	1.94614	2.02622	2.11989	2.23335
35	6206	-5.70879	-5.03084	-4.38611	-4.01611	-3.75507	-3.55245	-3.38617	-3.24481	-3.18117	-3.12144	-3.01186	-2.91311	-2.52445	-2.23736	2.4141	2.6926	3.07019	3.16634	3.27311	3.33128	3.39324	3.53119	3.69347	3.89182
36	6384	-3.47011	-3.03643	-2.62796	-2.39623	-2.23374	-2.10802	-2.00523	-1.91801	-1.87888	-1.84221	-1.77512	-1.71481	-1.47841	-1.30465	1.45295	1.61316	1.82849	1.8829	1.94311	1.97584	2.01067	2.08788	2.17825	2.28768
37	6562	-3.14216	-2.74962	-2.38537	-2.1805	-2.03707	-1.92635	-1.83594	-1.75928	-1.72488	-1.69262	-1.63353	-1.58039	-1.37232	-1.21948	1.18952	1.32664	1.50994	1.55607	1.60704	1.63474	1.66417	1.72933	1.80549	1.89756
38	6740	-2.47303	-2.17456	-1.89387	-1.73355	-1.62039	-1.53241	-1.46	-1.39829	-1.37049	-1.34439	-1.29643	-1.25313	-1.08205	-0.954932	1.11131	1.23067	1.39081	1.43123	1.47594	1.50024	1.52608	1.5834	1.65051	1.73186
39	6918	-2.13768	-1.91737	-1.70056	-1.57407	-1.48372	-1.41289	-1.35435	-1.30432	-1.28174	-1.26052	-1.22149	-1.18624	-1.04668	-0.942771	0.759703	0.856986	0.986541	1.01908	1.05502	1.07451	1.09522	1.14105	1.19462	1.25925
40	7096	-3.29663	-2.86687	-2.47406	-2.25619	-2.10535	-1.98991	-1.89625	-1.81735	-1.78211	-1.74914	-1.68894	-1.63505	-1.42631	-1.27529	1.06117	1.2113	1.42083	1.47537	1.53652	1.57014	1.60617	1.68715	1.78404	1.9045
41	7274	-2.6479	-2.297	-1.96818	-1.78229	-1.65204	-1.55149	-1.46935	-1.39982	-1.36865	-1.33942	-1.28594	-1.23788	-1.04995	-0.912085	1.23275	1.35454	1.51746	1.55853	1.60397	1.62867	1.6549	1.71303	1.78101	1.86331
42	7452	-3.43864	-2.93022	-2.4853	-2.24787	-2.08724	-1.96636	-1.86946	-1.78857	-1.75266	-1.71919	-1.65838	-1.60422	-1.39681	-1.24896	0.862176	0.978737	1.13434	1.17351	1.2168	1.24031	1.26529	1.32058	1.38515	1.46315
43	7630	-2.79266	-2.42108	-2.07452	-1.8801	-1.74443	-1.64	-1.55491	-1.48304	-1.45083	-1.42065	-1.36549	-1.31601	-1.12307	-0.982429	1.16998	1.29096	1.45265	1.49332	1.53825	1.56265	1.58855	1.64589	1.71279	1.79361
44	7808	-3.84628	-3.31405	-2.83298	-2.56872	-2.38675	-2.24826	-2.13635	-2.04239	-2.00048	-1.96134	-1.89004	-1.82634	-1.58058	-1.4037	1.17842	1.32251	1.51566	1.56438	1.61831	1.64765	1.67887	1.74802	1.82902	1.92731
45	7986	-3.16464	-2.72197	-2.31615	-2.09121	-1.93543	-1.8163	-1.71978	-1.63858	-1.6023	-1.5684	-1.50656	-1.45117	-1.23656	-1.08133	1.20327	1.32772	1.49327	1.53477	1.58059	1.60544	1.63185	1.69027	1.75835	1.84037
46	8164	-2.67749	-2.31986	-1.98698	-1.80049	-1.67072	-1.57105	-1.49008	-1.42178	-1.3912	-1.36258	-1.31026	-1.26332	-1.08073	-0.94796	1.05802	1.17093	1.32235	1.36061	1.40293	1.42595	1.45044	1.50477	1.56837	1.64546
47	8342	-2.85231	-2.457	-2.0957	-1.89629	-1.75857	-1.65349	-1.56847	-1.49702	-1.46514	-1.43536	-1.38109	-1.3326	-1.14531	-1.01031	0.994548	1.1138	1.27737	1.31933	1.3661	1.39166	1.41898	1.48003	1.55235	1.64133
48	8520	-2.166	-1.8616	-1.58321	-1.42894	-1.32211	-1.2406	-1.17458	-1.11899	-1.09417	-1.07098	-1.02868	-0.99083	-0.844319	-0.738495	0.835842	0.92609	1.04816	1.07918	1.11359	1.13233	1.1523	1.19668	1.24884	1.31227
49	8698	-3.50107	-2.98323	-2.50565	-2.23956	-2.0552	-1.91385	-1.79909	-1.70246	-1.65926	-1.61888	-1.54522	-1.47927	-1.22357	-1.03837	1.74582	1.90956	2.13241	2.18936	2.25269	2.28729	2.32421	2.4066	2.50399	2.62325
50	8876	-2.50578	-2.11584	-1.77171	-1.58626	-1.46036	-1.36545	-1.28931	-1.22583	-1.19765	-1.1714	-1.12369	-1.08122	-0.918922	-0.803678	0.898041	1.01428	1.18127	1.22562	1.27578	1.30354	1.33346	1.40131	1.48352	1.58737
51	9054	-4.20553	-3.52442	-2.93172	-2.61857	-2.40867	-2.25183	-2.12716	-2.02383	-1.97817	-1.93577	-1.85908	-1.79117	-1.53446	-1.3547	1.22085	1.39909	1.65611	1.72464	1.80232	1.84542	1.89193	1.99745	2.12565	2.28803
52	9232	-6.55541	-5.13414	-3.99484	-3.43229	-3.07165	-2.81148	-2.61038	-2.44778	-2.37708	-2.31207	-2.196	-2.09485	-1.72655	-1.48214	1.31502	1.48283	1.72055	1.7831	1.85357	1.89246	1.93428	2.02875	2.14246	2.28488
53	9410	-3.96142	-3.23595	-2.62163	-2.30353	-2.09304	-1.93742	-1.81457	-1.71341	-1.66888	-1.62764	-1.5533	-1.48775	-1.24224	-1.0728	1.1628	1.30296	1.50061	1.55245	1.61073	1.64287	1.67741	1.75535	1.84911	1.96637
54	9430	-4.62826	-3.56358	-2.72406	-2.315	-2.05508	-1.86868	-1.72532	-1.60978	-1.55967	-1.51363	-1.43158	-1.36027	-1.1023	-0.932512	0.930708	1.03405	1.17737	1.21447	1.25597	1.27873	1.30309	1.35772	1.42267	1.50297
55	0	0.005	0.01	0.02	0.03	0.04	0.05	0.06	0.07	0.075	0.08	0.09	0.1	0.15	0.2	0.8	0.85	0.9	0.91	0.92	0.925	0.93	0.94	0.95	0.96
