# Supplementary material for: Time-varying asymmetry and tail thickness in long series of daily financial returns
Source: publisher site journal article supplement (doi:10.1515/snde-2017-0071), 2018-10-02
Supplement: Supplementary file 477 [file pred_es_H2.xlsx]

## Sheet: 1
	Var1	Var2	Var3	Var4	Var5	Var6	Var7	Var8	Var9	Var10	Var11	Var12	Var13	Var14	Var15	Var16	Var17	Var18	Var19	Var20	Var21	Var22	Var23	Var24	Var25
1	154	-13.8954	-10.0714	-7.28868	-6.02052	-5.24714	-4.7088	-4.30396	-3.9838	-3.84666	-3.72167	-3.50135	-3.31231	-2.64757	-2.22653	1.89869	2.1312	2.46108	2.548	2.64607	2.70029	2.75863	2.89058	3.04995	3.25079
2	332	-5.94765	-4.32469	-3.14314	-2.60539	-2.2778	-2.0496	-1.87784	-1.74181	-1.68344	-1.63015	-1.53601	-1.45498	-1.16752	-0.982782	1.07348	1.20805	1.40396	1.45673	1.51693	1.55049	1.58688	1.6702	1.77282	1.90542
3	510	-2.8051	-2.184	-1.70876	-1.4799	-1.33392	-1.22817	-1.14592	-1.07898	-1.04969	-1.02264	-0.97407	-0.931412	-0.772815	-0.663965	0.74041	0.821129	0.932766	0.961643	0.993945	1.01168	1.03068	1.07331	1.1242	1.18746
4	688	-2.6204	-2.00711	-1.54216	-1.32091	-1.18155	-1.08179	-1.00489	-0.942773	-0.915771	-0.890928	-0.846571	-0.807882	-0.666553	-0.572017	0.515727	0.576608	0.661624	0.683771	0.708651	0.722366	0.737096	0.7703	0.810208	0.860256
5	866	-4.19619	-3.2992	-2.59052	-2.24207	-2.01791	-1.85524	-1.7286	-1.62551	-1.58048	-1.53894	-1.46446	-1.39918	-1.15829	-0.995101	0.978066	1.08819	1.23996	1.27909	1.3228	1.34676	1.37239	1.42979	1.49811	1.58271
6	1044	-2.94811	-2.2612	-1.74289	-1.49622	-1.34065	-1.22938	-1.14363	-1.07426	-1.04408	-1.01632	-0.966723	-0.923443	-0.764827	-0.658158	0.652323	0.726664	0.828434	0.854512	0.883582	0.899485	0.916491	0.954472	0.999484	1.05496
7	1222	-3.11365	-2.51566	-2.02688	-1.77906	-1.61657	-1.49691	-1.40269	-1.32518	-1.29108	-1.25948	-1.20256	-1.15237	-0.964298	-0.833943	0.894485	0.994299	1.13094	1.16601	1.20512	1.22653	1.24941	1.30057	1.36127	1.43607
8	1400	-5.56712	-4.32288	-3.33918	-2.85715	-2.54944	-2.32711	-2.15475	-2.01502	-1.95411	-1.89801	-1.79773	-1.7102	-1.38962	-1.17514	1.35962	1.52936	1.77982	1.84774	1.92525	1.96849	2.01536	2.12266	2.25452	2.42399
9	1578	-2.80222	-2.35253	-1.96253	-1.7553	-1.61497	-1.5092	-1.42438	-1.35361	-1.32215	-1.29283	-1.23957	-1.19213	-1.01061	-0.881268	0.961994	1.06869	1.21522	1.25294	1.29504	1.31811	1.34279	1.39801	1.46368	1.54479
10	1756	-3.03852	-2.61916	-2.23671	-2.02516	-1.87886	-1.76701	-1.67641	-1.60015	-1.56608	-1.53422	-1.47613	-1.42414	-1.22305	-1.07765	1.11893	1.24642	1.41849	1.46208	1.51039	1.53669	1.5647	1.62695	1.70021	1.78947
11	1934	-2.54213	-2.16807	-1.83609	-1.65615	-1.53359	-1.44084	-1.36623	-1.30382	-1.27604	-1.25011	-1.20296	-1.16089	-0.998985	-0.882794	0.906699	1.02106	1.17984	1.22099	1.26706	1.29236	1.31946	1.38024	1.45272	1.54264
12	2112	-3.22955	-2.50013	-1.93666	-1.66465	-1.49193	-1.36776	-1.27191	-1.19437	-1.16064	-1.12959	-1.07407	-1.02561	-0.848341	-0.72936	0.721738	0.808341	0.929816	0.961594	0.997321	1.01701	1.03817	1.08589	1.14332	1.21537
13	2290	-3.20629	-2.6103	-2.12012	-1.87044	-1.70593	-1.58441	-1.48858	-1.40967	-1.37491	-1.34269	-1.28457	-1.23324	-1.04006	-0.905418	0.90961	1.01105	1.14848	1.18348	1.22233	1.24353	1.26612	1.31646	1.37584	1.44853
14	2468	-2.97306	-2.41696	-1.95691	-1.72091	-1.56549	-1.45065	-1.36004	-1.28541	-1.25255	-1.22208	-1.16716	-1.11872	-0.937185	-0.811573	0.81932	0.9118	1.03826	1.07066	1.10675	1.12649	1.14756	1.19462	1.25031	1.31879
15	2646	-2.47042	-2.0795	-1.74273	-1.56391	-1.44294	-1.35193	-1.27901	-1.21819	-1.19119	-1.16603	-1.12033	-1.07966	-0.923981	-0.813188	0.843959	0.954798	1.11207	1.15356	1.20036	1.22622	1.25406	1.31711	1.39331	1.48948
16	2824	-3.19366	-2.53264	-1.99973	-1.73491	-1.56366	-1.43898	-1.34177	-1.26249	-1.2278	-1.19576	-1.1383	-1.08791	-0.901427	-0.774561	0.819804	0.913354	1.04328	1.07699	1.11476	1.13551	1.15774	1.20775	1.26762	1.34216
17	3002	-3.83127	-2.92804	-2.24871	-1.92576	-1.72249	-1.57703	-1.46506	-1.3746	-1.33525	-1.29904	-1.23436	-1.17792	-0.971164	-0.831996	0.818685	0.909513	1.03399	1.06594	1.10156	1.12105	1.14187	1.1884	1.24358	1.31164
18	3180	-2.78459	-2.43651	-2.10954	-1.92464	-1.79511	-1.69507	-1.61344	-1.54435	-1.51334	-1.48427	-1.43102	-1.38317	-1.19609	-1.05876	1.14907	1.28371	1.46735	1.51436	1.56671	1.59533	1.62587	1.69394	1.77427	1.87266
19	3358	-2.61442	-2.03975	-1.59414	-1.37773	-1.23959	-1.1398	-1.06232	-0.999362	-0.971869	-0.946515	-0.901074	-0.86128	-0.714484	-0.614912	0.670239	0.755913	0.879716	0.912821	0.950424	0.971329	0.993926	1.04544	1.10832	1.1887
20	3536	-1.90372	-1.54634	-1.24672	-1.09233	-0.990615	-0.915631	-0.85657	-0.808037	-0.786689	-0.766914	-0.731285	-0.699874	-0.582364	-0.501255	0.539282	0.59697	0.675391	0.695406	0.717669	0.729826	0.742788	0.771677	0.805771	0.847573
21	3714	-1.61605	-1.30861	-1.05622	-0.927409	-0.842714	-0.78026	-0.731042	-0.69059	-0.672795	-0.656309	-0.626595	-0.600394	-0.502122	-0.43397	0.468802	0.520279	0.590483	0.60844	0.628437	0.639365	0.651035	0.677073	0.707873	0.74569
22	3892	-2.55835	-2.16723	-1.8211	-1.63318	-1.50476	-1.40737	-1.32904	-1.26346	-1.23426	-1.20703	-1.15751	-1.11334	-0.943514	-0.821781	0.943877	1.04276	1.17561	1.20922	1.24646	1.26673	1.28831	1.33622	1.39245	1.46079
23	4070	-2.6928	-2.31323	-1.96971	-1.78078	-1.65082	-1.55184	-1.47184	-1.40462	-1.37464	-1.34663	-1.29556	-1.24992	-1.07351	-0.94616	0.947704	1.05695	1.20491	1.2426	1.2845	1.30739	1.3318	1.38623	1.45046	1.5291
24	4248	-2.51904	-2.16579	-1.84392	-1.6666	-1.54443	-1.45127	-1.37594	-1.31268	-1.28446	-1.25809	-1.21001	-1.16703	-1.00083	-0.880901	0.911017	1.01234	1.14855	1.18305	1.22125	1.24204	1.26417	1.3133	1.371	1.44118
25	4426	-2.80529	-2.30664	-1.88501	-1.6667	-1.52181	-1.41434	-1.32937	-1.25922	-1.22829	-1.19959	-1.14778	-1.102	-0.929761	-0.810031	0.815659	0.917166	1.05987	1.09721	1.13919	1.16233	1.18719	1.24327	1.31062	1.39503
26	4604	-2.43112	-2.12284	-1.83471	-1.67236	-1.55919	-1.47184	-1.4007	-1.34059	-1.31365	-1.28841	-1.24224	-1.20076	-1.03878	-0.920245	0.983861	1.10503	1.27325	1.31689	1.36579	1.39265	1.42142	1.48599	1.56307	1.65889
27	4782	-3.3859	-2.80492	-2.31226	-2.05518	-1.88367	-1.75585	-1.65418	-1.56982	-1.5325	-1.49781	-1.43497	-1.37928	-1.16802	-1.01934	1.01068	1.12741	1.28725	1.32827	1.37399	1.39901	1.42576	1.48552	1.55644	1.64378
28	4960	-1.80062	-1.55447	-1.32893	-1.20335	-1.11606	-1.04912	-0.994765	-0.948919	-0.928412	-0.909216	-0.874145	-0.842706	-0.720571	-0.631847	0.714145	0.791583	0.896139	0.922668	0.952086	0.968115	0.985182	1.02312	1.06774	1.12218
29	5138	-3.5699	-3.10025	-2.66665	-2.42434	-2.25598	-2.12695	-2.0222	-1.93395	-1.89449	-1.85757	-1.79015	-1.72975	-1.4953	-1.3252	1.25927	1.40965	1.61361	1.66546	1.72308	1.75451	1.78799	1.86255	1.95039	2.0578
30	5316	-1.98299	-1.73231	-1.49705	-1.36414	-1.27102	-1.19908	-1.14039	-1.09067	-1.06836	-1.04746	-1.0092	-0.974781	-0.840101	-0.741285	0.803401	0.892481	1.01254	1.04296	1.07666	1.09501	1.11455	1.15799	1.20903	1.2711
31	5494	-2.6193	-2.30132	-1.9985	-1.82525	-1.70307	-1.60835	-1.53084	-1.46511	-1.4356	-1.40794	-1.35725	-1.31163	-1.13293	-1.00165	1.1276	1.26553	1.45821	1.5084	1.5647	1.59568	1.62889	1.70359	1.79302	1.90448
32	5672	-2.37924	-2.08328	-1.80494	-1.64762	-1.53751	-1.45243	-1.38293	-1.32402	-1.2976	-1.27285	-1.22751	-1.1867	-1.02703	-0.909979	0.945259	1.05773	1.2116	1.25102	1.2949	1.3189	1.34454	1.40182	1.46964	1.55303
33	5850	-3.53267	-3.095	-2.68325	-2.44984	-2.28585	-2.15905	-2.05535	-1.96751	-1.9281	-1.89115	-1.82346	-1.76261	-1.52455	-1.35007	1.36787	1.52128	1.72631	1.77793	1.83505	1.8661	1.89912	1.97233	2.05797	2.16168
34	6028	-4.09315	-3.55235	-3.05544	-2.77948	-2.58778	-2.44061	-2.32103	-2.22019	-2.17508	-2.13289	-2.05582	-1.98672	-1.71793	-1.52248	1.45471	1.62264	1.84746	1.90415	1.96686	2.00095	2.0372	2.1175	2.2114	2.32511
35	6206	-6.09293	-5.3507	-4.64855	-4.25053	-3.97115	-3.75513	-3.5786	-3.42897	-3.36179	-3.29882	-3.18343	-3.07967	-2.67368	-2.37581	2.31211	2.58903	2.96482	3.06043	3.16663	3.22458	3.28637	3.42399	3.58639	3.78501
36	6384	-3.75747	-3.28028	-2.83476	-2.58388	-2.4085	-2.27333	-2.16309	-2.06987	-2.02807	-1.98892	-1.91726	-1.8529	-1.6018	-1.41821	1.42501	1.58857	1.80864	1.86428	1.92582	1.95929	1.99489	2.07389	2.16642	2.27878
37	6562	-3.30183	-2.87571	-2.48013	-2.25904	-2.10512	-1.98666	-1.89016	-1.80857	-1.77204	-1.73784	-1.67525	-1.61905	-1.39974	-1.23952	1.23016	1.36907	1.55479	1.60157	1.65327	1.68138	1.71126	1.77745	1.85479	1.9483
38	6740	-2.64529	-2.32312	-2.02095	-1.84952	-1.72865	-1.63498	-1.55823	-1.49303	-1.46374	-1.43625	-1.38581	-1.34034	-1.1613	-1.02902	1.0765	1.19687	1.35834	1.39913	1.44432	1.4689	1.49504	1.55304	1.62093	1.70328
39	6918	-2.15074	-1.90969	-1.67476	-1.53856	-1.44176	-1.36633	-1.30431	-1.25148	-1.2277	-1.20535	-1.16432	-1.1273	-0.981298	-0.873101	0.862485	0.960451	1.09096	1.12373	1.1599	1.17953	1.20039	1.24654	1.30033	1.36535
40	7096	-3.29058	-2.84378	-2.43481	-2.20817	-2.05128	-1.93127	-1.83404	-1.7523	-1.71581	-1.6817	-1.6195	-1.56386	-1.34878	-1.19349	1.16877	1.31877	1.52827	1.58281	1.644	1.67764	1.71372	1.79483	1.8918	2.01238
41	7274	-2.90467	-2.53058	-2.18023	-1.98285	-1.84517	-1.73921	-1.65291	-1.58	-1.54732	-1.5167	-1.46067	-1.41037	-1.21422	-1.07098	1.11929	1.24223	1.40674	1.4482	1.4941	1.51903	1.54553	1.60424	1.67293	1.75608
42	7452	-3.42696	-2.88445	-2.41553	-2.16622	-1.99804	-1.87153	-1.77031	-1.686	-1.64857	-1.61369	-1.55037	-1.49405	-1.27904	-1.12631	1.02226	1.13954	1.29604	1.33539	1.37888	1.40251	1.42763	1.48322	1.54816	1.62663
43	7630	-2.99987	-2.60534	-2.23821	-2.0322	-1.88888	-1.77885	-1.68941	-1.61385	-1.58004	-1.54841	-1.49062	-1.4388	-1.23728	-1.09071	1.11341	1.23577	1.39902	1.44012	1.48554	1.51017	1.53633	1.59426	1.66193	1.74372
44	7808	-3.91956	-3.3579	-2.85083	-2.57372	-2.38357	-2.23897	-2.12233	-2.02455	-1.98095	-1.94023	-1.86612	-1.79992	-1.54502	-1.36197	1.27075	1.41613	1.61102	1.66028	1.71479	1.74444	1.77597	1.8459	1.92784	2.0272
45	7986	-3.37233	-2.89722	-2.46411	-2.22498	-2.06011	-1.93445	-1.83286	-1.74754	-1.7095	-1.67397	-1.60927	-1.55146	-1.32831	-1.16764	1.15356	1.2787	1.4451	1.48679	1.53277	1.55771	1.5842	1.64281	1.71122	1.79377
46	8164	-2.82413	-2.44804	-2.09876	-1.90329	-1.76761	-1.66363	-1.57928	-1.50813	-1.4763	-1.4465	-1.39209	-1.34335	-1.15426	-1.01709	1.02261	1.13602	1.28809	1.3265	1.36901	1.39215	1.41677	1.47141	1.53545	1.61307
47	8342	-2.96102	-2.53876	-2.15561	-1.94538	-1.80091	-1.69097	-1.60214	-1.52756	-1.4943	-1.46326	-1.40676	-1.3563	-1.16196	-1.02236	1.02097	1.14145	1.30663	1.34901	1.39623	1.42204	1.44963	1.51127	1.5843	1.67413
48	8520	-2.3095	-1.98335	-1.68562	-1.5217	-1.40875	-1.32258	-1.25295	-1.19446	-1.16837	-1.14399	-1.09958	-1.0599	-0.906705	-0.796399	0.82086	0.912876	1.0372	1.06874	1.10373	1.12279	1.1431	1.18824	1.24134	1.30601
49	8698	-3.92918	-3.38534	-2.88354	-2.60479	-2.41222	-2.26501	-2.14578	-2.04547	-2.00067	-1.9588	-1.88242	-1.81409	-1.54956	-1.3585	1.47143	1.63607	1.86054	1.91795	1.98184	2.01673	2.05396	2.137	2.23515	2.35542
50	8876	-2.6432	-2.22546	-1.86045	-1.66496	-1.53248	-1.43263	-1.3527	-1.28611	-1.25659	-1.22911	-1.17925	-1.13493	-0.965984	-0.846309	0.899937	1.01794	1.18707	1.23195	1.28272	1.31086	1.34119	1.4099	1.49307	1.5981
51	9054	-4.23852	-3.53352	-2.92354	-2.60075	-2.38491	-2.22395	-2.09601	-1.99009	-1.9433	-1.89986	-1.82129	-1.75173	-1.48892	-1.30507	1.30867	1.48691	1.74355	1.81192	1.88938	1.93231	1.97862	2.08377	2.21151	2.37334
52	9232	-6.78413	-5.28118	-4.08672	-3.50025	-3.12554	-2.85597	-2.64812	-2.48015	-2.40716	-2.34006	-2.22046	-2.11636	-1.73811	-1.48758	1.35421	1.52211	1.76008	1.82275	1.89337	1.93234	1.97425	2.06893	2.18288	2.32585
53	9410	-4.1289	-3.36919	-2.73301	-2.40406	-2.18667	-2.02631	-1.89978	-1.7956	-1.74978	-1.70734	-1.63086	-1.56343	-1.31109	-1.13699	1.14658	1.28836	1.48847	1.54101	1.60014	1.63273	1.66774	1.74668	1.84151	1.96009
54	9430	-4.91056	-3.77211	-2.88024	-2.44799	-2.17426	-1.97846	-1.82805	-1.70704	-1.65459	-1.60642	-1.52066	-1.4462	-1.17709	-1.00013	0.924945	1.03024	1.17614	1.21386	1.25605	1.27919	1.30395	1.3595	1.42564	1.50747
55	0	0.005	0.01	0.02	0.03	0.04	0.05	0.06	0.07	0.075	0.08	0.09	0.1	0.15	0.2	0.8	0.85	0.9	0.91	0.92	0.925	0.93	0.94	0.95	0.96
