# Supplementary material for: Time-varying asymmetry and tail thickness in long series of daily financial returns
Source: publisher site journal article supplement (doi:10.1515/snde-2017-0071), 2018-10-02
Supplement: Supplementary file 479 [file pred_es_H3.xlsx]

## Sheet: 1
	Var1	Var2	Var3	Var4	Var5	Var6	Var7	Var8	Var9	Var10	Var11	Var12	Var13	Var14	Var15	Var16	Var17	Var18	Var19	Var20	Var21	Var22	Var23	Var24	Var25
1	154	-14.7825	-10.7076	-7.73603	-6.37838	-5.55156	-4.97646	-4.5443	-4.20318	-4.05717	-3.92409	-3.68962	-3.48859	-2.78306	-2.33771	1.99175	2.2426	2.6029	2.69875	2.80733	2.86755	2.93254	3.08019	3.25976	3.48798
2	332	-6.13307	-4.44969	-3.22615	-2.66991	-2.33134	-2.09602	-1.91913	-1.77912	-1.71908	-1.66428	-1.56751	-1.4843	-1.18974	-1.00103	1.08574	1.22391	1.42616	1.48088	1.54335	1.57824	1.61607	1.70282	1.80987	1.94866
3	510	-2.97722	-2.30528	-1.79561	-1.55135	-1.39607	-1.28412	-1.19719	-1.12653	-1.09566	-1.06718	-1.01609	-0.971288	-0.805304	-0.691808	0.751182	0.835553	0.953201	0.98382	1.01816	1.03704	1.05731	1.10291	1.15756	1.22582
4	688	-2.72261	-2.07541	-1.58618	-1.35438	-1.20873	-1.10474	-1.02482	-0.960398	-0.932433	-0.906717	-0.860834	-0.820894	-0.675377	-0.578395	0.525227	0.588037	0.676336	0.699483	0.725539	0.739915	0.755374	0.790304	0.832429	0.885485
5	866	-4.42093	-3.45943	-2.70564	-2.33639	-2.0999	-1.92897	-1.79633	-1.68863	-1.64161	-1.59826	-1.52063	-1.45271	-1.20267	-1.03381	0.993965	1.1086	1.26744	1.30857	1.35461	1.37988	1.40695	1.46774	1.54034	1.63053
6	1044	-3.06926	-2.35044	-1.80876	-1.55125	-1.38897	-1.27285	-1.18341	-1.11117	-1.07976	-1.05087	-0.999269	-0.954262	-0.789707	-0.679364	0.666066	0.743443	0.850088	0.877625	0.90841	0.925291	0.943357	0.98385	1.03208	1.09177
7	1222	-3.24797	-2.61739	-2.10331	-1.84304	-1.67297	-1.54794	-1.44959	-1.36887	-1.3334	-1.30056	-1.24141	-1.1893	-0.99442	-0.859847	0.909477	1.01303	1.15561	1.19236	1.2334	1.25589	1.27994	1.33379	1.39788	1.47718
8	1400	-5.46185	-4.24886	-3.28623	-2.81262	-2.509	-2.28962	-2.11965	-1.98184	-1.92177	-1.86647	-1.76762	-1.68138	-1.36626	-1.15599	1.32652	1.49521	1.74534	1.81339	1.8912	1.93465	1.98177	2.08971	2.22257	2.39386
9	1578	-2.89265	-2.4221	-2.01685	-1.80152	-1.65622	-1.54695	-1.45953	-1.38665	-1.3543	-1.32416	-1.26942	-1.22074	-1.03458	-0.902209	0.97239	1.08187	1.23277	1.27171	1.31524	1.3391	1.36463	1.42189	1.49019	1.57492
10	1756	-3.15653	-2.70317	-2.29267	-2.06733	-1.91264	-1.79492	-1.6998	-1.61996	-1.58436	-1.55112	-1.49059	-1.43649	-1.22814	-1.07853	1.14283	1.27406	1.45255	1.49809	1.54872	1.57635	1.60583	1.6715	1.74898	1.84376
11	1934	-2.60984	-2.20459	-1.84956	-1.65985	-1.53146	-1.43489	-1.35754	-1.29305	-1.26443	-1.23777	-1.18936	-1.14626	-0.981348	-0.863809	0.916667	1.03265	1.19507	1.23742	1.28496	1.31113	1.33922	1.4024	1.47809	1.57248
12	2112	-3.43949	-2.64876	-2.04209	-1.75059	-1.56596	-1.43362	-1.3316	-1.24917	-1.21333	-1.18036	-1.12151	-1.07023	-0.88305	-0.757959	0.747534	0.838741	0.967664	1.00155	1.03975	1.06084	1.08354	1.13491	1.19692	1.27499
13	2290	-3.37466	-2.72398	-2.19381	-1.92653	-1.75194	-1.62385	-1.52327	-1.44072	-1.40441	-1.37078	-1.3102	-1.25682	-1.05687	-0.918354	0.923231	1.02828	1.1721	1.20902	1.25022	1.27277	1.29687	1.35075	1.41468	1.49351
14	2468	-3.1704	-2.56083	-2.06053	-1.80622	-1.63935	-1.51647	-1.41984	-1.34042	-1.30552	-1.27321	-1.21507	-1.16389	-0.972801	-0.841296	0.843089	0.940619	1.07516	1.10989	1.14876	1.17007	1.19286	1.24393	1.30471	1.37988
15	2646	-2.50288	-2.09019	-1.73761	-1.55131	-1.4262	-1.33253	-1.25787	-1.1958	-1.1683	-1.1427	-1.09629	-1.05507	-0.898179	-0.787266	0.843322	0.954255	1.11276	1.15477	1.20227	1.22855	1.25687	1.32108	1.39895	1.49747
16	2824	-3.41712	-2.70015	-2.12586	-1.84148	-1.65806	-1.52495	-1.42141	-1.33715	-1.30034	-1.26637	-1.2055	-1.15218	-0.955266	-0.821699	0.837583	0.936863	1.07587	1.1122	1.15302	1.17552	1.19968	1.25415	1.3197	1.40184
17	3002	-3.96923	-3.023	-2.31166	-1.97459	-1.76271	-1.61139	-1.495	-1.40115	-1.36036	-1.32283	-1.25586	-1.1975	-0.984399	-0.841854	0.830493	0.92476	1.0554	1.08923	1.1271	1.14789	1.17017	1.22022	1.28003	1.35447
18	3180	-2.89122	-2.50995	-2.15717	-1.95992	-1.82279	-1.71749	-1.63203	-1.55999	-1.52775	-1.49758	-1.44241	-1.393	-1.20085	-1.061	1.14435	1.28097	1.46865	1.51689	1.57072	1.60018	1.63166	1.70212	1.78588	1.8892
19	3358	-2.7469	-2.14342	-1.67226	-1.44298	-1.29659	-1.19081	-1.1088	-1.04225	-1.01322	-0.986449	-0.938527	-0.896626	-0.742441	-0.638226	0.690684	0.780362	0.910727	0.94573	0.98555	1.00771	1.03167	1.08631	1.15315	1.23871
20	3536	-2.01204	-1.62422	-1.30293	-1.13877	-1.03097	-0.951631	-0.889274	-0.838129	-0.815665	-0.794881	-0.757483	-0.724582	-0.601896	-0.517661	0.546919	0.60694	0.689251	0.710412	0.734016	0.746934	0.760746	0.791628	0.828288	0.873505
21	3714	-1.68963	-1.35776	-1.0873	-0.950634	-0.861237	-0.795593	-0.744016	-0.701673	-0.683074	-0.665857	-0.634877	-0.607605	-0.505742	-0.435542	0.482912	0.535945	0.608913	0.627697	0.648653	0.660132	0.672404	0.699879	0.732507	0.772775
22	3892	-2.62227	-2.21264	-1.85193	-1.65804	-1.52624	-1.42677	-1.34702	-1.28047	-1.25092	-1.22339	-1.17342	-1.12895	-0.958948	-0.837959	0.886162	0.984373	1.11765	1.15163	1.18939	1.20999	1.23195	1.2809	1.33861	1.40918
23	4070	-2.69522	-2.29661	-1.93869	-1.74387	-1.61074	-1.50974	-1.42838	-1.36029	-1.32998	-1.30168	-1.25022	-1.20431	-1.02781	-0.901398	0.937576	1.04544	1.19288	1.23067	1.27278	1.29582	1.32044	1.37545	1.44072	1.5211
24	4248	-2.58283	-2.20884	-1.87032	-1.68463	-1.55735	-1.46068	-1.38273	-1.31746	-1.28839	-1.26127	-1.2119	-1.16785	-0.998367	-0.876877	0.905507	1.00775	1.14616	1.18137	1.22049	1.24185	1.26462	1.31533	1.37507	1.44809
25	4426	-2.89663	-2.36533	-1.91952	-1.68995	-1.53823	-1.42613	-1.33763	-1.26478	-1.23271	-1.20299	-1.14943	-1.10218	-0.925235	-0.802756	0.840154	0.943945	1.09059	1.12913	1.17252	1.19647	1.22222	1.28036	1.35045	1.43858
26	4604	-2.49058	-2.16217	-1.8582	-1.68874	-1.57086	-1.48026	-1.40656	-1.34442	-1.31663	-1.29063	-1.24315	-1.20057	-1.03489	-0.914265	0.997612	1.12038	1.29161	1.33616	1.38613	1.41362	1.44307	1.50927	1.58841	1.68686
27	4782	-3.38116	-2.7877	-2.28765	-2.02712	-1.85394	-1.72482	-1.62229	-1.53751	-1.50006	-1.46528	-1.40242	-1.34675	-1.13639	-0.98923	0.991434	1.10708	1.26658	1.30773	1.35371	1.37892	1.40589	1.46634	1.53837	1.62765
28	4960	-1.88871	-1.62524	-1.38348	-1.24989	-1.15766	-1.08719	-1.03016	-0.982195	-0.96078	-0.940766	-0.904272	-0.871605	-0.745208	-0.653933	0.708459	0.787474	0.894662	0.921984	0.952338	0.968898	0.986553	1.02584	1.07212	1.12874
29	5138	-3.62261	-3.13057	-2.67853	-2.42776	-2.25429	-2.12152	-2.01402	-1.92363	-1.88326	-1.84551	-1.77665	-1.71502	-1.47632	-1.30375	1.2792	1.43065	1.63703	1.68974	1.74842	1.78047	1.81465	1.89078	1.98062	2.09064
30	5316	-2.08113	-1.81253	-1.56232	-1.4215	-1.32309	-1.24735	-1.18564	-1.13339	-1.10997	-1.08803	-1.04789	-1.01182	-0.871045	-0.768224	0.817785	0.909976	1.03461	1.0663	1.10147	1.12067	1.14113	1.18667	1.24029	1.3057
31	5494	-2.72409	-2.38478	-2.06381	-1.88177	-1.75421	-1.6558	-1.57547	-1.50753	-1.47707	-1.44853	-1.39625	-1.34927	-1.16564	-1.03146	1.11283	1.25212	1.44697	1.49782	1.55493	1.58638	1.62012	1.69609	1.78711	1.90067
32	5672	-2.45545	-2.13563	-1.83904	-1.67288	-1.55745	-1.46871	-1.39644	-1.33536	-1.30799	-1.28235	-1.23546	-1.1934	-1.02947	-0.909949	0.957355	1.07099	1.22691	1.26697	1.31164	1.3361	1.36222	1.42064	1.48988	1.57518
33	5850	-3.60168	-3.14241	-2.7131	-2.47145	-2.30268	-2.17285	-2.06694	-1.97738	-1.93724	-1.89963	-1.83087	-1.76913	-1.52812	-1.35216	1.34638	1.4994	1.70497	1.75695	1.81454	1.84589	1.87927	1.95336	2.04026	2.14573
34	6028	-4.18663	-3.61245	-3.09172	-2.80429	-2.60576	-2.45402	-2.33112	-2.22758	-2.18128	-2.138	-2.05903	-1.98831	-1.71399	-1.51546	1.47034	1.6401	1.86858	1.92637	1.99038	2.02523	2.06231	2.14459	2.24106	2.35829
35	6206	-6.19312	-5.41886	-4.69326	-4.28389	-3.99795	-3.77719	-3.5972	-3.44485	-3.37657	-3.31263	-3.19567	-3.09064	-2.68084	-2.38161	2.27433	2.55045	2.92646	3.02252	3.12934	3.18768	3.2499	3.3886	3.55247	3.75324
36	6384	-3.88775	-3.38714	-2.92124	-2.65896	-2.47599	-2.33553	-2.22119	-2.1246	-2.08137	-2.0409	-1.96693	-1.90052	-1.64162	-1.45329	1.43201	1.59849	1.82305	1.88	1.94315	1.97753	2.01413	2.0954	2.19081	2.30685
37	6562	-3.38033	-2.93566	-2.52596	-2.29731	-2.1385	-2.01656	-1.91729	-1.83343	-1.79589	-1.76075	-1.69653	-1.63895	-1.41472	-1.25129	1.24352	1.38434	1.57312	1.62079	1.67355	1.70227	1.73283	1.8006	1.87995	1.97613
38	6740	-2.70306	-2.3688	-2.05573	-1.87899	-1.75503	-1.65922	-1.5808	-1.51429	-1.48443	-1.45641	-1.40503	-1.35876	-1.17715	-1.04339	1.06983	1.19118	1.35448	1.39583	1.44165	1.46661	1.49316	1.55209	1.62121	1.70523
39	6918	-2.16658	-1.91691	-1.67537	-1.53572	-1.43666	-1.35969	-1.29646	-1.24265	-1.21843	-1.19569	-1.15398	-1.11638	-0.968242	-0.858771	0.879574	0.97785	1.10921	1.14224	1.17875	1.1986	1.21969	1.26637	1.32092	1.38692
40	7096	-3.29857	-2.84316	-2.42516	-2.19386	-2.03398	-1.91226	-1.81388	-1.73129	-1.69444	-1.66001	-1.59732	-1.5413	-1.32521	-1.16952	1.17951	1.32919	1.53852	1.59311	1.65436	1.68805	1.72418	1.8054	1.90268	2.0238
41	7274	-2.99803	-2.60703	-2.24342	-2.03946	-1.89729	-1.78798	-1.69905	-1.62395	-1.59032	-1.55884	-1.50134	-1.44977	-1.24919	-1.10333	1.10166	1.22595	1.39271	1.43484	1.48149	1.50686	1.53386	1.5938	1.66413	1.74949
42	7452	-3.45299	-2.89601	-2.4146	-2.15945	-1.98767	-1.85894	-1.75601	-1.67033	-1.63233	-1.59696	-1.53281	-1.47577	-1.25795	-1.10349	1.04969	1.16776	1.32595	1.36587	1.41002	1.43402	1.45955	1.51618	1.58246	1.66279
43	7630	-3.07918	-2.66745	-2.28786	-2.07609	-1.92883	-1.81601	-1.72446	-1.64728	-1.61278	-1.58051	-1.52157	-1.46874	-1.2637	-1.11493	1.10746	1.23137	1.39715	1.43895	1.48519	1.51031	1.53699	1.59614	1.66537	1.74914
44	7808	-3.96853	-3.39365	-2.87493	-2.59109	-2.39641	-2.2484	-2.12906	-2.02903	-1.98448	-1.94291	-1.86725	-1.79976	-1.54063	-1.35523	1.28591	1.4321	1.6287	1.67843	1.73353	1.76352	1.79543	1.8663	1.94946	2.05055
45	7986	-3.41439	-2.93059	-2.48952	-2.2465	-2.07923	-1.95175	-1.84884	-1.76253	-1.72408	-1.6882	-1.62284	-1.56447	-1.33953	-1.17794	1.14088	1.26651	1.43414	1.47629	1.52285	1.54814	1.57501	1.63454	1.70409	1.78817
46	8164	-2.88101	-2.49152	-2.13158	-1.93077	-1.79165	-1.68515	-1.59887	-1.52629	-1.49388	-1.46358	-1.40829	-1.35878	-1.16686	-1.02807	1.01476	1.1289	1.2826	1.32151	1.36461	1.38805	1.41299	1.46831	1.53318	1.61201
47	8342	-3.00772	-2.57394	-2.18156	-1.96621	-1.81824	-1.70579	-1.61503	-1.53896	-1.50509	-1.4735	-1.41602	-1.36471	-1.16726	-1.02571	1.02457	1.14591	1.3126	1.35545	1.40324	1.4294	1.45735	1.51982	1.59386	1.68487
48	8520	-2.36154	-2.02717	-1.72163	-1.55328	-1.4373	-1.34895	-1.27752	-1.21758	-1.19085	-1.16589	-1.12047	-1.07991	-0.923784	-0.811678	0.821488	0.914749	1.04124	1.07343	1.10918	1.12868	1.14946	1.19567	1.25006	1.31638
49	8698	-4.01594	-3.46282	-2.95473	-2.67334	-2.47861	-2.32961	-2.20896	-2.10752	-2.0622	-2.01986	-1.94266	-1.87363	-1.60684	-1.41452	1.41367	1.5784	1.80344	1.8611	1.92532	1.96041	1.99786	2.08139	2.1802	2.30136
50	8876	-2.67501	-2.25371	-1.88378	-1.68576	-1.55157	-1.45057	-1.36973	-1.30233	-1.27241	-1.24455	-1.19402	-1.14911	-0.977856	-0.856619	0.90426	1.02357	1.19488	1.24042	1.29199	1.32055	1.35134	1.42121	1.50588	1.61283
51	9054	-4.28448	-3.55617	-2.93037	-2.60233	-2.38299	-2.21946	-2.08951	-1.98206	-1.93462	-1.89059	-1.81101	-1.74062	-1.47508	-1.28985	1.31844	1.49683	1.75423	1.82287	1.90066	1.94381	1.99034	2.09601	2.22432	2.38686
52	9232	-6.81593	-5.30428	-4.09786	-3.50532	-3.1272	-2.85523	-2.64562	-2.47651	-2.40304	-2.33551	-2.21514	-2.11042	-1.73035	-1.479	1.35366	1.52216	1.76189	1.8252	1.89664	1.93611	1.97862	2.0748	2.19096	2.33711
53	9410	-4.19795	-3.42267	-2.77043	-2.43477	-2.21368	-2.05061	-1.92214	-1.81655	-1.7701	-1.72708	-1.64954	-1.5812	-1.32587	-1.15004	1.14412	1.28712	1.48937	1.5425	1.60232	1.63531	1.67074	1.75068	1.84689	1.96738
54	9430	-5.03034	-3.86497	-2.95138	-2.50906	-2.22843	-2.02733	-1.8728	-1.74842	-1.69451	-1.64504	-1.557	-1.48058	-1.20464	-1.02349	0.933151	1.04105	1.1912	1.23018	1.27386	1.29786	1.32358	1.38135	1.45032	1.53594
55	0	0.005	0.01	0.02	0.03	0.04	0.05	0.06	0.07	0.075	0.08	0.09	0.1	0.15	0.2	0.8	0.85	0.9	0.91	0.92	0.925	0.93	0.94	0.95	0.96
