# Supplementary material for: Time-varying asymmetry and tail thickness in long series of daily financial returns
Source: publisher site journal article supplement (doi:10.1515/snde-2017-0071), 2018-10-02
Supplement: Supplementary file 481 [file pred_es_H4.xlsx]

## Sheet: 1
	Var1	Var2	Var3	Var4	Var5	Var6	Var7	Var8	Var9	Var10	Var11	Var12	Var13	Var14	Var15	Var16	Var17	Var18	Var19	Var20	Var21	Var22	Var23	Var24	Var25
1	154	-15.5807	-11.2475	-8.10343	-6.67134	-5.79881	-5.19271	-4.73782	-4.37902	-4.22557	-4.08582	-3.83969	-3.62879	-2.88965	-2.42414	2.05898	2.32284	2.70444	2.8065	2.92241	2.98681	3.05643	3.21511	3.40894	3.65685
2	332	-6.18363	-4.47889	-3.24552	-2.68573	-2.34529	-2.10829	-1.93019	-1.78933	-1.72898	-1.67391	-1.57664	-1.49299	-1.19668	-1.00676	1.0952	1.23563	1.44178	1.49766	1.56154	1.59723	1.63598	1.72492	1.83483	1.97741
3	510	-3.08316	-2.38693	-1.85506	-1.59946	-1.43718	-1.32039	-1.22996	-1.15653	-1.12447	-1.0949	-1.04191	-0.995533	-0.824062	-0.707307	0.767386	0.855198	0.978588	1.01093	1.04733	1.06741	1.08898	1.13763	1.19615	1.26961
4	688	-2.799	-2.12288	-1.61637	-1.37724	-1.22717	-1.12022	-1.0382	-0.972204	-0.943583	-0.917281	-0.870409	-0.829618	-0.681344	-0.58288	0.532261	0.596694	0.687785	0.711775	0.738836	0.753797	0.769915	0.80641	0.850591	0.906476
5	866	-4.53422	-3.54173	-2.76618	-2.38669	-2.14372	-1.96803	-1.8319	-1.72156	-1.67344	-1.62908	-1.54967	-1.48021	-1.22488	-1.05262	1.01086	1.12834	1.29157	1.33392	1.38136	1.40742	1.43537	1.49816	1.57332	1.6669
6	1044	-3.18442	-2.43042	-1.86239	-1.59363	-1.42483	-1.30429	-1.21167	-1.13703	-1.1046	-1.07478	-1.02156	-0.975172	-0.805947	-0.692812	0.678224	0.757714	0.867681	0.896151	0.928035	0.945532	0.964274	1.00637	1.0566	1.11899
7	1222	-3.34469	-2.68967	-2.15565	-1.88635	-1.71065	-1.58169	-1.48048	-1.39748	-1.36103	-1.3273	-1.26656	-1.21309	-1.01346	-0.875838	0.925223	1.03163	1.17888	1.21698	1.25959	1.28299	1.30804	1.36416	1.43105	1.51401
8	1400	-5.48525	-4.25411	-3.27711	-2.79847	-2.49306	-2.27288	-2.10256	-1.96479	-1.90487	-1.8497	-1.75114	-1.6652	-1.35184	-1.14324	1.30611	1.47399	1.72318	1.79099	1.86855	1.91191	1.95896	2.06683	2.19963	2.37068
9	1578	-2.92406	-2.45052	-2.03993	-1.82127	-1.67375	-1.56288	-1.47421	-1.40038	-1.36761	-1.33711	-1.28175	-1.23251	-1.04428	-0.910498	0.982764	1.09398	1.24754	1.28723	1.33163	1.356	1.38209	1.44059	1.51035	1.59686
10	1756	-3.24155	-2.76492	-2.33488	-2.10046	-1.94	-1.81818	-1.72002	-1.63778	-1.60117	-1.56703	-1.50492	-1.44956	-1.23697	-1.08495	1.15574	1.29008	1.47362	1.52061	1.57292	1.6015	1.63202	1.70009	1.78059	1.87948
11	1934	-2.65454	-2.23096	-1.86378	-1.66858	-1.53681	-1.43786	-1.3588	-1.29301	-1.26385	-1.23671	-1.18747	-1.14372	-0.976918	-0.85868	0.914845	1.03199	1.19668	1.23977	1.28821	1.31489	1.34354	1.40806	1.48546	1.5822
12	2112	-3.54882	-2.73828	-2.11021	-1.80826	-1.61672	-1.47929	-1.37347	-1.288	-1.25085	-1.2167	-1.15575	-1.10263	-0.908705	-0.779235	0.771528	0.866975	1.00257	1.03837	1.07879	1.10114	1.12522	1.17977	1.24584	1.32937
13	2290	-3.4563	-2.77969	-2.23368	-1.95901	-1.77972	-1.64813	-1.54484	-1.4601	-1.42287	-1.38843	-1.32646	-1.27187	-1.06771	-0.926718	0.935869	1.04429	1.19379	1.23241	1.27559	1.29929	1.32466	1.38159	1.44948	1.53377
14	2468	-3.28926	-2.6532	-2.12968	-1.86345	-1.68911	-1.56094	-1.46024	-1.37766	-1.34142	-1.30789	-1.24758	-1.1945	-0.996671	-0.860805	0.865296	0.966942	1.10807	1.14466	1.18561	1.20811	1.23222	1.28641	1.35114	1.43155
15	2646	-2.51866	-2.09321	-1.73072	-1.54061	-1.41352	-1.3186	-1.24314	-1.1806	-1.15294	-1.12721	-1.08064	-1.03933	-0.88274	-0.772582	0.833047	0.943877	1.10322	1.14563	1.19365	1.22026	1.24895	1.31408	1.39311	1.49334
16	2824	-3.58018	-2.81957	-2.21185	-1.91259	-1.72049	-1.58131	-1.47308	-1.38504	-1.34661	-1.31117	-1.24768	-1.19212	-0.987474	-0.849098	0.862394	0.966399	1.1128	1.15121	1.19447	1.21833	1.244	1.30197	1.37185	1.45965
17	3002	-4.10405	-3.11515	-2.37243	-2.02078	-1.80027	-1.64321	-1.52274	-1.42573	-1.38361	-1.34492	-1.27593	-1.2159	-0.997509	-0.852143	0.842012	0.939454	1.07567	1.11124	1.1512	1.17321	1.19686	1.25012	1.31409	1.39422
18	3180	-2.96896	-2.56374	-2.19084	-1.98463	-1.84213	-1.73324	-1.64506	-1.57085	-1.5377	-1.50672	-1.45019	-1.39961	-1.20378	-1.06222	1.14429	1.28306	1.47481	1.52439	1.57979	1.61016	1.64266	1.71548	1.80205	1.90898
19	3358	-2.92379	-2.25913	-1.75048	-1.50531	-1.34963	-1.23762	-1.15101	-1.08083	-1.05025	-1.02209	-0.971735	-0.927777	-0.766582	-0.658091	0.708707	0.80164	0.937211	0.973676	1.0152	1.03831	1.06332	1.12039	1.19029	1.27995
20	3536	-2.08953	-1.68217	-1.34448	-1.1725	-1.05977	-0.977038	-0.912183	-0.859101	-0.835833	-0.814324	-0.775659	-0.741677	-0.615407	-0.528967	0.557928	0.620262	0.706405	0.728672	0.753584	0.767257	0.781905	0.814775	0.853952	0.902582
21	3714	-1.75103	-1.40204	-1.11836	-0.975485	-0.882236	-0.813926	-0.760352	-0.71651	-0.697272	-0.679478	-0.647464	-0.619296	-0.51437	-0.44231	0.491294	0.546099	0.621919	0.641535	0.663486	0.675537	0.688437	0.717377	0.751867	0.794659
22	3892	-2.6242	-2.20421	-1.83647	-1.63992	-1.50713	-1.4072	-1.32728	-1.26075	-1.23125	-1.20382	-1.15408	-1.10989	-0.941321	-0.822019	0.862569	0.960529	1.09446	1.1288	1.16707	1.18799	1.21034	1.2603	1.31951	1.39232
23	4070	-2.67494	-2.26814	-1.90533	-1.70864	-1.57471	-1.47351	-1.39225	-1.32438	-1.29422	-1.26611	-1.21504	-1.16957	-0.995262	-0.871048	0.914585	1.0209	1.16738	1.20513	1.24731	1.27042	1.29513	1.35048	1.41629	1.49763
24	4248	-2.64702	-2.24839	-1.89193	-1.69834	-1.56632	-1.46642	-1.38626	-1.3193	-1.28955	-1.26182	-1.21142	-1.16654	-0.994557	-0.872072	0.901454	1.00476	1.14568	1.18172	1.22183	1.24375	1.26715	1.31938	1.38119	1.45713
25	4426	-2.98565	-2.42667	-1.9614	-1.72266	-1.56554	-1.44962	-1.35821	-1.28309	-1.25008	-1.21952	-1.16447	-1.11594	-0.934579	-0.809577	0.851221	0.957246	1.10766	1.14729	1.19202	1.21672	1.24331	1.30348	1.37607	1.46738
26	4604	-2.53876	-2.19616	-1.88193	-1.70696	-1.58561	-1.49254	-1.41702	-1.3534	-1.32496	-1.29836	-1.24982	-1.20634	-1.03781	-0.915673	1.00078	1.12497	1.2988	1.34413	1.39498	1.42298	1.45301	1.52061	1.60165	1.70254
27	4782	-3.36028	-2.76218	-2.25718	-1.99497	-1.82093	-1.69168	-1.58928	-1.50468	-1.46736	-1.43273	-1.37017	-1.31484	-1.10652	-0.961453	0.968445	1.08304	1.2425	1.28393	1.33037	1.3559	1.38326	1.44469	1.51811	1.60942
28	4960	-1.94152	-1.66571	-1.4144	-1.27572	-1.18021	-1.1074	-1.04855	-0.999118	-0.977064	-0.956477	-0.918987	-0.885493	-0.756259	-0.66326	0.714349	0.794955	0.904752	0.932816	0.964033	0.981088	0.999293	1.03989	1.08784	1.1466
29	5138	-3.68835	-3.17262	-2.70211	-2.44279	-2.26431	-2.1283	-2.01835	-1.92598	-1.88479	-1.8463	-1.7762	-1.71358	-1.47187	-1.29787	1.28408	1.4373	1.64706	1.70085	1.76078	1.79355	1.82853	1.90658	1.99897	2.11255
30	5316	-2.17531	-1.88664	-1.61979	-1.47063	-1.36678	-1.28712	-1.22238	-1.16771	-1.14325	-1.12036	-1.07854	-1.04104	-0.895176	-0.789082	0.834321	0.929227	1.05801	1.0908	1.12726	1.14716	1.16838	1.21561	1.27131	1.33949
31	5494	-2.78591	-2.43295	-2.0998	-1.91182	-1.78059	-1.67949	-1.5971	-1.52742	-1.49622	-1.46698	-1.4135	-1.36554	-1.17876	-1.04267	1.1174	1.25881	1.45736	1.50931	1.5677	1.59985	1.63435	1.71205	1.80519	1.92146
32	5672	-2.49725	-2.16859	-1.86373	-1.69328	-1.57483	-1.48388	-1.40998	-1.34761	-1.31969	-1.29356	-1.2458	-1.20296	-1.03636	-0.915279	0.965776	1.08124	1.24023	1.28119	1.3269	1.35196	1.37877	1.43878	1.51005	1.59804
33	5850	-3.62845	-3.15934	-2.72022	-2.47347	-2.30155	-2.16965	-2.06245	-1.97192	-1.93139	-1.89343	-1.82406	-1.76185	-1.51971	-1.34352	1.33774	1.49153	1.69905	1.7517	1.81016	1.84203	1.87596	1.95136	2.03999	2.14797
34	6028	-4.26298	-3.66418	-3.12493	-2.82884	-2.62468	-2.46889	-2.34286	-2.237	-2.18978	-2.14566	-2.06531	-1.99348	-1.71582	-1.51532	1.47486	1.64651	1.87817	1.93698	2.00225	2.03781	2.07568	2.1598	2.25871	2.37925
35	6206	-6.27072	-5.46212	-4.71059	-4.28978	-3.99727	-3.77244	-3.58985	-3.43568	-3.36666	-3.30206	-3.18399	-3.07812	-2.66596	-2.36588	2.25592	2.53233	2.90969	3.00622	3.11377	3.17254	3.2353	3.37535	3.54098	3.74448
36	6384	-3.99863	-3.47361	-2.98694	-2.71512	-2.52611	-2.38094	-2.2628	-2.1632	-2.11866	-2.07702	-2.001	-1.93288	-1.66835	-1.47625	1.44741	1.61721	1.84691	1.90523	1.96988	2.00511	2.04262	2.12598	2.22398	2.34342
37	6562	-3.45619	-2.99322	-2.56792	-2.33146	-2.16739	-2.04185	-1.94004	-1.85423	-1.81585	-1.77994	-1.71438	-1.65566	-1.42752	-1.26176	1.25392	1.39701	1.5893	1.63795	1.69182	1.72116	1.7524	1.82177	1.90312	2.00208
38	6740	-2.74679	-2.40094	-2.07958	-1.89856	-1.77193	-1.67402	-1.59403	-1.52627	-1.49586	-1.46734	-1.41509	-1.3681	-1.18398	-1.04876	1.07051	1.19255	1.35721	1.39897	1.44526	1.47048	1.49735	1.55705	1.62723	1.71268
39	6918	-2.20304	-1.94309	-1.69211	-1.54819	-1.44646	-1.36758	-1.303	-1.2481	-1.22343	-1.20027	-1.15782	-1.11958	-0.969406	-0.858802	0.88503	0.984251	1.11722	1.15075	1.18782	1.20797	1.22941	1.27689	1.33252	1.40001
40	7096	-3.31969	-2.85097	-2.42489	-2.19007	-2.02852	-1.90554	-1.80621	-1.72288	-1.68573	-1.65105	-1.58788	-1.53147	-1.31427	-1.1585	1.17557	1.32517	1.53476	1.58947	1.65088	1.68467	1.72095	1.80254	1.90029	2.02213
41	7274	-3.0487	-2.64525	-2.27208	-2.06297	-1.91774	-1.80643	-1.71602	-1.63979	-1.60568	-1.57378	-1.51548	-1.4632	-1.26026	-1.11312	1.10056	1.22601	1.39484	1.43756	1.48489	1.51066	1.53807	1.59892	1.6703	1.75692
42	7452	-3.50041	-2.929	-2.43486	-2.17342	-1.99796	-1.8665	-1.76167	-1.67453	-1.63592	-1.60001	-1.53494	-1.47711	-1.25693	-1.10113	1.05553	1.17462	1.33492	1.37551	1.42049	1.44497	1.47104	1.52892	1.59687	1.67953
43	7630	-3.1367	-2.71359	-2.32291	-2.10551	-1.95454	-1.83904	-1.74536	-1.6665	-1.63129	-1.59839	-1.53831	-1.48451	-1.27625	-1.12564	1.11159	1.23707	1.40552	1.44807	1.49513	1.52071	1.54791	1.60821	1.6789	1.76466
44	7808	-4.00575	-3.41754	-2.88892	-2.60015	-2.40266	-2.25277	-2.13219	-2.03132	-1.98645	-1.9446	-1.86847	-1.80059	-1.53997	-1.35374	1.29212	1.43968	1.63887	1.68941	1.74546	1.776	1.80851	1.8808	1.96586	2.06951
45	7986	-3.45328	-2.95808	-2.50691	-2.25927	-2.08928	-1.96008	-1.85584	-1.76846	-1.72952	-1.69319	-1.62708	-1.5681	-1.34117	-1.17857	1.13715	1.2632	1.4318	1.47433	1.52139	1.54698	1.5742	1.63453	1.70512	1.79073
46	8164	-2.91897	-2.51936	-2.15057	-1.94568	-1.80396	-1.69578	-1.6081	-1.53436	-1.50145	-1.47071	-1.4146	-1.3644	-1.17034	-1.0305	1.01546	1.13049	1.28588	1.3253	1.36898	1.39275	1.41806	1.47424	1.54024	1.62069
47	8342	-3.03956	-2.5985	-2.19809	-1.97894	-1.82861	-1.71437	-1.62239	-1.54536	-1.51105	-1.47905	-1.4208	-1.36882	-1.16904	-1.02631	1.02866	1.15143	1.32049	1.36405	1.41265	1.43927	1.46776	1.53154	1.60738	1.70097
48	8520	-2.40577	-2.06232	-1.74929	-1.57685	-1.45813	-1.3677	-1.29476	-1.23355	-1.20628	-1.18084	-1.13452	-1.09317	-0.934141	-0.820151	0.828221	0.922904	1.05156	1.08437	1.12083	1.14071	1.1619	1.2091	1.2648	1.33287
49	8698	-4.06512	-3.49857	-2.98077	-2.69411	-2.49596	-2.34488	-2.22269	-2.12012	-2.07439	-2.03168	-1.95392	-1.88442	-1.61606	-1.42294	1.40544	1.57151	1.79877	1.857	1.92183	1.95728	1.99513	2.07965	2.17968	2.30262
50	8876	-2.71025	-2.28311	-1.90729	-1.70557	-1.56892	-1.46608	-1.38376	-1.31528	-1.28492	-1.25666	-1.2054	-1.15983	-0.986138	-0.863433	0.909417	1.03006	1.20364	1.24984	1.30215	1.33114	1.36242	1.43339	1.51953	1.62861
51	9054	-4.30027	-3.56621	-2.93559	-2.60373	-2.38222	-2.21742	-2.0867	-1.97869	-1.93103	-1.8868	-1.80691	-1.73624	-1.46975	-1.2842	1.31669	1.49529	1.75358	1.82252	1.90072	1.94411	1.99095	2.0974	2.22672	2.39075
52	9232	-6.86906	-5.33455	-4.11476	-3.51748	-3.1364	-2.86255	-2.65151	-2.48116	-2.40718	-2.33919	-2.21801	-2.11261	-1.73039	-1.47791	1.34961	1.51891	1.7605	1.82444	1.89666	1.93662	1.97965	2.07719	2.19512	2.3437
53	9410	-4.22845	-3.44705	-2.79058	-2.45195	-2.22852	-2.06368	-1.93389	-1.82729	-1.78042	-1.73699	-1.65879	-1.58988	-1.33251	-1.15538	1.14798	1.29243	1.49711	1.55093	1.61157	1.64504	1.68103	1.76225	1.86001	1.9826
54	9430	-5.19779	-3.97327	-3.02036	-2.56149	-2.27204	-2.06532	-1.90673	-1.77932	-1.72413	-1.67348	-1.58339	-1.50523	-1.22344	-1.03887	0.945977	1.05675	1.21186	1.25233	1.29775	1.32274	1.34955	1.4099	1.48222	1.57239
55	0	0.005	0.01	0.02	0.03	0.04	0.05	0.06	0.07	0.075	0.08	0.09	0.1	0.15	0.2	0.8	0.85	0.9	0.91	0.92	0.925	0.93	0.94	0.95	0.96
