# Supplementary material for: Time-varying asymmetry and tail thickness in long series of daily financial returns
Source: publisher site journal article supplement (doi:10.1515/snde-2017-0071), 2018-10-02
Supplement: Supplementary file 483 [file pred_es_H5.xlsx]

## Sheet: 1
	Var1	Var2	Var3	Var4	Var5	Var6	Var7	Var8	Var9	Var10	Var11	Var12	Var13	Var14	Var15	Var16	Var17	Var18	Var19	Var20	Var21	Var22	Var23	Var24	Var25
1	154	-16.3503	-11.7627	-8.44458	-6.93701	-6.0213	-5.38638	-4.91062	-4.53552	-4.37517	-4.22917	-3.97225	-3.75227	-2.9827	-2.49983	2.12102	2.39787	2.80097	2.90922	3.03248	3.10108	3.17529	3.34464	3.55213	3.81853
2	332	-6.25564	-4.53604	-3.28515	-2.71714	-2.37163	-2.13112	-1.95039	-1.8074	-1.74609	-1.69017	-1.59145	-1.5066	-1.20647	-1.01431	1.10205	1.24411	1.45314	1.5099	1.57478	1.61105	1.65042	1.74079	1.85254	1.99756
3	510	-3.17829	-2.45616	-1.90607	-1.64168	-1.47388	-1.35306	-1.25955	-1.18374	-1.15066	-1.12017	-1.06556	-1.01777	-0.841422	-0.721512	0.781367	0.872117	1.00016	1.03379	1.07166	1.09257	1.11505	1.16587	1.22718	1.30432
4	688	-2.83065	-2.14684	-1.6326	-1.39036	-1.23851	-1.13026	-1.04719	-0.980327	-0.951321	-0.924677	-0.877192	-0.835885	-0.685882	-0.586349	0.537544	0.603373	0.696917	0.721626	0.749555	0.765005	0.781656	0.819435	0.865217	0.923188
5	866	-4.61669	-3.60535	-2.8121	-2.42524	-2.17797	-1.99931	-1.86073	-1.74826	-1.69918	-1.65393	-1.57297	-1.50221	-1.24225	-1.06712	1.02404	1.14379	1.31053	1.35389	1.40254	1.42928	1.45798	1.52253	1.59984	1.69626
6	1044	-3.26753	-2.48573	-1.90033	-1.62425	-1.45116	-1.32764	-1.23273	-1.15627	-1.12307	-1.09258	-1.0382	-0.990833	-0.818221	-0.702995	0.688016	0.769209	0.881988	0.911238	0.944029	0.962065	0.981408	1.02488	1.07692	1.1418
7	1222	-3.40016	-2.73111	-2.18768	-1.91374	-1.73517	-1.60399	-1.50093	-1.41643	-1.37931	-1.34497	-1.28318	-1.22879	-1.02599	-0.886414	0.938615	1.04721	1.19779	1.23679	1.28043	1.30439	1.33005	1.38763	1.4564	1.54187
8	1400	-5.44336	-4.21822	-3.24816	-2.77284	-2.46956	-2.25108	-2.08223	-1.94562	-1.88617	-1.83146	-1.73378	-1.64857	-1.33812	-1.13154	1.29344	1.46066	1.70928	1.77703	1.85456	1.8979	1.94492	2.05276	2.18568	2.3572
9	1578	-2.98751	-2.4904	-2.06542	-1.84117	-1.69043	-1.57749	-1.48723	-1.4121	-1.37878	-1.34775	-1.29147	-1.24146	-1.05076	-0.915718	0.987457	1.0996	1.25466	1.29481	1.33976	1.36442	1.39085	1.45016	1.52093	1.60869
10	1756	-3.29642	-2.80688	-2.36784	-2.12792	-1.96367	-1.83916	-1.73889	-1.65493	-1.61757	-1.58276	-1.51944	-1.46302	-1.24668	-1.09258	1.16375	1.29998	1.48659	1.53447	1.58785	1.61708	1.6483	1.71797	1.80053	1.90208
11	1934	-2.70209	-2.26036	-1.88036	-1.67917	-1.54404	-1.4429	-1.36223	-1.29524	-1.26559	-1.238	-1.188	-1.14364	-0.974851	-0.855691	0.914011	1.0326	1.20013	1.24412	1.29367	1.321	1.35038	1.41665	1.49639	1.59635
12	2112	-3.71895	-2.8503	-2.18562	-1.86792	-1.66746	-1.52403	-1.41367	-1.32466	-1.28602	-1.25051	-1.18721	-1.13211	-0.931565	-0.798166	0.791158	0.89011	1.03156	1.06908	1.11153	1.13504	1.16039	1.21787	1.28764	1.37604
13	2290	-3.53154	-2.83473	-2.27183	-1.98861	-1.80417	-1.66928	-1.56368	-1.47712	-1.43915	-1.40404	-1.34088	-1.2853	-1.07782	-0.934776	0.947545	1.05878	1.21332	1.25346	1.29848	1.32324	1.3498	1.40948	1.48094	1.56989
14	2468	-3.40696	-2.73993	-2.19176	-1.91413	-1.73253	-1.5994	-1.49505	-1.40962	-1.37215	-1.3375	-1.27518	-1.22041	-1.01684	-0.877481	0.883718	0.988947	1.13602	1.17431	1.21726	1.2409	1.26626	1.32326	1.39149	1.47644
15	2646	-2.49682	-2.07491	-1.7144	-1.52542	-1.39901	-1.30447	-1.22924	-1.16687	-1.13929	-1.11366	-1.06724	-1.02611	-0.870337	-0.76107	0.820745	0.930947	1.08946	1.13167	1.17949	1.20601	1.23463	1.29965	1.37863	1.47885
16	2824	-3.74674	-2.93587	-2.29401	-1.97906	-1.77724	-1.63127	-1.51815	-1.42631	-1.38624	-1.3493	-1.28317	-1.22537	-1.01318	-0.870332	0.885054	0.992925	1.14546	1.18559	1.23082	1.2558	1.28268	1.34352	1.41699	1.50963
17	3002	-4.17961	-3.16348	-2.40373	-2.04554	-1.82126	-1.66143	-1.53889	-1.4403	-1.39755	-1.35825	-1.28823	-1.22733	-1.00598	-0.858767	0.851625	0.951654	1.09248	1.12944	1.17105	1.19401	1.21869	1.27449	1.34185	1.42664
18	3180	-3.017	-2.59554	-2.2109	-1.99875	-1.8528	-1.74155	-1.65168	-1.57618	-1.5425	-1.51105	-1.4537	-1.40244	-1.20429	-1.06151	1.14493	1.28524	1.47995	1.53039	1.58682	1.61779	1.65096	1.72537	1.81403	1.92388
19	3358	-3.04388	-2.34565	-1.81089	-1.55385	-1.39122	-1.27442	-1.18421	-1.11125	-1.0795	-1.05027	-0.998065	-0.952534	-0.785844	-0.674007	0.724606	0.820685	0.961298	0.999214	1.04243	1.06651	1.09259	1.15225	1.2255	1.31965
20	3536	-2.17459	-1.74156	-1.38598	-1.20611	-1.08874	-1.00285	-0.935644	-0.880637	-0.856525	-0.834242	-0.794211	-0.759063	-0.628743	-0.539938	0.567788	0.632104	0.721431	0.744635	0.770632	0.784921	0.800245	0.834689	0.875878	0.927132
21	3714	-1.80714	-1.44388	-1.14782	-0.99896	-0.902129	-0.83132	-0.77587	-0.730552	-0.7107	-0.692348	-0.659361	-0.630369	-0.522653	-0.448909	0.498083	0.554163	0.632085	0.652314	0.674984	0.687444	0.700796	0.730798	0.766676	0.811351
22	3892	-2.65095	-2.21254	-1.83264	-1.63097	-1.49534	-1.39384	-1.31292	-1.24568	-1.21592	-1.18827	-1.13818	-1.09377	-0.925305	-0.806675	0.844159	0.941655	1.07605	1.11071	1.14945	1.1707	1.19343	1.24436	1.30494	1.37979
23	4070	-2.6753	-2.25457	-1.88301	-1.68329	-1.54785	-1.44575	-1.36399	-1.2959	-1.26568	-1.23755	-1.18649	-1.14114	-0.96832	-0.846081	0.89168	0.996966	1.14302	1.18087	1.22323	1.24649	1.27141	1.32731	1.39404	1.47683
24	4248	-2.68493	-2.2736	-1.9057	-1.70687	-1.57184	-1.46991	-1.38812	-1.31998	-1.28974	-1.26159	-1.2105	-1.16506	-0.991472	-0.868233	0.895537	0.999512	1.14223	1.1789	1.21981	1.24222	1.26617	1.31973	1.38334	1.46173
25	4426	-3.04522	-2.46937	-1.99145	-1.74671	-1.58588	-1.46734	-1.37402	-1.29737	-1.26368	-1.23248	-1.17629	-1.12682	-0.942305	-0.815511	0.85971	0.967833	1.12195	1.16271	1.20873	1.23417	1.26157	1.32364	1.39875	1.49354
26	4604	-2.60198	-2.23881	-1.90831	-1.72658	-1.60137	-1.50589	-1.42861	-1.36361	-1.33459	-1.30748	-1.25807	-1.21388	-1.04289	-0.91928	1.0028	1.12827	1.30452	1.35057	1.40229	1.43075	1.4613	1.53003	1.61235	1.71497
27	4782	-3.36813	-2.75098	-2.23595	-1.97068	-1.79522	-1.66514	-1.56243	-1.47773	-1.44041	-1.4058	-1.34336	-1.28828	-1.08125	-0.937689	0.947189	1.06123	1.22105	1.26281	1.30971	1.33553	1.36325	1.42571	1.50066	1.59433
28	4960	-1.9898	-1.70097	-1.43977	-1.29653	-1.19812	-1.12329	-1.06293	-1.01233	-0.989773	-0.96872	-0.930395	-0.896197	-0.764513	-0.669998	0.720526	0.80261	0.914995	0.94381	0.975895	0.993433	1.01215	1.05395	1.10337	1.16404
29	5138	-3.76432	-3.22135	-2.73133	-2.46372	-2.28003	-2.14049	-2.02797	-1.93368	-1.89168	-1.85248	-1.78117	-1.7175	-1.47251	-1.29695	1.28288	1.43751	1.64985	1.70445	1.76536	1.79873	1.83439	1.91419	2.00888	2.12555
30	5316	-2.24641	-1.94468	-1.66643	-1.51144	-1.40361	-1.32096	-1.25394	-1.19747	-1.17223	-1.14862	-1.10548	-1.06681	-0.916562	-0.807505	0.851564	0.949349	1.08264	1.11668	1.15453	1.17519	1.19722	1.24633	1.30434	1.37546
31	5494	-2.83451	-2.47125	-2.12851	-1.93576	-1.80128	-1.69783	-1.61371	-1.54266	-1.51084	-1.48106	-1.42664	-1.37786	-1.18824	-1.05049	1.12094	1.26349	1.46403	1.51649	1.57546	1.60792	1.6428	1.72135	1.81563	1.93351
32	5672	-2.54662	-2.2081	-1.89285	-1.71664	-1.59445	-1.50075	-1.42478	-1.36081	-1.33222	-1.30548	-1.25665	-1.21292	-1.04346	-0.920595	0.971692	1.08856	1.24996	1.29167	1.33826	1.36381	1.39114	1.45234	1.52508	1.61499
33	5850	-3.67623	-3.18423	-2.73039	-2.47774	-2.30235	-2.16788	-2.05874	-1.96686	-1.92576	-1.88735	-1.81725	-1.75452	-1.51128	-1.33485	1.32633	1.4803	1.68904	1.74221	1.8013	1.83355	1.86795	1.94455	2.03484	2.14515
34	6028	-4.32816	-3.71018	-3.15474	-2.8505	-2.64156	-2.48266	-2.35439	-2.24672	-2.19874	-2.15394	-2.07237	-1.99955	-1.71855	-1.51631	1.47662	1.64975	1.88442	1.94418	2.01057	2.04679	2.08541	2.17136	2.27262	2.39623
35	6206	-6.32189	-5.49381	-4.72563	-4.29739	-3.99999	-3.77155	-3.58595	-3.42955	-3.35964	-3.29425	-3.17487	-3.06797	-2.65318	-2.35233	2.23894	2.51603	2.89611	2.99367	3.10251	3.16205	3.22564	3.36774	3.53611	3.74299
36	6384	-4.10264	-3.55358	-3.04704	-2.76541	-2.57022	-2.42074	-2.2994	-2.19722	-2.15154	-2.10881	-2.03081	-1.96098	-1.69039	-1.49452	1.46604	1.6392	1.87414	1.93399	2.00044	2.03667	2.07527	2.16118	2.26245	2.38598
37	6562	-3.51346	-3.03987	-2.6032	-2.36089	-2.19333	-2.06514	-1.96116	-1.87357	-1.83444	-1.79784	-1.73106	-1.6713	-1.43961	-1.27158	1.26425	1.40958	1.60561	1.65536	1.71055	1.74063	1.77266	1.84391	1.92766	2.02955
38	6740	-2.78523	-2.42763	-2.09743	-1.91241	-1.78326	-1.68372	-1.6025	-1.53377	-1.50295	-1.47407	-1.42123	-1.37374	-1.18802	-1.05187	1.073	1.19636	1.36318	1.40552	1.45252	1.47814	1.50545	1.56618	1.63771	1.72493
39	6918	-2.22485	-1.95883	-1.70322	-1.55669	-1.4533	-1.37326	-1.30777	-1.2522	-1.22723	-1.2038	-1.16087	-1.12223	-0.97079	-0.859543	0.886837	0.986582	1.12037	1.15416	1.19154	1.21187	1.2335	1.28149	1.33777	1.40617
40	7096	-3.33884	-2.86148	-2.42826	-2.18993	-2.02598	-1.90151	-1.80125	-1.71729	-1.67991	-1.64505	-1.58163	-1.52504	-1.30754	-1.15178	1.17063	1.32034	1.53066	1.58559	1.64729	1.68127	1.71774	1.79984	1.89824	2.02095
41	7274	-3.10475	-2.68466	-2.29816	-2.08382	-1.93536	-1.82164	-1.72945	-1.65184	-1.61719	-1.58479	-1.52569	-1.47279	-1.26764	-1.11898	1.10382	1.23043	1.40119	1.44448	1.4925	1.51865	1.54651	1.60838	1.68102	1.76935
42	7452	-3.54592	-2.95787	-2.45272	-2.18661	-2.00807	-1.87459	-1.76815	-1.67976	-1.64062	-1.6042	-1.53824	-1.4797	-1.25724	-1.10035	1.05774	1.1777	1.33972	1.38089	1.42655	1.45143	1.47792	1.53678	1.60598	1.69033
43	7630	-3.19139	-2.75602	-2.35475	-2.13161	-1.97726	-1.85946	-1.76403	-1.68374	-1.64791	-1.61444	-1.55341	-1.49882	-1.28747	-1.13483	1.11861	1.24579	1.41699	1.46036	1.50846	1.53465	1.56253	1.6244	1.69704	1.78526
44	7808	-4.05792	-3.45542	-2.91522	-2.62095	-2.41997	-2.26764	-2.1452	-2.04283	-1.99727	-1.9548	-1.87761	-1.8088	-1.54517	-1.3572	1.29342	1.4421	1.64346	1.69464	1.75145	1.78241	1.8154	1.88877	1.97513	2.08053
45	7986	-3.47232	-2.97013	-2.51383	-2.264	-2.0925	-1.96212	-1.85704	-1.76901	-1.72983	-1.69329	-1.62679	-1.56745	-1.33953	-1.17655	1.13635	1.26363	1.43468	1.47797	1.52589	1.55197	1.57972	1.64134	1.71362	1.80146
46	8164	-2.95042	-2.53739	-2.16105	-1.95262	-1.80901	-1.69948	-1.61087	-1.53645	-1.50326	-1.47225	-1.41573	-1.3652	-1.17018	-1.02983	1.01552	1.13138	1.28815	1.32802	1.37228	1.39639	1.42208	1.47916	1.54628	1.62816
47	8342	-3.07365	-2.62187	-2.21397	-1.9909	-1.83816	-1.72236	-1.62908	-1.55102	-1.51632	-1.48395	-1.4251	-1.37263	-1.17144	-1.02792	1.02981	1.15313	1.32335	1.36731	1.41644	1.44337	1.47218	1.53674	1.61346	1.70824
48	8520	-2.45616	-2.09969	-1.77667	-1.59961	-1.47804	-1.38568	-1.31119	-1.24882	-1.22106	-1.19515	-1.14797	-1.10587	-0.944154	-0.828501	0.834334	0.930367	1.06123	1.09464	1.1318	1.1521	1.17373	1.22198	1.27891	1.34856
49	8698	-4.11586	-3.53144	-2.99959	-2.70694	-2.50591	-2.35281	-2.22924	-2.12559	-2.07939	-2.03628	-1.95778	-1.88768	-1.61776	-1.42391	1.40209	1.56866	1.79741	1.85619	1.92178	1.95767	1.99602	2.0817	2.18323	2.30819
50	8876	-2.77418	-2.3293	-1.93971	-1.73168	-1.59114	-1.48569	-1.40143	-1.33133	-1.30027	-1.27138	-1.21901	-1.17251	-0.995751	-0.871196	0.915669	1.03741	1.21274	1.25939	1.31221	1.34148	1.37306	1.44471	1.53157	1.64141
51	9054	-4.3554	-3.60186	-2.95526	-2.61733	-2.39246	-2.22526	-2.0928	-1.98346	-1.93526	-1.89055	-1.80979	-1.73845	-1.47008	-1.28356	1.31366	1.4927	1.75176	1.82101	1.89961	1.94324	1.99036	2.09754	2.2278	2.39301
52	9232	-6.96963	-5.383	-4.13327	-3.52545	-3.13923	-2.86207	-2.6488	-2.47696	-2.40239	-2.33391	-2.21197	-2.10603	-1.72255	-1.47005	1.34874	1.51958	1.76438	1.82936	1.90288	1.94362	1.98752	2.08709	2.20779	2.36052
53	9410	-4.27089	-3.48037	-2.81487	-2.4714	-2.24464	-2.07743	-1.9458	-1.83773	-1.79025	-1.74631	-1.6672	-1.59756	-1.33789	-1.1596	1.15168	1.29728	1.50402	1.5585	1.6199	1.65379	1.69025	1.77259	1.87181	1.99639
54	9430	-5.27986	-4.03216	-3.06369	-2.59721	-2.3028	-2.09269	-1.93155	-1.80207	-1.74599	-1.69456	-1.60311	-1.52382	-1.23821	-1.05125	0.958488	1.0718	1.23111	1.27279	1.31963	1.34544	1.37314	1.43559	1.51055	1.60421
55	0	0.005	0.01	0.02	0.03	0.04	0.05	0.06	0.07	0.075	0.08	0.09	0.1	0.15	0.2	0.8	0.85	0.9	0.91	0.92	0.925	0.93	0.94	0.95	0.96
