# Supplementary material for: Time-varying asymmetry and tail thickness in long series of daily financial returns
Source: publisher site journal article supplement (doi:10.1515/snde-2017-0071), 2018-10-02
Supplement: Supplementary file 485 [file pred_quant_H1.xlsx]

## Sheet: 1
	Var1	Var2	Var3	Var4	Var5	Var6	Var7	Var8	Var9	Var10	Var11	Var12	Var13	Var14	Var15	Var16	Var17	Var18	Var19	Var20	Var21	Var22	Var23	Var24	Var25
1	154	-6.65029	-4.844	-3.49285	-2.86255	-2.46669	-2.18652	-1.97175	-1.79782	-1.7218	-1.65342	-1.53024	-1.4224	-1.02672	-0.758322	1.02884	1.24609	1.53621	1.60976	1.69121	1.73566	1.78308	1.88849	2.01212	2.16396
2	332	-3.04669	-2.21505	-1.60262	-1.31857	-1.13986	-1.01189	-0.912693	-0.832055	-0.796938	-0.76425	-0.705368	-0.65401	-0.461426	-0.326892	0.631825	0.755179	0.921449	0.963809	1.01117	1.03695	1.06424	1.12542	1.19764	1.28732
3	510	-1.59896	-1.26018	-0.986353	-0.843494	-0.746334	-0.672395	-0.613289	-0.563359	-0.541018	-0.520204	-0.482031	-0.447814	-0.315115	-0.216618	0.511251	0.596794	0.708526	0.736531	0.7672	0.783867	0.80154	0.840396	0.886239	0.941206
4	688	-1.55361	-1.20684	-0.934515	-0.799369	-0.709349	-0.642781	-0.590042	-0.54631	-0.52693	-0.508996	-0.476416	-0.447559	-0.336602	-0.257574	0.283503	0.346702	0.430378	0.451368	0.474522	0.487172	0.500551	0.530153	0.564905	0.606988
5	866	-2.45565	-1.93352	-1.49608	-1.27262	-1.12324	-1.0111	-0.920792	-0.846176	-0.812953	-0.782282	-0.726357	-0.676715	-0.484753	-0.347426	0.637506	0.753223	0.904749	0.942672	0.984456	1.00701	1.03094	1.08377	1.14531	1.21988
6	1044	-1.66936	-1.30203	-1.00938	-0.859107	-0.760719	-0.687654	-0.62958	-0.580871	-0.559538	-0.539552	-0.50378	-0.471637	-0.34901	-0.260299	0.398943	0.478803	0.583582	0.609521	0.638173	0.65367	0.670041	0.706355	0.748713	0.799361
7	1222	-1.95905	-1.58297	-1.26132	-1.08759	-0.969112	-0.879941	-0.807752	-0.747335	-0.720249	-0.694958	-0.648645	-0.607253	-0.445584	-0.32737	0.563962	0.670928	0.810755	0.845668	0.883955	0.904606	0.926612	0.975258	1.03225	1.10043
8	1400	-3.48838	-2.70665	-2.06121	-1.72744	-1.50762	-1.34427	-1.2157	-1.10852	-1.06132	-1.01767	-0.938461	-0.869221	-0.605782	-0.419288	0.839757	0.995977	1.21309	1.2699	1.33338	1.36839	1.40569	1.49146	1.594	1.72337
9	1578	-1.93668	-1.61818	-1.32777	-1.163	-1.04783	-0.959185	-0.886075	-0.823952	-0.79611	-0.769906	-0.721771	-0.678059	-0.50636	-0.377681	0.606585	0.721448	0.871164	0.908563	0.949509	0.971811	0.995194	1.04744	1.10825	1.18183
10	1756	-2.29657	-1.99479	-1.69921	-1.52702	-1.40209	-1.30403	-1.22269	-1.15271	-1.12125	-1.09195	-1.03713	-0.987504	-0.787545	-0.635786	0.587793	0.733182	0.920936	0.966945	1.01753	1.04457	1.07345	1.13661	1.20972	1.29754
11	1934	-1.94863	-1.68424	-1.43313	-1.28948	-1.18799	-1.10834	-1.04261	-0.986282	-0.96069	-0.936617	-0.892362	-0.852535	-0.692498	-0.571095	0.417954	0.542161	0.705947	0.746992	0.79222	0.816798	0.842991	0.90115	0.969116	1.05141
12	2112	-1.86715	-1.45757	-1.13026	-0.964089	-0.855776	-0.77492	-0.710341	-0.656738	-0.633079	-0.611096	-0.571289	-0.535435	-0.399416	-0.302181	0.406565	0.493438	0.608845	0.637849	0.669916	0.687465	0.706299	0.747612	0.796347	0.856051
13	2290	-2.11115	-1.73406	-1.41015	-1.23529	-1.11476	-1.02267	-0.94799	-0.884883	-0.856398	-0.830119	-0.781329	-0.737766	-0.565842	-0.438582	0.536676	0.651256	0.79941	0.83595	0.875995	0.897614	0.920503	0.970985	1.02911	1.09828
14	2468	-1.89481	-1.54747	-1.24083	-1.07625	-0.963275	-0.877506	-0.807994	-0.749596	-0.723519	-0.699159	-0.655036	-0.615701	-0.460906	-0.347386	0.491671	0.592004	0.722651	0.755123	0.790782	0.810118	0.830404	0.875884	0.928175	0.99122
15	2646	-1.89367	-1.61717	-1.36144	-1.21849	-1.117	-1.03795	-0.973131	-0.918066	-0.893234	-0.869955	-0.827484	-0.789083	-0.63656	-0.521834	0.379591	0.494145	0.648398	0.687747	0.731208	0.754826	0.780319	0.837347	0.904524	0.986915
16	2824	-1.83759	-1.43853	-1.10946	-0.938855	-0.822748	-0.736238	-0.667148	-0.609382	-0.583976	-0.560388	-0.516557	-0.478028	-0.328827	-0.221205	0.569372	0.665884	0.792807	0.824339	0.859478	0.878471	0.898757	0.943762	0.99629	1.05929
17	3002	-2.18386	-1.71726	-1.33855	-1.1458	-1.01761	-0.92241	-0.846328	-0.782838	-0.75477	-0.728656	-0.681081	-0.638523	-0.474857	-0.355996	0.489077	0.589525	0.72022	0.75303	0.788686	0.807926	0.828315	0.873278	0.926002	0.988746
18	3180	-2.10954	-1.84472	-1.57825	-1.4191	-1.30415	-1.2115	-1.13409	-1.0677	-1.03776	-1.00875	-0.955875	-0.907788	-0.712517	-0.562325	0.687322	0.839705	1.03817	1.0872	1.14199	1.17103	1.20181	1.27089	1.35033	1.44574
19	3358	-1.54598	-1.2218	-0.954695	-0.820163	-0.728814	-0.662037	-0.60842	-0.563737	-0.543954	-0.525096	-0.491418	-0.461138	-0.344857	-0.260254	0.360545	0.439781	0.547767	0.575277	0.606212	0.623233	0.641367	0.681675	0.729808	0.78917
20	3536	-1.22314	-0.986529	-0.78026	-0.669516	-0.594984	-0.538418	-0.492495	-0.454469	-0.437433	-0.421652	-0.392927	-0.367261	-0.266878	-0.193747	0.348071	0.411849	0.495085	0.51563	0.538215	0.550428	0.563378	0.592058	0.625209	0.664859
21	3714	-1.10341	-0.906849	-0.735099	-0.643844	-0.581807	-0.53477	-0.496483	-0.464141	-0.449974	-0.436426	-0.41187	-0.389755	-0.304196	-0.241208	0.234407	0.291301	0.36567	0.384097	0.404339	0.415328	0.427019	0.452645	0.482322	0.518475
22	3892	-1.66347	-1.37364	-1.10031	-0.944244	-0.832864	-0.746028	-0.674821	-0.614231	-0.586959	-0.561261	-0.513744	-0.470926	-0.300343	-0.17153	0.842564	0.96117	1.11465	1.15242	1.19374	1.21597	1.23961	1.29153	1.35132	1.42269
23	4070	-2.1811	-1.88326	-1.60393	-1.44231	-1.32655	-1.23684	-1.16241	-1.0989	-1.0701	-1.04304	-0.993222	-0.947658	-0.766324	-0.628641	0.462425	0.592002	0.760055	0.80142	0.847089	0.871685	0.897802	0.955617	1.02237	1.10265
24	4248	-1.89272	-1.62347	-1.36505	-1.21633	-1.10957	-1.02691	-0.958524	-0.899591	-0.873242	-0.848465	-0.802738	-0.761038	-0.594591	-0.467401	0.546007	0.665098	0.819016	0.856884	0.898434	0.920643	0.944422	0.996689	1.05678	1.129
25	4426	-2.01485	-1.67251	-1.36993	-1.20803	-1.09723	-1.01242	-0.944766	-0.887692	-0.861804	-0.837945	-0.794629	-0.755582	-0.603802	-0.492347	0.349668	0.454	0.59345	0.628714	0.667867	0.68922	0.712101	0.762991	0.822609	0.895789
26	4604	-1.93722	-1.68964	-1.44857	-1.30629	-1.20397	-1.1232	-1.05588	-0.998026	-0.971663	-0.947167	-0.901606	-0.860297	-0.692935	-0.563691	0.486869	0.616483	0.788452	0.831591	0.87944	0.905237	0.932712	0.994068	1.06647	1.15373
27	4782	-2.45536	-2.04822	-1.68123	-1.47926	-1.34004	-1.233	-1.14507	-1.07104	-1.03812	-1.00715	-0.950001	-0.898883	-0.697971	-0.548377	0.577596	0.712015	0.887074	0.930821	0.978434	1.00449	1.03211	1.09359	1.16404	1.24993
28	4960	-1.27756	-1.08492	-0.898472	-0.789922	-0.712562	-0.652158	-0.601457	-0.558382	-0.538824	-0.520692	-0.48707	-0.456525	-0.333719	-0.240052	0.50414	0.592139	0.706486	0.734551	0.765647	0.782226	0.799985	0.839212	0.884424	0.938796
29	5138	-2.88392	-2.50503	-2.14161	-1.93061	-1.78002	-1.66215	-1.56512	-1.48197	-1.44463	-1.4091	-1.34317	-1.28378	-1.04547	-0.864366	0.576732	0.749137	0.972057	1.02718	1.08828	1.12135	1.15622	1.23327	1.32329	1.43082
30	5316	-1.46048	-1.26509	-1.07003	-0.954857	-0.871821	-0.805614	-0.750937	-0.704011	-0.682589	-0.662456	-0.625263	-0.591518	-0.454683	-0.349565	0.496933	0.596838	0.72589	0.757798	0.792706	0.811744	0.831537	0.875234	0.926608	0.987719
31	5494	-1.91646	-1.65298	-1.38971	-1.23295	-1.11927	-1.02989	-0.955173	-0.891008	-0.861932	-0.834184	-0.783292	-0.737031	-0.550914	-0.408373	0.751158	0.895103	1.08746	1.13593	1.18935	1.21834	1.24968	1.31881	1.40046	1.49973
32	5672	-1.88124	-1.63998	-1.40317	-1.26303	-1.16208	-1.08228	-1.01612	-0.959062	-0.933285	-0.909115	-0.863693	-0.822707	-0.657661	-0.531123	0.495496	0.619372	0.781759	0.822267	0.866832	0.891211	0.916664	0.9735	1.03952	1.1196
33	5850	-2.70741	-2.3498	-1.99625	-1.78412	-1.63268	-1.51132	-1.4109	-1.32504	-1.28577	-1.24919	-1.18124	-1.1193	-0.868712	-0.676478	0.873186	1.05433	1.28787	1.34537	1.40876	1.44272	1.47857	1.55765	1.64793	1.75679
34	6028	-3.20959	-2.78242	-2.36939	-2.12858	-1.9566	-1.82169	-1.70982	-1.61431	-1.57078	-1.52981	-1.45471	-1.38674	-1.11294	-0.903688	0.766664	0.96292	1.21622	1.27895	1.34744	1.38452	1.42389	1.50961	1.60898	1.72703
35	6206	-4.69722	-4.08332	-3.46886	-3.10807	-2.84822	-2.64267	-2.4717	-2.32441	-2.25713	-2.1944	-2.07813	-1.97248	-1.54508	-1.21846	1.42521	1.74312	2.15476	2.25662	2.36973	2.43171	2.49628	2.63878	2.80485	3.00232
36	6384	-2.81963	-2.43232	-2.05121	-1.82877	-1.66993	-1.54467	-1.44051	-1.35118	-1.31117	-1.27368	-1.20415	-1.14074	-0.88452	-0.689186	0.882335	1.06821	1.3092	1.36912	1.43456	1.46991	1.50714	1.58953	1.68516	1.7999
37	6562	-2.55031	-2.20743	-1.87401	-1.67986	-1.54016	-1.43063	-1.33951	-1.26088	-1.22572	-1.19208	-1.13046	-1.07467	-0.84997	-0.678025	0.700355	0.861623	1.06946	1.12082	1.17669	1.20687	1.23885	1.30889	1.38995	1.48754
38	6740	-2.02315	-1.7602	-1.49575	-1.33978	-1.22699	-1.13706	-1.06125	-0.996274	-0.966769	-0.939118	-0.887434	-0.840273	-0.649757	-0.502563	0.685899	0.824977	1.00512	1.04954	1.09842	1.12473	1.1525	1.21353	1.28419	1.36866
39	6918	-1.81444	-1.60195	-1.38894	-1.26144	-1.1678	-1.09375	-1.03146	-0.977903	-0.95365	-0.930838	-0.888528	-0.849891	-0.693414	-0.572735	0.411881	0.527421	0.675865	0.712008	0.751867	0.773498	0.795921	0.845425	0.902769	0.971388
40	7096	-2.64301	-2.27749	-1.92708	-1.72742	-1.58516	-1.47471	-1.38391	-1.30624	-1.27134	-1.23816	-1.17776	-1.12321	-0.906729	-0.743637	0.534843	0.693131	0.903893	0.957126	1.01626	1.04872	1.08301	1.15917	1.24927	1.35948
41	7274	-2.12251	-1.81012	-1.50464	-1.3279	-1.2007	-1.10085	-1.01883	-0.94834	-0.916254	-0.88634	-0.830969	-0.780481	-0.578543	-0.424074	0.79824	0.941187	1.12556	1.17067	1.22026	1.24715	1.27567	1.3379	1.41004	1.49638
42	7452	-2.64953	-2.2474	-1.88083	-1.67921	-1.53888	-1.4306	-1.34195	-1.2666	-1.23319	-1.20133	-1.14346	-1.09092	-0.885346	-0.73161	0.446141	0.583405	0.760361	0.803758	0.851461	0.877225	0.904252	0.963898	1.03331	1.1159
43	7630	-2.23245	-1.90529	-1.58841	-1.40555	-1.27515	-1.1728	-1.08864	-1.01636	-0.983585	-0.952825	-0.896619	-0.845282	-0.641026	-0.485949	0.738121	0.880525	1.06412	1.10962	1.15906	1.1859	1.21425	1.2764	1.34799	1.43376
44	7808	-3.03168	-2.58757	-2.16744	-1.92928	-1.76139	-1.6318	-1.52492	-1.43429	-1.39351	-1.3552	-1.28526	-1.22192	-0.970902	-0.782623	0.664685	0.833168	1.05075	1.10427	1.16262	1.19407	1.22762	1.30173	1.38666	1.48877
45	7986	-2.49526	-2.11159	-1.75145	-1.54555	-1.3983	-1.28513	-1.19221	-1.11238	-1.07691	-1.04335	-0.981241	-0.924999	-0.702407	-0.535313	0.758255	0.906161	1.09681	1.14326	1.19417	1.2215	1.25031	1.31398	1.38768	1.47566
46	8164	-2.14085	-1.82353	-1.52106	-1.34624	-1.22226	-1.12619	-1.04672	-0.978667	-0.947824	-0.919062	-0.865421	-0.81708	-0.624963	-0.47959	0.655509	0.787708	0.957399	0.999314	1.04533	1.07015	1.0963	1.15388	1.22109	1.30186
47	8342	-2.25292	-1.9129	-1.59547	-1.41242	-1.2849	-1.18519	-1.10383	-1.03448	-1.0033	-0.974269	-0.920768	-0.872331	-0.680305	-0.535725	0.573543	0.704963	0.87828	0.921667	0.969737	0.995779	1.02308	1.08388	1.15472	1.24077
48	8520	-1.70166	-1.4438	-1.19622	-1.0538	-0.95451	-0.877434	-0.813416	-0.75901	-0.734714	-0.711808	-0.669451	-0.631475	-0.480263	-0.366052	0.515125	0.618468	0.752469	0.785914	0.822612	0.84241	0.863497	0.909639	0.963523	1.02884
49	8698	-2.71644	-2.26861	-1.83855	-1.59326	-1.41924	-1.28269	-1.17167	-1.07617	-1.0332	-0.993528	-0.919785	-0.852676	-0.586776	-0.386597	1.16601	1.34994	1.5904	1.65021	1.71619	1.75169	1.78951	1.87228	1.96993	2.08817
50	8876	-1.9015	-1.59051	-1.30157	-1.14108	-1.03007	-0.94447	-0.874983	-0.816342	-0.790115	-0.765366	-0.719705	-0.67899	-0.519465	-0.401054	0.495283	0.608114	0.762538	0.80238	0.847218	0.871631	0.897907	0.956356	1.02618	1.11349
51	9054	-3.14462	-2.6104	-2.13194	-1.87261	-1.69502	-1.55957	-1.45126	-1.35939	-1.31902	-1.28094	-1.21152	-1.14954	-0.90792	-0.730387	0.604323	0.775219	1.00969	1.07018	1.13751	1.17443	1.21501	1.305	1.41154	1.54584
52	9232	-4.26096	-3.30437	-2.52227	-2.12649	-1.869	-1.68118	-1.53404	-1.41372	-1.36134	-1.31277	-1.2244	-1.1461	-0.855255	-0.652516	0.730524	0.89963	1.1291	1.18715	1.25261	1.28813	1.32619	1.41143	1.51268	1.63781
53	9410	-2.8192	-2.27588	-1.80242	-1.55127	-1.38121	-1.25358	-1.15063	-1.06481	-1.02671	-0.991519	-0.927064	-0.869382	-0.648069	-0.487788	0.673399	0.816951	1.01018	1.05917	1.11392	1.14359	1.1753	1.2461	1.33013	1.43396
54	9430	-2.89324	-2.20796	-1.64725	-1.37031	-1.19109	-1.0608	-0.959519	-0.876303	-0.840285	-0.806235	-0.745538	-0.692628	-0.49473	-0.358051	0.567508	0.677969	0.825229	0.86221	0.903493	0.925856	0.949617	1.00267	1.06488	1.14093
55	0	0.005	0.01	0.02	0.03	0.04	0.05	0.06	0.07	0.075	0.08	0.09	0.1	0.15	0.2	0.8	0.85	0.9	0.91	0.92	0.925	0.93	0.94	0.95	0.96
