# Supplementary material for: Time-varying asymmetry and tail thickness in long series of daily financial returns
Source: publisher site journal article supplement (doi:10.1515/snde-2017-0071), 2018-10-02
Supplement: Supplementary file 487 [file pred_quant_H2.xlsx]

## Sheet: 1
	Var1	Var2	Var3	Var4	Var5	Var6	Var7	Var8	Var9	Var10	Var11	Var12	Var13	Var14	Var15	Var16	Var17	Var18	Var19	Var20	Var21	Var22	Var23	Var24	Var25
1	154	-7.43063	-5.38837	-3.87053	-3.1637	-2.72033	-2.40527	-2.16263	-1.96957	-1.88517	-1.8092	-1.67179	-1.55277	-1.11808	-0.824919	1.08855	1.32308	1.63916	1.71962	1.80885	1.85778	1.90996	2.02671	2.16485	2.33559
2	332	-3.21888	-2.3349	-1.69214	-1.39424	-1.20735	-1.07275	-0.968953	-0.885062	-0.847981	-0.814006	-0.75314	-0.699325	-0.500473	-0.363045	0.609039	0.735721	0.907575	0.951216	1.0001	1.02699	1.05548	1.12002	1.19667	1.29185
3	510	-1.77495	-1.40655	-1.10537	-0.951437	-0.846314	-0.767244	-0.704252	-0.65164	-0.628043	-0.605918	-0.565865	-0.529726	-0.390545	-0.28848	0.456015	0.543674	0.658634	0.687594	0.719378	0.736658	0.755065	0.795618	0.84332	0.901022
4	688	-1.60267	-1.24041	-0.956347	-0.813102	-0.719365	-0.649111	-0.593624	-0.547869	-0.527787	-0.509049	-0.475074	-0.444978	-0.330784	-0.249505	0.302102	0.366415	0.451708	0.473183	0.496654	0.509415	0.523069	0.553463	0.589052	0.632427
5	866	-2.73368	-2.15486	-1.67812	-1.43217	-1.26778	-1.14586	-1.04834	-0.967843	-0.932633	-0.89931	-0.839092	-0.785532	-0.581367	-0.435985	0.58956	0.710095	0.868279	0.907966	0.951446	0.975493	1.00062	1.05652	1.12185	1.20046
6	1044	-1.80437	-1.40571	-1.08967	-0.929312	-0.824621	-0.747219	-0.684681	-0.632879	-0.610519	-0.58953	-0.551197	-0.517236	-0.386985	-0.293426	0.38965	0.472031	0.580342	0.607445	0.637066	0.653031	0.67004	0.707947	0.752189	0.804954
7	1222	-2.15437	-1.73925	-1.38508	-1.19644	-1.06874	-0.971867	-0.89359	-0.828553	-0.799208	-0.772234	-0.723139	-0.678934	-0.507896	-0.383244	0.541661	0.652496	0.797453	0.83374	0.873422	0.894869	0.91781	0.968381	1.02751	1.09939
8	1400	-3.54506	-2.73341	-2.0727	-1.74174	-1.52231	-1.35972	-1.23077	-1.1251	-1.07835	-1.03528	-0.957464	-0.888461	-0.627324	-0.444843	0.777719	0.929937	1.14142	1.19688	1.2597	1.29398	1.33116	1.4145	1.51588	1.64257
9	1578	-2.10153	-1.7519	-1.43504	-1.25902	-1.13543	-1.04038	-0.962755	-0.896773	-0.867068	-0.839296	-0.788512	-0.7427	-0.562883	-0.428729	0.585009	0.702778	0.856732	0.895307	0.937596	0.960546	0.985018	1.03908	1.10216	1.17893
10	1756	-2.40285	-2.04308	-1.7063	-1.51158	-1.37467	-1.26867	-1.18086	-1.10626	-1.07246	-1.04077	-0.982888	-0.93043	-0.722927	-0.565901	0.665746	0.811967	1.00283	1.05011	1.10186	1.13012	1.15945	1.22416	1.29952	1.38982
11	1934	-1.96502	-1.66174	-1.38087	-1.22311	-1.11386	-1.02886	-0.959582	-0.90058	-0.873844	-0.848884	-0.803236	-0.761844	-0.597958	-0.474992	0.504524	0.626847	0.789227	0.830251	0.87538	0.900124	0.926182	0.984783	1.05319	1.13585
12	2112	-2.02979	-1.57999	-1.21966	-1.03686	-0.917583	-0.828523	-0.75873	-0.701312	-0.675733	-0.651953	-0.608735	-0.570932	-0.426519	-0.323021	0.418528	0.508874	0.628932	0.659225	0.69289	0.711169	0.730765	0.773919	0.825138	0.887365
13	2290	-2.25334	-1.83573	-1.47403	-1.28218	-1.14999	-1.0507	-0.970677	-0.903578	-0.873452	-0.845629	-0.794407	-0.74875	-0.569985	-0.438345	0.549382	0.665111	0.815172	0.852375	0.893343	0.915567	0.938889	0.990241	1.05035	1.12207
14	2468	-2.08693	-1.69258	-1.34808	-1.16446	-1.04029	-0.946089	-0.870608	-0.806645	-0.7785	-0.752034	-0.704515	-0.661855	-0.497267	-0.377429	0.492134	0.595246	0.730272	0.763687	0.800696	0.820888	0.842286	0.889402	0.944395	1.01062
15	2646	-1.8587	-1.55944	-1.28756	-1.13555	-1.02973	-0.948861	-0.882224	-0.825791	-0.800783	-0.77677	-0.73352	-0.694375	-0.540364	-0.425673	0.457923	0.569383	0.719799	0.75811	0.801019	0.824061	0.848856	0.904404	0.969861	1.05059
16	2824	-2.13254	-1.6784	-1.30811	-1.11775	-0.989722	-0.894654	-0.819135	-0.756282	-0.728209	-0.702466	-0.655578	-0.613975	-0.454063	-0.339028	0.490738	0.591102	0.723454	0.756704	0.79359	0.813815	0.834827	0.881684	0.936806	1.00439
17	3002	-2.32145	-1.80685	-1.39314	-1.18437	-1.04829	-0.946809	-0.866451	-0.799277	-0.769727	-0.742323	-0.692574	-0.64824	-0.478213	-0.356262	0.49759	0.598457	0.730172	0.763082	0.799464	0.819161	0.840097	0.886377	0.940114	1.00458
18	3180	-2.26466	-1.94988	-1.64915	-1.47264	-1.346	-1.24735	-1.16564	-1.09533	-1.06337	-1.03318	-0.978022	-0.928088	-0.7265	-0.572363	0.672207	0.823385	1.02022	1.069	1.12293	1.15227	1.18351	1.25294	1.33392	1.43081
19	3358	-1.67227	-1.31285	-1.02489	-0.876873	-0.778731	-0.705312	-0.646614	-0.597812	-0.576332	-0.556299	-0.519667	-0.487159	-0.362913	-0.273379	0.3739	0.456005	0.567718	0.596226	0.628275	0.645657	0.664378	0.706553	0.75717	0.819072
20	3536	-1.34189	-1.07572	-0.849076	-0.727824	-0.647582	-0.586495	-0.537736	-0.496953	-0.478903	-0.461923	-0.431189	-0.403781	-0.297825	-0.221422	0.334789	0.400061	0.484811	0.505919	0.5291	0.541751	0.555119	0.584526	0.618785	0.659752
21	3714	-1.12426	-0.909909	-0.723237	-0.623956	-0.556785	-0.50593	-0.465301	-0.431339	-0.416176	-0.402012	-0.376246	-0.353227	-0.263699	-0.198163	0.286619	0.34424	0.419661	0.438382	0.458963	0.470136	0.482015	0.508196	0.538753	0.575736
22	3892	-1.95442	-1.63954	-1.34598	-1.18008	-1.06428	-0.97494	-0.901977	-0.8396	-0.81174	-0.785708	-0.73797	-0.694499	-0.523315	-0.394614	0.591843	0.706639	0.85513	0.891519	0.931689	0.953377	0.976266	1.02659	1.08525	1.15517
23	4070	-2.11275	-1.79352	-1.49436	-1.32361	-1.20397	-1.11112	-1.03474	-0.969536	-0.940546	-0.912845	-0.862336	-0.816816	-0.634987	-0.498457	0.559516	0.684517	0.846055	0.885941	0.929676	0.953077	0.978297	1.0336	1.09832	1.1759
24	4248	-1.98324	-1.68192	-1.39775	-1.2372	-1.12372	-1.03632	-0.964515	-0.903351	-0.875465	-0.849521	-0.802086	-0.758954	-0.587734	-0.459265	0.550023	0.668171	0.81942	0.857166	0.898541	0.920633	0.944157	0.995905	1.05523	1.12753
25	4426	-2.0196	-1.64642	-1.32345	-1.14957	-1.03115	-0.941496	-0.869612	-0.808763	-0.781885	-0.756687	-0.710769	-0.66968	-0.51114	-0.39525	0.46045	0.565855	0.706312	0.741846	0.781604	0.802897	0.825819	0.877162	0.93757	1.01141
26	4604	-1.96912	-1.6938	-1.42965	-1.27661	-1.16696	-1.08108	-1.01077	-0.950342	-0.92275	-0.897073	-0.84955	-0.806154	-0.633199	-0.501188	0.55779	0.687921	0.859326	0.90237	0.950089	0.976093	1.00379	1.06557	1.13748	1.22531
27	4782	-2.47225	-2.03637	-1.6532	-1.44427	-1.30144	-1.19175	-1.10257	-1.02695	-0.993417	-0.961725	-0.904101	-0.852883	-0.650843	-0.501777	0.598103	0.727504	0.89726	0.939716	0.986155	1.01136	1.03815	1.09759	1.16653	1.25001
28	4960	-1.42644	-1.21566	-1.01452	-0.897972	-0.814475	-0.750438	-0.697076	-0.651631	-0.63114	-0.611626	-0.576076	-0.543947	-0.41602	-0.31906	0.438984	0.527723	0.643348	0.671879	0.703238	0.720313	0.73827	0.777779	0.823483	0.878288
29	5138	-2.85966	-2.45219	-2.06001	-1.83478	-1.67458	-1.55102	-1.44897	-1.36205	-1.32244	-1.28559	-1.21716	-1.1557	-0.911046	-0.725559	0.725634	0.89659	1.11945	1.17483	1.23541	1.26843	1.30323	1.37988	1.46892	1.57644
30	5316	-1.60747	-1.3838	-1.16572	-1.03929	-0.948272	-0.877102	-0.818354	-0.767458	-0.744853	-0.723251	-0.683526	-0.647173	-0.502141	-0.39148	0.486306	0.589329	0.722537	0.755477	0.791711	0.811211	0.83181	0.877195	0.930064	0.993619
31	5494	-2.14694	-1.85556	-1.5684	-1.39939	-1.27872	-1.18386	-1.10514	-1.03788	-1.0074	-0.978748	-0.925552	-0.87724	-0.684223	-0.536607	0.643985	0.789355	0.982439	1.03138	1.0856	1.11512	1.14666	1.21644	1.29888	1.39941
32	5672	-1.93478	-1.67068	-1.41275	-1.26325	-1.1558	-1.07143	-1.00131	-0.941429	-0.914327	-0.888877	-0.841329	-0.798227	-0.626395	-0.495744	0.547542	0.672558	0.836606	0.877628	0.922861	0.94712	0.972921	1.03028	1.09699	1.17795
33	5850	-2.87505	-2.48554	-2.10263	-1.87784	-1.71747	-1.59026	-1.48626	-1.39688	-1.35643	-1.31784	-1.24758	-1.18339	-0.927609	-0.732254	0.820538	1.00064	1.23369	1.29039	1.3527	1.38616	1.42162	1.49995	1.59076	1.69905
34	6028	-3.27232	-2.80726	-2.36366	-2.10802	-1.92603	-1.78371	-1.66613	-1.56618	-1.52166	-1.47891	-1.4007	-1.32973	-1.04722	-0.832987	0.855573	1.05284	1.30635	1.36893	1.43735	1.47398	1.51313	1.59957	1.69915	1.81777
35	6206	-4.98484	-4.31061	-3.65763	-3.27676	-3.00231	-2.78726	-2.60977	-2.45584	-2.38703	-2.32179	-2.20087	-2.09223	-1.65489	-1.32139	1.32924	1.64375	2.05386	2.15614	2.26754	2.3278	2.39192	2.53255	2.69639	2.89467
36	6384	-3.04038	-2.61746	-2.20908	-1.97167	-1.80139	-1.66835	-1.55859	-1.46445	-1.42176	-1.38159	-1.30779	-1.24069	-0.973058	-0.769626	0.842685	1.03255	1.27778	1.33881	1.40587	1.44219	1.48006	1.5638	1.66131	1.77654
37	6562	-2.6574	-2.28654	-1.92731	-1.72061	-1.57306	-1.45708	-1.36098	-1.27935	-1.24251	-1.20756	-1.14289	-1.08448	-0.850828	-0.673325	0.734383	0.897989	1.10833	1.16007	1.21654	1.24717	1.27929	1.35054	1.43294	1.53177
38	6740	-2.16056	-1.87519	-1.59488	-1.42902	-1.30908	-1.21477	-1.13644	-1.06905	-1.03866	-1.00953	-0.95595	-0.906976	-0.710189	-0.559352	0.647467	0.788026	0.969354	1.01368	1.06255	1.08893	1.11695	1.17856	1.25028	1.33537
39	6918	-1.79643	-1.56744	-1.33817	-1.20241	-1.10458	-1.02713	-0.962893	-0.907566	-0.882165	-0.858331	-0.814525	-0.774235	-0.613122	-0.48824	0.51225	0.628668	0.777914	0.814707	0.854646	0.876286	0.898811	0.949371	1.00713	1.07549
40	7096	-2.61081	-2.22982	-1.8665	-1.6576	-1.51055	-1.39611	-1.30268	-1.22283	-1.18712	-1.15357	-1.09132	-1.03567	-0.814111	-0.647361	0.642946	0.800567	1.01118	1.06438	1.12348	1.15561	1.18987	1.26626	1.35583	1.46769
41	7274	-2.34279	-2.00975	-1.68728	-1.50179	-1.36871	-1.26527	-1.17997	-1.10654	-1.07336	-1.04179	-0.984178	-0.931821	-0.723635	-0.564532	0.680396	0.825294	1.01104	1.0566	1.10675	1.13382	1.16257	1.22543	1.29814	1.38545
42	7452	-2.5818	-2.15964	-1.78047	-1.5703	-1.42368	-1.31128	-1.21996	-1.14197	-1.10714	-1.07421	-1.01462	-0.960393	-0.749817	-0.592456	0.603486	0.742106	0.920086	0.964037	1.01171	1.03751	1.06453	1.12472	1.19427	1.27713
43	7630	-2.40428	-2.05997	-1.72317	-1.53089	-1.39346	-1.28773	-1.19913	-1.12377	-1.08985	-1.05811	-0.999425	-0.946167	-0.734264	-0.573855	0.676498	0.821106	1.00684	1.05215	1.10247	1.12977	1.15847	1.22059	1.29297	1.37936
44	7808	-3.06373	-2.59009	-2.15207	-1.9041	-1.73	-1.59619	-1.48572	-1.39184	-1.34947	-1.30988	-1.23763	-1.1719	-0.913538	-0.720012	0.752338	0.922697	1.14113	1.19507	1.25426	1.28618	1.32019	1.39432	1.48022	1.58371
45	7986	-2.65016	-2.24527	-1.86282	-1.64549	-1.49318	-1.37486	-1.27781	-1.19559	-1.15858	-1.1239	-1.06051	-1.00273	-0.774638	-0.603218	0.705982	0.855065	1.04652	1.09365	1.14497	1.17259	1.2015	1.26488	1.33859	1.42623
46	8164	-2.25778	-1.92669	-1.61018	-1.4274	-1.29922	-1.20007	-1.11721	-1.04695	-1.01467	-0.984816	-0.929997	-0.880261	-0.683114	-0.533578	0.618216	0.75102	0.921707	0.963732	1.00986	1.03446	1.06062	1.11842	1.18605	1.26693
47	8342	-2.31973	-1.95936	-1.6256	-1.43672	-1.30427	-1.20143	-1.11688	-1.04497	-1.01292	-0.982729	-0.927777	-0.877697	-0.680358	-0.532428	0.595587	0.728406	0.903727	0.947426	0.996055	1.02223	1.04983	1.11122	1.18311	1.2702
48	8520	-1.81345	-1.53545	-1.27272	-1.12507	-1.02013	-0.938874	-0.87258	-0.815826	-0.790399	-0.766497	-0.72296	-0.683282	-0.526483	-0.409027	0.493861	0.599394	0.736455	0.770536	0.807731	0.827892	0.849417	0.896146	0.950867	1.01667
49	8698	-3.10591	-2.63372	-2.18394	-1.92887	-1.74875	-1.60893	-1.4937	-1.39604	-1.35169	-1.31025	-1.23411	-1.16533	-0.891816	-0.687027	0.888294	1.07311	1.31424	1.3743	1.44057	1.47673	1.51485	1.59844	1.69703	1.81522
50	8876	-1.99699	-1.66399	-1.3641	-1.19619	-1.07951	-0.990181	-0.918038	-0.85706	-0.829723	-0.804198	-0.757476	-0.715241	-0.550827	-0.428623	0.490746	0.605993	0.763368	0.803788	0.848518	0.872957	0.899839	0.959666	1.03071	1.1184
51	9054	-3.13903	-2.59257	-2.09892	-1.83241	-1.65176	-1.51402	-1.40229	-1.30915	-1.26788	-1.22883	-1.15795	-1.09434	-0.847805	-0.666842	0.691241	0.863677	1.09835	1.159	1.227	1.26426	1.30416	1.39358	1.50046	1.63403
52	9232	-4.35039	-3.35412	-2.5494	-2.14119	-1.87785	-1.68636	-1.53628	-1.41251	-1.35858	-1.30918	-1.21992	-1.1405	-0.844141	-0.63775	0.769062	0.93899	1.1673	1.22577	1.29116	1.32676	1.36472	1.45003	1.55157	1.67606
53	9410	-2.92671	-2.37077	-1.88617	-1.62635	-1.45301	-1.32196	-1.2155	-1.12775	-1.08888	-1.05306	-0.986478	-0.927667	-0.700236	-0.536534	0.651193	0.796759	0.991039	1.04086	1.09648	1.12655	1.15895	1.23105	1.31661	1.42214
54	9430	-3.05381	-2.32347	-1.74043	-1.45146	-1.2656	-1.1308	-1.02507	-0.939494	-0.901862	-0.866536	-0.804039	-0.749087	-0.543719	-0.401807	0.554719	0.667619	0.818059	0.8559	0.897708	0.920565	0.944645	0.998033	1.06133	1.13884
55	0	0.005	0.01	0.02	0.03	0.04	0.05	0.06	0.07	0.075	0.08	0.09	0.1	0.15	0.2	0.8	0.85	0.9	0.91	0.92	0.925	0.93	0.94	0.95	0.96
