# Supplementary material for: Time-varying asymmetry and tail thickness in long series of daily financial returns
Source: publisher site journal article supplement (doi:10.1515/snde-2017-0071), 2018-10-02
Supplement: Supplementary file 489 [file pred_quant_H3.xlsx]

## Sheet: 1
	Var1	Var2	Var3	Var4	Var5	Var6	Var7	Var8	Var9	Var10	Var11	Var12	Var13	Var14	Var15	Var16	Var17	Var18	Var19	Var20	Var21	Var22	Var23	Var24	Var25
1	154	-7.92275	-5.71419	-4.07737	-3.32168	-2.85223	-2.51567	-2.26181	-2.05807	-1.96903	-1.88733	-1.74325	-1.6183	-1.16225	-0.856715	1.12153	1.36692	1.69785	1.78362	1.87853	1.93004	1.98607	2.11033	2.25942	2.44224
2	332	-3.30217	-2.39047	-1.72495	-1.41722	-1.22633	-1.08958	-0.983755	-0.897507	-0.859844	-0.825116	-0.763086	-0.708824	-0.507697	-0.368915	0.609757	0.737909	0.911687	0.956489	1.00659	1.03407	1.06357	1.1295	1.20821	1.30564
3	510	-1.85935	-1.46577	-1.15038	-0.987933	-0.878774	-0.79667	-0.730727	-0.675786	-0.651433	-0.628678	-0.586917	-0.549808	-0.406	-0.301242	0.454935	0.544496	0.662839	0.692828	0.725999	0.743891	0.762857	0.80551	0.855184	0.916124
4	688	-1.64817	-1.2685	-0.970631	-0.823271	-0.726144	-0.65452	-0.597924	-0.551281	-0.530809	-0.511493	-0.476858	-0.446493	-0.330373	-0.248315	0.305424	0.370632	0.457281	0.479106	0.50341	0.516549	0.530586	0.561707	0.598658	0.643574
5	866	-2.84993	-2.23884	-1.73715	-1.47935	-1.31068	-1.18501	-1.08479	-1.00213	-0.96508	-0.931005	-0.869305	-0.814591	-0.605062	-0.455917	0.590371	0.714068	0.87701	0.918139	0.963383	0.98785	1.01409	1.07168	1.13976	1.22218
6	1044	-1.86812	-1.45738	-1.12677	-0.959441	-0.85061	-0.76959	-0.705119	-0.652057	-0.628471	-0.606665	-0.567061	-0.53198	-0.398258	-0.302731	0.393171	0.47773	0.588722	0.616282	0.646992	0.663632	0.681265	0.720364	0.766513	0.822145
7	1222	-2.23388	-1.80048	-1.42826	-1.23242	-1.09974	-0.999529	-0.919056	-0.851944	-0.821977	-0.794108	-0.743275	-0.698193	-0.522744	-0.394812	0.544497	0.657322	0.806596	0.843741	0.884951	0.907327	0.931331	0.983684	1.04474	1.11948
8	1400	-3.49798	-2.69484	-2.04426	-1.71316	-1.49581	-1.33532	-1.2086	-1.10428	-1.05813	-1.01604	-0.939592	-0.872364	-0.618242	-0.440377	0.749276	0.898212	1.10598	1.16081	1.2226	1.25686	1.2935	1.37728	1.47696	1.60359
9	1578	-2.15512	-1.79524	-1.46927	-1.28658	-1.1602	-1.06296	-0.984079	-0.916621	-0.886502	-0.857811	-0.806177	-0.759873	-0.575874	-0.439631	0.586376	0.705866	0.862933	0.902218	0.945481	0.969346	0.994223	1.04925	1.11369	1.1919
10	1756	-2.46077	-2.0842	-1.72436	-1.52323	-1.38117	-1.27071	-1.18025	-1.10342	-1.06892	-1.03665	-0.976968	-0.923314	-0.712033	-0.553472	0.677596	0.825919	1.01884	1.06711	1.11983	1.14866	1.17902	1.24612	1.32438	1.41853
11	1934	-1.98358	-1.65927	-1.36746	-1.20547	-1.09326	-1.00688	-0.936695	-0.877293	-0.850511	-0.825453	-0.779528	-0.737919	-0.574739	-0.452417	0.510465	0.631538	0.793762	0.834772	0.880192	0.904863	0.931296	0.990306	1.05964	1.14479
12	2112	-2.13671	-1.65468	-1.27222	-1.07865	-0.952963	-0.85958	-0.786017	-0.725055	-0.698547	-0.673466	-0.629035	-0.58905	-0.438533	-0.33148	0.429113	0.522222	0.647068	0.678734	0.713921	0.732955	0.753225	0.798645	0.852725	0.91907
13	2290	-2.3289	-1.88184	-1.50006	-1.29949	-1.16425	-1.06281	-0.980505	-0.911708	-0.88089	-0.852118	-0.800059	-0.753585	-0.571901	-0.439145	0.551681	0.668579	0.821183	0.859102	0.900668	0.92341	0.947593	1.00077	1.06327	1.13804
14	2468	-2.19613	-1.76856	-1.40176	-1.20844	-1.07634	-0.97761	-0.897999	-0.831847	-0.802278	-0.775218	-0.725787	-0.681336	-0.511099	-0.387742	0.499427	0.60532	0.745532	0.780059	0.818594	0.839829	0.862178	0.911854	0.970001	1.04062
15	2646	-1.85552	-1.54118	-1.26206	-1.10709	-1.00015	-0.918719	-0.85226	-0.796079	-0.770761	-0.747029	-0.703871	-0.665268	-0.513079	-0.400579	0.45791	0.56762	0.716035	0.753905	0.796597	0.819712	0.844723	0.900057	0.965575	1.04734
16	2824	-2.25837	-1.77723	-1.38296	-1.1787	-1.04431	-0.945046	-0.865337	-0.799572	-0.770491	-0.743549	-0.694642	-0.650878	-0.483567	-0.363843	0.489669	0.593812	0.731883	0.766632	0.805181	0.826261	0.8486	0.898299	0.956501	1.0282
17	3002	-2.39215	-1.84675	-1.41726	-1.20176	-1.0606	-0.955918	-0.873275	-0.804823	-0.774236	-0.745933	-0.695215	-0.650115	-0.478188	-0.35595	0.498612	0.600328	0.734343	0.76804	0.805176	0.825361	0.846694	0.894196	0.949743	1.01701
18	3180	-2.31499	-1.98327	-1.66318	-1.48	-1.34914	-1.24737	-1.16441	-1.0928	-1.06037	-1.02976	-0.973733	-0.923529	-0.721129	-0.567422	0.66225	0.812355	1.01008	1.05942	1.11414	1.1438	1.17535	1.244	1.32485	1.424
19	3358	-1.75673	-1.37725	-1.06934	-0.912566	-0.808225	-0.730524	-0.669112	-0.618092	-0.595606	-0.574491	-0.53667	-0.503057	-0.373876	-0.281478	0.381084	0.465647	0.581066	0.610861	0.644094	0.662522	0.682177	0.726762	0.779489	0.84507
20	3536	-1.3966	-1.11769	-0.878753	-0.752315	-0.667358	-0.603798	-0.553061	-0.510675	-0.491958	-0.474487	-0.442839	-0.414533	-0.305532	-0.227764	0.334819	0.401114	0.488146	0.509853	0.533812	0.546793	0.560565	0.591059	0.626523	0.669791
21	3714	-1.15676	-0.927923	-0.732851	-0.629544	-0.560286	-0.508059	-0.465658	-0.430605	-0.415013	-0.400389	-0.37422	-0.350567	-0.259419	-0.193197	0.295701	0.353963	0.430446	0.449609	0.470767	0.482296	0.494459	0.521318	0.552968	0.591206
22	3892	-1.98596	-1.66074	-1.36001	-1.19222	-1.07523	-0.985702	-0.91298	-0.851142	-0.823682	-0.79768	-0.750466	-0.70767	-0.540064	-0.415113	0.537626	0.649081	0.794017	0.82994	0.869712	0.891325	0.913969	0.963833	1.02239	1.09244
23	4070	-2.08447	-1.75443	-1.44552	-1.27493	-1.15403	-1.06094	-0.984719	-0.920301	-0.891117	-0.863843	-0.81405	-0.769068	-0.591214	-0.458386	0.556079	0.6762	0.833442	0.872612	0.915614	0.938875	0.963841	1.01808	1.08204	1.15962
24	4248	-2.01297	-1.6981	-1.40306	-1.23589	-1.12035	-1.03071	-0.957457	-0.895469	-0.867694	-0.841449	-0.793329	-0.749953	-0.579048	-0.450948	0.542429	0.659012	0.810816	0.848248	0.88917	0.911369	0.934866	0.98699	1.04766	1.12093
25	4426	-2.05591	-1.66518	-1.32778	-1.14776	-1.02533	-0.933675	-0.859194	-0.797541	-0.770196	-0.744699	-0.69822	-0.656462	-0.496293	-0.379408	0.477839	0.583702	0.725903	0.762251	0.802524	0.824424	0.847692	0.900012	0.961607	1.03711
26	4604	-1.99456	-1.70767	-1.43389	-1.27602	-1.16347	-1.07529	-1.00301	-0.941476	-0.913823	-0.887616	-0.839629	-0.795916	-0.621027	-0.488799	0.566826	0.696677	0.869131	0.912713	0.960792	0.987233	1.01561	1.0779	1.15118	1.24126
27	4782	-2.44458	-2.00669	-1.61836	-1.40969	-1.2659	-1.15553	-1.06653	-0.992546	-0.959509	-0.928197	-0.87183	-0.82077	-0.623195	-0.478432	0.583732	0.709664	0.875868	0.917316	0.963136	0.988287	1.01458	1.07316	1.1414	1.22414
28	4960	-1.49085	-1.26247	-1.048	-0.925767	-0.840063	-0.773205	-0.7183	-0.671628	-0.650499	-0.630842	-0.594351	-0.561437	-0.430958	-0.332921	0.428125	0.517869	0.634603	0.663546	0.695345	0.712665	0.730961	0.771726	0.818325	0.874851
29	5138	-2.87719	-2.45297	-2.04946	-1.81889	-1.656	-1.52959	-1.42652	-1.33814	-1.29828	-1.2611	-1.19186	-1.12955	-0.882466	-0.69704	0.742713	0.912714	1.13533	1.19051	1.25126	1.28444	1.31982	1.39773	1.4882	1.59664
30	5316	-1.67606	-1.44001	-1.21077	-1.07751	-0.982493	-0.908869	-0.846987	-0.794056	-0.770341	-0.747797	-0.706322	-0.668734	-0.51858	-0.40524	0.490348	0.595791	0.732781	0.766712	0.803632	0.823623	0.844932	0.892017	0.946816	1.01295
31	5494	-2.21808	-1.9109	-1.61014	-1.43683	-1.31251	-1.21487	-1.13498	-1.06663	-1.03517	-1.00581	-0.951391	-0.902217	-0.705866	-0.557528	0.624649	0.770882	0.965174	1.01429	1.06851	1.09828	1.13011	1.20062	1.28407	1.38569
32	5672	-1.97379	-1.69258	-1.42325	-1.26872	-1.15851	-1.07196	-1.00023	-0.939001	-0.910957	-0.884792	-0.836835	-0.793597	-0.619568	-0.487961	0.556114	0.681436	0.846173	0.887383	0.93259	0.957269	0.98344	1.04149	1.10909	1.19107
33	5850	-2.90985	-2.50343	-2.10995	-1.88176	-1.71861	-1.59209	-1.48626	-1.39581	-1.35495	-1.31647	-1.24592	-1.18188	-0.924703	-0.730765	0.801133	0.979517	1.20908	1.26595	1.32773	1.36117	1.39653	1.4747	1.5657	1.67477
34	6028	-3.31124	-2.82811	-2.3693	-2.10713	-1.92172	-1.77795	-1.65857	-1.55623	-1.51031	-1.46771	-1.38835	-1.3164	-1.03127	-0.81643	0.86609	1.06272	1.31723	1.38048	1.44917	1.48641	1.5261	1.61339	1.71409	1.83453
35	6206	-5.03014	-4.34385	-3.67274	-3.28363	-3.00699	-2.78951	-2.60968	-2.45554	-2.38644	-2.32105	-2.20105	-2.09181	-1.65547	-1.32482	1.29551	1.60745	2.01243	2.11304	2.2246	2.28485	2.34893	2.48967	2.6534	2.85268
36	6384	-3.13581	-2.69276	-2.26674	-2.01811	-1.84445	-1.7079	-1.5945	-1.49814	-1.45427	-1.41364	-1.33786	-1.2688	-0.995204	-0.788803	0.839721	1.03178	1.28017	1.34185	1.40921	1.44588	1.48475	1.57042	1.66902	1.78836
37	6562	-2.70578	-2.32412	-1.95346	-1.7411	-1.58998	-1.47162	-1.3733	-1.28948	-1.25125	-1.21628	-1.15061	-1.09158	-0.854466	-0.673997	0.741259	0.906548	1.11824	1.17053	1.22761	1.25829	1.29115	1.3632	1.44686	1.54718
38	6740	-2.19946	-1.90473	-1.61573	-1.4467	-1.32566	-1.22949	-1.15008	-1.08199	-1.05101	-1.02149	-0.967317	-0.917861	-0.72072	-0.568667	0.637918	0.778535	0.960138	1.00502	1.05435	1.08067	1.109	1.1716	1.24346	1.32954
39	6918	-1.79757	-1.56446	-1.33009	-1.19144	-1.09204	-1.01401	-0.948519	-0.892208	-0.86672	-0.842705	-0.798599	-0.758027	-0.594924	-0.47033	0.528808	0.644545	0.793836	0.830495	0.870235	0.892	0.914936	0.965358	1.02331	1.09278
40	7096	-2.60813	-2.21539	-1.84478	-1.63251	-1.48398	-1.37032	-1.27619	-1.19707	-1.16061	-1.12687	-1.0654	-1.00981	-0.788746	-0.622681	0.655071	0.812021	1.02115	1.07408	1.13297	1.16525	1.19973	1.27539	1.36523	1.47546
41	7274	-2.40948	-2.06463	-1.73401	-1.54242	-1.40568	-1.29945	-1.21171	-1.13682	-1.10265	-1.07087	-1.01258	-0.959632	-0.748377	-0.588662	0.658653	0.803522	0.99088	1.03681	1.08739	1.11466	1.14338	1.20646	1.28012	1.36846
42	7452	-2.586	-2.15287	-1.7635	-1.55075	-1.40237	-1.28914	-1.19642	-1.11813	-1.0828	-1.05028	-0.990045	-0.935709	-0.722135	-0.564286	0.628907	0.766951	0.945073	0.988954	1.03721	1.06303	1.09045	1.15061	1.22071	1.30433
43	7630	-2.45758	-2.09919	-1.75821	-1.56073	-1.42057	-1.31261	-1.22342	-1.14704	-1.1129	-1.08032	-1.02092	-0.966496	-0.752488	-0.590804	0.665663	0.810897	0.998242	1.04415	1.09475	1.12233	1.15135	1.21456	1.28771	1.37607
44	7808	-3.08964	-2.60911	-2.15975	-1.90627	-1.72764	-1.59034	-1.47761	-1.38231	-1.33954	-1.29946	-1.22602	-1.16005	-0.899946	-0.705805	0.765477	0.934949	1.15432	1.20853	1.2679	1.3	1.33376	1.40823	1.49494	1.59893
45	7986	-2.67958	-2.26388	-1.8788	-1.65809	-1.50413	-1.38418	-1.28721	-1.20447	-1.16755	-1.13263	-1.06866	-1.01068	-0.781921	-0.610718	0.692152	0.840717	1.03165	1.07851	1.12982	1.1575	1.18668	1.25066	1.32494	1.41303
46	8164	-2.2908	-1.95481	-1.62793	-1.44211	-1.31206	-1.2106	-1.12706	-1.05618	-1.02435	-0.994255	-0.93872	-0.888513	-0.689476	-0.539799	0.608465	0.740632	0.911472	0.95384	1.00035	1.02567	1.05239	1.11091	1.17886	1.25967
47	8342	-2.34732	-1.98104	-1.6397	-1.44532	-1.31012	-1.20529	-1.11964	-1.04728	-1.01506	-0.984645	-0.928559	-0.878166	-0.678684	-0.529584	0.596334	0.729651	0.905249	0.949404	0.997791	1.02426	1.05231	1.11423	1.18715	1.27538
48	8520	-1.85282	-1.56744	-1.29816	-1.1456	-1.03833	-0.955402	-0.887324	-0.829724	-0.80385	-0.779599	-0.735379	-0.695223	-0.537031	-0.418173	0.49054	0.596571	0.734406	0.768993	0.806707	0.826967	0.848676	0.89677	0.952433	1.01955
49	8698	-3.17961	-2.69934	-2.24789	-1.99027	-1.80681	-1.66536	-1.54971	-1.45037	-1.40562	-1.36404	-1.28748	-1.21841	-0.944157	-0.738698	0.83053	1.01489	1.25501	1.31478	1.38103	1.41708	1.45548	1.53961	1.63782	1.75739
50	8876	-2.02345	-1.68662	-1.381	-1.21091	-1.09323	-1.00331	-0.929798	-0.8677	-0.83982	-0.813866	-0.766615	-0.723922	-0.557065	-0.433759	0.490534	0.606826	0.765033	0.805669	0.851082	0.876252	0.902914	0.963257	1.03479	1.12441
51	9054	-3.14578	-2.58605	-2.09024	-1.82123	-1.63824	-1.49822	-1.38516	-1.29194	-1.2499	-1.21076	-1.13947	-1.07577	-0.828299	-0.647213	0.701056	0.872439	1.10668	1.16718	1.23504	1.27243	1.31259	1.40263	1.51008	1.64433
52	9232	-4.37057	-3.35978	-2.54357	-2.13337	-1.86786	-1.67576	-1.52527	-1.40223	-1.3475	-1.29822	-1.20832	-1.12918	-0.832931	-0.627166	0.767193	0.935539	1.16345	1.22187	1.28695	1.32231	1.36006	1.44514	1.54598	1.67161
53	9410	-2.97326	-2.3994	-1.90381	-1.6431	-1.46714	-1.33499	-1.22838	-1.13973	-1.10041	-1.06358	-0.996276	-0.937284	-0.708652	-0.543759	0.645156	0.790566	0.986786	1.03669	1.09231	1.12323	1.15561	1.22784	1.3138	1.41987
54	9430	-3.13188	-2.38115	-1.7846	-1.48917	-1.29585	-1.15664	-1.0476	-0.958999	-0.920969	-0.885431	-0.821261	-0.765401	-0.555965	-0.4115	0.554297	0.669099	0.821431	0.859889	0.902395	0.925631	0.950157	1.0051	1.06978	1.14848
55	0	0.005	0.01	0.02	0.03	0.04	0.05	0.06	0.07	0.075	0.08	0.09	0.1	0.15	0.2	0.8	0.85	0.9	0.91	0.92	0.925	0.93	0.94	0.95	0.96
