# Supplementary material for: Time-varying asymmetry and tail thickness in long series of daily financial returns
Source: publisher site journal article supplement (doi:10.1515/snde-2017-0071), 2018-10-02
Supplement: Supplementary file 491 [file pred_quant_H4.xlsx]

## Sheet: 1
	Var1	Var2	Var3	Var4	Var5	Var6	Var7	Var8	Var9	Var10	Var11	Var12	Var13	Var14	Var15	Var16	Var17	Var18	Var19	Var20	Var21	Var22	Var23	Var24	Var25
1	154	-8.26355	-5.95459	-4.242	-3.44513	-2.95095	-2.60224	-2.33623	-2.12341	-2.03245	-1.94785	-1.79754	-1.66678	-1.19406	-0.878494	1.14592	1.39895	1.74265	1.8305	1.92966	1.98382	2.04126	2.17096	2.32525	2.51753
2	332	-3.30374	-2.39548	-1.73506	-1.42694	-1.23303	-1.09468	-0.988487	-0.902764	-0.865446	-0.830614	-0.767925	-0.713509	-0.510403	-0.370605	0.611831	0.74114	0.916717	0.961658	1.01264	1.04009	1.06969	1.13669	1.21649	1.31668
3	510	-1.9274	-1.51455	-1.18098	-1.01012	-0.897168	-0.812676	-0.744971	-0.688507	-0.663291	-0.63967	-0.597399	-0.559428	-0.412458	-0.306051	0.459774	0.551373	0.672582	0.703047	0.737007	0.755598	0.775528	0.819699	0.8718	0.935185
4	688	-1.67261	-1.28299	-0.981648	-0.829113	-0.730341	-0.657779	-0.600464	-0.553436	-0.532529	-0.513213	-0.478341	-0.447311	-0.330588	-0.248292	0.307244	0.373123	0.46089	0.483118	0.50782	0.521133	0.535432	0.56726	0.604915	0.650952
5	866	-2.91295	-2.28438	-1.77023	-1.50742	-1.3324	-1.20323	-1.10275	-1.0184	-0.981233	-0.946422	-0.883318	-0.827934	-0.61521	-0.463438	0.597951	0.723312	0.889932	0.93178	0.978007	1.00299	1.0296	1.08877	1.15818	1.2426
6	1044	-1.92862	-1.49195	-1.14851	-0.978083	-0.865505	-0.782479	-0.717152	-0.662891	-0.63883	-0.616423	-0.575911	-0.540197	-0.404251	-0.30708	0.398469	0.484279	0.597593	0.625814	0.657127	0.674244	0.692167	0.732376	0.779558	0.83657
7	1222	-2.29053	-1.84187	-1.45541	-1.25494	-1.11906	-1.01649	-0.934829	-0.86622	-0.83572	-0.80713	-0.755244	-0.709459	-0.530523	-0.400843	0.550533	0.665588	0.817261	0.855368	0.897419	0.920154	0.944672	0.999118	1.06215	1.13901
8	1400	-3.49137	-2.67822	-2.01914	-1.69126	-1.47495	-1.31612	-1.19095	-1.08861	-1.04365	-1.00141	-0.925635	-0.859249	-0.609285	-0.434229	0.732101	0.879264	1.08605	1.14065	1.20158	1.23519	1.27156	1.35447	1.45501	1.5817
9	1578	-2.18527	-1.8174	-1.48329	-1.29854	-1.17044	-1.07206	-0.991957	-0.924413	-0.893919	-0.865492	-0.813255	-0.76626	-0.580481	-0.443203	0.590605	0.711965	0.870816	0.910466	0.954302	0.978276	1.00357	1.0598	1.12578	1.20569
10	1756	-2.51192	-2.11426	-1.74175	-1.53514	-1.38935	-1.27665	-1.18456	-1.1063	-1.07119	-1.03883	-0.978674	-0.924804	-0.711866	-0.552527	0.680463	0.830231	1.02657	1.07553	1.12964	1.15893	1.19	1.25858	1.33866	1.43509
11	1934	-1.9956	-1.66407	-1.36679	-1.20117	-1.08734	-1.00014	-0.928889	-0.869267	-0.842511	-0.817006	-0.771038	-0.729633	-0.56679	-0.44591	0.505217	0.626239	0.788576	0.829812	0.875563	0.900556	0.927401	0.986902	1.05745	1.14359
12	2112	-2.21732	-1.71265	-1.31288	-1.11229	-0.980042	-0.883606	-0.807549	-0.744824	-0.717234	-0.691735	-0.645436	-0.604369	-0.44835	-0.338331	0.439143	0.535165	0.664291	0.697103	0.733659	0.753528	0.774862	0.822241	0.878501	0.947651
13	2290	-2.36865	-1.90701	-1.52036	-1.31525	-1.17593	-1.07177	-0.98764	-0.917549	-0.88644	-0.857552	-0.804871	-0.757002	-0.573655	-0.439526	0.553526	0.671939	0.827234	0.86588	0.908598	0.931854	0.956554	1.01106	1.07477	1.15253
14	2468	-2.27067	-1.82462	-1.44017	-1.23787	-1.10173	-0.99897	-0.917285	-0.849329	-0.819055	-0.791196	-0.740009	-0.69437	-0.519356	-0.392762	0.507957	0.616796	0.760857	0.797249	0.837456	0.859031	0.882191	0.933437	0.99382	1.06789
15	2646	-1.84939	-1.52906	-1.24404	-1.08842	-0.981363	-0.899776	-0.833976	-0.778264	-0.753243	-0.729812	-0.687088	-0.648806	-0.499431	-0.38937	0.448888	0.556594	0.702888	0.74078	0.783041	0.806293	0.831024	0.886813	0.952989	1.03482
16	2824	-2.35205	-1.84122	-1.42787	-1.2178	-1.07862	-0.97472	-0.892016	-0.823669	-0.793557	-0.765872	-0.714997	-0.66986	-0.498257	-0.375167	0.498989	0.606112	0.7494	0.785392	0.825536	0.847473	0.870689	0.922724	0.984222	1.05988
17	3002	-2.45005	-1.88885	-1.43971	-1.21493	-1.07091	-0.963877	-0.879534	-0.809749	-0.778877	-0.750413	-0.698808	-0.653215	-0.480273	-0.357145	0.500426	0.603041	0.738632	0.772891	0.810754	0.831401	0.853345	0.902406	0.959965	1.02979
18	3180	-2.35714	-2.00496	-1.67289	-1.48444	-1.35143	-1.24787	-1.16287	-1.0903	-1.05747	-1.02657	-0.970136	-0.919254	-0.716752	-0.563816	0.655928	0.805797	1.00415	1.05394	1.10953	1.1397	1.17112	1.24198	1.3256	1.42681
19	3358	-1.82583	-1.42495	-1.10452	-0.939701	-0.831521	-0.751148	-0.686872	-0.634049	-0.610607	-0.589014	-0.549763	-0.51512	-0.382272	-0.287316	0.388501	0.47495	0.593893	0.624602	0.659083	0.678195	0.698581	0.744263	0.798947	0.867032
20	3536	-1.44162	-1.14958	-0.899511	-0.767958	-0.68016	-0.614655	-0.562933	-0.519681	-0.500685	-0.482823	-0.450445	-0.421809	-0.3112	-0.231688	0.338394	0.405885	0.495006	0.51727	0.541876	0.555177	0.569259	0.600788	0.637919	0.682521
21	3714	-1.19011	-0.950938	-0.747553	-0.640206	-0.568657	-0.514806	-0.471681	-0.435941	-0.420069	-0.405207	-0.378034	-0.35392	-0.261224	-0.193959	0.298373	0.357591	0.435766	0.455368	0.476878	0.488729	0.501202	0.529101	0.561758	0.600977
22	3892	-1.97477	-1.63934	-1.33684	-1.16968	-1.05373	-0.964807	-0.892887	-0.831864	-0.805066	-0.77985	-0.733343	-0.691488	-0.527226	-0.405793	0.515868	0.625099	0.767786	0.803467	0.842661	0.86394	0.88641	0.936035	0.994045	1.06484
23	4070	-2.04954	-1.71563	-1.40795	-1.23595	-1.116	-1.02474	-0.949753	-0.886312	-0.857761	-0.831303	-0.782525	-0.738691	-0.565127	-0.43684	0.539813	0.655809	0.808652	0.847104	0.8893	0.91235	0.936754	0.990751	1.05394	1.13043
24	4248	-2.03377	-1.70706	-1.40189	-1.23204	-1.11417	-1.02322	-0.949795	-0.887025	-0.859141	-0.833057	-0.784562	-0.741208	-0.570581	-0.443485	0.535587	0.651508	0.802765	0.840285	0.881936	0.904295	0.928325	0.980574	1.04189	1.11569
25	4426	-2.09719	-1.69564	-1.34463	-1.16014	-1.03544	-0.940307	-0.864547	-0.802058	-0.774214	-0.748488	-0.700625	-0.658498	-0.495879	-0.378437	0.481767	0.588764	0.732847	0.769475	0.810368	0.832772	0.856446	0.909833	0.973201	1.05148
26	4604	-2.01935	-1.72471	-1.44388	-1.28128	-1.16696	-1.07702	-1.00383	-0.941079	-0.912894	-0.886297	-0.837542	-0.793505	-0.617926	-0.485297	0.565973	0.695612	0.869277	0.913161	0.962174	0.988309	1.0169	1.07927	1.15416	1.24545
27	4782	-2.41801	-1.97191	-1.58322	-1.37411	-1.23115	-1.12257	-1.03468	-0.961525	-0.92856	-0.898121	-0.842255	-0.792476	-0.599653	-0.458821	0.566112	0.687919	0.849735	0.890252	0.935271	0.959841	0.986073	1.04459	1.11289	1.19592
28	4960	-1.52196	-1.2876	-1.06562	-0.939892	-0.851397	-0.78314	-0.726978	-0.679267	-0.657796	-0.637745	-0.60094	-0.567671	-0.435685	-0.33692	0.428754	0.519435	0.637715	0.667083	0.699582	0.717055	0.735586	0.776748	0.824752	0.882907
29	5138	-2.90299	-2.46425	-2.04971	-1.81548	-1.65047	-1.52245	-1.41763	-1.3282	-1.2882	-1.2503	-1.18179	-1.11924	-0.871744	-0.687023	0.74228	0.912428	1.13527	1.19123	1.25268	1.28631	1.32183	1.40041	1.49157	1.60176
30	5316	-1.7396	-1.48776	-1.24697	-1.10688	-1.00826	-0.931487	-0.867611	-0.813171	-0.788619	-0.76552	-0.723226	-0.684658	-0.53106	-0.414643	0.497622	0.605297	0.745771	0.780513	0.818589	0.839236	0.861244	0.909678	0.965935	1.03348
31	5494	-2.25765	-1.93996	-1.63082	-1.4529	-1.32668	-1.22738	-1.14517	-1.07535	-1.04361	-1.01367	-0.958927	-0.909524	-0.711815	-0.562462	0.622477	0.769582	0.96556	1.01487	1.07048	1.10075	1.13314	1.20509	1.28996	1.39391
32	5672	-2.00225	-1.71316	-1.43727	-1.2784	-1.16567	-1.07752	-1.00534	-0.943099	-0.915055	-0.888488	-0.839789	-0.795718	-0.620531	-0.488267	0.558538	0.684655	0.851088	0.892889	0.938816	0.963593	0.989871	1.04914	1.11801	1.20139
33	5850	-2.92597	-2.50593	-2.10374	-1.87129	-1.70835	-1.58064	-1.47527	-1.38463	-1.34375	-1.30502	-1.23439	-1.17044	-0.915009	-0.722121	0.790798	0.967854	1.19757	1.25364	1.31531	1.34924	1.38497	1.46369	1.55514	1.66425
34	6028	-3.3481	-2.84829	-2.38061	-2.11112	-1.92213	-1.77491	-1.65434	-1.55188	-1.50568	-1.46284	-1.38349	-1.31169	-1.02563	-0.810109	0.864866	1.06189	1.31767	1.38092	1.45013	1.48792	1.52767	1.61582	1.71742	1.84005
35	6206	-5.05402	-4.33947	-3.65813	-3.26637	-2.9856	-2.76869	-2.58944	-2.43554	-2.36613	-2.30074	-2.1807	-2.07157	-1.6366	-1.3073	1.27774	1.58685	1.99113	2.09177	2.2022	2.26244	2.32632	2.46699	2.63159	2.82935
36	6384	-3.20792	-2.74584	-2.30727	-2.05353	-1.8733	-1.73197	-1.61608	-1.5174	-1.47318	-1.43205	-1.3549	-1.28567	-1.0085	-0.798884	0.844288	1.0384	1.29101	1.35397	1.42302	1.46027	1.49987	1.58698	1.68767	1.80885
37	6562	-2.75537	-2.35576	-1.97663	-1.75571	-1.60171	-1.48141	-1.38288	-1.2977	-1.25957	-1.22346	-1.15754	-1.09755	-0.85878	-0.677044	0.744267	0.910508	1.12538	1.17849	1.23619	1.26734	1.30037	1.3735	1.45862	1.5597
38	6740	-2.22442	-1.92248	-1.62846	-1.45674	-1.33274	-1.23542	-1.15474	-1.08595	-1.05472	-1.02475	-0.970344	-0.92093	-0.721803	-0.569739	0.636286	0.776972	0.95925	1.00418	1.0538	1.08027	1.10863	1.17088	1.24338	1.33065
39	6918	-1.81963	-1.57512	-1.33557	-1.1943	-1.0931	-1.01399	-0.947745	-0.890971	-0.865179	-0.840846	-0.796164	-0.755418	-0.591758	-0.466751	0.53115	0.647289	0.797292	0.834303	0.874688	0.89659	0.919572	0.970228	1.02871	1.09855
40	7096	-2.60665	-2.21007	-1.83405	-1.62209	-1.47314	-1.35776	-1.264	-1.18392	-1.14778	-1.11413	-1.05212	-0.99631	-0.776676	-0.612386	0.651968	0.807637	1.01639	1.06909	1.12826	1.16002	1.19425	1.27041	1.3598	1.47005
41	7274	-2.43964	-2.08947	-1.74884	-1.55394	-1.41659	-1.30983	-1.22076	-1.14538	-1.11138	-1.07923	-1.01997	-0.966402	-0.754772	-0.594299	0.654033	0.799308	0.987509	1.03384	1.08473	1.11234	1.14181	1.20558	1.28033	1.37015
42	7452	-2.60995	-2.16481	-1.76734	-1.5499	-1.4001	-1.28523	-1.19241	-1.1132	-1.07807	-1.04524	-0.984364	-0.92988	-0.716068	-0.557647	0.631744	0.769551	0.947837	0.99191	1.04035	1.06633	1.09407	1.15484	1.22527	1.3096
43	7630	-2.49798	-2.12931	-1.77808	-1.57659	-1.43432	-1.32385	-1.23311	-1.15579	-1.1213	-1.08849	-1.02801	-0.973493	-0.75813	-0.595659	0.664877	0.810498	0.999448	1.04631	1.09768	1.1254	1.15457	1.2187	1.29247	1.38209
44	7808	-3.10948	-2.61474	-2.15944	-1.90367	-1.72481	-1.58721	-1.47482	-1.37987	-1.33714	-1.29698	-1.22352	-1.15714	-0.895798	-0.701744	0.767603	0.937356	1.15726	1.21166	1.27136	1.30383	1.33813	1.41341	1.5002	1.60578
45	7986	-2.69782	-2.27726	-1.88265	-1.66087	-1.50593	-1.38547	-1.28704	-1.20327	-1.16587	-1.13108	-1.06655	-1.00867	-0.779773	-0.608358	0.687206	0.835613	1.02607	1.07264	1.12374	1.15157	1.18064	1.24523	1.31974	1.40797
46	8164	-2.31577	-1.96633	-1.63638	-1.44837	-1.31597	-1.21369	-1.1287	-1.05708	-1.0248	-0.994457	-0.938245	-0.887585	-0.688691	-0.539114	0.606695	0.738637	0.910073	0.95273	0.999824	1.02522	1.05204	1.11099	1.17909	1.26086
47	8342	-2.36908	-1.9945	-1.64605	-1.44954	-1.31263	-1.20664	-1.12076	-1.04733	-1.01455	-0.983643	-0.926822	-0.875779	-0.675458	-0.526877	0.595723	0.730029	0.906694	0.951156	1.00015	1.02665	1.05457	1.1169	1.19016	1.27937
48	8520	-1.88259	-1.59133	-1.31531	-1.15957	-1.04989	-0.965463	-0.89649	-0.837754	-0.811534	-0.786924	-0.741716	-0.701047	-0.540473	-0.420551	0.492362	0.59985	0.739075	0.773859	0.812236	0.833161	0.855112	0.903131	0.959683	1.02814
49	8698	-3.20522	-2.71918	-2.26078	-1.99822	-1.81426	-1.67219	-1.55517	-1.45657	-1.41222	-1.3705	-1.29414	-1.22471	-0.950513	-0.745037	0.818119	1.00285	1.24487	1.30556	1.37232	1.40847	1.44675	1.53144	1.63027	1.74932
50	8876	-2.05046	-1.7074	-1.39543	-1.22147	-1.10204	-1.0106	-0.936265	-0.873958	-0.846012	-0.819793	-0.771746	-0.72841	-0.559723	-0.435983	0.49164	0.608231	0.767885	0.808912	0.854734	0.880007	0.907156	0.967727	1.03986	1.12996
51	9054	-3.15496	-2.58816	-2.0857	-1.8147	-1.63028	-1.49129	-1.37859	-1.28522	-1.24301	-1.20409	-1.13284	-1.06884	-0.821245	-0.6416	0.699445	0.869525	1.10346	1.1639	1.23133	1.26869	1.30841	1.39844	1.50651	1.64023
52	9232	-4.38846	-3.36364	-2.54731	-2.13444	-1.86839	-1.67539	-1.52279	-1.39921	-1.34453	-1.29454	-1.20456	-1.12541	-0.828391	-0.622823	0.761008	0.929132	1.15618	1.21494	1.2797	1.31541	1.35342	1.43801	1.54026	1.66622
53	9410	-2.98988	-2.41766	-1.91889	-1.6525	-1.47403	-1.34033	-1.23361	-1.14443	-1.10434	-1.06739	-1.00012	-0.940435	-0.710773	-0.545024	0.644547	0.790537	0.987713	1.03842	1.09437	1.12506	1.15775	1.23128	1.3181	1.42528
54	9430	-3.19088	-2.41787	-1.80712	-1.50578	-1.31233	-1.17071	-1.06091	-0.971448	-0.932126	-0.895837	-0.831039	-0.773934	-0.561665	-0.415893	0.558042	0.673796	0.828429	0.867541	0.911197	0.934945	0.960232	1.01594	1.08248	1.16359
55	0	0.005	0.01	0.02	0.03	0.04	0.05	0.06	0.07	0.075	0.08	0.09	0.1	0.15	0.2	0.8	0.85	0.9	0.91	0.92	0.925	0.93	0.94	0.95	0.96
