# Supplementary material for: Time-varying asymmetry and tail thickness in long series of daily financial returns
Source: publisher site journal article supplement (doi:10.1515/snde-2017-0071), 2018-10-02
Supplement: Supplementary file 493 [file pred_quant_H5.xlsx]

## Sheet: 1
	Var1	Var2	Var3	Var4	Var5	Var6	Var7	Var8	Var9	Var10	Var11	Var12	Var13	Var14	Var15	Var16	Var17	Var18	Var19	Var20	Var21	Var22	Var23	Var24	Var25
1	154	-8.58196	-6.16407	-4.37391	-3.54613	-3.0362	-2.67507	-2.39933	-2.17854	-2.08307	-1.99648	-1.84173	-1.70602	-1.22136	-0.89832	1.16635	1.42486	1.78153	1.8732	1.97563	2.03229	2.09284	2.22924	2.39038	2.59113
2	332	-3.3591	-2.42711	-1.75144	-1.43909	-1.24271	-1.10238	-0.994614	-0.907099	-0.869005	-0.833953	-0.770975	-0.71605	-0.511539	-0.370943	0.613782	0.743218	0.919963	0.965647	1.01699	1.04487	1.07531	1.14263	1.22398	1.32495
3	510	-1.9792	-1.555	-1.20874	-1.03222	-0.915338	-0.827861	-0.758575	-0.700596	-0.674952	-0.650882	-0.60733	-0.568581	-0.418775	-0.309641	0.464293	0.557418	0.682007	0.713555	0.748634	0.767681	0.788097	0.833357	0.886845	0.952627
4	688	-1.69448	-1.29647	-0.988371	-0.835725	-0.735836	-0.662002	-0.603584	-0.555984	-0.534909	-0.515358	-0.480051	-0.44889	-0.331206	-0.248323	0.308107	0.374542	0.463475	0.485968	0.511061	0.52467	0.539177	0.571818	0.61034	0.65803
5	866	-2.96144	-2.31965	-1.79486	-1.52984	-1.35306	-1.22199	-1.11762	-1.03149	-0.99313	-0.957924	-0.894075	-0.837492	-0.621891	-0.46832	0.603347	0.73073	0.899361	0.94166	0.988755	1.01426	1.0412	1.10163	1.17236	1.25893
6	1044	-1.96235	-1.51546	-1.16665	-0.992501	-0.877836	-0.792865	-0.725938	-0.670598	-0.646517	-0.62411	-0.583034	-0.546833	-0.408849	-0.310418	0.402587	0.489524	0.604466	0.63327	0.665075	0.682133	0.700519	0.741568	0.78926	0.847638
7	1222	-2.32379	-1.86632	-1.47597	-1.27209	-1.13433	-1.02893	-0.945518	-0.875287	-0.84428	-0.815699	-0.763081	-0.716315	-0.536212	-0.404469	0.556772	0.67324	0.827674	0.866571	0.909469	0.932826	0.957761	1.01261	1.07669	1.15485
8	1400	-3.45585	-2.65382	-1.99914	-1.67237	-1.45963	-1.30189	-1.17816	-1.07654	-1.03181	-0.990404	-0.915751	-0.849586	-0.602107	-0.429701	0.721787	0.868031	1.07295	1.12692	1.18794	1.22162	1.2579	1.34037	1.43893	1.56578
9	1578	-2.20644	-1.82982	-1.4927	-1.30611	-1.1768	-1.0782	-0.996386	-0.927954	-0.897125	-0.867968	-0.815416	-0.768186	-0.582213	-0.444424	0.592481	0.714166	0.873802	0.913598	0.957701	0.98191	1.00733	1.06404	1.13054	1.2117
10	1756	-2.54654	-2.14016	-1.7635	-1.54873	-1.40079	-1.2858	-1.192	-1.11246	-1.07699	-1.04424	-0.983319	-0.928377	-0.713158	-0.553508	0.6825	0.832999	1.03148	1.08075	1.13489	1.16435	1.19604	1.26587	1.3468	1.44577
11	1934	-2.01028	-1.67111	-1.36784	-1.19867	-1.08428	-0.995883	-0.924191	-0.864231	-0.837006	-0.811457	-0.765514	-0.723855	-0.560645	-0.440534	0.500115	0.620926	0.783871	0.825155	0.871112	0.896379	0.923393	0.983577	1.0546	1.14182
12	2112	-2.28318	-1.76187	-1.34453	-1.13781	-1.00251	-0.902478	-0.823882	-0.759397	-0.731208	-0.704886	-0.657741	-0.615559	-0.456607	-0.344315	0.447216	0.545204	0.677379	0.711007	0.748571	0.769147	0.791444	0.840763	0.899244	0.971615
13	2290	-2.41205	-1.93582	-1.53571	-1.32463	-1.18411	-1.07937	-0.99435	-0.923465	-0.892309	-0.862883	-0.809451	-0.76168	-0.57606	-0.441133	0.55638	0.675718	0.832783	0.871959	0.915456	0.938941	0.964083	1.02033	1.08622	1.1667
14	2468	-2.34582	-1.86957	-1.47201	-1.26227	-1.12128	-1.01668	-0.932998	-0.863113	-0.832281	-0.803265	-0.751121	-0.704843	-0.526367	-0.397981	0.514751	0.625369	0.773108	0.81046	0.851573	0.874044	0.898003	0.951682	1.01445	1.09166
15	2646	-1.83564	-1.51622	-1.23041	-1.07571	-0.968853	-0.886885	-0.821135	-0.765797	-0.740911	-0.717501	-0.675139	-0.637395	-0.489757	-0.381318	0.43923	0.545665	0.691275	0.728525	0.770439	0.793136	0.817641	0.872774	0.938745	1.01978
16	2824	-2.42756	-1.89947	-1.46817	-1.24898	-1.10351	-0.996273	-0.911468	-0.840989	-0.809933	-0.780759	-0.728653	-0.68264	-0.507169	-0.382117	0.508759	0.618576	0.765931	0.803219	0.844899	0.867617	0.89159	0.945306	1.00907	1.08692
17	3002	-2.4808	-1.90486	-1.45165	-1.22602	-1.07897	-0.970246	-0.885005	-0.814572	-0.78352	-0.754566	-0.702784	-0.656798	-0.48208	-0.357714	0.501698	0.605271	0.74278	0.77762	0.81624	0.837401	0.85981	0.909265	0.968016	1.04009
18	3180	-2.37527	-2.01814	-1.67712	-1.48574	-1.35072	-1.24615	-1.16062	-1.08759	-1.05482	-1.02385	-0.967263	-0.915815	-0.71238	-0.559468	0.651966	0.801812	1.00126	1.05155	1.1072	1.13745	1.16956	1.24121	1.32544	1.42763
19	3358	-1.89012	-1.47085	-1.1318	-0.962396	-0.850692	-0.7675	-0.701433	-0.647145	-0.623104	-0.600842	-0.560893	-0.52517	-0.389172	-0.292	0.393956	0.482486	0.604547	0.636163	0.6715	0.691121	0.71191	0.758741	0.815067	0.885684
20	3536	-1.48142	-1.1787	-0.919158	-0.784047	-0.694121	-0.627441	-0.573583	-0.528986	-0.509244	-0.490981	-0.457722	-0.428305	-0.315599	-0.234996	0.3417	0.410583	0.501355	0.524278	0.549561	0.563259	0.577679	0.61014	0.648587	0.694751
21	3714	-1.22474	-0.972562	-0.761022	-0.650354	-0.576854	-0.5216	-0.477394	-0.440952	-0.424724	-0.409603	-0.3819	-0.357472	-0.263167	-0.195122	0.301027	0.360868	0.440183	0.460163	0.482191	0.494198	0.506991	0.535196	0.568542	0.608971
22	3892	-1.96658	-1.62629	-1.31844	-1.14934	-1.03382	-0.945409	-0.873352	-0.812929	-0.786143	-0.760959	-0.715061	-0.673834	-0.51265	-0.39384	0.500473	0.606564	0.746926	0.781854	0.820443	0.841339	0.863725	0.913211	0.971354	1.04228
23	4070	-2.02466	-1.68677	-1.37596	-1.20432	-1.08482	-0.993447	-0.919299	-0.856755	-0.828822	-0.802396	-0.754806	-0.712034	-0.543746	-0.419666	0.521508	0.634598	0.783686	0.821542	0.863185	0.885728	0.909799	0.963431	1.0258	1.10308
24	4248	-2.0562	-1.71431	-1.40187	-1.22967	-1.10984	-1.01763	-0.943147	-0.880597	-0.852595	-0.82631	-0.778054	-0.734682	-0.564331	-0.437808	0.528174	0.64303	0.793746	0.83121	0.8726	0.895022	0.919014	0.971733	1.03351	1.10873
25	4426	-2.13182	-1.7161	-1.3591	-1.17051	-1.04324	-0.947134	-0.870258	-0.806303	-0.77798	-0.751383	-0.703294	-0.660581	-0.49679	-0.378551	0.483624	0.591157	0.736895	0.773916	0.815837	0.838598	0.862824	0.916746	0.981234	1.06104
26	4604	-2.05003	-1.74069	-1.45089	-1.28671	-1.17069	-1.08053	-1.00596	-0.942668	-0.914308	-0.887836	-0.838619	-0.794177	-0.617717	-0.484304	0.563927	0.693705	0.868402	0.912709	0.962043	0.988928	1.01753	1.08182	1.15725	1.24991
27	4782	-2.38939	-1.94325	-1.55235	-1.344	-1.20093	-1.09346	-1.00686	-0.934404	-0.901811	-0.871786	-0.817263	-0.768424	-0.578648	-0.441522	0.547746	0.666788	0.825527	0.865718	0.910485	0.934625	0.9605	1.01782	1.08609	1.16933
28	4960	-1.54929	-1.30674	-1.07874	-0.950379	-0.860125	-0.790459	-0.733596	-0.684977	-0.663186	-0.642797	-0.605577	-0.571839	-0.438351	-0.338353	0.430293	0.52148	0.640908	0.670917	0.703899	0.72193	0.740884	0.782926	0.831964	0.891447
29	5138	-2.93882	-2.47936	-2.05627	-1.81699	-1.64931	-1.5201	-1.4138	-1.32423	-1.28369	-1.24597	-1.17633	-1.11376	-0.866332	-0.681573	0.737366	0.907154	1.13082	1.18688	1.24838	1.28174	1.31735	1.39586	1.48828	1.5999
30	5316	-1.7916	-1.52747	-1.27849	-1.13396	-1.03155	-0.952298	-0.887184	-0.831591	-0.806483	-0.78266	-0.738914	-0.699314	-0.541847	-0.423139	0.504996	0.615254	0.7585	0.794512	0.83406	0.855503	0.878371	0.927967	0.98613	1.05629
31	5494	-2.2931	-1.96343	-1.64776	-1.46516	-1.33634	-1.23538	-1.15299	-1.08151	-1.04947	-1.01944	-0.964205	-0.914301	-0.715197	-0.564797	0.622522	0.769736	0.967524	1.01717	1.07349	1.10367	1.13586	1.20842	1.29374	1.39863
32	5672	-2.03479	-1.73903	-1.45097	-1.28868	-1.17249	-1.08269	-1.00904	-0.946182	-0.917935	-0.891124	-0.84184	-0.797815	-0.621184	-0.488067	0.559824	0.68688	0.854046	0.895982	0.942627	0.967901	0.994861	1.05476	1.12438	1.20971
33	5850	-2.93119	-2.50554	-2.09731	-1.86317	-1.69714	-1.56738	-1.46179	-1.37125	-1.33038	-1.29215	-1.22204	-1.15882	-0.90508	-0.712994	0.779928	0.954925	1.18274	1.2391	1.301	1.33427	1.37	1.44849	1.5404	1.65057
34	6028	-3.38257	-2.86884	-2.38811	-2.11555	-1.92316	-1.7762	-1.65381	-1.55075	-1.50405	-1.46043	-1.38084	-1.30857	-1.02142	-0.805782	0.861884	1.05923	1.3153	1.37899	1.44849	1.48633	1.52628	1.61481	1.71814	1.84191
35	6206	-5.07621	-4.34665	-3.6536	-3.25543	-2.97205	-2.75107	-2.57044	-2.41597	-2.34625	-2.28111	-2.16091	-2.05236	-1.61986	-1.29216	1.26074	1.56605	1.96894	2.06893	2.1796	2.24037	2.30383	2.44535	2.61102	2.81247
36	6384	-3.27327	-2.79465	-2.34181	-2.08075	-1.89731	-1.75343	-1.63564	-1.53506	-1.48919	-1.44673	-1.36866	-1.29784	-1.01718	-0.804959	0.851778	1.04805	1.30434	1.36779	1.43818	1.47619	1.51654	1.60487	1.70799	1.83296
37	6562	-2.79872	-2.38599	-1.99423	-1.77263	-1.61587	-1.49312	-1.39231	-1.30602	-1.26731	-1.23089	-1.1643	-1.10346	-0.862452	-0.679435	0.747635	0.914729	1.13149	1.18501	1.2436	1.27542	1.3092	1.38297	1.46951	1.57388
38	6740	-2.24296	-1.9342	-1.6349	-1.46075	-1.33631	-1.23835	-1.15674	-1.08732	-1.05589	-1.02634	-0.971602	-0.921871	-0.722247	-0.570259	0.634581	0.776056	0.959496	1.00508	1.05477	1.08174	1.11038	1.17307	1.24637	1.33428
39	6918	-1.8304	-1.58342	-1.33952	-1.19657	-1.09459	-1.0144	-0.948163	-0.890942	-0.864646	-0.840213	-0.795254	-0.754628	-0.590665	-0.465314	0.531382	0.647721	0.797975	0.835195	0.875652	0.897717	0.920824	0.97131	1.03004	1.10063
40	7096	-2.6133	-2.20766	-1.82841	-1.61298	-1.46331	-1.34841	-1.25428	-1.17478	-1.139	-1.10553	-1.04409	-0.988538	-0.769343	-0.606011	0.647163	0.802012	1.01004	1.06323	1.12182	1.15366	1.18805	1.26415	1.35395	1.4653
41	7274	-2.47244	-2.10462	-1.76026	-1.56291	-1.42318	-1.31429	-1.22507	-1.1493	-1.11507	-1.08294	-1.02383	-0.970491	-0.756378	-0.595549	0.653587	0.799167	0.988608	1.03522	1.08646	1.11419	1.14368	1.20853	1.28386	1.37442
42	7452	-2.62788	-2.17391	-1.77256	-1.55199	-1.40021	-1.2849	-1.19018	-1.11065	-1.07492	-1.04132	-0.980728	-0.925877	-0.711931	-0.553739	0.631019	0.769367	0.947682	0.991845	1.04019	1.06677	1.09472	1.15622	1.22737	1.31251
43	7630	-2.53065	-2.15578	-1.79449	-1.58959	-1.44588	-1.33435	-1.24214	-1.16383	-1.12923	-1.096	-1.03543	-0.980327	-0.762062	-0.597966	0.666056	0.813399	1.00343	1.05041	1.10178	1.12966	1.15947	1.22455	1.30014	1.39125
44	7808	-3.13798	-2.63416	-2.17234	-1.91141	-1.73117	-1.59123	-1.47794	-1.3816	-1.33817	-1.29763	-1.22376	-1.15665	-0.894728	-0.699529	0.765533	0.934678	1.1559	1.21055	1.27081	1.30348	1.33799	1.41401	1.50209	1.60813
45	7986	-2.70429	-2.28252	-1.88282	-1.66096	-1.5031	-1.38254	-1.28372	-1.2	-1.16307	-1.12753	-1.06311	-1.00491	-0.776499	-0.605684	0.682858	0.831168	1.02185	1.06902	1.12078	1.14889	1.1783	1.2432	1.31866	1.40888
46	8164	-2.32313	-1.97042	-1.63815	-1.44759	-1.3148	-1.21157	-1.12647	-1.05486	-1.02252	-0.992032	-0.936108	-0.885511	-0.686382	-0.536953	0.603886	0.736459	0.908424	0.950835	0.997913	1.02341	1.05042	1.11009	1.17902	1.26142
47	8342	-2.38654	-2.00468	-1.65133	-1.45261	-1.31438	-1.20778	-1.12016	-1.04712	-1.01412	-0.983102	-0.926349	-0.875357	-0.674808	-0.525873	0.595337	0.729318	0.905848	0.950235	0.999223	1.02614	1.05415	1.11713	1.19126	1.28075
48	8520	-1.91542	-1.61059	-1.3307	-1.17156	-1.0606	-0.974919	-0.904735	-0.845942	-0.819175	-0.794128	-0.747813	-0.706789	-0.544522	-0.42325	0.494145	0.602075	0.743204	0.778348	0.817022	0.838035	0.86051	0.909344	0.966997	1.0361
49	8698	-3.22761	-2.73066	-2.26236	-1.99954	-1.81477	-1.67161	-1.55488	-1.45502	-1.41057	-1.36904	-1.29209	-1.22269	-0.94881	-0.743803	0.813631	0.9978	1.23844	1.29872	1.36569	1.40159	1.44019	1.52585	1.62527	1.74612
50	8876	-2.08348	-1.731	-1.41042	-1.23387	-1.11186	-1.01939	-0.943344	-0.879867	-0.851369	-0.824854	-0.776134	-0.732587	-0.562459	-0.437723	0.493846	0.611832	0.772398	0.814135	0.860436	0.885956	0.913291	0.974916	1.04854	1.13959
51	9054	-3.1767	-2.59881	-2.0887	-1.81543	-1.63011	-1.48878	-1.37591	-1.28154	-1.23976	-1.20023	-1.12855	-1.06505	-0.817831	-0.637453	0.695091	0.865289	1.099	1.15897	1.22681	1.26385	1.30356	1.39368	1.50207	1.63724
52	9232	-4.38887	-3.35886	-2.53252	-2.12189	-1.85477	-1.66068	-1.50955	-1.38567	-1.3316	-1.28221	-1.19269	-1.11401	-0.819267	-0.615376	0.755726	0.923577	1.15099	1.20924	1.27428	1.31011	1.3484	1.43403	1.53626	1.66288
53	9410	-3.02761	-2.43736	-1.93028	-1.65946	-1.47897	-1.34364	-1.23543	-1.14549	-1.1061	-1.06892	-1.00122	-0.941454	-0.710991	-0.545521	0.644333	0.790966	0.988775	1.03947	1.09625	1.12707	1.1602	1.23406	1.32152	1.42936
54	9430	-3.24036	-2.4538	-1.83158	-1.52505	-1.3263	-1.18408	-1.07217	-0.981116	-0.941651	-0.905146	-0.839357	-0.782065	-0.567841	-0.420069	0.562476	0.679385	0.836282	0.876235	0.920616	0.944657	0.970755	1.02785	1.09571	1.17932
55	0	0.005	0.01	0.02	0.03	0.04	0.05	0.06	0.07	0.075	0.08	0.09	0.1	0.15	0.2	0.8	0.85	0.9	0.91	0.92	0.925	0.93	0.94	0.95	0.96
