# Supplementary material for: Time-varying asymmetry and tail thickness in long series of daily financial returns
Source: publisher site journal article supplement (doi:10.1515/snde-2017-0071), 2018-10-02
Supplement: Supplementary file 495 [file r_1.xlsx]

## Sheet: 1
	Var1	Var2	Var3	Var4	Var5	Var6	Var7	Var8	Var9	Var10	Var11	Var12	Var13	Var14	Var15	Var16	Var17	Var18	Var19	Var20	Var21	Var22	Var23	Var24	Var25
1	0	0.000549085	0.000400684	0.000779107	0.000523971	0.000637452	0.000378424	0.000534245	0.000540052	0.000955477	0.000580992	0.000528174	0.000431506	0.000450769	0.000416711	0.000527216	0.000506127	0.000307191	0.000460786	0.000542102	0.000284356	0.000400684	0.000447823	0.000534245	0.000309619
2	0	2.96775	2.9835	2.997	3.008	3.02	3.0345	3.0495	3.06125	3.07025	3.0785	3.089	3.101	3.1135	3.12575	3.13675	3.14625	3.1585	3.171	3.18025	3.19225	3.20525	3.21475	3.22275	3.232
3	0	37	36	35	34	35	34	32	31	31	29	29	28	27	26	25	24	23	23	23	22	21	19	20	17
4	2.961	2.9745	2.9925	3.0015	3.0145	3.0255	3.0435	3.0555	3.067	3.0735	3.0835	3.0945	3.1075	3.1195	3.132	3.1415	3.151	3.166	3.176	3.1845	3.2	3.2105	3.219	3.2265	3.2375
