# Supplementary material for: Time-varying asymmetry and tail thickness in long series of daily financial returns
Source: publisher site journal article supplement (doi:10.1515/snde-2017-0071), 2018-10-02
Supplement: Supplementary file 497 [file r_2.xlsx]

## Sheet: 1
	Var1	Var2	Var3	Var4	Var5	Var6	Var7	Var8	Var9	Var10	Var11	Var12	Var13	Var14	Var15	Var16	Var17	Var18	Var19	Var20	Var21	Var22	Var23	Var24	Var25
1	0	0.000433427	0.000755594	0.000860799	0.00115281	0.000690165	0.00218565	0.000599878	0.000983981	0.000988572	0.000998198	0.00102923	0.00260266	0.00122026	0.00156199	0.000965014	0.000829001	0.000764351	0.00170666	0.00108353	0.00149366	0.000985799	0.000810336	0.00112299	0.000811248
2	0	6.36254	6.36654	6.36928	6.37152	6.37407	6.37617	6.37851	6.38147	6.3837	6.38592	6.3881	6.38959	6.39092	6.39252	6.39437	6.39684	6.39961	6.4017	6.40336	6.40512	6.40697	6.40945	6.41179	6.41413
3	0	11	11	11	11	11	11	11	11	11	11	11	11	11	11	11	11	11	11	11	11	11	11	11	11
4	6.36	6.36508	6.368	6.37056	6.37247	6.37567	6.37667	6.38035	6.38259	6.38482	6.38702	6.38917	6.39001	6.39182	6.39323	6.39551	6.39817	6.40105	6.40235	6.40438	6.40586	6.40809	6.41081	6.41277	6.41549
