# Supplementary material for: Time-varying asymmetry and tail thickness in long series of daily financial returns
Source: publisher site journal article supplement (doi:10.1515/snde-2017-0071), 2018-10-02
Supplement: Supplementary file 499 [file theta_max.xlsx]

## Sheet: 1
	Var1
1	0.305971
2	-0.510479
3	-0.00640806
4	-4.66455
5	-1.871
6	2.32339
7	-4.91248
8	-1.76172
9	0.0173409
10	1.33063
11	1.67038
12	0.163943
13	-0.0993015
14	-0.224186
15	-0.201317
16	-0.886893
17	1.39058
18	-0.881022
19	0.361138
20	-0.516529
21	-0.278731
22	0.867986
23	0.456349
24	-0.78701
25	-0.55955
26	0.746211
27	-0.283713
28	-1.21897
29	1.17713
30	-0.930607
31	-10.1297
32	-6.32516
33	-4.47621
34	-9.7854
35	0.730971
36	-4.85846
