# Supplementary material for: Time-varying asymmetry and tail thickness in long series of daily financial returns
Source: publisher site journal article supplement (doi:10.1515/snde-2017-0071), 2018-10-02
Supplement: Supplementary file 501 [file sp500_data.xlsx]

## Sheet: data
S&P500 DAILY RETURNS							DATA
Date	Open	High	Low	Close	Volume	Adj Close	daily returns
1950-01-03	16.66	16.66	16.66	16.66	1260000	16.66
1950-01-04	16.85	16.85	16.85	16.85	1890000	16.85	1.134
1950-01-05	16.93	16.93	16.93	16.93	2550000	16.93	0.473654
1950-01-06	16.98	16.98	16.98	16.98	2010000	16.98	0.294898
1950-01-09	17.08	17.08	17.08	17.08	2520000	17.08	0.587201
1950-01-10	17.03	17.03	17.03	17.03	2160000	17.03	-0.293169
1950-01-11	17.09	17.09	17.09	17.09	2630000	17.09	0.3517
1950-01-12	16.76	16.76	16.76	16.76	2970000	16.76	-1.94984
1950-01-13	16.67	16.67	16.67	16.67	3330000	16.67	-0.53844
1950-01-16	16.72	16.72	16.72	16.72	1460000	16.72	0.299491
1950-01-17	16.86	16.86	16.86	16.86	1790000	16.86	0.833834
1950-01-18	16.85	16.85	16.85	16.85	1570000	16.85	-0.0593296
1950-01-19	16.87	16.87	16.87	16.87	1170000	16.87	0.118624
1950-01-20	16.9	16.9	16.9	16.9	1440000	16.9	0.177673
1950-01-23	16.92	16.92	16.92	16.92	1340000	16.92	0.118273
1950-01-24	16.86	16.86	16.86	16.86	1250000	16.86	-0.35524
1950-01-25	16.74	16.74	16.74	16.74	1700000	16.74	-0.714289
1950-01-26	16.73	16.73	16.73	16.73	1150000	16.73	-0.059755
1950-01-27	16.82	16.82	16.82	16.82	1250000	16.82	0.536514
1950-01-30	17.02	17.02	17.02	17.02	1640000	17.02	1.18205
1950-01-31	17.05	17.05	17.05	17.05	1690000	17.05	0.176108
1950-02-01	17.05	17.05	17.05	17.05	1810000	17.05	0
1950-02-02	17.23	17.23	17.23	17.23	2040000	17.23	1.05018
1950-02-03	17.29	17.29	17.29	17.29	2210000	17.29	0.347625
1950-02-06	17.32	17.32	17.32	17.32	1490000	17.32	0.17336
1950-02-07	17.23	17.23	17.23	17.23	1360000	17.23	-0.520985
1950-02-08	17.21	17.21	17.21	17.21	1470000	17.21	-0.116144
1950-02-09	17.28	17.28	17.28	17.28	1810000	17.28	0.405915
1950-02-10	17.24	17.24	17.24	17.24	1790000	17.24	-0.23175
1950-02-14	17.06	17.06	17.06	17.06	2210000	17.06	-1.04957
1950-02-15	17.06	17.06	17.06	17.06	1730000	17.06	0
1950-02-16	16.99	16.99	16.99	16.99	1920000	16.99	-0.411161
1950-02-17	17.15	17.15	17.15	17.15	1940000	17.15	0.937324
1950-02-20	17.2	17.2	17.2	17.2	1420000	17.2	0.291121
1950-02-21	17.17	17.17	17.17	17.17	1260000	17.17	-0.174571
1950-02-23	17.21	17.21	17.21	17.21	1310000	17.21	0.232694
1950-02-24	17.28	17.28	17.28	17.28	1710000	17.28	0.405915
1950-02-27	17.28	17.28	17.28	17.28	1410000	17.28	0
1950-02-28	17.22	17.22	17.22	17.22	1310000	17.22	-0.347826
1950-03-01	17.24	17.24	17.24	17.24	1410000	17.24	0.116077
1950-03-02	17.23	17.23	17.23	17.23	1340000	17.23	-0.0580215
1950-03-03	17.29	17.29	17.29	17.29	1520000	17.29	0.347625
1950-03-06	17.32	17.32	17.32	17.32	1470000	17.32	0.17336
1950-03-07	17.2	17.2	17.2	17.2	1590000	17.2	-0.695252
1950-03-08	17.19	17.19	17.19	17.19	1360000	17.19	-0.0581564
1950-03-09	17.07	17.07	17.07	17.07	1330000	17.07	-0.700528
1950-03-10	17.09	17.09	17.09	17.09	1260000	17.09	0.117096
1950-03-13	17.12	17.12	17.12	17.12	1060000	17.12	0.175387
1950-03-14	17.25	17.25	17.25	17.25	1140000	17.25	0.756477
1950-03-15	17.45	17.45	17.45	17.45	1830000	17.45	1.15275
1950-03-16	17.49	17.49	17.49	17.49	2060000	17.49	0.228964
1950-03-17	17.45	17.45	17.45	17.45	1600000	17.45	-0.228964
1950-03-20	17.44	17.44	17.44	17.44	1430000	17.44	-0.057323
1950-03-21	17.45	17.45	17.45	17.45	1400000	17.45	0.057323
1950-03-22	17.55	17.55	17.55	17.55	2010000	17.55	0.57143
1950-03-23	17.56	17.56	17.56	17.56	2020000	17.56	0.0569638
1950-03-24	17.56	17.56	17.56	17.56	1570000	17.56	0
1950-03-27	17.46	17.46	17.46	17.46	1930000	17.46	-0.571104
1950-03-28	17.53	17.53	17.53	17.53	1780000	17.53	0.400115
1950-03-29	17.44	17.44	17.44	17.44	2090000	17.44	-0.514728
1950-03-30	17.3	17.3	17.3	17.3	2370000	17.3	-0.805992
1950-03-31	17.29	17.29	17.29	17.29	1880000	17.29	-0.0578202
1950-04-03	17.53	17.53	17.53	17.53	1570000	17.53	1.37854
1950-04-04	17.55	17.55	17.55	17.55	2010000	17.55	0.114025
1950-04-05	17.63	17.63	17.63	17.63	1430000	17.63	0.454805
1950-04-06	17.78	17.78	17.78	17.78	2000000	17.78	0.847223
1950-04-10	17.85	17.85	17.85	17.85	2070000	17.85	0.392928
1950-04-11	17.75	17.75	17.75	17.75	2010000	17.75	-0.561799
1950-04-12	17.94	17.94	17.94	17.94	2010000	17.94	1.06473
1950-04-13	17.98	17.98	17.98	17.98	2410000	17.98	0.222717
1950-04-14	17.96	17.96	17.96	17.96	2750000	17.96	-0.111297
1950-04-17	17.88	17.88	17.88	17.88	2520000	17.88	-0.446429
1950-04-18	18.03	18.03	18.03	18.03	3320000	18.03	0.835427
1950-04-19	18.05	18.05	18.05	18.05	2950000	18.05	0.110865
1950-04-20	17.93	17.93	17.93	17.93	2590000	17.93	-0.66704
1950-04-21	17.96	17.96	17.96	17.96	2710000	17.96	0.167178
1950-04-24	17.83	17.83	17.83	17.83	2310000	17.83	-0.726463
1950-04-25	17.83	17.83	17.83	17.83	1830000	17.83	0
1950-04-26	17.76	17.76	17.76	17.76	1880000	17.76	-0.393369
1950-04-27	17.86	17.86	17.86	17.86	2070000	17.86	0.561484
1950-04-28	17.96	17.96	17.96	17.96	2190000	17.96	0.558349
1950-05-01	18.22	18.22	18.22	18.22	2390000	18.22	1.43728
1950-05-02	18.11	18.11	18.11	18.11	2250000	18.11	-0.605562
1950-05-03	18.27	18.27	18.27	18.27	2120000	18.27	0.87961
1950-05-04	18.12	18.12	18.12	18.12	2150000	18.12	-0.824407
1950-05-05	18.22	18.22	18.22	18.22	1800000	18.22	0.550359
1950-05-08	18.27	18.27	18.27	18.27	1680000	18.27	0.274048
1950-05-09	18.27	18.27	18.27	18.27	1720000	18.27	0
1950-05-10	18.29	18.29	18.29	18.29	1880000	18.29	0.109409
1950-05-11	18.29	18.29	18.29	18.29	1750000	18.29	0
1950-05-12	18.18	18.18	18.18	18.18	1790000	18.18	-0.603237
1950-05-15	18.26	18.26	18.26	18.26	1220000	18.26	0.439079
1950-05-16	18.44	18.44	18.44	18.44	1730000	18.44	0.980934
1950-05-17	18.52	18.52	18.52	18.52	2020000	18.52	0.432901
1950-05-18	18.56	18.56	18.56	18.56	5240000	18.56	0.21575
1950-05-19	18.68	18.68	18.68	18.68	2110000	18.68	0.644471
1950-05-22	18.6	18.6	18.6	18.6	1620000	18.6	-0.429185
1950-05-23	18.71	18.71	18.71	18.71	1460000	18.71	0.589656
1950-05-24	18.69	18.69	18.69	18.69	1850000	18.69	-0.106952
1950-05-25	18.69	18.69	18.69	18.69	1480000	18.69	0
1950-05-26	18.67	18.67	18.67	18.67	1330000	18.67	-0.107066
1950-05-29	18.72	18.72	18.72	18.72	1110000	18.72	0.267451
1950-05-31	18.78	18.78	18.78	18.78	1530000	18.78	0.32
1950-06-01	18.77	18.77	18.77	18.77	1580000	18.77	-0.0532623
1950-06-02	18.79	18.79	18.79	18.79	1450000	18.79	0.106496
1950-06-05	18.6	18.6	18.6	18.6	1630000	18.6	-1.01632
1950-06-06	18.88	18.88	18.88	18.88	2250000	18.88	1.49416
1950-06-07	18.93	18.93	18.93	18.93	1750000	18.93	0.26448
1950-06-08	19.14	19.14	19.14	19.14	1780000	19.14	1.10324
1950-06-09	19.26	19.26	19.26	19.26	2130000	19.26	0.625002
1950-06-12	19.4	19.4	19.4	19.4	1790000	19.4	0.724266
1950-06-13	19.25	19.25	19.25	19.25	1790000	19.25	-0.776201
1950-06-14	18.98	18.98	18.98	18.98	1650000	18.98	-1.41253
1950-06-15	18.93	18.93	18.93	18.93	1530000	18.93	-0.263783
1950-06-16	18.97	18.97	18.97	18.97	1180000	18.97	0.211082
1950-06-19	18.92	18.92	18.92	18.92	1290000	18.92	-0.263922
1950-06-20	18.83	18.83	18.83	18.83	1470000	18.83	-0.476822
1950-06-21	19	19	19	19	1750000	19	0.898764
1950-06-22	19.16	19.16	19.16	19.16	1830000	19.16	0.838579
1950-06-23	19.14	19.14	19.14	19.14	1700000	19.14	-0.104439
1950-06-26	18.11	18.11	18.11	18.11	3950000	18.11	-5.53161
1950-06-27	17.91	17.91	17.91	17.91	4860000	17.91	-1.11051
1950-06-28	18.11	18.11	18.11	18.11	2600000	18.11	1.11051
1950-06-29	17.44	17.44	17.44	17.44	3040000	17.44	-3.76979
1950-06-30	17.69	17.69	17.69	17.69	2660000	17.69	1.42331
1950-07-03	17.64	17.64	17.64	17.64	1550000	17.64	-0.283046
1950-07-05	17.81	17.81	17.81	17.81	1400000	17.81	0.959105
1950-07-06	17.91	17.91	17.91	17.91	1570000	17.91	0.559912
1950-07-07	17.67	17.67	17.67	17.67	1870000	17.67	-1.34909
1950-07-10	17.59	17.59	17.59	17.59	1960000	17.59	-0.453773
1950-07-11	17.32	17.32	17.32	17.32	3250000	17.32	-1.54687
1950-07-12	16.87	16.87	16.87	16.87	3200000	16.87	-2.6325
1950-07-13	16.69	16.69	16.69	16.69	2660000	16.69	-1.07272
1950-07-14	16.87	16.87	16.87	16.87	1900000	16.87	1.07272
1950-07-17	16.68	16.68	16.68	16.68	1520000	16.68	-1.13265
1950-07-18	17.06	17.06	17.06	17.06	1820000	17.06	2.25261
1950-07-19	17.36	17.36	17.36	17.36	2430000	17.36	1.74322
1950-07-20	17.61	17.61	17.61	17.61	3160000	17.61	1.42982
1950-07-21	17.59	17.59	17.59	17.59	2810000	17.59	-0.113636
1950-07-24	17.48	17.48	17.48	17.48	2300000	17.48	-0.627319
1950-07-25	17.23	17.23	17.23	17.23	2770000	17.23	-1.44053
1950-07-26	17.27	17.27	17.27	17.27	2460000	17.27	0.231884
1950-07-27	17.5	17.5	17.5	17.5	2300000	17.5	1.323
1950-07-28	17.69	17.69	17.69	17.69	2050000	17.69	1.07986
1950-07-31	17.84	17.84	17.84	17.84	1590000	17.84	0.844362
1950-08-01	18.02	18.02	18.02	18.02	1970000	18.02	1.00391
1950-08-02	17.95	17.95	17.95	17.95	1980000	17.95	-0.389214
1950-08-03	17.99	17.99	17.99	17.99	1660000	17.99	0.222593
1950-08-04	18.14	18.14	18.14	18.14	1600000	18.14	0.83034
1950-08-07	18.41	18.41	18.41	18.41	1850000	18.41	1.47746
1950-08-08	18.46	18.46	18.46	18.46	2180000	18.46	0.271223
1950-08-09	18.61	18.61	18.61	18.61	1760000	18.61	0.809284
1950-08-10	18.48	18.48	18.48	18.48	1870000	18.48	-0.701
1950-08-11	18.28	18.28	18.28	18.28	1680000	18.28	-1.08815
1950-08-14	18.29	18.29	18.29	18.29	1280000	18.29	0.0546896
1950-08-15	18.32	18.32	18.32	18.32	1330000	18.32	0.16389
1950-08-16	18.34	18.34	18.34	18.34	1770000	18.34	0.109111
1950-08-17	18.54	18.54	18.54	18.54	2170000	18.54	1.08461
1950-08-18	18.68	18.68	18.68	18.68	1780000	18.68	0.752287
1950-08-21	18.7	18.7	18.7	18.7	1840000	18.7	0.107009
1950-08-22	18.68	18.68	18.68	18.68	1550000	18.68	-0.107009
1950-08-23	18.82	18.82	18.82	18.82	1580000	18.82	0.74667
1950-08-24	18.79	18.79	18.79	18.79	1620000	18.79	-0.159532
1950-08-25	18.54	18.54	18.54	18.54	1610000	18.54	-1.33943
1950-08-28	18.53	18.53	18.53	18.53	1300000	18.53	-0.053952
1950-08-29	18.54	18.54	18.54	18.54	1890000	18.54	0.053952
1950-08-30	18.43	18.43	18.43	18.43	1490000	18.43	-0.595079
1950-08-31	18.42	18.42	18.42	18.42	1140000	18.42	-0.0542741
1950-09-01	18.55	18.55	18.55	18.55	1290000	18.55	0.703276
1950-09-05	18.68	18.68	18.68	18.68	1250000	18.68	0.698364
1950-09-06	18.54	18.54	18.54	18.54	1300000	18.54	-0.752287
1950-09-07	18.59	18.59	18.59	18.59	1340000	18.59	0.269324
1950-09-08	18.75	18.75	18.75	18.75	1960000	18.75	0.856995
1950-09-11	18.61	18.61	18.61	18.61	1860000	18.61	-0.749468
1950-09-12	18.87	18.87	18.87	18.87	1680000	18.87	1.38743
1950-09-13	19.09	19.09	19.09	19.09	2600000	19.09	1.15913
1950-09-14	19.18	19.18	19.18	19.18	2350000	19.18	0.470343
1950-09-15	19.29	19.29	19.29	19.29	2410000	19.29	0.571876
1950-09-18	19.37	19.37	19.37	19.37	2040000	19.37	0.413865
1950-09-19	19.31	19.31	19.31	19.31	1590000	19.31	-0.310238
1950-09-20	19.21	19.21	19.21	19.21	2100000	19.21	-0.519212
1950-09-21	19.37	19.37	19.37	19.37	1650000	19.37	0.82945
1950-09-22	19.44	19.44	19.44	19.44	2510000	19.44	0.360732
1950-09-25	19.42	19.42	19.42	19.42	2020000	19.42	-0.102934
1950-09-26	19.14	19.14	19.14	19.14	2280000	19.14	-1.45231
1950-09-27	19.41	19.41	19.41	19.41	2360000	19.41	1.4008
1950-09-28	19.42	19.42	19.42	19.42	2200000	19.42	0.0515066
1950-09-29	19.45	19.45	19.45	19.45	1800000	19.45	0.154361
1950-10-02	19.69	19.69	19.69	19.69	2200000	19.69	1.22638
1950-10-03	19.66	19.66	19.66	19.66	2480000	19.66	-0.152478
1950-10-04	20	20	20	20	2920000	20	1.71462
1950-10-05	19.89	19.89	19.89	19.89	2490000	19.89	-0.551518
1950-10-06	20.12	20.12	20.12	20.12	2360000	20.12	1.14973
1950-10-09	20	20	20	20	2330000	20	-0.598207
1950-10-10	19.78	19.78	19.78	19.78	1870000	19.78	-1.10609
1950-10-11	19.86	19.86	19.86	19.86	2200000	19.86	0.403633
1950-10-13	19.85	19.85	19.85	19.85	2030000	19.85	-0.0503651
1950-10-16	19.71	19.71	19.71	19.71	1630000	19.71	-0.707789
1950-10-17	19.89	19.89	19.89	19.89	2010000	19.89	0.909097
1950-10-18	20.01	20.01	20.01	20.01	2410000	20.01	0.601506
1950-10-19	20.02	20.02	20.02	20.02	2250000	20.02	0.0499625
1950-10-20	19.96	19.96	19.96	19.96	1840000	19.96	-0.30015
1950-10-23	19.96	19.96	19.96	19.96	1850000	19.96	0
1950-10-24	20.08	20.08	20.08	20.08	1790000	20.08	0.599402
1950-10-25	20.05	20.05	20.05	20.05	1930000	20.05	-0.149514
1950-10-26	19.61	19.61	19.61	19.61	3000000	19.61	-2.21895
1950-10-27	19.77	19.77	19.77	19.77	1800000	19.77	0.8126
1950-10-30	19.61	19.61	19.61	19.61	1790000	19.61	-0.8126
1950-10-31	19.53	19.53	19.53	19.53	2010000	19.53	-0.40879
1950-11-01	19.56	19.56	19.56	19.56	1780000	19.56	0.153492
1950-11-02	19.73	19.73	19.73	19.73	1580000	19.73	0.865366
1950-11-03	19.85	19.85	19.85	19.85	1560000	19.85	0.606369
1950-11-06	19.36	19.36	19.36	19.36	2580000	19.36	-2.49949
1950-11-08	19.56	19.56	19.56	19.56	1850000	19.56	1.02776
1950-11-09	19.79	19.79	19.79	19.79	1760000	19.79	1.16901
1950-11-10	19.94	19.94	19.94	19.94	1640000	19.94	0.7551
1950-11-13	20.01	20.01	20.01	20.01	1630000	20.01	0.350438
1950-11-14	19.86	19.86	19.86	19.86	1780000	19.86	-0.752449
1950-11-15	19.82	19.82	19.82	19.82	1620000	19.82	-0.201613
1950-11-16	19.72	19.72	19.72	19.72	1760000	19.72	-0.505818
1950-11-17	19.86	19.86	19.86	19.86	2130000	19.86	0.707431
1950-11-20	19.93	19.93	19.93	19.93	2250000	19.93	0.351848
1950-11-21	19.88	19.88	19.88	19.88	2010000	19.88	-0.251193
1950-11-22	20.16	20.16	20.16	20.16	2730000	20.16	1.39862
1950-11-24	20.32	20.32	20.32	20.32	2620000	20.32	0.790518
1950-11-27	20.18	20.18	20.18	20.18	1740000	20.18	-0.691361
1950-11-28	19.56	19.56	19.56	19.56	2970000	19.56	-3.12054
1950-11-29	19.37	19.37	19.37	19.37	2770000	19.37	-0.976119
1950-11-30	19.51	19.51	19.51	19.51	2080000	19.51	0.720168
1950-12-01	19.66	19.66	19.66	19.66	1870000	19.66	0.765896
1950-12-04	19	19	19	19	2510000	19	-3.41471
1950-12-05	19.31	19.31	19.31	19.31	1940000	19.31	1.61841
1950-12-06	19.45	19.45	19.45	19.45	2010000	19.45	0.722397
1950-12-07	19.4	19.4	19.4	19.4	1810000	19.4	-0.2574
1950-12-08	19.4	19.4	19.4	19.4	2310000	19.4	0
1950-12-11	19.72	19.72	19.72	19.72	2600000	19.72	1.63603
1950-12-12	19.68	19.68	19.68	19.68	2140000	19.68	-0.203046
1950-12-13	19.67	19.67	19.67	19.67	2030000	19.67	-0.0508259
1950-12-14	19.43	19.43	19.43	19.43	2660000	19.43	-1.22764
1950-12-15	19.33	19.33	19.33	19.33	2420000	19.33	-0.515997
1950-12-18	19.85	19.85	19.85	19.85	4500000	19.85	2.65457
1950-12-19	19.96	19.96	19.96	19.96	3650000	19.96	0.552626
1950-12-20	19.97	19.97	19.97	19.97	3510000	19.97	0.0500877
1950-12-21	19.98	19.98	19.98	19.98	3990000	19.98	0.0500626
1950-12-22	20.07	20.07	20.07	20.07	2720000	20.07	0.449439
1950-12-26	19.92	19.92	19.92	19.92	2660000	19.92	-0.750191
1950-12-27	20.3	20.3	20.3	20.3	2940000	20.3	1.88966
1950-12-28	20.38	20.38	20.38	20.38	3560000	20.38	0.393314
1950-12-29	20.43	20.43	20.43	20.43	3440000	20.43	0.245038
1951-01-02	20.77	20.77	20.77	20.77	3030000	20.77	1.65052
1951-01-03	20.69	20.69	20.69	20.69	3370000	20.69	-0.385915
1951-01-04	20.87	20.87	20.87	20.87	3390000	20.87	0.866223
1951-01-05	20.87	20.87	20.87	20.87	3390000	20.87	0
1951-01-08	21	21	21	21	2780000	21	0.620972
1951-01-09	21.12	21.12	21.12	21.12	3800000	21.12	0.569802
1951-01-10	20.85	20.85	20.85	20.85	3270000	20.85	-1.28665
1951-01-11	21.19	21.19	21.19	21.19	3490000	21.19	1.61754
1951-01-12	21.11	21.11	21.11	21.11	2950000	21.11	-0.378251
1951-01-15	21.3	21.3	21.3	21.3	2830000	21.3	0.896021
1951-01-16	21.46	21.46	21.46	21.46	3740000	21.46	0.748366
1951-01-17	21.55	21.55	21.55	21.55	3880000	21.55	0.418508
1951-01-18	21.4	21.4	21.4	21.4	3490000	21.4	-0.698489
1951-01-19	21.36	21.36	21.36	21.36	3170000	21.36	-0.187091
1951-01-22	21.18	21.18	21.18	21.18	2570000	21.18	-0.846267
1951-01-23	21.26	21.26	21.26	21.26	2080000	21.26	0.377003
1951-01-24	21.16	21.16	21.16	21.16	1990000	21.16	-0.471477
1951-01-25	21.03	21.03	21.03	21.03	2520000	21.03	-0.616262
1951-01-26	21.26	21.26	21.26	21.26	2230000	21.26	1.08774
1951-01-29	21.67	21.67	21.67	21.67	2630000	21.67	1.91014
1951-01-30	21.74	21.74	21.74	21.74	2480000	21.74	0.322507
1951-01-31	21.66	21.66	21.66	21.66	2340000	21.66	-0.368664
1951-02-01	21.77	21.77	21.77	21.77	2380000	21.77	0.506563
1951-02-02	21.96	21.96	21.96	21.96	3030000	21.96	0.868974
1951-02-05	22.2	22.2	22.2	22.2	2680000	22.2	1.08697
1951-02-06	22.12	22.12	22.12	22.12	2370000	22.12	-0.361011
1951-02-07	21.99	21.99	21.99	21.99	2020000	21.99	-0.589437
1951-02-08	22.09	22.09	22.09	22.09	2120000	22.09	0.453721
1951-02-09	22.17	22.17	22.17	22.17	2550000	22.17	0.361501
1951-02-13	22.18	22.18	22.18	22.18	2400000	22.18	0.0450958
1951-02-14	22.12	22.12	22.12	22.12	2050000	22.12	-0.270881
1951-02-15	22	22	22	22	1700000	22	-0.543972
1951-02-16	22.13	22.13	22.13	22.13	1860000	22.13	0.58917
1951-02-19	21.83	21.83	21.83	21.83	1910000	21.83	-1.3649
1951-02-20	21.79	21.79	21.79	21.79	2010000	21.79	-0.183402
1951-02-21	21.86	21.86	21.86	21.86	1670000	21.86	0.320733
1951-02-23	21.92	21.92	21.92	21.92	1540000	21.92	0.274098
1951-02-26	21.93	21.93	21.93	21.93	1650000	21.93	0.04561
1951-02-27	21.76	21.76	21.76	21.76	1680000	21.76	-0.778214
1951-02-28	21.8	21.8	21.8	21.8	1640000	21.8	0.183655
1951-03-01	21.85	21.85	21.85	21.85	1610000	21.85	0.229095
1951-03-02	21.93	21.93	21.93	21.93	1570000	21.93	0.365464
1951-03-05	21.79	21.79	21.79	21.79	1690000	21.79	-0.640441
1951-03-06	21.79	21.79	21.79	21.79	1490000	21.79	0
1951-03-07	21.86	21.86	21.86	21.86	1770000	21.86	0.320733
1951-03-08	21.95	21.95	21.95	21.95	1440000	21.95	0.410866
1951-03-09	21.95	21.95	21.95	21.95	1610000	21.95	0
1951-03-12	21.7	21.7	21.7	21.7	1640000	21.7	-1.14549
1951-03-13	21.41	21.41	21.41	21.41	2330000	21.41	-1.34542
1951-03-14	21.25	21.25	21.25	21.25	2110000	21.25	-0.750121
1951-03-15	21.29	21.29	21.29	21.29	2070000	21.29	0.188058
1951-03-16	21.64	21.64	21.64	21.64	1660000	21.64	1.6306
1951-03-19	21.56	21.56	21.56	21.56	1120000	21.56	-0.370371
1951-03-20	21.52	21.52	21.52	21.52	1020000	21.52	-0.185701
1951-03-21	21.64	21.64	21.64	21.64	1310000	21.64	0.556072
1951-03-22	21.73	21.73	21.73	21.73	1290000	21.73	0.415034
1951-03-26	21.53	21.53	21.53	21.53	1230000	21.53	-0.924648
1951-03-27	21.51	21.51	21.51	21.51	1250000	21.51	-0.0929368
1951-03-28	21.26	21.26	21.26	21.26	1770000	21.26	-1.16906
1951-03-29	21.33	21.33	21.33	21.33	1300000	21.33	0.328716
1951-03-30	21.48	21.48	21.48	21.48	1150000	21.48	0.700774
1951-04-02	21.32	21.32	21.32	21.32	1280000	21.32	-0.747667
1951-04-03	21.26	21.26	21.26	21.26	1220000	21.26	-0.281823
1951-04-04	21.4	21.4	21.4	21.4	1300000	21.4	0.656355
1951-04-05	21.69	21.69	21.69	21.69	1790000	21.69	1.34604
1951-04-06	21.72	21.72	21.72	21.72	1450000	21.72	0.138217
1951-04-09	21.68	21.68	21.68	21.68	1110000	21.68	-0.184332
1951-04-10	21.65	21.65	21.65	21.65	1280000	21.65	-0.138472
1951-04-11	21.64	21.64	21.64	21.64	1420000	21.64	-0.0462
1951-04-12	21.83	21.83	21.83	21.83	1530000	21.83	0.874172
1951-04-13	22.09	22.09	22.09	22.09	2120000	22.09	1.18398
1951-04-16	22.04	22.04	22.04	22.04	1730000	22.04	-0.226603
1951-04-17	22.09	22.09	22.09	22.09	1470000	22.09	0.226603
1951-04-18	22.13	22.13	22.13	22.13	1780000	22.13	0.180914
1951-04-19	22.04	22.04	22.04	22.04	1520000	22.04	-0.407517
1951-04-20	22.04	22.04	22.04	22.04	940000	22.04	0
1951-04-23	22.05	22.05	22.05	22.05	1160000	22.05	0.0453618
1951-04-24	21.96	21.96	21.96	21.96	1420000	21.96	-0.408999
1951-04-25	21.97	21.97	21.97	21.97	1520000	21.97	0.045527
1951-04-26	22.16	22.16	22.16	22.16	1800000	22.16	0.861098
1951-04-27	22.39	22.39	22.39	22.39	2120000	22.39	1.03256
1951-04-30	22.43	22.43	22.43	22.43	1790000	22.43	0.178492
1951-05-01	22.53	22.53	22.53	22.53	1760000	22.53	0.444841
1951-05-02	22.62	22.62	22.62	22.62	1900000	22.62	0.398672
1951-05-03	22.81	22.81	22.81	22.81	2060000	22.81	0.836457
1951-05-04	22.77	22.77	22.77	22.77	2050000	22.77	-0.175516
1951-05-07	22.63	22.63	22.63	22.63	1580000	22.63	-0.616742
1951-05-08	22.61	22.61	22.61	22.61	1600000	22.61	-0.0884173
1951-05-09	22.64	22.64	22.64	22.64	1960000	22.64	0.132597
1951-05-10	22.51	22.51	22.51	22.51	1660000	22.51	-0.57586
1951-05-11	22.33	22.33	22.33	22.33	1640000	22.33	-0.802859
1951-05-14	22.18	22.18	22.18	22.18	1250000	22.18	-0.674008
1951-05-15	21.76	21.76	21.76	21.76	2020000	21.76	-1.91176
1951-05-16	21.69	21.69	21.69	21.69	1660000	21.69	-0.32221
1951-05-17	21.91	21.91	21.91	21.91	1370000	21.91	1.00918
1951-05-18	21.51	21.51	21.51	21.51	1660000	21.51	-1.84252
1951-05-21	21.46	21.46	21.46	21.46	1580000	21.46	-0.232721
1951-05-22	21.36	21.36	21.36	21.36	1440000	21.36	-0.467072
1951-05-23	21.16	21.16	21.16	21.16	1540000	21.16	-0.940741
1951-05-24	21.05	21.05	21.05	21.05	2580000	21.05	-0.521205
1951-05-25	21.03	21.03	21.03	21.03	1210000	21.03	-0.095057
1951-05-28	21.21	21.21	21.21	21.21	1240000	21.21	0.852278
1951-05-29	21.35	21.35	21.35	21.35	1190000	21.35	0.657897
1951-05-31	21.52	21.52	21.52	21.52	1220000	21.52	0.7931
1951-06-01	21.48	21.48	21.48	21.48	9810000	21.48	-0.186047
1951-06-04	21.24	21.24	21.24	21.24	1100000	21.24	-1.12361
1951-06-05	21.33	21.33	21.33	21.33	1180000	21.33	0.422834
1951-06-06	21.48	21.48	21.48	21.48	1200000	21.48	0.700774
1951-06-07	21.56	21.56	21.56	21.56	1340000	21.56	0.371748
1951-06-08	21.49	21.49	21.49	21.49	1000000	21.49	-0.325204
1951-06-11	21.61	21.61	21.61	21.61	1220000	21.61	0.556846
1951-06-12	21.52	21.52	21.52	21.52	1200000	21.52	-0.417344
1951-06-13	21.55	21.55	21.55	21.55	1060000	21.55	0.139308
1951-06-14	21.84	21.84	21.84	21.84	1300000	21.84	1.33673
1951-06-15	22.04	22.04	22.04	22.04	1370000	22.04	0.911583
1951-06-18	22.05	22.05	22.05	22.05	1050000	22.05	0.0453618
1951-06-19	22.02	22.02	22.02	22.02	1100000	22.02	-0.136147
1951-06-20	21.91	21.91	21.91	21.91	1120000	21.91	-0.500798
1951-06-21	21.78	21.78	21.78	21.78	1100000	21.78	-0.595104
1951-06-22	21.55	21.55	21.55	21.55	1340000	21.55	-1.06163
1951-06-25	21.29	21.29	21.29	21.29	2440000	21.29	-1.21383
1951-06-26	21.3	21.3	21.3	21.3	1260000	21.3	0.0469594
1951-06-27	21.37	21.37	21.37	21.37	1360000	21.37	0.3281
1951-06-28	21.1	21.1	21.1	21.1	1940000	21.1	-1.2715
1951-06-29	20.96	20.96	20.96	20.96	1730000	20.96	-0.665718
1951-07-02	21.1	21.1	21.1	21.1	1350000	21.1	0.665718
1951-07-03	21.23	21.23	21.23	21.23	1250000	21.23	0.614224
1951-07-05	21.64	21.64	21.64	21.64	1410000	21.64	1.91282
1951-07-06	21.64	21.64	21.64	21.64	1170000	21.64	0
1951-07-09	21.73	21.73	21.73	21.73	1110000	21.73	0.415034
1951-07-10	21.63	21.63	21.63	21.63	990000	21.63	-0.461255
1951-07-11	21.68	21.68	21.68	21.68	970000	21.68	0.230894
1951-07-12	21.8	21.8	21.8	21.8	1050000	21.8	0.551979
1951-07-13	21.98	21.98	21.98	21.98	1320000	21.98	0.822298
1951-07-16	21.73	21.73	21.73	21.73	1200000	21.73	-1.14392
1951-07-17	21.92	21.92	21.92	21.92	1280000	21.92	0.870567
1951-07-18	21.88	21.88	21.88	21.88	1370000	21.88	-0.182648
1951-07-19	21.84	21.84	21.84	21.84	1120000	21.84	-0.182983
1951-07-20	21.88	21.88	21.88	21.88	1390000	21.88	0.182983
1951-07-23	22.1	22.1	22.1	22.1	1320000	22.1	1.00046
1951-07-24	22.44	22.44	22.44	22.44	1740000	22.44	1.52675
1951-07-25	22.32	22.32	22.32	22.32	1870000	22.32	-0.536194
1951-07-26	22.47	22.47	22.47	22.47	1480000	22.47	0.669795
1951-07-27	22.53	22.53	22.53	22.53	1450000	22.53	0.266667
1951-07-30	22.63	22.63	22.63	22.63	1600000	22.63	0.442871
1951-07-31	22.4	22.4	22.4	22.4	1550000	22.4	-1.02155
1951-08-01	22.51	22.51	22.51	22.51	1680000	22.51	0.48987
1951-08-02	22.82	22.82	22.82	22.82	2130000	22.82	1.36777
1951-08-03	22.85	22.85	22.85	22.85	1570000	22.85	0.131377
1951-08-06	23.01	23.01	23.01	23.01	1600000	23.01	0.697779
1951-08-07	23.03	23.03	23.03	23.03	1810000	23.03	0.086881
1951-08-08	22.93	22.93	22.93	22.93	1410000	22.93	-0.435162
1951-08-09	22.84	22.84	22.84	22.84	1500000	22.84	-0.393271
1951-08-10	22.79	22.79	22.79	22.79	1260000	22.79	-0.219154
1951-08-13	22.8	22.8	22.8	22.8	1320000	22.8	0.0438693
1951-08-14	22.7	22.7	22.7	22.7	1180000	22.7	-0.439561
1951-08-15	22.79	22.79	22.79	22.79	1340000	22.79	0.395692
1951-08-16	22.87	22.87	22.87	22.87	1750000	22.87	0.350416
1951-08-17	22.94	22.94	22.94	22.94	1620000	22.94	0.30561
1951-08-20	22.93	22.93	22.93	22.93	1130000	22.93	-0.0436015
1951-08-21	22.83	22.83	22.83	22.83	1400000	22.83	-0.437064
1951-08-22	22.75	22.75	22.75	22.75	1130000	22.75	-0.351032
1951-08-23	22.9	22.9	22.9	22.9	1230000	22.9	0.657177
1951-08-24	22.88	22.88	22.88	22.88	1210000	22.88	-0.0873744
1951-08-27	22.85	22.85	22.85	22.85	1080000	22.85	-0.131205
1951-08-28	22.9	22.9	22.9	22.9	1280000	22.9	0.218579
1951-08-29	23.08	23.08	23.08	23.08	1520000	23.08	0.782953
1951-08-30	23.24	23.24	23.24	23.24	1950000	23.24	0.690849
1951-08-31	23.28	23.28	23.28	23.28	1530000	23.28	0.171969
1951-09-04	23.28	23.28	23.28	23.28	1520000	23.28	0
1951-09-05	23.42	23.42	23.42	23.42	1850000	23.42	0.599574
1951-09-06	23.47	23.47	23.47	23.47	2150000	23.47	0.213265
1951-09-07	23.53	23.53	23.53	23.53	1970000	23.53	0.255319
1951-09-10	23.62	23.62	23.62	23.62	2190000	23.62	0.381761
1951-09-11	23.5	23.5	23.5	23.5	2040000	23.5	-0.509339
1951-09-12	23.6	23.6	23.6	23.6	2180000	23.6	0.424629
1951-09-13	23.71	23.71	23.71	23.71	2350000	23.71	0.465019
1951-09-14	23.69	23.69	23.69	23.69	2170000	23.69	-0.0843882
1951-09-17	23.62	23.62	23.62	23.62	1800000	23.62	-0.295921
1951-09-18	23.59	23.59	23.59	23.59	2030000	23.59	-0.127092
1951-09-19	23.59	23.59	23.59	23.59	2070000	23.59	0
1951-09-20	23.57	23.57	23.57	23.57	2100000	23.57	-0.0848176
1951-09-21	23.4	23.4	23.4	23.4	2180000	23.4	-0.723869
1951-09-24	23.3	23.3	23.3	23.3	1630000	23.3	-0.428266
1951-09-25	23.38	23.38	23.38	23.38	1740000	23.38	0.34276
1951-09-26	23.4	23.4	23.4	23.4	1520000	23.4	0.0855066
1951-09-27	23.27	23.27	23.27	23.27	1540000	23.27	-0.557105
1951-09-28	23.26	23.26	23.26	23.26	1390000	23.26	-0.042983
1951-10-01	23.47	23.47	23.47	23.47	1330000	23.47	0.898786
1951-10-02	23.64	23.64	23.64	23.64	1870000	23.64	0.721718
1951-10-03	23.79	23.79	23.79	23.79	2780000	23.79	0.632513
1951-10-04	23.72	23.72	23.72	23.72	1810000	23.72	-0.294675
1951-10-05	23.78	23.78	23.78	23.78	2080000	23.78	0.252632
1951-10-08	23.75	23.75	23.75	23.75	1860000	23.75	-0.126236
1951-10-09	23.65	23.65	23.65	23.65	1750000	23.65	-0.421942
1951-10-10	23.61	23.61	23.61	23.61	1320000	23.61	-0.169276
1951-10-11	23.7	23.7	23.7	23.7	1760000	23.7	0.38047
1951-10-15	23.85	23.85	23.85	23.85	1720000	23.85	0.630917
1951-10-16	23.77	23.77	23.77	23.77	1730000	23.77	-0.335994
1951-10-17	23.69	23.69	23.69	23.69	1460000	23.69	-0.337126
1951-10-18	23.67	23.67	23.67	23.67	1450000	23.67	-0.0844595
1951-10-19	23.32	23.32	23.32	23.32	1990000	23.32	-1.48971
1951-10-22	22.75	22.75	22.75	22.75	2690000	22.75	-2.47462
1951-10-23	22.84	22.84	22.84	22.84	2110000	22.84	0.394824
1951-10-24	23.03	23.03	23.03	23.03	1670000	23.03	0.828433
1951-10-25	22.96	22.96	22.96	22.96	1360000	22.96	-0.304414
1951-10-26	22.81	22.81	22.81	22.81	1710000	22.81	-0.655454
1951-10-29	22.69	22.69	22.69	22.69	1780000	22.69	-0.527474
1951-10-30	22.66	22.66	22.66	22.66	1530000	22.66	-0.132304
1951-10-31	22.94	22.94	22.94	22.94	1490000	22.94	1.22809
1951-11-01	23.1	23.1	23.1	23.1	1430000	23.1	0.695051
1951-11-02	22.93	22.93	22.93	22.93	1230000	22.93	-0.738652
1951-11-05	22.82	22.82	22.82	22.82	1130000	22.82	-0.480875
1951-11-07	22.49	22.49	22.49	22.49	1490000	22.49	-1.45666
1951-11-08	22.47	22.47	22.47	22.47	1410000	22.47	-0.088968
1951-11-09	22.75	22.75	22.75	22.75	1470000	22.75	1.23841
1951-11-13	22.79	22.79	22.79	22.79	1160000	22.79	0.17567
1951-11-14	22.85	22.85	22.85	22.85	1220000	22.85	0.262927
1951-11-15	22.84	22.84	22.84	22.84	1200000	22.84	-0.0437733
1951-11-16	22.82	22.82	22.82	22.82	1140000	22.82	-0.087604
1951-11-19	22.73	22.73	22.73	22.73	1030000	22.73	-0.395171
1951-11-20	22.68	22.68	22.68	22.68	1130000	22.68	-0.220216
1951-11-21	22.64	22.64	22.64	22.64	1090000	22.64	-0.176523
1951-11-23	22.4	22.4	22.4	22.4	1210000	22.4	-1.06573
1951-11-26	22.43	22.43	22.43	22.43	1180000	22.43	0.133839
1951-11-27	22.66	22.66	22.66	22.66	1310000	22.66	1.02019
1951-11-28	22.61	22.61	22.61	22.61	1150000	22.61	-0.220897
1951-11-29	22.67	22.67	22.67	22.67	1070000	22.67	0.265018
1951-11-30	22.88	22.88	22.88	22.88	1530000	22.88	0.92207
1951-12-03	23.01	23.01	23.01	23.01	1220000	23.01	0.566574
1951-12-04	23.14	23.14	23.14	23.14	1280000	23.14	0.563382
1951-12-05	23.07	23.07	23.07	23.07	1330000	23.07	-0.302965
1951-12-06	23.34	23.34	23.34	23.34	1840000	23.34	1.16356
1951-12-07	23.38	23.38	23.38	23.38	1990000	23.38	0.171233
1951-12-10	23.42	23.42	23.42	23.42	1340000	23.42	0.17094
1951-12-11	23.3	23.3	23.3	23.3	1360000	23.3	-0.5137
1951-12-12	23.37	23.37	23.37	23.37	1280000	23.37	0.299979
1951-12-13	23.39	23.39	23.39	23.39	1380000	23.39	0.0855432
1951-12-14	23.37	23.37	23.37	23.37	1360000	23.37	-0.0855432
1951-12-17	23.41	23.41	23.41	23.41	1220000	23.41	0.171013
1951-12-18	23.49	23.49	23.49	23.49	1290000	23.49	0.341152
1951-12-19	23.57	23.57	23.57	23.57	1510000	23.57	0.339992
1951-12-20	23.57	23.57	23.57	23.57	1340000	23.57	0
1951-12-21	23.51	23.51	23.51	23.51	1250000	23.51	-0.254885
1951-12-24	23.54	23.54	23.54	23.54	680000	23.54	0.127524
1951-12-26	23.44	23.44	23.44	23.44	1520000	23.44	-0.425714
1951-12-27	23.65	23.65	23.65	23.65	1460000	23.65	0.891915
1951-12-28	23.69	23.69	23.69	23.69	1470000	23.69	0.16899
1951-12-31	23.77	23.77	23.77	23.77	1440000	23.77	0.337126
1952-01-02	23.8	23.8	23.8	23.8	1070000	23.8	0.12613
1952-01-03	23.88	23.88	23.88	23.88	1220000	23.88	0.335571
1952-01-04	23.92	23.92	23.92	23.92	1480000	23.92	0.167364
1952-01-07	23.91	23.91	23.91	23.91	1540000	23.91	-0.0418148
1952-01-08	23.82	23.82	23.82	23.82	1390000	23.82	-0.377122
1952-01-09	23.74	23.74	23.74	23.74	1370000	23.74	-0.336417
1952-01-10	23.86	23.86	23.86	23.86	1520000	23.86	0.504203
1952-01-11	23.98	23.98	23.98	23.98	1760000	23.98	0.501673
1952-01-14	24.16	24.16	24.16	24.16	1510000	24.16	0.747822
1952-01-15	24.06	24.06	24.06	24.06	1340000	24.06	-0.414766
1952-01-16	24.09	24.09	24.09	24.09	1430000	24.09	0.124611
1952-01-17	24.2	24.2	24.2	24.2	1590000	24.2	0.455582
1952-01-18	24.25	24.25	24.25	24.25	1740000	24.25	0.206398
1952-01-21	24.46	24.46	24.46	24.46	1730000	24.46	0.862251
1952-01-22	24.66	24.66	24.66	24.66	1920000	24.66	0.814337
1952-01-23	24.54	24.54	24.54	24.54	1680000	24.54	-0.487806
1952-01-24	24.56	24.56	24.56	24.56	1570000	24.56	0.0814664
1952-01-25	24.55	24.55	24.55	24.55	1650000	24.55	-0.0407249
1952-01-28	24.61	24.61	24.61	24.61	1590000	24.61	0.244101
1952-01-29	24.57	24.57	24.57	24.57	1730000	24.57	-0.162668
1952-01-30	24.23	24.23	24.23	24.23	1880000	24.23	-1.39347
1952-01-31	24.14	24.14	24.14	24.14	1810000	24.14	-0.372132
1952-02-01	24.3	24.3	24.3	24.3	1350000	24.3	0.660613
1952-02-04	24.12	24.12	24.12	24.12	1640000	24.12	-0.743498
1952-02-05	24.11	24.11	24.11	24.11	1590000	24.11	-0.041468
1952-02-06	24.18	24.18	24.18	24.18	1310000	24.18	0.289915
1952-02-07	24.11	24.11	24.11	24.11	1170000	24.11	-0.289915
1952-02-08	24.24	24.24	24.24	24.24	1350000	24.24	0.537747
1952-02-11	24.11	24.11	24.11	24.11	1140000	24.11	-0.537747
1952-02-13	23.92	23.92	23.92	23.92	1300000	23.92	-0.791176
1952-02-14	23.87	23.87	23.87	23.87	1340000	23.87	-0.209249
1952-02-15	23.86	23.86	23.86	23.86	1200000	23.86	-0.0419024
1952-02-18	23.74	23.74	23.74	23.74	1140000	23.74	-0.504203
1952-02-19	23.36	23.36	23.36	23.36	1630000	23.36	-1.61362
1952-02-20	23.09	23.09	23.09	23.09	1970000	23.09	-1.16255
1952-02-21	23.16	23.16	23.16	23.16	1360000	23.16	0.302703
1952-02-25	23.23	23.23	23.23	23.23	1200000	23.23	0.301789
1952-02-26	23.15	23.15	23.15	23.15	1080000	23.15	-0.344977
1952-02-27	23.18	23.18	23.18	23.18	1260000	23.18	0.129506
1952-02-28	23.29	23.29	23.29	23.29	1150000	23.29	0.473425
1952-02-29	23.26	23.26	23.26	23.26	1000000	23.26	-0.128894
1952-03-03	23.29	23.29	23.29	23.29	1020000	23.29	0.128894
1952-03-04	23.68	23.68	23.68	23.68	1570000	23.68	1.66067
1952-03-05	23.71	23.71	23.71	23.71	1380000	23.71	0.126609
1952-03-06	23.69	23.69	23.69	23.69	1210000	23.69	-0.0843882
1952-03-07	23.72	23.72	23.72	23.72	1410000	23.72	0.126556
1952-03-10	23.6	23.6	23.6	23.6	1170000	23.6	-0.507186
1952-03-11	23.62	23.62	23.62	23.62	1210000	23.62	0.0847099
1952-03-12	23.73	23.73	23.73	23.73	1310000	23.73	0.464626
1952-03-13	23.75	23.75	23.75	23.75	1270000	23.75	0.084246
1952-03-14	23.75	23.75	23.75	23.75	1350000	23.75	0
1952-03-17	23.92	23.92	23.92	23.92	1150000	23.92	0.71324
1952-03-18	23.87	23.87	23.87	23.87	1170000	23.87	-0.209249
1952-03-19	23.82	23.82	23.82	23.82	1090000	23.82	-0.209688
1952-03-20	23.89	23.89	23.89	23.89	1240000	23.89	0.29344
1952-03-21	23.93	23.93	23.93	23.93	1290000	23.93	0.167294
1952-03-24	23.93	23.93	23.93	23.93	1040000	23.93	0
1952-03-25	23.79	23.79	23.79	23.79	1060000	23.79	-0.586758
1952-03-26	23.78	23.78	23.78	23.78	1030000	23.78	-0.0420433
1952-03-27	23.99	23.99	23.99	23.99	1370000	23.99	0.879219
1952-03-28	24.18	24.18	24.18	24.18	1560000	24.18	0.788877
1952-03-31	24.37	24.37	24.37	24.37	1680000	24.37	0.782702
1952-04-01	24.18	24.18	24.18	24.18	1720000	24.18	-0.782702
1952-04-02	24.12	24.12	24.12	24.12	1260000	24.12	-0.248447
1952-04-03	24.12	24.12	24.12	24.12	1280000	24.12	0
1952-04-04	24.02	24.02	24.02	24.02	1190000	24.02	-0.415456
1952-04-07	23.8	23.8	23.8	23.8	1230000	23.8	-0.920124
1952-04-08	23.91	23.91	23.91	23.91	1090000	23.91	0.46112
1952-04-09	23.94	23.94	23.94	23.94	980000	23.94	0.125392
1952-04-10	24.11	24.11	24.11	24.11	1130000	24.11	0.707599
1952-04-14	23.95	23.95	23.95	23.95	1790000	23.95	-0.665837
1952-04-15	23.65	23.65	23.65	23.65	1720000	23.65	-1.26052
1952-04-16	23.58	23.58	23.58	23.58	1400000	23.58	-0.296422
1952-04-17	23.41	23.41	23.41	23.41	1620000	23.41	-0.723561
1952-04-18	23.5	23.5	23.5	23.5	1240000	23.5	0.383714
1952-04-21	23.69	23.69	23.69	23.69	1110000	23.69	0.80526
1952-04-22	23.58	23.58	23.58	23.58	1240000	23.58	-0.465412
1952-04-23	23.48	23.48	23.48	23.48	1090000	23.48	-0.42499
1952-04-24	23.43	23.43	23.43	23.43	1580000	23.43	-0.213174
1952-04-25	23.54	23.54	23.54	23.54	1240000	23.54	0.468385
1952-04-28	23.55	23.55	23.55	23.55	980000	23.55	0.0424719
1952-04-29	23.49	23.49	23.49	23.49	1170000	23.49	-0.255102
1952-04-30	23.32	23.32	23.32	23.32	1000000	23.32	-0.726344
1952-05-01	23.17	23.17	23.17	23.17	1400000	23.17	-0.645302
1952-05-02	23.56	23.56	23.56	23.56	1300000	23.56	1.6692
1952-05-05	23.66	23.66	23.66	23.66	860000	23.66	0.42355
1952-05-06	23.67	23.67	23.67	23.67	1120000	23.67	0.0422565
1952-05-07	23.81	23.81	23.81	23.81	1120000	23.81	0.589724
1952-05-08	23.86	23.86	23.86	23.86	1230000	23.86	0.209776
1952-05-09	23.84	23.84	23.84	23.84	960000	23.84	-0.0838574
1952-05-12	23.75	23.75	23.75	23.75	800000	23.75	-0.378231
1952-05-13	23.78	23.78	23.78	23.78	890000	23.78	0.126236
1952-05-14	23.68	23.68	23.68	23.68	950000	23.68	-0.421408
1952-05-15	23.6	23.6	23.6	23.6	1050000	23.6	-0.33841
1952-05-16	23.56	23.56	23.56	23.56	910000	23.56	-0.169635
1952-05-19	23.61	23.61	23.61	23.61	780000	23.61	0.211999
1952-05-20	23.74	23.74	23.74	23.74	1150000	23.74	0.549104
1952-05-21	23.78	23.78	23.78	23.78	1210000	23.78	0.16835
1952-05-22	23.91	23.91	23.91	23.91	1360000	23.91	0.545189
1952-05-23	23.89	23.89	23.89	23.89	1150000	23.89	-0.083682
1952-05-26	23.94	23.94	23.94	23.94	940000	23.94	0.209074
1952-05-27	23.88	23.88	23.88	23.88	1040000	23.88	-0.250941
1952-05-28	23.84	23.84	23.84	23.84	1130000	23.84	-0.167645
1952-05-29	23.86	23.86	23.86	23.86	1100000	23.86	0.0838574
1952-06-02	23.8	23.8	23.8	23.8	1190000	23.8	-0.251784
1952-06-03	23.78	23.78	23.78	23.78	940000	23.78	-0.0840689
1952-06-04	23.95	23.95	23.95	23.95	1200000	23.95	0.712343
1952-06-05	24.1	24.1	24.1	24.1	1410000	24.1	0.624352
1952-06-06	24.26	24.26	24.26	24.26	1520000	24.26	0.661706
1952-06-09	24.37	24.37	24.37	24.37	1270000	24.37	0.452396
1952-06-10	24.23	24.23	24.23	24.23	1220000	24.23	-0.576133
1952-06-11	24.31	24.31	24.31	24.31	1190000	24.31	0.329625
1952-06-12	24.31	24.31	24.31	24.31	1370000	24.31	0
1952-06-13	24.37	24.37	24.37	24.37	1130000	24.37	0.246508
1952-06-16	24.3	24.3	24.3	24.3	980000	24.3	-0.287652
1952-06-17	24.33	24.33	24.33	24.33	920000	24.33	0.123381
1952-06-18	24.43	24.43	24.43	24.43	1270000	24.43	0.410173
1952-06-19	24.51	24.51	24.51	24.51	1320000	24.51	0.326931
1952-06-20	24.59	24.59	24.59	24.59	1190000	24.59	0.325866
1952-06-23	24.56	24.56	24.56	24.56	1200000	24.56	-0.122075
1952-06-24	24.6	24.6	24.6	24.6	1200000	24.6	0.162734
1952-06-25	24.66	24.66	24.66	24.66	1230000	24.66	0.243605
1952-06-26	24.75	24.75	24.75	24.75	1190000	24.75	0.364299
1952-06-27	24.83	24.83	24.83	24.83	1210000	24.83	0.322711
1952-06-30	24.96	24.96	24.96	24.96	1380000	24.96	0.522194
1952-07-01	25.12	25.12	25.12	25.12	1450000	25.12	0.63898
1952-07-02	25.06	25.06	25.06	25.06	1320000	25.06	-0.239139
1952-07-03	25.05	25.05	25.05	25.05	1150000	25.05	-0.0399122
1952-07-07	24.97	24.97	24.97	24.97	1080000	24.97	-0.319872
1952-07-08	24.96	24.96	24.96	24.96	850000	24.96	-0.0400561
1952-07-09	24.86	24.86	24.86	24.86	1120000	24.86	-0.401446
1952-07-10	24.81	24.81	24.81	24.81	1010000	24.81	-0.201329
1952-07-11	24.98	24.98	24.98	24.98	1040000	24.98	0.682871
1952-07-14	25.03	25.03	25.03	25.03	1090000	25.03	0.19996
1952-07-15	25.16	25.16	25.16	25.16	1220000	25.16	0.518033
1952-07-16	25.16	25.16	25.16	25.16	1120000	25.16	0
1952-07-17	25.05	25.05	25.05	25.05	1010000	25.05	-0.43816
1952-07-18	24.85	24.85	24.85	24.85	1020000	24.85	-0.801607
1952-07-21	24.95	24.95	24.95	24.95	780000	24.95	0.401607
1952-07-22	25	25	25	25	910000	25	0.2002
1952-07-23	25.11	25.11	25.11	25.11	1020000	25.11	0.439035
1952-07-24	25.24	25.24	25.24	25.24	1270000	25.24	0.516386
1952-07-25	25.16	25.16	25.16	25.16	1130000	25.16	-0.317461
1952-07-28	25.2	25.2	25.2	25.2	1030000	25.2	0.158856
1952-07-29	25.26	25.26	25.26	25.26	1010000	25.26	0.237812
1952-07-30	25.37	25.37	25.37	25.37	1240000	25.37	0.434526
1952-07-31	25.4	25.4	25.4	25.4	1230000	25.4	0.11818
1952-08-01	25.45	25.45	25.45	25.45	1050000	25.45	0.196657
1952-08-04	25.43	25.43	25.43	25.43	950000	25.43	-0.0786164
1952-08-05	25.46	25.46	25.46	25.46	1050000	25.46	0.117901
1952-08-06	25.44	25.44	25.44	25.44	1140000	25.44	-0.0785855
1952-08-07	25.52	25.52	25.52	25.52	1180000	25.52	0.313972
1952-08-08	25.55	25.55	25.55	25.55	1170000	25.55	0.117486
1952-08-11	25.52	25.52	25.52	25.52	1160000	25.52	-0.117486
1952-08-12	25.31	25.31	25.31	25.31	1110000	25.31	-0.826288
1952-08-13	25.28	25.28	25.28	25.28	990000	25.28	-0.118601
1952-08-14	25.28	25.28	25.28	25.28	930000	25.28	0
1952-08-15	25.2	25.2	25.2	25.2	890000	25.2	-0.316957
1952-08-18	24.94	24.94	24.94	24.94	1090000	24.94	-1.03711
1952-08-19	24.89	24.89	24.89	24.89	980000	24.89	-0.200682
1952-08-20	24.95	24.95	24.95	24.95	960000	24.95	0.240771
1952-08-21	24.98	24.98	24.98	24.98	800000	24.98	0.120168
1952-08-22	24.99	24.99	24.99	24.99	910000	24.99	0.040024
1952-08-25	24.87	24.87	24.87	24.87	840000	24.87	-0.481349
1952-08-26	24.83	24.83	24.83	24.83	890000	24.83	-0.160966
1952-08-27	24.94	24.94	24.94	24.94	930000	24.94	0.442034
1952-08-28	24.97	24.97	24.97	24.97	980000	24.97	0.120216
1952-08-29	25.03	25.03	25.03	25.03	890000	25.03	0.24
1952-09-02	25.15	25.15	25.15	25.15	970000	25.15	0.478279
1952-09-03	25.25	25.25	25.25	25.25	1200000	25.25	0.396826
1952-09-04	25.24	25.24	25.24	25.24	1120000	25.24	-0.0396118
1952-09-05	25.21	25.21	25.21	25.21	1040000	25.21	-0.11893
1952-09-08	25.11	25.11	25.11	25.11	1170000	25.11	-0.397457
1952-09-09	24.86	24.86	24.86	24.86	1310000	24.86	-1.00061
1952-09-10	24.69	24.69	24.69	24.69	1590000	24.69	-0.686178
1952-09-11	24.72	24.72	24.72	24.72	970000	24.72	0.121433
1952-09-12	24.71	24.71	24.71	24.71	1040000	24.71	-0.0404613
1952-09-15	24.45	24.45	24.45	24.45	1100000	24.45	-1.05778
1952-09-16	24.53	24.53	24.53	24.53	1140000	24.53	0.326664
1952-09-17	24.58	24.58	24.58	24.58	1000000	24.58	0.203625
1952-09-18	24.51	24.51	24.51	24.51	1030000	24.51	-0.285191
1952-09-19	24.57	24.57	24.57	24.57	1150000	24.57	0.244499
1952-09-22	24.59	24.59	24.59	24.59	1160000	24.59	0.081367
1952-09-23	24.7	24.7	24.7	24.7	1240000	24.7	0.446339
1952-09-24	24.79	24.79	24.79	24.79	1390000	24.79	0.36371
1952-09-25	24.81	24.81	24.81	24.81	1210000	24.81	0.0806452
1952-09-26	24.73	24.73	24.73	24.73	1180000	24.73	-0.322972
1952-09-29	24.68	24.68	24.68	24.68	970000	24.68	-0.202388
1952-09-30	24.54	24.54	24.54	24.54	1120000	24.54	-0.568876
1952-10-01	24.48	24.48	24.48	24.48	1060000	24.48	-0.244798
1952-10-02	24.52	24.52	24.52	24.52	1040000	24.52	0.163265
1952-10-03	24.5	24.5	24.5	24.5	980000	24.5	-0.0815994
1952-10-06	24.44	24.44	24.44	24.44	1070000	24.44	-0.245198
1952-10-07	24.4	24.4	24.4	24.4	950000	24.4	-0.1638
1952-10-08	24.58	24.58	24.58	24.58	1260000	24.58	0.734997
1952-10-09	24.57	24.57	24.57	24.57	1090000	24.57	-0.0406918
1952-10-10	24.55	24.55	24.55	24.55	1070000	24.55	-0.0814332
1952-10-14	24.48	24.48	24.48	24.48	1130000	24.48	-0.28554
1952-10-15	24.06	24.06	24.06	24.06	1730000	24.06	-1.73057
1952-10-16	23.91	23.91	23.91	23.91	1730000	23.91	-0.625393
1952-10-17	24.2	24.2	24.2	24.2	1360000	24.2	1.20559
1952-10-20	24.13	24.13	24.13	24.13	1050000	24.13	-0.289675
1952-10-21	24.07	24.07	24.07	24.07	990000	24.07	-0.248963
1952-10-22	23.8	23.8	23.8	23.8	1160000	23.8	-1.12807
1952-10-23	23.87	23.87	23.87	23.87	1260000	23.87	0.293686
1952-10-24	24.03	24.03	24.03	24.03	1060000	24.03	0.668061
1952-10-27	24.09	24.09	24.09	24.09	1000000	24.09	0.249377
1952-10-28	24.13	24.13	24.13	24.13	1080000	24.13	0.165906
1952-10-29	24.15	24.15	24.15	24.15	1020000	24.15	0.08285
1952-10-30	24.15	24.15	24.15	24.15	1090000	24.15	0
1952-10-31	24.52	24.52	24.52	24.52	1760000	24.52	1.52047
1952-11-03	24.6	24.6	24.6	24.6	1670000	24.6	0.325733
1952-11-05	24.67	24.67	24.67	24.67	2030000	24.67	0.284149
1952-11-06	24.77	24.77	24.77	24.77	1390000	24.77	0.404531
1952-11-07	24.78	24.78	24.78	24.78	1540000	24.78	0.0403633
1952-11-10	24.77	24.77	24.77	24.77	1360000	24.77	-0.0403633
1952-11-12	24.65	24.65	24.65	24.65	1490000	24.65	-0.485634
1952-11-13	24.71	24.71	24.71	24.71	1330000	24.71	0.243112
1952-11-14	24.75	24.75	24.75	24.75	1700000	24.75	0.161747
1952-11-17	24.8	24.8	24.8	24.8	1490000	24.8	0.201816
1952-11-18	25.16	25.16	25.16	25.16	2250000	25.16	1.44118
1952-11-19	25.33	25.33	25.33	25.33	2350000	25.33	0.673403
1952-11-20	25.28	25.28	25.28	25.28	1740000	25.28	-0.197589
1952-11-21	25.27	25.27	25.27	25.27	1760000	25.27	-0.0395648
1952-11-24	25.42	25.42	25.42	25.42	2100000	25.42	0.591834
1952-11-25	25.36	25.36	25.36	25.36	1930000	25.36	-0.236314
1952-11-26	25.52	25.52	25.52	25.52	1920000	25.52	0.628933
1952-11-28	25.66	25.66	25.66	25.66	2160000	25.66	0.54709
1952-12-01	25.68	25.68	25.68	25.68	2100000	25.68	0.077912
1952-12-02	25.74	25.74	25.74	25.74	1610000	25.74	0.233372
1952-12-03	25.71	25.71	25.71	25.71	1610000	25.71	-0.116618
1952-12-04	25.61	25.61	25.61	25.61	1570000	25.61	-0.389712
1952-12-05	25.62	25.62	25.62	25.62	1510000	25.62	0.0390396
1952-12-08	25.76	25.76	25.76	25.76	1790000	25.76	0.54496
1952-12-09	25.93	25.93	25.93	25.93	2120000	25.93	0.65777
1952-12-10	25.98	25.98	25.98	25.98	1880000	25.98	0.192641
1952-12-11	25.96	25.96	25.96	25.96	1790000	25.96	-0.0770119
1952-12-12	26.04	26.04	26.04	26.04	2030000	26.04	0.307693
1952-12-15	26.04	26.04	26.04	26.04	1940000	26.04	0
1952-12-16	26.07	26.07	26.07	26.07	1980000	26.07	0.115141
1952-12-17	26.04	26.04	26.04	26.04	1700000	26.04	-0.115141
1952-12-18	26.03	26.03	26.03	26.03	1860000	26.03	-0.0384098
1952-12-19	26.15	26.15	26.15	26.15	2050000	26.15	0.459947
1952-12-22	26.3	26.3	26.3	26.3	2100000	26.3	0.571975
1952-12-23	26.19	26.19	26.19	26.19	2100000	26.19	-0.419128
1952-12-24	26.21	26.21	26.21	26.21	1510000	26.21	0.0763359
1952-12-26	26.25	26.25	26.25	26.25	1290000	26.25	0.152497
1952-12-29	26.4	26.4	26.4	26.4	1820000	26.4	0.569802
1952-12-30	26.59	26.59	26.59	26.59	2070000	26.59	0.71712
1952-12-31	26.57	26.57	26.57	26.57	2050000	26.57	-0.0752445
1953-01-02	26.54	26.54	26.54	26.54	1450000	26.54	-0.112973
1953-01-05	26.66	26.66	26.66	26.66	2130000	26.66	0.451129
1953-01-06	26.48	26.48	26.48	26.48	2080000	26.48	-0.677458
1953-01-07	26.37	26.37	26.37	26.37	1760000	26.37	-0.416273
1953-01-08	26.33	26.33	26.33	26.33	1780000	26.33	-0.151803
1953-01-09	26.08	26.08	26.08	26.08	2080000	26.08	-0.954024
1953-01-12	25.86	25.86	25.86	25.86	1500000	25.86	-0.847136
1953-01-13	26.02	26.02	26.02	26.02	1680000	26.02	0.61681
1953-01-14	26.08	26.08	26.08	26.08	1370000	26.08	0.230326
1953-01-15	26.13	26.13	26.13	26.13	1450000	26.13	0.191534
1953-01-16	26.02	26.02	26.02	26.02	1710000	26.02	-0.421861
1953-01-19	26.01	26.01	26.01	26.01	1360000	26.01	-0.0384394
1953-01-20	26.14	26.14	26.14	26.14	1490000	26.14	0.498563
1953-01-21	26.09	26.09	26.09	26.09	1300000	26.09	-0.191461
1953-01-22	26.12	26.12	26.12	26.12	1380000	26.12	0.114921
1953-01-23	26.07	26.07	26.07	26.07	1340000	26.07	-0.191608
1953-01-26	26.02	26.02	26.02	26.02	1420000	26.02	-0.191975
1953-01-27	26.05	26.05	26.05	26.05	1550000	26.05	0.11523
1953-01-28	26.13	26.13	26.13	26.13	1640000	26.13	0.306631
1953-01-29	26.2	26.2	26.2	26.2	1830000	26.2	0.267533
1953-01-30	26.38	26.38	26.38	26.38	1760000	26.38	0.684674
1953-02-02	26.51	26.51	26.51	26.51	1890000	26.51	0.491587
1953-02-03	26.54	26.54	26.54	26.54	1560000	26.54	0.113101
1953-02-04	26.42	26.42	26.42	26.42	1660000	26.42	-0.453173
1953-02-05	26.15	26.15	26.15	26.15	1900000	26.15	-1.02721
1953-02-06	26.51	26.51	26.51	26.51	1870000	26.51	1.36728
1953-02-09	25.69	25.69	25.69	25.69	1780000	25.69	-3.14202
1953-02-10	25.62	25.62	25.62	25.62	1350000	25.62	-0.272851
1953-02-11	25.64	25.64	25.64	25.64	1240000	25.64	0.0780336
1953-02-13	25.74	25.74	25.74	25.74	1350000	25.74	0.389257
1953-02-16	25.65	25.65	25.65	25.65	1330000	25.65	-0.350263
1953-02-17	25.5	25.5	25.5	25.5	1290000	25.5	-0.586512
1953-02-18	25.48	25.48	25.48	25.48	1220000	25.48	-0.0784621
1953-02-19	25.57	25.57	25.57	25.57	1390000	25.57	0.352596
1953-02-20	25.63	25.63	25.63	25.63	1400000	25.63	0.234375
1953-02-24	25.75	25.75	25.75	25.75	2300000	25.75	0.467109
1953-02-25	25.91	25.91	25.91	25.91	2360000	25.91	0.619437
1953-02-26	25.95	25.95	25.95	25.95	2290000	25.95	0.154262
1953-02-27	25.9	25.9	25.9	25.9	1990000	25.9	-0.192864
1953-03-02	25.93	25.93	25.93	25.93	1760000	25.93	0.115763
1953-03-03	26	26	26	26	1850000	26	0.269594
1953-03-04	25.78	25.78	25.78	25.78	2010000	25.78	-0.849754
1953-03-05	25.79	25.79	25.79	25.79	1540000	25.79	0.0387822
1953-03-06	25.84	25.84	25.84	25.84	1690000	25.84	0.193686
1953-03-09	25.83	25.83	25.83	25.83	1600000	25.83	-0.0387072
1953-03-10	25.91	25.91	25.91	25.91	1530000	25.91	0.309239
1953-03-11	26.12	26.12	26.12	26.12	1890000	26.12	0.807231
1953-03-12	26.13	26.13	26.13	26.13	1780000	26.13	0.0382775
1953-03-13	26.18	26.18	26.18	26.18	1760000	26.18	0.191168
1953-03-16	26.22	26.22	26.22	26.22	1770000	26.22	0.152672
1953-03-17	26.33	26.33	26.33	26.33	2110000	26.33	0.41865
1953-03-18	26.24	26.24	26.24	26.24	2110000	26.24	-0.342401
1953-03-19	26.22	26.22	26.22	26.22	1840000	26.22	-0.0762486
1953-03-20	26.18	26.18	26.18	26.18	1730000	26.18	-0.152672
1953-03-23	26.02	26.02	26.02	26.02	1750000	26.02	-0.613029
1953-03-24	26.17	26.17	26.17	26.17	1970000	26.17	0.574824
1953-03-25	26.1	26.1	26.1	26.1	2320000	26.1	-0.26784
1953-03-26	25.95	25.95	25.95	25.95	2000000	25.95	-0.57637
1953-03-27	25.99	25.99	25.99	25.99	1640000	25.99	0.154024
1953-03-30	25.61	25.61	25.61	25.61	2740000	25.61	-1.47289
1953-03-31	25.29	25.29	25.29	25.29	3120000	25.29	-1.25738
1953-04-01	25.25	25.25	25.25	25.25	2240000	25.25	-0.15829
1953-04-02	25.23	25.23	25.23	25.23	1720000	25.23	-0.0792393
1953-04-06	24.61	24.61	24.61	24.61	3050000	24.61	-2.48809
1953-04-07	24.71	24.71	24.71	24.71	2500000	24.71	0.405516
1953-04-08	24.93	24.93	24.93	24.93	1860000	24.93	0.886388
1953-04-09	24.88	24.88	24.88	24.88	1520000	24.88	-0.200763
1953-04-10	24.82	24.82	24.82	24.82	1360000	24.82	-0.241449
1953-04-13	24.77	24.77	24.77	24.77	1280000	24.77	-0.201654
1953-04-14	24.86	24.86	24.86	24.86	1480000	24.86	0.362684
1953-04-15	24.96	24.96	24.96	24.96	1580000	24.96	0.401446
1953-04-16	24.91	24.91	24.91	24.91	1310000	24.91	-0.200521
1953-04-17	24.62	24.62	24.62	24.62	1430000	24.62	-1.17102
1953-04-20	24.73	24.73	24.73	24.73	1520000	24.73	0.445796
1953-04-21	24.67	24.67	24.67	24.67	1250000	24.67	-0.242915
1953-04-22	24.46	24.46	24.46	24.46	1390000	24.46	-0.85488
1953-04-23	24.19	24.19	24.19	24.19	1920000	24.19	-1.10998
1953-04-24	24.2	24.2	24.2	24.2	1780000	24.2	0.0413309
1953-04-27	24.34	24.34	24.34	24.34	1400000	24.34	0.576845
1953-04-28	24.52	24.52	24.52	24.52	1330000	24.52	0.736802
1953-04-29	24.68	24.68	24.68	24.68	1310000	24.68	0.650409
1953-04-30	24.62	24.62	24.62	24.62	1140000	24.62	-0.243408
1953-05-01	24.73	24.73	24.73	24.73	1200000	24.73	0.445796
1953-05-04	25	25	25	25	1520000	25	1.08587
1953-05-05	25.03	25.03	25.03	25.03	1290000	25.03	0.119928
1953-05-06	25	25	25	25	1110000	25	-0.119928
1953-05-07	24.9	24.9	24.9	24.9	1110000	24.9	-0.400802
1953-05-08	24.9	24.9	24.9	24.9	1220000	24.9	0
1953-05-11	24.91	24.91	24.91	24.91	1010000	24.91	0.0401526
1953-05-12	24.74	24.74	24.74	24.74	1080000	24.74	-0.684796
1953-05-13	24.71	24.71	24.71	24.71	1120000	24.71	-0.121335
1953-05-14	24.85	24.85	24.85	24.85	1210000	24.85	0.564973
1953-05-15	24.84	24.84	24.84	24.84	1200000	24.84	-0.0402495
1953-05-18	24.75	24.75	24.75	24.75	1080000	24.75	-0.362977
1953-05-19	24.7	24.7	24.7	24.7	1120000	24.7	-0.202225
1953-05-20	24.93	24.93	24.93	24.93	1690000	24.93	0.926865
1953-05-21	25.06	25.06	25.06	25.06	1590000	25.06	0.520105
1953-05-22	25.03	25.03	25.03	25.03	1350000	25.03	-0.119784
1953-05-25	24.99	24.99	24.99	24.99	1180000	24.99	-0.159936
1953-05-26	24.87	24.87	24.87	24.87	1160000	24.87	-0.481349
1953-05-27	24.64	24.64	24.64	24.64	1330000	24.64	-0.929112
1953-05-28	24.46	24.46	24.46	24.46	1240000	24.46	-0.733201
1953-05-29	24.54	24.54	24.54	24.54	920000	24.54	0.326531
1953-06-01	24.15	24.15	24.15	24.15	1490000	24.15	-1.60201
1953-06-02	24.22	24.22	24.22	24.22	1450000	24.22	0.289436
1953-06-03	24.18	24.18	24.18	24.18	1050000	24.18	-0.165289
1953-06-04	24.03	24.03	24.03	24.03	1400000	24.03	-0.62228
1953-06-05	24.09	24.09	24.09	24.09	1160000	24.09	0.249377
1953-06-08	24.01	24.01	24.01	24.01	1000000	24.01	-0.332641
1953-06-09	23.6	23.6	23.6	23.6	2200000	23.6	-1.72237
1953-06-10	23.54	23.54	23.54	23.54	1960000	23.54	-0.254561
1953-06-11	23.75	23.75	23.75	23.75	1220000	23.75	0.888143
1953-06-12	23.82	23.82	23.82	23.82	920000	23.82	0.294303
1953-06-15	23.62	23.62	23.62	23.62	1090000	23.62	-0.843175
1953-06-16	23.55	23.55	23.55	23.55	1370000	23.55	-0.296799
1953-06-17	23.85	23.85	23.85	23.85	1150000	23.85	1.26584
1953-06-18	23.84	23.84	23.84	23.84	1010000	23.84	-0.0419375
1953-06-19	23.84	23.84	23.84	23.84	890000	23.84	0
1953-06-22	23.96	23.96	23.96	23.96	1030000	23.96	0.502093
1953-06-23	24.12	24.12	24.12	24.12	1050000	24.12	0.66556
1953-06-24	24.09	24.09	24.09	24.09	1030000	24.09	-0.124456
1953-06-25	24.19	24.19	24.19	24.19	1160000	24.19	0.414251
1953-06-26	24.21	24.21	24.21	24.21	830000	24.21	0.0826446
1953-06-29	24.14	24.14	24.14	24.14	800000	24.14	-0.289556
1953-06-30	24.14	24.14	24.14	24.14	820000	24.14	0
1953-07-01	24.24	24.24	24.24	24.24	910000	24.24	0.413395
1953-07-02	24.31	24.31	24.31	24.31	1030000	24.31	0.288363
1953-07-03	24.36	24.36	24.36	24.36	830000	24.36	0.205465
1953-07-06	24.38	24.38	24.38	24.38	820000	24.38	0.0820681
1953-07-07	24.51	24.51	24.51	24.51	1030000	24.51	0.531807
1953-07-08	24.5	24.5	24.5	24.5	950000	24.5	-0.040808
1953-07-09	24.43	24.43	24.43	24.43	910000	24.43	-0.286123
1953-07-10	24.41	24.41	24.41	24.41	860000	24.41	-0.0819001
1953-07-13	24.17	24.17	24.17	24.17	1120000	24.17	-0.988069
1953-07-14	24.08	24.08	24.08	24.08	1030000	24.08	-0.373057
1953-07-15	24.15	24.15	24.15	24.15	840000	24.15	0.290276
1953-07-16	24.18	24.18	24.18	24.18	790000	24.18	0.124147
1953-07-17	24.35	24.35	24.35	24.35	840000	24.35	0.7006
1953-07-20	24.22	24.22	24.22	24.22	830000	24.22	-0.535311
1953-07-21	24.16	24.16	24.16	24.16	850000	24.16	-0.248037
1953-07-22	24.19	24.19	24.19	24.19	900000	24.19	0.124095
1953-07-23	24.23	24.23	24.23	24.23	1000000	24.23	0.165221
1953-07-24	24.23	24.23	24.23	24.23	890000	24.23	0
1953-07-27	24.07	24.07	24.07	24.07	1210000	24.07	-0.662528
1953-07-28	24.11	24.11	24.11	24.11	1080000	24.11	0.166044
1953-07-29	24.26	24.26	24.26	24.26	1000000	24.26	0.620221
1953-07-30	24.49	24.49	24.49	24.49	1200000	24.49	0.943597
1953-07-31	24.75	24.75	24.75	24.75	1320000	24.75	1.05606
1953-08-03	24.84	24.84	24.84	24.84	1160000	24.84	0.362977
1953-08-04	24.78	24.78	24.78	24.78	1000000	24.78	-0.241838
1953-08-05	24.68	24.68	24.68	24.68	1080000	24.68	-0.404368
1953-08-06	24.8	24.8	24.8	24.8	1200000	24.8	0.485045
1953-08-07	24.78	24.78	24.78	24.78	950000	24.78	-0.0806777
1953-08-10	24.75	24.75	24.75	24.75	1090000	24.75	-0.121139
1953-08-11	24.72	24.72	24.72	24.72	940000	24.72	-0.121286
1953-08-12	24.78	24.78	24.78	24.78	990000	24.78	0.242424
1953-08-13	24.73	24.73	24.73	24.73	1040000	24.73	-0.201979
1953-08-14	24.62	24.62	24.62	24.62	1000000	24.62	-0.445796
1953-08-17	24.56	24.56	24.56	24.56	910000	24.56	-0.244002
1953-08-18	24.46	24.46	24.46	24.46	1030000	24.46	-0.407997
1953-08-19	24.31	24.31	24.31	24.31	1400000	24.31	-0.615134
1953-08-20	24.29	24.29	24.29	24.29	860000	24.29	-0.0823045
1953-08-21	24.35	24.35	24.35	24.35	850000	24.35	0.246711
1953-08-24	24.09	24.09	24.09	24.09	1320000	24.09	-1.0735
1953-08-25	23.93	23.93	23.93	23.93	1470000	23.93	-0.666391
1953-08-26	23.86	23.86	23.86	23.86	1060000	23.86	-0.292949
1953-08-27	23.79	23.79	23.79	23.79	1290000	23.79	-0.293809
1953-08-28	23.74	23.74	23.74	23.74	1060000	23.74	-0.210394
1953-08-31	23.32	23.32	23.32	23.32	2190000	23.32	-1.785
1953-09-01	23.42	23.42	23.42	23.42	1580000	23.42	0.4279
1953-09-02	23.56	23.56	23.56	23.56	1110000	23.56	0.596
1953-09-03	23.51	23.51	23.51	23.51	900000	23.51	-0.21245
1953-09-04	23.57	23.57	23.57	23.57	770000	23.57	0.254885
1953-09-08	23.61	23.61	23.61	23.61	740000	23.61	0.169563
1953-09-09	23.65	23.65	23.65	23.65	860000	23.65	0.169276
1953-09-10	23.41	23.41	23.41	23.41	1010000	23.41	-1.01998
1953-09-11	23.14	23.14	23.14	23.14	1930000	23.14	-1.16006
1953-09-14	22.71	22.71	22.71	22.71	2550000	22.71	-1.87574
1953-09-15	22.9	22.9	22.9	22.9	2850000	22.9	0.833155
1953-09-16	23.01	23.01	23.01	23.01	1570000	23.01	0.479199
1953-09-17	23.07	23.07	23.07	23.07	1290000	23.07	0.260417
1953-09-18	22.95	22.95	22.95	22.95	1190000	22.95	-0.521514
1953-09-21	22.88	22.88	22.88	22.88	1070000	22.88	-0.305477
1953-09-22	23.2	23.2	23.2	23.2	1300000	23.2	1.38891
1953-09-23	23.23	23.23	23.23	23.23	1240000	23.23	0.129227
1953-09-24	23.24	23.24	23.24	23.24	1020000	23.24	0.0430385
1953-09-25	23.3	23.3	23.3	23.3	910000	23.3	0.257843
1953-09-28	23.45	23.45	23.45	23.45	1150000	23.45	0.641713
1953-09-29	23.49	23.49	23.49	23.49	1170000	23.49	0.17043
1953-09-30	23.35	23.35	23.35	23.35	940000	23.35	-0.597781
1953-10-01	23.49	23.49	23.49	23.49	940000	23.49	0.597781
1953-10-02	23.59	23.59	23.59	23.59	890000	23.59	0.424809
1953-10-05	23.48	23.48	23.48	23.48	930000	23.48	-0.46739
1953-10-06	23.39	23.39	23.39	23.39	1100000	23.39	-0.384041
1953-10-07	23.58	23.58	23.58	23.58	1010000	23.58	0.809031
1953-10-08	23.62	23.62	23.62	23.62	960000	23.62	0.169492
1953-10-09	23.66	23.66	23.66	23.66	900000	23.66	0.169205
1953-10-13	23.57	23.57	23.57	23.57	1130000	23.57	-0.381114
1953-10-14	23.68	23.68	23.68	23.68	1290000	23.68	0.465609
1953-10-15	23.95	23.95	23.95	23.95	1710000	23.95	1.13375
1953-10-16	24.14	24.14	24.14	24.14	1620000	24.14	0.790189
1953-10-19	24.16	24.16	24.16	24.16	1190000	24.16	0.0828157
1953-10-20	24.17	24.17	24.17	24.17	1280000	24.17	0.0413822
1953-10-21	24.19	24.19	24.19	24.19	1320000	24.19	0.082713
1953-10-22	24.3	24.3	24.3	24.3	1330000	24.3	0.453703
1953-10-23	24.35	24.35	24.35	24.35	1330000	24.35	0.20555
1953-10-26	24.31	24.31	24.31	24.31	1340000	24.31	-0.164406
1953-10-27	24.26	24.26	24.26	24.26	1170000	24.26	-0.205888
1953-10-28	24.29	24.29	24.29	24.29	1260000	24.29	0.123584
1953-10-29	24.58	24.58	24.58	24.58	1610000	24.58	1.18684
1953-10-30	24.54	24.54	24.54	24.54	1400000	24.54	-0.162866
1953-11-02	24.66	24.66	24.66	24.66	1340000	24.66	0.487806
1953-11-04	24.51	24.51	24.51	24.51	1480000	24.51	-0.61013
1953-11-05	24.64	24.64	24.64	24.64	1720000	24.64	0.528994
1953-11-06	24.61	24.61	24.61	24.61	1700000	24.61	-0.121827
1953-11-09	24.66	24.66	24.66	24.66	1440000	24.66	0.202963
1953-11-10	24.37	24.37	24.37	24.37	1340000	24.37	-1.18296
1953-11-12	24.46	24.46	24.46	24.46	1390000	24.46	0.368626
1953-11-13	24.54	24.54	24.54	24.54	1540000	24.54	0.326531
1953-11-16	24.38	24.38	24.38	24.38	1490000	24.38	-0.654132
1953-11-17	24.25	24.25	24.25	24.25	1250000	24.25	-0.534651
1953-11-18	24.29	24.29	24.29	24.29	1250000	24.29	0.164813
1953-11-19	24.4	24.4	24.4	24.4	1420000	24.4	0.451839
1953-11-20	24.44	24.44	24.44	24.44	1300000	24.44	0.1638
1953-11-23	24.36	24.36	24.36	24.36	1410000	24.36	-0.327869
1953-11-24	24.5	24.5	24.5	24.5	1470000	24.5	0.573067
1953-11-25	24.52	24.52	24.52	24.52	1540000	24.52	0.0815994
1953-11-27	24.66	24.66	24.66	24.66	1600000	24.66	0.569339
1953-11-30	24.76	24.76	24.76	24.76	1960000	24.76	0.404695
1953-12-01	24.78	24.78	24.78	24.78	1580000	24.78	0.0807428
1953-12-02	24.95	24.95	24.95	24.95	1850000	24.95	0.683695
1953-12-03	24.97	24.97	24.97	24.97	1740000	24.97	0.0801282
1953-12-04	24.98	24.98	24.98	24.98	1390000	24.98	0.04004
1953-12-07	24.95	24.95	24.95	24.95	1410000	24.95	-0.120168
1953-12-08	24.87	24.87	24.87	24.87	1390000	24.87	-0.321156
1953-12-09	24.84	24.84	24.84	24.84	1410000	24.84	-0.1207
1953-12-10	24.78	24.78	24.78	24.78	1420000	24.78	-0.241838
1953-12-11	24.76	24.76	24.76	24.76	1440000	24.76	-0.0807428
1953-12-14	24.69	24.69	24.69	24.69	1540000	24.69	-0.283114
1953-12-15	24.71	24.71	24.71	24.71	1450000	24.71	0.0809717
1953-12-16	24.96	24.96	24.96	24.96	1880000	24.96	1.00665
1953-12-17	24.94	24.94	24.94	24.94	1600000	24.94	-0.0801603
1953-12-18	24.99	24.99	24.99	24.99	1550000	24.99	0.20028
1953-12-21	24.95	24.95	24.95	24.95	1690000	24.95	-0.160192
1953-12-22	24.76	24.76	24.76	24.76	1720000	24.76	-0.764437
1953-12-23	24.69	24.69	24.69	24.69	1570000	24.69	-0.283114
1953-12-24	24.8	24.8	24.8	24.8	1270000	24.8	0.444535
1953-12-28	24.71	24.71	24.71	24.71	1570000	24.71	-0.363563
1953-12-29	24.55	24.55	24.55	24.55	2140000	24.55	-0.649617
1953-12-30	24.76	24.76	24.76	24.76	2050000	24.76	0.851759
1953-12-31	24.81	24.81	24.81	24.81	2490000	24.81	0.201735
1954-01-04	24.95	24.95	24.95	24.95	1310000	24.95	0.562702
1954-01-05	25.1	25.1	25.1	25.1	1520000	25.1	0.599402
1954-01-06	25.14	25.14	25.14	25.14	1460000	25.14	0.159236
1954-01-07	25.06	25.06	25.06	25.06	1540000	25.06	-0.318725
1954-01-08	24.93	24.93	24.93	24.93	1260000	24.93	-0.520105
1954-01-11	24.8	24.8	24.8	24.8	1220000	24.8	-0.522824
1954-01-12	24.93	24.93	24.93	24.93	1250000	24.93	0.522824
1954-01-13	25.07	25.07	25.07	25.07	1420000	25.07	0.560001
1954-01-14	25.19	25.19	25.19	25.19	1530000	25.19	0.477518
1954-01-15	25.43	25.43	25.43	25.43	2180000	25.43	0.948249
1954-01-18	25.43	25.43	25.43	25.43	1580000	25.43	0
1954-01-19	25.68	25.68	25.68	25.68	1840000	25.68	0.97829
1954-01-20	25.75	25.75	25.75	25.75	1960000	25.75	0.272215
1954-01-21	25.79	25.79	25.79	25.79	1780000	25.79	0.155219
1954-01-22	25.85	25.85	25.85	25.85	1890000	25.85	0.232378
1954-01-25	25.93	25.93	25.93	25.93	1860000	25.93	0.309
1954-01-26	26.09	26.09	26.09	26.09	2120000	26.09	0.61515
1954-01-27	26.01	26.01	26.01	26.01	2020000	26.01	-0.307102
1954-01-28	26.02	26.02	26.02	26.02	1730000	26.02	0.0384394
1954-01-29	26.08	26.08	26.08	26.08	1950000	26.08	0.230326
1954-02-01	25.99	25.99	25.99	25.99	1740000	25.99	-0.345689
1954-02-02	25.92	25.92	25.92	25.92	1420000	25.92	-0.269698
1954-02-03	26.01	26.01	26.01	26.01	1690000	26.01	0.346621
1954-02-04	26.2	26.2	26.2	26.2	2040000	26.2	0.727833
1954-02-05	26.3	26.3	26.3	26.3	2030000	26.3	0.380953
1954-02-08	26.23	26.23	26.23	26.23	2180000	26.23	-0.266515
1954-02-09	26.17	26.17	26.17	26.17	1880000	26.17	-0.229008
1954-02-10	26.14	26.14	26.14	26.14	1790000	26.14	-0.114701
1954-02-11	26.06	26.06	26.06	26.06	1860000	26.06	-0.306514
1954-02-12	26.12	26.12	26.12	26.12	1730000	26.12	0.229973
1954-02-15	26.04	26.04	26.04	26.04	2080000	26.04	-0.306749
1954-02-16	25.81	25.81	25.81	25.81	1870000	25.81	-0.88718
1954-02-17	25.86	25.86	25.86	25.86	1740000	25.86	0.193536
1954-02-18	25.86	25.86	25.86	25.86	1500000	25.86	0
1954-02-19	25.92	25.92	25.92	25.92	1510000	25.92	0.23175
1954-02-23	25.83	25.83	25.83	25.83	1470000	25.83	-0.347826
1954-02-24	25.83	25.83	25.83	25.83	1350000	25.83	0
1954-02-25	25.91	25.91	25.91	25.91	1470000	25.91	0.309239
1954-02-26	26.15	26.15	26.15	26.15	1910000	26.15	0.92202
1954-03-01	26.25	26.25	26.25	26.25	2040000	26.25	0.38168
1954-03-02	26.32	26.32	26.32	26.32	1980000	26.32	0.266312
1954-03-03	26.32	26.32	26.32	26.32	2240000	26.32	0
1954-03-04	26.41	26.41	26.41	26.41	1830000	26.41	0.341362
1954-03-05	26.52	26.52	26.52	26.52	2030000	26.52	0.415644
1954-03-08	26.45	26.45	26.45	26.45	1650000	26.45	-0.264301
1954-03-09	26.51	26.51	26.51	26.51	1630000	26.51	0.226586
1954-03-10	26.57	26.57	26.57	26.57	1870000	26.57	0.226074
1954-03-11	26.69	26.69	26.69	26.69	2050000	26.69	0.45062
1954-03-12	26.69	26.69	26.69	26.69	1980000	26.69	0
1954-03-15	26.57	26.57	26.57	26.57	1680000	26.57	-0.45062
1954-03-16	26.56	26.56	26.56	26.56	1540000	26.56	-0.0376435
1954-03-17	26.62	26.62	26.62	26.62	1740000	26.62	0.225649
1954-03-18	26.73	26.73	26.73	26.73	2020000	26.73	0.412372
1954-03-19	26.81	26.81	26.81	26.81	1930000	26.81	0.298842
1954-03-22	26.79	26.79	26.79	26.79	1800000	26.79	-0.0746269
1954-03-23	26.6	26.6	26.6	26.6	2180000	26.6	-0.711747
1954-03-24	26.47	26.47	26.47	26.47	1900000	26.47	-0.48992
1954-03-25	26.42	26.42	26.42	26.42	1720000	26.42	-0.189072
1954-03-26	26.56	26.56	26.56	26.56	1550000	26.56	0.528503
1954-03-29	26.66	26.66	26.66	26.66	1870000	26.66	0.375799
1954-03-30	26.69	26.69	26.69	26.69	2130000	26.69	0.112465
1954-03-31	26.94	26.94	26.94	26.94	2690000	26.94	0.932321
1954-04-01	27.17	27.17	27.17	27.17	2270000	27.17	0.850125
1954-04-02	27.21	27.21	27.21	27.21	1830000	27.21	0.147113
1954-04-05	27.26	27.26	27.26	27.26	1710000	27.26	0.183587
1954-04-06	27.01	27.01	27.01	27.01	2120000	27.01	-0.921326
1954-04-07	27.11	27.11	27.11	27.11	1830000	27.11	0.36955
1954-04-08	27.38	27.38	27.38	27.38	2300000	27.38	0.991016
1954-04-09	27.38	27.38	27.38	27.38	2360000	27.38	0
1954-04-12	27.57	27.57	27.57	27.57	1790000	27.57	0.691541
1954-04-13	27.64	27.64	27.64	27.64	2020000	27.64	0.253577
1954-04-14	27.85	27.85	27.85	27.85	2330000	27.85	0.756897
1954-04-15	27.94	27.94	27.94	27.94	2200000	27.94	0.322639
1954-04-19	27.76	27.76	27.76	27.76	2430000	27.76	-0.646322
1954-04-20	27.75	27.75	27.75	27.75	1860000	27.75	-0.0360295
1954-04-21	27.64	27.64	27.64	27.64	1870000	27.64	-0.397184
1954-04-22	27.68	27.68	27.68	27.68	1750000	27.68	0.144613
1954-04-23	27.78	27.78	27.78	27.78	1990000	27.78	0.360621
1954-04-26	27.88	27.88	27.88	27.88	2150000	27.88	0.359325
1954-04-27	27.71	27.71	27.71	27.71	1970000	27.71	-0.611623
1954-04-28	27.76	27.76	27.76	27.76	2120000	27.76	0.180278
1954-04-29	28.18	28.18	28.18	28.18	2150000	28.18	1.50164
1954-04-30	28.26	28.26	28.26	28.26	2450000	28.26	0.283487
1954-05-03	28.21	28.21	28.21	28.21	1870000	28.21	-0.177085
1954-05-04	28.28	28.28	28.28	28.28	1990000	28.28	0.247832
1954-05-05	28.29	28.29	28.29	28.29	2020000	28.29	0.0353544
1954-05-06	28.51	28.51	28.51	28.51	1980000	28.51	0.774652
1954-05-07	28.65	28.65	28.65	28.65	2070000	28.65	0.489854
1954-05-10	28.62	28.62	28.62	28.62	1800000	28.62	-0.104767
1954-05-11	28.49	28.49	28.49	28.49	1770000	28.49	-0.455263
1954-05-12	28.72	28.72	28.72	28.72	2210000	28.72	0.80406
1954-05-13	28.56	28.56	28.56	28.56	2340000	28.56	-0.558661
1954-05-14	28.8	28.8	28.8	28.8	1970000	28.8	0.836825
1954-05-17	28.84	28.84	28.84	28.84	2040000	28.84	0.138793
1954-05-18	28.85	28.85	28.85	28.85	2250000	28.85	0.0346681
1954-05-19	28.72	28.72	28.72	28.72	2170000	28.72	-0.451625
1954-05-20	28.82	28.82	28.82	28.82	2070000	28.82	0.347585
1954-05-21	28.99	28.99	28.99	28.99	2620000	28.99	0.588135
1954-05-24	29	29	29	29	2330000	29	0.0344887
1954-05-25	28.93	28.93	28.93	28.93	2050000	28.93	-0.241671
1954-05-26	29.17	29.17	29.17	29.17	2180000	29.17	0.826166
1954-05-27	29.05	29.05	29.05	29.05	2230000	29.05	-0.41223
1954-05-28	29.19	29.19	29.19	29.19	1940000	29.19	0.48077
1954-06-01	29.19	29.19	29.19	29.19	1850000	29.19	0
1954-06-02	29.16	29.16	29.16	29.16	1930000	29.16	-0.102828
1954-06-03	29.15	29.15	29.15	29.15	1810000	29.15	-0.0342994
1954-06-04	29.1	29.1	29.1	29.1	1720000	29.1	-0.171674
1954-06-07	28.99	28.99	28.99	28.99	1520000	28.99	-0.378723
1954-06-08	28.34	28.34	28.34	28.34	2540000	28.34	-2.26767
1954-06-09	28.15	28.15	28.15	28.15	2360000	28.15	-0.672688
1954-06-10	28.34	28.34	28.34	28.34	1610000	28.34	0.672688
1954-06-11	28.58	28.58	28.58	28.58	1630000	28.58	0.843294
1954-06-14	28.62	28.62	28.62	28.62	1420000	28.62	0.13986
1954-06-15	28.83	28.83	28.83	28.83	1630000	28.83	0.731074
1954-06-16	29.04	29.04	29.04	29.04	2070000	29.04	0.725768
1954-06-17	28.96	28.96	28.96	28.96	1810000	28.96	-0.275862
1954-06-18	29.04	29.04	29.04	29.04	1580000	29.04	0.275862
1954-06-21	29.06	29.06	29.06	29.06	1820000	29.06	0.0688468
1954-06-22	29.08	29.08	29.08	29.08	2100000	29.08	0.0687995
1954-06-23	29.13	29.13	29.13	29.13	2090000	29.13	0.171792
1954-06-24	29.26	29.26	29.26	29.26	2260000	29.26	0.445282
1954-06-25	29.2	29.2	29.2	29.2	2060000	29.2	-0.205269
1954-06-28	29.28	29.28	29.28	29.28	1890000	29.28	0.273598
1954-06-29	29.43	29.43	29.43	29.43	2580000	29.43	0.510987
1954-06-30	29.21	29.21	29.21	29.21	1950000	29.21	-0.750345
1954-07-01	29.21	29.21	29.21	29.21	1860000	29.21	0
1954-07-02	29.59	29.59	29.59	29.59	1980000	29.59	1.29254
1954-07-06	29.92	29.92	29.92	29.92	2560000	29.92	1.10907
1954-07-07	29.94	29.94	29.94	29.94	2380000	29.94	0.0668226
1954-07-08	29.94	29.94	29.94	29.94	2080000	29.94	0
1954-07-09	30.14	30.14	30.14	30.14	2240000	30.14	0.665781
1954-07-12	30.12	30.12	30.12	30.12	2330000	30.12	-0.066379
1954-07-13	30.02	30.02	30.02	30.02	2430000	30.02	-0.332558
1954-07-14	30.09	30.09	30.09	30.09	2520000	30.09	0.232906
1954-07-15	30.19	30.19	30.19	30.19	3000000	30.19	0.331785
1954-07-16	30.06	30.06	30.06	30.06	2540000	30.06	-0.431536
1954-07-19	29.98	29.98	29.98	29.98	2370000	29.98	-0.266489
1954-07-20	29.84	29.84	29.84	29.84	2580000	29.84	-0.468072
1954-07-21	30.03	30.03	30.03	30.03	2510000	30.03	0.634711
1954-07-22	30.27	30.27	30.27	30.27	2890000	30.27	0.796024
1954-07-23	30.31	30.31	30.31	30.31	2520000	30.31	0.132057
1954-07-26	30.34	30.34	30.34	30.34	2110000	30.34	0.0989283
1954-07-27	30.52	30.52	30.52	30.52	2690000	30.52	0.591523
1954-07-28	30.58	30.58	30.58	30.58	2740000	30.58	0.196399
1954-07-29	30.69	30.69	30.69	30.69	2710000	30.69	0.359067
1954-07-30	30.88	30.88	30.88	30.88	2800000	30.88	0.617186
1954-08-02	30.99	30.99	30.99	30.99	2850000	30.99	0.355585
1954-08-03	30.93	30.93	30.93	30.93	2970000	30.93	-0.193799
1954-08-04	30.9	30.9	30.9	30.9	3620000	30.9	-0.0970403
1954-08-05	30.77	30.77	30.77	30.77	3150000	30.77	-0.421599
1954-08-06	30.38	30.38	30.38	30.38	3350000	30.38	-1.27557
1954-08-09	30.12	30.12	30.12	30.12	2280000	30.12	-0.859509
1954-08-10	30.37	30.37	30.37	30.37	2890000	30.37	0.826588
1954-08-11	30.72	30.72	30.72	30.72	3440000	30.72	1.14586
1954-08-12	30.59	30.59	30.59	30.59	2680000	30.59	-0.424075
1954-08-13	30.72	30.72	30.72	30.72	2500000	30.72	0.424075
1954-08-16	31.05	31.05	31.05	31.05	2760000	31.05	1.06849
1954-08-17	31.12	31.12	31.12	31.12	2900000	31.12	0.225189
1954-08-18	31.09	31.09	31.09	31.09	2390000	31.09	-0.0964475
1954-08-19	31.16	31.16	31.16	31.16	2320000	31.16	0.2249
1954-08-20	31.21	31.21	31.21	31.21	2110000	31.21	0.160334
1954-08-23	31	31	31	31	2020000	31	-0.675135
1954-08-24	30.87	30.87	30.87	30.87	2000000	30.87	-0.420237
1954-08-25	30.65	30.65	30.65	30.65	2280000	30.65	-0.715218
1954-08-26	30.57	30.57	30.57	30.57	2060000	30.57	-0.261353
1954-08-27	30.66	30.66	30.66	30.66	1740000	30.66	0.293974
1954-08-30	30.35	30.35	30.35	30.35	1950000	30.35	-1.01624
1954-08-31	29.83	29.83	29.83	29.83	2640000	29.83	-1.72819
1954-09-01	30.04	30.04	30.04	30.04	1790000	30.04	0.701523
1954-09-02	30.27	30.27	30.27	30.27	1600000	30.27	0.76273
1954-09-03	30.5	30.5	30.5	30.5	1630000	30.5	0.756956
1954-09-07	30.66	30.66	30.66	30.66	1860000	30.66	0.523219
1954-09-08	30.68	30.68	30.68	30.68	1970000	30.68	0.0652103
1954-09-09	30.73	30.73	30.73	30.73	1700000	30.73	0.16284
1954-09-10	30.84	30.84	30.84	30.84	1870000	30.84	0.357317
1954-09-13	31.12	31.12	31.12	31.12	2030000	31.12	0.903815
1954-09-14	31.28	31.28	31.28	31.28	2120000	31.28	0.512822
1954-09-15	31.29	31.29	31.29	31.29	2110000	31.29	0.0319642
1954-09-16	31.46	31.46	31.46	31.46	1880000	31.46	0.541834
1954-09-17	31.71	31.71	31.71	31.71	2250000	31.71	0.791519
1954-09-20	31.57	31.57	31.57	31.57	2060000	31.57	-0.442479
1954-09-21	31.79	31.79	31.79	31.79	1770000	31.79	0.694447
1954-09-22	32	32	32	32	2260000	32	0.658413
1954-09-23	32.18	32.18	32.18	32.18	2340000	32.18	0.560924
1954-09-24	32.4	32.4	32.4	32.4	2340000	32.4	0.681328
1954-09-27	32.53	32.53	32.53	32.53	2190000	32.53	0.400432
1954-09-28	32.69	32.69	32.69	32.69	1800000	32.69	0.490648
1954-09-29	32.5	32.5	32.5	32.5	1810000	32.5	-0.582913
1954-09-30	32.31	32.31	32.31	32.31	1840000	32.31	-0.586331
1954-10-01	32.29	32.29	32.29	32.29	1850000	32.29	-0.0619195
1954-10-04	32.47	32.47	32.47	32.47	2000000	32.47	0.5559
1954-10-05	32.63	32.63	32.63	32.63	2300000	32.63	0.491552
1954-10-06	32.76	32.76	32.76	32.76	2570000	32.76	0.397615
1954-10-07	32.69	32.69	32.69	32.69	1810000	32.69	-0.213904
1954-10-08	32.67	32.67	32.67	32.67	2120000	32.67	-0.0611995
1954-10-11	32.41	32.41	32.41	32.41	2100000	32.41	-0.799021
1954-10-12	32.28	32.28	32.28	32.28	1620000	32.28	-0.401917
1954-10-13	32.27	32.27	32.27	32.27	2070000	32.27	-0.0309837
1954-10-14	31.88	31.88	31.88	31.88	2540000	31.88	-1.21592
1954-10-15	31.71	31.71	31.71	31.71	2250000	31.71	-0.534677
1954-10-18	31.83	31.83	31.83	31.83	1790000	31.83	0.377715
1954-10-19	31.91	31.91	31.91	31.91	1900000	31.91	0.25102
1954-10-20	32.17	32.17	32.17	32.17	2380000	32.17	0.81149
1954-10-21	32.13	32.13	32.13	32.13	2320000	32.13	-0.124417
1954-10-22	32.13	32.13	32.13	32.13	2080000	32.13	0
1954-10-25	31.96	31.96	31.96	31.96	2340000	31.96	-0.530505
1954-10-26	31.94	31.94	31.94	31.94	2010000	31.94	-0.0625978
1954-10-27	32.02	32.02	32.02	32.02	2030000	32.02	0.250156
1954-10-28	31.88	31.88	31.88	31.88	2190000	31.88	-0.438185
1954-10-29	31.68	31.68	31.68	31.68	1900000	31.68	-0.629329
1954-11-01	31.79	31.79	31.79	31.79	1790000	31.79	0.346621
1954-11-03	32.44	32.44	32.44	32.44	2700000	32.44	2.02405
1954-11-04	32.82	32.82	32.82	32.82	3140000	32.82	1.16459
1954-11-05	32.71	32.71	32.71	32.71	2950000	32.71	-0.335724
1954-11-08	33.02	33.02	33.02	33.02	3180000	33.02	0.94326
1954-11-09	33.15	33.15	33.15	33.15	3240000	33.15	0.392928
1954-11-10	33.18	33.18	33.18	33.18	2070000	33.18	0.0904568
1954-11-11	33.47	33.47	33.47	33.47	2960000	33.47	0.870223
1954-11-12	33.54	33.54	33.54	33.54	3720000	33.54	0.208924
1954-11-15	33.47	33.47	33.47	33.47	3080000	33.47	-0.208924
1954-11-16	33.57	33.57	33.57	33.57	3260000	33.57	0.29833
1954-11-17	33.63	33.63	33.63	33.63	3830000	33.63	0.178571
1954-11-18	33.44	33.44	33.44	33.44	3530000	33.44	-0.566574
1954-11-19	33.45	33.45	33.45	33.45	3130000	33.45	0.0298998
1954-11-22	33.58	33.58	33.58	33.58	3000000	33.58	0.387887
1954-11-23	34.03	34.03	34.03	34.03	3690000	34.03	1.33118
1954-11-24	34.22	34.22	34.22	34.22	3990000	34.22	0.556778
1954-11-26	34.55	34.55	34.55	34.55	3010000	34.55	0.959728
1954-11-29	34.54	34.54	34.54	34.54	3300000	34.54	-0.0289477
1954-11-30	34.24	34.24	34.24	34.24	3440000	34.24	-0.872352
1954-12-01	33.99	33.99	33.99	33.99	3100000	33.99	-0.732819
1954-12-02	34.18	34.18	34.18	34.18	3190000	34.18	0.557431
1954-12-03	34.49	34.49	34.49	34.49	3790000	34.49	0.902875
1954-12-06	34.76	34.76	34.76	34.76	3960000	34.76	0.779787
1954-12-07	34.92	34.92	34.92	34.92	3820000	34.92	0.459243
1954-12-08	34.86	34.86	34.86	34.86	4150000	34.86	-0.171969
1954-12-09	34.69	34.69	34.69	34.69	3300000	34.69	-0.488858
1954-12-10	34.56	34.56	34.56	34.56	3250000	34.56	-0.375452
1954-12-13	34.59	34.59	34.59	34.59	2750000	34.59	0.0867679
1954-12-14	34.35	34.35	34.35	34.35	2650000	34.35	-0.69626
1954-12-15	34.56	34.56	34.56	34.56	2740000	34.56	0.609493
1954-12-16	34.93	34.93	34.93	34.93	3390000	34.93	1.06491
1954-12-17	35.92	35.92	35.92	35.92	3730000	35.92	2.79482
1954-12-20	35.33	35.33	35.33	35.33	3770000	35.33	-1.65618
1954-12-21	35.38	35.38	35.38	35.38	3630000	35.38	0.141423
1954-12-22	35.34	35.34	35.34	35.34	3460000	35.34	-0.113122
1954-12-23	35.37	35.37	35.37	35.37	3310000	35.37	0.0848536
1954-12-27	35.07	35.07	35.07	35.07	2970000	35.07	-0.851794
1954-12-28	35.43	35.43	35.43	35.43	3660000	35.43	1.02129
1954-12-29	35.74	35.74	35.74	35.74	4430000	35.74	0.871159
1954-12-30	35.74	35.74	35.74	35.74	3590000	35.74	0
1954-12-31	35.98	35.98	35.98	35.98	3840000	35.98	0.669272
1955-01-03	36.75	36.75	36.75	36.75	4570000	36.75	2.1175
1955-01-04	36.42	36.42	36.42	36.42	4420000	36.42	-0.902015
1955-01-05	35.52	35.52	35.52	35.52	4640000	35.52	-2.50222
1955-01-06	35.04	35.04	35.04	35.04	5300000	35.04	-1.36057
1955-01-07	35.33	35.33	35.33	35.33	4030000	35.33	0.82422
1955-01-10	35.79	35.79	35.79	35.79	4300000	35.79	1.29361
1955-01-11	35.68	35.68	35.68	35.68	3680000	35.68	-0.307822
1955-01-12	35.58	35.58	35.58	35.58	3400000	35.58	-0.280663
1955-01-13	35.43	35.43	35.43	35.43	3350000	35.43	-0.422476
1955-01-14	35.28	35.28	35.28	35.28	2630000	35.28	-0.424269
1955-01-17	34.58	34.58	34.58	34.58	3360000	34.58	-2.00408
1955-01-18	34.8	34.8	34.8	34.8	3020000	34.8	0.634191
1955-01-19	34.96	34.96	34.96	34.96	2760000	34.96	0.458716
1955-01-20	35.13	35.13	35.13	35.13	2210000	35.13	0.485092
1955-01-21	35.44	35.44	35.44	35.44	2690000	35.44	0.878566
1955-01-24	35.52	35.52	35.52	35.52	2910000	35.52	0.225479
1955-01-25	35.51	35.51	35.51	35.51	3230000	35.51	-0.0281571
1955-01-26	35.95	35.95	35.95	35.95	3860000	35.95	1.23147
1955-01-27	35.99	35.99	35.99	35.99	3500000	35.99	0.111204
1955-01-28	36.19	36.19	36.19	36.19	3290000	36.19	0.554172
1955-01-31	36.63	36.63	36.63	36.63	3500000	36.63	1.20847
1955-02-01	36.72	36.72	36.72	36.72	3320000	36.72	0.245399
1955-02-02	36.61	36.61	36.61	36.61	3210000	36.61	-0.300014
1955-02-03	36.44	36.44	36.44	36.44	2890000	36.44	-0.465435
1955-02-04	36.96	36.96	36.96	36.96	3370000	36.96	1.41692
1955-02-07	36.96	36.96	36.96	36.96	3610000	36.96	0
1955-02-08	36.46	36.46	36.46	36.46	3400000	36.46	-1.36205
1955-02-09	36.75	36.75	36.75	36.75	3360000	36.75	0.792246
1955-02-10	37.08	37.08	37.08	37.08	3460000	37.08	0.893952
1955-02-11	37.15	37.15	37.15	37.15	3260000	37.15	0.188603
1955-02-14	36.89	36.89	36.89	36.89	2950000	36.89	-0.702326
1955-02-15	36.89	36.89	36.89	36.89	3510000	36.89	0
1955-02-16	36.77	36.77	36.77	36.77	3660000	36.77	-0.325822
1955-02-17	36.84	36.84	36.84	36.84	3030000	36.84	0.190192
1955-02-18	36.89	36.89	36.89	36.89	3660000	36.89	0.13563
1955-02-21	36.85	36.85	36.85	36.85	3010000	36.85	-0.108489
1955-02-23	36.82	36.82	36.82	36.82	3030000	36.82	-0.0814443
1955-02-24	36.62	36.62	36.62	36.62	2920000	36.62	-0.544664
1955-02-25	36.57	36.57	36.57	36.57	2540000	36.57	-0.136631
1955-02-28	36.76	36.76	36.76	36.76	2620000	36.76	0.518207
1955-03-01	36.83	36.83	36.83	36.83	2830000	36.83	0.190243
1955-03-02	37.15	37.15	37.15	37.15	3370000	37.15	0.865104
1955-03-03	37.29	37.29	37.29	37.29	3330000	37.29	0.376142
1955-03-04	37.52	37.52	37.52	37.52	2770000	37.52	0.614893
1955-03-07	37.28	37.28	37.28	37.28	2630000	37.28	-0.641713
1955-03-08	36.58	36.58	36.58	36.58	3160000	36.58	-1.89553
1955-03-09	36.22	36.22	36.22	36.22	3590000	36.22	-0.989019
1955-03-10	36.45	36.45	36.45	36.45	2760000	36.45	0.633001
1955-03-11	35.82	35.82	35.82	35.82	3040000	35.82	-1.74351
1955-03-14	34.96	34.96	34.96	34.96	4220000	34.96	-2.43018
1955-03-15	35.71	35.71	35.71	35.71	3160000	35.71	2.12262
1955-03-16	35.98	35.98	35.98	35.98	2900000	35.98	0.753247
1955-03-17	36.12	36.12	36.12	36.12	2200000	36.12	0.38835
1955-03-18	36.18	36.18	36.18	36.18	2050000	36.18	0.165975
1955-03-21	35.95	35.95	35.95	35.95	2020000	35.95	-0.63774
1955-03-22	36.17	36.17	36.17	36.17	1910000	36.17	0.610096
1955-03-23	36.64	36.64	36.64	36.64	2730000	36.64	1.29105
1955-03-24	36.93	36.93	36.93	36.93	3170000	36.93	0.788369
1955-03-25	36.96	36.96	36.96	36.96	2540000	36.96	0.0812018
1955-03-28	36.83	36.83	36.83	36.83	2540000	36.83	-0.352352
1955-03-29	36.85	36.85	36.85	36.85	2770000	36.85	0.0542888
1955-03-30	36.52	36.52	36.52	36.52	3410000	36.52	-0.899556
1955-03-31	36.58	36.58	36.58	36.58	2680000	36.58	0.164159
1955-04-01	36.95	36.95	36.95	36.95	2660000	36.95	1.0064
1955-04-04	36.83	36.83	36.83	36.83	2500000	36.83	-0.325292
1955-04-05	36.98	36.98	36.98	36.98	2100000	36.98	0.40645
1955-04-06	37.17	37.17	37.17	37.17	2500000	37.17	0.512476
1955-04-07	37.34	37.34	37.34	37.34	2330000	37.34	0.456315
1955-04-11	37.44	37.44	37.44	37.44	2680000	37.44	0.267451
1955-04-12	37.66	37.66	37.66	37.66	2770000	37.66	0.585887
1955-04-13	37.71	37.71	37.71	37.71	2820000	37.71	0.132679
1955-04-14	37.79	37.79	37.79	37.79	2890000	37.79	0.211921
1955-04-15	37.96	37.96	37.96	37.96	3180000	37.96	0.448846
1955-04-18	38.27	38.27	38.27	38.27	3080000	38.27	0.813333
1955-04-19	38.22	38.22	38.22	38.22	2700000	38.22	-0.130736
1955-04-20	38.28	38.28	38.28	38.28	3090000	38.28	0.156863
1955-04-21	38.32	38.32	38.32	38.32	2810000	38.32	0.104439
1955-04-22	38.01	38.01	38.01	38.01	2800000	38.01	-0.812267
1955-04-25	38.11	38.11	38.11	38.11	2720000	38.11	0.262743
1955-04-26	38.31	38.31	38.31	38.31	2720000	38.31	0.523424
1955-04-27	38.11	38.11	38.11	38.11	2660000	38.11	-0.523424
1955-04-28	37.68	37.68	37.68	37.68	2550000	37.68	-1.13473
1955-04-29	37.96	37.96	37.96	37.96	2230000	37.96	0.740352
1955-05-02	38.04	38.04	38.04	38.04	2220000	38.04	0.210526
1955-05-03	37.7	37.7	37.7	37.7	2630000	37.7	-0.897814
1955-05-04	37.64	37.64	37.64	37.64	2220000	37.64	-0.159278
1955-05-05	37.82	37.82	37.82	37.82	2270000	37.82	0.477075
1955-05-06	37.89	37.89	37.89	37.89	2250000	37.89	0.184916
1955-05-09	37.93	37.93	37.93	37.93	2090000	37.93	0.105513
1955-05-10	37.85	37.85	37.85	37.85	2150000	37.85	-0.211138
1955-05-11	37.42	37.42	37.42	37.42	2120000	37.42	-1.14257
1955-05-12	37.2	37.2	37.2	37.2	2830000	37.2	-0.589656
1955-05-13	37.44	37.44	37.44	37.44	1860000	37.44	0.643089
1955-05-16	37.02	37.02	37.02	37.02	2160000	37.02	-1.12813
1955-05-17	36.97	36.97	36.97	36.97	1900000	36.97	-0.135153
1955-05-18	37.28	37.28	37.28	37.28	2010000	37.28	0.835022
1955-05-19	37.49	37.49	37.49	37.49	2380000	37.49	0.561724
1955-05-20	37.74	37.74	37.74	37.74	2240000	37.74	0.664631
1955-05-23	37.48	37.48	37.48	37.48	1900000	37.48	-0.691308
1955-05-24	37.46	37.46	37.46	37.46	1650000	37.46	-0.053376
1955-05-25	37.6	37.6	37.6	37.6	2100000	37.6	0.373035
1955-05-26	37.85	37.85	37.85	37.85	2260000	37.85	0.662693
1955-05-27	37.93	37.93	37.93	37.93	2220000	37.93	0.211138
1955-05-31	37.91	37.91	37.91	37.91	1990000	37.91	-0.0527426
1955-06-01	37.96	37.96	37.96	37.96	2510000	37.96	0.131804
1955-06-02	38.01	38.01	38.01	38.01	2610000	38.01	0.131631
1955-06-03	38.37	38.37	38.37	38.37	2590000	38.37	0.942662
1955-06-06	39.69	39.69	39.69	39.69	2560000	39.69	3.38234
1955-06-07	39.96	39.96	39.96	39.96	3230000	39.96	0.677969
1955-06-08	39.22	39.22	39.22	39.22	3300000	39.22	-1.86921
1955-06-09	39.01	39.01	39.01	39.01	2960000	39.01	-0.53688
1955-06-10	39.25	39.25	39.25	39.25	2470000	39.25	0.613342
1955-06-13	39.62	39.62	39.62	39.62	2770000	39.62	0.93826
1955-06-14	39.67	39.67	39.67	39.67	2860000	39.67	0.126119
1955-06-15	39.89	39.89	39.89	39.89	2650000	39.89	0.553043
1955-06-16	39.96	39.96	39.96	39.96	2760000	39.96	0.175329
1955-06-17	40.1	40.1	40.1	40.1	2340000	40.1	0.349738
1955-06-20	40.14	40.14	40.14	40.14	2490000	40.14	0.0997009
1955-06-21	40.51	40.51	40.51	40.51	2720000	40.51	0.917551
1955-06-22	40.6	40.6	40.6	40.6	3010000	40.6	0.221921
1955-06-23	40.75	40.75	40.75	40.75	2900000	40.75	0.368777
1955-06-24	40.96	40.96	40.96	40.96	2410000	40.96	0.514014
1955-06-27	40.99	40.99	40.99	40.99	2250000	40.99	0.0732154
1955-06-28	40.77	40.77	40.77	40.77	2180000	40.77	-0.538162
1955-06-29	40.79	40.79	40.79	40.79	2180000	40.79	0.0490436
1955-06-30	41.03	41.03	41.03	41.03	2370000	41.03	0.586655
1955-07-01	41.19	41.19	41.19	41.19	2540000	41.19	0.3892
1955-07-05	41.69	41.69	41.69	41.69	2680000	41.69	1.20658
1955-07-06	43.18	43.18	43.18	43.18	3140000	43.18	3.51161
1955-07-07	42.58	42.58	42.58	42.58	3300000	42.58	-1.39928
1955-07-08	42.64	42.64	42.64	42.64	2450000	42.64	0.140812
1955-07-11	42.75	42.75	42.75	42.75	2420000	42.75	0.257642
1955-07-12	42.75	42.75	42.75	42.75	2630000	42.75	0
1955-07-13	42.24	42.24	42.24	42.24	2360000	42.24	-1.20016
1955-07-14	42.25	42.25	42.25	42.25	1980000	42.25	0.0236714
1955-07-15	42.4	42.4	42.4	42.4	2230000	42.4	0.354401
1955-07-18	42.36	42.36	42.36	42.36	2160000	42.36	-0.0943842
1955-07-19	42.1	42.1	42.1	42.1	2300000	42.1	-0.615678
1955-07-20	42.23	42.23	42.23	42.23	2080000	42.23	0.308313
1955-07-21	42.64	42.64	42.64	42.64	2530000	42.64	0.966191
1955-07-22	43	43	43	43	2500000	43	0.840734
1955-07-25	43.48	43.48	43.48	43.48	2500000	43.48	1.11009
1955-07-26	43.58	43.58	43.58	43.58	2340000	43.58	0.229727
1955-07-27	43.76	43.76	43.76	43.76	2170000	43.76	0.412183
1955-07-28	43.5	43.5	43.5	43.5	2090000	43.5	-0.595922
1955-07-29	43.52	43.52	43.52	43.52	2070000	43.52	0.0459664
1955-08-01	42.93	42.93	42.93	42.93	2190000	42.93	-1.36497
1955-08-02	43.03	43.03	43.03	43.03	2260000	43.03	0.232666
1955-08-03	43.09	43.09	43.09	43.09	2190000	43.09	0.13934
1955-08-04	42.36	42.36	42.36	42.36	2210000	42.36	-1.70864
1955-08-05	42.56	42.56	42.56	42.56	1690000	42.56	0.471032
1955-08-08	42.31	42.31	42.31	42.31	1730000	42.31	-0.589138
1955-08-09	41.75	41.75	41.75	41.75	2240000	41.75	-1.3324
1955-08-10	41.74	41.74	41.74	41.74	1580000	41.74	-0.023955
1955-08-11	42.13	42.13	42.13	42.13	1620000	42.13	0.930017
1955-08-12	42.21	42.21	42.21	42.21	1530000	42.21	0.189708
1955-08-15	42.17	42.17	42.17	42.17	1230000	42.17	-0.0948092
1955-08-16	41.86	41.86	41.86	41.86	1520000	41.86	-0.737835
1955-08-17	41.9	41.9	41.9	41.9	1570000	41.9	0.095511
1955-08-18	41.84	41.84	41.84	41.84	1560000	41.84	-0.143301
1955-08-19	42.02	42.02	42.02	42.02	1400000	42.02	0.429288
1955-08-22	41.98	41.98	41.98	41.98	1430000	41.98	-0.0952381
1955-08-23	42.55	42.55	42.55	42.55	1890000	42.55	1.34865
1955-08-24	42.61	42.61	42.61	42.61	2140000	42.61	0.140911
1955-08-25	42.8	42.8	42.8	42.8	2120000	42.8	0.444914
1955-08-26	42.99	42.99	42.99	42.99	2200000	42.99	0.442943
1955-08-29	42.96	42.96	42.96	42.96	1910000	42.96	-0.069808
1955-08-30	42.92	42.92	42.92	42.92	1740000	42.92	-0.0931532
1955-08-31	43.18	43.18	43.18	43.18	1850000	43.18	0.603951
1955-09-01	43.37	43.37	43.37	43.37	1860000	43.37	0.439053
1955-09-02	43.6	43.6	43.6	43.6	1700000	43.6	0.528919
1955-09-06	43.86	43.86	43.86	43.86	2360000	43.86	0.594559
1955-09-07	43.85	43.85	43.85	43.85	2380000	43.85	-0.0228024
1955-09-08	43.88	43.88	43.88	43.88	2470000	43.88	0.0683917
1955-09-09	43.89	43.89	43.89	43.89	2480000	43.89	0.0227868
1955-09-12	44.19	44.19	44.19	44.19	2520000	44.19	0.681202
1955-09-13	44.8	44.8	44.8	44.8	2580000	44.8	1.37096
1955-09-14	44.99	44.99	44.99	44.99	2570000	44.99	0.42321
1955-09-15	44.75	44.75	44.75	44.75	2890000	44.75	-0.53488
1955-09-16	45.09	45.09	45.09	45.09	2540000	45.09	0.756905
1955-09-19	45.16	45.16	45.16	45.16	2390000	45.16	0.155125
1955-09-20	45.13	45.13	45.13	45.13	2090000	45.13	-0.0664525
1955-09-21	45.39	45.39	45.39	45.39	2460000	45.39	0.57446
1955-09-22	45.39	45.39	45.39	45.39	2550000	45.39	0
1955-09-23	45.63	45.63	45.63	45.63	2540000	45.63	0.527358
1955-09-26	42.61	42.61	42.61	42.61	7720000	42.61	-6.84764
1955-09-27	43.58	43.58	43.58	43.58	5500000	43.58	2.25094
1955-09-28	44.31	44.31	44.31	44.31	3780000	44.31	1.66121
1955-09-29	44.03	44.03	44.03	44.03	2560000	44.03	-0.633917
1955-09-30	43.67	43.67	43.67	43.67	2140000	43.67	-0.820985
1955-10-03	42.49	42.49	42.49	42.49	2720000	42.49	-2.73926
1955-10-04	42.82	42.82	42.82	42.82	2020000	42.82	0.773653
1955-10-05	42.99	42.99	42.99	42.99	1920000	42.99	0.396225
1955-10-06	42.7	42.7	42.7	42.7	1690000	42.7	-0.676861
1955-10-07	42.38	42.38	42.38	42.38	2150000	42.38	-0.752237
1955-10-10	41.15	41.15	41.15	41.15	3100000	41.15	-2.94526
1955-10-11	40.8	40.8	40.8	40.8	3590000	40.8	-0.854185
1955-10-12	41.52	41.52	41.52	41.52	1900000	41.52	1.74932
1955-10-13	41.39	41.39	41.39	41.39	1980000	41.39	-0.313593
1955-10-14	41.22	41.22	41.22	41.22	1640000	41.22	-0.411573
1955-10-17	41.35	41.35	41.35	41.35	1480000	41.35	0.314885
1955-10-18	41.65	41.65	41.65	41.65	1550000	41.65	0.722895
1955-10-19	42.07	42.07	42.07	42.07	1760000	42.07	1.00335
1955-10-20	42.59	42.59	42.59	42.59	2160000	42.59	1.22846
1955-10-21	42.59	42.59	42.59	42.59	1710000	42.59	0
1955-10-24	42.91	42.91	42.91	42.91	1820000	42.91	0.748542
1955-10-25	42.63	42.63	42.63	42.63	1950000	42.63	-0.654667
1955-10-26	42.29	42.29	42.29	42.29	1660000	42.29	-0.800758
1955-10-27	42.34	42.34	42.34	42.34	1830000	42.34	0.118161
1955-10-28	42.37	42.37	42.37	42.37	1720000	42.37	0.0708299
1955-10-31	42.34	42.34	42.34	42.34	1800000	42.34	-0.0708299
1955-11-01	42.28	42.28	42.28	42.28	1590000	42.28	-0.14181
1955-11-02	42.35	42.35	42.35	42.35	1610000	42.35	0.165426
1955-11-03	43.24	43.24	43.24	43.24	2260000	43.24	2.07976
1955-11-04	43.96	43.96	43.96	43.96	2430000	43.96	1.65141
1955-11-07	44.15	44.15	44.15	44.15	2230000	44.15	0.43128
1955-11-09	44.61	44.61	44.61	44.61	2580000	44.61	1.03651
1955-11-10	44.72	44.72	44.72	44.72	2550000	44.72	0.246278
1955-11-11	45.24	45.24	45.24	45.24	2000000	45.24	1.15608
1955-11-14	46.41	46.41	46.41	46.41	2760000	46.41	2.55333
1955-11-15	46.21	46.21	46.21	46.21	2560000	46.21	-0.431873
1955-11-16	45.91	45.91	45.91	45.91	2460000	45.91	-0.651327
1955-11-17	45.59	45.59	45.59	45.59	2310000	45.59	-0.699456
1955-11-18	45.54	45.54	45.54	45.54	2320000	45.54	-0.109733
1955-11-21	45.22	45.22	45.22	45.22	1960000	45.22	-0.705159
1955-11-22	45.66	45.66	45.66	45.66	2270000	45.66	0.968317
1955-11-23	45.72	45.72	45.72	45.72	2550000	45.72	0.13132
1955-11-25	45.68	45.68	45.68	45.68	2190000	45.68	-0.0875274
1955-11-28	45.38	45.38	45.38	45.38	2460000	45.38	-0.658909
1955-11-29	45.56	45.56	45.56	45.56	2370000	45.56	0.395866
1955-11-30	45.51	45.51	45.51	45.51	2900000	45.51	-0.109806
1955-12-01	45.35	45.35	45.35	45.35	2370000	45.35	-0.352191
1955-12-02	45.44	45.44	45.44	45.44	2400000	45.44	0.19826
1955-12-05	45.7	45.7	45.7	45.7	2440000	45.7	0.570552
1955-12-06	45.7	45.7	45.7	45.7	2540000	45.7	0
1955-12-07	45.55	45.55	45.55	45.55	2480000	45.55	-0.328767
1955-12-08	45.82	45.82	45.82	45.82	2970000	45.82	0.591005
1955-12-09	45.89	45.89	45.89	45.89	2660000	45.89	0.152655
1955-12-12	45.42	45.42	45.42	45.42	2510000	45.42	-1.02947
1955-12-13	45.45	45.45	45.45	45.45	2430000	45.45	0.0660284
1955-12-14	45.07	45.07	45.07	45.07	2670000	45.07	-0.839598
1955-12-15	45.06	45.06	45.06	45.06	2260000	45.06	-0.0221902
1955-12-16	45.13	45.13	45.13	45.13	2310000	45.13	0.155228
1955-12-19	45.02	45.02	45.02	45.02	2380000	45.02	-0.244038
1955-12-20	44.95	44.95	44.95	44.95	2280000	44.95	-0.155607
1955-12-21	45.84	45.84	45.84	45.84	2540000	45.84	1.96063
1955-12-22	45.41	45.41	45.41	45.41	2650000	45.41	-0.942473
1955-12-23	45.5	45.5	45.5	45.5	2090000	45.5	0.197998
1955-12-27	45.22	45.22	45.22	45.22	2010000	45.22	-0.617286
1955-12-28	45.05	45.05	45.05	45.05	1990000	45.05	-0.376648
1955-12-29	45.15	45.15	45.15	45.15	2190000	45.15	0.22173
1955-12-30	45.48	45.48	45.48	45.48	2820000	45.48	0.728239
1956-01-03	45.16	45.16	45.16	45.16	2390000	45.16	-0.706093
1956-01-04	45	45	45	45	2290000	45	-0.354925
1956-01-05	44.95	44.95	44.95	44.95	2110000	44.95	-0.111173
1956-01-06	45.14	45.14	45.14	45.14	2570000	45.14	0.421801
1956-01-09	44.51	44.51	44.51	44.51	2700000	44.51	-1.40549
1956-01-10	44.16	44.16	44.16	44.16	2640000	44.16	-0.789448
1956-01-11	44.38	44.38	44.38	44.38	2310000	44.38	0.496952
1956-01-12	44.75	44.75	44.75	44.75	2330000	44.75	0.830253
1956-01-13	44.67	44.67	44.67	44.67	2120000	44.67	-0.178931
1956-01-16	44.14	44.14	44.14	44.14	2260000	44.14	-1.19357
1956-01-17	44.47	44.47	44.47	44.47	2050000	44.47	0.74484
1956-01-18	44.17	44.17	44.17	44.17	2110000	44.17	-0.676898
1956-01-19	43.72	43.72	43.72	43.72	2500000	43.72	-1.02402
1956-01-20	43.22	43.22	43.22	43.22	2430000	43.22	-1.15023
1956-01-23	43.11	43.11	43.11	43.11	2720000	43.11	-0.254836
1956-01-24	43.65	43.65	43.65	43.65	2160000	43.65	1.24483
1956-01-25	43.72	43.72	43.72	43.72	1950000	43.72	0.160238
1956-01-26	43.46	43.46	43.46	43.46	1840000	43.46	-0.596469
1956-01-27	43.35	43.35	43.35	43.35	1950000	43.35	-0.253427
1956-01-30	43.5	43.5	43.5	43.5	1830000	43.5	0.345423
1956-01-31	43.82	43.82	43.82	43.82	1900000	43.82	0.73294
1956-02-01	44.03	44.03	44.03	44.03	2010000	44.03	0.478089
1956-02-02	44.22	44.22	44.22	44.22	1900000	44.22	0.430596
1956-02-03	44.78	44.78	44.78	44.78	2110000	44.78	1.25844
1956-02-06	44.81	44.81	44.81	44.81	2230000	44.81	0.0669718
1956-02-07	44.6	44.6	44.6	44.6	2060000	44.6	-0.469747
1956-02-08	44.16	44.16	44.16	44.16	2170000	44.16	-0.991446
1956-02-09	43.66	43.66	43.66	43.66	2080000	43.66	-1.13871
1956-02-10	43.64	43.64	43.64	43.64	1770000	43.64	-0.045819
1956-02-13	43.58	43.58	43.58	43.58	1420000	43.58	-0.137583
1956-02-14	43.42	43.42	43.42	43.42	1590000	43.42	-0.367817
1956-02-15	44.04	44.04	44.04	44.04	3000000	44.04	1.41781
1956-02-16	43.82	43.82	43.82	43.82	1750000	43.82	-0.500798
1956-02-17	44.52	44.52	44.52	44.52	2840000	44.52	1.58482
1956-02-20	44.45	44.45	44.45	44.45	2530000	44.45	-0.157356
1956-02-21	44.56	44.56	44.56	44.56	2240000	44.56	0.247163
1956-02-23	44.95	44.95	44.95	44.95	2900000	44.95	0.871417
1956-02-24	45.32	45.32	45.32	45.32	2890000	45.32	0.819768
1956-02-27	45.27	45.27	45.27	45.27	2440000	45.27	-0.110387
1956-02-28	45.43	45.43	45.43	45.43	2540000	45.43	0.352812
1956-02-29	45.34	45.34	45.34	45.34	3900000	45.34	-0.198303
1956-03-01	45.54	45.54	45.54	45.54	2410000	45.54	0.440142
1956-03-02	45.81	45.81	45.81	45.81	2860000	45.81	0.591135
1956-03-05	46.06	46.06	46.06	46.06	3090000	46.06	0.544249
1956-03-06	46.04	46.04	46.04	46.04	2770000	46.04	-0.0434311
1956-03-07	46.01	46.01	46.01	46.01	2380000	46.01	-0.065182
1956-03-08	46.12	46.12	46.12	46.12	2500000	46.12	0.238793
1956-03-09	46.7	46.7	46.7	46.7	3430000	46.7	1.24975
1956-03-12	47.13	47.13	47.13	47.13	3110000	47.13	0.916558
1956-03-13	47.06	47.06	47.06	47.06	2790000	47.06	-0.148636
1956-03-14	47.53	47.53	47.53	47.53	3140000	47.53	0.993771
1956-03-15	47.99	47.99	47.99	47.99	3270000	47.99	0.963157
1956-03-16	48.14	48.14	48.14	48.14	3120000	48.14	0.312078
1956-03-19	48.59	48.59	48.59	48.59	2570000	48.59	0.930432
1956-03-20	48.87	48.87	48.87	48.87	2960000	48.87	0.574596
1956-03-21	48.23	48.23	48.23	48.23	2930000	48.23	-1.31825
1956-03-22	48.72	48.72	48.72	48.72	2650000	48.72	1.01084
1956-03-23	48.83	48.83	48.83	48.83	2980000	48.83	0.225525
1956-03-26	48.62	48.62	48.62	48.62	2720000	48.62	-0.430991
1956-03-27	48.25	48.25	48.25	48.25	2540000	48.25	-0.763914
1956-03-28	48.51	48.51	48.51	48.51	2610000	48.51	0.537413
1956-03-29	48.48	48.48	48.48	48.48	3480000	48.48	-0.061862
1956-04-02	48.7	48.7	48.7	48.7	3120000	48.7	0.452769
1956-04-03	48.53	48.53	48.53	48.53	2760000	48.53	-0.349687
1956-04-04	48.8	48.8	48.8	48.8	2760000	48.8	0.554815
1956-04-05	48.57	48.57	48.57	48.57	2950000	48.57	-0.472426
1956-04-06	48.85	48.85	48.85	48.85	2600000	48.85	0.574832
1956-04-09	48.61	48.61	48.61	48.61	2760000	48.61	-0.492511
1956-04-10	47.93	47.93	47.93	47.93	2590000	47.93	-1.40877
1956-04-11	48.31	48.31	48.31	48.31	2440000	48.31	0.789697
1956-04-12	48.02	48.02	48.02	48.02	2700000	48.02	-0.602099
1956-04-13	47.95	47.95	47.95	47.95	2450000	47.95	-0.145879
1956-04-16	47.96	47.96	47.96	47.96	2310000	47.96	0.0208529
1956-04-17	47.93	47.93	47.93	47.93	2330000	47.93	-0.0625717
1956-04-18	47.74	47.74	47.74	47.74	2470000	47.74	-0.397199
1956-04-19	47.57	47.57	47.57	47.57	2210000	47.57	-0.356731
1956-04-20	47.76	47.76	47.76	47.76	2320000	47.76	0.398616
1956-04-23	47.65	47.65	47.65	47.65	2440000	47.65	-0.230584
1956-04-24	47.26	47.26	47.26	47.26	2500000	47.26	-0.821836
1956-04-25	47.09	47.09	47.09	47.09	2270000	47.09	-0.360361
1956-04-26	47.49	47.49	47.49	47.49	2630000	47.49	0.84585
1956-04-27	47.99	47.99	47.99	47.99	2760000	47.99	1.04735
1956-04-30	48.38	48.38	48.38	48.38	2730000	48.38	0.809385
1956-05-01	48.16	48.16	48.16	48.16	2500000	48.16	-0.45577
1956-05-02	48.17	48.17	48.17	48.17	2440000	48.17	0.020762
1956-05-03	48.34	48.34	48.34	48.34	2640000	48.34	0.352295
1956-05-04	48.51	48.51	48.51	48.51	2860000	48.51	0.351059
1956-05-07	48.22	48.22	48.22	48.22	2550000	48.22	-0.599609
1956-05-08	48.02	48.02	48.02	48.02	2440000	48.02	-0.415628
1956-05-09	47.94	47.94	47.94	47.94	2550000	47.94	-0.166736
1956-05-10	47.16	47.16	47.16	47.16	2850000	47.16	-1.64042
1956-05-11	47.12	47.12	47.12	47.12	2450000	47.12	-0.0848536
1956-05-14	46.86	46.86	46.86	46.86	2440000	46.86	-0.553311
1956-05-15	46.37	46.37	46.37	46.37	2650000	46.37	-1.05117
1956-05-16	46.05	46.05	46.05	46.05	2080000	46.05	-0.692494
1956-05-17	46.61	46.61	46.61	46.61	1970000	46.61	1.20873
1956-05-18	46.39	46.39	46.39	46.39	2020000	46.39	-0.473119
1956-05-21	45.99	45.99	45.99	45.99	1940000	45.99	-0.865994
1956-05-22	45.26	45.26	45.26	45.26	2290000	45.26	-1.60003
1956-05-23	45.02	45.02	45.02	45.02	2140000	45.02	-0.53168
1956-05-24	44.6	44.6	44.6	44.6	2600000	44.6	-0.937298
1956-05-25	44.62	44.62	44.62	44.62	2570000	44.62	0.044833
1956-05-28	44.1	44.1	44.1	44.1	2780000	44.1	-1.17224
1956-05-29	45.11	45.11	45.11	45.11	2430000	45.11	2.26442
1956-05-31	45.2	45.2	45.2	45.2	2020000	45.2	0.199314
1956-06-01	45.58	45.58	45.58	45.58	1440000	45.58	0.837194
1956-06-04	45.85	45.85	45.85	45.85	1500000	45.85	0.590617
1956-06-05	45.86	45.86	45.86	45.86	1650000	45.86	0.0218079
1956-06-06	45.63	45.63	45.63	45.63	1460000	45.63	-0.502788
1956-06-07	45.99	45.99	45.99	45.99	1630000	45.99	0.785859
1956-06-08	45.14	45.14	45.14	45.14	3630000	45.14	-1.86552
1956-06-11	45.71	45.71	45.71	45.71	2000000	45.71	1.25483
1956-06-12	46.36	46.36	46.36	46.36	1900000	46.36	1.41199
1956-06-13	46.42	46.42	46.42	46.42	1760000	46.42	0.129338
1956-06-14	46.31	46.31	46.31	46.31	1670000	46.31	-0.237248
1956-06-15	46.37	46.37	46.37	46.37	1550000	46.37	0.129478
1956-06-18	46.17	46.17	46.17	46.17	1440000	46.17	-0.432246
1956-06-19	46.22	46.22	46.22	46.22	1430000	46.22	0.108237
1956-06-20	46.41	46.41	46.41	46.41	1670000	46.41	0.410235
1956-06-21	46.73	46.73	46.73	46.73	1820000	46.73	0.68714
1956-06-22	46.59	46.59	46.59	46.59	1630000	46.59	-0.300043
1956-06-25	46.41	46.41	46.41	46.41	1500000	46.41	-0.387097
1956-06-26	46.72	46.72	46.72	46.72	1730000	46.72	0.665739
1956-06-27	47.07	47.07	47.07	47.07	2090000	47.07	0.746352
1956-06-28	47.13	47.13	47.13	47.13	1900000	47.13	0.127389
1956-06-29	46.97	46.97	46.97	46.97	1780000	46.97	-0.340064
1956-07-02	46.93	46.93	46.93	46.93	1610000	46.93	-0.085197
1956-07-03	47.32	47.32	47.32	47.32	1840000	47.32	0.827591
1956-07-05	47.8	47.8	47.8	47.8	2240000	47.8	1.00926
1956-07-06	48.04	48.04	48.04	48.04	2180000	48.04	0.500836
1956-07-09	48.25	48.25	48.25	48.25	2180000	48.25	0.436183
1956-07-10	48.54	48.54	48.54	48.54	2450000	48.54	0.599237
1956-07-11	48.69	48.69	48.69	48.69	2520000	48.69	0.308547
1956-07-12	48.58	48.58	48.58	48.58	2180000	48.58	-0.226175
1956-07-13	48.72	48.72	48.72	48.72	2020000	48.72	0.28777
1956-07-16	49.14	49.14	49.14	49.14	2260000	49.14	0.858374
1956-07-17	49.31	49.31	49.31	49.31	2520000	49.31	0.345353
1956-07-18	49.3	49.3	49.3	49.3	2530000	49.3	-0.0202819
1956-07-19	49.32	49.32	49.32	49.32	1950000	49.32	0.0405597
1956-07-20	49.35	49.35	49.35	49.35	2020000	49.35	0.0608088
1956-07-23	49.33	49.33	49.33	49.33	1970000	49.33	-0.0405351
1956-07-24	49.33	49.33	49.33	49.33	2040000	49.33	0
1956-07-25	49.44	49.44	49.44	49.44	2220000	49.44	0.22274
1956-07-26	49.48	49.48	49.48	49.48	2060000	49.48	0.0808734
1956-07-27	49.08	49.08	49.08	49.08	2240000	49.08	-0.811693
1956-07-30	49	49	49	49	2100000	49	-0.163132
1956-07-31	49.39	49.39	49.39	49.39	2520000	49.39	0.792768
1956-08-01	49.62	49.62	49.62	49.62	2230000	49.62	0.4646
1956-08-02	49.64	49.64	49.64	49.64	2530000	49.64	0.0402982
1956-08-03	49.64	49.64	49.64	49.64	2210000	49.64	0
1956-08-06	48.96	48.96	48.96	48.96	2280000	48.96	-1.37933
1956-08-07	49.16	49.16	49.16	49.16	2180000	49.16	0.407665
1956-08-08	49.36	49.36	49.36	49.36	2480000	49.36	0.406009
1956-08-09	49.32	49.32	49.32	49.32	2550000	49.32	-0.0810701
1956-08-10	49.09	49.09	49.09	49.09	2040000	49.09	-0.467433
1956-08-13	48.58	48.58	48.58	48.58	1730000	48.58	-1.04434
1956-08-14	48	48	48	48	1790000	48	-1.20109
1956-08-15	48.99	48.99	48.99	48.99	2000000	48.99	2.04152
1956-08-16	48.88	48.88	48.88	48.88	1790000	48.88	-0.224788
1956-08-17	48.82	48.82	48.82	48.82	1720000	48.82	-0.122825
1956-08-20	48.25	48.25	48.25	48.25	1770000	48.25	-1.17442
1956-08-21	47.89	47.89	47.89	47.89	2440000	47.89	-0.748911
1956-08-22	47.42	47.42	47.42	47.42	1570000	47.42	-0.986263
1956-08-23	48	48	48	48	1590000	48	1.21569
1956-08-24	47.95	47.95	47.95	47.95	1530000	47.95	-0.104221
1956-08-27	47.66	47.66	47.66	47.66	1420000	47.66	-0.606633
1956-08-28	47.57	47.57	47.57	47.57	1400000	47.57	-0.189016
1956-08-29	47.36	47.36	47.36	47.36	1530000	47.36	-0.442432
1956-08-30	46.94	46.94	46.94	46.94	2050000	46.94	-0.89078
1956-08-31	47.51	47.51	47.51	47.51	1620000	47.51	1.207
1956-09-04	47.89	47.89	47.89	47.89	1790000	47.89	0.79665
1956-09-05	48.02	48.02	48.02	48.02	2130000	48.02	0.271088
1956-09-06	48.1	48.1	48.1	48.1	1550000	48.1	0.166459
1956-09-07	47.81	47.81	47.81	47.81	1690000	47.81	-0.604735
1956-09-10	47.56	47.56	47.56	47.56	1860000	47.56	-0.524275
1956-09-11	47.38	47.38	47.38	47.38	1920000	47.38	-0.379187
1956-09-12	47.05	47.05	47.05	47.05	1930000	47.05	-0.698933
1956-09-13	46.09	46.09	46.09	46.09	2000000	46.09	-2.06149
1956-09-14	47.21	47.21	47.21	47.21	2110000	47.21	2.40097
1956-09-17	47.1	47.1	47.1	47.1	1940000	47.1	-0.233273
1956-09-18	46.79	46.79	46.79	46.79	2200000	46.79	-0.66035
1956-09-19	46.24	46.24	46.24	46.24	2040000	46.24	-1.18243
1956-09-20	46.21	46.21	46.21	46.21	2150000	46.21	-0.0648999
1956-09-21	46.58	46.58	46.58	46.58	2110000	46.58	0.797504
1956-09-24	46.4	46.4	46.4	46.4	1840000	46.4	-0.387181
1956-09-25	45.75	45.75	45.75	45.75	2100000	45.75	-1.41077
1956-09-26	45.82	45.82	45.82	45.82	2370000	45.82	0.152889
1956-09-27	45.6	45.6	45.6	45.6	1770000	45.6	-0.481296
1956-09-28	45.35	45.35	45.35	45.35	1720000	45.35	-0.549754
1956-10-01	44.7	44.7	44.7	44.7	2600000	44.7	-1.44367
1956-10-02	45.52	45.52	45.52	45.52	2400000	45.52	1.81783
1956-10-03	46.28	46.28	46.28	46.28	2180000	46.28	1.65581
1956-10-04	46.29	46.29	46.29	46.29	1600000	46.29	0.0216053
1956-10-05	46.45	46.45	46.45	46.45	1580000	46.45	0.345051
1956-10-08	46.43	46.43	46.43	46.43	1450000	46.43	-0.0430663
1956-10-09	46.2	46.2	46.2	46.2	1220000	46.2	-0.4966
1956-10-10	46.84	46.84	46.84	46.84	1620000	46.84	1.37577
1956-10-11	46.81	46.81	46.81	46.81	1760000	46.81	-0.0640683
1956-10-12	47	47	47	47	1330000	47	0.405075
1956-10-15	46.86	46.86	46.86	46.86	1610000	46.86	-0.298317
1956-10-16	46.62	46.62	46.62	46.62	1580000	46.62	-0.51348
1956-10-17	46.26	46.26	46.26	46.26	1640000	46.26	-0.775198
1956-10-18	46.34	46.34	46.34	46.34	1640000	46.34	0.172786
1956-10-19	46.24	46.24	46.24	46.24	1720000	46.24	-0.216029
1956-10-22	46.23	46.23	46.23	46.23	1430000	46.23	-0.0216286
1956-10-23	46.12	46.12	46.12	46.12	1390000	46.12	-0.238224
1956-10-24	45.93	45.93	45.93	45.93	1640000	45.93	-0.41282
1956-10-25	45.85	45.85	45.85	45.85	1580000	45.85	-0.17433
1956-10-26	46.27	46.27	46.27	46.27	1800000	46.27	0.91186
1956-10-29	46.4	46.4	46.4	46.4	2420000	46.4	0.280566
1956-10-30	46.37	46.37	46.37	46.37	1830000	46.37	-0.0646761
1956-10-31	45.58	45.58	45.58	45.58	2280000	45.58	-1.71837
1956-11-01	46.52	46.52	46.52	46.52	1890000	46.52	2.04133
1956-11-02	46.98	46.98	46.98	46.98	2180000	46.98	0.983965
1956-11-05	47.6	47.6	47.6	47.6	2830000	47.6	1.31108
1956-11-07	47.11	47.11	47.11	47.11	2650000	47.11	-1.03475
1956-11-08	46.73	46.73	46.73	46.73	1970000	46.73	-0.809894
1956-11-09	46.34	46.34	46.34	46.34	1690000	46.34	-0.838084
1956-11-12	46.49	46.49	46.49	46.49	1600000	46.49	0.323172
1956-11-13	46.27	46.27	46.27	46.27	2140000	46.27	-0.474343
1956-11-14	46.01	46.01	46.01	46.01	2290000	46.01	-0.563504
1956-11-15	45.72	45.72	45.72	45.72	2210000	45.72	-0.632293
1956-11-16	45.74	45.74	45.74	45.74	1820000	45.74	0.043735
1956-11-19	45.29	45.29	45.29	45.29	2560000	45.29	-0.988693
1956-11-20	44.89	44.89	44.89	44.89	2240000	44.89	-0.88712
1956-11-21	44.67	44.67	44.67	44.67	2310000	44.67	-0.491292
1956-11-23	45.14	45.14	45.14	45.14	1880000	45.14	1.04666
1956-11-26	44.87	44.87	44.87	44.87	2230000	44.87	-0.599935
1956-11-27	44.91	44.91	44.91	44.91	2130000	44.91	0.0891067
1956-11-28	44.43	44.43	44.43	44.43	2190000	44.43	-1.07456
1956-11-29	44.38	44.38	44.38	44.38	2440000	44.38	-0.1126
1956-11-30	45.08	45.08	45.08	45.08	2300000	45.08	1.56498
1956-12-03	45.98	45.98	45.98	45.98	2570000	45.98	1.97678
1956-12-04	45.84	45.84	45.84	45.84	2180000	45.84	-0.304945
1956-12-05	46.39	46.39	46.39	46.39	2360000	46.39	1.19268
1956-12-06	46.81	46.81	46.81	46.81	2470000	46.81	0.901294
1956-12-07	47.04	47.04	47.04	47.04	2400000	47.04	0.490145
1956-12-10	46.8	46.8	46.8	46.8	2600000	46.8	-0.51151
1956-12-11	46.48	46.48	46.48	46.48	2210000	46.48	-0.686109
1956-12-12	46.13	46.13	46.13	46.13	2180000	46.13	-0.755861
1956-12-13	46.5	46.5	46.5	46.5	2370000	46.5	0.798882
1956-12-14	46.54	46.54	46.54	46.54	2450000	46.54	0.0859845
1956-12-17	46.54	46.54	46.54	46.54	2500000	46.54	0
1956-12-18	46.54	46.54	46.54	46.54	2370000	46.54	0
1956-12-19	46.43	46.43	46.43	46.43	1900000	46.43	-0.236636
1956-12-20	46.07	46.07	46.07	46.07	2060000	46.07	-0.778382
1956-12-21	46.37	46.37	46.37	46.37	2380000	46.37	0.649072
1956-12-26	46.39	46.39	46.39	46.39	2440000	46.39	0.043122
1956-12-27	46.35	46.35	46.35	46.35	2420000	46.35	-0.0862627
1956-12-28	46.56	46.56	46.56	46.56	2790000	46.56	0.452051
1956-12-31	46.67	46.67	46.67	46.67	3680000	46.67	0.235976
1957-01-02	46.2	46.2	46.2	46.2	1960000	46.2	-1.01218
1957-01-03	46.6	46.6	46.6	46.6	2260000	46.6	0.862074
1957-01-04	46.66	46.66	46.66	46.66	2710000	46.66	0.128673
1957-01-07	46.42	46.42	46.42	46.42	2500000	46.42	-0.515687
1957-01-08	46.25	46.25	46.25	46.25	2230000	46.25	-0.366894
1957-01-09	46.16	46.16	46.16	46.16	2330000	46.16	-0.194784
1957-01-10	46.27	46.27	46.27	46.27	2470000	46.27	0.238018
1957-01-11	46.18	46.18	46.18	46.18	2340000	46.18	-0.1947
1957-01-14	45.86	45.86	45.86	45.86	2350000	45.86	-0.695353
1957-01-15	45.18	45.18	45.18	45.18	2370000	45.18	-1.49388
1957-01-16	45.23	45.23	45.23	45.23	2210000	45.23	0.110607
1957-01-17	45.22	45.22	45.22	45.22	2140000	45.22	-0.0221117
1957-01-18	44.64	44.64	44.64	44.64	2400000	44.64	-1.29091
1957-01-21	44.4	44.4	44.4	44.4	2740000	44.4	-0.539085
1957-01-22	44.53	44.53	44.53	44.53	1920000	44.53	0.292365
1957-01-23	44.87	44.87	44.87	44.87	1920000	44.87	0.76063
1957-01-24	45.03	45.03	45.03	45.03	1910000	45.03	0.355951
1957-01-25	44.82	44.82	44.82	44.82	2010000	44.82	-0.467447
1957-01-28	44.49	44.49	44.49	44.49	1700000	44.49	-0.739002
1957-01-29	44.71	44.71	44.71	44.71	1800000	44.71	0.493275
1957-01-30	44.91	44.91	44.91	44.91	1950000	44.91	0.44633
1957-01-31	44.72	44.72	44.72	44.72	1920000	44.72	-0.423966
1957-02-01	44.62	44.62	44.62	44.62	1680000	44.62	-0.223864
1957-02-04	44.53	44.53	44.53	44.53	1750000	44.53	-0.201907
1957-02-05	43.89	43.89	43.89	43.89	2610000	43.89	-1.44766
1957-02-06	43.82	43.82	43.82	43.82	2110000	43.82	-0.159617
1957-02-07	43.62	43.62	43.62	43.62	1840000	43.62	-0.457457
1957-02-08	43.32	43.32	43.32	43.32	2120000	43.32	-0.690134
1957-02-11	42.57	42.57	42.57	42.57	2740000	42.57	-1.74646
1957-02-12	42.39	42.39	42.39	42.39	2550000	42.39	-0.423729
1957-02-13	43.04	43.04	43.04	43.04	2380000	43.04	1.52174
1957-02-14	42.99	42.99	42.99	42.99	2220000	42.99	-0.116239
1957-02-15	43.51	43.51	43.51	43.51	2060000	43.51	1.20233
1957-02-18	43.46	43.46	43.46	43.46	1800000	43.46	-0.114982
1957-02-19	43.49	43.49	43.49	43.49	1670000	43.49	0.0690052
1957-02-20	43.63	43.63	43.63	43.63	1790000	43.63	0.321396
1957-02-21	43.48	43.48	43.48	43.48	1680000	43.48	-0.344392
1957-02-25	43.38	43.38	43.38	43.38	1710000	43.38	-0.230256
1957-02-26	43.45	43.45	43.45	43.45	1580000	43.45	0.161235
1957-02-27	43.41	43.41	43.41	43.41	1620000	43.41	-0.0921022
1957-02-28	43.26	43.26	43.26	43.26	1620000	43.26	-0.346141
1957-03-01	43.74	43.74	43.74	43.74	1700000	43.74	1.10346
1957-03-04	44.06	44.06	44.06	44.06	1890000	44.06	0.728933
1957-03-05	44.22	44.22	44.22	44.22	1860000	44.22	0.362483
1957-03-06	44.23	44.23	44.23	44.23	1840000	44.23	0.0226116
1957-03-07	44.21	44.21	44.21	44.21	1830000	44.21	-0.0452284
1957-03-08	44.07	44.07	44.07	44.07	1630000	44.07	-0.317173
1957-03-11	43.78	43.78	43.78	43.78	1650000	43.78	-0.660219
1957-03-12	43.75	43.75	43.75	43.75	1600000	43.75	-0.0685479
1957-03-13	44.04	44.04	44.04	44.04	1840000	44.04	0.66067
1957-03-14	44.07	44.07	44.07	44.07	1580000	44.07	0.0680967
1957-03-15	44.05	44.05	44.05	44.05	1600000	44.05	-0.0453926
1957-03-18	43.85	43.85	43.85	43.85	1450000	43.85	-0.455063
1957-03-19	44.04	44.04	44.04	44.04	1540000	44.04	0.432359
1957-03-20	44.1	44.1	44.1	44.1	1830000	44.1	0.136147
1957-03-21	44.11	44.11	44.11	44.11	1630000	44.11	0.0226732
1957-03-22	44.06	44.06	44.06	44.06	1610000	44.06	-0.113417
1957-03-25	43.88	43.88	43.88	43.88	1590000	43.88	-0.409371
1957-03-26	43.91	43.91	43.91	43.91	1660000	43.91	0.0683449
1957-03-27	44.09	44.09	44.09	44.09	1710000	44.09	0.409091
1957-03-28	44.18	44.18	44.18	44.18	1930000	44.18	0.20392
1957-03-29	44.11	44.11	44.11	44.11	1650000	44.11	-0.158568
1957-04-01	44.14	44.14	44.14	44.14	1620000	44.14	0.0679887
1957-04-02	44.42	44.42	44.42	44.42	2300000	44.42	0.632342
1957-04-03	44.54	44.54	44.54	44.54	2160000	44.54	0.269784
1957-04-04	44.44	44.44	44.44	44.44	1820000	44.44	-0.22477
1957-04-05	44.49	44.49	44.49	44.49	1830000	44.49	0.112448
1957-04-08	44.39	44.39	44.39	44.39	1950000	44.39	-0.225023
1957-04-09	44.79	44.79	44.79	44.79	2400000	44.79	0.897068
1957-04-10	44.98	44.98	44.98	44.98	2920000	44.98	0.423305
1957-04-11	44.98	44.98	44.98	44.98	2350000	44.98	0
1957-04-12	44.98	44.98	44.98	44.98	2370000	44.98	0
1957-04-15	44.95	44.95	44.95	44.95	2010000	44.95	-0.0667186
1957-04-16	45.02	45.02	45.02	45.02	1890000	45.02	0.155607
1957-04-17	45.08	45.08	45.08	45.08	2290000	45.08	0.133185
1957-04-18	45.41	45.41	45.41	45.41	2480000	45.41	0.729366
1957-04-22	45.48	45.48	45.48	45.48	2560000	45.48	0.154032
1957-04-23	45.65	45.65	45.65	45.65	2840000	45.65	0.373094
1957-04-24	45.72	45.72	45.72	45.72	2990000	45.72	0.153223
1957-04-25	45.56	45.56	45.56	45.56	2640000	45.56	-0.35057
1957-04-26	45.5	45.5	45.5	45.5	2380000	45.5	-0.131781
1957-04-29	45.73	45.73	45.73	45.73	2290000	45.73	0.504221
1957-04-30	45.74	45.74	45.74	45.74	2200000	45.74	0.0218651
1957-05-01	46.02	46.02	46.02	46.02	2310000	46.02	0.61029
1957-05-02	46.39	46.39	46.39	46.39	2860000	46.39	0.800783
1957-05-03	46.34	46.34	46.34	46.34	2390000	46.34	-0.10784
1957-05-06	46.27	46.27	46.27	46.27	2210000	46.27	-0.151172
1957-05-07	46.13	46.13	46.13	46.13	2300000	46.13	-0.303031
1957-05-08	46.31	46.31	46.31	46.31	2590000	46.31	0.389442
1957-05-09	46.36	46.36	46.36	46.36	2520000	46.36	0.10791
1957-05-10	46.59	46.59	46.59	46.59	2430000	46.59	0.494891
1957-05-13	46.88	46.88	46.88	46.88	2720000	46.88	0.620522
1957-05-14	46.67	46.67	46.67	46.67	2580000	46.67	-0.448959
1957-05-15	46.83	46.83	46.83	46.83	2590000	46.83	0.342246
1957-05-16	47.02	47.02	47.02	47.02	2690000	47.02	0.404902
1957-05-17	47.15	47.15	47.15	47.15	2510000	47.15	0.276097
1957-05-20	47.35	47.35	47.35	47.35	2300000	47.35	0.423281
1957-05-21	47.33	47.33	47.33	47.33	2370000	47.33	-0.0422476
1957-05-22	47.14	47.14	47.14	47.14	2060000	47.14	-0.402245
1957-05-23	47.15	47.15	47.15	47.15	2110000	47.15	0.0212112
1957-05-24	47.21	47.21	47.21	47.21	2340000	47.21	0.127173
1957-05-27	46.78	46.78	46.78	46.78	2290000	46.78	-0.914997
1957-05-28	46.69	46.69	46.69	46.69	2070000	46.69	-0.192575
1957-05-29	47.11	47.11	47.11	47.11	2270000	47.11	0.895528
1957-05-31	47.43	47.43	47.43	47.43	2050000	47.43	0.676965
1957-06-03	47.37	47.37	47.37	47.37	2050000	47.37	-0.126582
1957-06-04	47.28	47.28	47.28	47.28	2200000	47.28	-0.190174
1957-06-05	47.27	47.27	47.27	47.27	1940000	47.27	-0.0211528
1957-06-06	47.8	47.8	47.8	47.8	2300000	47.8	1.11498
1957-06-07	47.85	47.85	47.85	47.85	2380000	47.85	0.104548
1957-06-10	47.9	47.9	47.9	47.9	2050000	47.9	0.104439
1957-06-11	47.94	47.94	47.94	47.94	2850000	47.94	0.0834725
1957-06-12	48.05	48.05	48.05	48.05	2600000	48.05	0.229191
1957-06-13	48.14	48.14	48.14	48.14	2630000	48.14	0.18713
1957-06-14	48.15	48.15	48.15	48.15	2090000	48.15	0.0207706
1957-06-17	48.24	48.24	48.24	48.24	2220000	48.24	0.186741
1957-06-18	48.04	48.04	48.04	48.04	2440000	48.04	-0.415456
1957-06-19	47.72	47.72	47.72	47.72	2220000	47.72	-0.66834
1957-06-20	47.43	47.43	47.43	47.43	2050000	47.43	-0.609566
1957-06-21	47.15	47.15	47.15	47.15	1970000	47.15	-0.592093
1957-06-24	46.78	46.78	46.78	46.78	2040000	46.78	-0.787825
1957-06-25	47.15	47.15	47.15	47.15	2000000	47.15	0.787825
1957-06-26	47.09	47.09	47.09	47.09	1870000	47.09	-0.127334
1957-06-27	47.26	47.26	47.26	47.26	1800000	47.26	0.360361
1957-06-28	47.37	47.37	47.37	47.37	1770000	47.37	0.232485
1957-07-01	47.43	47.43	47.43	47.43	1840000	47.43	0.126582
1957-07-02	47.9	47.9	47.9	47.9	2450000	47.9	0.986056
1957-07-03	48.46	48.46	48.46	48.46	2720000	48.46	1.16232
1957-07-05	48.69	48.69	48.69	48.69	2240000	48.69	0.473495
1957-07-08	48.9	48.9	48.9	48.9	2840000	48.9	0.430373
1957-07-09	48.9	48.9	48.9	48.9	2450000	48.9	0
1957-07-10	49	49	49	49	2880000	49	0.20429
1957-07-11	48.86	48.86	48.86	48.86	2830000	48.86	-0.286123
1957-07-12	49.08	49.08	49.08	49.08	2240000	49.08	0.449255
1957-07-15	49.13	49.13	49.13	49.13	2480000	49.13	0.101823
1957-07-16	48.88	48.88	48.88	48.88	2510000	48.88	-0.510153
1957-07-17	48.58	48.58	48.58	48.58	2060000	48.58	-0.615639
1957-07-18	48.53	48.53	48.53	48.53	2130000	48.53	-0.102976
1957-07-19	48.58	48.58	48.58	48.58	1930000	48.58	0.102976
1957-07-22	48.47	48.47	48.47	48.47	1950000	48.47	-0.226687
1957-07-23	48.56	48.56	48.56	48.56	1840000	48.56	0.18551
1957-07-24	48.61	48.61	48.61	48.61	1730000	48.61	0.102912
1957-07-25	48.61	48.61	48.61	48.61	1800000	48.61	0
1957-07-26	48.45	48.45	48.45	48.45	1710000	48.45	-0.329693
1957-07-29	47.92	47.92	47.92	47.92	1990000	47.92	-1.09994
1957-07-30	47.92	47.92	47.92	47.92	1780000	47.92	0
1957-07-31	47.91	47.91	47.91	47.91	1830000	47.91	-0.0208703
1957-08-01	47.79	47.79	47.79	47.79	1660000	47.79	-0.250784
1957-08-02	47.68	47.68	47.68	47.68	1610000	47.68	-0.230439
1957-08-05	47.26	47.26	47.26	47.26	1790000	47.26	-0.884775
1957-08-06	46.67	46.67	46.67	46.67	1910000	46.67	-1.25627
1957-08-07	47.03	47.03	47.03	47.03	2460000	47.03	0.768414
1957-08-08	46.9	46.9	46.9	46.9	1690000	46.9	-0.276802
1957-08-09	46.92	46.92	46.92	46.92	1570000	46.92	0.0426348
1957-08-12	46.33	46.33	46.33	46.33	1650000	46.33	-1.26543
1957-08-13	46.3	46.3	46.3	46.3	1580000	46.3	-0.0647738
1957-08-14	45.73	45.73	45.73	45.73	2040000	45.73	-1.23874
1957-08-15	45.75	45.75	45.75	45.75	2040000	45.75	0.0437254
1957-08-16	45.83	45.83	45.83	45.83	1470000	45.83	0.174711
1957-08-19	44.91	44.91	44.91	44.91	2040000	44.91	-2.02784
1957-08-20	45.29	45.29	45.29	45.29	2700000	45.29	0.842577
1957-08-21	45.49	45.49	45.49	45.49	1720000	45.49	0.440626
1957-08-22	45.16	45.16	45.16	45.16	1500000	45.16	-0.728078
1957-08-23	44.51	44.51	44.51	44.51	1960000	44.51	-1.44979
1957-08-26	43.89	43.89	43.89	43.89	2680000	43.89	-1.40274
1957-08-27	44.61	44.61	44.61	44.61	2250000	44.61	1.62715
1957-08-28	44.64	44.64	44.64	44.64	1840000	44.64	0.0672269
1957-08-29	44.46	44.46	44.46	44.46	1630000	44.46	-0.404041
1957-08-30	45.22	45.22	45.22	45.22	1600000	45.22	1.69496
1957-09-03	45.44	45.44	45.44	45.44	1490000	45.44	0.485331
1957-09-04	45.05	45.05	45.05	45.05	1260000	45.05	-0.861979
1957-09-05	44.82	44.82	44.82	44.82	1420000	44.82	-0.511852
1957-09-06	44.68	44.68	44.68	44.68	1320000	44.68	-0.312849
1957-09-09	44.28	44.28	44.28	44.28	1420000	44.28	-0.899287
1957-09-10	43.87	43.87	43.87	43.87	1870000	43.87	-0.930239
1957-09-11	44.26	44.26	44.26	44.26	2130000	44.26	0.885062
1957-09-12	44.82	44.82	44.82	44.82	2010000	44.82	1.25731
1957-09-13	44.8	44.8	44.8	44.8	1620000	44.8	-0.0446329
1957-09-16	44.58	44.58	44.58	44.58	1290000	44.58	-0.492281
1957-09-17	44.64	44.64	44.64	44.64	1490000	44.64	0.134499
1957-09-18	44.69	44.69	44.69	44.69	1540000	44.69	0.111944
1957-09-19	44.4	44.4	44.4	44.4	1520000	44.4	-0.651029
1957-09-20	43.69	43.69	43.69	43.69	2340000	43.69	-1.61202
1957-09-23	42.69	42.69	42.69	42.69	3160000	42.69	-2.31545
1957-09-24	42.98	42.98	42.98	42.98	2840000	42.98	0.677019
1957-09-25	42.98	42.98	42.98	42.98	2770000	42.98	0
1957-09-26	42.57	42.57	42.57	42.57	2130000	42.57	-0.958511
1957-09-27	42.55	42.55	42.55	42.55	1750000	42.55	-0.0469925
1957-09-30	42.42	42.42	42.42	42.42	1520000	42.42	-0.305991
1957-10-01	42.76	42.76	42.76	42.76	1680000	42.76	0.798314
1957-10-02	43.1	43.1	43.1	43.1	1760000	43.1	0.791991
1957-10-03	43.14	43.14	43.14	43.14	1590000	43.14	0.0927644
1957-10-04	42.79	42.79	42.79	42.79	1520000	42.79	-0.814621
1957-10-07	42.22	42.22	42.22	42.22	2490000	42.22	-1.34104
1957-10-08	41.95	41.95	41.95	41.95	3190000	41.95	-0.641561
1957-10-09	41.99	41.99	41.99	41.99	2120000	41.99	0.0953062
1957-10-10	40.96	40.96	40.96	40.96	3300000	40.96	-2.48355
1957-10-11	40.94	40.94	40.94	40.94	4460000	40.94	-0.04884
1957-10-14	41.24	41.24	41.24	41.24	2770000	41.24	0.730108
1957-10-15	41.67	41.67	41.67	41.67	2620000	41.67	1.03728
1957-10-16	41.33	41.33	41.33	41.33	2050000	41.33	-0.819282
1957-10-17	40.65	40.65	40.65	40.65	3060000	40.65	-1.65898
1957-10-18	40.33	40.33	40.33	40.33	2670000	40.33	-0.790323
1957-10-21	39.15	39.15	39.15	39.15	4670000	39.15	-2.96952
1957-10-22	38.98	38.98	38.98	38.98	5090000	38.98	-0.435173
1957-10-23	40.73	40.73	40.73	40.73	4600000	40.73	4.39162
1957-10-24	40.71	40.71	40.71	40.71	4030000	40.71	-0.0491159
1957-10-25	40.59	40.59	40.59	40.59	2400000	40.59	-0.295203
1957-10-28	40.42	40.42	40.42	40.42	1800000	40.42	-0.419702
1957-10-29	40.69	40.69	40.69	40.69	1860000	40.69	0.665765
1957-10-30	41.02	41.02	41.02	41.02	2060000	41.02	0.807739
1957-10-31	41.06	41.06	41.06	41.06	2170000	41.06	0.0974659
1957-11-01	40.44	40.44	40.44	40.44	2060000	40.44	-1.5215
1957-11-04	40.37	40.37	40.37	40.37	2380000	40.37	-0.173246
1957-11-06	40.43	40.43	40.43	40.43	2550000	40.43	0.148515
1957-11-07	40.67	40.67	40.67	40.67	2580000	40.67	0.591864
1957-11-08	40.19	40.19	40.19	40.19	2140000	40.19	-1.18725
1957-11-11	40.18	40.18	40.18	40.18	1540000	40.18	-0.0248849
1957-11-12	39.6	39.6	39.6	39.6	2050000	39.6	-1.45402
1957-11-13	39.55	39.55	39.55	39.55	2120000	39.55	-0.126342
1957-11-14	39.44	39.44	39.44	39.44	2450000	39.44	-0.278516
1957-11-15	40.37	40.37	40.37	40.37	3510000	40.37	2.33064
1957-11-18	40.04	40.04	40.04	40.04	2110000	40.04	-0.820798
1957-11-19	39.81	39.81	39.81	39.81	2240000	39.81	-0.576082
1957-11-20	39.92	39.92	39.92	39.92	2400000	39.92	0.275931
1957-11-21	40.48	40.48	40.48	40.48	2900000	40.48	1.39306
1957-11-22	40.87	40.87	40.87	40.87	2850000	40.87	0.958827
1957-11-25	41.18	41.18	41.18	41.18	2600000	41.18	0.75564
1957-11-26	40.09	40.09	40.09	40.09	3650000	40.09	-2.68258
1957-11-27	41.25	41.25	41.25	41.25	3330000	41.25	2.85242
1957-11-29	41.72	41.72	41.72	41.72	2740000	41.72	1.13295
1957-12-02	41.36	41.36	41.36	41.36	2430000	41.36	-0.86664
1957-12-03	41.37	41.37	41.37	41.37	2060000	41.37	0.024175
1957-12-04	41.54	41.54	41.54	41.54	2220000	41.54	0.410084
1957-12-05	41.52	41.52	41.52	41.52	2020000	41.52	-0.048158
1957-12-06	41.31	41.31	41.31	41.31	2350000	41.31	-0.507064
1957-12-09	40.92	40.92	40.92	40.92	2230000	40.92	-0.948566
1957-12-10	40.56	40.56	40.56	40.56	2360000	40.56	-0.883658
1957-12-11	40.51	40.51	40.51	40.51	2240000	40.51	-0.12335
1957-12-12	40.55	40.55	40.55	40.55	2330000	40.55	0.0986923
1957-12-13	40.73	40.73	40.73	40.73	2310000	40.73	0.442914
1957-12-16	40.12	40.12	40.12	40.12	2350000	40.12	-1.509
1957-12-17	39.42	39.42	39.42	39.42	2820000	39.42	-1.76017
1957-12-18	39.38	39.38	39.38	39.38	2750000	39.38	-0.101523
[truncated: 13,628 more rows]
