# Supplementary figures and images for: Time-varying asymmetry and tail thickness in long series of daily financial returns
Source: publisher site journal article supplement (doi:10.1515/snde-2017-0071), 2018-10-02

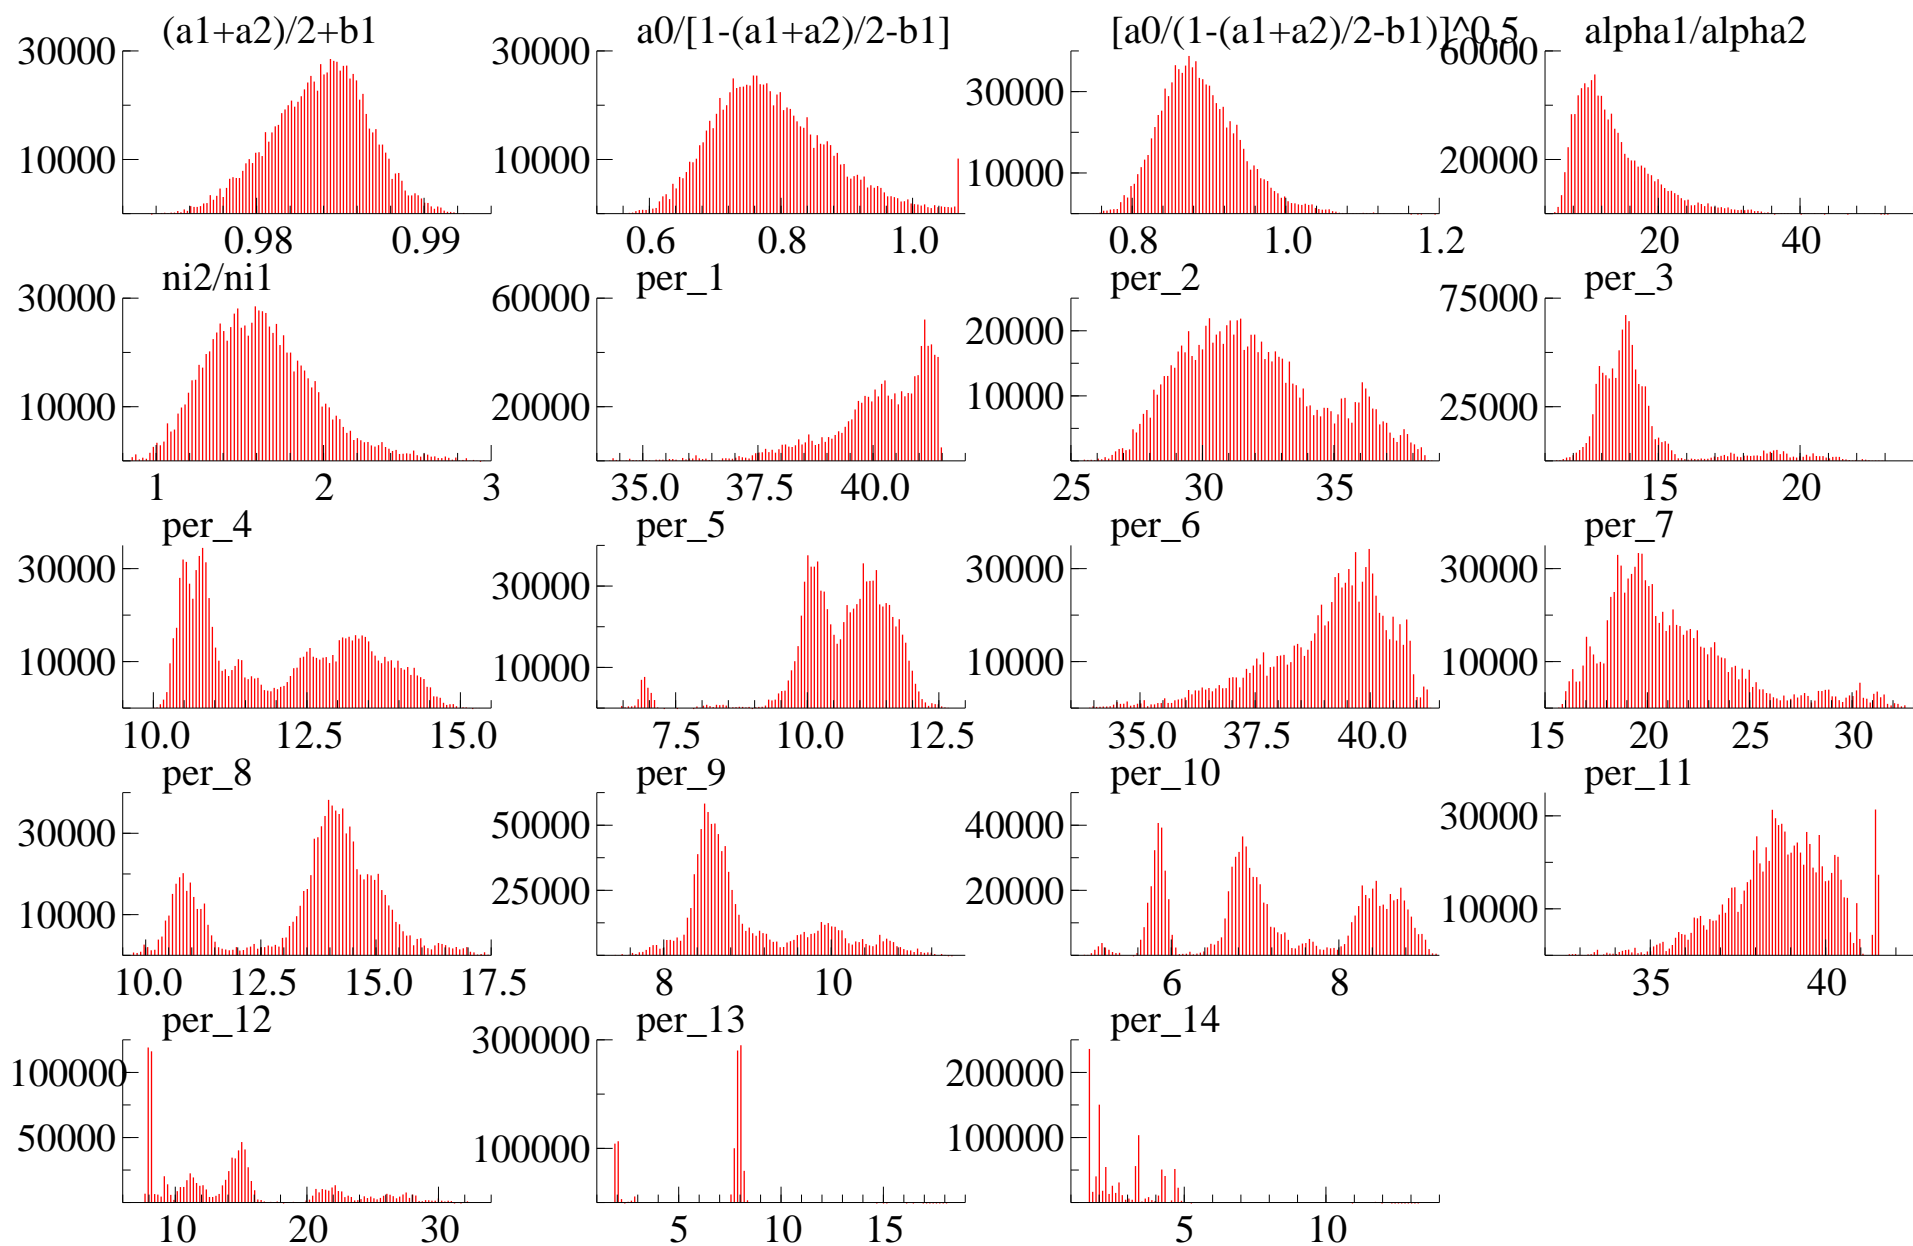

Supplement: Supplementary file 1 [file hist_add.pdf › in_sample/M_1/hist_add.pdf]

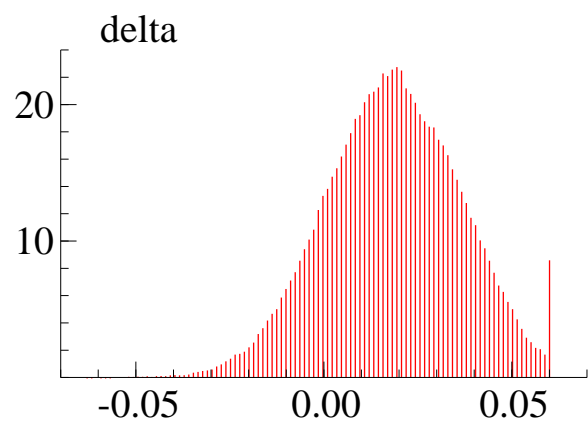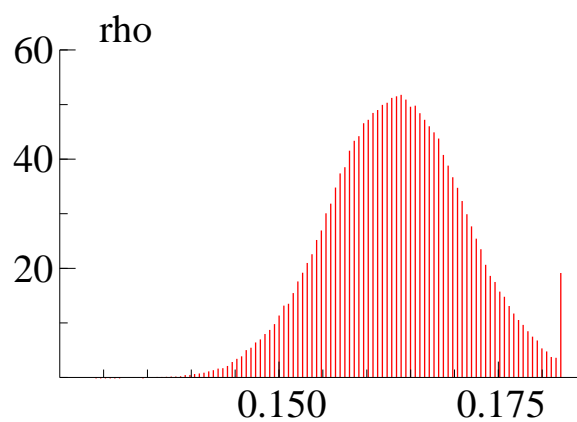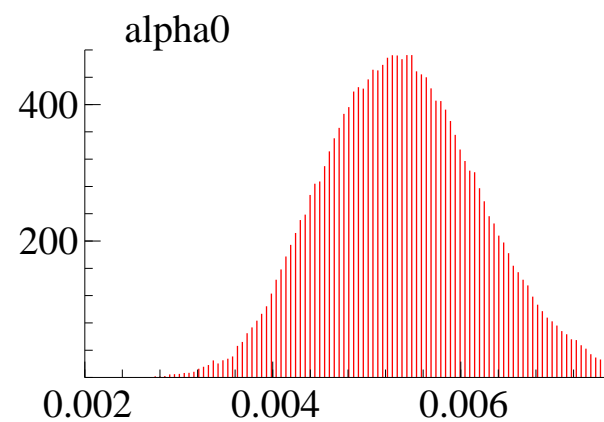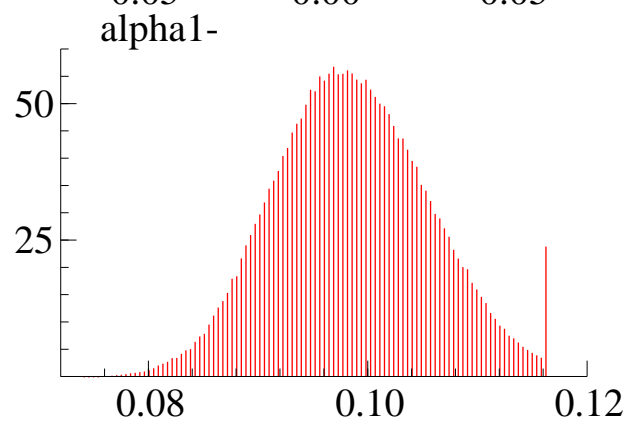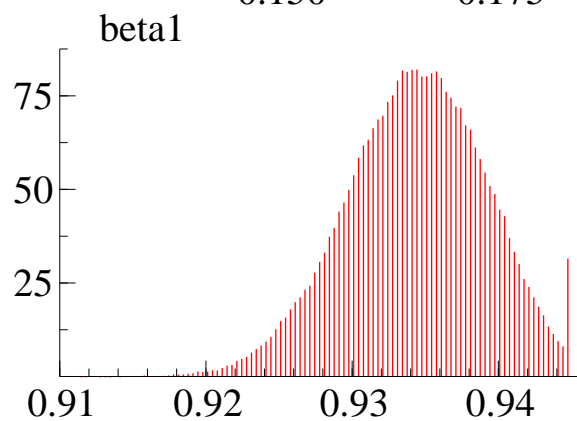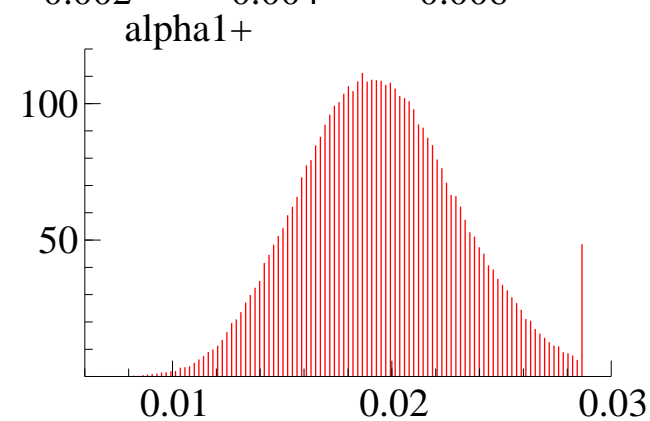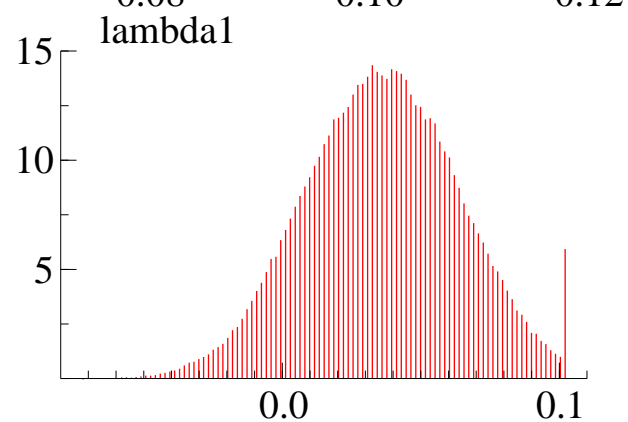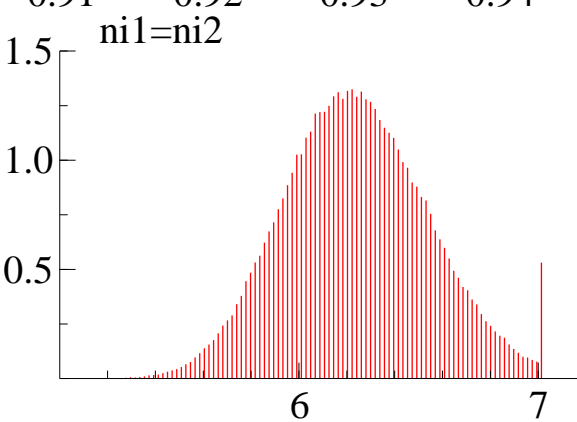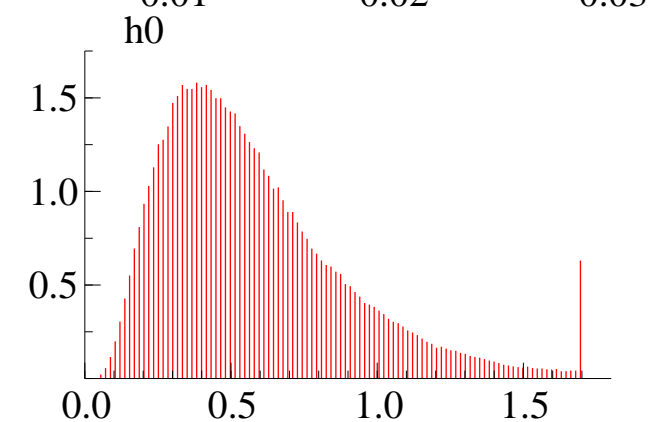

Supplement: Supplementary file 2 [file hist_ip.pdf › in_sample/M_1/hist_ip.pdf]

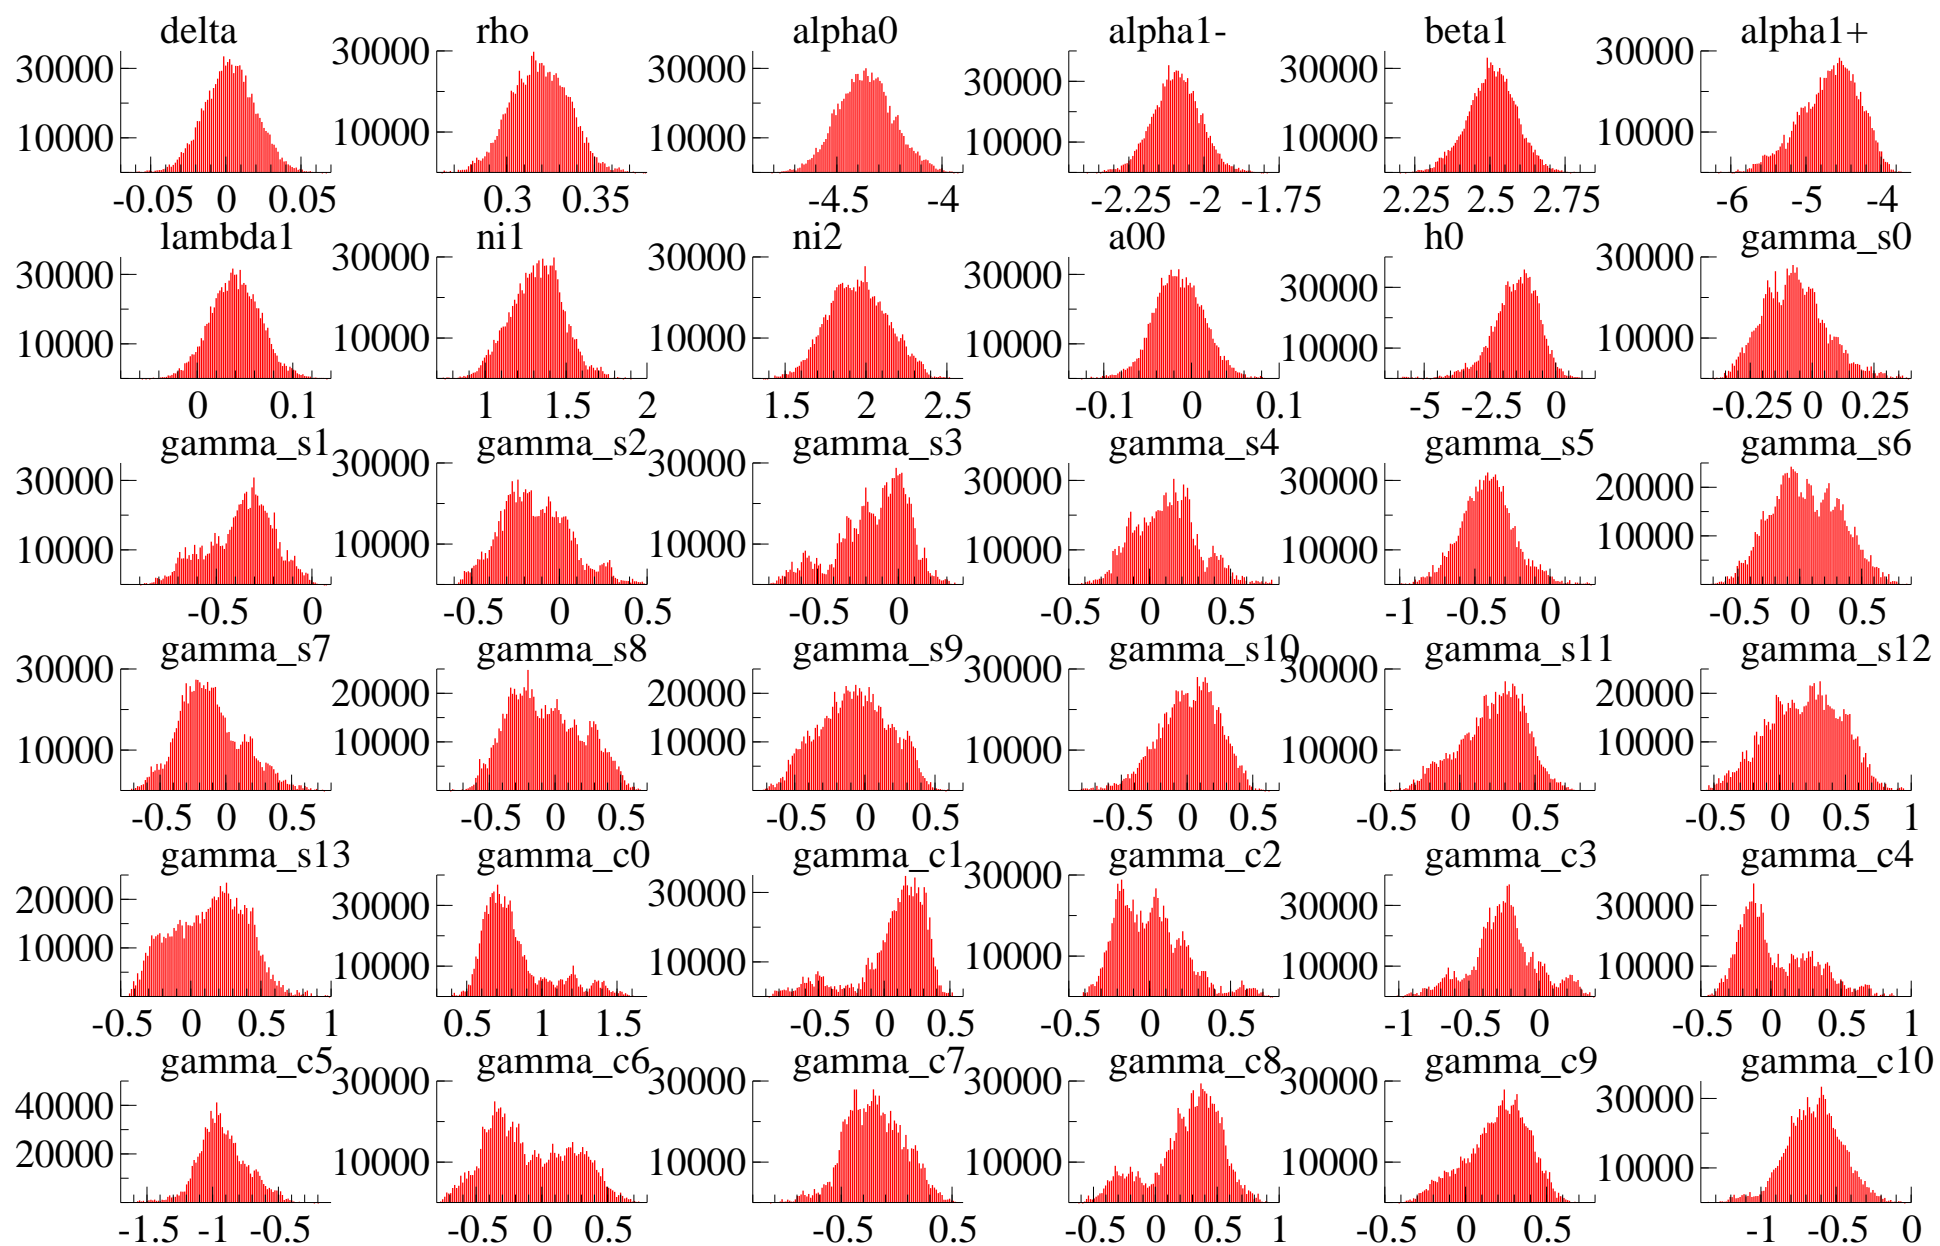

Supplement: Supplementary file 3 [file hist_sp.pdf › in_sample/M_1/hist_sp.pdf]

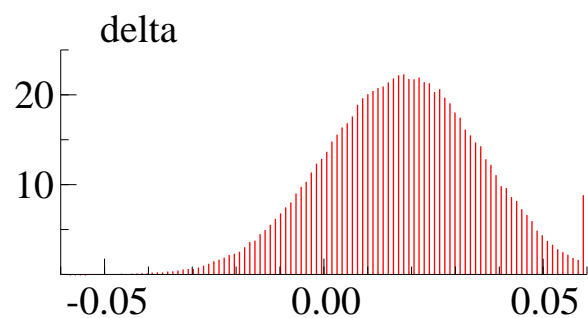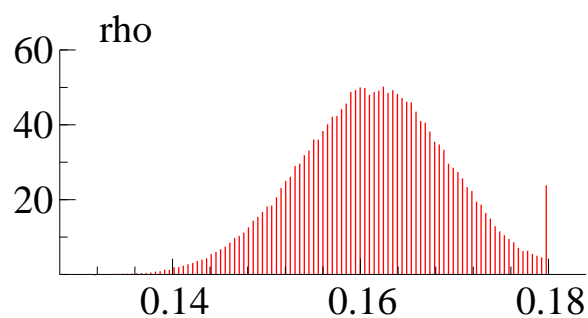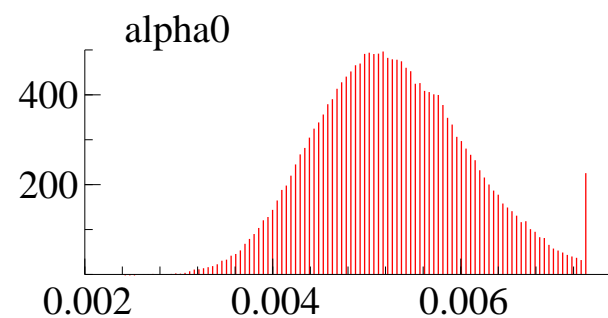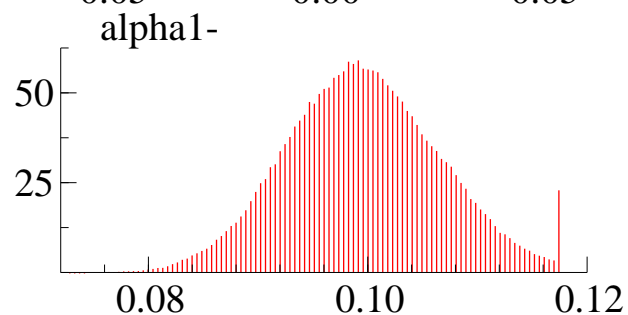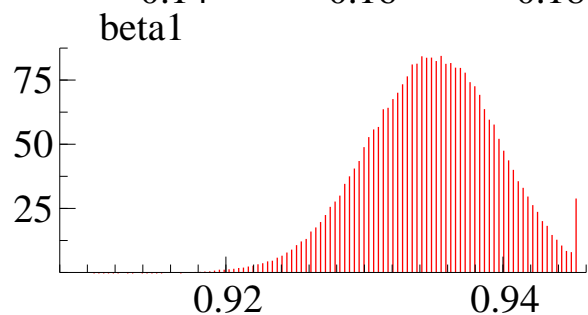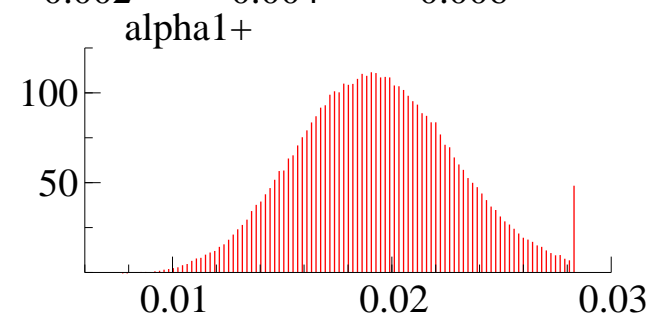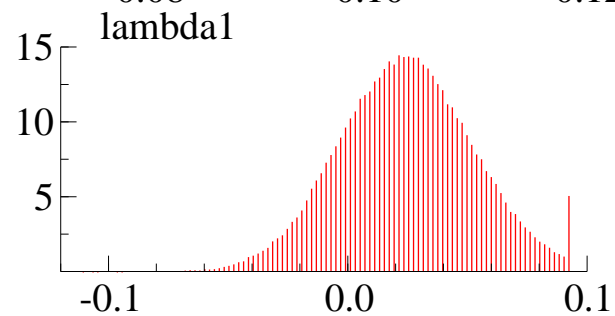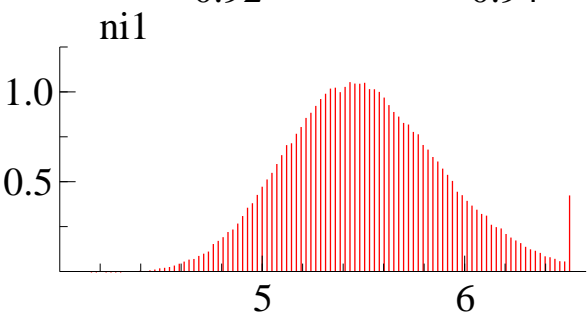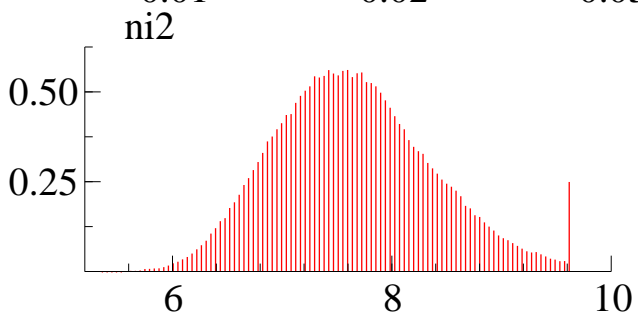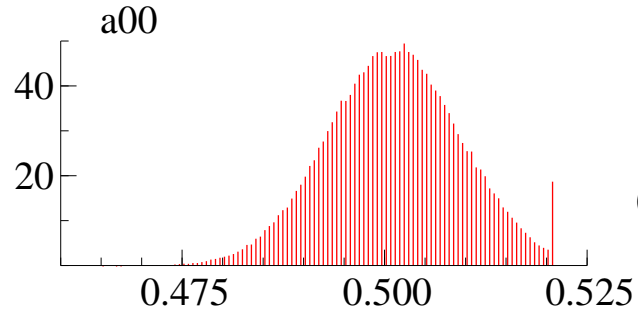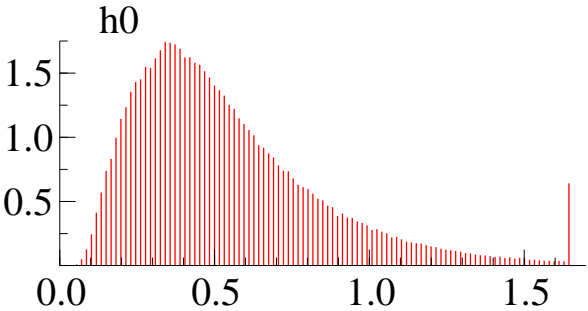

Supplement: Supplementary file 4 [file hist_ip.pdf › in_sample/M_2/hist_ip.pdf]

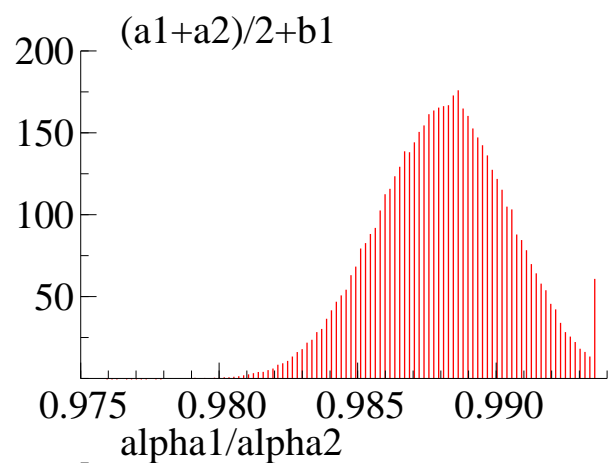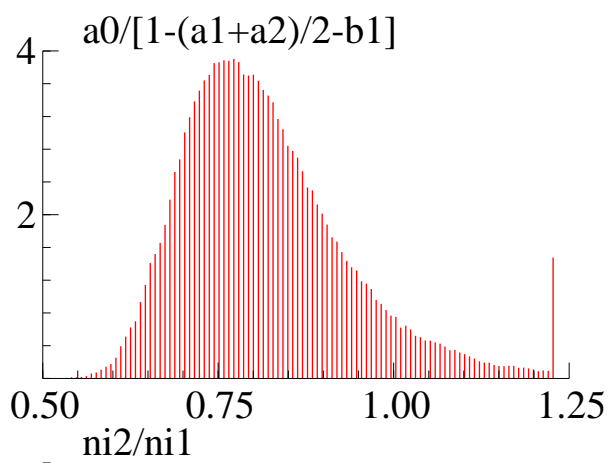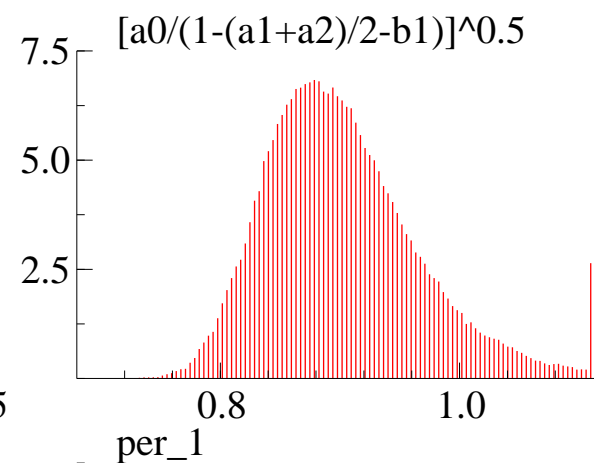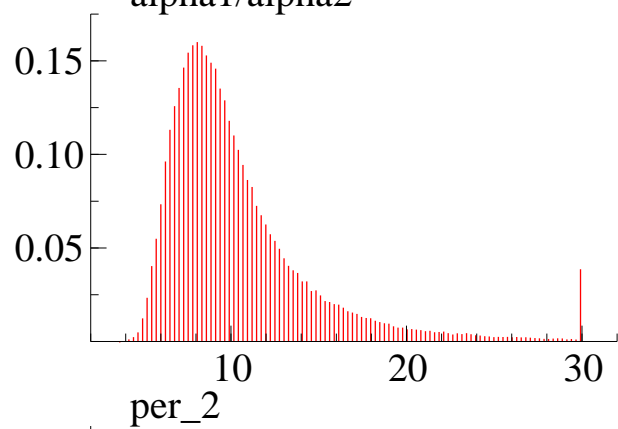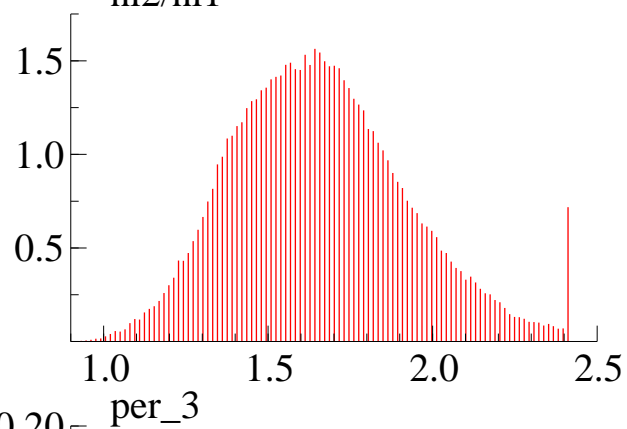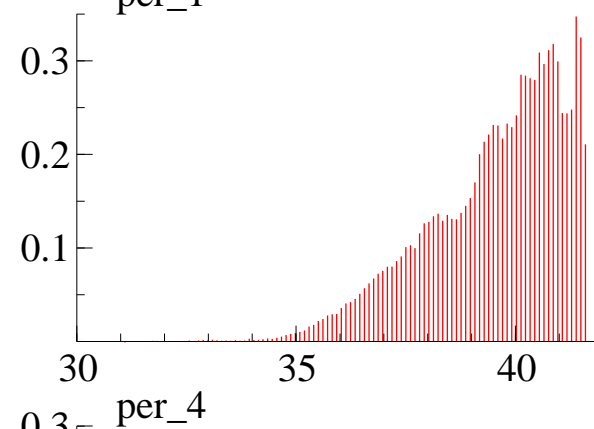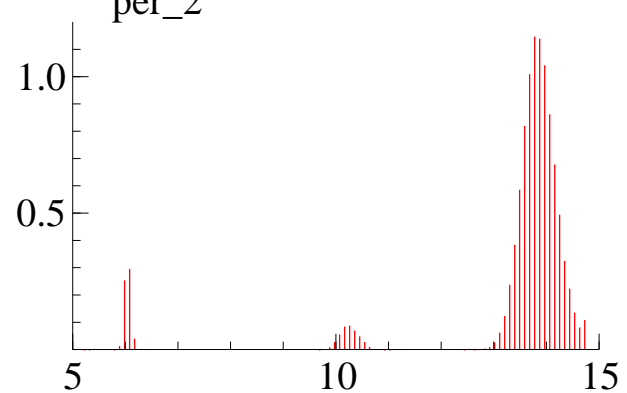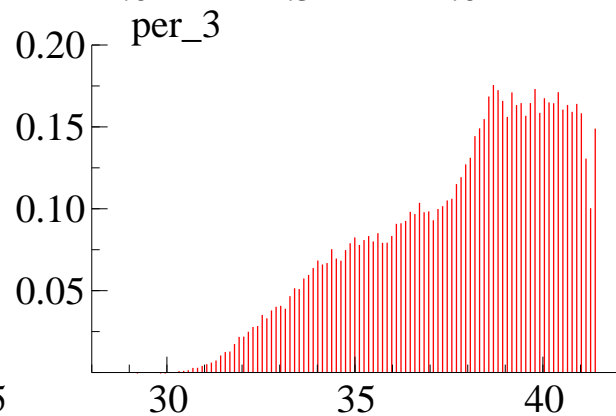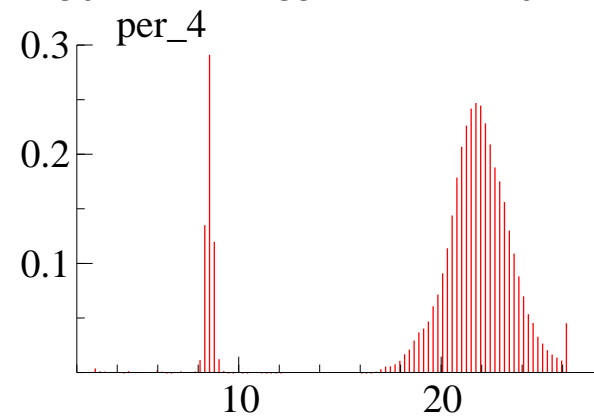

Supplement: Supplementary file 5 [file hist_add.pdf › in_sample/M_3/hist_add.pdf]

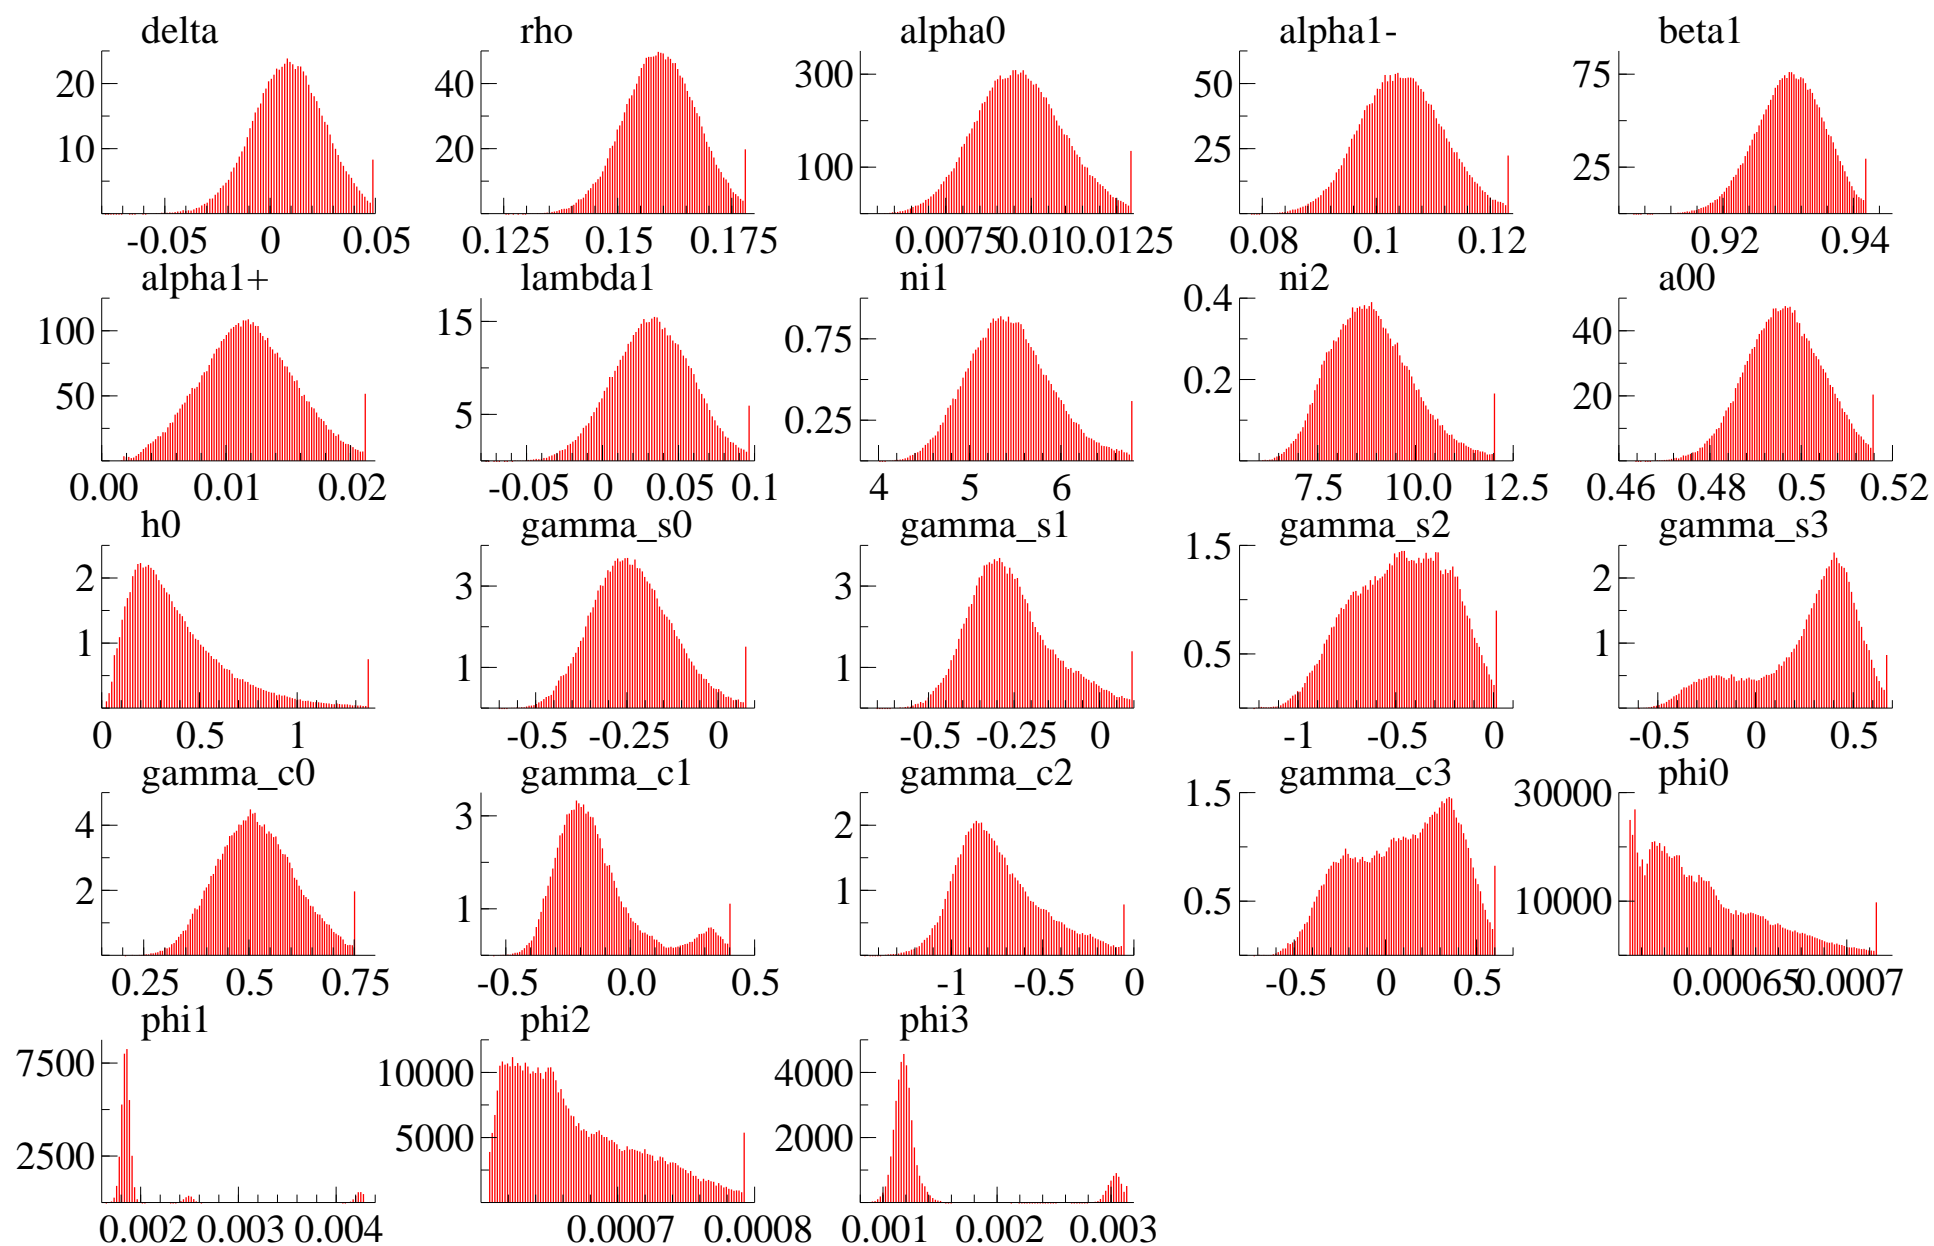

Supplement: Supplementary file 6 [file hist_ip.pdf › in_sample/M_3/hist_ip.pdf]

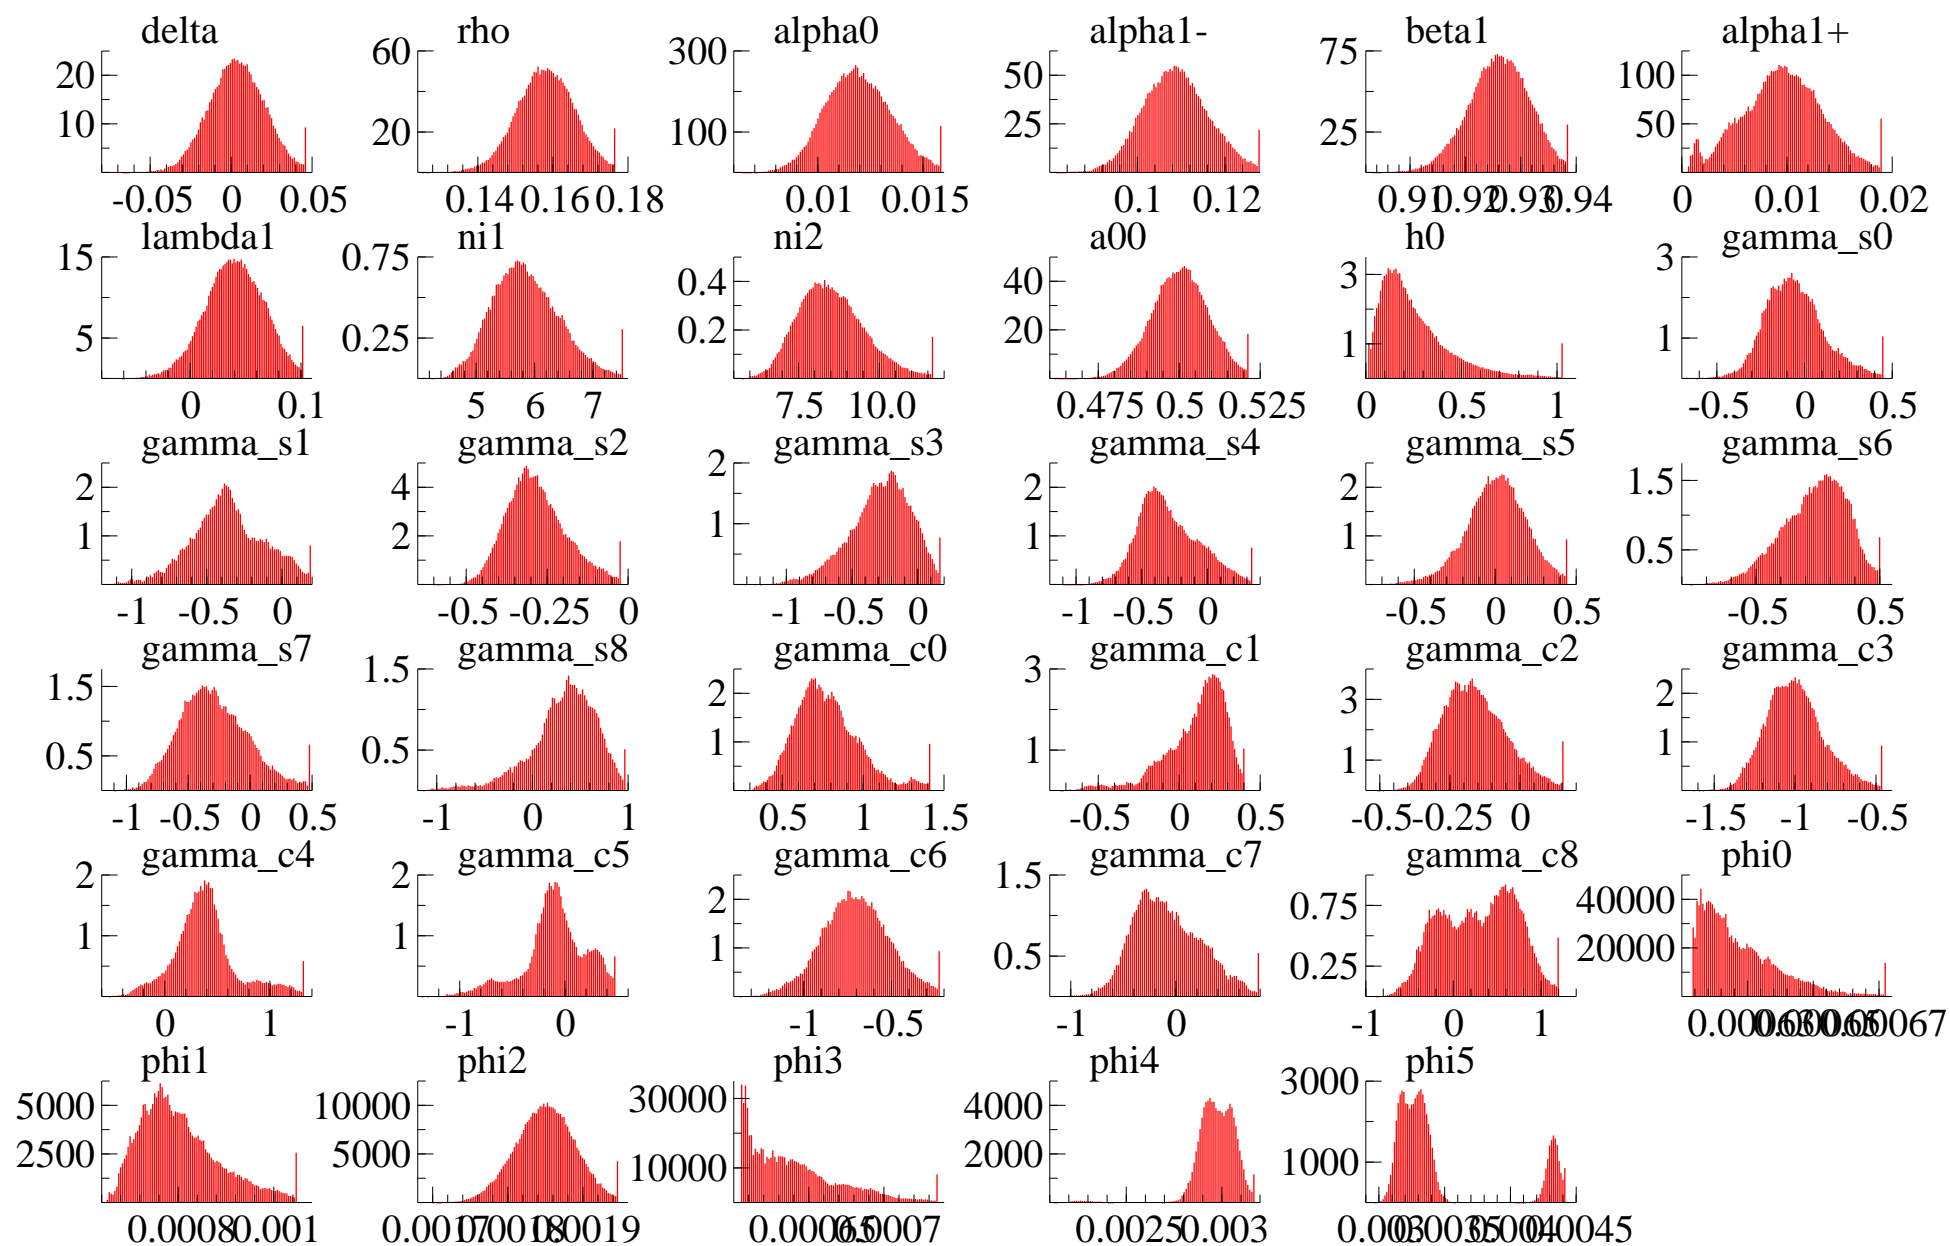

Supplement: Supplementary file 7 [file hist_ip.pdf › in_sample/M_4/hist_ip.pdf]
